# Supplementary material for: Construction and Validation of an Interpretable Machine Learning Model for Predicting Diabetes Risk in COPD Patients
Source: Research Square preprint supplement (doi:10.21203/rs.3.rs-7033945/v1), 2025-08-19
Supplement: Supplementary file 1 [file 5561b26a0f14372c9a0b561b.xlsx]

## Sheet: ICU未合并
subject_id	age	sex	race	weight	height	insurance	language	marital status	micu_code	wbc	wbc_uom	rbc	rbc_uom	neutjuedui	neutjuedui_uom	lymtjuedui	lymtjuedui_uom	plt	plt_uom	hgb	hgb_uom	rdw	rdw_uom	hct	hct_uom	albumin	albumin_uom	globulin	globulin_uom	tp	tp_uom	sodium	sodium_uom	potassium	potassium_uom	calcium	calcium_uom	chloride	chloride_uom	glucose	glucose_uom	glycosylatedhemoglobin	glycosylatedhemoglobin_uom	aniongap	aniongap_uom	ph	ph_uom	pco2	pco2_uom
10001884	77	F	BLACK/AFRICAN AMERICAN	65	157	Medicare	English	MARRIED	MICU	15.2	K/uL	3.85	m/uL	17.11	K/uL	0.55	K/uL	160	K/uL	10.9	g/dL	17.7	%	34.8	%	3.5	g/dL	NULL	NULL	NULL	NULL	137	mEq/L	4.1	mEq/L	9.25	mg/dL	97	mEq/L	146.5	mg/dL	NULL	NULL	11	mEq/L	7.32	units	70.5	mm Hg
10010399	68	F	WHITE - OTHER EUROPEAN	70.5	NULL	Medicare	English	SINGLE	Neuro Intermediate	20.35	K/uL	3.77	m/uL	NULL	NULL	NULL	NULL	304.5	K/uL	10.9	g/dL	13.95	%	34.5	%	NULL	NULL	NULL	NULL	NULL	NULL	138.5	mEq/L	3.85	mEq/L	9.55	mg/dL	100	mEq/L	124	mg/dL	NULL	NULL	12.5	mEq/L	NULL	NULL	NULL	NULL
10010471	90	F	WHITE	77.1	170	Medicare	English	WIDOWED	CCU	13	K/uL	3.54	m/uL	NULL	NULL	NULL	NULL	141	K/uL	11.3	g/dL	14	%	37.4	%	NULL	NULL	NULL	NULL	NULL	NULL	137	mEq/L	6	mEq/L	8.5	mg/dL	94	mEq/L	136	mg/dL	NULL	NULL	23	mEq/L	NULL	NULL	NULL	NULL
10011938	70	F	WHITE - OTHER EUROPEAN	112.55	163	NULL	English	MARRIED	CVICU	NULL	NULL	NULL	NULL	NULL	NULL	NULL	NULL	NULL	NULL	NULL	NULL	NULL	NULL	NULL	NULL	NULL	NULL	NULL	NULL	NULL	NULL	NULL	NULL	NULL	NULL	NULL	NULL	NULL	NULL	NULL	NULL	NULL	NULL	NULL	NULL	NULL	NULL	NULL	NULL
10017308	61	F	WHITE	58	NULL	Private	English	MARRIED	Neuro Intermediate	4.9	K/uL	3.51	m/uL	NULL	NULL	NULL	NULL	243	K/uL	11.3	g/dL	13.3	%	34.6	%	NULL	NULL	NULL	NULL	NULL	NULL	139	mEq/L	4.1	mEq/L	9	mg/dL	106	mEq/L	159	mg/dL	NULL	NULL	12	mEq/L	NULL	NULL	NULL	NULL
10017437	80	F	OTHER	68.95	149	Medicare	English	SINGLE	CVICU	19.63	K/uL	3.33	m/uL	8.99	K/uL	2.7	K/uL	98	K/uL	10.25	g/dL	14.15	%	31.45	%	NULL	NULL	NULL	NULL	NULL	NULL	141	mEq/L	3.97	mEq/L	8.8	mg/dL	111.33	mEq/L	105.5	mg/dL	NULL	NULL	13	mEq/L	7.37	units	31.27	mm Hg
10017882	87	M	UNKNOWN	67.15	170	Medicare	English	NULL	TSICU	9.5	K/uL	3.93	m/uL	NULL	NULL	NULL	NULL	144	K/uL	12.7	g/dL	14.2	%	39.5	%	NULL	NULL	NULL	NULL	NULL	NULL	135	mEq/L	3.9	mEq/L	8.65	mg/dL	102.5	mEq/L	125.5	mg/dL	NULL	NULL	6.5	mEq/L	NULL	NULL	NULL	NULL
10021927	72	F	WHITE	56.6	152	Medicare	English	MARRIED	MICU/SICU	55.9	K/uL	3.7	m/uL	52.32	K/uL	0.64	K/uL	375.5	K/uL	9.3	g/dL	18.25	%	28.6	%	NULL	NULL	NULL	NULL	NULL	NULL	127.6	mEq/L	3.68	mEq/L	6.68	mg/dL	99.5	mEq/L	80	mg/dL	NULL	NULL	12	mEq/L	7.34	units	44.4	mm Hg
10024982	86	M	WHITE	79.1	NULL	Medicare	English	MARRIED	CCU	12.6	K/uL	4	m/uL	NULL	NULL	NULL	NULL	198.5	K/uL	8.3	g/dL	18.1	%	29.7	%	NULL	NULL	NULL	NULL	NULL	NULL	143.33	mEq/L	4.2	mEq/L	8.63	mg/dL	107.33	mEq/L	119.67	mg/dL	NULL	NULL	20.33	mEq/L	7.35	units	41.33	mm Hg
10025804	53	M	WHITE	60	NULL	Medicare	English	NULL	TSICU	11.85	K/uL	2.9	m/uL	NULL	NULL	NULL	NULL	311.5	K/uL	8.43	g/dL	18.63	%	25.53	%	NULL	NULL	NULL	NULL	NULL	NULL	134	mEq/L	3.7	mEq/L	8.3	mg/dL	103	mEq/L	107.5	mg/dL	NULL	NULL	15	mEq/L	7.36	units	31	mm Hg
10038992	73	M	WHITE	92.7	183	Medicare	English	MARRIED	CVICU	16.17	K/uL	2.92	m/uL	13.01	K/uL	0.78	K/uL	128.67	K/uL	9.1	g/dL	15.5	%	27.58	%	NULL	NULL	NULL	NULL	NULL	NULL	140.5	mEq/L	4.17	mEq/L	8.9	mg/dL	103	mEq/L	149.5	mg/dL	NULL	NULL	15	mEq/L	7.43	units	43.14	mm Hg
10047351	76	M	WHITE	84.3	183	Private	English	SINGLE	CCU	4.7	K/uL	3.92	m/uL	NULL	NULL	NULL	NULL	91.5	K/uL	11.25	g/dL	15.2	%	36.6	%	NULL	NULL	NULL	NULL	NULL	NULL	143	mEq/L	4.2	mEq/L	8.4	mg/dL	110	mEq/L	125	mg/dL	NULL	NULL	11	mEq/L	7.33	units	41	mm Hg
10048001	73	M	WHITE - OTHER EUROPEAN	102.5	NULL	Medicare	English	MARRIED	MICU	18.88	K/uL	3.21	m/uL	17.89	K/uL	0.74	K/uL	103.4	K/uL	11.18	g/dL	17.4	%	34.22	%	NULL	NULL	NULL	NULL	NULL	NULL	137.67	mEq/L	4.5	mEq/L	8.67	mg/dL	103	mEq/L	187.33	mg/dL	NULL	NULL	17.67	mEq/L	7.23	units	43.4	mm Hg
10049041	60	M	BLACK/AFRICAN AMERICAN	67.8	173	Medicare	English	SINGLE	MICU/SICU	16.5	K/uL	2.75	m/uL	16.88	K/uL	0.92	K/uL	417.5	K/uL	8.95	g/dL	16.1	%	29.55	%	3.6	g/dL	NULL	NULL	NULL	NULL	140	mEq/L	5.7	mEq/L	9.2	mg/dL	99	mEq/L	135.5	mg/dL	NULL	NULL	6.5	mEq/L	7.36	units	70.5	mm Hg
10055694	66	F	BLACK/AFRICAN AMERICAN	66	163	Medicare	English	WIDOWED	MICU/SICU	6.27	K/uL	2.7	m/uL	NULL	NULL	NULL	NULL	202.33	K/uL	8.1	g/dL	22.2	%	26.93	%	NULL	NULL	NULL	NULL	NULL	NULL	135	mEq/L	4.4	mEq/L	9.2	mg/dL	94	mEq/L	86	mg/dL	NULL	NULL	14	mEq/L	NULL	NULL	NULL	NULL
10055939	67	M	WHITE	89.4	170	Medicare	English	SINGLE	TSICU	20.78	K/uL	2.91	m/uL	22.48	K/uL	1.54	K/uL	433.43	K/uL	8.18	g/dL	15.52	%	25.73	%	2.4	g/dL	NULL	NULL	NULL	NULL	140.4	mEq/L	5.46	mEq/L	7.44	mg/dL	106	mEq/L	107.8	mg/dL	NULL	NULL	16.6	mEq/L	7.22	units	49.11	mm Hg
10060531	83	M	WHITE - RUSSIAN	92.3	NULL	Medicare	Russian	DIVORCED	CCU	10.5	K/uL	4.24	m/uL	NULL	NULL	NULL	NULL	194	K/uL	10.3	g/dL	19.6	%	32.5	%	NULL	NULL	NULL	NULL	NULL	NULL	139.67	mEq/L	4.75	mEq/L	9.15	mg/dL	94.33	mEq/L	111	mg/dL	NULL	NULL	17.33	mEq/L	7.42	units	47.67	mm Hg
10066209	83	F	UNKNOWN	77.2	150	Medicare	English	NULL	MICU/SICU	16.8	K/uL	4.1	m/uL	19.25	K/uL	0.7	K/uL	214.33	K/uL	13.1	g/dL	15.53	%	40.9	%	3	g/dL	NULL	NULL	NULL	NULL	135.33	mEq/L	4.57	mEq/L	7.25	mg/dL	105.67	mEq/L	152.67	mg/dL	NULL	NULL	15.67	mEq/L	7.25	units	49.2	mm Hg
10067059	60	F	WHITE	92.5	NULL	Private	English	WIDOWED	Neuro Intermediate	12.25	K/uL	3.88	m/uL	NULL	NULL	NULL	NULL	288.5	K/uL	11.25	g/dL	13.05	%	35.5	%	NULL	NULL	NULL	NULL	NULL	NULL	137	mEq/L	4.5	mEq/L	8.7	mg/dL	103	mEq/L	144.5	mg/dL	NULL	NULL	11	mEq/L	NULL	NULL	NULL	NULL
10068474	71	F	WHITE	50	150	Medicare	English	MARRIED	MICU	10.35	K/uL	3.23	m/uL	8.86	K/uL	0.79	K/uL	247.5	K/uL	9.6	g/dL	16.5	%	30.9	%	2.2	g/dL	NULL	NULL	NULL	NULL	131.4	mEq/L	4.72	mEq/L	7.4	mg/dL	105.2	mEq/L	168.6	mg/dL	NULL	NULL	15.4	mEq/L	7.27	units	30	mm Hg
10076144	88	M	WHITE	65.7	NULL	Medicare	English	WIDOWED	SICU	4.55	K/uL	4.79	m/uL	NULL	NULL	NULL	NULL	237.5	K/uL	12.95	g/dL	15.95	%	42.35	%	NULL	NULL	NULL	NULL	NULL	NULL	138	mEq/L	4.7	mEq/L	8.8	mg/dL	98	mEq/L	122	mg/dL	NULL	NULL	16	mEq/L	7.28	units	60	mm Hg
10079545	90	F	UNKNOWN	49.1	157	Medicare	English	NULL	CCU	14.6	K/uL	4.09	m/uL	13.04	K/uL	0.65	K/uL	360	K/uL	11.4	g/dL	13.8	%	34.1	%	NULL	NULL	NULL	NULL	NULL	NULL	127	mEq/L	4.5	mEq/L	8.2	mg/dL	92	mEq/L	221	mg/dL	NULL	NULL	16	mEq/L	NULL	NULL	NULL	NULL
10086182	59	M	WHITE	70.8	NULL	Medicare	English	MARRIED	SICU	8.15	K/uL	3.25	m/uL	NULL	NULL	NULL	NULL	263.5	K/uL	10.05	g/dL	13.9	%	31.35	%	NULL	NULL	NULL	NULL	NULL	NULL	140	mEq/L	4.2	mEq/L	8.55	mg/dL	109	mEq/L	105	mg/dL	NULL	NULL	10.5	mEq/L	7.43	units	33	mm Hg
10087943	65	F	WHITE	72.5	171	Private	English	SINGLE	CVICU	9.25	K/uL	3.71	m/uL	NULL	NULL	NULL	NULL	139	K/uL	11.25	g/dL	13.55	%	34.75	%	NULL	NULL	NULL	NULL	NULL	NULL	139.5	mEq/L	4	mEq/L	NULL	NULL	108	mEq/L	190	mg/dL	NULL	NULL	11	mEq/L	NULL	NULL	NULL	NULL
10088776	73	F	WHITE	80	NULL	Medicare	English	SINGLE	Neuro Stepdown	7.6	K/uL	2.69	m/uL	NULL	NULL	NULL	NULL	201	K/uL	8.3	g/dL	14.7	%	26.9	%	NULL	NULL	NULL	NULL	NULL	NULL	138	mEq/L	3.5	mEq/L	8.1	mg/dL	105	mEq/L	86	mg/dL	NULL	NULL	11	mEq/L	NULL	NULL	NULL	NULL
10088914	83	M	WHITE	84.5	180	Medicare	English	WIDOWED	CVICU	17.5	K/uL	3.06	m/uL	14.68	K/uL	2.79	K/uL	102.33	K/uL	9.67	g/dL	13.3	%	29.5	%	NULL	NULL	NULL	NULL	NULL	NULL	135	mEq/L	4	mEq/L	7.9	mg/dL	109.5	mEq/L	167	mg/dL	NULL	NULL	14	mEq/L	7.35	units	40.33	mm Hg
10092227	80	F	UNKNOWN	106.1	163	Medicare	English	NULL	MICU	16.93	K/uL	5.16	m/uL	NULL	NULL	NULL	NULL	80.67	K/uL	14.3	g/dL	17.33	%	47.4	%	2.8	g/dL	NULL	NULL	NULL	NULL	147	mEq/L	4	mEq/L	7.53	mg/dL	108	mEq/L	180.33	mg/dL	6.2	%	19	mEq/L	7.24	units	61	mm Hg
10099914	82	F	WHITE	64.8	NULL	Medicare	English	NULL	MICU	8.5	K/uL	3.18	m/uL	NULL	NULL	NULL	NULL	164.5	K/uL	9.9	g/dL	14.25	%	34.1	%	3.3	g/dL	NULL	NULL	NULL	NULL	167.5	mEq/L	3.75	mEq/L	10	mg/dL	128.5	mEq/L	227	mg/dL	NULL	NULL	9	mEq/L	7.39	units	55	mm Hg
10107943	86	F	WHITE - OTHER EUROPEAN	60	152	Medicare	English	WIDOWED	CCU	15.21	K/uL	3.35	m/uL	NULL	NULL	NULL	NULL	192.29	K/uL	10.13	g/dL	14.46	%	30.97	%	NULL	NULL	NULL	NULL	NULL	NULL	136.6	mEq/L	4.52	mEq/L	8.76	mg/dL	94.4	mEq/L	147.6	mg/dL	NULL	NULL	19.4	mEq/L	7.45	units	36.11	mm Hg
10108435	72	M	WHITE	103.1	NULL	Medicaid	English	SINGLE	MICU/SICU	4.25	K/uL	2.26	m/uL	NULL	NULL	NULL	NULL	108	K/uL	6.15	g/dL	16.63	%	19.9	%	2.5	g/dL	NULL	NULL	NULL	NULL	136.5	mEq/L	4.55	mEq/L	7.6	mg/dL	102.5	mEq/L	96	mg/dL	NULL	NULL	10	mEq/L	7.31	units	66	mm Hg
10109826	63	F	WHITE	63.05	NULL	Private	English	DIVORCED	MICU/SICU	15.55	K/uL	2.78	m/uL	16.57	K/uL	0.66	K/uL	302	K/uL	7.95	g/dL	15.23	%	25.1	%	NULL	NULL	NULL	NULL	NULL	NULL	142	mEq/L	4.3	mEq/L	8	mg/dL	104.5	mEq/L	152	mg/dL	NULL	NULL	9.5	mEq/L	7.43	units	48.57	mm Hg
10111112	77	F	WHITE	73.9	NULL	Medicare	English	WIDOWED	MICU	34.45	K/uL	1.94	m/uL	20.77	K/uL	3.41	K/uL	23	K/uL	6.17	g/dL	21.5	%	20	%	3.8	g/dL	1.2	g/dL	5	g/dL	139	mEq/L	4.1	mEq/L	7.7	mg/dL	109	mEq/L	101	mg/dL	NULL	NULL	22	mEq/L	7.33	units	26.33	mm Hg
10111136	79	M	BLACK/AFRICAN AMERICAN	37.4	NULL	Medicare	English	MARRIED	MICU/SICU	7.3	K/uL	3.45	m/uL	NULL	NULL	NULL	NULL	273	K/uL	9.7	g/dL	13.7	%	31.7	%	NULL	NULL	NULL	NULL	NULL	NULL	143	mEq/L	4.5	mEq/L	NULL	NULL	96	mEq/L	135	mg/dL	NULL	NULL	19	mEq/L	7.38	units	63	mm Hg
10113381	89	F	WHITE	95.2	NULL	Medicare	English	SINGLE	Neuro Intermediate	8.7	K/uL	3.85	m/uL	NULL	NULL	NULL	NULL	181	K/uL	10.1	g/dL	14.3	%	32.2	%	NULL	NULL	NULL	NULL	NULL	NULL	145	mEq/L	4.1	mEq/L	8.9	mg/dL	110	mEq/L	122	mg/dL	NULL	NULL	10	mEq/L	NULL	NULL	NULL	NULL
10116054	75	F	WHITE - OTHER EUROPEAN	72.9	165	Medicare	English	MARRIED	SICU	15.8	K/uL	3.61	m/uL	NULL	NULL	NULL	NULL	197	K/uL	9.75	g/dL	17	%	30.75	%	2	g/dL	NULL	NULL	NULL	NULL	137	mEq/L	5.05	mEq/L	7.75	mg/dL	110.5	mEq/L	199	mg/dL	NULL	NULL	11	mEq/L	7.27	units	40.67	mm Hg
10116419	56	M	UNKNOWN	190	180	Medicaid	English	NULL	MICU	NULL	NULL	NULL	NULL	NULL	NULL	NULL	NULL	NULL	NULL	NULL	NULL	NULL	NULL	NULL	NULL	NULL	NULL	NULL	NULL	NULL	NULL	NULL	NULL	NULL	NULL	NULL	NULL	NULL	NULL	NULL	NULL	NULL	NULL	NULL	NULL	NULL	NULL	NULL	NULL
10123063	64	M	WHITE	NULL	NULL	Medicaid	English	SINGLE	Neuro SICU	5	K/uL	3.82	m/uL	NULL	NULL	NULL	NULL	128	K/uL	12.8	g/dL	13.4	%	38.3	%	NULL	NULL	NULL	NULL	NULL	NULL	136	mEq/L	3.1	mEq/L	8.4	mg/dL	97	mEq/L	93	mg/dL	NULL	NULL	16	mEq/L	NULL	NULL	NULL	NULL
10124966	63	F	WHITE	53.1	163	Medicaid	English	MARRIED	MICU/SICU	10.9	K/uL	3.98	m/uL	7.25	K/uL	2.48	K/uL	329	K/uL	11.3	g/dL	14.2	%	35.9	%	NULL	NULL	NULL	NULL	NULL	NULL	144	mEq/L	3.8	mEq/L	8.6	mg/dL	103	mEq/L	96	mg/dL	NULL	NULL	10	mEq/L	NULL	NULL	NULL	NULL
10128191	86	M	WHITE	72.5	165	Medicare	English	WIDOWED	TSICU	32.3	K/uL	3.35	m/uL	NULL	NULL	NULL	NULL	265	K/uL	9.03	g/dL	16.27	%	29.7	%	NULL	NULL	NULL	NULL	NULL	NULL	133.5	mEq/L	4.9	mEq/L	7.75	mg/dL	103.5	mEq/L	186	mg/dL	NULL	NULL	11	mEq/L	7.33	units	36.71	mm Hg
10131080	74	M	WHITE	88.4	NULL	Medicare	English	MARRIED	Neuro Intermediate	8	K/uL	3.87	m/uL	NULL	NULL	NULL	NULL	155	K/uL	11.8	g/dL	13.4	%	36.1	%	NULL	NULL	NULL	NULL	NULL	NULL	144	mEq/L	4.2	mEq/L	8.5	mg/dL	109	mEq/L	99	mg/dL	NULL	NULL	12	mEq/L	NULL	NULL	NULL	NULL
10131647	59	F	UNKNOWN	59.5	NULL	Medicaid	English	NULL	MICU/SICU	12.5	K/uL	3.2	m/uL	10.01	K/uL	1.87	K/uL	97	K/uL	10.8	g/dL	15.15	%	32.1	%	2.9	g/dL	NULL	NULL	NULL	NULL	139	mEq/L	4.1	mEq/L	7.25	mg/dL	98.5	mEq/L	87.5	mg/dL	NULL	NULL	12.5	mEq/L	7.36	units	53	mm Hg
10132611	74	M	WHITE	86.3	NULL	Medicare	English	SINGLE	MICU	6.7	K/uL	2.27	m/uL	NULL	NULL	NULL	NULL	146.67	K/uL	6.8	g/dL	17.8	%	20.5	%	3.5	g/dL	NULL	NULL	7	g/dL	139.5	mEq/L	4.3	mEq/L	8.25	mg/dL	101.5	mEq/L	154	mg/dL	NULL	NULL	23	mEq/L	7.38	units	27.5	mm Hg
10133363	79	F	WHITE	99.2333	NULL	Medicare	English	SINGLE	MICU	9	K/uL	3.55	m/uL	NULL	NULL	NULL	NULL	263	K/uL	10.1	g/dL	17	%	35.5	%	NULL	NULL	NULL	NULL	NULL	NULL	145.33	mEq/L	5	mEq/L	9.4	mg/dL	95.33	mEq/L	132.67	mg/dL	NULL	NULL	11	mEq/L	7.31	units	89.25	mm Hg
10141173	72	F	WHITE	56.7	147	Medicare	English	MARRIED	CVICU	13.58	K/uL	3.14	m/uL	11.75	K/uL	3.37	K/uL	133.5	K/uL	9.4	g/dL	13.55	%	28.3	%	NULL	NULL	NULL	NULL	NULL	NULL	135	mEq/L	4.5	mEq/L	8.9	mg/dL	106.5	mEq/L	103	mg/dL	NULL	NULL	14	mEq/L	7.4	units	40.88	mm Hg
10150167	74	F	WHITE	127.167	157	Medicare	English	MARRIED	TSICU	14.55	K/uL	4.39	m/uL	NULL	NULL	NULL	NULL	221	K/uL	12.85	g/dL	14.9	%	40.55	%	3.3	g/dL	NULL	NULL	NULL	NULL	142.5	mEq/L	3.95	mEq/L	7.9	mg/dL	109.5	mEq/L	154.5	mg/dL	NULL	NULL	10	mEq/L	7.3	units	52	mm Hg
10151766	69	F	HISPANIC/LATINO - COLUMBIAN	53	NULL	Medicaid	Spanish	MARRIED	MICU/SICU	4.9	K/uL	5.09	m/uL	4.28	K/uL	0.63	K/uL	122	K/uL	15.85	g/dL	13.25	%	47.5	%	NULL	NULL	NULL	NULL	NULL	NULL	140.5	mEq/L	4.25	mEq/L	9.75	mg/dL	100.5	mEq/L	158.5	mg/dL	NULL	NULL	13	mEq/L	7.4	units	45.25	mm Hg
10155483	61	M	WHITE	53.7	170	Medicaid	English	SINGLE	TSICU	10.67	K/uL	3.76	m/uL	8.98	K/uL	0.66	K/uL	260.67	K/uL	11.4	g/dL	15.73	%	34.27	%	NULL	NULL	NULL	NULL	NULL	NULL	129.75	mEq/L	4.2	mEq/L	9.17	mg/dL	92	mEq/L	115.25	mg/dL	NULL	NULL	10.25	mEq/L	7.43	units	45	mm Hg
10155734	76	M	BLACK/AFRICAN AMERICAN	82.2	NULL	Medicare	English	MARRIED	MICU/SICU	4.9	K/uL	3.05	m/uL	NULL	NULL	NULL	NULL	156	K/uL	9.2	g/dL	17	%	26.9	%	NULL	NULL	NULL	NULL	NULL	NULL	138.5	mEq/L	4	mEq/L	7.3	mg/dL	98	mEq/L	134.5	mg/dL	NULL	NULL	12	mEq/L	NULL	NULL	NULL	NULL
10156119	60	F	BLACK/AFRICAN AMERICAN	106.633	168	Medicaid	English	MARRIED	Neuro SICU	20.25	K/uL	4.16	m/uL	NULL	NULL	NULL	NULL	326.5	K/uL	10.5	g/dL	18.25	%	31.35	%	NULL	NULL	NULL	NULL	NULL	NULL	139.33	mEq/L	4.27	mEq/L	8.53	mg/dL	103.67	mEq/L	112.67	mg/dL	NULL	NULL	10.33	mEq/L	NULL	NULL	NULL	NULL
10159481	82	F	UNABLE TO OBTAIN	75.4	NULL	Medicare	English	NULL	SICU	8.4	K/uL	2.85	m/uL	NULL	NULL	NULL	NULL	315.5	K/uL	8.35	g/dL	14.1	%	25.3	%	NULL	NULL	NULL	NULL	NULL	NULL	132	mEq/L	3.6	mEq/L	8.95	mg/dL	100	mEq/L	427	mg/dL	NULL	NULL	11.5	mEq/L	7.35	units	46	mm Hg
10165522	65	M	WHITE - OTHER EUROPEAN	87.5	175	Medicare	English	SINGLE	CVICU	15.7	K/uL	4.01	m/uL	12.46	K/uL	1.38	K/uL	139.33	K/uL	10.73	g/dL	14.7	%	33.14	%	NULL	NULL	NULL	NULL	NULL	NULL	135	mEq/L	4.75	mEq/L	8.4	mg/dL	98	mEq/L	138	mg/dL	NULL	NULL	14.5	mEq/L	7.39	units	41	mm Hg
10171247	77	M	UNKNOWN	104.5	183	Medicare	English	NULL	CCU	4.83	K/uL	3.7	m/uL	NULL	NULL	NULL	NULL	127.33	K/uL	11.2	g/dL	16.87	%	36.5	%	3.8	g/dL	NULL	NULL	NULL	NULL	141.33	mEq/L	4.33	mEq/L	8.3	mg/dL	106.33	mEq/L	90	mg/dL	NULL	NULL	9	mEq/L	NULL	NULL	NULL	NULL
10172520	56	M	WHITE	86.1	NULL	Medicaid	English	SINGLE	Neuro Intermediate	NULL	NULL	NULL	NULL	NULL	NULL	NULL	NULL	NULL	NULL	NULL	NULL	NULL	NULL	NULL	NULL	NULL	NULL	NULL	NULL	NULL	NULL	NULL	NULL	NULL	NULL	NULL	NULL	NULL	NULL	NULL	NULL	NULL	NULL	NULL	NULL	NULL	NULL	NULL	NULL
10177348	92	F	UNKNOWN	65.4	157	Medicare	English	NULL	MICU/SICU	7.5	K/uL	2.37	m/uL	6.72	K/uL	1.09	K/uL	43.33	K/uL	6.77	g/dL	23.17	%	20.37	%	NULL	NULL	NULL	NULL	NULL	NULL	143.33	mEq/L	5.1	mEq/L	9.03	mg/dL	113	mEq/L	110	mg/dL	NULL	NULL	13.67	mEq/L	7.33	units	47.5	mm Hg
10198197	81	M	UNKNOWN	70.9	175	Medicare	English	NULL	Neuro Intermediate	7	K/uL	4.55	m/uL	NULL	NULL	NULL	NULL	147	K/uL	13.8	g/dL	12.6	%	42.4	%	3.5	g/dL	NULL	NULL	NULL	NULL	139	mEq/L	4.4	mEq/L	8.6	mg/dL	104	mEq/L	99	mg/dL	5.8	%	13	mEq/L	NULL	NULL	NULL	NULL
10198921	67	M	WHITE	79	170	Medicare	English	MARRIED	CVICU	11.63	K/uL	3.6	m/uL	7.3	K/uL	1.58	K/uL	144.33	K/uL	10.47	g/dL	13.37	%	32.14	%	NULL	NULL	NULL	NULL	NULL	NULL	138	mEq/L	4.63	mEq/L	7.6	mg/dL	108	mEq/L	130	mg/dL	NULL	NULL	9	mEq/L	7.39	units	41.17	mm Hg
10200966	60	M	WHITE	100.6	NULL	Medicare	English	MARRIED	MICU/SICU	10.72	K/uL	2.22	m/uL	10.17	K/uL	0.9	K/uL	234.83	K/uL	6.8	g/dL	17.45	%	20.3	%	3.7	g/dL	NULL	NULL	NULL	NULL	127.5	mEq/L	3.53	mEq/L	8.53	mg/dL	93.75	mEq/L	102	mg/dL	NULL	NULL	19.75	mEq/L	NULL	NULL	NULL	NULL
10201220	82	M	WHITE	121.2	183	Medicare	English	SINGLE	MICU	6.6	K/uL	3.19	m/uL	NULL	NULL	NULL	NULL	141	K/uL	10	g/dL	14.5	%	28.8	%	NULL	NULL	NULL	NULL	NULL	NULL	121	mEq/L	3.95	mEq/L	8	mg/dL	87.5	mEq/L	95	mg/dL	NULL	NULL	10.5	mEq/L	7.41	units	35	mm Hg
10201645	61	M	BLACK/AFRICAN	192	180	Medicare	English	SINGLE	MICU/SICU	11.17	K/uL	3.24	m/uL	7.84	K/uL	2.46	K/uL	245	K/uL	9.5	g/dL	17.57	%	30.13	%	NULL	NULL	NULL	NULL	NULL	NULL	142.5	mEq/L	4.35	mEq/L	9.95	mg/dL	107	mEq/L	123.5	mg/dL	5.1	%	15.5	mEq/L	7.39	units	35.2	mm Hg
10202208	40	F	WHITE	70	NULL	Medicaid	English	SINGLE	Neuro Intermediate	NULL	NULL	NULL	NULL	NULL	NULL	NULL	NULL	NULL	NULL	NULL	NULL	NULL	NULL	NULL	NULL	NULL	NULL	NULL	NULL	NULL	NULL	NULL	NULL	NULL	NULL	NULL	NULL	NULL	NULL	NULL	NULL	NULL	NULL	NULL	NULL	NULL	NULL	NULL	NULL
10202580	84	F	OTHER	67.6667	NULL	Medicare	Russian	NULL	SICU	10.7	K/uL	3.62	m/uL	NULL	NULL	NULL	NULL	217	K/uL	11.5	g/dL	12.8	%	34.5	%	NULL	NULL	NULL	NULL	NULL	NULL	139	mEq/L	4.2	mEq/L	8.7	mg/dL	104	mEq/L	105	mg/dL	5.1	%	11	mEq/L	NULL	NULL	NULL	NULL
10205295	91	M	WHITE	100	178	Medicare	English	WIDOWED	CCU	11.6	K/uL	3.83	m/uL	NULL	NULL	NULL	NULL	182	K/uL	12	g/dL	13.2	%	36.2	%	NULL	NULL	NULL	NULL	NULL	NULL	131.5	mEq/L	3.7	mEq/L	8.7	mg/dL	93.5	mEq/L	137	mg/dL	NULL	NULL	16	mEq/L	7.37	units	40	mm Hg
10208954	87	F	UNKNOWN	38.9	NULL	Medicare	English	MARRIED	MICU	12.4	K/uL	3.38	m/uL	9.29	K/uL	1.86	K/uL	190	K/uL	10.55	g/dL	18.4	%	35.5	%	2.9	g/dL	NULL	NULL	NULL	NULL	136	mEq/L	4.3	mEq/L	9.4	mg/dL	103.5	mEq/L	189	mg/dL	NULL	NULL	8	mEq/L	7.16	units	63.5	mm Hg
10209410	67	M	WHITE	82.3	183	Medicare	English	SINGLE	CCU	12.15	K/uL	3.71	m/uL	10.58	K/uL	0.66	K/uL	234.5	K/uL	11.55	g/dL	12.9	%	35.65	%	NULL	NULL	NULL	NULL	NULL	NULL	142	mEq/L	4.43	mEq/L	8.37	mg/dL	102.33	mEq/L	133.67	mg/dL	NULL	NULL	15	mEq/L	7.33	units	51	mm Hg
10212427	73	F	WHITE	67.7	NULL	Medicare	English	WIDOWED	MICU	31.2	K/uL	3.87	m/uL	NULL	NULL	NULL	NULL	265	K/uL	11.05	g/dL	12.5	%	34.1	%	NULL	NULL	NULL	NULL	NULL	NULL	129.5	mEq/L	4.6	mEq/L	8.45	mg/dL	92.5	mEq/L	192	mg/dL	NULL	NULL	18.5	mEq/L	7.34	units	48	mm Hg
10221321	45	F	WHITE	104.5	NULL	Private	English	DIVORCED	MICU	5.8	K/uL	3.59	m/uL	NULL	NULL	NULL	NULL	239	K/uL	9.4	g/dL	18.1	%	30.9	%	NULL	NULL	NULL	NULL	NULL	NULL	139.67	mEq/L	4.27	mEq/L	8.87	mg/dL	94.33	mEq/L	145.33	mg/dL	NULL	NULL	12	mEq/L	7.42	units	56	mm Hg
10224362	68	M	UNKNOWN	129.2	188	Medicare	English	MARRIED	TSICU	9.85	K/uL	4.24	m/uL	NULL	NULL	NULL	NULL	143.5	K/uL	13.1	g/dL	13.4	%	39.6	%	NULL	NULL	NULL	NULL	NULL	NULL	139.5	mEq/L	4.1	mEq/L	8.45	mg/dL	104.5	mEq/L	108.5	mg/dL	NULL	NULL	15.5	mEq/L	NULL	NULL	NULL	NULL
10225055	72	F	WHITE	96.9	170	Medicare	English	DIVORCED	Neuro Intermediate	15.3	K/uL	3.94	m/uL	16.2	K/uL	0.5	K/uL	211.5	K/uL	12	g/dL	12.7	%	37.65	%	3.75	g/dL	NULL	NULL	NULL	NULL	143	mEq/L	4.2	mEq/L	8.5	mg/dL	105.5	mEq/L	124	mg/dL	5.2	%	16	mEq/L	7.38	units	43	mm Hg
10229264	56	F	UNKNOWN	84.0333	165	Medicaid	English	NULL	Neuro SICU	9.35	K/uL	5.79	m/uL	4.95	K/uL	2.59	K/uL	208.5	K/uL	10.85	g/dL	19.9	%	36.2	%	4	g/dL	NULL	NULL	NULL	NULL	137	mEq/L	5.63	mEq/L	8.53	mg/dL	100.33	mEq/L	117	mg/dL	NULL	NULL	10	mEq/L	7.39	units	52	mm Hg
10230936	92	M	WHITE	62.25	170	Medicare	English	WIDOWED	TSICU	7.1	K/uL	2.77	m/uL	6.88	K/uL	0.09	K/uL	157	K/uL	9.85	g/dL	14.95	%	29.85	%	3.25	g/dL	NULL	NULL	NULL	NULL	140.33	mEq/L	4.77	mEq/L	8.77	mg/dL	100.33	mEq/L	122.33	mg/dL	NULL	NULL	18.67	mEq/L	7.39	units	35.67	mm Hg
10231775	61	F	WHITE	56.7	NULL	Private	English	MARRIED	Neuro Intermediate	8.3	K/uL	3.47	m/uL	NULL	NULL	NULL	NULL	156	K/uL	11	g/dL	12.7	%	33.4	%	NULL	NULL	NULL	NULL	NULL	NULL	146	mEq/L	3.4	mEq/L	8	mg/dL	113	mEq/L	133	mg/dL	NULL	NULL	13	mEq/L	NULL	NULL	NULL	NULL
10232286	67	M	WHITE	85	175	Private	English	SINGLE	MICU	15.2	K/uL	2.11	m/uL	14.96	K/uL	0.7	K/uL	116.5	K/uL	7.63	g/dL	19.43	%	21.65	%	2.5	g/dL	NULL	NULL	NULL	NULL	124.67	mEq/L	3.6	mEq/L	8.4	mg/dL	87.67	mEq/L	160	mg/dL	NULL	NULL	22	mEq/L	7.39	units	32.5	mm Hg
10233273	66	F	WHITE	114	NULL	Medicare	English	DIVORCED	Neuro SICU	10.1	K/uL	4.01	m/uL	NULL	NULL	NULL	NULL	223	K/uL	11.7	g/dL	13.7	%	37.7	%	NULL	NULL	NULL	NULL	NULL	NULL	139.67	mEq/L	4.05	mEq/L	10.95	mg/dL	101	mEq/L	104.5	mg/dL	NULL	NULL	14.5	mEq/L	NULL	NULL	NULL	NULL
10236280	74	M	UNKNOWN	164	183	Medicare	English	NULL	MICU/SICU	22.4	K/uL	5.04	m/uL	20.49	K/uL	0.22	K/uL	35	K/uL	16.2	g/dL	18.6	%	51.85	%	2.7	g/dL	NULL	NULL	NULL	NULL	136	mEq/L	6.1	mEq/L	8.65	mg/dL	110.5	mEq/L	109.5	mg/dL	NULL	NULL	14	mEq/L	7.14	units	61.6	mm Hg
10237225	72	F	WHITE	67.7	160	Other	English	SINGLE	CCU	13.6	K/uL	3.54	m/uL	NULL	NULL	NULL	NULL	140	K/uL	10	g/dL	12.3	%	32.5	%	NULL	NULL	NULL	NULL	NULL	NULL	141.33	mEq/L	3.93	mEq/L	8.45	mg/dL	102	mEq/L	132.33	mg/dL	NULL	NULL	10	mEq/L	7.27	units	64.33	mm Hg
10240102	70	M	UNKNOWN	59	183	Private	English	NULL	MICU	11.38	K/uL	3.66	m/uL	NULL	NULL	NULL	NULL	209.75	K/uL	12.58	g/dL	12.88	%	37.45	%	3.9	g/dL	NULL	NULL	NULL	NULL	137.4	mEq/L	3.94	mEq/L	7.94	mg/dL	102.6	mEq/L	137.8	mg/dL	NULL	NULL	17.4	mEq/L	7.35	units	42	mm Hg
10247225	76	F	BLACK/AFRICAN AMERICAN	70	NULL	Medicare	English	WIDOWED	MICU	8.6	K/uL	4.21	m/uL	NULL	NULL	NULL	NULL	225	K/uL	12.15	g/dL	15.3	%	38	%	NULL	NULL	NULL	NULL	NULL	NULL	142	mEq/L	3.8	mEq/L	8.45	mg/dL	108.5	mEq/L	104	mg/dL	5.5	%	12	mEq/L	NULL	NULL	NULL	NULL
10250736	79	F	UNKNOWN	81	168	Medicare	English	NULL	CCU	18.83	K/uL	4.16	m/uL	NULL	NULL	NULL	NULL	208.33	K/uL	11.3	g/dL	14.83	%	37.07	%	NULL	NULL	NULL	NULL	NULL	NULL	136.67	mEq/L	4	mEq/L	7.57	mg/dL	106.67	mEq/L	177.33	mg/dL	NULL	NULL	14	mEq/L	7.36	units	38.67	mm Hg
10258020	79	M	WHITE	128	185	Medicare	English	MARRIED	CCU	6.7	K/uL	4.11	m/uL	NULL	NULL	NULL	NULL	293	K/uL	12.3	g/dL	14.5	%	40.9	%	NULL	NULL	NULL	NULL	NULL	NULL	137	mEq/L	5.05	mEq/L	9	mg/dL	87	mEq/L	128.5	mg/dL	NULL	NULL	11	mEq/L	7.33	units	85.33	mm Hg
10261086	64	M	WHITE	108.9	178	Medicare	English	MARRIED	CVICU	9.43	K/uL	3.59	m/uL	9.73	K/uL	1.55	K/uL	90	K/uL	10.6	g/dL	12.63	%	32.68	%	NULL	NULL	NULL	NULL	NULL	NULL	140	mEq/L	4.4	mEq/L	8.2	mg/dL	106	mEq/L	120	mg/dL	NULL	NULL	8	mEq/L	7.36	units	43.78	mm Hg
10269109	56	M	WHITE	134.2	183	Medicare	English	MARRIED	CCU	11.5	K/uL	3.73	m/uL	NULL	NULL	NULL	NULL	229	K/uL	12.1	g/dL	13.9	%	36.1	%	NULL	NULL	NULL	NULL	NULL	NULL	139	mEq/L	6.5	mEq/L	8.7	mg/dL	105	mEq/L	120	mg/dL	NULL	NULL	16	mEq/L	NULL	NULL	NULL	NULL
10277287	63	M	WHITE	78.8	168	Private	English	MARRIED	SICU	18.9	K/uL	4.62	m/uL	NULL	NULL	NULL	NULL	146	K/uL	14	g/dL	12.7	%	41.8	%	NULL	NULL	NULL	NULL	NULL	NULL	138	mEq/L	4.2	mEq/L	9.35	mg/dL	100	mEq/L	170.5	mg/dL	NULL	NULL	19	mEq/L	7.36	units	39	mm Hg
10277566	72	M	WHITE	90.2	NULL	Medicare	English	SINGLE	MICU	16.9	K/uL	2.35	m/uL	17.86	K/uL	1.9	K/uL	246.5	K/uL	7.65	g/dL	15.7	%	23.65	%	3.8	g/dL	NULL	NULL	NULL	NULL	138.5	mEq/L	4.45	mEq/L	8.75	mg/dL	100.5	mEq/L	126.5	mg/dL	NULL	NULL	18.5	mEq/L	7.36	units	36	mm Hg
10279740	51	F	WHITE	85	NULL	Medicare	English	SINGLE	Neuro Intermediate	16.4	K/uL	4.18	m/uL	NULL	NULL	NULL	NULL	312	K/uL	11.9	g/dL	13.5	%	35.4	%	NULL	NULL	NULL	NULL	NULL	NULL	139	mEq/L	3.9	mEq/L	8.8	mg/dL	103	mEq/L	102	mg/dL	NULL	NULL	15	mEq/L	NULL	NULL	NULL	NULL
10281759	70	F	WHITE	75	NULL	Private	English	MARRIED	MICU/SICU	5.2	K/uL	3.27	m/uL	4.84	K/uL	0.28	K/uL	167	K/uL	9.3	g/dL	14.3	%	31.4	%	NULL	NULL	NULL	NULL	NULL	NULL	144	mEq/L	4.1	mEq/L	10.4	mg/dL	96	mEq/L	150	mg/dL	NULL	NULL	11	mEq/L	7.32	units	80.5	mm Hg
10284680	73	F	BLACK/AFRICAN AMERICAN	86.9	NULL	Medicare	English	SINGLE	MICU/SICU	9.8	K/uL	4.66	m/uL	9.24	K/uL	1.36	K/uL	396	K/uL	12.3	g/dL	15.85	%	39.15	%	3.5	g/dL	NULL	NULL	NULL	NULL	135	mEq/L	3.1	mEq/L	9.35	mg/dL	101	mEq/L	103.5	mg/dL	NULL	NULL	14	mEq/L	7.44	units	35	mm Hg
10286301	62	M	UNKNOWN	93.1	175	Private	English	NULL	MICU	4.4	K/uL	3.39	m/uL	2.48	K/uL	0.99	K/uL	71.33	K/uL	10	g/dL	16.57	%	33.93	%	3.5	g/dL	NULL	NULL	NULL	NULL	138.5	mEq/L	3.73	mEq/L	9	mg/dL	85	mEq/L	69.5	mg/dL	NULL	NULL	11.5	mEq/L	7.42	units	74.25	mm Hg
10296047	62	F	UNKNOWN	83	NULL	Medicaid	English	NULL	SICU	16.75	K/uL	2.77	m/uL	13.99	K/uL	0.93	K/uL	455.5	K/uL	8.2	g/dL	17	%	25.3	%	2	g/dL	NULL	NULL	NULL	NULL	138	mEq/L	4.93	mEq/L	7.83	mg/dL	103.25	mEq/L	146.5	mg/dL	NULL	NULL	13.25	mEq/L	7.46	units	31	mm Hg
10308257	79	F	WHITE	64.2333	NULL	Medicare	English	NULL	CVICU	7.95	K/uL	2.17	m/uL	6.49	K/uL	0.28	K/uL	306	K/uL	7.8	g/dL	18.55	%	23.95	%	3.15	g/dL	NULL	NULL	NULL	NULL	141	mEq/L	4.47	mEq/L	8.93	mg/dL	99.67	mEq/L	199.67	mg/dL	NULL	NULL	12.33	mEq/L	7.43	units	45	mm Hg
10312052	71	M	WHITE	70	196	Medicare	English	MARRIED	TSICU	21.3	K/uL	4.35	m/uL	13.5	K/uL	4.29	K/uL	468.5	K/uL	12.15	g/dL	16.15	%	39.5	%	3.3	g/dL	NULL	NULL	NULL	NULL	134.5	mEq/L	5.2	mEq/L	9.25	mg/dL	96	mEq/L	161.5	mg/dL	NULL	NULL	12	mEq/L	7.45	units	44	mm Hg
10326584	63	F	WHITE	88.65	163	Medicaid	English	DIVORCED	CCU	23.04	K/uL	3.84	m/uL	15.47	K/uL	2.14	K/uL	385	K/uL	10.08	g/dL	17.82	%	33.96	%	3.7	g/dL	NULL	NULL	NULL	NULL	137.67	mEq/L	4.63	mEq/L	8.9	mg/dL	99	mEq/L	168.67	mg/dL	NULL	NULL	12.5	mEq/L	7.32	units	55.4	mm Hg
10330086	47	F	WHITE	81.8	NULL	Medicaid	English	SINGLE	Neuro Stepdown	11.7	K/uL	4.61	m/uL	9.64	K/uL	1.18	K/uL	247.5	K/uL	12.2	g/dL	19.25	%	37.55	%	3.75	g/dL	NULL	NULL	NULL	NULL	135	mEq/L	3.9	mEq/L	9	mg/dL	102.5	mEq/L	103.5	mg/dL	5.3	%	17.5	mEq/L	NULL	NULL	NULL	NULL
10333449	97	M	BLACK/CAPE VERDEAN	51.6	NULL	Medicaid	Kabuverdianu	SINGLE	CVICU	8.7	K/uL	5.32	m/uL	NULL	NULL	NULL	NULL	200	K/uL	14.1	g/dL	13.6	%	44.6	%	NULL	NULL	NULL	NULL	NULL	NULL	140	mEq/L	4.2	mEq/L	9.5	mg/dL	103	mEq/L	104	mg/dL	NULL	NULL	11	mEq/L	NULL	NULL	NULL	NULL
10337521	81	M	WHITE	72.5	170	Medicare	English	MARRIED	MICU	18.07	K/uL	3.72	m/uL	14.14	K/uL	0.33	K/uL	95.33	K/uL	10.77	g/dL	15.83	%	34.77	%	2	g/dL	NULL	NULL	NULL	NULL	131.25	mEq/L	5.25	mEq/L	7.65	mg/dL	99.25	mEq/L	81	mg/dL	NULL	NULL	20	mEq/L	7.2	units	46.5	mm Hg
10338515	53	M	WHITE	169	NULL	Other	English	MARRIED	MICU	14.4	K/uL	3.58	m/uL	NULL	NULL	NULL	NULL	229	K/uL	9.1	g/dL	20.2	%	31.6	%	3.4	g/dL	NULL	NULL	NULL	NULL	140	mEq/L	4.1	mEq/L	8.6	mg/dL	101	mEq/L	227	mg/dL	NULL	NULL	15	mEq/L	7.26	units	63	mm Hg
10339317	67	M	WHITE	79.8	191	Medicare	English	SINGLE	MICU	8.9	K/uL	1.98	m/uL	NULL	NULL	NULL	NULL	147	K/uL	6.2	g/dL	19.3	%	19.2	%	NULL	NULL	NULL	NULL	5.5	g/dL	137.33	mEq/L	4.77	mEq/L	8.23	mg/dL	102.67	mEq/L	128.67	mg/dL	NULL	NULL	17.33	mEq/L	7.35	units	33	mm Hg
10343007	86	F	WHITE	60.9	NULL	Medicare	English	WIDOWED	MICU/SICU	14.2	K/uL	3.53	m/uL	11.14	K/uL	2.22	K/uL	318	K/uL	10.1	g/dL	15.73	%	30.87	%	NULL	NULL	NULL	NULL	NULL	NULL	147.5	mEq/L	3.95	mEq/L	8.1	mg/dL	109.5	mEq/L	72	mg/dL	NULL	NULL	14.5	mEq/L	7.38	units	44	mm Hg
10343369	83	M	WHITE	56.0667	175	Medicare	English	MARRIED	TSICU	1.07	K/uL	2.75	m/uL	0.86	K/uL	0.16	K/uL	105.33	K/uL	7.93	g/dL	17.5	%	25.73	%	2.8	g/dL	NULL	NULL	NULL	NULL	142.5	mEq/L	4.6	mEq/L	6.1	mg/dL	114.5	mEq/L	98	mg/dL	NULL	NULL	9.5	mEq/L	7.38	units	34.5	mm Hg
10344614	46	F	WHITE	104.3	NULL	Medicaid	English	SINGLE	MICU	20.45	K/uL	4.54	m/uL	NULL	NULL	NULL	NULL	360.5	K/uL	12	g/dL	14.1	%	37.45	%	NULL	NULL	NULL	NULL	NULL	NULL	141	mEq/L	2.4	mEq/L	8	mg/dL	102	mEq/L	154.5	mg/dL	NULL	NULL	13	mEq/L	7.45	units	44	mm Hg
10347400	91	F	WHITE	84.5	NULL	Medicare	English	SINGLE	MICU/SICU	7	K/uL	3.7	m/uL	NULL	NULL	NULL	NULL	120	K/uL	11.7	g/dL	15.6	%	39.3	%	NULL	NULL	NULL	NULL	NULL	NULL	147	mEq/L	5.4	mEq/L	8.5	mg/dL	101	mEq/L	112	mg/dL	NULL	NULL	12	mEq/L	7.27	units	84.67	mm Hg
10347653	66	M	WHITE	84.6	NULL	Medicare	English	MARRIED	SICU	12.6	K/uL	4.02	m/uL	NULL	NULL	NULL	NULL	271	K/uL	11.8	g/dL	13	%	37	%	3.25	g/dL	NULL	NULL	NULL	NULL	141	mEq/L	4	mEq/L	8.65	mg/dL	105	mEq/L	142	mg/dL	NULL	NULL	10	mEq/L	7.39	units	39	mm Hg
10348025	78	M	WHITE - OTHER EUROPEAN	78.8	NULL	Medicare	English	MARRIED	CCU	10.8	K/uL	4.7	m/uL	7.14	K/uL	0.85	K/uL	259	K/uL	13.55	g/dL	13.3	%	42.5	%	4.15	g/dL	NULL	NULL	NULL	NULL	139	mEq/L	4.2	mEq/L	9.55	mg/dL	99.5	mEq/L	124	mg/dL	NULL	NULL	9	mEq/L	NULL	NULL	NULL	NULL
10349208	64	F	WHITE - OTHER EUROPEAN	43	NULL	Medicaid	English	WIDOWED	SICU	9	K/uL	3.02	m/uL	NULL	NULL	NULL	NULL	465.5	K/uL	8.95	g/dL	16.2	%	29.2	%	NULL	NULL	NULL	NULL	NULL	NULL	138.5	mEq/L	4.45	mEq/L	8.35	mg/dL	104	mEq/L	91.5	mg/dL	NULL	NULL	10	mEq/L	NULL	NULL	NULL	NULL
10352828	71	F	UNKNOWN	68	170	Medicare	English	NULL	CVICU	9.13	K/uL	3.11	m/uL	7.66	K/uL	0.91	K/uL	154.5	K/uL	9.68	g/dL	13.08	%	28.57	%	NULL	NULL	NULL	NULL	NULL	NULL	139	mEq/L	4.7	mEq/L	NULL	NULL	105	mEq/L	112	mg/dL	4.9	%	9.5	mEq/L	7.37	units	47.79	mm Hg
10361914	58	F	WHITE	130.26	165	Private	English	MARRIED	TSICU	14.26	K/uL	3.56	m/uL	9.9	K/uL	0.5	K/uL	93.8	K/uL	11.64	g/dL	15.04	%	36.14	%	2.3	g/dL	NULL	NULL	NULL	NULL	129.4	mEq/L	6.12	mEq/L	6.8	mg/dL	96.8	mEq/L	101.2	mg/dL	NULL	NULL	21.2	mEq/L	7.17	units	37.23	mm Hg
10362003	84	F	WHITE	63.2	NULL	Medicare	English	SINGLE	MICU	12.7	K/uL	3.92	m/uL	NULL	NULL	NULL	NULL	255	K/uL	11.6	g/dL	13.8	%	37.2	%	2.6	g/dL	NULL	NULL	NULL	NULL	143	mEq/L	4.7	mEq/L	8.5	mg/dL	108	mEq/L	106	mg/dL	NULL	NULL	15	mEq/L	NULL	NULL	NULL	NULL
10371197	74	F	WHITE	69.8	155	Medicare	English	MARRIED	CVICU	11	K/uL	3.01	m/uL	7.84	K/uL	2.67	K/uL	118.33	K/uL	8.7	g/dL	13.57	%	26.85	%	NULL	NULL	NULL	NULL	NULL	NULL	138.33	mEq/L	4.17	mEq/L	8.2	mg/dL	107.67	mEq/L	96	mg/dL	NULL	NULL	12	mEq/L	7.38	units	44.25	mm Hg
10373014	86	M	UNKNOWN	49.9	160	Medicare	English	NULL	Neuro SICU	17.3	K/uL	3.49	m/uL	20.07	K/uL	0.45	K/uL	143	K/uL	10.9	g/dL	13.55	%	34.8	%	3.8	g/dL	NULL	NULL	NULL	NULL	144.67	mEq/L	5.43	mEq/L	8.77	mg/dL	101.67	mEq/L	144	mg/dL	5.1	%	18	mEq/L	7.4	units	46	mm Hg
10380095	63	F	WHITE	76.7	152	Medicare	English	WIDOWED	CCU	6.35	K/uL	4.39	m/uL	4.87	K/uL	0.72	K/uL	193.5	K/uL	12.25	g/dL	16.7	%	39.6	%	3.65	g/dL	NULL	NULL	NULL	NULL	138.5	mEq/L	3.8	mEq/L	9.05	mg/dL	99.5	mEq/L	147	mg/dL	NULL	NULL	11	mEq/L	7.41	units	46	mm Hg
10380616	82	F	WHITE	61.9	NULL	Medicare	English	SINGLE	TSICU	7.05	K/uL	4.07	m/uL	NULL	NULL	NULL	NULL	152	K/uL	9.6	g/dL	17.35	%	31.9	%	NULL	NULL	NULL	NULL	NULL	NULL	139	mEq/L	4.5	mEq/L	8.4	mg/dL	104	mEq/L	123	mg/dL	NULL	NULL	13.5	mEq/L	7.33	units	52.5	mm Hg
10381880	65	F	WHITE	98.5667	150	Medicare	English	DIVORCED	TSICU	14.7	K/uL	4.61	m/uL	NULL	NULL	NULL	NULL	210	K/uL	13	g/dL	15.95	%	40.7	%	NULL	NULL	NULL	NULL	NULL	NULL	142.5	mEq/L	4	mEq/L	8.6	mg/dL	110	mEq/L	137	mg/dL	NULL	NULL	12.5	mEq/L	7.27	units	54.89	mm Hg
10386060	74	M	WHITE	108.7	178	Medicare	English	MARRIED	CVICU	5.9	K/uL	4.62	m/uL	NULL	NULL	NULL	NULL	136	K/uL	12.7	g/dL	13.7	%	40	%	NULL	NULL	NULL	NULL	NULL	NULL	141.5	mEq/L	4.13	mEq/L	8.3	mg/dL	104.5	mEq/L	104	mg/dL	NULL	NULL	12.5	mEq/L	7.39	units	NULL	NULL
10390100	71	F	WHITE	100.5	NULL	Medicare	English	MARRIED	MICU	10.34	K/uL	2.34	m/uL	8.45	K/uL	0.38	K/uL	87.6	K/uL	7.22	g/dL	15.46	%	22.18	%	NULL	NULL	NULL	NULL	NULL	NULL	136	mEq/L	4.5	mEq/L	8.4	mg/dL	106.67	mEq/L	144.33	mg/dL	NULL	NULL	13.33	mEq/L	7.27	units	44.67	mm Hg
10394127	73	F	WHITE	53.5	NULL	Medicare	English	DIVORCED	Neuro Intermediate	NULL	NULL	NULL	NULL	NULL	NULL	NULL	NULL	NULL	NULL	NULL	NULL	NULL	NULL	NULL	NULL	NULL	NULL	NULL	NULL	NULL	NULL	NULL	NULL	NULL	NULL	NULL	NULL	NULL	NULL	NULL	NULL	NULL	NULL	NULL	NULL	NULL	NULL	NULL	NULL
10402649	60	F	WHITE	93.8	170	Medicaid	English	DIVORCED	CVICU	10.5	K/uL	3.59	m/uL	5.06	K/uL	3.99	K/uL	104.67	K/uL	11.48	g/dL	12.07	%	33.04	%	NULL	NULL	NULL	NULL	NULL	NULL	140	mEq/L	3.8	mEq/L	8.9	mg/dL	104.5	mEq/L	104	mg/dL	NULL	NULL	13.5	mEq/L	7.43	units	38.75	mm Hg
10403474	85	F	UNKNOWN	73.5	NULL	Private	English	WIDOWED	Neuro Intermediate	7.7	K/uL	3.78	m/uL	NULL	NULL	NULL	NULL	189	K/uL	10.4	g/dL	13.5	%	32.9	%	NULL	NULL	NULL	NULL	NULL	NULL	142	mEq/L	4	mEq/L	9.2	mg/dL	104	mEq/L	118	mg/dL	NULL	NULL	13	mEq/L	NULL	NULL	NULL	NULL
10406253	70	M	WHITE	98.6	NULL	Medicare	English	MARRIED	TSICU	7.65	K/uL	3.74	m/uL	NULL	NULL	NULL	NULL	144	K/uL	12.7	g/dL	15.5	%	37.55	%	NULL	NULL	NULL	NULL	NULL	NULL	136.5	mEq/L	4.7	mEq/L	7.9	mg/dL	101.5	mEq/L	118	mg/dL	NULL	NULL	12.5	mEq/L	7.34	units	44	mm Hg
10415643	79	F	WHITE	76.3	155	Medicare	English	MARRIED	MICU/SICU	29.4	K/uL	3.81	m/uL	NULL	NULL	NULL	NULL	148	K/uL	11.1	g/dL	13.5	%	36.9	%	NULL	NULL	NULL	NULL	NULL	NULL	139.5	mEq/L	4.65	mEq/L	7.45	mg/dL	102	mEq/L	135.5	mg/dL	NULL	NULL	16	mEq/L	7.32	units	50.43	mm Hg
10416061	74	M	OTHER	90.25	175	Medicare	English	MARRIED	CVICU	8.1	K/uL	3.07	m/uL	NULL	NULL	NULL	NULL	159.5	K/uL	8.8	g/dL	17.45	%	27.6	%	NULL	NULL	NULL	NULL	NULL	NULL	139.5	mEq/L	3.75	mEq/L	9.1	mg/dL	103	mEq/L	94.5	mg/dL	NULL	NULL	15	mEq/L	NULL	NULL	NULL	NULL
10416103	63	M	WHITE	123.6	NULL	Private	English	MARRIED	CVICU	9.53	K/uL	4.75	m/uL	NULL	NULL	NULL	NULL	188	K/uL	15.53	g/dL	14.63	%	47.8	%	NULL	NULL	NULL	NULL	NULL	NULL	134	mEq/L	4.85	mEq/L	9.5	mg/dL	102	mEq/L	112	mg/dL	NULL	NULL	16	mEq/L	NULL	NULL	NULL	NULL
10417428	73	M	UNABLE TO OBTAIN	103	178	Medicare	English	SINGLE	CVICU	17.5	K/uL	2.85	m/uL	15.42	K/uL	1.66	K/uL	207.25	K/uL	8.43	g/dL	14.13	%	25.48	%	NULL	NULL	NULL	NULL	NULL	NULL	139	mEq/L	4.45	mEq/L	7.3	mg/dL	108.67	mEq/L	146	mg/dL	NULL	NULL	11.33	mEq/L	7.33	units	40.38	mm Hg
10419638	54	F	WHITE	70.2	NULL	Private	English	DIVORCED	Neuro SICU	17.7	K/uL	3.09	m/uL	NULL	NULL	NULL	NULL	219	K/uL	10.25	g/dL	13.1	%	32.4	%	3.13	g/dL	NULL	NULL	NULL	NULL	138	mEq/L	4	mEq/L	8.13	mg/dL	100.33	mEq/L	125	mg/dL	NULL	NULL	13.33	mEq/L	7.4	units	42	mm Hg
10423286	55	M	WHITE	112.5	183	Private	English	MARRIED	CCU	13.4	K/uL	3.89	m/uL	8.89	K/uL	1.22	K/uL	254	K/uL	12.1	g/dL	16	%	36.7	%	3.5	g/dL	NULL	NULL	NULL	NULL	132.5	mEq/L	6.15	mEq/L	8.55	mg/dL	97	mEq/L	143	mg/dL	NULL	NULL	11.5	mEq/L	7.41	units	37.75	mm Hg
10424018	63	M	WHITE	144.2	183	Private	English	DIVORCED	TSICU	15.6	K/uL	4.3	m/uL	16.72	K/uL	0.41	K/uL	218.5	K/uL	13.55	g/dL	13.13	%	40.48	%	NULL	NULL	NULL	NULL	NULL	NULL	140.6	mEq/L	5.24	mEq/L	8.58	mg/dL	104.2	mEq/L	162	mg/dL	NULL	NULL	12.4	mEq/L	7.24	units	59.3	mm Hg
10426990	84	F	WHITE	93.4	NULL	Medicare	English	DIVORCED	CVICU	9.7	K/uL	4.84	m/uL	NULL	NULL	NULL	NULL	166	K/uL	14	g/dL	16.2	%	48	%	NULL	NULL	NULL	NULL	NULL	NULL	145.5	mEq/L	3.7	mEq/L	9.05	mg/dL	97	mEq/L	120.5	mg/dL	NULL	NULL	11.5	mEq/L	7.35	units	80	mm Hg
10430776	71	M	WHITE	87.55	173	Medicare	English	SINGLE	MICU	10.64	K/uL	4.1	m/uL	8.47	K/uL	1.23	K/uL	44.2	K/uL	10.16	g/dL	20.22	%	33.36	%	3.1	g/dL	2.1	g/dL	5	g/dL	143	mEq/L	3.63	mEq/L	8.1	mg/dL	96.33	mEq/L	94.33	mg/dL	NULL	NULL	10.33	mEq/L	7.42	units	60.25	mm Hg
10433353	73	F	BLACK/AFRICAN AMERICAN	54	NULL	Medicare	English	MARRIED	TSICU	4.1	K/uL	4.01	m/uL	NULL	NULL	NULL	NULL	362	K/uL	10.7	g/dL	14.8	%	38.8	%	NULL	NULL	NULL	NULL	NULL	NULL	144.5	mEq/L	6.05	mEq/L	9.2	mg/dL	99.5	mEq/L	194.5	mg/dL	NULL	NULL	10.5	mEq/L	7.29	units	76.5	mm Hg
10438785	63	M	WHITE	120	NULL	Private	English	MARRIED	TSICU	10.8	K/uL	3.73	m/uL	NULL	NULL	NULL	NULL	210	K/uL	12.2	g/dL	13.85	%	38.5	%	NULL	NULL	NULL	NULL	NULL	NULL	134.5	mEq/L	4.7	mEq/L	8.5	mg/dL	99	mEq/L	122.5	mg/dL	NULL	NULL	7.5	mEq/L	NULL	NULL	NULL	NULL
10438899	72	F	WHITE	120.9	NULL	Medicare	English	WIDOWED	Neuro Intermediate	9.7	K/uL	4.69	m/uL	6.8	K/uL	1.37	K/uL	240	K/uL	13.9	g/dL	13.1	%	43.3	%	4	g/dL	NULL	NULL	NULL	NULL	145	mEq/L	3.6	mEq/L	9.2	mg/dL	103	mEq/L	116	mg/dL	5.9	%	15	mEq/L	NULL	NULL	NULL	NULL
10439110	56	F	WHITE	71	155	Medicaid	English	SINGLE	CCU	40.45	K/uL	3.54	m/uL	34.02	K/uL	4.02	K/uL	410.5	K/uL	7.9	g/dL	18.25	%	27.95	%	3	g/dL	NULL	NULL	NULL	NULL	132	mEq/L	5.4	mEq/L	9.7	mg/dL	95	mEq/L	664.5	mg/dL	NULL	NULL	20.5	mEq/L	7.07	units	60.25	mm Hg
10439374	65	M	WHITE	108.1	NULL	Medicare	English	SINGLE	MICU	5.34	K/uL	2.49	m/uL	NULL	NULL	NULL	NULL	75.8	K/uL	7.08	g/dL	18.26	%	21.8	%	NULL	NULL	NULL	NULL	NULL	NULL	136	mEq/L	4.03	mEq/L	7.53	mg/dL	105.33	mEq/L	153.67	mg/dL	NULL	NULL	12.33	mEq/L	7.45	units	34.5	mm Hg
10441335	65	M	WHITE	75.25	173	Private	English	MARRIED	CCU	13.6	K/uL	2.74	m/uL	10.2	K/uL	0.7	K/uL	131.67	K/uL	8.67	g/dL	17.57	%	26.73	%	1.85	g/dL	NULL	NULL	NULL	NULL	138.33	mEq/L	5.37	mEq/L	6.87	mg/dL	95.67	mEq/L	129.33	mg/dL	NULL	NULL	31.67	mEq/L	7.22	units	24.83	mm Hg
10451487	92	F	WHITE	68.05	152	Medicare	English	DIVORCED	CCU	13.23	K/uL	3.07	m/uL	9.79	K/uL	1.03	K/uL	140.33	K/uL	9.33	g/dL	14.07	%	29.5	%	3.4	g/dL	NULL	NULL	NULL	NULL	133.75	mEq/L	4.53	mEq/L	8.68	mg/dL	98.25	mEq/L	139	mg/dL	NULL	NULL	16.25	mEq/L	7.37	units	45	mm Hg
10454216	65	M	WHITE	69	NULL	Private	English	MARRIED	TSICU	10.32	K/uL	2.64	m/uL	NULL	NULL	NULL	NULL	279.2	K/uL	8.64	g/dL	13.62	%	26.5	%	NULL	NULL	NULL	NULL	NULL	NULL	124.8	mEq/L	5.37	mEq/L	8.52	mg/dL	94.2	mEq/L	97.8	mg/dL	NULL	NULL	11.4	mEq/L	NULL	NULL	NULL	NULL
10455482	59	M	WHITE	84.5	183	Medicare	English	DIVORCED	CCU	19.35	K/uL	2.58	m/uL	NULL	NULL	NULL	NULL	122	K/uL	7.25	g/dL	16.4	%	21.98	%	2.9	g/dL	NULL	NULL	NULL	NULL	137	mEq/L	3.87	mEq/L	7.2	mg/dL	102	mEq/L	147	mg/dL	NULL	NULL	12.33	mEq/L	NULL	NULL	NULL	NULL
10464753	87	M	UNABLE TO OBTAIN	110	NULL	Medicare	English	MARRIED	PACU	19.3	K/uL	3.95	m/uL	NULL	NULL	NULL	NULL	295	K/uL	9.6	g/dL	19.4	%	31.1	%	NULL	NULL	NULL	NULL	NULL	NULL	134	mEq/L	5.1	mEq/L	8.6	mg/dL	102	mEq/L	134	mg/dL	NULL	NULL	11	mEq/L	NULL	NULL	NULL	NULL
10468318	66	M	WHITE	99.6	NULL	Private	English	DIVORCED	TSICU	18.05	K/uL	4.72	m/uL	NULL	NULL	NULL	NULL	212.25	K/uL	15.18	g/dL	12.73	%	44.68	%	NULL	NULL	NULL	NULL	NULL	NULL	138.5	mEq/L	4.15	mEq/L	8.28	mg/dL	107	mEq/L	148	mg/dL	NULL	NULL	9.75	mEq/L	7.31	units	43	mm Hg
10473091	39	M	UNKNOWN	116	183	Medicaid	English	NULL	MICU	16.95	K/uL	4.67	m/uL	13.66	K/uL	1.1	K/uL	275	K/uL	12.35	g/dL	15.45	%	39.45	%	NULL	NULL	NULL	NULL	NULL	NULL	138	mEq/L	4.45	mEq/L	8.2	mg/dL	107.5	mEq/L	154	mg/dL	NULL	NULL	12	mEq/L	7.21	units	54	mm Hg
10481270	66	M	WHITE	70.7	NULL	Medicare	English	MARRIED	MICU	9.3	K/uL	4.38	m/uL	NULL	NULL	NULL	NULL	374	K/uL	13.4	g/dL	12.7	%	40.3	%	NULL	NULL	NULL	NULL	NULL	NULL	137.5	mEq/L	4.5	mEq/L	9.7	mg/dL	101	mEq/L	119	mg/dL	NULL	NULL	13	mEq/L	NULL	NULL	NULL	NULL
10485315	81	M	WHITE	62.4	NULL	Medicare	English	WIDOWED	CCU	5.9	K/uL	3.39	m/uL	NULL	NULL	NULL	NULL	110	K/uL	10.83	g/dL	15.1	%	33.03	%	3.35	g/dL	NULL	NULL	NULL	NULL	139	mEq/L	4.05	mEq/L	8.5	mg/dL	96	mEq/L	133.75	mg/dL	NULL	NULL	11.25	mEq/L	7.42	units	52	mm Hg
10485328	56	M	WHITE	106.35	180	Medicare	English	MARRIED	MICU	11.8	K/uL	4.46	m/uL	11.37	K/uL	0.19	K/uL	222	K/uL	11.75	g/dL	13.7	%	37.05	%	2.4	g/dL	NULL	NULL	NULL	NULL	130.25	mEq/L	4.78	mEq/L	8.13	mg/dL	98	mEq/L	184.25	mg/dL	NULL	NULL	14.75	mEq/L	7.27	units	42.86	mm Hg
10486056	84	F	WHITE	63	163	Medicare	English	DIVORCED	MICU	24.55	K/uL	2.15	m/uL	22.24	K/uL	0.23	K/uL	262.75	K/uL	7.25	g/dL	21	%	22.53	%	3.05	g/dL	NULL	NULL	NULL	NULL	134.33	mEq/L	3.9	mEq/L	8.17	mg/dL	90.67	mEq/L	115.33	mg/dL	NULL	NULL	12.33	mEq/L	7.44	units	50	mm Hg
10488182	73	F	WHITE	62.4	157	Medicare	English	DIVORCED	MICU	13.1	K/uL	3.46	m/uL	10.34	K/uL	0.84	K/uL	396	K/uL	8.6	g/dL	18.85	%	29.9	%	NULL	NULL	NULL	NULL	NULL	NULL	134	mEq/L	4.35	mEq/L	9.3	mg/dL	85	mEq/L	94.5	mg/dL	NULL	NULL	10	mEq/L	7.35	units	85.33	mm Hg
10492274	45	M	WHITE	97.25	178	Private	English	NULL	MICU/SICU	NULL	NULL	NULL	NULL	NULL	NULL	NULL	NULL	NULL	NULL	NULL	NULL	NULL	NULL	NULL	NULL	NULL	NULL	NULL	NULL	NULL	NULL	NULL	NULL	NULL	NULL	NULL	NULL	NULL	NULL	NULL	NULL	NULL	NULL	NULL	NULL	NULL	NULL	NULL	NULL
10495206	86	M	WHITE	48	NULL	Medicare	English	MARRIED	SICU	15.57	K/uL	2.89	m/uL	NULL	NULL	NULL	NULL	123	K/uL	9.03	g/dL	16.03	%	28.53	%	3.6	g/dL	NULL	NULL	NULL	NULL	150	mEq/L	3.87	mEq/L	8.27	mg/dL	110.33	mEq/L	131.33	mg/dL	NULL	NULL	10.67	mEq/L	7.29	units	64.56	mm Hg
10496518	42	F	UNKNOWN	120.95	160	Medicaid	English	SINGLE	CVICU	14.15	K/uL	3.18	m/uL	10.39	K/uL	1.34	K/uL	382.25	K/uL	9.7	g/dL	14.98	%	30.58	%	NULL	NULL	NULL	NULL	NULL	NULL	137	mEq/L	4.83	mEq/L	8.1	mg/dL	100.33	mEq/L	93.5	mg/dL	NULL	NULL	9.33	mEq/L	7.38	units	49	mm Hg
10498701	84	F	WHITE	57.5	145	Medicare	English	SINGLE	MICU	7.2	K/uL	2.52	m/uL	NULL	NULL	NULL	NULL	208	K/uL	7.8	g/dL	15.35	%	26.9	%	NULL	NULL	NULL	NULL	NULL	NULL	140	mEq/L	5.5	mEq/L	10.3	mg/dL	105.75	mEq/L	217	mg/dL	NULL	NULL	18.25	mEq/L	7.25	units	41.5	mm Hg
10499409	72	M	UNKNOWN	231.5	183	Medicare	English	MARRIED	MICU/SICU	10.1	K/uL	4.61	m/uL	NULL	NULL	NULL	NULL	218	K/uL	13.4	g/dL	15.2	%	39.9	%	3.2	g/dL	NULL	NULL	NULL	NULL	131.33	mEq/L	3.93	mEq/L	9	mg/dL	85	mEq/L	106	mg/dL	NULL	NULL	15.33	mEq/L	7.38	units	73.17	mm Hg
10503322	68	F	WHITE	92	NULL	Medicare	English	MARRIED	SICU	8.4	K/uL	3.93	m/uL	NULL	NULL	NULL	NULL	143	K/uL	12	g/dL	13.8	%	36.8	%	3.2	g/dL	NULL	NULL	NULL	NULL	137	mEq/L	5.3	mEq/L	8.6	mg/dL	104	mEq/L	130	mg/dL	NULL	NULL	13	mEq/L	NULL	NULL	NULL	NULL
10510314	87	F	WHITE	56	NULL	Medicare	English	WIDOWED	CCU	10	K/uL	3.17	m/uL	NULL	NULL	NULL	NULL	259	K/uL	8.8	g/dL	13.5	%	27.4	%	NULL	NULL	NULL	NULL	NULL	NULL	142.5	mEq/L	4.35	mEq/L	8.05	mg/dL	111.5	mEq/L	101	mg/dL	NULL	NULL	14.5	mEq/L	NULL	NULL	NULL	NULL
10516725	64	M	UNKNOWN	101.4	NULL	Medicare	English	SINGLE	Neuro Intermediate	8.4	K/uL	4.04	m/uL	NULL	NULL	NULL	NULL	234	K/uL	12.6	g/dL	13	%	37.1	%	NULL	NULL	NULL	NULL	NULL	NULL	138	mEq/L	4.2	mEq/L	8.1	mg/dL	102	mEq/L	87	mg/dL	NULL	NULL	13	mEq/L	NULL	NULL	NULL	NULL
10524327	81	F	WHITE	95.2	157	Medicare	English	WIDOWED	CVICU	13.03	K/uL	4.09	m/uL	NULL	NULL	NULL	NULL	217.33	K/uL	12.47	g/dL	12.8	%	35.73	%	NULL	NULL	NULL	NULL	NULL	NULL	138	mEq/L	3.9	mEq/L	8.45	mg/dL	104	mEq/L	142	mg/dL	NULL	NULL	15.5	mEq/L	NULL	NULL	NULL	NULL
10526039	84	F	UNKNOWN	70	152	Medicare	English	NULL	MICU	22.19	K/uL	2.75	m/uL	17.93	K/uL	1.54	K/uL	82.57	K/uL	8.31	g/dL	14.69	%	25.49	%	1.95	g/dL	NULL	NULL	NULL	NULL	147.29	mEq/L	3.89	mEq/L	8.14	mg/dL	106.29	mEq/L	185.57	mg/dL	NULL	NULL	16.14	mEq/L	7.21	units	73.75	mm Hg
10529348	79	M	WHITE	88	170	Medicare	English	MARRIED	TSICU	15.9	K/uL	4.02	m/uL	NULL	NULL	NULL	NULL	176.33	K/uL	12.9	g/dL	17.07	%	40.9	%	NULL	NULL	NULL	NULL	NULL	NULL	140	mEq/L	3.93	mEq/L	8.1	mg/dL	100.33	mEq/L	242	mg/dL	NULL	NULL	16	mEq/L	7.34	units	46.4	mm Hg
10532095	51	M	WHITE	97.9	175	Medicare	English	DIVORCED	MICU	11.83	K/uL	1.92	m/uL	NULL	NULL	NULL	NULL	64.67	K/uL	7.03	g/dL	20.1	%	21.8	%	NULL	NULL	NULL	NULL	NULL	NULL	128.5	mEq/L	3.85	mEq/L	9	mg/dL	91.5	mEq/L	153.5	mg/dL	NULL	NULL	17	mEq/L	7.42	units	41	mm Hg
10532466	87	F	BLACK/AFRICAN AMERICAN	78.5	163	Medicare	English	MARRIED	MICU	6.5	K/uL	3.5	m/uL	NULL	NULL	NULL	NULL	101	K/uL	10	g/dL	19.9	%	33.9	%	3.9	g/dL	NULL	NULL	NULL	NULL	140	mEq/L	4.93	mEq/L	9.57	mg/dL	96	mEq/L	122.33	mg/dL	NULL	NULL	15.67	mEq/L	7.26	units	73.5	mm Hg
10534155	91	M	UNKNOWN	50.2	NULL	NULL	English	NULL	MICU/SICU	25.5	K/uL	2.45	m/uL	24.27	K/uL	0.32	K/uL	148	K/uL	8.8	g/dL	18.8	%	24.3	%	NULL	NULL	NULL	NULL	NULL	NULL	134	mEq/L	3.6	mEq/L	5.3	mg/dL	93	mEq/L	105	mg/dL	NULL	NULL	36	mEq/L	7.43	units	18	mm Hg
10541842	69	M	WHITE	106.6	NULL	Medicare	English	MARRIED	MICU	3.9	K/uL	4.19	m/uL	3.32	K/uL	0.31	K/uL	127	K/uL	13.7	g/dL	14.7	%	39.9	%	NULL	NULL	NULL	NULL	NULL	NULL	141	mEq/L	4	mEq/L	8.6	mg/dL	102	mEq/L	186	mg/dL	NULL	NULL	15	mEq/L	7.39	units	45	mm Hg
10546272	76	F	WHITE	68	NULL	Medicare	English	MARRIED	Neuro Intermediate	9.25	K/uL	3.47	m/uL	NULL	NULL	NULL	NULL	263.5	K/uL	10.4	g/dL	13.4	%	32.05	%	NULL	NULL	NULL	NULL	NULL	NULL	145	mEq/L	4	mEq/L	7.6	mg/dL	107	mEq/L	86	mg/dL	NULL	NULL	11	mEq/L	NULL	NULL	NULL	NULL
10551762	71	M	WHITE	78.8	170	Medicare	English	SINGLE	CCU	6.1	K/uL	3.77	m/uL	NULL	NULL	NULL	NULL	223	K/uL	10.1	g/dL	20.2	%	34.8	%	NULL	NULL	NULL	NULL	NULL	NULL	140.33	mEq/L	4.5	mEq/L	8.63	mg/dL	95.67	mEq/L	120	mg/dL	NULL	NULL	13.67	mEq/L	7.29	units	77.5	mm Hg
10552083	68	M	UNKNOWN	89.6	178	Medicaid	English	NULL	TSICU	16.5	K/uL	4.62	m/uL	16.9	K/uL	1.3	K/uL	135.67	K/uL	14.27	g/dL	14.6	%	45.23	%	3.6	g/dL	NULL	NULL	NULL	NULL	136.33	mEq/L	5.73	mEq/L	9.17	mg/dL	106.33	mEq/L	139	mg/dL	NULL	NULL	10	mEq/L	7.31	units	44.5	mm Hg
10559489	78	M	BLACK/CARIBBEAN ISLAND	91	183	Medicare	English	MARRIED	MICU	12.57	K/uL	2.91	m/uL	12.44	K/uL	1.26	K/uL	236.67	K/uL	7.33	g/dL	18.67	%	25.23	%	NULL	NULL	NULL	NULL	NULL	NULL	144	mEq/L	4	mEq/L	8.7	mg/dL	106	mEq/L	166.33	mg/dL	NULL	NULL	11.33	mEq/L	7.42	units	42	mm Hg
10564547	92	F	WHITE	35.7	NULL	Medicare	English	DIVORCED	CCU	23.6	K/uL	3.33	m/uL	27.47	K/uL	0.57	K/uL	174	K/uL	10.2	g/dL	15.15	%	33.4	%	4	g/dL	NULL	NULL	NULL	NULL	145	mEq/L	3.95	mEq/L	8.65	mg/dL	104.5	mEq/L	94.5	mg/dL	NULL	NULL	14	mEq/L	7.29	units	61.6	mm Hg
10566618	55	M	BLACK/AFRICAN AMERICAN	75	175	Medicare	English	SINGLE	SICU	10.19	K/uL	2.83	m/uL	NULL	NULL	NULL	NULL	76.79	K/uL	8.59	g/dL	17.68	%	26.05	%	2.86	g/dL	NULL	NULL	NULL	NULL	139	mEq/L	5.49	mEq/L	8.96	mg/dL	106.43	mEq/L	200.71	mg/dL	NULL	NULL	13.29	mEq/L	7.3	units	38.5	mm Hg
10569676	85	F	WHITE	85.3	NULL	Medicare	English	DIVORCED	TSICU	11.5	K/uL	3.48	m/uL	NULL	NULL	NULL	NULL	194	K/uL	10.6	g/dL	13.2	%	34.2	%	NULL	NULL	NULL	NULL	NULL	NULL	134.5	mEq/L	4.55	mEq/L	7.9	mg/dL	97.5	mEq/L	122.5	mg/dL	NULL	NULL	13.5	mEq/L	7.25	units	62	mm Hg
10573912	64	F	WHITE	44	173	Medicare	English	MARRIED	MICU	8.9	K/uL	2.99	m/uL	NULL	NULL	NULL	NULL	207.5	K/uL	9.25	g/dL	12.4	%	28.65	%	NULL	NULL	NULL	NULL	NULL	NULL	138	mEq/L	4.05	mEq/L	8.3	mg/dL	105	mEq/L	108.5	mg/dL	NULL	NULL	9	mEq/L	7.35	units	50	mm Hg
10583763	89	F	OTHER	66	152	Medicare	English	DIVORCED	MICU	6.7	K/uL	3.77	m/uL	NULL	NULL	NULL	NULL	141	K/uL	9.4	g/dL	17.4	%	30.7	%	NULL	NULL	NULL	NULL	NULL	NULL	140.33	mEq/L	4.7	mEq/L	8.63	mg/dL	101.67	mEq/L	135.33	mg/dL	NULL	NULL	16.33	mEq/L	7.35	units	50	mm Hg
10586065	76	M	WHITE	62.8	NULL	Medicare	English	MARRIED	MICU/SICU	8.17	K/uL	3.68	m/uL	5.68	K/uL	0.95	K/uL	167.33	K/uL	11.03	g/dL	13.47	%	34.1	%	3.2	g/dL	NULL	NULL	NULL	NULL	141.5	mEq/L	3.6	mEq/L	7.8	mg/dL	107.5	mEq/L	94.5	mg/dL	NULL	NULL	9	mEq/L	7.31	units	53.5	mm Hg
10586946	90	M	WHITE	64.5	163	Medicare	English	MARRIED	CVICU	11.85	K/uL	3	m/uL	9.79	K/uL	1.06	K/uL	118.5	K/uL	8.9	g/dL	13.18	%	28.6	%	NULL	NULL	NULL	NULL	NULL	NULL	136	mEq/L	4.55	mEq/L	8.2	mg/dL	105.67	mEq/L	95	mg/dL	NULL	NULL	14	mEq/L	7.4	units	36.67	mm Hg
10588464	64	F	WHITE	130	NULL	Other	English	MARRIED	MICU	5.1	K/uL	4.51	m/uL	NULL	NULL	NULL	NULL	184	K/uL	13.2	g/dL	13.2	%	41.9	%	4	g/dL	2.4	g/dL	6.4	g/dL	138	mEq/L	4.4	mEq/L	9.1	mg/dL	100	mEq/L	114	mg/dL	NULL	NULL	12	mEq/L	NULL	NULL	NULL	NULL
10590547	74	M	WHITE	77	NULL	Medicare	English	NULL	Neuro Intermediate	5.8	K/uL	3.4	m/uL	NULL	NULL	NULL	NULL	302	K/uL	11.4	g/dL	13.6	%	35.4	%	3.8	g/dL	NULL	NULL	NULL	NULL	138	mEq/L	4.5	mEq/L	8.9	mg/dL	105	mEq/L	84	mg/dL	NULL	NULL	17	mEq/L	NULL	NULL	NULL	NULL
10590693	82	M	WHITE	87.2667	173	Medicare	English	SINGLE	CCU	19.3	K/uL	4.29	m/uL	17.94	K/uL	0.61	K/uL	162.5	K/uL	12.9	g/dL	13.55	%	38.55	%	3.2	g/dL	NULL	NULL	NULL	NULL	143	mEq/L	4.03	mEq/L	7.3	mg/dL	108	mEq/L	146.33	mg/dL	NULL	NULL	13.67	mEq/L	7.42	units	34	mm Hg
10590809	61	M	BLACK/AFRICAN AMERICAN	107.2	183	Medicaid	English	SINGLE	MICU	NULL	NULL	NULL	NULL	NULL	NULL	NULL	NULL	NULL	NULL	NULL	NULL	NULL	NULL	NULL	NULL	NULL	NULL	NULL	NULL	NULL	NULL	NULL	NULL	NULL	NULL	NULL	NULL	NULL	NULL	NULL	NULL	NULL	NULL	NULL	NULL	NULL	NULL	NULL	NULL
10591267	58	M	WHITE	96.2	NULL	Medicare	English	SINGLE	Neuro Stepdown	10.4	K/uL	3.83	m/uL	NULL	NULL	NULL	NULL	325	K/uL	11.8	g/dL	15	%	37.4	%	NULL	NULL	NULL	NULL	NULL	NULL	133	mEq/L	4.3	mEq/L	8.9	mg/dL	96	mEq/L	88	mg/dL	NULL	NULL	12	mEq/L	NULL	NULL	NULL	NULL
10597337	63	M	WHITE	86	170	Medicaid	English	DIVORCED	CVICU	12.65	K/uL	4.43	m/uL	9.65	K/uL	1.73	K/uL	207	K/uL	14.55	g/dL	12.15	%	43.05	%	NULL	NULL	NULL	NULL	NULL	NULL	137.5	mEq/L	5.22	mEq/L	8.4	mg/dL	105.5	mEq/L	143	mg/dL	NULL	NULL	12.5	mEq/L	7.37	units	33.33	mm Hg
10599377	66	F	WHITE	88.3	NULL	Medicare	English	MARRIED	CCU	9	K/uL	3.73	m/uL	NULL	NULL	NULL	NULL	105	K/uL	11.1	g/dL	18.6	%	34.6	%	2.6	g/dL	NULL	NULL	NULL	NULL	143	mEq/L	3.1	mEq/L	7.9	mg/dL	111	mEq/L	75	mg/dL	NULL	NULL	12	mEq/L	NULL	NULL	NULL	NULL
10602639	73	M	WHITE	80.8	NULL	Medicare	English	MARRIED	MICU	10.2	K/uL	4.13	m/uL	7.06	K/uL	0.49	K/uL	147.5	K/uL	12.25	g/dL	16.6	%	39.55	%	NULL	NULL	NULL	NULL	5.5	g/dL	135.5	mEq/L	5.3	mEq/L	8.4	mg/dL	100	mEq/L	119.5	mg/dL	NULL	NULL	11	mEq/L	7.28	units	65	mm Hg
10603001	58	M	WHITE	104	NULL	Private	English	SINGLE	MICU	6.8	K/uL	5.51	m/uL	NULL	NULL	NULL	NULL	149	K/uL	16.5	g/dL	12.85	%	50.55	%	NULL	NULL	NULL	NULL	NULL	NULL	144	mEq/L	5.27	mEq/L	8.47	mg/dL	96.33	mEq/L	120.33	mg/dL	NULL	NULL	15.33	mEq/L	7.43	units	48	mm Hg
10607968	51	F	WHITE	100.5	NULL	Medicaid	English	MARRIED	MICU/SICU	9.9	K/uL	3.63	m/uL	5.67	K/uL	2.04	K/uL	193	K/uL	11.8	g/dL	15.35	%	36.7	%	NULL	NULL	NULL	NULL	NULL	NULL	142.5	mEq/L	4	mEq/L	8.7	mg/dL	105.5	mEq/L	108.5	mg/dL	NULL	NULL	11.5	mEq/L	NULL	NULL	NULL	NULL
10610928	63	M	WHITE	55.8	NULL	Private	English	MARRIED	MICU/SICU	8.7	K/uL	3.07	m/uL	NULL	NULL	NULL	NULL	212	K/uL	9.3	g/dL	13.37	%	29.17	%	2.93	g/dL	NULL	NULL	NULL	NULL	135	mEq/L	5.45	mEq/L	10.78	mg/dL	98.25	mEq/L	93.75	mg/dL	NULL	NULL	8	mEq/L	7.3	units	NULL	NULL
10614830	74	F	UNABLE TO OBTAIN	54.1	157	Medicare	English	NULL	CCU	72.1	K/uL	2.79	m/uL	70.98	K/uL	0.78	K/uL	316.33	K/uL	7.9	g/dL	19.03	%	25.93	%	NULL	NULL	NULL	NULL	NULL	NULL	125.25	mEq/L	5	mEq/L	7.6	mg/dL	88	mEq/L	126.75	mg/dL	NULL	NULL	18.75	mEq/L	7.4	units	36	mm Hg
10617176	94	F	HISPANIC/LATINO - DOMINICAN	54.1	152	Medicare	Spanish	WIDOWED	MICU/SICU	7.2	K/uL	3.48	m/uL	NULL	NULL	NULL	NULL	190	K/uL	7.4	g/dL	18.3	%	24.5	%	3.5	g/dL	NULL	NULL	NULL	NULL	124	mEq/L	4.6	mEq/L	8.4	mg/dL	87	mEq/L	138	mg/dL	NULL	NULL	11	mEq/L	7.29	units	59	mm Hg
10621627	64	F	WHITE	102	152	Private	English	MARRIED	CCU	5.4	K/uL	4.46	m/uL	NULL	NULL	NULL	NULL	97.5	K/uL	13	g/dL	17.8	%	40.75	%	NULL	NULL	NULL	NULL	NULL	NULL	139	mEq/L	3.57	mEq/L	9.1	mg/dL	94.33	mEq/L	105.67	mg/dL	NULL	NULL	15.33	mEq/L	7.5	units	42	mm Hg
10622130	82	M	WHITE	80	NULL	Medicare	English	SINGLE	Neuro SICU	NULL	NULL	NULL	NULL	NULL	NULL	NULL	NULL	NULL	NULL	NULL	NULL	NULL	NULL	NULL	NULL	NULL	NULL	NULL	NULL	NULL	NULL	NULL	NULL	NULL	NULL	NULL	NULL	NULL	NULL	NULL	NULL	NULL	NULL	NULL	NULL	NULL	NULL	NULL	NULL
10627556	84	M	WHITE	74.5	NULL	Medicare	English	MARRIED	MICU	9.3	K/uL	2.35	m/uL	NULL	NULL	NULL	NULL	153	K/uL	7.85	g/dL	17.15	%	23.75	%	NULL	NULL	NULL	NULL	NULL	NULL	137	mEq/L	4.6	mEq/L	8.2	mg/dL	99	mEq/L	94	mg/dL	NULL	NULL	21	mEq/L	7.34	units	44	mm Hg
10630941	74	M	WHITE	74.8	NULL	Medicare	English	NULL	TSICU	10.95	K/uL	3.4	m/uL	9.94	K/uL	0.79	K/uL	183	K/uL	10.7	g/dL	13.4	%	31.65	%	NULL	NULL	NULL	NULL	NULL	NULL	135	mEq/L	4.45	mEq/L	8	mg/dL	103.5	mEq/L	148.5	mg/dL	NULL	NULL	12.5	mEq/L	7.34	units	43.5	mm Hg
10631273	53	F	UNKNOWN	68	165	Medicaid	English	NULL	MICU/SICU	3.85	K/uL	3.41	m/uL	NULL	NULL	NULL	NULL	154.5	K/uL	10.85	g/dL	12.9	%	32.55	%	NULL	NULL	NULL	NULL	NULL	NULL	144	mEq/L	3.43	mEq/L	9.05	mg/dL	105.33	mEq/L	110	mg/dL	NULL	NULL	16.5	mEq/L	7.44	units	49.33	mm Hg
10631509	54	F	BLACK/AFRICAN AMERICAN	64.7	163	Medicaid	English	MARRIED	MICU	11.8	K/uL	3.4	m/uL	NULL	NULL	NULL	NULL	106	K/uL	10.5	g/dL	13.2	%	32.5	%	3.2	g/dL	NULL	NULL	NULL	NULL	140	mEq/L	4.67	mEq/L	8	mg/dL	94	mEq/L	120	mg/dL	NULL	NULL	31	mEq/L	7.26	units	44.5	mm Hg
10635271	87	F	WHITE	93.8667	NULL	Medicare	English	DIVORCED	CCU	7.1	K/uL	3.97	m/uL	NULL	NULL	NULL	NULL	119	K/uL	12.9	g/dL	14.2	%	40.4	%	NULL	NULL	NULL	NULL	NULL	NULL	145	mEq/L	4.6	mEq/L	8.4	mg/dL	106	mEq/L	92	mg/dL	NULL	NULL	9	mEq/L	NULL	NULL	NULL	NULL
10641947	71	M	UNKNOWN	86.5	NULL	Medicare	English	MARRIED	CCU	10	K/uL	4.25	m/uL	NULL	NULL	NULL	NULL	88.2	K/uL	13.56	g/dL	13.2	%	40.38	%	NULL	NULL	NULL	NULL	NULL	NULL	138	mEq/L	4.08	mEq/L	8.15	mg/dL	101	mEq/L	122.75	mg/dL	NULL	NULL	18.25	mEq/L	7.36	units	41.67	mm Hg
10656103	88	M	UNKNOWN	80.6	NULL	Medicare	English	NULL	MICU	8.5	K/uL	4.43	m/uL	8.16	K/uL	0.23	K/uL	172	K/uL	11.6	g/dL	15	%	37.3	%	NULL	NULL	NULL	NULL	NULL	NULL	137	mEq/L	4.2	mEq/L	8.7	mg/dL	100	mEq/L	152	mg/dL	NULL	NULL	18	mEq/L	NULL	NULL	NULL	NULL
10658514	68	F	WHITE	68.1	NULL	Medicare	English	SINGLE	Neuro Intermediate	6.1	K/uL	3.98	m/uL	NULL	NULL	NULL	NULL	247	K/uL	11.5	g/dL	12.9	%	35.5	%	NULL	NULL	NULL	NULL	NULL	NULL	142	mEq/L	4.2	mEq/L	7.9	mg/dL	108	mEq/L	95	mg/dL	NULL	NULL	10	mEq/L	NULL	NULL	NULL	NULL
10660997	88	M	UNKNOWN	93	NULL	Medicare	English	MARRIED	Neuro Intermediate	7.1	K/uL	4.56	m/uL	NULL	NULL	NULL	NULL	154	K/uL	13.7	g/dL	13.1	%	40.6	%	NULL	NULL	NULL	NULL	NULL	NULL	136	mEq/L	3.9	mEq/L	8.7	mg/dL	102	mEq/L	117	mg/dL	5.3	%	11	mEq/L	NULL	NULL	NULL	NULL
10661724	67	M	WHITE	89.6	183	Private	English	SINGLE	CVICU	17.53	K/uL	4.04	m/uL	10.76	K/uL	4.29	K/uL	175.67	K/uL	12.3	g/dL	13.7	%	36.42	%	NULL	NULL	NULL	NULL	NULL	NULL	136	mEq/L	5.1	mEq/L	7.7	mg/dL	106	mEq/L	138	mg/dL	NULL	NULL	9	mEq/L	7.33	units	45	mm Hg
10675361	80	F	UNKNOWN	51.2	155	NULL	English	NULL	Neuro SICU	13.3	K/uL	3.99	m/uL	12.53	K/uL	0.35	K/uL	142	K/uL	11	g/dL	13.8	%	35.7	%	NULL	NULL	NULL	NULL	NULL	NULL	134	mEq/L	3.5	mEq/L	NULL	NULL	94	mEq/L	189	mg/dL	NULL	NULL	14	mEq/L	NULL	NULL	NULL	NULL
10677030	78	F	WHITE	56.5	160	Private	English	WIDOWED	SICU	7.7	K/uL	3.26	m/uL	NULL	NULL	NULL	NULL	217	K/uL	9.3	g/dL	14.6	%	29.5	%	NULL	NULL	NULL	NULL	NULL	NULL	138	mEq/L	3.8	mEq/L	8.2	mg/dL	104	mEq/L	101	mg/dL	NULL	NULL	15	mEq/L	7.39	units	40	mm Hg
10678311	81	F	UNKNOWN	80	165	Medicare	English	NULL	CVICU	9.33	K/uL	3.1	m/uL	5.85	K/uL	1.08	K/uL	109	K/uL	8.87	g/dL	13.17	%	28.86	%	NULL	NULL	NULL	NULL	NULL	NULL	132	mEq/L	4.57	mEq/L	8.3	mg/dL	103.5	mEq/L	101.5	mg/dL	NULL	NULL	8	mEq/L	7.38	units	35.83	mm Hg
10679138	93	F	WHITE	68.8	NULL	Medicare	English	WIDOWED	MICU	5.3	K/uL	2.95	m/uL	NULL	NULL	NULL	NULL	316	K/uL	8.7	g/dL	13.7	%	24.3	%	3.3	g/dL	NULL	NULL	NULL	NULL	121	mEq/L	4.25	mEq/L	8.55	mg/dL	85.5	mEq/L	150.5	mg/dL	NULL	NULL	13.5	mEq/L	NULL	NULL	NULL	NULL
10679239	55	F	WHITE	58.5	NULL	Medicaid	English	SINGLE	Neuro Stepdown	6.9	K/uL	4.17	m/uL	NULL	NULL	NULL	NULL	194	K/uL	12.3	g/dL	12.9	%	36.8	%	4	g/dL	NULL	NULL	NULL	NULL	139	mEq/L	3.4	mEq/L	9.4	mg/dL	102	mEq/L	88	mg/dL	5.3	%	17	mEq/L	NULL	NULL	NULL	NULL
10681607	58	F	WHITE	42.2	157	Medicare	English	NULL	MICU	6.9	K/uL	2.84	m/uL	6.52	K/uL	0.23	K/uL	192	K/uL	9.5	g/dL	12.6	%	30	%	NULL	NULL	NULL	NULL	NULL	NULL	133	mEq/L	5	mEq/L	9.2	mg/dL	87	mEq/L	115	mg/dL	NULL	NULL	8	mEq/L	7.35	units	90	mm Hg
10685798	80	M	UNKNOWN	73.2	165	Medicare	English	MARRIED	Neuro Stepdown	7.15	K/uL	3.45	m/uL	NULL	NULL	NULL	NULL	86	K/uL	10.2	g/dL	13.2	%	32	%	NULL	NULL	NULL	NULL	NULL	NULL	137	mEq/L	3.8	mEq/L	8.3	mg/dL	101.5	mEq/L	106.5	mg/dL	NULL	NULL	17	mEq/L	7.4	units	41	mm Hg
10688071	66	F	UNKNOWN	87.7	175	Medicare	English	SINGLE	MICU	8.6	K/uL	3.64	m/uL	NULL	NULL	NULL	NULL	278	K/uL	10.9	g/dL	14.6	%	35.1	%	NULL	NULL	NULL	NULL	NULL	NULL	143	mEq/L	3.3	mEq/L	9.2	mg/dL	108	mEq/L	103	mg/dL	NULL	NULL	12	mEq/L	7.29	units	52	mm Hg
10698312	72	F	WHITE - RUSSIAN	74.3667	NULL	Medicaid	English	SINGLE	MICU/SICU	5.1	K/uL	3.75	m/uL	NULL	NULL	NULL	NULL	148	K/uL	10.1	g/dL	14.6	%	33.2	%	3.7	g/dL	NULL	NULL	NULL	NULL	144.5	mEq/L	4	mEq/L	8.05	mg/dL	102	mEq/L	143.5	mg/dL	NULL	NULL	16.5	mEq/L	7.33	units	66	mm Hg
10702059	61	F	HISPANIC/LATINO - HONDURAN	63.7	NULL	Medicare	Spanish	SINGLE	MICU	3.7	K/uL	3.05	m/uL	NULL	NULL	NULL	NULL	207	K/uL	7.3	g/dL	25	%	26.2	%	NULL	NULL	NULL	NULL	NULL	NULL	138	mEq/L	4.2	mEq/L	8.5	mg/dL	106.5	mEq/L	100	mg/dL	NULL	NULL	6.5	mEq/L	NULL	NULL	NULL	NULL
10705102	72	F	WHITE	74.9	160	Medicare	NULL	MARRIED	MICU	11.25	K/uL	4.29	m/uL	9.18	K/uL	1.57	K/uL	145	K/uL	11.55	g/dL	28.4	%	37.95	%	3.5	g/dL	NULL	NULL	NULL	NULL	134	mEq/L	4.4	mEq/L	8.65	mg/dL	96	mEq/L	135	mg/dL	NULL	NULL	15.5	mEq/L	7.37	units	57	mm Hg
10706081	69	M	WHITE	84.2	183	Medicare	English	MARRIED	CVICU	11.43	K/uL	3.39	m/uL	7.71	K/uL	1.52	K/uL	128.75	K/uL	10.45	g/dL	13.65	%	32	%	NULL	NULL	NULL	NULL	NULL	NULL	133	mEq/L	4.4	mEq/L	NULL	NULL	103	mEq/L	108	mg/dL	NULL	NULL	9	mEq/L	7.37	units	47.9	mm Hg
10710924	67	M	WHITE	80.1	NULL	Medicare	English	DIVORCED	Neuro Intermediate	14.1	K/uL	4.75	m/uL	NULL	NULL	NULL	NULL	298.5	K/uL	14.5	g/dL	12.2	%	42.1	%	NULL	NULL	NULL	NULL	NULL	NULL	143.5	mEq/L	3.85	mEq/L	8.45	mg/dL	110.5	mEq/L	144	mg/dL	NULL	NULL	11.5	mEq/L	NULL	NULL	NULL	NULL
10711408	59	M	WHITE	73.25	NULL	Medicaid	English	DIVORCED	SICU	16.9	K/uL	2.63	m/uL	NULL	NULL	NULL	NULL	263.5	K/uL	7.65	g/dL	16.65	%	24.25	%	NULL	NULL	NULL	NULL	NULL	NULL	141	mEq/L	4.4	mEq/L	8.4	mg/dL	106	mEq/L	114	mg/dL	NULL	NULL	7	mEq/L	NULL	NULL	NULL	NULL
10716890	92	F	WHITE	55	145	Medicare	English	WIDOWED	MICU/SICU	29.9	K/uL	3.87	m/uL	NULL	NULL	NULL	NULL	215	K/uL	10.7	g/dL	15.1	%	34.2	%	3.2	g/dL	NULL	NULL	NULL	NULL	136	mEq/L	3.8	mEq/L	8.4	mg/dL	97	mEq/L	121	mg/dL	NULL	NULL	17	mEq/L	7.42	units	48	mm Hg
10724519	72	M	WHITE	87.1	175	Medicare	English	MARRIED	CVICU	20.3	K/uL	3.27	m/uL	10.4	K/uL	3.03	K/uL	133.33	K/uL	10.43	g/dL	12.63	%	31.53	%	NULL	NULL	NULL	NULL	NULL	NULL	136.33	mEq/L	4.37	mEq/L	7.4	mg/dL	105.33	mEq/L	130	mg/dL	NULL	NULL	14	mEq/L	7.32	units	44.63	mm Hg
10728225	60	F	UNABLE TO OBTAIN	81.15	163	Medicaid	English	NULL	MICU	12.6	K/uL	3.99	m/uL	10.8	K/uL	1.08	K/uL	296	K/uL	11.05	g/dL	14.9	%	36.6	%	3.4	g/dL	NULL	NULL	NULL	NULL	138.5	mEq/L	4.05	mEq/L	8.5	mg/dL	102.5	mEq/L	143.5	mg/dL	NULL	NULL	11	mEq/L	7.32	units	48.89	mm Hg
10734586	73	F	UNKNOWN	74.8	157	Medicare	Kabuverdianu	SINGLE	CVICU	15.95	K/uL	2.93	m/uL	13.56	K/uL	1.81	K/uL	126.75	K/uL	9.35	g/dL	16.2	%	27.38	%	3.3	g/dL	NULL	NULL	NULL	NULL	139.5	mEq/L	4.37	mEq/L	7.95	mg/dL	105.67	mEq/L	101.5	mg/dL	NULL	NULL	8.67	mEq/L	7.42	units	39.38	mm Hg
10745734	79	F	WHITE	53.7	NULL	Medicare	English	WIDOWED	TSICU	10.55	K/uL	2.58	m/uL	9.41	K/uL	0.74	K/uL	215.5	K/uL	8.35	g/dL	18	%	26.6	%	NULL	NULL	NULL	NULL	NULL	NULL	137	mEq/L	4.05	mEq/L	7.95	mg/dL	99.5	mEq/L	84.5	mg/dL	NULL	NULL	8	mEq/L	7.28	units	71.33	mm Hg
10755171	81	F	WHITE	63.9	NULL	Medicare	English	WIDOWED	MICU/SICU	10.97	K/uL	4.41	m/uL	8.62	K/uL	0.95	K/uL	44	K/uL	9.37	g/dL	19.67	%	30.4	%	3.2	g/dL	NULL	NULL	NULL	NULL	141.33	mEq/L	4.5	mEq/L	8.53	mg/dL	103	mEq/L	204	mg/dL	NULL	NULL	13.33	mEq/L	NULL	NULL	NULL	NULL
10759268	72	M	WHITE	94.6	NULL	Medicare	English	SINGLE	TSICU	NULL	NULL	NULL	NULL	NULL	NULL	NULL	NULL	NULL	NULL	NULL	NULL	NULL	NULL	NULL	NULL	NULL	NULL	NULL	NULL	NULL	NULL	138	mEq/L	4.2	mEq/L	9	mg/dL	99.5	mEq/L	106.5	mg/dL	NULL	NULL	16.5	mEq/L	7.42	units	45	mm Hg
10763460	80	F	WHITE	111.1	NULL	Medicare	English	MARRIED	CCU	16.65	K/uL	3.07	m/uL	NULL	NULL	NULL	NULL	189.5	K/uL	9.35	g/dL	13.05	%	30.25	%	NULL	NULL	NULL	NULL	NULL	NULL	144	mEq/L	4.65	mEq/L	9.4	mg/dL	94	mEq/L	249	mg/dL	NULL	NULL	11.5	mEq/L	7.34	units	80.5	mm Hg
10763912	59	F	UNKNOWN	57.8	165	Medicaid	English	NULL	Neuro Intermediate	13.9	K/uL	3.7	m/uL	NULL	NULL	NULL	NULL	285	K/uL	11.7	g/dL	17.4	%	37.85	%	3.1	g/dL	NULL	NULL	NULL	NULL	138	mEq/L	4.6	mEq/L	8.7	mg/dL	97	mEq/L	136	mg/dL	NULL	NULL	11.5	mEq/L	NULL	NULL	NULL	NULL
10764521	81	M	WHITE	71	NULL	Medicare	English	MARRIED	MICU	8.85	K/uL	4.14	m/uL	NULL	NULL	NULL	NULL	222.5	K/uL	13.75	g/dL	13.55	%	43.8	%	NULL	NULL	NULL	NULL	NULL	NULL	135	mEq/L	5.5	mEq/L	9.4	mg/dL	97.5	mEq/L	170.5	mg/dL	NULL	NULL	9	mEq/L	7.29	units	63	mm Hg
10768463	76	M	UNKNOWN	83.5	173	Medicare	English	NULL	CVICU	19.4	K/uL	3.47	m/uL	15.82	K/uL	1.9	K/uL	166	K/uL	10.03	g/dL	13.93	%	31.2	%	NULL	NULL	NULL	NULL	NULL	NULL	141	mEq/L	4.5	mEq/L	7.3	mg/dL	112	mEq/L	164	mg/dL	NULL	NULL	11.5	mEq/L	7.36	units	39.13	mm Hg
10773079	72	F	WHITE	102.158	160	Medicare	English	SINGLE	MICU	13.3	K/uL	2.58	m/uL	NULL	NULL	NULL	NULL	210	K/uL	7.9	g/dL	13.6	%	25.4	%	2.6	g/dL	NULL	NULL	NULL	NULL	135.25	mEq/L	4.95	mEq/L	8.93	mg/dL	96	mEq/L	134	mg/dL	NULL	NULL	15.5	mEq/L	7.16	units	67.71	mm Hg
10781773	61	M	WHITE	124	160	Medicaid	English	SINGLE	CCU	7.4	K/uL	3.85	m/uL	4.51	K/uL	2.76	K/uL	145.5	K/uL	11.65	g/dL	13.2	%	35.8	%	NULL	NULL	NULL	NULL	NULL	NULL	141	mEq/L	4.1	mEq/L	8.6	mg/dL	106	mEq/L	99.5	mg/dL	NULL	NULL	13.5	mEq/L	NULL	NULL	NULL	NULL
10785948	78	F	WHITE	69.8	174	Medicare	English	DIVORCED	CVICU	11.27	K/uL	2.76	m/uL	7.08	K/uL	1.94	K/uL	153.67	K/uL	8.63	g/dL	12.7	%	25.48	%	NULL	NULL	NULL	NULL	NULL	NULL	139	mEq/L	4.05	mEq/L	8.5	mg/dL	106	mEq/L	139	mg/dL	NULL	NULL	13.5	mEq/L	7.42	units	39.75	mm Hg
10786895	68	M	WHITE	59	NULL	Medicare	English	SINGLE	TSICU	12.57	K/uL	2.69	m/uL	NULL	NULL	NULL	NULL	121.33	K/uL	8.5	g/dL	16.77	%	26.43	%	NULL	NULL	NULL	NULL	NULL	NULL	132.5	mEq/L	4.1	mEq/L	7.75	mg/dL	98	mEq/L	125.5	mg/dL	NULL	NULL	6.5	mEq/L	7.4	units	48	mm Hg
10790847	75	F	WHITE	70	170	Medicare	English	DIVORCED	MICU	26.33	K/uL	4.26	m/uL	20.91	K/uL	1.08	K/uL	154.33	K/uL	11.37	g/dL	14	%	39.57	%	2.2	g/dL	NULL	NULL	NULL	NULL	138	mEq/L	4.4	mEq/L	6.75	mg/dL	101.67	mEq/L	282.33	mg/dL	NULL	NULL	21.33	mEq/L	7.03	units	64.44	mm Hg
10791809	66	F	UNABLE TO OBTAIN	61.95	163	Medicare	English	DIVORCED	CVICU	20.7	K/uL	3.38	m/uL	17.68	K/uL	6.47	K/uL	225.25	K/uL	9.7	g/dL	13.95	%	31.65	%	NULL	NULL	NULL	NULL	NULL	NULL	136	mEq/L	4.7	mEq/L	7.9	mg/dL	108.5	mEq/L	124	mg/dL	NULL	NULL	9.5	mEq/L	7.31	units	45.69	mm Hg
10795168	64	M	HISPANIC/LATINO - PUERTO RICAN	81.2	NULL	Medicare	Spanish	SINGLE	MICU	14.7	K/uL	5.15	m/uL	NULL	NULL	NULL	NULL	145	K/uL	15.8	g/dL	13	%	46.5	%	NULL	NULL	NULL	NULL	NULL	NULL	136	mEq/L	4	mEq/L	8.6	mg/dL	98	mEq/L	291	mg/dL	NULL	NULL	19	mEq/L	NULL	NULL	NULL	NULL
10796263	72	F	WHITE	115.267	NULL	Medicare	English	WIDOWED	SICU	5.9	K/uL	2.79	m/uL	5.13	K/uL	0.4	K/uL	180	K/uL	9.4	g/dL	15.95	%	30.05	%	NULL	NULL	NULL	NULL	NULL	NULL	136.5	mEq/L	5	mEq/L	9	mg/dL	94.5	mEq/L	125	mg/dL	NULL	NULL	17	mEq/L	NULL	NULL	NULL	NULL
10804747	78	F	WHITE	59.5	NULL	Medicare	English	DIVORCED	MICU/SICU	7.2	K/uL	4.29	m/uL	4.6	K/uL	2.04	K/uL	287	K/uL	12	g/dL	16.9	%	37.95	%	3.6	g/dL	NULL	NULL	NULL	NULL	134.67	mEq/L	4.43	mEq/L	8.33	mg/dL	99.33	mEq/L	167.33	mg/dL	NULL	NULL	20.67	mEq/L	7.36	units	39	mm Hg
10806101	89	F	UNKNOWN	47.6	NULL	Medicare	English	NULL	SICU	23.1	K/uL	3.32	m/uL	NULL	NULL	NULL	NULL	231	K/uL	9.8	g/dL	15.7	%	32	%	NULL	NULL	NULL	NULL	NULL	NULL	137	mEq/L	3.6	mEq/L	7.7	mg/dL	97	mEq/L	121	mg/dL	NULL	NULL	16	mEq/L	7.46	units	39	mm Hg
10807564	67	F	WHITE	102	NULL	Medicare	English	MARRIED	TSICU	7.2	K/uL	4.43	m/uL	NULL	NULL	NULL	NULL	232	K/uL	13.7	g/dL	13	%	40.1	%	NULL	NULL	NULL	NULL	NULL	NULL	140	mEq/L	3.5	mEq/L	9.6	mg/dL	108	mEq/L	109	mg/dL	NULL	NULL	13	mEq/L	NULL	NULL	NULL	NULL
10809079	72	F	WHITE	74.65	165	Medicaid	English	WIDOWED	MICU	5.7	K/uL	3.07	m/uL	5.3	K/uL	0.06	K/uL	107	K/uL	7.7	g/dL	18.6	%	26.1	%	NULL	NULL	NULL	NULL	NULL	NULL	150	mEq/L	3.65	mEq/L	7.95	mg/dL	102.5	mEq/L	80	mg/dL	NULL	NULL	20.5	mEq/L	7.43	units	48	mm Hg
10816791	71	F	WHITE	74	157	Medicare	English	NULL	CVICU	17.07	K/uL	3.24	m/uL	7.7	K/uL	1.61	K/uL	160.67	K/uL	9.67	g/dL	13.77	%	29.33	%	NULL	NULL	NULL	NULL	NULL	NULL	137	mEq/L	4.85	mEq/L	NULL	NULL	103.5	mEq/L	130	mg/dL	NULL	NULL	10.5	mEq/L	7.4	units	37.67	mm Hg
10823854	82	M	WHITE - OTHER EUROPEAN	79.15	166	Medicare	English	MARRIED	SICU	10.7	K/uL	2.76	m/uL	NULL	NULL	NULL	NULL	257.5	K/uL	8.35	g/dL	16.2	%	25.9	%	2.1	g/dL	NULL	NULL	NULL	NULL	132.33	mEq/L	3.63	mEq/L	7.4	mg/dL	101	mEq/L	132.67	mg/dL	NULL	NULL	11	mEq/L	7.3	units	43	mm Hg
10824692	64	M	WHITE	73.7	178	Medicaid	English	NULL	TSICU	8.95	K/uL	3.24	m/uL	NULL	NULL	NULL	NULL	240.25	K/uL	9.93	g/dL	16.23	%	31.5	%	NULL	NULL	NULL	NULL	NULL	NULL	140.6	mEq/L	4.2	mEq/L	7.82	mg/dL	108.6	mEq/L	149.4	mg/dL	NULL	NULL	11.2	mEq/L	7.36	units	41.75	mm Hg
10826718	74	M	WHITE	74	NULL	Medicare	English	WIDOWED	Neuro Stepdown	11.8	K/uL	4.78	m/uL	NULL	NULL	NULL	NULL	224	K/uL	14.4	g/dL	14.1	%	42.9	%	NULL	NULL	NULL	NULL	NULL	NULL	144	mEq/L	3.9	mEq/L	8.9	mg/dL	104	mEq/L	84	mg/dL	5.8	%	13	mEq/L	NULL	NULL	NULL	NULL
10828900	67	F	WHITE	47.65	170	Private	English	MARRIED	CVICU	11.45	K/uL	4.14	m/uL	NULL	NULL	NULL	NULL	291.5	K/uL	12.5	g/dL	14.3	%	40.95	%	NULL	NULL	NULL	NULL	NULL	NULL	141	mEq/L	4.9	mEq/L	8.8	mg/dL	100	mEq/L	81	mg/dL	NULL	NULL	10	mEq/L	NULL	NULL	NULL	NULL
10832862	81	F	WHITE	75.7	NULL	Medicare	English	MARRIED	CCU	8.95	K/uL	4.81	m/uL	NULL	NULL	NULL	NULL	105.25	K/uL	14.75	g/dL	18.35	%	46.43	%	NULL	NULL	NULL	NULL	NULL	NULL	141	mEq/L	4.05	mEq/L	8.6	mg/dL	99.5	mEq/L	76	mg/dL	NULL	NULL	10.5	mEq/L	7.41	units	57	mm Hg
10833257	92	M	WHITE - RUSSIAN	83.8	NULL	Medicare	Russian	SINGLE	MICU/SICU	6	K/uL	2.46	m/uL	NULL	NULL	NULL	NULL	127	K/uL	9	g/dL	13.6	%	27.3	%	3.4	g/dL	NULL	NULL	NULL	NULL	139	mEq/L	4.3	mEq/L	7.6	mg/dL	106	mEq/L	126	mg/dL	NULL	NULL	16	mEq/L	NULL	NULL	NULL	NULL
10835840	71	F	BLACK/AFRICAN AMERICAN	50.3	NULL	Medicaid	English	SINGLE	Neuro Intermediate	8.5	K/uL	3.46	m/uL	NULL	NULL	NULL	NULL	431	K/uL	11.3	g/dL	14.8	%	34.1	%	NULL	NULL	NULL	NULL	NULL	NULL	144	mEq/L	3.3	mEq/L	9	mg/dL	104	mEq/L	149	mg/dL	NULL	NULL	13	mEq/L	NULL	NULL	NULL	NULL
10836688	74	M	WHITE	77.9	183	Medicare	English	MARRIED	TSICU	12.3	K/uL	3.14	m/uL	NULL	NULL	NULL	NULL	344	K/uL	9.5	g/dL	19.7	%	30.8	%	NULL	NULL	NULL	NULL	NULL	NULL	134	mEq/L	5	mEq/L	8.35	mg/dL	92.5	mEq/L	72.5	mg/dL	NULL	NULL	17	mEq/L	7.33	units	43	mm Hg
10838580	92	M	WHITE	78.5333	165	Medicare	Modern Greek (1453-)	MARRIED	MICU	17.97	K/uL	4.12	m/uL	NULL	NULL	NULL	NULL	188	K/uL	12.43	g/dL	14.13	%	39.03	%	NULL	NULL	NULL	NULL	NULL	NULL	140.5	mEq/L	3.8	mEq/L	9.7	mg/dL	94.5	mEq/L	187	mg/dL	NULL	NULL	12	mEq/L	7.42	units	57	mm Hg
10840912	68	M	WHITE	124.7	NULL	Medicare	English	SINGLE	Neuro Intermediate	11.7	K/uL	4.85	m/uL	NULL	NULL	NULL	NULL	273	K/uL	12.7	g/dL	14.4	%	41.9	%	NULL	NULL	NULL	NULL	NULL	NULL	139	mEq/L	4.5	mEq/L	9.5	mg/dL	105	mEq/L	145	mg/dL	NULL	NULL	12	mEq/L	NULL	NULL	NULL	NULL
10856002	73	F	WHITE	61.2	168	Medicare	English	MARRIED	MICU/SICU	NULL	NULL	NULL	NULL	NULL	NULL	NULL	NULL	NULL	NULL	NULL	NULL	NULL	NULL	NULL	NULL	NULL	NULL	NULL	NULL	NULL	NULL	NULL	NULL	NULL	NULL	NULL	NULL	NULL	NULL	NULL	NULL	NULL	NULL	NULL	NULL	NULL	NULL	NULL	NULL
10856638	58	M	BLACK/AFRICAN AMERICAN	103.2	NULL	Medicaid	English	SINGLE	CCU	6.9	K/uL	4.11	m/uL	NULL	NULL	NULL	NULL	243	K/uL	9.4	g/dL	22.8	%	31.4	%	2.7	g/dL	NULL	NULL	NULL	NULL	135.5	mEq/L	4	mEq/L	8.5	mg/dL	97	mEq/L	110.5	mg/dL	NULL	NULL	14	mEq/L	7.44	units	41	mm Hg
10860303	89	F	BLACK/AFRICAN AMERICAN	92.4	155	Medicare	English	WIDOWED	MICU/SICU	31.37	K/uL	3.66	m/uL	NULL	NULL	NULL	NULL	161.83	K/uL	10.53	g/dL	17.57	%	33.2	%	NULL	NULL	NULL	NULL	NULL	NULL	132.83	mEq/L	4.3	mEq/L	8.75	mg/dL	92.83	mEq/L	125.5	mg/dL	NULL	NULL	17	mEq/L	7.27	units	56.71	mm Hg
10860925	59	M	HISPANIC/LATINO - PUERTO RICAN	52.3	NULL	Medicaid	English	SINGLE	SICU	17.55	K/uL	3.68	m/uL	NULL	NULL	NULL	NULL	415	K/uL	10.25	g/dL	13.9	%	31.15	%	3	g/dL	NULL	NULL	NULL	NULL	137	mEq/L	4.1	mEq/L	8.6	mg/dL	97.5	mEq/L	169.5	mg/dL	6.6	%	14	mEq/L	NULL	NULL	NULL	NULL
10864650	72	M	WHITE	87.2	175	Medicaid	English	MARRIED	SICU	10.3	K/uL	4.34	m/uL	NULL	NULL	NULL	NULL	153	K/uL	12.8	g/dL	14.2	%	37.9	%	NULL	NULL	NULL	NULL	NULL	NULL	141.33	mEq/L	3.97	mEq/L	8.53	mg/dL	104	mEq/L	117.33	mg/dL	NULL	NULL	15	mEq/L	7.42	units	34	mm Hg
10866298	87	F	WHITE	61.5	140	Medicare	English	WIDOWED	SICU	9.15	K/uL	2.89	m/uL	NULL	NULL	NULL	NULL	166.75	K/uL	7.83	g/dL	15.63	%	25.33	%	3.1	g/dL	NULL	NULL	NULL	NULL	141.5	mEq/L	3.85	mEq/L	8.15	mg/dL	108.25	mEq/L	128.75	mg/dL	NULL	NULL	15	mEq/L	7.34	units	44.5	mm Hg
10872648	60	M	WHITE	144	168	Medicare	English	NULL	CVICU	19.37	K/uL	3.73	m/uL	15.08	K/uL	1.69	K/uL	148.33	K/uL	11.67	g/dL	14.13	%	36.35	%	NULL	NULL	NULL	NULL	NULL	NULL	140	mEq/L	5.22	mEq/L	8	mg/dL	106	mEq/L	119	mg/dL	NULL	NULL	10.5	mEq/L	7.33	units	44.7	mm Hg
10874300	66	M	UNKNOWN	105	173	Medicare	English	SINGLE	MICU/SICU	10.8	K/uL	4.07	m/uL	6.57	K/uL	1.21	K/uL	234	K/uL	12.45	g/dL	16.65	%	40.05	%	2.9	g/dL	NULL	NULL	NULL	NULL	138	mEq/L	4.5	mEq/L	8.18	mg/dL	101.5	mEq/L	109.25	mg/dL	NULL	NULL	17.75	mEq/L	7.22	units	69.25	mm Hg
10877695	59	F	HISPANIC/LATINO - PUERTO RICAN	90	NULL	Private	English	MARRIED	MICU/SICU	12.45	K/uL	3	m/uL	NULL	NULL	NULL	NULL	220.5	K/uL	8.43	g/dL	16.45	%	26.18	%	NULL	NULL	NULL	NULL	NULL	NULL	134	mEq/L	4.75	mEq/L	7.6	mg/dL	98.5	mEq/L	132.5	mg/dL	NULL	NULL	10.5	mEq/L	7.34	units	46	mm Hg
10877728	86	M	UNKNOWN	80.8	180	Medicare	English	MARRIED	CVICU	12.5	K/uL	2.58	m/uL	11.3	K/uL	1.14	K/uL	121.33	K/uL	8.27	g/dL	14.93	%	25.98	%	NULL	NULL	NULL	NULL	NULL	NULL	134.25	mEq/L	4.9	mEq/L	7.6	mg/dL	103	mEq/L	80	mg/dL	NULL	NULL	13.5	mEq/L	7.37	units	42.86	mm Hg
10878101	76	M	WHITE	114.95	188	Medicare	English	MARRIED	CVICU	20.1	K/uL	3.82	m/uL	17.69	K/uL	1.92	K/uL	165.67	K/uL	12.23	g/dL	13.2	%	37.05	%	NULL	NULL	NULL	NULL	NULL	NULL	139	mEq/L	4.8	mEq/L	8.4	mg/dL	106	mEq/L	123.5	mg/dL	NULL	NULL	11.5	mEq/L	7.4	units	38.2	mm Hg
10881561	64	M	WHITE	81.1667	168	Medicare	English	SINGLE	TSICU	16.8	K/uL	3.73	m/uL	NULL	NULL	NULL	NULL	386	K/uL	10.75	g/dL	14.3	%	33.65	%	NULL	NULL	NULL	NULL	NULL	NULL	141.5	mEq/L	4.6	mEq/L	8.65	mg/dL	102.5	mEq/L	122	mg/dL	NULL	NULL	11	mEq/L	7.31	units	60.22	mm Hg
10882394	70	M	WHITE	75.1	NULL	Private	English	MARRIED	MICU/SICU	18.3	K/uL	4.64	m/uL	NULL	NULL	NULL	NULL	147	K/uL	14.3	g/dL	14.8	%	44.1	%	NULL	NULL	NULL	NULL	NULL	NULL	135	mEq/L	6.7	mEq/L	8.5	mg/dL	99	mEq/L	173	mg/dL	NULL	NULL	11	mEq/L	7.3	units	56.5	mm Hg
10883419	69	M	WHITE	118	NULL	Private	English	MARRIED	Neuro Intermediate	14.55	K/uL	4.88	m/uL	13.34	K/uL	0.81	K/uL	193.5	K/uL	14.8	g/dL	13.3	%	44.85	%	NULL	NULL	NULL	NULL	NULL	NULL	141	mEq/L	3.7	mEq/L	9.2	mg/dL	106	mEq/L	212	mg/dL	NULL	NULL	18	mEq/L	NULL	NULL	NULL	NULL
10884125	63	M	WHITE	73.4	178	Medicaid	English	DIVORCED	MICU	4.5	K/uL	3.26	m/uL	NULL	NULL	NULL	NULL	261	K/uL	11.1	g/dL	15.1	%	32.6	%	NULL	NULL	NULL	NULL	NULL	NULL	139	mEq/L	3.8	mEq/L	9	mg/dL	97	mEq/L	91	mg/dL	NULL	NULL	17	mEq/L	NULL	NULL	NULL	NULL
10887901	70	M	BLACK/AFRICAN AMERICAN	58.8	178	Medicare	Spanish	MARRIED	MICU	NULL	NULL	NULL	NULL	NULL	NULL	NULL	NULL	NULL	NULL	NULL	NULL	NULL	NULL	NULL	NULL	NULL	NULL	NULL	NULL	NULL	NULL	NULL	NULL	NULL	NULL	NULL	NULL	NULL	NULL	NULL	NULL	NULL	NULL	NULL	NULL	NULL	NULL	NULL	NULL
10901490	69	F	WHITE	43.3	157	Medicare	English	MARRIED	CCU	12.03	K/uL	2.94	m/uL	NULL	NULL	NULL	NULL	168	K/uL	11.08	g/dL	14.78	%	32.48	%	2.97	g/dL	NULL	NULL	NULL	NULL	130.5	mEq/L	4.08	mEq/L	7.57	mg/dL	101.75	mEq/L	120	mg/dL	NULL	NULL	10	mEq/L	7.28	units	47	mm Hg
10902267	70	M	WHITE	74.4	173	Private	English	MARRIED	MICU/SICU	7.13	K/uL	4.15	m/uL	6.27	K/uL	0.2	K/uL	79.67	K/uL	12.33	g/dL	13.93	%	38.37	%	3.3	g/dL	NULL	NULL	NULL	NULL	137.67	mEq/L	4	mEq/L	9.03	mg/dL	94	mEq/L	106.67	mg/dL	NULL	NULL	16	mEq/L	7.41	units	51.33	mm Hg
10903614	92	F	WHITE	45	NULL	Medicaid	English	WIDOWED	CVICU	7.2	K/uL	3.84	m/uL	5.66	K/uL	0.6	K/uL	219	K/uL	9.9	g/dL	17.15	%	32.15	%	NULL	NULL	NULL	NULL	NULL	NULL	145.5	mEq/L	3.95	mEq/L	8.65	mg/dL	102.5	mEq/L	124.5	mg/dL	NULL	NULL	16	mEq/L	7.39	units	45	mm Hg
10903688	75	M	WHITE	59.7	NULL	Medicare	English	SINGLE	Neuro Intermediate	9.95	K/uL	4.2	m/uL	NULL	NULL	NULL	NULL	222	K/uL	14.25	g/dL	12.35	%	40.1	%	NULL	NULL	NULL	NULL	NULL	NULL	130.5	mEq/L	4.25	mEq/L	9.05	mg/dL	98.5	mEq/L	92	mg/dL	5	%	11	mEq/L	NULL	NULL	NULL	NULL
10904094	75	M	WHITE	88.45	NULL	Medicare	English	DIVORCED	CCU	5.9	K/uL	2.63	m/uL	5.35	K/uL	0.23	K/uL	256	K/uL	7.8	g/dL	15.5	%	25.7	%	NULL	NULL	NULL	NULL	NULL	NULL	137.5	mEq/L	4.05	mEq/L	8.45	mg/dL	97.5	mEq/L	144.5	mg/dL	NULL	NULL	15	mEq/L	7.39	units	44.4	mm Hg
10904848	72	M	WHITE	74.5	NULL	Medicare	English	MARRIED	MICU	18.8	K/uL	4.39	m/uL	NULL	NULL	NULL	NULL	191.5	K/uL	13.8	g/dL	13.8	%	41	%	NULL	NULL	NULL	NULL	NULL	NULL	141	mEq/L	4.05	mEq/L	8.95	mg/dL	106	mEq/L	131.5	mg/dL	NULL	NULL	13	mEq/L	7.41	units	36.33	mm Hg
10906506	60	M	WHITE	130.05	198	Other	English	SINGLE	CVICU	9	K/uL	4.78	m/uL	NULL	NULL	NULL	NULL	315	K/uL	12.9	g/dL	14.7	%	41.6	%	NULL	NULL	NULL	NULL	NULL	NULL	132	mEq/L	4.3	mEq/L	9.3	mg/dL	96	mEq/L	141	mg/dL	NULL	NULL	13	mEq/L	7.36	units	50	mm Hg
10913302	35	M	WHITE	62.5	NULL	Medicare	English	SINGLE	MICU/SICU	12.15	K/uL	2.7	m/uL	11.85	K/uL	1.11	K/uL	463.5	K/uL	8.6	g/dL	19.5	%	27.8	%	3.3	g/dL	NULL	NULL	NULL	NULL	139	mEq/L	3.95	mEq/L	8.8	mg/dL	96.5	mEq/L	84	mg/dL	NULL	NULL	16.5	mEq/L	7.41	units	47.5	mm Hg
10918291	49	M	WHITE	88.7	NULL	Medicaid	English	SINGLE	Neuro Stepdown	8.5	K/uL	3.26	m/uL	NULL	NULL	NULL	NULL	212	K/uL	10.5	g/dL	13	%	32.1	%	NULL	NULL	NULL	NULL	NULL	NULL	139	mEq/L	3.3	mEq/L	7.1	mg/dL	105	mEq/L	103	mg/dL	NULL	NULL	15	mEq/L	NULL	NULL	NULL	NULL
10920628	65	M	WHITE	96.3	NULL	Private	English	MARRIED	MICU/SICU	5.23	K/uL	3.9	m/uL	3.22	K/uL	0.9	K/uL	97.25	K/uL	12.73	g/dL	20.98	%	39.15	%	3.2	g/dL	NULL	NULL	NULL	NULL	138.5	mEq/L	4.35	mEq/L	8.15	mg/dL	106	mEq/L	90	mg/dL	NULL	NULL	14.5	mEq/L	NULL	NULL	NULL	NULL
10926361	72	F	WHITE	81	165	Medicare	English	DIVORCED	CVICU	12.26	K/uL	3.49	m/uL	11.57	K/uL	1.81	K/uL	122	K/uL	10.83	g/dL	12.89	%	32.56	%	NULL	NULL	NULL	NULL	NULL	NULL	138.67	mEq/L	4.4	mEq/L	10.6	mg/dL	102	mEq/L	119	mg/dL	NULL	NULL	10.75	mEq/L	7.41	units	47.55	mm Hg
10929752	58	F	UNKNOWN	100	NULL	Private	English	NULL	CCU	8.2	K/uL	4	m/uL	6.33	K/uL	1.28	K/uL	139.5	K/uL	10.8	g/dL	28.55	%	34.9	%	3.8	g/dL	NULL	NULL	NULL	NULL	139	mEq/L	3.47	mEq/L	9.1	mg/dL	92.33	mEq/L	110	mg/dL	NULL	NULL	14.33	mEq/L	7.41	units	53	mm Hg
10930151	86	F	WHITE	67.6667	157	Medicare	English	NULL	MICU	11.2	K/uL	2.72	m/uL	9.57	K/uL	0.81	K/uL	250	K/uL	8	g/dL	13.5	%	25.6	%	3.7	g/dL	NULL	NULL	NULL	NULL	129	mEq/L	4.2	mEq/L	8.8	mg/dL	88	mEq/L	189	mg/dL	NULL	NULL	16	mEq/L	7.37	units	49	mm Hg
10930214	54	M	WHITE	99.1	180	Medicare	English	SINGLE	TSICU	10.4	K/uL	3.35	m/uL	NULL	NULL	NULL	NULL	146	K/uL	9.05	g/dL	16.95	%	28.9	%	2.6	g/dL	NULL	NULL	NULL	NULL	135.5	mEq/L	3.8	mEq/L	8.25	mg/dL	100	mEq/L	127	mg/dL	NULL	NULL	12.5	mEq/L	7.4	units	43.67	mm Hg
10930322	88	M	WHITE	63.48	163	Medicare	English	WIDOWED	MICU	10.23	K/uL	3.71	m/uL	8.09	K/uL	1.49	K/uL	157.5	K/uL	10.55	g/dL	16.65	%	33.93	%	NULL	NULL	NULL	NULL	NULL	NULL	137.25	mEq/L	4.82	mEq/L	10.1	mg/dL	98	mEq/L	128.75	mg/dL	NULL	NULL	12	mEq/L	7.45	units	42	mm Hg
10930646	88	F	WHITE	54.8	150	Medicare	English	WIDOWED	CCU	11.05	K/uL	3.18	m/uL	NULL	NULL	NULL	NULL	195.5	K/uL	9.75	g/dL	15	%	29.9	%	NULL	NULL	NULL	NULL	NULL	NULL	130.5	mEq/L	4.65	mEq/L	8.8	mg/dL	97	mEq/L	113	mg/dL	NULL	NULL	12	mEq/L	NULL	NULL	NULL	NULL
10931276	83	M	UNKNOWN	50.2	NULL	NULL	English	NULL	CCU	8.7	K/uL	3.41	m/uL	NULL	NULL	NULL	NULL	99.5	K/uL	10.75	g/dL	14.3	%	33.6	%	NULL	NULL	NULL	NULL	NULL	NULL	142.33	mEq/L	4.4	mEq/L	8.7	mg/dL	107.67	mEq/L	99.33	mg/dL	NULL	NULL	24	mEq/L	7.32	units	26	mm Hg
10932544	91	F	WHITE	45.6	157	Medicare	English	WIDOWED	CCU	8	K/uL	3.19	m/uL	NULL	NULL	NULL	NULL	289	K/uL	9.5	g/dL	16.75	%	29.65	%	NULL	NULL	NULL	NULL	NULL	NULL	124.5	mEq/L	4.85	mEq/L	8.75	mg/dL	88	mEq/L	88	mg/dL	NULL	NULL	9.5	mEq/L	7.46	units	38.33	mm Hg
10937028	79	M	WHITE	81.6	NULL	Private	English	MARRIED	Neuro Intermediate	5.9	K/uL	3.85	m/uL	NULL	NULL	NULL	NULL	129	K/uL	12.3	g/dL	12.4	%	35.6	%	NULL	NULL	NULL	NULL	NULL	NULL	138	mEq/L	3.9	mEq/L	8.5	mg/dL	106	mEq/L	104	mg/dL	5.2	%	9	mEq/L	NULL	NULL	NULL	NULL
10940314	80	F	WHITE	72.1	NULL	Private	English	DIVORCED	TSICU	10.5	K/uL	3.29	m/uL	NULL	NULL	NULL	NULL	232	K/uL	10	g/dL	13.2	%	32.3	%	NULL	NULL	NULL	NULL	NULL	NULL	138	mEq/L	4.6	mEq/L	7.9	mg/dL	103	mEq/L	140	mg/dL	NULL	NULL	6	mEq/L	NULL	NULL	NULL	NULL
10942097	58	F	WHITE	63.05	163	Medicare	English	MARRIED	MICU/SICU	4.95	K/uL	4.05	m/uL	2.5	K/uL	2.25	K/uL	202.5	K/uL	12.5	g/dL	15.55	%	38.95	%	3.6	g/dL	2.5	g/dL	6.1	g/dL	143	mEq/L	4.4	mEq/L	8.95	mg/dL	105.5	mEq/L	80	mg/dL	4.7	%	10	mEq/L	7.35	units	53.67	mm Hg
10942537	72	M	WHITE	92	NULL	Private	English	MARRIED	MICU/SICU	7.27	K/uL	2.91	m/uL	0.87	K/uL	2.13	K/uL	33.33	K/uL	8.4	g/dL	13.77	%	24.9	%	NULL	NULL	NULL	NULL	NULL	NULL	138.67	mEq/L	4.73	mEq/L	7.87	mg/dL	104.67	mEq/L	127.67	mg/dL	NULL	NULL	12.67	mEq/L	7.28	units	49	mm Hg
10948167	84	F	BLACK/AFRICAN AMERICAN	32.4	NULL	Medicare	English	WIDOWED	MICU	8.3	K/uL	3.08	m/uL	NULL	NULL	NULL	NULL	224	K/uL	9.2	g/dL	14.4	%	30.3	%	NULL	NULL	NULL	NULL	NULL	NULL	147	mEq/L	4.8	mEq/L	9.4	mg/dL	100	mEq/L	133	mg/dL	NULL	NULL	16	mEq/L	7.35	units	68	mm Hg
10956607	87	M	UNABLE TO OBTAIN	63.8	155	Medicare	English	NULL	SICU	24.4	K/uL	3.48	m/uL	NULL	NULL	NULL	NULL	250	K/uL	10.4	g/dL	14.6	%	32.8	%	NULL	NULL	NULL	NULL	NULL	NULL	135	mEq/L	4.5	mEq/L	7.7	mg/dL	102	mEq/L	195	mg/dL	NULL	NULL	10	mEq/L	7.25	units	60	mm Hg
10959353	73	F	WHITE	70	NULL	Medicare	English	SINGLE	Neuro Intermediate	14.4	K/uL	5.41	m/uL	NULL	NULL	NULL	NULL	266	K/uL	16.7	g/dL	13.55	%	51.35	%	NULL	NULL	NULL	NULL	NULL	NULL	143.33	mEq/L	3.4	mEq/L	9.8	mg/dL	97.5	mEq/L	150.5	mg/dL	NULL	NULL	11.5	mEq/L	NULL	NULL	NULL	NULL
10964281	77	F	WHITE	53.6	160	Medicare	English	MARRIED	MICU	19.8	K/uL	4.11	m/uL	16.38	K/uL	0.86	K/uL	400	K/uL	12	g/dL	15.2	%	37.4	%	NULL	NULL	NULL	NULL	NULL	NULL	133	mEq/L	4.1	mEq/L	8.7	mg/dL	96	mEq/L	102	mg/dL	NULL	NULL	12	mEq/L	7.41	units	42	mm Hg
10964464	71	F	WHITE	117.1	163	Medicaid	English	WIDOWED	SICU	6.9	K/uL	3.45	m/uL	NULL	NULL	NULL	NULL	181	K/uL	9	g/dL	22.2	%	31.5	%	NULL	NULL	NULL	NULL	NULL	NULL	142	mEq/L	4.6	mEq/L	8.9	mg/dL	96	mEq/L	141	mg/dL	NULL	NULL	8	mEq/L	7.36	units	73	mm Hg
10967943	76	M	WHITE	75	163	Medicare	English	MARRIED	CVICU	12.77	K/uL	3.27	m/uL	6.88	K/uL	1.61	K/uL	137.33	K/uL	9.57	g/dL	13.3	%	30.53	%	NULL	NULL	NULL	NULL	NULL	NULL	137	mEq/L	4.3	mEq/L	NULL	NULL	109	mEq/L	147	mg/dL	NULL	NULL	11	mEq/L	7.38	units	36	mm Hg
10969205	90	M	WHITE	54	152	Medicare	Modern Greek (1453-)	MARRIED	MICU/SICU	14.5	K/uL	3.25	m/uL	6.9	K/uL	0.53	K/uL	136	K/uL	10.45	g/dL	15.1	%	33.3	%	2.3	g/dL	NULL	NULL	NULL	NULL	140.5	mEq/L	4.05	mEq/L	7.85	mg/dL	105.5	mEq/L	139.5	mg/dL	NULL	NULL	11	mEq/L	7.32	units	63.71	mm Hg
10970302	61	M	WHITE	69.95	180	Medicare	English	DIVORCED	CVICU	8.23	K/uL	2.65	m/uL	4.84	K/uL	1.09	K/uL	172.33	K/uL	8.83	g/dL	11.83	%	26.63	%	NULL	NULL	NULL	NULL	NULL	NULL	138	mEq/L	4.6	mEq/L	7.9	mg/dL	107	mEq/L	125	mg/dL	NULL	NULL	9.5	mEq/L	7.36	units	39.86	mm Hg
10972902	71	M	UNKNOWN	73.8	168	Medicare	English	NULL	MICU/SICU	29	K/uL	3.6	m/uL	33.14	K/uL	1.32	K/uL	151.33	K/uL	10.87	g/dL	16.17	%	33.07	%	NULL	NULL	NULL	NULL	NULL	NULL	134.33	mEq/L	4.97	mEq/L	8.03	mg/dL	100.33	mEq/L	119	mg/dL	NULL	NULL	14.67	mEq/L	7.31	units	43.6	mm Hg
10974928	66	M	WHITE	76	NULL	Other	English	SINGLE	Neuro Stepdown	10.1	K/uL	4.09	m/uL	NULL	NULL	NULL	NULL	194	K/uL	12.4	g/dL	13	%	37.1	%	NULL	NULL	NULL	NULL	NULL	NULL	144	mEq/L	3.4	mEq/L	8.8	mg/dL	108	mEq/L	137	mg/dL	NULL	NULL	18	mEq/L	NULL	NULL	NULL	NULL
10975378	91	M	WHITE - OTHER EUROPEAN	96.6	NULL	Medicare	English	MARRIED	MICU/SICU	19.95	K/uL	4.32	m/uL	NULL	NULL	NULL	NULL	116.5	K/uL	14.15	g/dL	13.1	%	42.95	%	NULL	NULL	NULL	NULL	NULL	NULL	137	mEq/L	5.15	mEq/L	8.55	mg/dL	101	mEq/L	91	mg/dL	NULL	NULL	15	mEq/L	7.34	units	51	mm Hg
10978811	64	F	WHITE	62.3	165	Private	English	MARRIED	CVICU	7.83	K/uL	2.58	m/uL	6.34	K/uL	1.75	K/uL	122.33	K/uL	8.1	g/dL	12.2	%	25.6	%	NULL	NULL	NULL	NULL	NULL	NULL	137	mEq/L	4.2	mEq/L	NULL	NULL	108.5	mEq/L	132	mg/dL	NULL	NULL	6	mEq/L	7.37	units	43.43	mm Hg
10979912	75	F	WHITE	37.5	NULL	Medicare	English	DIVORCED	MICU	6	K/uL	4.12	m/uL	NULL	NULL	NULL	NULL	295	K/uL	11.9	g/dL	13.2	%	38.9	%	NULL	NULL	NULL	NULL	NULL	NULL	141	mEq/L	3.8	mEq/L	9.1	mg/dL	95	mEq/L	152	mg/dL	NULL	NULL	18	mEq/L	7.29	units	84.5	mm Hg
10984108	71	M	WHITE	96.5	NULL	Medicare	English	SINGLE	CCU	11.63	K/uL	4.22	m/uL	NULL	NULL	NULL	NULL	189	K/uL	12.53	g/dL	15.97	%	39.43	%	3.6	g/dL	NULL	NULL	NULL	NULL	138.67	mEq/L	4.8	mEq/L	8.57	mg/dL	104.67	mEq/L	106	mg/dL	NULL	NULL	10.67	mEq/L	7.31	units	45.17	mm Hg
10986451	79	M	WHITE	79.1	NULL	Medicare	English	MARRIED	MICU	9.33	K/uL	3.93	m/uL	8.45	K/uL	1.8	K/uL	186	K/uL	10.88	g/dL	15.53	%	33.28	%	NULL	NULL	NULL	NULL	NULL	NULL	142.5	mEq/L	4.35	mEq/L	8.1	mg/dL	112.5	mEq/L	130	mg/dL	NULL	NULL	8.5	mEq/L	NULL	NULL	NULL	NULL
10987724	74	F	WHITE	86.4	NULL	Medicare	English	MARRIED	Neuro Stepdown	14.3	K/uL	3.89	m/uL	NULL	NULL	NULL	NULL	202	K/uL	11.4	g/dL	15.1	%	36.9	%	NULL	NULL	NULL	NULL	NULL	NULL	143	mEq/L	3.2	mEq/L	8.7	mg/dL	106	mEq/L	115	mg/dL	NULL	NULL	12	mEq/L	NULL	NULL	NULL	NULL
10988727	66	M	BLACK/AFRICAN AMERICAN	78.4	168	Medicare	English	MARRIED	MICU/SICU	11.95	K/uL	3.88	m/uL	10.6	K/uL	0.83	K/uL	164.5	K/uL	10.85	g/dL	14.15	%	35	%	NULL	NULL	NULL	NULL	NULL	NULL	127	mEq/L	4.8	mEq/L	8.5	mg/dL	90	mEq/L	115	mg/dL	NULL	NULL	7	mEq/L	7.3	units	70.67	mm Hg
10993123	61	F	UNKNOWN	109.1	NULL	Medicaid	English	NULL	MICU	7.73	K/uL	2.68	m/uL	6.06	K/uL	0.84	K/uL	226.67	K/uL	7.17	g/dL	17.77	%	24.1	%	3.5	g/dL	NULL	NULL	NULL	NULL	139.5	mEq/L	3.83	mEq/L	8.88	mg/dL	87.5	mEq/L	89.75	mg/dL	NULL	NULL	14	mEq/L	7.42	units	68	mm Hg
11001264	56	M	WHITE	103	180	Private	English	MARRIED	MICU/SICU	10.6	K/uL	3.57	m/uL	8.63	K/uL	1.06	K/uL	297	K/uL	11	g/dL	11.7	%	33.3	%	NULL	NULL	NULL	NULL	NULL	NULL	137	mEq/L	4.1	mEq/L	8.8	mg/dL	93	mEq/L	109	mg/dL	NULL	NULL	15	mEq/L	NULL	NULL	NULL	NULL
11008656	55	M	WHITE	104.5	NULL	Medicaid	English	MARRIED	SICU	17.1	K/uL	4.2	m/uL	NULL	NULL	NULL	NULL	219	K/uL	11.7	g/dL	14.1	%	35.4	%	NULL	NULL	NULL	NULL	NULL	NULL	140	mEq/L	3.9	mEq/L	8.4	mg/dL	107	mEq/L	168	mg/dL	NULL	NULL	15	mEq/L	NULL	NULL	NULL	NULL
11009864	73	M	UNABLE TO OBTAIN	54	170	Medicare	English	NULL	CCU	11.1	K/uL	3.44	m/uL	7.77	K/uL	1.3	K/uL	113.17	K/uL	9.4	g/dL	17.3	%	29.37	%	2	g/dL	NULL	NULL	NULL	NULL	140.2	mEq/L	5.7	mEq/L	6.16	mg/dL	111	mEq/L	244.6	mg/dL	NULL	NULL	15.2	mEq/L	7.31	units	31.6	mm Hg
11017644	75	F	WHITE	67.2	157	Medicare	English	SINGLE	TSICU	3.57	K/uL	3.23	m/uL	NULL	NULL	NULL	NULL	96.83	K/uL	9.3	g/dL	18.82	%	30.9	%	NULL	NULL	NULL	NULL	NULL	NULL	145.25	mEq/L	3.95	mEq/L	8.05	mg/dL	108.5	mEq/L	110.25	mg/dL	NULL	NULL	24.5	mEq/L	7.1	units	39	mm Hg
11020519	74	F	WHITE	59.15	160	Medicare	English	MARRIED	MICU/SICU	13	K/uL	2.14	m/uL	14.9	K/uL	0.49	K/uL	92	K/uL	6.75	g/dL	18.1	%	22.35	%	NULL	NULL	NULL	NULL	NULL	NULL	136.5	mEq/L	4.45	mEq/L	9.35	mg/dL	100	mEq/L	123.5	mg/dL	NULL	NULL	13	mEq/L	7.28	units	72	mm Hg
11022511	76	F	WHITE	66.6	152	Medicare	English	MARRIED	CVICU	20.83	K/uL	4.44	m/uL	13.23	K/uL	5.54	K/uL	201.67	K/uL	10.33	g/dL	23.9	%	35.15	%	NULL	NULL	NULL	NULL	NULL	NULL	135	mEq/L	5.2	mEq/L	NULL	NULL	109	mEq/L	139	mg/dL	NULL	NULL	12.5	mEq/L	7.36	units	34.22	mm Hg
11023079	35	M	WHITE	63.7	NULL	Medicare	English	SINGLE	Neuro Intermediate	8.05	K/uL	4.75	m/uL	6.34	K/uL	1.19	K/uL	217	K/uL	11.8	g/dL	15.25	%	37.25	%	NULL	NULL	NULL	NULL	NULL	NULL	139.5	mEq/L	3.5	mEq/L	8.65	mg/dL	102.5	mEq/L	118.5	mg/dL	NULL	NULL	11	mEq/L	NULL	NULL	NULL	NULL
11027610	60	M	WHITE	74.7	NULL	Other	English	MARRIED	MICU	11.45	K/uL	2.53	m/uL	9.18	K/uL	1.59	K/uL	125.5	K/uL	9	g/dL	16.45	%	27.15	%	2.4	g/dL	NULL	NULL	NULL	NULL	122.4	mEq/L	4.23	mEq/L	8.03	mg/dL	90	mEq/L	107	mg/dL	NULL	NULL	13.67	mEq/L	NULL	NULL	NULL	NULL
11034210	74	M	WHITE	81.2	NULL	Other	English	DIVORCED	CVICU	5.33	K/uL	2.56	m/uL	4.58	K/uL	0.46	K/uL	154	K/uL	7.4	g/dL	17.67	%	22.27	%	2.2	g/dL	NULL	NULL	NULL	NULL	118.25	mEq/L	4.65	mEq/L	7.45	mg/dL	87.5	mEq/L	95	mg/dL	NULL	NULL	9	mEq/L	7.37	units	43	mm Hg
11034443	88	F	WHITE	61.6	NULL	Medicare	English	WIDOWED	TSICU	19.6	K/uL	3.38	m/uL	NULL	NULL	NULL	NULL	179	K/uL	9.9	g/dL	14.5	%	31.5	%	NULL	NULL	NULL	NULL	NULL	NULL	131	mEq/L	4.05	mEq/L	8.1	mg/dL	97.5	mEq/L	117.5	mg/dL	NULL	NULL	10.5	mEq/L	NULL	NULL	NULL	NULL
11040709	73	F	WHITE	65	160	Medicare	English	DIVORCED	TSICU	19.63	K/uL	3.49	m/uL	NULL	NULL	NULL	NULL	242.33	K/uL	8.6	g/dL	17.37	%	29.07	%	NULL	NULL	NULL	NULL	NULL	NULL	140.5	mEq/L	3.95	mEq/L	8.55	mg/dL	105	mEq/L	128	mg/dL	NULL	NULL	16.5	mEq/L	7.22	units	51.6	mm Hg
11044484	87	F	WHITE	58.9	NULL	Medicare	Italian	WIDOWED	CVICU	10.4	K/uL	4.17	m/uL	NULL	NULL	NULL	NULL	115	K/uL	11.9	g/dL	17.1	%	40.5	%	NULL	NULL	NULL	NULL	NULL	NULL	141.5	mEq/L	4.3	mEq/L	NULL	NULL	95	mEq/L	96.5	mg/dL	NULL	NULL	15	mEq/L	NULL	NULL	NULL	NULL
11045637	64	M	WHITE	76.65	NULL	Private	English	MARRIED	TSICU	11.8	K/uL	3.67	m/uL	NULL	NULL	NULL	NULL	136	K/uL	11	g/dL	13.5	%	35.6	%	NULL	NULL	NULL	NULL	NULL	NULL	136.5	mEq/L	4.45	mEq/L	7.85	mg/dL	103.5	mEq/L	143.5	mg/dL	NULL	NULL	12	mEq/L	NULL	NULL	NULL	NULL
11050568	63	M	WHITE	104.5	178	Private	English	MARRIED	TSICU	19.1	K/uL	4.18	m/uL	15.11	K/uL	1.45	K/uL	158	K/uL	13	g/dL	14	%	39.9	%	NULL	NULL	NULL	NULL	NULL	NULL	141	mEq/L	5.05	mEq/L	8.6	mg/dL	102	mEq/L	123	mg/dL	NULL	NULL	15.5	mEq/L	7.31	units	52.67	mm Hg
11060603	88	F	WHITE	70	160	Medicare	English	WIDOWED	CCU	NULL	NULL	NULL	NULL	NULL	NULL	NULL	NULL	NULL	NULL	NULL	NULL	NULL	NULL	NULL	NULL	NULL	NULL	NULL	NULL	NULL	NULL	NULL	NULL	NULL	NULL	NULL	NULL	NULL	NULL	NULL	NULL	NULL	NULL	NULL	NULL	NULL	NULL	NULL	NULL
11062235	77	M	WHITE	50	152	Medicare	English	WIDOWED	SICU	9.17	K/uL	3.12	m/uL	NULL	NULL	NULL	NULL	247	K/uL	9.2	g/dL	14.17	%	27.83	%	NULL	NULL	NULL	NULL	NULL	NULL	128	mEq/L	4.83	mEq/L	8.83	mg/dL	90.67	mEq/L	140.33	mg/dL	NULL	NULL	12.33	mEq/L	7.33	units	56	mm Hg
11063798	77	M	WHITE	79.4333	178	Medicare	English	MARRIED	MICU/SICU	20.25	K/uL	3.92	m/uL	18.3	K/uL	0.51	K/uL	85.5	K/uL	12.8	g/dL	12.65	%	39	%	3.35	g/dL	NULL	NULL	NULL	NULL	142.5	mEq/L	4.4	mEq/L	8.65	mg/dL	106	mEq/L	116	mg/dL	NULL	NULL	15.5	mEq/L	7.37	units	44	mm Hg
11064691	69	M	WHITE	109.9	180	Medicare	English	DIVORCED	SICU	16.4	K/uL	4.56	m/uL	NULL	NULL	NULL	NULL	254	K/uL	14.5	g/dL	12.5	%	40.2	%	NULL	NULL	NULL	NULL	NULL	NULL	138.33	mEq/L	3.7	mEq/L	9.4	mg/dL	104.67	mEq/L	212	mg/dL	NULL	NULL	16	mEq/L	7.45	units	33	mm Hg
11066748	71	M	WHITE	116.8	175	Private	English	MARRIED	SICU	12.28	K/uL	4.47	m/uL	NULL	NULL	NULL	NULL	150.83	K/uL	13.85	g/dL	14.17	%	41.53	%	2.7	g/dL	NULL	NULL	NULL	NULL	141.33	mEq/L	3.67	mEq/L	8.24	mg/dL	104.17	mEq/L	136.17	mg/dL	NULL	NULL	12.5	mEq/L	7.35	units	42.08	mm Hg
11078706	70	M	WHITE	66.8	170	Medicare	English	MARRIED	CCU	12.23	K/uL	3.75	m/uL	7.98	K/uL	1.44	K/uL	141.25	K/uL	11.63	g/dL	13.08	%	33.75	%	NULL	NULL	NULL	NULL	NULL	NULL	136	mEq/L	4.1	mEq/L	8.4	mg/dL	107	mEq/L	135.5	mg/dL	NULL	NULL	13.67	mEq/L	7.38	units	37.86	mm Hg
11079344	71	F	UNKNOWN	75.3	NULL	Medicare	English	NULL	SICU	6.9	K/uL	3.87	m/uL	NULL	NULL	NULL	NULL	163	K/uL	11.1	g/dL	13.8	%	33.85	%	NULL	NULL	NULL	NULL	NULL	NULL	136	mEq/L	3.7	mEq/L	8.35	mg/dL	107	mEq/L	161.5	mg/dL	NULL	NULL	7.5	mEq/L	7.36	units	37	mm Hg
11079497	87	M	WHITE	102.8	183	Medicare	English	SINGLE	CCU	14.27	K/uL	3.94	m/uL	NULL	NULL	NULL	NULL	281.33	K/uL	9.83	g/dL	15.9	%	33.47	%	NULL	NULL	NULL	NULL	NULL	NULL	135	mEq/L	4.63	mEq/L	8.43	mg/dL	97	mEq/L	119.67	mg/dL	NULL	NULL	12.67	mEq/L	7.27	units	57	mm Hg
11086980	83	M	WHITE	78.6	183	Medicare	English	WIDOWED	Neuro SICU	10.8	K/uL	4.22	m/uL	NULL	NULL	NULL	NULL	196.5	K/uL	10.4	g/dL	18.7	%	34.25	%	NULL	NULL	NULL	NULL	NULL	NULL	141.67	mEq/L	4.47	mEq/L	8.57	mg/dL	103	mEq/L	144.33	mg/dL	NULL	NULL	20.67	mEq/L	7.44	units	28.75	mm Hg
11087642	67	M	UNKNOWN	76.55	173	Medicare	English	NULL	CVICU	13.95	K/uL	3.42	m/uL	10.59	K/uL	2.52	K/uL	190.5	K/uL	9.25	g/dL	14.08	%	29.96	%	NULL	NULL	NULL	NULL	NULL	NULL	137	mEq/L	4.83	mEq/L	NULL	NULL	105	mEq/L	111	mg/dL	NULL	NULL	9.5	mEq/L	7.32	units	52.5	mm Hg
11088122	63	F	WHITE	62.7	NULL	Private	English	DIVORCED	MICU/SICU	0.2	K/uL	2.48	m/uL	0.11	K/uL	0.07	K/uL	297	K/uL	7.6	g/dL	15.3	%	22.8	%	2.6	g/dL	NULL	NULL	NULL	NULL	136.5	mEq/L	4.05	mEq/L	9.9	mg/dL	99.5	mEq/L	163	mg/dL	NULL	NULL	16	mEq/L	7.43	units	33	mm Hg
11089729	92	F	UNKNOWN	89.1	157	Medicare	English	NULL	MICU/SICU	10.77	K/uL	3.2	m/uL	10.03	K/uL	1.57	K/uL	221.67	K/uL	8.93	g/dL	14.6	%	28.83	%	NULL	NULL	NULL	NULL	NULL	NULL	147.33	mEq/L	3.7	mEq/L	8.43	mg/dL	106.67	mEq/L	134	mg/dL	NULL	NULL	16.33	mEq/L	7.39	units	44.75	mm Hg
11095755	70	M	WHITE	83.9	NULL	Medicare	English	SINGLE	Neuro Intermediate	6.6	K/uL	3.79	m/uL	NULL	NULL	NULL	NULL	166	K/uL	11.7	g/dL	12.1	%	34.5	%	NULL	NULL	NULL	NULL	NULL	NULL	138	mEq/L	4.2	mEq/L	8.1	mg/dL	101	mEq/L	88	mg/dL	NULL	NULL	11	mEq/L	NULL	NULL	NULL	NULL
11105311	62	M	WHITE	122.4	NULL	Medicare	English	WIDOWED	CCU	8.92	K/uL	3.07	m/uL	8.32	K/uL	1.37	K/uL	126	K/uL	10.2	g/dL	18.38	%	32.46	%	NULL	NULL	NULL	NULL	NULL	NULL	136	mEq/L	4.38	mEq/L	8.18	mg/dL	95.25	mEq/L	107.33	mg/dL	NULL	NULL	10	mEq/L	7.35	units	56.4	mm Hg
11107643	70	F	BLACK/AFRICAN AMERICAN	102.6	145	Medicare	English	SINGLE	TSICU	NULL	NULL	NULL	NULL	NULL	NULL	NULL	NULL	NULL	NULL	NULL	NULL	NULL	NULL	NULL	NULL	NULL	NULL	NULL	NULL	NULL	NULL	NULL	NULL	NULL	NULL	NULL	NULL	NULL	NULL	NULL	NULL	NULL	NULL	NULL	NULL	NULL	NULL	NULL	NULL
11123309	82	M	WHITE	73.1	NULL	Medicare	English	MARRIED	SICU	8.85	K/uL	3.7	m/uL	5.92	K/uL	1.41	K/uL	155.5	K/uL	11.15	g/dL	14	%	34.1	%	3.75	g/dL	NULL	NULL	NULL	NULL	140	mEq/L	4.6	mEq/L	8.4	mg/dL	104	mEq/L	88	mg/dL	NULL	NULL	14.5	mEq/L	NULL	NULL	NULL	NULL
11124675	73	F	WHITE	143	NULL	Medicare	English	SINGLE	MICU/SICU	11.8	K/uL	4.41	m/uL	10.8	K/uL	0.4	K/uL	181	K/uL	10.6	g/dL	16.75	%	36.55	%	3.5	g/dL	NULL	NULL	NULL	NULL	141	mEq/L	3.77	mEq/L	7.93	mg/dL	98	mEq/L	126.67	mg/dL	NULL	NULL	17.67	mEq/L	7.25	units	65.25	mm Hg
11131318	94	F	WHITE	62.5	NULL	Medicare	English	WIDOWED	CCU	9.2	K/uL	3.87	m/uL	NULL	NULL	NULL	NULL	100	K/uL	10.4	g/dL	18.1	%	36.1	%	NULL	NULL	NULL	NULL	NULL	NULL	136	mEq/L	4.34	mEq/L	11.13	mg/dL	82.8	mEq/L	92.33	mg/dL	NULL	NULL	10	mEq/L	7.42	units	83.83	mm Hg
11132535	67	F	WHITE	101.9	180	Medicaid	English	WIDOWED	CCU	7.4	K/uL	4.37	m/uL	5.43	K/uL	1.36	K/uL	181.5	K/uL	10.1	g/dL	22.8	%	35.3	%	3.65	g/dL	NULL	NULL	NULL	NULL	144.33	mEq/L	3.7	mEq/L	8.77	mg/dL	100.33	mEq/L	105.67	mg/dL	NULL	NULL	14.33	mEq/L	7.32	units	65	mm Hg
11134357	49	F	NATIVE HAWAIIAN OR OTHER PACIFIC ISLANDER	80.8	NULL	Medicaid	English	SINGLE	MICU/SICU	5.1	K/uL	3.65	m/uL	NULL	NULL	NULL	NULL	74	K/uL	12.5	g/dL	14.7	%	36.4	%	NULL	NULL	NULL	NULL	NULL	NULL	133	mEq/L	3.3	mEq/L	8.4	mg/dL	98	mEq/L	108	mg/dL	NULL	NULL	13	mEq/L	7.46	units	38	mm Hg
11137154	75	M	WHITE	62.6	168	Medicare	English	DIVORCED	SICU	9.45	K/uL	3.26	m/uL	6.63	K/uL	1.89	K/uL	261.5	K/uL	8.95	g/dL	15.95	%	27.9	%	2.6	g/dL	NULL	NULL	NULL	NULL	131	mEq/L	4.1	mEq/L	NULL	NULL	93	mEq/L	95	mg/dL	NULL	NULL	15	mEq/L	NULL	NULL	NULL	NULL
11137816	79	F	WHITE	75	165	Medicare	English	WIDOWED	MICU	16.2	K/uL	2.68	m/uL	14.44	K/uL	0.3	K/uL	261	K/uL	8.46	g/dL	16.3	%	24.56	%	2.5	g/dL	NULL	NULL	NULL	NULL	130.5	mEq/L	5.83	mEq/L	7.6	mg/dL	97.17	mEq/L	101.5	mg/dL	NULL	NULL	24.5	mEq/L	7.3	units	22.75	mm Hg
11140549	53	F	WHITE	83.9	NULL	Private	English	DIVORCED	Neuro Intermediate	17.7	K/uL	3.89	m/uL	NULL	NULL	NULL	NULL	137	K/uL	12.4	g/dL	12.7	%	36.8	%	NULL	NULL	NULL	NULL	NULL	NULL	139	mEq/L	4	mEq/L	7.9	mg/dL	107	mEq/L	110	mg/dL	NULL	NULL	13	mEq/L	NULL	NULL	NULL	NULL
11141995	57	F	WHITE	50	157	Medicaid	English	DIVORCED	CVICU	15.5	K/uL	2.95	m/uL	8.35	K/uL	2.27	K/uL	145.33	K/uL	8.6	g/dL	14.83	%	25.4	%	NULL	NULL	NULL	NULL	NULL	NULL	136	mEq/L	3.85	mEq/L	NULL	NULL	105	mEq/L	91	mg/dL	NULL	NULL	12	mEq/L	7.41	units	38.4	mm Hg
11146519	74	M	WHITE	90	170	Medicare	English	MARRIED	MICU	12.5	K/uL	3.59	m/uL	7.97	K/uL	1.87	K/uL	288	K/uL	8	g/dL	25.43	%	28.53	%	1.85	g/dL	NULL	NULL	NULL	NULL	141.67	mEq/L	5.77	mEq/L	7.2	mg/dL	103	mEq/L	103.33	mg/dL	NULL	NULL	10.67	mEq/L	7.42	units	48.75	mm Hg
11148780	77	F	WHITE	88.6	161	Medicare	English	MARRIED	Neuro Intermediate	11.5	K/uL	3.48	m/uL	NULL	NULL	NULL	NULL	182	K/uL	10.6	g/dL	12.8	%	32.5	%	NULL	NULL	NULL	NULL	NULL	NULL	147	mEq/L	4.2	mEq/L	8.3	mg/dL	110	mEq/L	184	mg/dL	NULL	NULL	14	mEq/L	NULL	NULL	NULL	NULL
11150215	73	F	WHITE	99.2	NULL	Medicare	English	WIDOWED	MICU/SICU	17	K/uL	2.26	m/uL	15.44	K/uL	0.92	K/uL	77	K/uL	7.3	g/dL	18.25	%	22.25	%	2.1	g/dL	NULL	NULL	NULL	NULL	133	mEq/L	3	mEq/L	7.8	mg/dL	95	mEq/L	88	mg/dL	NULL	NULL	12	mEq/L	7.42	units	44	mm Hg
11155160	79	M	WHITE	71.6	NULL	Medicare	English	SINGLE	MICU/SICU	0.7	K/uL	3.7	m/uL	0.31	K/uL	0.18	K/uL	122	K/uL	11.2	g/dL	14.3	%	34.1	%	NULL	NULL	NULL	NULL	NULL	NULL	141	mEq/L	3.8	mEq/L	8.4	mg/dL	101	mEq/L	158	mg/dL	NULL	NULL	11	mEq/L	7.38	units	57	mm Hg
11164952	43	M	HISPANIC/LATINO - PUERTO RICAN	85.4	NULL	Medicaid	English	SINGLE	MICU/SICU	9.1	K/uL	4.27	m/uL	NULL	NULL	NULL	NULL	92	K/uL	9.2	g/dL	21.35	%	32.75	%	NULL	NULL	NULL	NULL	NULL	NULL	137	mEq/L	3.15	mEq/L	8.1	mg/dL	100	mEq/L	90	mg/dL	NULL	NULL	14	mEq/L	7.47	units	36	mm Hg
11168639	69	F	WHITE	87.8	165	Medicare	English	DIVORCED	CVICU	15.17	K/uL	3.2	m/uL	NULL	NULL	NULL	NULL	166.33	K/uL	9.68	g/dL	14.47	%	29.02	%	NULL	NULL	NULL	NULL	NULL	NULL	140.67	mEq/L	4.3	mEq/L	7.7	mg/dL	104.33	mEq/L	137.33	mg/dL	NULL	NULL	11.33	mEq/L	7.33	units	47	mm Hg
11170354	75	M	WHITE	113.4	188	Medicare	English	MARRIED	MICU/SICU	11.85	K/uL	4.19	m/uL	NULL	NULL	NULL	NULL	257	K/uL	12	g/dL	13.4	%	37.85	%	NULL	NULL	NULL	NULL	NULL	NULL	145	mEq/L	4.35	mEq/L	9.7	mg/dL	102.5	mEq/L	94	mg/dL	NULL	NULL	12	mEq/L	NULL	NULL	NULL	NULL
11171196	76	M	WHITE	92.85	173	Medicare	English	SINGLE	CCU	23.95	K/uL	4.16	m/uL	18.89	K/uL	2.68	K/uL	191.75	K/uL	12.48	g/dL	13.93	%	38.3	%	3.9	g/dL	NULL	NULL	NULL	NULL	142.67	mEq/L	4.48	mEq/L	8.37	mg/dL	110	mEq/L	220.67	mg/dL	NULL	NULL	16.67	mEq/L	7.31	units	36.71	mm Hg
11176767	64	M	UNKNOWN	66.8	170	Medicare	English	NULL	Neuro Intermediate	13.9	K/uL	3.18	m/uL	NULL	NULL	NULL	NULL	298	K/uL	9.3	g/dL	12.6	%	29	%	NULL	NULL	NULL	NULL	NULL	NULL	138	mEq/L	4	mEq/L	8.2	mg/dL	103	mEq/L	137	mg/dL	NULL	NULL	13	mEq/L	NULL	NULL	NULL	NULL
11178510	83	F	WHITE	89.3	NULL	Medicare	English	SINGLE	TSICU	10.48	K/uL	2.9	m/uL	NULL	NULL	NULL	NULL	257.75	K/uL	8.58	g/dL	14.2	%	27.53	%	NULL	NULL	NULL	NULL	NULL	NULL	144	mEq/L	3.4	mEq/L	8.2	mg/dL	105	mEq/L	119	mg/dL	NULL	NULL	15	mEq/L	NULL	NULL	NULL	NULL
11178609	79	F	WHITE	67	157	Medicare	English	WIDOWED	TSICU	14.6	K/uL	3.17	m/uL	NULL	NULL	NULL	NULL	206	K/uL	9.9	g/dL	15.1	%	31.5	%	NULL	NULL	NULL	NULL	NULL	NULL	145	mEq/L	4.6	mEq/L	9.6	mg/dL	110	mEq/L	90	mg/dL	NULL	NULL	13	mEq/L	NULL	NULL	NULL	NULL
11180959	66	F	OTHER	60.85	NULL	Medicare	English	MARRIED	SICU	7	K/uL	3.58	m/uL	NULL	NULL	NULL	NULL	137	K/uL	10.3	g/dL	13.93	%	32.13	%	NULL	NULL	NULL	NULL	NULL	NULL	138	mEq/L	4.45	mEq/L	8.75	mg/dL	101.5	mEq/L	119.5	mg/dL	NULL	NULL	14	mEq/L	NULL	NULL	NULL	NULL
11181460	83	F	BLACK/AFRICAN AMERICAN	74.5	NULL	Medicare	English	WIDOWED	MICU/SICU	7.4	K/uL	2.95	m/uL	NULL	NULL	NULL	NULL	235	K/uL	8.2	g/dL	18.6	%	27.5	%	NULL	NULL	NULL	NULL	NULL	NULL	148	mEq/L	3.9	mEq/L	9.55	mg/dL	108	mEq/L	136.5	mg/dL	NULL	NULL	12.5	mEq/L	7.39	units	63.5	mm Hg
11186968	79	F	WHITE	55.95	157	Medicare	English	NULL	MICU	15.2	K/uL	3.15	m/uL	NULL	NULL	NULL	NULL	391	K/uL	9.35	g/dL	12.4	%	31	%	NULL	NULL	NULL	NULL	NULL	NULL	139	mEq/L	5	mEq/L	8.95	mg/dL	96	mEq/L	135.5	mg/dL	NULL	NULL	11.5	mEq/L	7.26	units	85.67	mm Hg
11193771	72	F	WHITE	62.6	NULL	Medicare	English	DIVORCED	Neuro Intermediate	12.6	K/uL	3.88	m/uL	NULL	NULL	NULL	NULL	188	K/uL	10.8	g/dL	14.2	%	34	%	NULL	NULL	NULL	NULL	NULL	NULL	139	mEq/L	4.1	mEq/L	8.9	mg/dL	105	mEq/L	153	mg/dL	NULL	NULL	12	mEq/L	NULL	NULL	NULL	NULL
11196822	85	M	WHITE	72.5	NULL	Medicare	English	DIVORCED	TSICU	15.5	K/uL	3.38	m/uL	NULL	NULL	NULL	NULL	194	K/uL	10.15	g/dL	17.35	%	31.25	%	NULL	NULL	NULL	NULL	NULL	NULL	141.5	mEq/L	4.95	mEq/L	7.7	mg/dL	105	mEq/L	233.5	mg/dL	NULL	NULL	13	mEq/L	7.27	units	54.6	mm Hg
11200811	74	F	WHITE	89	NULL	Medicare	English	MARRIED	MICU	5.7	K/uL	2.81	m/uL	4.35	K/uL	0.5	K/uL	215	K/uL	9.3	g/dL	14.1	%	29.3	%	3.1	g/dL	NULL	NULL	NULL	NULL	141	mEq/L	3.45	mEq/L	8.6	mg/dL	100.5	mEq/L	139.5	mg/dL	NULL	NULL	12	mEq/L	NULL	NULL	NULL	NULL
11202762	81	F	WHITE	57.8	NULL	Medicare	English	WIDOWED	MICU/SICU	NULL	NULL	NULL	NULL	NULL	NULL	NULL	NULL	NULL	NULL	NULL	NULL	NULL	NULL	NULL	NULL	NULL	NULL	NULL	NULL	NULL	NULL	122.67	mEq/L	3.73	mEq/L	8.1	mg/dL	79.33	mEq/L	117.33	mg/dL	NULL	NULL	7	mEq/L	NULL	NULL	NULL	NULL
11204531	77	F	OTHER	74	NULL	Medicare	English	MARRIED	MICU/SICU	17.5	K/uL	3.42	m/uL	NULL	NULL	NULL	NULL	349	K/uL	7.1	g/dL	19.95	%	24.2	%	NULL	NULL	NULL	NULL	NULL	NULL	140	mEq/L	4.25	mEq/L	9.3	mg/dL	103.5	mEq/L	108.5	mg/dL	NULL	NULL	12.5	mEq/L	NULL	NULL	NULL	NULL
11206461	90	M	WHITE	97	168	Medicare	English	MARRIED	MICU/SICU	6.75	K/uL	3.2	m/uL	NULL	NULL	NULL	NULL	254	K/uL	10.5	g/dL	13.55	%	32.45	%	NULL	NULL	NULL	NULL	NULL	NULL	140.5	mEq/L	3.35	mEq/L	8.95	mg/dL	96	mEq/L	115	mg/dL	NULL	NULL	15.5	mEq/L	7.42	units	54	mm Hg
11208334	69	F	BLACK/AFRICAN AMERICAN	75.8333	157	Medicaid	English	SINGLE	SICU	7.93	K/uL	3.48	m/uL	NULL	NULL	NULL	NULL	231	K/uL	10.67	g/dL	14.4	%	32.13	%	NULL	NULL	NULL	NULL	NULL	NULL	136	mEq/L	3.73	mEq/L	7.8	mg/dL	101.67	mEq/L	119	mg/dL	NULL	NULL	11.33	mEq/L	7.37	units	46	mm Hg
11210521	92	F	BLACK/AFRICAN AMERICAN	64.5	NULL	Medicare	English	WIDOWED	MICU/SICU	6.05	K/uL	2.81	m/uL	NULL	NULL	NULL	NULL	187	K/uL	7.7	g/dL	16.95	%	25.1	%	NULL	NULL	NULL	NULL	NULL	NULL	141	mEq/L	3.8	mEq/L	8.6	mg/dL	106	mEq/L	106	mg/dL	NULL	NULL	13	mEq/L	NULL	NULL	NULL	NULL
11210923	91	M	WHITE	87	NULL	Medicare	English	WIDOWED	Neuro SICU	15.85	K/uL	3.4	m/uL	13.33	K/uL	0.93	K/uL	79	K/uL	10.65	g/dL	14.55	%	33.05	%	3.4	g/dL	NULL	NULL	NULL	NULL	135	mEq/L	3.95	mEq/L	9.15	mg/dL	97	mEq/L	122	mg/dL	NULL	NULL	15	mEq/L	7.35	units	41.75	mm Hg
11213682	57	F	WHITE	84.1	147	Medicare	English	SINGLE	MICU	22.13	K/uL	3.81	m/uL	26.7	K/uL	0.91	K/uL	128.75	K/uL	10.47	g/dL	15.7	%	33.83	%	NULL	NULL	NULL	NULL	NULL	NULL	138	mEq/L	4.27	mEq/L	7.83	mg/dL	101	mEq/L	157.33	mg/dL	NULL	NULL	17	mEq/L	7.22	units	52.67	mm Hg
11213918	61	M	WHITE	168.3	178	Medicaid	English	SINGLE	MICU	9.6	K/uL	4.05	m/uL	6.45	K/uL	1.5	K/uL	196	K/uL	13.4	g/dL	15.2	%	44	%	3.2	g/dL	NULL	NULL	NULL	NULL	129.25	mEq/L	4.73	mEq/L	8.23	mg/dL	91.75	mEq/L	111.75	mg/dL	NULL	NULL	12.25	mEq/L	7.24	units	85.71	mm Hg
11225885	74	F	PATIENT DECLINED TO ANSWER	86.3	157	Medicare	English	MARRIED	MICU	34.48	K/uL	3.04	m/uL	32.37	K/uL	1.53	K/uL	222.6	K/uL	9.36	g/dL	15.34	%	27.78	%	2.5	g/dL	NULL	NULL	NULL	NULL	144.67	mEq/L	4.57	mEq/L	6.4	mg/dL	107	mEq/L	243.67	mg/dL	NULL	NULL	13.67	mEq/L	7.23	units	58	mm Hg
11226572	63	F	BLACK/AFRICAN AMERICAN	80.4	NULL	Medicaid	English	SINGLE	MICU	3.55	K/uL	3.36	m/uL	NULL	NULL	NULL	NULL	194	K/uL	9.6	g/dL	13.55	%	30.4	%	NULL	NULL	NULL	NULL	NULL	NULL	139.5	mEq/L	3.95	mEq/L	9.2	mg/dL	100.5	mEq/L	83	mg/dL	NULL	NULL	15.5	mEq/L	NULL	NULL	NULL	NULL
11227795	71	F	OTHER	61.2	NULL	Private	English	DIVORCED	SICU	10.35	K/uL	3.62	m/uL	NULL	NULL	NULL	NULL	182	K/uL	11.35	g/dL	13.1	%	33.05	%	NULL	NULL	NULL	NULL	NULL	NULL	136	mEq/L	4.1	mEq/L	8.77	mg/dL	100.67	mEq/L	136	mg/dL	NULL	NULL	13	mEq/L	NULL	NULL	NULL	NULL
11228986	90	F	WHITE	52	NULL	Medicare	English	WIDOWED	TSICU	12.4	K/uL	2.63	m/uL	11.07	K/uL	0.62	K/uL	222	K/uL	8.35	g/dL	17.1	%	26.45	%	NULL	NULL	NULL	NULL	NULL	NULL	138.33	mEq/L	4.67	mEq/L	7.07	mg/dL	106	mEq/L	111.33	mg/dL	NULL	NULL	19	mEq/L	7.32	units	37.75	mm Hg
11239929	73	M	WHITE	77.3	180	Medicare	English	MARRIED	MICU	8.43	K/uL	4.01	m/uL	NULL	NULL	NULL	NULL	122.33	K/uL	13.83	g/dL	12.75	%	41.03	%	3.1	g/dL	NULL	NULL	NULL	NULL	137.5	mEq/L	4.83	mEq/L	7.8	mg/dL	108	mEq/L	106.75	mg/dL	NULL	NULL	12.25	mEq/L	7.43	units	37	mm Hg
11240446	71	F	UNKNOWN	63.5	NULL	Medicare	English	NULL	Neuro Intermediate	9.4	K/uL	4.44	m/uL	NULL	NULL	NULL	NULL	201.33	K/uL	13.43	g/dL	13.47	%	40.9	%	4.2	g/dL	NULL	NULL	NULL	NULL	138.33	mEq/L	4.6	mEq/L	9.75	mg/dL	98	mEq/L	105.33	mg/dL	NULL	NULL	16	mEq/L	NULL	NULL	NULL	NULL
11242742	89	F	HISPANIC/LATINO - CUBAN	102.9	147	Medicare	Spanish	WIDOWED	MICU	7.9	K/uL	3.64	m/uL	NULL	NULL	NULL	NULL	194	K/uL	11.7	g/dL	13.9	%	38.3	%	NULL	NULL	NULL	NULL	NULL	NULL	145	mEq/L	4.5	mEq/L	9.3	mg/dL	106	mEq/L	191	mg/dL	NULL	NULL	13	mEq/L	7.38	units	52.5	mm Hg
11245362	73	F	WHITE	51	150	Medicare	English	MARRIED	MICU/SICU	17.6	K/uL	2.68	m/uL	NULL	NULL	NULL	NULL	175.33	K/uL	7.33	g/dL	18.5	%	23.73	%	NULL	NULL	NULL	NULL	NULL	NULL	144.33	mEq/L	3.93	mEq/L	8.9	mg/dL	104.67	mEq/L	143.33	mg/dL	NULL	NULL	13.67	mEq/L	7.47	units	45	mm Hg
11264889	88	F	WHITE	69.15	NULL	Medicare	English	MARRIED	CCU	10.5	K/uL	3.72	m/uL	NULL	NULL	NULL	NULL	306	K/uL	11.4	g/dL	13.5	%	36.7	%	NULL	NULL	NULL	NULL	NULL	NULL	129.5	mEq/L	3.6	mEq/L	8.65	mg/dL	82.5	mEq/L	123.5	mg/dL	NULL	NULL	10.5	mEq/L	7.21	units	96.5	mm Hg
11270748	70	M	WHITE	93.2	180	Medicare	English	MARRIED	MICU	13.78	K/uL	3.31	m/uL	11.84	K/uL	1.05	K/uL	293.25	K/uL	6.43	g/dL	28.4	%	22.2	%	3.8	g/dL	NULL	NULL	NULL	NULL	136.5	mEq/L	3.63	mEq/L	7.88	mg/dL	100.75	mEq/L	138.75	mg/dL	NULL	NULL	14.5	mEq/L	7.34	units	41	mm Hg
11270948	94	F	WHITE	86.1	NULL	Medicare	English	WIDOWED	MICU	21.7	K/uL	3.93	m/uL	NULL	NULL	NULL	NULL	199	K/uL	10.1	g/dL	18.1	%	35.4	%	NULL	NULL	NULL	NULL	NULL	NULL	139	mEq/L	4.2	mEq/L	8.5	mg/dL	101	mEq/L	133	mg/dL	NULL	NULL	15	mEq/L	NULL	NULL	NULL	NULL
11280416	75	M	WHITE - OTHER EUROPEAN	82.4	NULL	Medicare	English	MARRIED	MICU	18.38	K/uL	4.23	m/uL	18.06	K/uL	1.59	K/uL	216.2	K/uL	14.26	g/dL	16.3	%	46.16	%	1.3	g/dL	NULL	NULL	NULL	NULL	136.83	mEq/L	5.13	mEq/L	9.07	mg/dL	97.67	mEq/L	241.17	mg/dL	NULL	NULL	29.5	mEq/L	7.16	units	38.64	mm Hg
11281568	55	M	WHITE	71.5	175	Medicare	English	SINGLE	MICU	NULL	NULL	NULL	NULL	NULL	NULL	NULL	NULL	NULL	NULL	NULL	NULL	NULL	NULL	NULL	NULL	NULL	NULL	NULL	NULL	NULL	NULL	NULL	NULL	NULL	NULL	NULL	NULL	NULL	NULL	NULL	NULL	NULL	NULL	NULL	NULL	7.4	units	37.33	mm Hg
11283811	76	M	UNKNOWN	68.1	160	Medicare	English	MARRIED	CVICU	15.2	K/uL	3.91	m/uL	7.15	K/uL	2.82	K/uL	130	K/uL	11.3	g/dL	13.3	%	34.5	%	NULL	NULL	NULL	NULL	NULL	NULL	138	mEq/L	4.25	mEq/L	8.1	mg/dL	109.5	mEq/L	118	mg/dL	NULL	NULL	8.5	mEq/L	7.42	units	36.8	mm Hg
11284817	61	F	WHITE	55	170	Medicare	English	MARRIED	Neuro Intermediate	14.5	K/uL	3.83	m/uL	9.77	K/uL	3.32	K/uL	429	K/uL	10.5	g/dL	17	%	33.5	%	2.9	g/dL	2.5	g/dL	5.4	g/dL	144	mEq/L	4.1	mEq/L	NULL	NULL	104	mEq/L	89	mg/dL	6	%	11	mEq/L	NULL	NULL	NULL	NULL
11287462	68	F	WHITE	68	157	Medicare	English	MARRIED	MICU/SICU	31.35	K/uL	2.52	m/uL	20.51	K/uL	2.74	K/uL	270.5	K/uL	7.9	g/dL	25.45	%	27.25	%	3	g/dL	NULL	NULL	NULL	NULL	136.67	mEq/L	4.07	mEq/L	7.9	mg/dL	106	mEq/L	111.33	mg/dL	NULL	NULL	18	mEq/L	7.23	units	47.5	mm Hg
11287998	76	F	WHITE	72.8	NULL	Medicare	English	SINGLE	CCU	9.5	K/uL	4.01	m/uL	NULL	NULL	NULL	NULL	295	K/uL	12.7	g/dL	13.5	%	38.8	%	NULL	NULL	NULL	NULL	NULL	NULL	139	mEq/L	5.1	mEq/L	9.8	mg/dL	95	mEq/L	105	mg/dL	NULL	NULL	14	mEq/L	NULL	NULL	NULL	NULL
11290284	59	F	BLACK/AFRICAN AMERICAN	143.1	NULL	Medicaid	English	SINGLE	SICU	NULL	NULL	NULL	NULL	NULL	NULL	NULL	NULL	NULL	NULL	NULL	NULL	NULL	NULL	NULL	NULL	NULL	NULL	NULL	NULL	NULL	NULL	145	mEq/L	5.3	mEq/L	8.7	mg/dL	102	mEq/L	107	mg/dL	NULL	NULL	17	mEq/L	NULL	NULL	NULL	NULL
11294917	65	M	WHITE	50.7	173	Medicare	English	SINGLE	MICU/SICU	14.08	K/uL	2.59	m/uL	12.94	K/uL	0.48	K/uL	121.25	K/uL	7.98	g/dL	14.85	%	23.83	%	NULL	NULL	NULL	NULL	NULL	NULL	135	mEq/L	3.4	mEq/L	7.83	mg/dL	93.67	mEq/L	94	mg/dL	NULL	NULL	11.67	mEq/L	7.39	units	53.33	mm Hg
11303674	55	F	BLACK/AFRICAN AMERICAN	121	157	Medicare	English	SINGLE	TSICU	12.4	K/uL	3.49	m/uL	7.32	K/uL	0.29	K/uL	141.5	K/uL	10.15	g/dL	16.1	%	32.5	%	NULL	NULL	NULL	NULL	NULL	NULL	136	mEq/L	4.2	mEq/L	8.05	mg/dL	104.5	mEq/L	103.5	mg/dL	NULL	NULL	16.5	mEq/L	7.29	units	46.6	mm Hg
11305167	65	M	WHITE - OTHER EUROPEAN	68.6	NULL	Private	English	WIDOWED	CCU	11.5	K/uL	3.66	m/uL	NULL	NULL	NULL	NULL	325	K/uL	11.7	g/dL	12.4	%	36.5	%	NULL	NULL	NULL	NULL	NULL	NULL	140	mEq/L	3.8	mEq/L	9.2	mg/dL	103	mEq/L	184	mg/dL	NULL	NULL	11	mEq/L	7.26	units	66	mm Hg
11307177	88	F	WHITE	40.8	NULL	Medicare	English	MARRIED	CCU	19.4	K/uL	5.04	m/uL	16.96	K/uL	1.08	K/uL	418	K/uL	14.6	g/dL	14.3	%	48.9	%	NULL	NULL	NULL	NULL	NULL	NULL	137.5	mEq/L	3.75	mEq/L	7.5	mg/dL	97.5	mEq/L	160.5	mg/dL	NULL	NULL	16.5	mEq/L	7.22	units	54	mm Hg
11308999	76	F	BLACK/AFRICAN AMERICAN	128.9	163	Medicare	English	MARRIED	MICU/SICU	6.75	K/uL	2.69	m/uL	4.09	K/uL	4.09	K/uL	129	K/uL	9.6	g/dL	13.4	%	30.7	%	2.6	g/dL	NULL	NULL	NULL	NULL	141.5	mEq/L	4.2	mEq/L	8.05	mg/dL	105	mEq/L	344.5	mg/dL	NULL	NULL	19	mEq/L	6.99	units	72	mm Hg
11336604	86	M	ASIAN	76.15	173	Medicaid	Vietnamese	SINGLE	CCU	10.9	K/uL	3.87	m/uL	NULL	NULL	NULL	NULL	238	K/uL	12.6	g/dL	13.8	%	37.55	%	NULL	NULL	NULL	NULL	NULL	NULL	137	mEq/L	3.8	mEq/L	8.4	mg/dL	101	mEq/L	138.5	mg/dL	6	%	14	mEq/L	7.44	units	37	mm Hg
11339076	67	F	WHITE	74.1	NULL	Medicare	English	MARRIED	MICU	7.9	K/uL	3.25	m/uL	NULL	NULL	NULL	NULL	244	K/uL	9.4	g/dL	13.6	%	30.8	%	3.4	g/dL	NULL	NULL	NULL	NULL	148	mEq/L	3.3	mEq/L	9.5	mg/dL	108	mEq/L	105	mg/dL	NULL	NULL	13	mEq/L	NULL	NULL	NULL	NULL
11353832	82	M	UNKNOWN	105	188	Medicare	English	NULL	MICU	8.6	K/uL	4.09	m/uL	NULL	NULL	NULL	NULL	121	K/uL	9.8	g/dL	20.5	%	32.8	%	NULL	NULL	NULL	NULL	NULL	NULL	142.5	mEq/L	4.7	mEq/L	9.33	mg/dL	98.25	mEq/L	95.5	mg/dL	NULL	NULL	10	mEq/L	7.44	units	56.5	mm Hg
11361863	65	M	WHITE	136.667	178	Private	English	MARRIED	TSICU	9.2	K/uL	2.92	m/uL	6.64	K/uL	1.3	K/uL	204.33	K/uL	9.23	g/dL	16.03	%	30.93	%	NULL	NULL	NULL	NULL	NULL	NULL	142	mEq/L	3.73	mEq/L	8.75	mg/dL	100.33	mEq/L	124.33	mg/dL	NULL	NULL	15	mEq/L	7.36	units	54	mm Hg
11364795	69	M	WHITE	63.4	NULL	Medicare	English	DIVORCED	MICU/SICU	13.3	K/uL	3.22	m/uL	NULL	NULL	NULL	NULL	246	K/uL	8.75	g/dL	14.55	%	28.6	%	1.5	g/dL	NULL	NULL	NULL	NULL	145	mEq/L	3.83	mEq/L	7.25	mg/dL	116	mEq/L	102	mg/dL	5.4	%	10.33	mEq/L	7.27	units	34	mm Hg
11367269	67	F	WHITE	53.5	160	Private	English	WIDOWED	MICU	12.7	K/uL	3.18	m/uL	10.37	K/uL	0.88	K/uL	404.33	K/uL	11.23	g/dL	12.47	%	33.17	%	3.6	g/dL	NULL	NULL	NULL	NULL	130.75	mEq/L	4.08	mEq/L	9.73	mg/dL	90.75	mEq/L	115.5	mg/dL	NULL	NULL	14.75	mEq/L	7.42	units	46.17	mm Hg
11368636	92	F	WHITE - OTHER EUROPEAN	55.6	NULL	Medicare	English	WIDOWED	MICU	NULL	NULL	NULL	NULL	NULL	NULL	NULL	NULL	NULL	NULL	NULL	NULL	NULL	NULL	NULL	NULL	NULL	NULL	NULL	NULL	NULL	NULL	141	mEq/L	4.3	mEq/L	8.5	mg/dL	103	mEq/L	102	mg/dL	NULL	NULL	11	mEq/L	NULL	NULL	NULL	NULL
11371089	81	M	WHITE	103.85	180	Medicare	English	MARRIED	CVICU	10.73	K/uL	3.79	m/uL	8.81	K/uL	1.09	K/uL	93.5	K/uL	11.87	g/dL	12.33	%	36.3	%	NULL	NULL	NULL	NULL	NULL	NULL	139	mEq/L	4.3	mEq/L	NULL	NULL	109.5	mEq/L	133	mg/dL	NULL	NULL	15	mEq/L	7.38	units	40.4	mm Hg
11372975	81	F	WHITE	50.45	152	Medicare	English	SINGLE	SICU	9.73	K/uL	4.31	m/uL	7.35	K/uL	0.71	K/uL	187	K/uL	12.47	g/dL	13.23	%	37.1	%	NULL	NULL	NULL	NULL	NULL	NULL	130.67	mEq/L	4.07	mEq/L	8.17	mg/dL	94	mEq/L	104.67	mg/dL	NULL	NULL	13	mEq/L	7.38	units	47	mm Hg
11381050	92	M	BLACK/AFRICAN AMERICAN	102.7	NULL	Medicare	English	DIVORCED	CVICU	7.5	K/uL	3.67	m/uL	NULL	NULL	NULL	NULL	143	K/uL	10.6	g/dL	14.1	%	35.1	%	NULL	NULL	NULL	NULL	NULL	NULL	140	mEq/L	5.1	mEq/L	10.13	mg/dL	95.33	mEq/L	112.33	mg/dL	NULL	NULL	13	mEq/L	7.3	units	70.2	mm Hg
11382104	70	M	WHITE	67	NULL	Medicare	English	SINGLE	SICU	12.2	K/uL	3.37	m/uL	NULL	NULL	NULL	NULL	124	K/uL	10.6	g/dL	13.4	%	31.4	%	NULL	NULL	NULL	NULL	NULL	NULL	138	mEq/L	4.1	mEq/L	7.9	mg/dL	102	mEq/L	203	mg/dL	NULL	NULL	14	mEq/L	7.49	units	28	mm Hg
11385992	75	M	UNKNOWN	100	NULL	Medicare	English	NULL	MICU	0.85	K/uL	1.93	m/uL	0.26	K/uL	0.31	K/uL	61.75	K/uL	6.23	g/dL	17.33	%	19.23	%	2.9	g/dL	NULL	NULL	NULL	NULL	139	mEq/L	4.25	mEq/L	7.45	mg/dL	102.5	mEq/L	67	mg/dL	NULL	NULL	12.5	mEq/L	7.31	units	56	mm Hg
11388698	78	F	UNKNOWN	NULL	NULL	Medicare	English	NULL	TSICU	11.38	K/uL	3.62	m/uL	10.06	K/uL	0.33	K/uL	191.2	K/uL	11.18	g/dL	12.96	%	33.8	%	NULL	NULL	NULL	NULL	NULL	NULL	130.5	mEq/L	4.75	mEq/L	8.9	mg/dL	92.5	mEq/L	124	mg/dL	NULL	NULL	12	mEq/L	7.37	units	46	mm Hg
11389801	63	F	WHITE	87.1	157	Private	English	MARRIED	CCU	27.7	K/uL	3.77	m/uL	24.25	K/uL	2.62	K/uL	281.5	K/uL	12.6	g/dL	14.1	%	37.85	%	3.25	g/dL	NULL	NULL	NULL	NULL	141.67	mEq/L	3.97	mEq/L	8.75	mg/dL	105	mEq/L	183	mg/dL	5.9	%	13.67	mEq/L	7.36	units	38.75	mm Hg
11390421	70	M	WHITE	62.1	NULL	Medicare	English	SINGLE	MICU	18.05	K/uL	3.03	m/uL	15.64	K/uL	1.27	K/uL	572.5	K/uL	8.5	g/dL	15.05	%	27.4	%	2.8	g/dL	NULL	NULL	NULL	NULL	136	mEq/L	4.6	mEq/L	8.7	mg/dL	98	mEq/L	101	mg/dL	NULL	NULL	13	mEq/L	7.44	units	44	mm Hg
11395978	62	F	WHITE	51	NULL	Medicaid	English	SINGLE	MICU/SICU	8.7	K/uL	3.91	m/uL	NULL	NULL	NULL	NULL	142	K/uL	11.5	g/dL	14.2	%	34.1	%	NULL	NULL	NULL	NULL	NULL	NULL	135	mEq/L	4.2	mEq/L	8.4	mg/dL	93	mEq/L	98	mg/dL	NULL	NULL	18	mEq/L	7.45	units	36	mm Hg
11404288	91	M	NATIVE HAWAIIAN OR OTHER PACIFIC ISLANDER	78.65	NULL	Medicare	English	NULL	TSICU	12.53	K/uL	2.57	m/uL	9.38	K/uL	1.21	K/uL	241.5	K/uL	7.3	g/dL	16.4	%	26.35	%	NULL	NULL	NULL	NULL	NULL	NULL	145.8	mEq/L	7.08	mEq/L	8.86	mg/dL	107.4	mEq/L	83.4	mg/dL	NULL	NULL	12.6	mEq/L	7.25	units	62.5	mm Hg
11409143	70	M	WHITE	58.7	170	Medicare	English	DIVORCED	CCU	14.18	K/uL	2.81	m/uL	NULL	NULL	NULL	NULL	148.2	K/uL	9.26	g/dL	13.22	%	27.36	%	NULL	NULL	NULL	NULL	NULL	NULL	141	mEq/L	4.25	mEq/L	8.7	mg/dL	105.5	mEq/L	125.5	mg/dL	NULL	NULL	10.5	mEq/L	7.34	units	49	mm Hg
11409198	67	M	WHITE	118	NULL	Medicare	English	MARRIED	Neuro Stepdown	7.6	K/uL	3.89	m/uL	NULL	NULL	NULL	NULL	201	K/uL	11.1	g/dL	14.7	%	37.2	%	NULL	NULL	NULL	NULL	NULL	NULL	139.5	mEq/L	3.6	mEq/L	NULL	NULL	101	mEq/L	128	mg/dL	NULL	NULL	14.5	mEq/L	NULL	NULL	NULL	NULL
11409616	66	M	UNKNOWN	66.6	178	Medicaid	English	NULL	CVICU	12.87	K/uL	3.2	m/uL	8.84	K/uL	2.29	K/uL	125	K/uL	9.27	g/dL	14.43	%	29.35	%	NULL	NULL	NULL	NULL	NULL	NULL	140	mEq/L	4.35	mEq/L	8.9	mg/dL	105.5	mEq/L	106	mg/dL	NULL	NULL	8.5	mEq/L	7.33	units	50	mm Hg
11413064	54	M	WHITE	127.6	178	Medicaid	English	SINGLE	CCU	11.8	K/uL	4.93	m/uL	NULL	NULL	NULL	NULL	288	K/uL	14.9	g/dL	14.9	%	46	%	NULL	NULL	NULL	NULL	NULL	NULL	142.5	mEq/L	4.4	mEq/L	10	mg/dL	93.5	mEq/L	132.5	mg/dL	NULL	NULL	15	mEq/L	NULL	NULL	NULL	NULL
11414948	64	F	WHITE	60.2	168	Medicare	English	WIDOWED	TSICU	7.75	K/uL	3.66	m/uL	3.08	K/uL	2.32	K/uL	270.5	K/uL	10.7	g/dL	12.7	%	32.2	%	3	g/dL	NULL	NULL	NULL	NULL	136.33	mEq/L	3.6	mEq/L	7.77	mg/dL	103	mEq/L	136.33	mg/dL	NULL	NULL	12.33	mEq/L	7.34	units	43	mm Hg
11415514	68	M	UNKNOWN	77.6	183	Medicare	English	DIVORCED	MICU/SICU	6.1	K/uL	3.39	m/uL	5.66	K/uL	0.25	K/uL	215	K/uL	12.4	g/dL	17.5	%	36.5	%	3.7	g/dL	NULL	NULL	NULL	NULL	135	mEq/L	4.1	mEq/L	7.9	mg/dL	104	mEq/L	181	mg/dL	NULL	NULL	16	mEq/L	NULL	NULL	NULL	NULL
11417948	70	M	WHITE	122.2	183	Private	English	DIVORCED	CVICU	21.93	K/uL	4.09	m/uL	11.8	K/uL	2.87	K/uL	188.33	K/uL	12.27	g/dL	14.27	%	36.9	%	NULL	NULL	NULL	NULL	NULL	NULL	138	mEq/L	5.4	mEq/L	NULL	NULL	107	mEq/L	126	mg/dL	NULL	NULL	16	mEq/L	7.31	units	47.25	mm Hg
11430317	73	M	PATIENT DECLINED TO ANSWER	69	173	Medicare	English	SINGLE	CVICU	12.13	K/uL	3.46	m/uL	9.27	K/uL	1.27	K/uL	123.33	K/uL	11.63	g/dL	12.23	%	33.98	%	NULL	NULL	NULL	NULL	NULL	NULL	130	mEq/L	4	mEq/L	NULL	NULL	105.5	mEq/L	88	mg/dL	NULL	NULL	6.5	mEq/L	7.42	units	36.5	mm Hg
11437347	92	M	WHITE	86.15	NULL	Medicare	English	MARRIED	MICU/SICU	9.25	K/uL	3.47	m/uL	6.51	K/uL	0.76	K/uL	126	K/uL	11.55	g/dL	14.6	%	34	%	3	g/dL	NULL	NULL	NULL	NULL	130.67	mEq/L	3.77	mEq/L	8	mg/dL	89	mEq/L	135.33	mg/dL	NULL	NULL	14	mEq/L	7.47	units	44	mm Hg
11437634	62	M	WHITE - EASTERN EUROPEAN	49.9	NULL	Medicare	English	DIVORCED	MICU/SICU	9.2	K/uL	3.61	m/uL	NULL	NULL	NULL	NULL	200	K/uL	11.4	g/dL	12.3	%	34.3	%	3.6	g/dL	NULL	NULL	NULL	NULL	134	mEq/L	3.7	mEq/L	7.8	mg/dL	97	mEq/L	170	mg/dL	NULL	NULL	14	mEq/L	NULL	NULL	NULL	NULL
11438060	81	F	WHITE	70.3333	NULL	Medicare	English	DIVORCED	MICU/SICU	7	K/uL	4.04	m/uL	NULL	NULL	NULL	NULL	278.5	K/uL	10.85	g/dL	15.95	%	35.15	%	NULL	NULL	NULL	NULL	NULL	NULL	131	mEq/L	4.6	mEq/L	8.45	mg/dL	101	mEq/L	142.5	mg/dL	NULL	NULL	9.5	mEq/L	NULL	NULL	NULL	NULL
11438607	86	F	WHITE	55	NULL	Medicare	English	WIDOWED	CCU	6.3	K/uL	2.79	m/uL	5.97	K/uL	0.99	K/uL	124	K/uL	8.55	g/dL	13.7	%	26.7	%	3.1	g/dL	NULL	NULL	NULL	NULL	136.5	mEq/L	4.15	mEq/L	8.55	mg/dL	100	mEq/L	101	mg/dL	NULL	NULL	11	mEq/L	7.4	units	50.5	mm Hg
11443579	59	M	UNKNOWN	66.7	NULL	Medicaid	English	NULL	MICU	5.4	K/uL	3.29	m/uL	NULL	NULL	NULL	NULL	93	K/uL	10.5	g/dL	14.55	%	31.2	%	2.7	g/dL	NULL	NULL	NULL	NULL	137.5	mEq/L	4.05	mEq/L	9.3	mg/dL	107.5	mEq/L	94.5	mg/dL	NULL	NULL	12.5	mEq/L	7.42	units	34	mm Hg
11446193	64	F	WHITE	66.1	NULL	Medicare	English	WIDOWED	MICU	5.7	K/uL	3.95	m/uL	5.62	K/uL	0.39	K/uL	174	K/uL	9.65	g/dL	18.25	%	32.45	%	4.3	g/dL	NULL	NULL	NULL	NULL	144	mEq/L	4.25	mEq/L	8.5	mg/dL	103.5	mEq/L	176.5	mg/dL	NULL	NULL	16	mEq/L	7.38	units	44	mm Hg
11447497	74	F	WHITE	78	NULL	Medicare	English	SINGLE	MICU	1.38	K/uL	2.96	m/uL	0.01	K/uL	0.75	K/uL	228.2	K/uL	8.84	g/dL	16.94	%	26.18	%	2.5	g/dL	2	g/dL	4.5	g/dL	140	mEq/L	5.4	mEq/L	8.5	mg/dL	109	mEq/L	121	mg/dL	NULL	NULL	16	mEq/L	NULL	NULL	NULL	NULL
11452424	95	M	ASIAN - CHINESE	55.8	168	Medicare	English	MARRIED	MICU/SICU	8.8	K/uL	2.81	m/uL	NULL	NULL	NULL	NULL	126	K/uL	10	g/dL	13.7	%	31.8	%	NULL	NULL	NULL	NULL	NULL	NULL	145	mEq/L	4.83	mEq/L	7.4	mg/dL	111	mEq/L	81	mg/dL	NULL	NULL	7.5	mEq/L	7.28	units	65.33	mm Hg
11452473	62	F	WHITE	138.6	157	Medicaid	English	SINGLE	MICU/SICU	13.4	K/uL	4.26	m/uL	NULL	NULL	NULL	NULL	381.5	K/uL	11.05	g/dL	21.25	%	34.6	%	NULL	NULL	NULL	NULL	NULL	NULL	136	mEq/L	3.5	mEq/L	9.1	mg/dL	102.5	mEq/L	87.5	mg/dL	NULL	NULL	18.5	mEq/L	NULL	NULL	NULL	NULL
11459417	69	M	UNABLE TO OBTAIN	60.4	NULL	Medicare	English	NULL	MICU/SICU	8.75	K/uL	3.84	m/uL	7.7	K/uL	0.42	K/uL	170	K/uL	12.4	g/dL	12.1	%	38.75	%	3.3	g/dL	NULL	NULL	NULL	NULL	137	mEq/L	4.4	mEq/L	8.95	mg/dL	102	mEq/L	159.5	mg/dL	NULL	NULL	10	mEq/L	7.34	units	53	mm Hg
11460444	54	F	PATIENT DECLINED TO ANSWER	46.8	NULL	Private	English	MARRIED	Neuro Stepdown	20.35	K/uL	3.6	m/uL	NULL	NULL	NULL	NULL	210.5	K/uL	10.9	g/dL	13.1	%	34.8	%	NULL	NULL	NULL	NULL	NULL	NULL	149.33	mEq/L	4.05	mEq/L	8.5	mg/dL	113	mEq/L	153	mg/dL	NULL	NULL	15.5	mEq/L	NULL	NULL	NULL	NULL
11461718	74	M	WHITE	67.8	152	Medicaid	English	MARRIED	SICU	17	K/uL	3.47	m/uL	NULL	NULL	NULL	NULL	268	K/uL	10.5	g/dL	15.35	%	33.3	%	NULL	NULL	NULL	NULL	NULL	NULL	140	mEq/L	5	mEq/L	8.7	mg/dL	107.5	mEq/L	207	mg/dL	NULL	NULL	6.5	mEq/L	7.35	units	52	mm Hg
11462863	57	M	WHITE	50	168	Medicaid	English	SINGLE	CVICU	11.85	K/uL	4.03	m/uL	13.96	K/uL	0.61	K/uL	143.5	K/uL	12.75	g/dL	16.85	%	38.5	%	NULL	NULL	NULL	NULL	NULL	NULL	138.33	mEq/L	3.37	mEq/L	8.03	mg/dL	97	mEq/L	110.33	mg/dL	NULL	NULL	13.67	mEq/L	7.49	units	37.5	mm Hg
11467756	87	M	WHITE	81.4	178	Medicare	English	DIVORCED	MICU/SICU	8.63	K/uL	2.44	m/uL	8.3	K/uL	0.16	K/uL	164.25	K/uL	7.6	g/dL	18.28	%	24.35	%	3.6	g/dL	NULL	NULL	NULL	NULL	143.33	mEq/L	4.7	mEq/L	8.63	mg/dL	109	mEq/L	163.33	mg/dL	NULL	NULL	16	mEq/L	7.35	units	37	mm Hg
11470105	91	M	WHITE - OTHER EUROPEAN	81.9	NULL	Medicare	English	WIDOWED	SICU	10.75	K/uL	3.05	m/uL	NULL	NULL	NULL	NULL	173	K/uL	10.35	g/dL	14.25	%	31.55	%	3.3	g/dL	NULL	NULL	NULL	NULL	142.5	mEq/L	3.55	mEq/L	7.9	mg/dL	107.5	mEq/L	126.5	mg/dL	5.6	%	19.5	mEq/L	7.35	units	37	mm Hg
11475358	70	F	WHITE	65.9	NULL	Medicare	English	MARRIED	SICU	13.7	K/uL	3.44	m/uL	NULL	NULL	NULL	NULL	181	K/uL	11.3	g/dL	12.4	%	33.4	%	NULL	NULL	NULL	NULL	NULL	NULL	133	mEq/L	3.4	mEq/L	9.1	mg/dL	99	mEq/L	157	mg/dL	NULL	NULL	13	mEq/L	NULL	NULL	NULL	NULL
11481453	92	M	WHITE	61.2	173	Medicare	English	MARRIED	MICU/SICU	22.3	K/uL	3.28	m/uL	15.94	K/uL	4.14	K/uL	224	K/uL	10.3	g/dL	15	%	33.8	%	3.5	g/dL	NULL	NULL	NULL	NULL	141	mEq/L	4	mEq/L	8.8	mg/dL	102	mEq/L	212	mg/dL	NULL	NULL	10	mEq/L	7.41	units	58	mm Hg
11497560	65	M	BLACK/AFRICAN AMERICAN	106.8	180	Other	English	SINGLE	MICU	8.4	K/uL	3.73	m/uL	NULL	NULL	NULL	NULL	174	K/uL	11.3	g/dL	15.7	%	35.7	%	3.1	g/dL	NULL	NULL	NULL	NULL	141.5	mEq/L	3.75	mEq/L	8.85	mg/dL	108.5	mEq/L	100	mg/dL	NULL	NULL	9	mEq/L	7.42	units	39	mm Hg
11503474	78	M	WHITE	102	168	Medicare	English	MARRIED	SICU	17.43	K/uL	3.65	m/uL	NULL	NULL	NULL	NULL	524.67	K/uL	9.5	g/dL	15.53	%	29.77	%	NULL	NULL	NULL	NULL	NULL	NULL	127	mEq/L	4.23	mEq/L	7.6	mg/dL	91.33	mEq/L	146.33	mg/dL	NULL	NULL	18.67	mEq/L	7.32	units	46	mm Hg
11505655	65	M	WHITE	118.4	NULL	Medicaid	English	SINGLE	MICU/SICU	3.1	K/uL	2.77	m/uL	3.05	K/uL	0.26	K/uL	31.4	K/uL	7.98	g/dL	16.66	%	24.74	%	2.8	g/dL	NULL	NULL	NULL	NULL	137	mEq/L	3.83	mEq/L	7.83	mg/dL	105.33	mEq/L	135.33	mg/dL	NULL	NULL	8.33	mEq/L	NULL	NULL	NULL	NULL
11512225	71	M	WHITE	65.75	170	Medicare	English	MARRIED	MICU	7.46	K/uL	2.64	m/uL	5.87	K/uL	0.86	K/uL	136.2	K/uL	7.84	g/dL	15.42	%	26.02	%	NULL	NULL	NULL	NULL	NULL	NULL	139	mEq/L	3.9	mEq/L	7.8	mg/dL	111	mEq/L	78	mg/dL	NULL	NULL	17.5	mEq/L	7.2	units	37.67	mm Hg
11514591	72	F	WHITE	58.85	155	Medicare	English	SINGLE	TSICU	9.45	K/uL	3.6	m/uL	NULL	NULL	NULL	NULL	314	K/uL	9.38	g/dL	19.35	%	29.75	%	NULL	NULL	NULL	NULL	NULL	NULL	143	mEq/L	4.05	mEq/L	8.15	mg/dL	110.5	mEq/L	93	mg/dL	NULL	NULL	10.5	mEq/L	7.36	units	39	mm Hg
11531307	78	M	WHITE	71	NULL	Medicare	English	SINGLE	CCU	12.3	K/uL	4.03	m/uL	NULL	NULL	NULL	NULL	156	K/uL	12.7	g/dL	14.5	%	40.2	%	NULL	NULL	NULL	NULL	NULL	NULL	141	mEq/L	4.83	mEq/L	9.13	mg/dL	98	mEq/L	115.67	mg/dL	NULL	NULL	24.67	mEq/L	7.32	units	48.5	mm Hg
11543872	67	F	WHITE	81.6	NULL	Private	English	MARRIED	Neuro Intermediate	6.1	K/uL	3.28	m/uL	NULL	NULL	NULL	NULL	158	K/uL	10.3	g/dL	12.4	%	31.5	%	NULL	NULL	NULL	NULL	NULL	NULL	144	mEq/L	3.55	mEq/L	7.1	mg/dL	119	mEq/L	70	mg/dL	NULL	NULL	10	mEq/L	NULL	NULL	NULL	NULL
11547745	91	M	WHITE	71.5	NULL	Medicare	Persian	MARRIED	CCU	5.7	K/uL	2.41	m/uL	3.51	K/uL	1.37	K/uL	238	K/uL	7.9	g/dL	14.2	%	25.5	%	NULL	NULL	NULL	NULL	NULL	NULL	142	mEq/L	3.3	mEq/L	8.1	mg/dL	108	mEq/L	88	mg/dL	NULL	NULL	11	mEq/L	7.35	units	53	mm Hg
11547975	77	M	UNKNOWN	72	NULL	Medicare	English	NULL	TSICU	8.45	K/uL	2.65	m/uL	NULL	NULL	NULL	NULL	98	K/uL	9.25	g/dL	14	%	27.75	%	NULL	NULL	NULL	NULL	NULL	NULL	137	mEq/L	3.95	mEq/L	8.15	mg/dL	105	mEq/L	182	mg/dL	NULL	NULL	12	mEq/L	7.39	units	34	mm Hg
11551791	70	M	UNKNOWN	106.9	185	Private	English	MARRIED	CVICU	16.73	K/uL	3.4	m/uL	11.94	K/uL	3.09	K/uL	97.33	K/uL	11.7	g/dL	12.7	%	35.28	%	NULL	NULL	NULL	NULL	NULL	NULL	137	mEq/L	4.6	mEq/L	7.9	mg/dL	108.5	mEq/L	145	mg/dL	NULL	NULL	10	mEq/L	7.31	units	47.13	mm Hg
11553407	51	F	OTHER	85.7	NULL	Medicare	English	SINGLE	TSICU	17.5	K/uL	4.55	m/uL	NULL	NULL	NULL	NULL	309	K/uL	11.8	g/dL	18.1	%	39.55	%	NULL	NULL	NULL	NULL	NULL	NULL	138.33	mEq/L	5.17	mEq/L	8.8	mg/dL	101.33	mEq/L	139	mg/dL	NULL	NULL	17.67	mEq/L	7.34	units	45	mm Hg
11554268	91	M	WHITE	57.7	168	Medicare	English	DIVORCED	MICU/SICU	8.1	K/uL	3.43	m/uL	7.37	K/uL	0.16	K/uL	204	K/uL	10.4	g/dL	13.8	%	32.9	%	NULL	NULL	NULL	NULL	NULL	NULL	138	mEq/L	3.8	mEq/L	8.8	mg/dL	97.5	mEq/L	176	mg/dL	NULL	NULL	17	mEq/L	7.39	units	62.5	mm Hg
11558942	83	M	BLACK/AFRICAN AMERICAN	121.3	NULL	Medicare	English	WIDOWED	CCU	35.5	K/uL	3.75	m/uL	32.26	K/uL	1.9	K/uL	289	K/uL	10.7	g/dL	14.85	%	31.65	%	3.2	g/dL	NULL	NULL	NULL	NULL	142.67	mEq/L	4.2	mEq/L	8.77	mg/dL	99.67	mEq/L	119.33	mg/dL	NULL	NULL	14	mEq/L	7.4	units	49.25	mm Hg
11562863	57	F	OTHER	58.1	NULL	Medicare	English	MARRIED	Neuro Intermediate	28.8	K/uL	3.55	m/uL	NULL	NULL	NULL	NULL	289	K/uL	11.1	g/dL	13.4	%	33.4	%	NULL	NULL	NULL	NULL	NULL	NULL	146	mEq/L	3.6	mEq/L	8.5	mg/dL	106	mEq/L	118	mg/dL	NULL	NULL	16	mEq/L	NULL	NULL	NULL	NULL
11564045	72	F	WHITE	57.85	168	Medicare	English	SINGLE	CVICU	14.47	K/uL	3.37	m/uL	9.84	K/uL	1.12	K/uL	133	K/uL	10.23	g/dL	17.6	%	32.15	%	NULL	NULL	NULL	NULL	NULL	NULL	140.67	mEq/L	4.37	mEq/L	8.3	mg/dL	107.33	mEq/L	97	mg/dL	NULL	NULL	14	mEq/L	7.4	units	46.86	mm Hg
11564670	79	F	BLACK/AFRICAN AMERICAN	43	165	Medicare	English	SINGLE	Neuro SICU	13.5	K/uL	3.11	m/uL	NULL	NULL	NULL	NULL	386	K/uL	9.9	g/dL	14.9	%	31.7	%	NULL	NULL	NULL	NULL	NULL	NULL	138	mEq/L	4.7	mEq/L	8.8	mg/dL	95	mEq/L	104	mg/dL	NULL	NULL	23	mEq/L	NULL	NULL	NULL	NULL
11564764	65	M	WHITE - OTHER EUROPEAN	59.1	168	Private	English	MARRIED	CVICU	17.63	K/uL	3.21	m/uL	11.84	K/uL	2.56	K/uL	184	K/uL	8.73	g/dL	18.27	%	26.8	%	NULL	NULL	NULL	NULL	NULL	NULL	137.5	mEq/L	4.37	mEq/L	NULL	NULL	105.67	mEq/L	107.5	mg/dL	NULL	NULL	8.67	mEq/L	7.37	units	44.5	mm Hg
11567778	54	M	WHITE	91.2	180	Medicaid	English	DIVORCED	MICU/SICU	0.1	K/uL	2.7	m/uL	NULL	K/uL	NULL	K/uL	31.33	K/uL	7.63	g/dL	16.57	%	22.97	%	NULL	NULL	NULL	NULL	NULL	NULL	137.5	mEq/L	3.7	mEq/L	7.6	mg/dL	107.5	mEq/L	141.5	mg/dL	NULL	NULL	17.5	mEq/L	7.45	units	29	mm Hg
11568974	70	M	BLACK/AFRICAN AMERICAN	63.8	173	Medicare	English	SINGLE	MICU/SICU	6.6	K/uL	5.62	m/uL	NULL	NULL	NULL	NULL	293	K/uL	14.8	g/dL	17.7	%	42.8	%	NULL	NULL	NULL	NULL	NULL	NULL	127	mEq/L	4.45	mEq/L	9.45	mg/dL	93.5	mEq/L	100.5	mg/dL	NULL	NULL	16.5	mEq/L	NULL	NULL	NULL	NULL
11572100	86	F	WHITE	48	155	Medicare	English	SINGLE	MICU	20.25	K/uL	3.92	m/uL	NULL	NULL	NULL	NULL	87	K/uL	11.45	g/dL	15.35	%	36.05	%	2.8	g/dL	NULL	NULL	NULL	NULL	139.5	mEq/L	4.15	mEq/L	8.4	mg/dL	108	mEq/L	93.5	mg/dL	NULL	NULL	11	mEq/L	7.29	units	46.67	mm Hg
11573707	70	F	WHITE	63.2	NULL	Medicare	English	NULL	SICU	32	K/uL	3.56	m/uL	NULL	NULL	NULL	NULL	547.5	K/uL	8.9	g/dL	14.8	%	27.75	%	2.9	g/dL	NULL	NULL	NULL	NULL	136.5	mEq/L	3.45	mEq/L	7.8	mg/dL	104.5	mEq/L	105.5	mg/dL	NULL	NULL	11.5	mEq/L	7.4	units	33.5	mm Hg
11581121	68	F	WHITE	55.4	152	Medicaid	English	WIDOWED	MICU/SICU	15.4	K/uL	3.6	m/uL	14.7	K/uL	1.44	K/uL	157	K/uL	11.35	g/dL	12.9	%	34.7	%	3.1	g/dL	NULL	NULL	NULL	NULL	142	mEq/L	3.95	mEq/L	7.5	mg/dL	110	mEq/L	104	mg/dL	NULL	NULL	14.5	mEq/L	7.32	units	42.5	mm Hg
11581195	63	M	UNKNOWN	84.6	175	Private	English	NULL	CVICU	19.9	K/uL	4.06	m/uL	NULL	NULL	NULL	NULL	486.5	K/uL	12.75	g/dL	12.35	%	38	%	NULL	NULL	NULL	NULL	NULL	NULL	135	mEq/L	4.13	mEq/L	7.43	mg/dL	93	mEq/L	160.67	mg/dL	5.7	%	13.25	mEq/L	7.44	units	45.6	mm Hg
11582697	82	F	WHITE	42.8	NULL	Medicare	English	NULL	MICU	9.8	K/uL	3.05	m/uL	8.76	K/uL	0.69	K/uL	106	K/uL	9.2	g/dL	16.2	%	30.3	%	3.6	g/dL	NULL	NULL	NULL	NULL	141	mEq/L	4.8	mEq/L	8.5	mg/dL	104	mEq/L	135	mg/dL	NULL	NULL	8	mEq/L	7.25	units	70.25	mm Hg
11583002	61	F	WHITE	68.2	163	Private	English	MARRIED	Neuro Intermediate	10	K/uL	3.39	m/uL	NULL	NULL	NULL	NULL	279	K/uL	11.5	g/dL	13.2	%	35.4	%	NULL	NULL	NULL	NULL	NULL	NULL	139	mEq/L	3.9	mEq/L	7.8	mg/dL	99	mEq/L	94	mg/dL	NULL	NULL	15	mEq/L	NULL	NULL	NULL	NULL
11587314	77	F	BLACK/CARIBBEAN ISLAND	64	160	Medicaid	Haitian	WIDOWED	CCU	4.58	K/uL	2.24	m/uL	3.72	K/uL	1.06	K/uL	211	K/uL	8.05	g/dL	17.88	%	28.23	%	4.1	g/dL	NULL	NULL	NULL	NULL	143.5	mEq/L	5.1	mEq/L	9.13	mg/dL	92	mEq/L	87	mg/dL	NULL	NULL	9	mEq/L	7.32	units	102.5	mm Hg
11589090	84	F	UNKNOWN	50.2	165	Private	English	NULL	CCU	13.4	K/uL	2.94	m/uL	13.1	K/uL	0.58	K/uL	114	K/uL	8.55	g/dL	17.15	%	25.6	%	1.9	g/dL	NULL	NULL	NULL	NULL	142.33	mEq/L	5.17	mEq/L	6.75	mg/dL	107	mEq/L	149.5	mg/dL	NULL	NULL	15	mEq/L	7.43	units	34.25	mm Hg
11593390	71	M	WHITE	86.6	NULL	Medicare	English	MARRIED	Neuro Intermediate	11.3	K/uL	4.39	m/uL	8.59	K/uL	0.64	K/uL	173	K/uL	14.77	g/dL	13.37	%	42.67	%	NULL	NULL	NULL	NULL	NULL	NULL	132	mEq/L	3.93	mEq/L	8.6	mg/dL	96.33	mEq/L	132.67	mg/dL	5.4	%	11	mEq/L	7.31	units	55.33	mm Hg
11595694	59	M	WHITE	86	173	Medicaid	English	SINGLE	MICU	14	K/uL	4.48	m/uL	11.01	K/uL	1.26	K/uL	386	K/uL	13.5	g/dL	14.3	%	40.5	%	3	g/dL	NULL	NULL	NULL	NULL	132	mEq/L	4.45	mEq/L	10.5	mg/dL	97.5	mEq/L	120	mg/dL	NULL	NULL	9.5	mEq/L	7.38	units	51	mm Hg
11595895	72	F	WHITE	70.2	160	Medicare	English	SINGLE	Neuro SICU	13.3	K/uL	2.93	m/uL	NULL	NULL	NULL	NULL	494	K/uL	8.27	g/dL	13.77	%	26.93	%	NULL	NULL	NULL	NULL	NULL	NULL	133.67	mEq/L	5.03	mEq/L	8.47	mg/dL	101	mEq/L	150.67	mg/dL	NULL	NULL	11	mEq/L	NULL	NULL	NULL	NULL
11596313	68	M	WHITE	125	177	Medicare	English	SINGLE	TSICU	12.33	K/uL	3.9	m/uL	NULL	NULL	NULL	NULL	178.67	K/uL	13.37	g/dL	12.8	%	41.27	%	NULL	NULL	NULL	NULL	NULL	NULL	135.33	mEq/L	5.4	mEq/L	7.87	mg/dL	103.33	mEq/L	133	mg/dL	NULL	NULL	12.67	mEq/L	7.26	units	41.33	mm Hg
11597207	87	F	WHITE	49	NULL	Medicare	English	MARRIED	SICU	11.5	K/uL	3.92	m/uL	NULL	NULL	NULL	NULL	136	K/uL	11.55	g/dL	14.45	%	35.95	%	NULL	NULL	NULL	NULL	NULL	NULL	136	mEq/L	4.1	mEq/L	8.4	mg/dL	102	mEq/L	110.5	mg/dL	NULL	NULL	15.5	mEq/L	NULL	NULL	NULL	NULL
11601553	89	F	HISPANIC/LATINO - PUERTO RICAN	50	155	Medicare	Spanish	WIDOWED	Neuro Stepdown	8.75	K/uL	3.01	m/uL	NULL	NULL	NULL	NULL	144.5	K/uL	9.25	g/dL	16.1	%	29.5	%	NULL	NULL	NULL	NULL	NULL	NULL	135	mEq/L	4.2	mEq/L	8.55	mg/dL	99	mEq/L	123	mg/dL	NULL	NULL	16.5	mEq/L	NULL	NULL	NULL	NULL
11604088	73	M	WHITE	77.8	178	Medicare	English	MARRIED	TSICU	12.43	K/uL	4.22	m/uL	NULL	NULL	NULL	NULL	168	K/uL	11.1	g/dL	15.7	%	34.98	%	NULL	NULL	NULL	NULL	NULL	NULL	136	mEq/L	4.73	mEq/L	8.4	mg/dL	100.33	mEq/L	113.33	mg/dL	NULL	NULL	14.33	mEq/L	7.33	units	41.25	mm Hg
11616151	54	F	WHITE	28.8	171	Private	English	NULL	MICU	4.7	K/uL	4.26	m/uL	NULL	NULL	NULL	NULL	306	K/uL	12.6	g/dL	13.4	%	38.6	%	3.5	g/dL	NULL	NULL	NULL	NULL	139	mEq/L	4.5	mEq/L	8.55	mg/dL	107	mEq/L	159.5	mg/dL	NULL	NULL	15	mEq/L	7.34	units	39.4	mm Hg
11621020	59	F	WHITE	73	NULL	Medicaid	English	MARRIED	Neuro Intermediate	12.4	K/uL	3.78	m/uL	NULL	NULL	NULL	NULL	218	K/uL	11.6	g/dL	15	%	35.5	%	NULL	NULL	NULL	NULL	NULL	NULL	138	mEq/L	4.3	mEq/L	8.6	mg/dL	105	mEq/L	143	mg/dL	NULL	NULL	11	mEq/L	NULL	NULL	NULL	NULL
11625369	57	F	WHITE	68	160	Medicaid	English	SINGLE	Neuro Stepdown	14.7	K/uL	3.56	m/uL	NULL	NULL	NULL	NULL	255	K/uL	10	g/dL	15	%	32.3	%	NULL	NULL	NULL	NULL	NULL	NULL	142	mEq/L	3.8	mEq/L	NULL	NULL	105	mEq/L	101	mg/dL	NULL	NULL	16	mEq/L	NULL	NULL	NULL	NULL
11629252	95	M	WHITE	83.9	165	Medicare	Modern Greek (1453-)	MARRIED	MICU	11	K/uL	4.12	m/uL	NULL	NULL	NULL	NULL	206.5	K/uL	11.8	g/dL	14.25	%	36.25	%	NULL	NULL	NULL	NULL	NULL	NULL	126.33	mEq/L	5.1	mEq/L	8.3	mg/dL	85.67	mEq/L	120.33	mg/dL	NULL	NULL	20.33	mEq/L	7.31	units	62.33	mm Hg
11629585	58	M	WHITE	90.9667	183	Medicare	English	DIVORCED	MICU/SICU	11.95	K/uL	4.09	m/uL	7.4	K/uL	3.29	K/uL	116	K/uL	13.5	g/dL	15.6	%	39.25	%	3.15	g/dL	NULL	NULL	NULL	NULL	132	mEq/L	3.95	mEq/L	8.1	mg/dL	91.5	mEq/L	132	mg/dL	NULL	NULL	17	mEq/L	NULL	NULL	NULL	NULL
11630846	72	F	WHITE	58.4	157	Medicare	English	DIVORCED	MICU/SICU	14.47	K/uL	2.43	m/uL	NULL	NULL	NULL	NULL	92.67	K/uL	7.1	g/dL	17.37	%	23.87	%	NULL	NULL	NULL	NULL	NULL	NULL	141	mEq/L	5.47	mEq/L	7.03	mg/dL	105.33	mEq/L	131.67	mg/dL	NULL	NULL	15.33	mEq/L	7.2	units	58.25	mm Hg
11632765	65	F	WHITE	52.9	NULL	Medicare	English	MARRIED	MICU	27.46	K/uL	2.51	m/uL	NULL	NULL	NULL	NULL	338.8	K/uL	7.88	g/dL	18.7	%	23.72	%	NULL	NULL	NULL	NULL	5.1	g/dL	137.25	mEq/L	3.55	mEq/L	7.5	mg/dL	98.75	mEq/L	114.25	mg/dL	5.2	%	20.5	mEq/L	7.36	units	37	mm Hg
11633815	76	F	WHITE	49.6	168	Medicare	English	NULL	MICU	5.84	K/uL	2.56	m/uL	8.12	K/uL	0.26	K/uL	155.2	K/uL	8.58	g/dL	16.04	%	25.02	%	3.45	g/dL	NULL	NULL	NULL	NULL	149	mEq/L	3.9	mEq/L	9.07	mg/dL	108	mEq/L	141	mg/dL	NULL	NULL	19.33	mEq/L	NULL	NULL	NULL	NULL
11634256	64	M	WHITE	119.8	175	Medicare	English	SINGLE	MICU/SICU	12.4	K/uL	4.56	m/uL	NULL	NULL	NULL	NULL	243	K/uL	14.3	g/dL	15.6	%	45.3	%	NULL	NULL	NULL	NULL	NULL	NULL	137	mEq/L	5	mEq/L	9.05	mg/dL	100	mEq/L	154.5	mg/dL	NULL	NULL	9	mEq/L	7.34	units	56.5	mm Hg
11635995	86	F	UNKNOWN	77	NULL	Medicare	English	NULL	SICU	11.85	K/uL	2.98	m/uL	11.42	K/uL	0.41	K/uL	379.5	K/uL	8.15	g/dL	15.9	%	25.35	%	3.4	g/dL	NULL	NULL	NULL	NULL	135	mEq/L	5.25	mEq/L	9.05	mg/dL	92.25	mEq/L	155.75	mg/dL	NULL	NULL	15.75	mEq/L	7.52	units	35.8	mm Hg
11636721	67	M	WHITE	83	168	Medicare	English	MARRIED	MICU	11.5	K/uL	4.74	m/uL	7.34	K/uL	2.16	K/uL	223	K/uL	13.5	g/dL	14.5	%	41.8	%	NULL	NULL	NULL	NULL	NULL	NULL	137	mEq/L	4.8	mEq/L	7.8	mg/dL	102	mEq/L	98	mg/dL	NULL	NULL	15	mEq/L	NULL	NULL	NULL	NULL
11640387	67	F	UNABLE TO OBTAIN	95.2	NULL	Medicare	English	NULL	MICU/SICU	14.2	K/uL	4.05	m/uL	11.73	K/uL	1.76	K/uL	238	K/uL	10.5	g/dL	16.7	%	33.9	%	3.4	g/dL	NULL	NULL	NULL	NULL	140	mEq/L	4.6	mEq/L	9.7	mg/dL	108	mEq/L	171	mg/dL	NULL	NULL	9	mEq/L	NULL	NULL	NULL	NULL
11649225	46	F	WHITE	103.5	NULL	Medicaid	English	DIVORCED	MICU/SICU	12.15	K/uL	4.9	m/uL	10.99	K/uL	0.52	K/uL	255.5	K/uL	12.2	g/dL	14.6	%	39.25	%	NULL	NULL	NULL	NULL	NULL	NULL	139.5	mEq/L	4.45	mEq/L	9.15	mg/dL	105	mEq/L	161.5	mg/dL	NULL	NULL	11.5	mEq/L	NULL	NULL	NULL	NULL
11650026	91	F	PORTUGUESE	55.8	NULL	Medicaid	Portuguese	WIDOWED	MICU	13.6	K/uL	3.01	m/uL	10.54	K/uL	0.51	K/uL	133.5	K/uL	9.55	g/dL	15.65	%	30.45	%	NULL	NULL	NULL	NULL	NULL	NULL	143.5	mEq/L	3.95	mEq/L	8.1	mg/dL	104.5	mEq/L	132.5	mg/dL	NULL	NULL	11.5	mEq/L	7.32	units	55.67	mm Hg
11651571	77	F	WHITE	64.15	NULL	Medicare	English	WIDOWED	MICU/SICU	13.7	K/uL	2.69	m/uL	NULL	NULL	NULL	NULL	186.33	K/uL	8.27	g/dL	17.37	%	27.4	%	NULL	NULL	NULL	NULL	NULL	NULL	144	mEq/L	5.24	mEq/L	8.64	mg/dL	104.75	mEq/L	73.75	mg/dL	NULL	NULL	13.75	mEq/L	7.24	units	58	mm Hg
11655439	76	M	WHITE	93.7	173	Medicare	English	MARRIED	CVICU	21.53	K/uL	3.78	m/uL	17.69	K/uL	3.13	K/uL	175	K/uL	11.53	g/dL	12.8	%	35.85	%	NULL	NULL	NULL	NULL	NULL	NULL	139	mEq/L	4.45	mEq/L	8	mg/dL	103.5	mEq/L	95	mg/dL	NULL	NULL	9.5	mEq/L	7.35	units	50.8	mm Hg
11655763	88	F	WHITE	47	NULL	Medicare	English	MARRIED	TSICU	11	K/uL	3.36	m/uL	NULL	NULL	NULL	NULL	135	K/uL	10.1	g/dL	14.4	%	31.3	%	NULL	NULL	NULL	NULL	NULL	NULL	136	mEq/L	4	mEq/L	8.5	mg/dL	101	mEq/L	120	mg/dL	NULL	NULL	10	mEq/L	7.41	units	40.5	mm Hg
11658675	71	M	WHITE	82	NULL	Medicare	English	WIDOWED	MICU/SICU	4.9	K/uL	3.15	m/uL	NULL	NULL	NULL	NULL	91	K/uL	9.9	g/dL	15.3	%	31	%	2.9	g/dL	NULL	NULL	NULL	NULL	140	mEq/L	3.9	mEq/L	8.4	mg/dL	102	mEq/L	87	mg/dL	NULL	NULL	11	mEq/L	NULL	NULL	NULL	NULL
11659290	78	F	WHITE	72.5	168	Medicare	English	WIDOWED	CVICU	23.77	K/uL	2.71	m/uL	NULL	NULL	NULL	NULL	441	K/uL	7.5	g/dL	16.67	%	22.5	%	NULL	NULL	NULL	NULL	NULL	NULL	140.5	mEq/L	3.9	mEq/L	8.8	mg/dL	106.5	mEq/L	90	mg/dL	NULL	NULL	15	mEq/L	7.45	units	NULL	NULL
11660173	72	M	UNABLE TO OBTAIN	130.8	193	Medicare	English	NULL	MICU	7.15	K/uL	2.93	m/uL	NULL	NULL	NULL	NULL	217	K/uL	8.9	g/dL	18.5	%	29.15	%	NULL	NULL	NULL	NULL	NULL	NULL	142.33	mEq/L	3.87	mEq/L	8.17	mg/dL	99.33	mEq/L	130.67	mg/dL	NULL	NULL	11.67	mEq/L	7.31	units	72	mm Hg
11662523	91	F	WHITE	65	NULL	Medicare	English	WIDOWED	Neuro SICU	26.1	K/uL	4.2	m/uL	NULL	NULL	NULL	NULL	440	K/uL	10.2	g/dL	15.4	%	32.9	%	NULL	NULL	NULL	NULL	NULL	NULL	142	mEq/L	4	mEq/L	8	mg/dL	101	mEq/L	114	mg/dL	NULL	NULL	14	mEq/L	7.44	units	46	mm Hg
11665626	64	M	BLACK/AFRICAN AMERICAN	71.6	NULL	Other	English	SINGLE	MICU	5.7	K/uL	2.72	m/uL	4.58	K/uL	0.76	K/uL	171	K/uL	7.87	g/dL	19.67	%	25.9	%	3	g/dL	NULL	NULL	NULL	NULL	137	mEq/L	4.1	mEq/L	9.37	mg/dL	99	mEq/L	95.67	mg/dL	NULL	NULL	14.67	mEq/L	7.45	units	41.2	mm Hg
11671127	60	F	WHITE	104.6	168	Private	English	MARRIED	CCU	7.37	K/uL	4	m/uL	5.33	K/uL	1.4	K/uL	197.33	K/uL	11.33	g/dL	16.13	%	37.87	%	NULL	NULL	NULL	NULL	NULL	NULL	139.25	mEq/L	4.55	mEq/L	8.48	mg/dL	101.8	mEq/L	113.25	mg/dL	NULL	NULL	13.2	mEq/L	7.31	units	58.8	mm Hg
11671350	73	M	UNKNOWN	80	NULL	Medicare	English	MARRIED	MICU/SICU	10.35	K/uL	3.22	m/uL	9.69	K/uL	0.26	K/uL	115	K/uL	10.8	g/dL	14.2	%	31.95	%	3	g/dL	NULL	NULL	NULL	NULL	136.67	mEq/L	4.33	mEq/L	7.57	mg/dL	102	mEq/L	152.67	mg/dL	NULL	NULL	15.33	mEq/L	7.41	units	41.75	mm Hg
11673166	62	F	HISPANIC/LATINO - PUERTO RICAN	68.5	NULL	Medicaid	English	SINGLE	MICU/SICU	7.6	K/uL	4.67	m/uL	NULL	NULL	NULL	NULL	287	K/uL	15	g/dL	14.3	%	44.5	%	NULL	NULL	NULL	NULL	NULL	NULL	135	mEq/L	3.5	mEq/L	8.9	mg/dL	101	mEq/L	125	mg/dL	NULL	NULL	7	mEq/L	NULL	NULL	NULL	NULL
11676232	87	F	WHITE	60.9	NULL	Medicare	English	WIDOWED	TSICU	8.8	K/uL	3.92	m/uL	6.93	K/uL	2.01	K/uL	213	K/uL	12.05	g/dL	14.4	%	38.4	%	NULL	NULL	NULL	NULL	NULL	NULL	140.5	mEq/L	3.95	mEq/L	8.75	mg/dL	109.5	mEq/L	99	mg/dL	NULL	NULL	14	mEq/L	7.29	units	46	mm Hg
11693022	64	F	WHITE	75.8	NULL	Private	English	SINGLE	MICU/SICU	NULL	NULL	NULL	NULL	NULL	NULL	NULL	NULL	NULL	NULL	NULL	NULL	NULL	NULL	NULL	NULL	NULL	NULL	NULL	NULL	NULL	NULL	121	mEq/L	4	mEq/L	8.9	mg/dL	82	mEq/L	90	mg/dL	NULL	NULL	23	mEq/L	NULL	NULL	NULL	NULL
11703161	71	M	BLACK/AFRICAN AMERICAN	80	178	Medicaid	English	MARRIED	CCU	4.4	K/uL	2.58	m/uL	3.19	K/uL	0.95	K/uL	203	K/uL	7.5	g/dL	16.2	%	25.8	%	NULL	NULL	NULL	NULL	NULL	NULL	142	mEq/L	3.9	mEq/L	7.7	mg/dL	103	mEq/L	195	mg/dL	NULL	NULL	12	mEq/L	7.45	units	40	mm Hg
11710564	71	F	WHITE	72.3	165	Medicare	English	WIDOWED	CVICU	18.43	K/uL	3.32	m/uL	11.49	K/uL	1.71	K/uL	158.25	K/uL	10.03	g/dL	13.15	%	31.14	%	NULL	NULL	NULL	NULL	NULL	NULL	141.5	mEq/L	4.23	mEq/L	8.25	mg/dL	103.67	mEq/L	124.5	mg/dL	NULL	NULL	12.33	mEq/L	7.37	units	39.43	mm Hg
11712299	72	M	AMERICAN INDIAN/ALASKA NATIVE	86	170	Medicare	English	MARRIED	MICU	8.03	K/uL	2.65	m/uL	NULL	NULL	NULL	NULL	100.67	K/uL	7.4	g/dL	17.5	%	25.47	%	2.3	g/dL	NULL	NULL	NULL	NULL	132	mEq/L	4.4	mEq/L	8.17	mg/dL	97.33	mEq/L	110.33	mg/dL	NULL	NULL	10	mEq/L	7.32	units	56	mm Hg
11718182	92	F	UNKNOWN	67	NULL	Medicare	English	MARRIED	Neuro Intermediate	11.95	K/uL	3.46	m/uL	NULL	NULL	NULL	NULL	226.5	K/uL	12.1	g/dL	12.2	%	37.25	%	NULL	NULL	NULL	NULL	NULL	NULL	136.5	mEq/L	4.1	mEq/L	9.65	mg/dL	97	mEq/L	148	mg/dL	5.9	%	14.5	mEq/L	NULL	NULL	NULL	NULL
11721141	74	F	WHITE	79	NULL	Medicare	English	MARRIED	CVICU	NULL	NULL	NULL	NULL	NULL	NULL	NULL	NULL	NULL	NULL	NULL	NULL	NULL	NULL	NULL	NULL	NULL	NULL	NULL	NULL	NULL	NULL	144	mEq/L	4.2	mEq/L	7.9	mg/dL	115	mEq/L	113	mg/dL	NULL	NULL	14	mEq/L	7.22	units	38	mm Hg
11722704	86	F	WHITE	49.1	NULL	Medicare	English	WIDOWED	MICU/SICU	10.25	K/uL	3.49	m/uL	7.38	K/uL	1.62	K/uL	384.5	K/uL	11	g/dL	12.9	%	32.05	%	3.4	g/dL	NULL	NULL	NULL	NULL	141	mEq/L	3.1	mEq/L	8.45	mg/dL	106	mEq/L	104.5	mg/dL	NULL	NULL	15	mEq/L	7.38	units	38.5	mm Hg
11725345	74	M	UNKNOWN	68	175	Medicare	English	NULL	MICU	13.7	K/uL	2.98	m/uL	NULL	NULL	NULL	NULL	309	K/uL	9.9	g/dL	16.1	%	30.65	%	NULL	NULL	NULL	NULL	NULL	NULL	138	mEq/L	3.7	mEq/L	8.5	mg/dL	106	mEq/L	70	mg/dL	NULL	NULL	17	mEq/L	7.29	units	45	mm Hg
11725800	70	F	WHITE - OTHER EUROPEAN	65	157	Private	English	MARRIED	SICU	13.5	K/uL	3.27	m/uL	NULL	NULL	NULL	NULL	193	K/uL	9.5	g/dL	14.3	%	31	%	3.3	g/dL	1.2	g/dL	4.5	g/dL	137	mEq/L	4	mEq/L	7.9	mg/dL	106	mEq/L	90	mg/dL	NULL	NULL	14	mEq/L	7.31	units	37	mm Hg
11727183	75	M	WHITE	78	178	Medicare	English	MARRIED	Neuro Stepdown	15.9	K/uL	4.07	m/uL	NULL	NULL	NULL	NULL	206	K/uL	13.9	g/dL	13.8	%	40.4	%	NULL	NULL	NULL	NULL	NULL	NULL	142	mEq/L	3.6	mEq/L	NULL	NULL	103	mEq/L	141	mg/dL	NULL	NULL	19	mEq/L	NULL	NULL	NULL	NULL
11727202	92	F	WHITE	56.8	NULL	Medicare	English	MARRIED	Neuro Stepdown	7.6	K/uL	4.27	m/uL	NULL	NULL	NULL	NULL	381	K/uL	12.2	g/dL	13.4	%	35.3	%	NULL	NULL	NULL	NULL	NULL	NULL	130.75	mEq/L	3.13	mEq/L	9.45	mg/dL	90.25	mEq/L	153.25	mg/dL	6.1	%	18.5	mEq/L	NULL	NULL	NULL	NULL
11732764	56	M	WHITE	98.4	NULL	Medicaid	English	SINGLE	CVICU	3.2	K/uL	2.79	m/uL	2.03	K/uL	0.23	K/uL	60	K/uL	8.9	g/dL	18.75	%	29.85	%	NULL	NULL	NULL	NULL	NULL	NULL	140.5	mEq/L	4.5	mEq/L	7.75	mg/dL	105	mEq/L	91.5	mg/dL	NULL	NULL	13	mEq/L	7.33	units	51	mm Hg
11738511	85	M	WHITE	62.9	NULL	Medicare	English	MARRIED	Neuro SICU	16.6	K/uL	3.36	m/uL	NULL	NULL	NULL	NULL	93	K/uL	11.5	g/dL	17.3	%	37	%	3.1	g/dL	NULL	NULL	NULL	NULL	146	mEq/L	4.6	mEq/L	7.5	mg/dL	113	mEq/L	173	mg/dL	NULL	NULL	18	mEq/L	7.27	units	37	mm Hg
11738913	59	M	PORTUGUESE	79.4	NULL	Medicaid	English	SINGLE	Neuro Intermediate	7.8	K/uL	3.37	m/uL	NULL	NULL	NULL	NULL	214	K/uL	10.1	g/dL	16.7	%	31.5	%	2.2	g/dL	NULL	NULL	NULL	NULL	132	mEq/L	3.5	mEq/L	7.5	mg/dL	95	mEq/L	84	mg/dL	NULL	NULL	12	mEq/L	NULL	NULL	NULL	NULL
11741039	80	F	PATIENT DECLINED TO ANSWER	54	168	Medicare	English	WIDOWED	CVICU	15.9	K/uL	2.57	m/uL	10.94	K/uL	1.5	K/uL	94	K/uL	8.18	g/dL	14.1	%	25.32	%	NULL	NULL	NULL	NULL	NULL	NULL	139	mEq/L	4.1	mEq/L	7.9	mg/dL	109	mEq/L	89	mg/dL	NULL	NULL	8.5	mEq/L	7.34	units	47.2	mm Hg
11744705	70	F	UNKNOWN	63.3	NULL	Medicare	English	DIVORCED	CCU	33.15	K/uL	2.97	m/uL	NULL	NULL	NULL	NULL	269	K/uL	9.05	g/dL	15.8	%	28.9	%	NULL	NULL	NULL	NULL	NULL	NULL	139.75	mEq/L	3.88	mEq/L	8.68	mg/dL	112.25	mEq/L	288.25	mg/dL	NULL	NULL	17.25	mEq/L	7.3	units	30	mm Hg
11746452	64	F	WHITE	99	168	Private	English	DIVORCED	CVICU	17.47	K/uL	2.44	m/uL	11.54	K/uL	1.77	K/uL	201.67	K/uL	7.97	g/dL	12.67	%	24.88	%	NULL	NULL	NULL	NULL	NULL	NULL	139	mEq/L	4.2	mEq/L	NULL	NULL	110	mEq/L	111	mg/dL	NULL	NULL	9	mEq/L	7.35	units	41.14	mm Hg
11750652	79	M	WHITE	121.3	NULL	Medicare	English	MARRIED	MICU	6	K/uL	3.74	m/uL	NULL	NULL	NULL	NULL	154	K/uL	10.1	g/dL	20.3	%	35.5	%	NULL	NULL	NULL	NULL	NULL	NULL	141	mEq/L	4.4	mEq/L	8.5	mg/dL	88.5	mEq/L	129.5	mg/dL	NULL	NULL	10	mEq/L	7.33	units	93.33	mm Hg
11753327	72	M	WHITE	57	180	Medicare	English	MARRIED	MICU	9.93	K/uL	2.8	m/uL	NULL	NULL	NULL	NULL	229	K/uL	8.43	g/dL	19.47	%	26.43	%	2.3	g/dL	NULL	NULL	NULL	NULL	143	mEq/L	4.1	mEq/L	8	mg/dL	109	mEq/L	97	mg/dL	NULL	NULL	9	mEq/L	NULL	NULL	NULL	NULL
11754612	81	M	WHITE	71.95	173	Medicare	English	MARRIED	CVICU	14.4	K/uL	3.66	m/uL	11.44	K/uL	1.35	K/uL	157	K/uL	11.1	g/dL	12.8	%	34.18	%	NULL	NULL	NULL	NULL	NULL	NULL	136	mEq/L	4.6	mEq/L	8.4	mg/dL	103.5	mEq/L	208	mg/dL	NULL	NULL	9	mEq/L	7.36	units	47.64	mm Hg
11758767	76	F	UNKNOWN	52	NULL	Medicaid	English	NULL	TSICU	8.35	K/uL	2.81	m/uL	8.69	K/uL	0.37	K/uL	161.5	K/uL	8.95	g/dL	12.75	%	27.2	%	NULL	NULL	NULL	NULL	NULL	NULL	132	mEq/L	4.3	mEq/L	8.13	mg/dL	92.67	mEq/L	105.67	mg/dL	NULL	NULL	13.33	mEq/L	7.43	units	NULL	NULL
11759491	88	F	WHITE	104	NULL	Medicare	English	NULL	MICU/SICU	10.15	K/uL	4.4	m/uL	9.12	K/uL	0.56	K/uL	192.5	K/uL	12.8	g/dL	15.6	%	41.9	%	2.7	g/dL	NULL	NULL	NULL	NULL	142	mEq/L	3.75	mEq/L	8.1	mg/dL	106	mEq/L	107	mg/dL	NULL	NULL	11	mEq/L	7.27	units	50.33	mm Hg
11763262	52	F	WHITE	135.25	165	Private	English	MARRIED	CVICU	16.95	K/uL	3.62	m/uL	12.04	K/uL	3.92	K/uL	160	K/uL	11.13	g/dL	14.45	%	33.28	%	NULL	NULL	NULL	NULL	NULL	NULL	134	mEq/L	4	mEq/L	9.3	mg/dL	98	mEq/L	141.5	mg/dL	NULL	NULL	17	mEq/L	7.41	units	38.38	mm Hg
11765457	90	F	BLACK/AFRICAN AMERICAN	96.05	NULL	Medicare	English	WIDOWED	MICU/SICU	7.2	K/uL	2.94	m/uL	NULL	NULL	NULL	NULL	38	K/uL	9.4	g/dL	18.75	%	29.85	%	NULL	NULL	NULL	NULL	NULL	NULL	150	mEq/L	5.18	mEq/L	9.2	mg/dL	118.25	mEq/L	91.5	mg/dL	NULL	NULL	15.75	mEq/L	7.32	units	46	mm Hg
11770833	64	M	WHITE	72.9	180	Medicare	English	SINGLE	MICU/SICU	12.05	K/uL	3.21	m/uL	8.78	K/uL	1.93	K/uL	180	K/uL	11.25	g/dL	13.7	%	35.3	%	2.3	g/dL	NULL	NULL	NULL	NULL	133.5	mEq/L	4.05	mEq/L	7.7	mg/dL	103	mEq/L	134.5	mg/dL	NULL	NULL	10.5	mEq/L	7.31	units	45	mm Hg
11775818	68	F	BLACK/AFRICAN AMERICAN	71.2	NULL	Medicare	English	SINGLE	MICU/SICU	5.5	K/uL	4.99	m/uL	NULL	NULL	NULL	NULL	241	K/uL	13.2	g/dL	13.9	%	40.2	%	NULL	NULL	NULL	NULL	NULL	NULL	142	mEq/L	3.7	mEq/L	9.3	mg/dL	102	mEq/L	113	mg/dL	NULL	NULL	16	mEq/L	NULL	NULL	NULL	NULL
11779144	76	F	WHITE	76.0333	160	Private	English	WIDOWED	TSICU	11.9	K/uL	3.25	m/uL	NULL	NULL	NULL	NULL	359.25	K/uL	9.7	g/dL	16.4	%	31.85	%	NULL	NULL	NULL	NULL	NULL	NULL	142.25	mEq/L	4.28	mEq/L	8.3	mg/dL	109.5	mEq/L	144.75	mg/dL	NULL	NULL	11.5	mEq/L	7.34	units	43	mm Hg
11779764	84	F	WHITE	108	NULL	Medicare	English	MARRIED	MICU/SICU	7.3	K/uL	3.59	m/uL	NULL	NULL	NULL	NULL	254	K/uL	9.1	g/dL	21	%	31.3	%	3.4	g/dL	NULL	NULL	NULL	NULL	142	mEq/L	3.6	mEq/L	8.8	mg/dL	105	mEq/L	102	mg/dL	NULL	NULL	12	mEq/L	7.35	units	47.5	mm Hg
11782626	59	F	WHITE	100	178	Medicare	English	SINGLE	SICU	4.7	K/uL	2.43	m/uL	3.9	K/uL	0.68	K/uL	74.5	K/uL	7.95	g/dL	16.35	%	24.05	%	NULL	NULL	NULL	NULL	NULL	NULL	131.5	mEq/L	4.75	mEq/L	7.4	mg/dL	92.5	mEq/L	79	mg/dL	NULL	NULL	24.5	mEq/L	7.18	units	41	mm Hg
11784565	89	F	WHITE	52.2	152	Medicaid	English	WIDOWED	CCU	15.95	K/uL	3.44	m/uL	15.54	K/uL	1.26	K/uL	217.5	K/uL	11.2	g/dL	13.45	%	36.1	%	4	g/dL	NULL	NULL	NULL	NULL	136.67	mEq/L	4.4	mEq/L	8.33	mg/dL	102.33	mEq/L	130.67	mg/dL	NULL	NULL	12.33	mEq/L	7.29	units	53	mm Hg
11787740	51	M	AMERICAN INDIAN/ALASKA NATIVE	69.6	168	Medicaid	Spanish	SINGLE	MICU	8.18	K/uL	2.22	m/uL	NULL	NULL	NULL	NULL	47.6	K/uL	7.2	g/dL	24.8	%	21.56	%	3.4	g/dL	NULL	NULL	NULL	NULL	130.4	mEq/L	5.88	mEq/L	9.03	mg/dL	91.6	mEq/L	115.5	mg/dL	NULL	NULL	9.8	mEq/L	NULL	NULL	NULL	NULL
11787761	91	F	WHITE	98.7	NULL	Medicare	English	DIVORCED	MICU/SICU	3.6	K/uL	2.82	m/uL	2.9	K/uL	0.47	K/uL	75	K/uL	8.85	g/dL	13.75	%	27.35	%	NULL	NULL	NULL	NULL	NULL	NULL	132	mEq/L	4.6	mEq/L	9.55	mg/dL	97	mEq/L	90.5	mg/dL	NULL	NULL	10	mEq/L	NULL	NULL	NULL	NULL
11793183	58	F	WHITE	61.8	155	Private	English	MARRIED	MICU	26.66	K/uL	1.81	m/uL	NULL	NULL	NULL	NULL	119.8	K/uL	7.53	g/dL	22.5	%	20.63	%	3.7	g/dL	NULL	NULL	NULL	NULL	135.25	mEq/L	3.7	mEq/L	8.6	mg/dL	92.75	mEq/L	118.75	mg/dL	NULL	NULL	17	mEq/L	7.31	units	72.6	mm Hg
11798793	79	M	WHITE	58.7	NULL	Medicare	English	SINGLE	MICU/SICU	8.8	K/uL	2.99	m/uL	NULL	NULL	NULL	NULL	255	K/uL	8.7	g/dL	15	%	27	%	NULL	NULL	NULL	NULL	NULL	NULL	134	mEq/L	4.2	mEq/L	8.8	mg/dL	100	mEq/L	85	mg/dL	NULL	NULL	12	mEq/L	NULL	NULL	NULL	NULL
11799619	87	M	WHITE	57.5	180	Medicare	English	SINGLE	CCU	23.3	K/uL	5.47	m/uL	NULL	NULL	NULL	NULL	528	K/uL	12.35	g/dL	20.5	%	39.6	%	NULL	NULL	NULL	NULL	NULL	NULL	140.5	mEq/L	4.45	mEq/L	8.25	mg/dL	100	mEq/L	86	mg/dL	NULL	NULL	13	mEq/L	7.4	units	48	mm Hg
11804278	74	F	WHITE	65.85	165	Medicare	English	MARRIED	MICU	11.13	K/uL	3.8	m/uL	7.12	K/uL	1.55	K/uL	392.67	K/uL	10.6	g/dL	15.77	%	33.93	%	3.2	g/dL	NULL	NULL	NULL	NULL	145	mEq/L	4.7	mEq/L	9.03	mg/dL	111.25	mEq/L	137.25	mg/dL	NULL	NULL	13	mEq/L	7.28	units	50.33	mm Hg
11817632	85	M	WHITE	95.1	175	Medicare	English	MARRIED	CCU	11.5	K/uL	4.89	m/uL	NULL	NULL	NULL	NULL	293	K/uL	14.45	g/dL	13.75	%	45.85	%	NULL	NULL	NULL	NULL	NULL	NULL	137	mEq/L	4.6	mEq/L	9.15	mg/dL	105	mEq/L	109	mg/dL	NULL	NULL	12.5	mEq/L	7.41	units	34	mm Hg
11817840	67	F	WHITE	131.8	152	Medicare	English	MARRIED	MICU	14.6	K/uL	4.22	m/uL	NULL	NULL	NULL	NULL	336.5	K/uL	11.2	g/dL	16	%	36.85	%	3.5	g/dL	NULL	NULL	5.1	g/dL	128.5	mEq/L	4.73	mEq/L	8.13	mg/dL	84.75	mEq/L	128	mg/dL	NULL	NULL	11.25	mEq/L	7.27	units	78.6	mm Hg
11818101	53	M	HISPANIC/LATINO - PUERTO RICAN	96.65	178	Medicare	English	SINGLE	MICU	14.87	K/uL	3.14	m/uL	11.23	K/uL	0.71	K/uL	244.67	K/uL	9.27	g/dL	13.9	%	28.9	%	3.7	g/dL	NULL	NULL	NULL	NULL	137.33	mEq/L	4.63	mEq/L	8.83	mg/dL	102.67	mEq/L	204.33	mg/dL	NULL	NULL	15	mEq/L	7.4	units	43.86	mm Hg
11836669	64	M	WHITE	60.6	185	Medicare	English	MARRIED	Neuro Intermediate	1.9	K/uL	2	m/uL	NULL	NULL	NULL	NULL	76	K/uL	7.9	g/dL	15.9	%	23.4	%	NULL	NULL	NULL	NULL	NULL	NULL	129.75	mEq/L	4.3	mEq/L	8.6	mg/dL	96	mEq/L	96	mg/dL	4.3	%	8	mEq/L	NULL	NULL	NULL	NULL
11836722	83	F	HISPANIC/LATINO - DOMINICAN	70	NULL	Medicare	Spanish	SINGLE	SICU	14.58	K/uL	2.84	m/uL	NULL	NULL	NULL	NULL	86.25	K/uL	8.7	g/dL	15.08	%	26.38	%	NULL	NULL	NULL	NULL	NULL	NULL	136.67	mEq/L	4.9	mEq/L	7.17	mg/dL	96.67	mEq/L	109.33	mg/dL	NULL	NULL	23.67	mEq/L	7.19	units	51.5	mm Hg
11836787	65	M	WHITE	58.5	168	Medicaid	English	MARRIED	Neuro SICU	15.35	K/uL	4.16	m/uL	NULL	NULL	NULL	NULL	215	K/uL	13.5	g/dL	12.2	%	40.15	%	NULL	NULL	NULL	NULL	NULL	NULL	135	mEq/L	4.85	mEq/L	8.35	mg/dL	98.5	mEq/L	126.5	mg/dL	NULL	NULL	12.5	mEq/L	NULL	NULL	NULL	NULL
11839937	84	M	WHITE	82.9	180	Private	English	WIDOWED	TSICU	5.2	K/uL	4.19	m/uL	NULL	NULL	NULL	NULL	101.5	K/uL	13.25	g/dL	14.9	%	41.4	%	NULL	NULL	NULL	NULL	NULL	NULL	139	mEq/L	4.2	mEq/L	10.2	mg/dL	106	mEq/L	95	mg/dL	NULL	NULL	8	mEq/L	NULL	NULL	NULL	NULL
11841526	78	M	WHITE	88.2	168	Medicare	English	MARRIED	CVICU	12.33	K/uL	3.26	m/uL	7.26	K/uL	1.8	K/uL	150.67	K/uL	9.3	g/dL	13.7	%	30.74	%	NULL	NULL	NULL	NULL	NULL	NULL	138	mEq/L	4.4	mEq/L	NULL	NULL	104.5	mEq/L	127	mg/dL	NULL	NULL	12.5	mEq/L	7.42	units	46.25	mm Hg
11843797	92	F	WHITE	52	NULL	Medicare	English	WIDOWED	CCU	12.5	K/uL	3.75	m/uL	NULL	NULL	NULL	NULL	188	K/uL	11.2	g/dL	14.1	%	34.4	%	NULL	NULL	NULL	NULL	NULL	NULL	140	mEq/L	4.3	mEq/L	9.6	mg/dL	105	mEq/L	149	mg/dL	NULL	NULL	18	mEq/L	NULL	NULL	NULL	NULL
11844093	80	F	WHITE	60.5	168	Medicare	English	WIDOWED	MICU	11.7	K/uL	4.55	m/uL	NULL	NULL	NULL	NULL	18.33	K/uL	11.37	g/dL	15.9	%	37.8	%	2.35	g/dL	NULL	NULL	NULL	NULL	134.33	mEq/L	5.27	mEq/L	7.05	mg/dL	100.33	mEq/L	140	mg/dL	4.9	%	17.67	mEq/L	7.23	units	45.5	mm Hg
11849423	55	F	WHITE	113.4	NULL	Medicare	English	SINGLE	MICU/SICU	4.9	K/uL	3.9	m/uL	NULL	NULL	NULL	NULL	141	K/uL	11.9	g/dL	12.1	%	36.4	%	NULL	NULL	NULL	NULL	NULL	NULL	135	mEq/L	4.1	mEq/L	NULL	NULL	94	mEq/L	215	mg/dL	NULL	NULL	13	mEq/L	7.32	units	67.5	mm Hg
11856988	83	M	WHITE	70	NULL	Medicare	English	MARRIED	SICU	3.63	K/uL	2.69	m/uL	NULL	NULL	NULL	NULL	168.5	K/uL	7.33	g/dL	14.45	%	23.23	%	NULL	NULL	NULL	NULL	NULL	NULL	143	mEq/L	4.3	mEq/L	9.3	mg/dL	110	mEq/L	89	mg/dL	NULL	NULL	14	mEq/L	NULL	NULL	NULL	NULL
11858183	74	M	WHITE	72.8	178	Medicare	English	MARRIED	CVICU	17.5	K/uL	4.03	m/uL	14.07	K/uL	1.53	K/uL	194.67	K/uL	13.27	g/dL	16.83	%	39.3	%	NULL	NULL	NULL	NULL	NULL	NULL	139	mEq/L	4.5	mEq/L	8.5	mg/dL	109.5	mEq/L	140	mg/dL	NULL	NULL	10	mEq/L	7.35	units	42	mm Hg
11861079	54	F	WHITE	103.3	NULL	Medicare	English	WIDOWED	MICU/SICU	10.65	K/uL	3.85	m/uL	NULL	NULL	NULL	NULL	234	K/uL	10.4	g/dL	23.6	%	34.85	%	NULL	NULL	NULL	NULL	NULL	NULL	144.67	mEq/L	3.77	mEq/L	9.2	mg/dL	107	mEq/L	174.33	mg/dL	NULL	NULL	12.67	mEq/L	NULL	NULL	NULL	NULL
11863409	73	M	WHITE	70	168	Medicare	English	SINGLE	MICU	7.03	K/uL	2.54	m/uL	0.75	K/uL	0.19	K/uL	112.67	K/uL	8.33	g/dL	16.57	%	25.2	%	NULL	NULL	NULL	NULL	NULL	NULL	139.75	mEq/L	3.73	mEq/L	7.33	mg/dL	102.75	mEq/L	233.75	mg/dL	NULL	NULL	17.75	mEq/L	7.29	units	47.6	mm Hg
11871434	78	M	OTHER	74.4	165	Medicare	Russian	MARRIED	MICU/SICU	9.05	K/uL	4.18	m/uL	7.8	K/uL	1.87	K/uL	159.5	K/uL	12.4	g/dL	14.6	%	40.1	%	NULL	NULL	NULL	NULL	NULL	NULL	140.5	mEq/L	3.8	mEq/L	8.7	mg/dL	102.5	mEq/L	114.5	mg/dL	NULL	NULL	13.5	mEq/L	NULL	NULL	NULL	NULL
11871815	67	M	WHITE	83.55	180	Private	English	MARRIED	CVICU	21.85	K/uL	4.62	m/uL	NULL	NULL	NULL	NULL	137.5	K/uL	13.85	g/dL	12.4	%	41.3	%	NULL	NULL	NULL	NULL	NULL	NULL	138	mEq/L	4.75	mEq/L	8.1	mg/dL	102	mEq/L	210	mg/dL	NULL	NULL	12.5	mEq/L	7.34	units	45	mm Hg
11873441	85	F	UNKNOWN	98.8	NULL	Medicare	English	NULL	SICU	5.13	K/uL	4.31	m/uL	NULL	NULL	NULL	NULL	110	K/uL	10.9	g/dL	16.17	%	37	%	3.25	g/dL	NULL	NULL	NULL	NULL	133.5	mEq/L	3.85	mEq/L	9.1	mg/dL	93	mEq/L	141.5	mg/dL	NULL	NULL	9	mEq/L	7.3	units	75	mm Hg
11877319	70	M	WHITE	61.4	165	Medicare	English	SINGLE	ICU	22.55	K/uL	2.91	m/uL	19.62	K/uL	0.88	K/uL	154	K/uL	9.93	g/dL	15.2	%	32.15	%	NULL	NULL	NULL	NULL	NULL	NULL	142	mEq/L	5.2	mEq/L	7.73	mg/dL	109	mEq/L	81.67	mg/dL	NULL	NULL	14.67	mEq/L	7.27	units	43.8	mm Hg
11879946	54	F	WHITE	70.5333	NULL	Private	English	MARRIED	SICU	37.7	K/uL	3.52	m/uL	38.81	K/uL	5.54	K/uL	143.25	K/uL	9.1	g/dL	15.95	%	29.43	%	2.6	g/dL	NULL	NULL	NULL	NULL	145.33	mEq/L	3.57	mEq/L	7.33	mg/dL	106.67	mEq/L	124	mg/dL	NULL	NULL	15	mEq/L	7.32	units	60.33	mm Hg
11881853	69	F	BLACK/AFRICAN AMERICAN	65	NULL	Medicare	English	MARRIED	MICU	27.93	K/uL	2.64	m/uL	27.42	K/uL	0.86	K/uL	174.33	K/uL	7.23	g/dL	23.97	%	22.17	%	2.1	g/dL	NULL	NULL	NULL	NULL	143.67	mEq/L	3.4	mEq/L	7.23	mg/dL	115	mEq/L	76.33	mg/dL	NULL	NULL	19	mEq/L	7.4	units	20.5	mm Hg
11882869	66	M	WHITE	65.9	NULL	Medicare	English	SINGLE	Neuro Stepdown	NULL	NULL	NULL	NULL	NULL	NULL	NULL	NULL	212	K/uL	NULL	NULL	NULL	NULL	NULL	NULL	3.9	g/dL	3	g/dL	6.9	g/dL	136	mEq/L	3.8	mEq/L	NULL	NULL	102	mEq/L	97	mg/dL	4.3	%	17	mEq/L	NULL	NULL	NULL	NULL
11894825	81	M	WHITE	77	NULL	Medicare	English	WIDOWED	MICU	0.4	K/uL	2.85	m/uL	0.11	K/uL	0.27	K/uL	37	K/uL	8.4	g/dL	17.3	%	25.45	%	2.8	g/dL	NULL	NULL	NULL	NULL	138	mEq/L	4.25	mEq/L	8	mg/dL	105.5	mEq/L	102.5	mg/dL	NULL	NULL	10.5	mEq/L	7.36	units	39	mm Hg
11896645	47	F	WHITE	64.2	165	Medicaid	English	SINGLE	MICU	15.8	K/uL	3.58	m/uL	NULL	NULL	NULL	NULL	223	K/uL	11.5	g/dL	13.65	%	36.9	%	NULL	NULL	NULL	NULL	NULL	NULL	136	mEq/L	4.4	mEq/L	8.95	mg/dL	97	mEq/L	120.5	mg/dL	NULL	NULL	14.5	mEq/L	7.4	units	53	mm Hg
11897189	61	F	BLACK/AFRICAN AMERICAN	97	157	Medicaid	English	SINGLE	MICU	6.97	K/uL	4.6	m/uL	4.49	K/uL	1.25	K/uL	212	K/uL	13.63	g/dL	15.37	%	45.5	%	NULL	NULL	NULL	NULL	NULL	NULL	143.75	mEq/L	4.83	mEq/L	8.93	mg/dL	106.25	mEq/L	122.5	mg/dL	6.3	%	8.25	mEq/L	7.33	units	65.25	mm Hg
11898134	61	M	WHITE	106.6	180	Medicare	English	SINGLE	MICU	13.26	K/uL	2.29	m/uL	19.5	K/uL	0.85	K/uL	159.2	K/uL	6.82	g/dL	18	%	22.02	%	2.9	g/dL	NULL	NULL	NULL	NULL	137	mEq/L	4.67	mEq/L	8.2	mg/dL	100	mEq/L	122.33	mg/dL	NULL	NULL	15	mEq/L	7.39	units	39.5	mm Hg
11900070	87	M	WHITE - RUSSIAN	58.6	NULL	Medicaid	Russian	MARRIED	Neuro Intermediate	NULL	NULL	NULL	NULL	NULL	NULL	NULL	NULL	NULL	NULL	NULL	NULL	NULL	NULL	NULL	NULL	NULL	NULL	NULL	NULL	NULL	NULL	NULL	NULL	NULL	NULL	NULL	NULL	NULL	NULL	NULL	NULL	NULL	NULL	NULL	NULL	NULL	NULL	NULL	NULL
11901122	58	F	WHITE	90.4	NULL	Medicaid	English	WIDOWED	Neuro Intermediate	7.8	K/uL	3.81	m/uL	NULL	NULL	NULL	NULL	226	K/uL	11.9	g/dL	12.1	%	35.1	%	NULL	NULL	NULL	NULL	NULL	NULL	139	mEq/L	3.9	mEq/L	8.4	mg/dL	106	mEq/L	102	mg/dL	NULL	NULL	8	mEq/L	NULL	NULL	NULL	NULL
11905047	70	M	WHITE	85.8	168	Medicare	English	NULL	TSICU	10.45	K/uL	3.19	m/uL	NULL	NULL	NULL	NULL	272	K/uL	10.25	g/dL	15.35	%	34.2	%	NULL	NULL	NULL	NULL	NULL	NULL	135.25	mEq/L	5.23	mEq/L	7.98	mg/dL	94	mEq/L	214.75	mg/dL	NULL	NULL	18.75	mEq/L	7.14	units	74.89	mm Hg
11913898	75	M	WHITE	NULL	NULL	Medicare	English	MARRIED	MICU/SICU	6.43	K/uL	2.41	m/uL	NULL	NULL	NULL	NULL	10	K/uL	7.08	g/dL	14.65	%	21.85	%	NULL	NULL	NULL	NULL	NULL	NULL	140.5	mEq/L	4.35	mEq/L	8.6	mg/dL	98	mEq/L	117	mg/dL	NULL	NULL	13.5	mEq/L	7.4	units	63	mm Hg
11917689	79	F	WHITE	44.95	147	Medicare	English	MARRIED	TSICU	24.24	K/uL	4.04	m/uL	20.68	K/uL	0.82	K/uL	261.8	K/uL	11.22	g/dL	15.08	%	35.3	%	2	g/dL	NULL	NULL	NULL	NULL	135.83	mEq/L	4.3	mEq/L	8.73	mg/dL	101.5	mEq/L	136.17	mg/dL	NULL	NULL	12.67	mEq/L	7.39	units	35.73	mm Hg
11918260	63	M	WHITE	69.3	175	Medicare	English	SINGLE	SICU	16.6	K/uL	3.04	m/uL	NULL	NULL	NULL	NULL	395.75	K/uL	9.93	g/dL	12.9	%	31.68	%	3.25	g/dL	NULL	NULL	NULL	NULL	139.25	mEq/L	3.53	mEq/L	7.58	mg/dL	103.5	mEq/L	181.75	mg/dL	NULL	NULL	12.25	mEq/L	7.29	units	52.4	mm Hg
11920643	67	F	WHITE	108.6	163	Medicare	English	WIDOWED	MICU	7.4	K/uL	3.77	m/uL	NULL	NULL	NULL	NULL	135	K/uL	9.5	g/dL	14.93	%	32.53	%	3.3	g/dL	NULL	NULL	NULL	NULL	137.8	mEq/L	3.94	mEq/L	9.3	mg/dL	93.6	mEq/L	171	mg/dL	NULL	NULL	9	mEq/L	7.36	units	83.5	mm Hg
11922236	96	M	BLACK/AFRICAN AMERICAN	83.6	NULL	Medicaid	Kabuverdianu	WIDOWED	TSICU	11.3	K/uL	4.92	m/uL	NULL	NULL	NULL	NULL	157.5	K/uL	11.05	g/dL	16.5	%	35.65	%	NULL	NULL	NULL	NULL	NULL	NULL	137.5	mEq/L	4.15	mEq/L	9.25	mg/dL	95.5	mEq/L	208	mg/dL	NULL	NULL	14	mEq/L	7.36	units	55	mm Hg
11922514	64	M	WHITE	67.5	NULL	Other	English	SINGLE	MICU	19.5	K/uL	3.25	m/uL	NULL	NULL	NULL	NULL	89	K/uL	10.9	g/dL	18.5	%	31.5	%	2.7	g/dL	NULL	NULL	NULL	NULL	133.33	mEq/L	5.87	mEq/L	8.73	mg/dL	101	mEq/L	152.33	mg/dL	NULL	NULL	13.67	mEq/L	7.4	units	33	mm Hg
11922884	69	F	WHITE	72.9	157	Medicare	English	DIVORCED	CCU	14	K/uL	3.2	m/uL	NULL	NULL	NULL	NULL	159	K/uL	9.9	g/dL	16.1	%	32.6	%	NULL	NULL	NULL	NULL	NULL	NULL	145.5	mEq/L	3.95	mEq/L	9.18	mg/dL	106.25	mEq/L	125.25	mg/dL	NULL	NULL	18.5	mEq/L	7.4	units	31.5	mm Hg
11923670	49	F	WHITE	49.8	NULL	Medicaid	English	SINGLE	MICU/SICU	12.3	K/uL	4.1	m/uL	NULL	NULL	NULL	NULL	337	K/uL	11.6	g/dL	13.75	%	37.05	%	NULL	NULL	NULL	NULL	NULL	NULL	137.67	mEq/L	4.1	mEq/L	8.7	mg/dL	92	mEq/L	125.33	mg/dL	NULL	NULL	9.33	mEq/L	7.38	units	73	mm Hg
11926195	61	M	WHITE	70.6	NULL	Medicaid	English	SINGLE	SICU	7.8	K/uL	2.44	m/uL	NULL	NULL	NULL	NULL	237	K/uL	7.1	g/dL	15.6	%	23.75	%	NULL	NULL	NULL	NULL	NULL	NULL	138	mEq/L	4	mEq/L	8.6	mg/dL	103	mEq/L	102.5	mg/dL	NULL	NULL	10	mEq/L	7.47	units	NULL	NULL
11929103	68	F	WHITE	54.4	NULL	Medicare	English	DIVORCED	MICU/SICU	17.5	K/uL	3.6	m/uL	15.56	K/uL	1.28	K/uL	250	K/uL	10.25	g/dL	15.95	%	31.8	%	2.1	g/dL	NULL	NULL	NULL	NULL	137.5	mEq/L	4.2	mEq/L	8.35	mg/dL	108	mEq/L	78.5	mg/dL	NULL	NULL	13.5	mEq/L	NULL	NULL	NULL	NULL
11933057	37	M	UNKNOWN	78.3	183	Private	English	NULL	MICU	11.7	K/uL	5.08	m/uL	NULL	NULL	NULL	NULL	158.75	K/uL	15.73	g/dL	13	%	46.35	%	NULL	NULL	NULL	NULL	NULL	NULL	144.75	mEq/L	4.08	mEq/L	9.25	mg/dL	106.5	mEq/L	257.25	mg/dL	5.8	%	18.25	mEq/L	7.31	units	43.71	mm Hg
11941410	68	F	WHITE	62.75	NULL	Medicare	English	MARRIED	MICU/SICU	2.8	K/uL	3.77	m/uL	NULL	NULL	NULL	NULL	279	K/uL	9.5	g/dL	19.8	%	29.8	%	NULL	NULL	NULL	NULL	NULL	NULL	134	mEq/L	3.27	mEq/L	8.63	mg/dL	92	mEq/L	156	mg/dL	NULL	NULL	16	mEq/L	NULL	NULL	NULL	NULL
11941849	87	F	WHITE	57.7	NULL	Medicare	Modern Greek (1453-)	MARRIED	MICU/SICU	18.4	K/uL	2.75	m/uL	13.77	K/uL	2.27	K/uL	355.25	K/uL	8.45	g/dL	15.78	%	28.73	%	NULL	NULL	NULL	NULL	NULL	NULL	136.25	mEq/L	4.6	mEq/L	8.63	mg/dL	95	mEq/L	196.25	mg/dL	NULL	NULL	20.75	mEq/L	7.19	units	77	mm Hg
11942551	88	M	BLACK/CAPE VERDEAN	96.9	178	Medicare	Kabuverdianu	DIVORCED	MICU	13.6	K/uL	4.1	m/uL	NULL	NULL	NULL	NULL	281	K/uL	11.1	g/dL	16.7	%	34.8	%	NULL	NULL	NULL	NULL	NULL	NULL	138.5	mEq/L	4.45	mEq/L	9.05	mg/dL	97	mEq/L	180	mg/dL	NULL	NULL	13.5	mEq/L	7.37	units	53.25	mm Hg
11943609	81	M	WHITE	59.2	165	Medicare	English	MARRIED	CCU	20.7	K/uL	4.28	m/uL	19.43	K/uL	0.7	K/uL	259.67	K/uL	11.23	g/dL	17.13	%	39.9	%	3	g/dL	NULL	NULL	NULL	NULL	144.33	mEq/L	4.57	mEq/L	8.67	mg/dL	94	mEq/L	147.67	mg/dL	NULL	NULL	13.67	mEq/L	7.31	units	78.71	mm Hg
11944391	69	M	WHITE	88	178	Other	English	MARRIED	MICU	5.7	K/uL	4.35	m/uL	3.98	K/uL	0.66	K/uL	147.5	K/uL	13.85	g/dL	16.25	%	42.35	%	NULL	NULL	NULL	NULL	NULL	NULL	142	mEq/L	3.93	mEq/L	8.73	mg/dL	99.67	mEq/L	124.33	mg/dL	NULL	NULL	15.33	mEq/L	7.4	units	48.5	mm Hg
11947381	73	F	WHITE	75	NULL	Private	English	WIDOWED	MICU	10.1	K/uL	2.95	m/uL	NULL	NULL	NULL	NULL	96	K/uL	10.1	g/dL	15.6	%	30.3	%	NULL	NULL	NULL	NULL	NULL	NULL	132	mEq/L	5.4	mEq/L	8	mg/dL	94	mEq/L	113	mg/dL	NULL	NULL	30	mEq/L	7.08	units	28	mm Hg
11949990	41	F	WHITE	98	NULL	Medicare	English	SINGLE	MICU	8.15	K/uL	3.86	m/uL	6.17	K/uL	1.65	K/uL	553.5	K/uL	12.4	g/dL	13.25	%	36.35	%	3.9	g/dL	NULL	NULL	NULL	NULL	138.5	mEq/L	3.9	mEq/L	8.8	mg/dL	102.5	mEq/L	89.5	mg/dL	NULL	NULL	17	mEq/L	NULL	NULL	NULL	NULL
11959081	57	M	UNKNOWN	78.9	165	Medicare	English	SINGLE	MICU/SICU	16.9	K/uL	3.15	m/uL	15.41	K/uL	0.51	K/uL	117.33	K/uL	9.78	g/dL	16.93	%	28.55	%	4.2	g/dL	NULL	NULL	NULL	NULL	128.75	mEq/L	5.6	mEq/L	8.75	mg/dL	92.75	mEq/L	103.5	mg/dL	NULL	NULL	17.5	mEq/L	7.32	units	46.5	mm Hg
11963634	58	M	WHITE	101	NULL	Medicare	English	SINGLE	MICU	4.4	K/uL	3.6	m/uL	NULL	NULL	NULL	NULL	147	K/uL	11.8	g/dL	12.1	%	33.7	%	NULL	NULL	NULL	NULL	NULL	NULL	125	mEq/L	3.6	mEq/L	8.5	mg/dL	95	mEq/L	105	mg/dL	5	%	9	mEq/L	7.41	units	35.5	mm Hg
11964964	74	M	PORTUGUESE	91.7	NULL	Medicare	English	MARRIED	MICU	8.5	K/uL	4.24	m/uL	7.02	K/uL	0.34	K/uL	229	K/uL	11.8	g/dL	14.2	%	39.2	%	NULL	NULL	NULL	NULL	NULL	NULL	135	mEq/L	4	mEq/L	9.2	mg/dL	94	mEq/L	79	mg/dL	NULL	NULL	6	mEq/L	7.26	units	88.43	mm Hg
11968004	70	M	WHITE	107.633	NULL	Medicare	English	WIDOWED	CVICU	12.97	K/uL	2.6	m/uL	NULL	NULL	NULL	NULL	571.33	K/uL	7.68	g/dL	17.23	%	24.75	%	2.4	g/dL	NULL	NULL	NULL	NULL	131.33	mEq/L	4.53	mEq/L	7.43	mg/dL	94.67	mEq/L	114	mg/dL	NULL	NULL	15.67	mEq/L	7.39	units	49	mm Hg
11968982	65	M	UNKNOWN	61	170	Medicaid	English	NULL	MICU	13.93	K/uL	4.49	m/uL	12.41	K/uL	0.29	K/uL	208	K/uL	12.83	g/dL	12.83	%	39.73	%	3.6	g/dL	NULL	NULL	NULL	NULL	142.33	mEq/L	4.43	mEq/L	7.77	mg/dL	107	mEq/L	135.33	mg/dL	NULL	NULL	11.67	mEq/L	7.32	units	47.75	mm Hg
11977493	65	F	WHITE	54	160	Medicare	English	MARRIED	Neuro Intermediate	3.5	K/uL	2.9	m/uL	NULL	NULL	NULL	NULL	163	K/uL	9.4	g/dL	12.2	%	27.7	%	NULL	NULL	NULL	NULL	NULL	NULL	135	mEq/L	3.8	mEq/L	8.4	mg/dL	99	mEq/L	114	mg/dL	NULL	NULL	13	mEq/L	NULL	NULL	NULL	NULL
11984735	83	F	UNKNOWN	46.2	152	Medicare	English	WIDOWED	MICU/SICU	NULL	NULL	NULL	NULL	NULL	NULL	NULL	NULL	NULL	NULL	NULL	NULL	NULL	NULL	NULL	NULL	NULL	NULL	NULL	NULL	NULL	NULL	NULL	NULL	NULL	NULL	NULL	NULL	NULL	NULL	NULL	NULL	NULL	NULL	NULL	NULL	NULL	NULL	NULL	NULL
11988783	62	M	HISPANIC/LATINO - COLUMBIAN	67.2	NULL	Private	Spanish	SINGLE	MICU	11.7	K/uL	3.46	m/uL	NULL	NULL	NULL	NULL	34	K/uL	10.2	g/dL	14.8	%	29.8	%	2.2	g/dL	NULL	NULL	NULL	NULL	132.75	mEq/L	4.25	mEq/L	7.5	mg/dL	96.5	mEq/L	175.75	mg/dL	NULL	NULL	14.75	mEq/L	7.39	units	40	mm Hg
11989263	55	M	WHITE	145	165	Medicare	English	SINGLE	MICU	10.9	K/uL	4.49	m/uL	NULL	NULL	NULL	NULL	178	K/uL	13.9	g/dL	16.9	%	44.8	%	NULL	NULL	NULL	NULL	NULL	NULL	140.33	mEq/L	5.33	mEq/L	8.5	mg/dL	95	mEq/L	126	mg/dL	NULL	NULL	15	mEq/L	7.34	units	64.25	mm Hg
11990423	83	M	WHITE	120.7	NULL	Medicare	English	DIVORCED	MICU	17.35	K/uL	3.64	m/uL	NULL	NULL	NULL	NULL	149	K/uL	11.1	g/dL	14.8	%	36.9	%	3.4	g/dL	NULL	NULL	NULL	NULL	141.33	mEq/L	4.17	mEq/L	8.63	mg/dL	97.67	mEq/L	202.33	mg/dL	NULL	NULL	15	mEq/L	7.29	units	67.25	mm Hg
11991964	70	M	WHITE	80	NULL	Medicare	English	SINGLE	MICU	22	K/uL	4.68	m/uL	21.38	K/uL	0.3	K/uL	195.5	K/uL	14.3	g/dL	13.25	%	41.2	%	2.4	g/dL	NULL	NULL	NULL	NULL	132.5	mEq/L	3.7	mEq/L	8.9	mg/dL	97.5	mEq/L	103.5	mg/dL	NULL	NULL	14	mEq/L	7.35	units	35.5	mm Hg
11992613	66	F	WHITE	45.5	NULL	Medicare	English	WIDOWED	MICU	11	K/uL	3.87	m/uL	10.17	K/uL	0.53	K/uL	133	K/uL	11.5	g/dL	14.9	%	36.8	%	3.4	g/dL	NULL	NULL	NULL	NULL	139	mEq/L	4.1	mEq/L	9.2	mg/dL	94	mEq/L	99	mg/dL	NULL	NULL	11	mEq/L	7.42	units	59	mm Hg
11998587	68	F	WHITE	90	NULL	Medicare	English	MARRIED	Neuro SICU	8.5	K/uL	3.97	m/uL	NULL	NULL	NULL	NULL	300	K/uL	10.6	g/dL	13.2	%	34.2	%	NULL	NULL	NULL	NULL	NULL	NULL	143.33	mEq/L	3.4	mEq/L	8.35	mg/dL	104	mEq/L	94.5	mg/dL	NULL	NULL	13.5	mEq/L	7.39	units	46.5	mm Hg
11999829	73	F	UNKNOWN	111.567	157	Medicare	English	DIVORCED	MICU/SICU	14.89	K/uL	3.4	m/uL	15.81	K/uL	0	K/uL	88.86	K/uL	10.16	g/dL	18.09	%	30.4	%	2.33	g/dL	NULL	NULL	NULL	NULL	146	mEq/L	3.85	mEq/L	7.25	mg/dL	117.5	mEq/L	141	mg/dL	NULL	NULL	18	mEq/L	7.35	units	29.2	mm Hg
12009262	82	F	WHITE	89	163	Medicare	English	WIDOWED	Neuro Intermediate	7.9	K/uL	5.12	m/uL	NULL	NULL	NULL	NULL	172	K/uL	16.9	g/dL	13.7	%	51.7	%	4	g/dL	NULL	NULL	NULL	NULL	144	mEq/L	4	mEq/L	8.5	mg/dL	105	mEq/L	104	mg/dL	NULL	NULL	13	mEq/L	NULL	NULL	NULL	NULL
12009509	60	M	WHITE	96.8	NULL	Other	English	MARRIED	SICU	6.15	K/uL	4.05	m/uL	NULL	NULL	NULL	NULL	105	K/uL	13.25	g/dL	13.55	%	37.95	%	3.7	g/dL	NULL	NULL	NULL	NULL	138.5	mEq/L	4.8	mEq/L	8.4	mg/dL	101	mEq/L	135	mg/dL	NULL	NULL	11	mEq/L	NULL	NULL	NULL	NULL
12016373	77	F	WHITE	81.4	NULL	Medicare	English	NULL	Neuro SICU	5.6	K/uL	3.61	m/uL	NULL	NULL	NULL	NULL	258	K/uL	8.3	g/dL	18.1	%	28.1	%	3.5	g/dL	1.9	g/dL	5.4	g/dL	142	mEq/L	3.2	mEq/L	NULL	NULL	106	mEq/L	94	mg/dL	5.2	%	12	mEq/L	NULL	NULL	NULL	NULL
12018681	67	F	WHITE	73.2	165	Private	English	MARRIED	MICU	10.35	K/uL	3.27	m/uL	NULL	NULL	NULL	NULL	234	K/uL	9.75	g/dL	17.3	%	32.15	%	NULL	NULL	NULL	NULL	NULL	NULL	136	mEq/L	4.93	mEq/L	8.07	mg/dL	108.67	mEq/L	123.33	mg/dL	NULL	NULL	10	mEq/L	7.2	units	46.33	mm Hg
12019744	71	M	UNKNOWN	124	178	Medicare	English	MARRIED	CVICU	10.9	K/uL	3.12	m/uL	NULL	NULL	NULL	NULL	170	K/uL	10.55	g/dL	13.3	%	32.45	%	NULL	NULL	NULL	NULL	NULL	NULL	138	mEq/L	4.35	mEq/L	8.85	mg/dL	101.5	mEq/L	122.5	mg/dL	NULL	NULL	15.5	mEq/L	NULL	NULL	NULL	NULL
12028567	77	F	WHITE	70.2	NULL	Medicare	English	DIVORCED	TSICU	13.55	K/uL	3.41	m/uL	NULL	NULL	NULL	NULL	210.5	K/uL	9.8	g/dL	17.15	%	35.4	%	NULL	NULL	NULL	NULL	NULL	NULL	136.5	mEq/L	5.25	mEq/L	8.65	mg/dL	97	mEq/L	90	mg/dL	NULL	NULL	15.5	mEq/L	7.14	units	78.5	mm Hg
12029156	84	M	UNKNOWN	75	NULL	Private	English	NULL	SICU	7.95	K/uL	2.98	m/uL	NULL	NULL	NULL	NULL	49.83	K/uL	9	g/dL	15.37	%	28.48	%	2	g/dL	NULL	NULL	NULL	NULL	148.86	mEq/L	4.93	mEq/L	9	mg/dL	103.29	mEq/L	114.43	mg/dL	NULL	NULL	28.29	mEq/L	7.09	units	47.9	mm Hg
12030047	72	F	WHITE	46	NULL	Medicare	English	SINGLE	TSICU	10.6	K/uL	3.04	m/uL	NULL	NULL	NULL	NULL	252	K/uL	8.7	g/dL	19.4	%	28.3	%	NULL	NULL	NULL	NULL	NULL	NULL	140	mEq/L	3.7	mEq/L	8.5	mg/dL	104	mEq/L	184	mg/dL	NULL	NULL	10	mEq/L	7.2	units	72	mm Hg
12041160	82	M	WHITE	58.8	178	Medicare	English	SINGLE	TSICU	23.85	K/uL	3.38	m/uL	21.62	K/uL	0.51	K/uL	206.75	K/uL	10.08	g/dL	16.85	%	29.37	%	NULL	NULL	NULL	NULL	NULL	NULL	139.67	mEq/L	4.4	mEq/L	8.53	mg/dL	102	mEq/L	148.33	mg/dL	NULL	NULL	11.67	mEq/L	7.4	units	39.67	mm Hg
12044094	79	M	UNKNOWN	80	175	Medicare	English	MARRIED	MICU	21.63	K/uL	2.76	m/uL	NULL	NULL	NULL	NULL	73	K/uL	8.7	g/dL	15.4	%	25.97	%	3	g/dL	NULL	NULL	NULL	NULL	132.33	mEq/L	5	mEq/L	8.27	mg/dL	99.33	mEq/L	168.33	mg/dL	NULL	NULL	13.33	mEq/L	7.24	units	44	mm Hg
12048392	77	M	WHITE	59.8	178	Other	English	SINGLE	MICU	33.88	K/uL	2.4	m/uL	NULL	NULL	NULL	NULL	390.33	K/uL	7.05	g/dL	17.67	%	22.3	%	2.45	g/dL	NULL	NULL	NULL	NULL	145.67	mEq/L	5.6	mEq/L	8.5	mg/dL	99.4	mEq/L	93.33	mg/dL	NULL	NULL	25.67	mEq/L	7.54	units	29	mm Hg
12051291	67	F	WHITE	42.45	NULL	Medicare	English	MARRIED	TSICU	12.1	K/uL	2.9	m/uL	NULL	NULL	NULL	NULL	115	K/uL	8.6	g/dL	15.6	%	29.6	%	NULL	NULL	NULL	NULL	NULL	NULL	143	mEq/L	4.45	mEq/L	8.75	mg/dL	102.5	mEq/L	110	mg/dL	NULL	NULL	8	mEq/L	7.3	units	83.43	mm Hg
12056707	85	M	WHITE	82.6	NULL	Medicare	English	MARRIED	TSICU	9.35	K/uL	2.53	m/uL	6.83	K/uL	1.07	K/uL	222.5	K/uL	8.15	g/dL	13.45	%	25.8	%	NULL	NULL	NULL	NULL	NULL	NULL	136.5	mEq/L	4.4	mEq/L	8.55	mg/dL	105.5	mEq/L	106.5	mg/dL	NULL	NULL	11.5	mEq/L	NULL	NULL	NULL	NULL
12057569	66	M	WHITE	98.35	NULL	Other	English	MARRIED	TSICU	14.22	K/uL	3.76	m/uL	NULL	NULL	NULL	NULL	172.8	K/uL	11.28	g/dL	13.3	%	34.08	%	3.6	g/dL	NULL	NULL	NULL	NULL	139.75	mEq/L	5.53	mEq/L	7.95	mg/dL	105.75	mEq/L	168.75	mg/dL	NULL	NULL	13.75	mEq/L	7.18	units	59	mm Hg
12064623	72	F	BLACK/AFRICAN AMERICAN	64.7	NULL	Medicare	English	SINGLE	CVICU	8.25	K/uL	2.55	m/uL	NULL	NULL	NULL	NULL	247	K/uL	7.2	g/dL	18.55	%	22.8	%	NULL	NULL	NULL	NULL	NULL	NULL	133.5	mEq/L	4.25	mEq/L	8.7	mg/dL	98	mEq/L	122	mg/dL	NULL	NULL	15	mEq/L	NULL	NULL	NULL	NULL
12065065	69	M	WHITE	102.4	NULL	Medicare	English	MARRIED	TSICU	7.73	K/uL	3.5	m/uL	NULL	NULL	NULL	NULL	102.67	K/uL	11.13	g/dL	13.03	%	32.53	%	NULL	NULL	NULL	NULL	NULL	NULL	133.5	mEq/L	5.15	mEq/L	8.8	mg/dL	100.5	mEq/L	257	mg/dL	NULL	NULL	11.5	mEq/L	NULL	NULL	NULL	NULL
12067437	90	F	WHITE	57.4	NULL	Medicare	English	WIDOWED	MICU	9.65	K/uL	2.84	m/uL	NULL	NULL	NULL	NULL	157.5	K/uL	9	g/dL	13.5	%	27.2	%	NULL	NULL	NULL	NULL	NULL	NULL	136	mEq/L	3.5	mEq/L	8.6	mg/dL	99	mEq/L	109	mg/dL	NULL	NULL	18	mEq/L	NULL	NULL	NULL	NULL
12077336	72	M	WHITE	107.1	188	Medicare	English	MARRIED	CVICU	10.37	K/uL	2.74	m/uL	8.98	K/uL	1.49	K/uL	85.67	K/uL	8.77	g/dL	12.33	%	25.98	%	NULL	NULL	NULL	NULL	NULL	NULL	138	mEq/L	5.1	mEq/L	8.2	mg/dL	108	mEq/L	152	mg/dL	NULL	NULL	8	mEq/L	7.35	units	43.9	mm Hg
12078242	82	F	UNKNOWN	51	NULL	Medicare	English	NULL	TSICU	15.3	K/uL	3.39	m/uL	NULL	NULL	NULL	NULL	196.5	K/uL	10.3	g/dL	12.9	%	30.7	%	NULL	NULL	NULL	NULL	NULL	NULL	142	mEq/L	3.65	mEq/L	8.55	mg/dL	106	mEq/L	124	mg/dL	NULL	NULL	13.5	mEq/L	7.39	units	39.5	mm Hg
12083028	78	F	WHITE	74	NULL	Medicare	English	MARRIED	Neuro Intermediate	16.7	K/uL	2.44	m/uL	NULL	NULL	NULL	NULL	304	K/uL	7.7	g/dL	13.2	%	24.2	%	NULL	NULL	NULL	NULL	NULL	NULL	144	mEq/L	4.4	mEq/L	8.5	mg/dL	106	mEq/L	163	mg/dL	NULL	NULL	11	mEq/L	NULL	NULL	NULL	NULL
12092286	77	M	WHITE	99.7	178	Medicare	English	MARRIED	CVICU	15.8	K/uL	3.66	m/uL	9.51	K/uL	3.39	K/uL	127.67	K/uL	11.07	g/dL	12.37	%	32.55	%	NULL	NULL	NULL	NULL	NULL	NULL	138	mEq/L	4.35	mEq/L	NULL	NULL	107	mEq/L	120	mg/dL	NULL	NULL	10	mEq/L	7.44	units	35.43	mm Hg
12095050	68	F	WHITE	64	157	Medicare	English	MARRIED	CCU	19.03	K/uL	2.53	m/uL	NULL	NULL	NULL	NULL	63	K/uL	7.67	g/dL	15.8	%	23.13	%	2.6	g/dL	NULL	NULL	NULL	NULL	133	mEq/L	4	mEq/L	8.2	mg/dL	101	mEq/L	150	mg/dL	NULL	NULL	8	mEq/L	7.33	units	51.2	mm Hg
12113683	76	F	UNKNOWN	60	NULL	Medicare	English	NULL	CCU	18.3	K/uL	3.86	m/uL	15.36	K/uL	1.57	K/uL	219	K/uL	11	g/dL	15.8	%	35.7	%	3.5	g/dL	NULL	NULL	NULL	NULL	145	mEq/L	3.5	mEq/L	8.1	mg/dL	108	mEq/L	160	mg/dL	NULL	NULL	14	mEq/L	7.27	units	50.5	mm Hg
12122401	76	F	WHITE - OTHER EUROPEAN	37	NULL	Medicare	English	DIVORCED	TSICU	10.65	K/uL	4.49	m/uL	3.89	K/uL	6.22	K/uL	199.5	K/uL	13.95	g/dL	13.5	%	44.05	%	NULL	NULL	NULL	NULL	NULL	NULL	140	mEq/L	4.15	mEq/L	9.1	mg/dL	103	mEq/L	134.33	mg/dL	NULL	NULL	15.67	mEq/L	7.39	units	45	mm Hg
12122818	70	M	WHITE	76.7333	NULL	Medicare	English	MARRIED	CVICU	12.13	K/uL	2.21	m/uL	NULL	NULL	NULL	NULL	127	K/uL	6.73	g/dL	14.77	%	23.08	%	NULL	NULL	NULL	NULL	NULL	NULL	141	mEq/L	3.7	mEq/L	8.23	mg/dL	102.67	mEq/L	127.67	mg/dL	NULL	NULL	12.33	mEq/L	7.4	units	NULL	NULL
12130650	71	F	WHITE	55.6	NULL	Medicare	English	MARRIED	MICU/SICU	10.9	K/uL	3.25	m/uL	NULL	NULL	NULL	NULL	375	K/uL	10.5	g/dL	11.6	%	31.1	%	NULL	NULL	NULL	NULL	NULL	NULL	144.5	mEq/L	3.4	mEq/L	8.25	mg/dL	104.5	mEq/L	128.5	mg/dL	NULL	NULL	10	mEq/L	NULL	NULL	NULL	NULL
12134159	84	F	OTHER	46.9	NULL	Medicare	English	WIDOWED	MICU	14.5	K/uL	3.62	m/uL	NULL	NULL	NULL	NULL	393	K/uL	10.3	g/dL	13.3	%	33.9	%	NULL	NULL	NULL	NULL	NULL	NULL	147	mEq/L	4.3	mEq/L	9.8	mg/dL	107	mEq/L	116	mg/dL	NULL	NULL	18	mEq/L	NULL	NULL	NULL	NULL
12135369	59	F	BLACK/AFRICAN AMERICAN	70.6	NULL	Medicare	English	SINGLE	SICU	4.9	K/uL	3.58	m/uL	NULL	NULL	NULL	NULL	230	K/uL	10.8	g/dL	12.2	%	34.8	%	NULL	NULL	NULL	NULL	NULL	NULL	140	mEq/L	4.3	mEq/L	9.1	mg/dL	94	mEq/L	143	mg/dL	NULL	NULL	9	mEq/L	7.34	units	77	mm Hg
12140206	51	F	WHITE	70.35	160	Medicaid	English	SINGLE	TSICU	11.15	K/uL	4.31	m/uL	7.54	K/uL	2.23	K/uL	238	K/uL	11.75	g/dL	14.75	%	37.5	%	NULL	NULL	NULL	NULL	NULL	NULL	141	mEq/L	4.15	mEq/L	8.7	mg/dL	102.5	mEq/L	122.5	mg/dL	NULL	NULL	13.5	mEq/L	NULL	NULL	NULL	NULL
12140419	63	F	UNKNOWN	66.5	160	Medicaid	English	NULL	TSICU	16.1	K/uL	3.56	m/uL	NULL	NULL	NULL	NULL	126	K/uL	11	g/dL	14.47	%	33.57	%	NULL	NULL	NULL	NULL	NULL	NULL	149.83	mEq/L	4.1	mEq/L	8.8	mg/dL	118	mEq/L	137	mg/dL	5.7	%	9	mEq/L	7.43	units	34	mm Hg
12141252	87	F	WHITE	88	160	Medicare	English	WIDOWED	CCU	5.95	K/uL	4.98	m/uL	4.04	K/uL	1.31	K/uL	150	K/uL	13.9	g/dL	18.45	%	43.95	%	3.5	g/dL	NULL	NULL	NULL	NULL	136	mEq/L	3.8	mEq/L	8.9	mg/dL	97.5	mEq/L	130.5	mg/dL	NULL	NULL	13.5	mEq/L	NULL	NULL	NULL	NULL
12142332	69	F	WHITE	75	NULL	Medicare	English	SINGLE	MICU	13.7	K/uL	4.2	m/uL	NULL	NULL	NULL	NULL	259.5	K/uL	11.55	g/dL	14	%	39.7	%	NULL	NULL	NULL	NULL	NULL	NULL	143.5	mEq/L	4.35	mEq/L	9.5	mg/dL	94	mEq/L	100.5	mg/dL	NULL	NULL	13.5	mEq/L	7.38	units	82.5	mm Hg
12145128	74	M	WHITE	112.4	193	Medicare	English	MARRIED	CVICU	17.43	K/uL	3.1	m/uL	12.17	K/uL	1.85	K/uL	174.33	K/uL	9.3	g/dL	13.23	%	29.13	%	NULL	NULL	NULL	NULL	NULL	NULL	137	mEq/L	5.3	mEq/L	8.4	mg/dL	102.5	mEq/L	129	mg/dL	NULL	NULL	10	mEq/L	7.4	units	42.78	mm Hg
12147613	74	M	WHITE	71	173	Medicare	English	MARRIED	TSICU	7.8	K/uL	2.65	m/uL	NULL	NULL	NULL	NULL	150.75	K/uL	8.83	g/dL	14.3	%	25.3	%	NULL	NULL	NULL	NULL	NULL	NULL	132.25	mEq/L	4.4	mEq/L	7.98	mg/dL	98.25	mEq/L	106.5	mg/dL	NULL	NULL	12.75	mEq/L	7.33	units	42.2	mm Hg
12148165	73	M	WHITE	105.6	175	Medicare	English	MARRIED	CCU	12.1	K/uL	3.95	m/uL	11.29	K/uL	0.59	K/uL	383	K/uL	12.15	g/dL	13.95	%	37	%	3.65	g/dL	NULL	NULL	NULL	NULL	140.75	mEq/L	3.68	mEq/L	9.83	mg/dL	96.25	mEq/L	149.5	mg/dL	NULL	NULL	11.75	mEq/L	7.47	units	48	mm Hg
12153133	67	F	WHITE	37.15	NULL	Medicare	English	SINGLE	SICU	14.95	K/uL	2.63	m/uL	NULL	NULL	NULL	NULL	439.75	K/uL	7.68	g/dL	16.65	%	24.8	%	2.6	g/dL	NULL	NULL	NULL	NULL	138	mEq/L	4.4	mEq/L	8.2	mg/dL	101	mEq/L	124.5	mg/dL	NULL	NULL	13	mEq/L	NULL	NULL	NULL	NULL
12153884	76	F	WHITE	53.2	157	Medicare	English	SINGLE	MICU	7.85	K/uL	2.81	m/uL	5.31	K/uL	2.27	K/uL	179	K/uL	8.45	g/dL	17.2	%	26.7	%	2.6	g/dL	NULL	NULL	NULL	NULL	144	mEq/L	4.5	mEq/L	8.2	mg/dL	111.5	mEq/L	83	mg/dL	NULL	NULL	13	mEq/L	7.27	units	55	mm Hg
12155413	80	M	WHITE	108	173	Medicare	English	DIVORCED	MICU/SICU	21.9	K/uL	4.53	m/uL	21.46	K/uL	0.22	K/uL	177	K/uL	13.9	g/dL	14.2	%	43	%	NULL	NULL	NULL	NULL	NULL	NULL	136.67	mEq/L	4.7	mEq/L	8.17	mg/dL	98.33	mEq/L	215.33	mg/dL	6.6	%	13.67	mEq/L	7.38	units	58.5	mm Hg
12158943	75	F	WHITE	99.1	157	Medicare	English	DIVORCED	MICU	28.05	K/uL	3.21	m/uL	28.41	K/uL	0.83	K/uL	383.67	K/uL	10.27	g/dL	20.97	%	32.52	%	NULL	NULL	NULL	NULL	NULL	NULL	136.67	mEq/L	5.03	mEq/L	8.3	mg/dL	97.67	mEq/L	95.5	mg/dL	NULL	NULL	20.17	mEq/L	7.38	units	36	mm Hg
12160571	74	M	WHITE	82	155	Medicare	English	MARRIED	SICU	13.97	K/uL	3.48	m/uL	NULL	NULL	NULL	NULL	94.78	K/uL	9.53	g/dL	16.83	%	28.1	%	3.37	g/dL	NULL	NULL	NULL	NULL	135.83	mEq/L	4.17	mEq/L	7.9	mg/dL	102.33	mEq/L	198.83	mg/dL	NULL	NULL	15.17	mEq/L	7.35	units	41.73	mm Hg
12164856	63	M	WHITE	68	178	Private	English	DIVORCED	CCU	11.42	K/uL	4.34	m/uL	NULL	NULL	NULL	NULL	200.17	K/uL	14.24	g/dL	13.06	%	43.12	%	NULL	NULL	NULL	NULL	NULL	NULL	137.4	mEq/L	4.5	mEq/L	8.42	mg/dL	103	mEq/L	116.6	mg/dL	5.9	%	13.8	mEq/L	7.35	units	40.88	mm Hg
12168037	76	F	OTHER	106	168	Medicare	English	MARRIED	TSICU	13.36	K/uL	3.19	m/uL	12.17	K/uL	0.54	K/uL	86.64	K/uL	9.53	g/dL	15.4	%	29.81	%	2.5	g/dL	NULL	NULL	NULL	NULL	143.29	mEq/L	4.31	mEq/L	9.31	mg/dL	97.57	mEq/L	188.57	mg/dL	NULL	NULL	35.57	mEq/L	7.09	units	42.17	mm Hg
12172709	77	M	WHITE	77	178	Private	English	MARRIED	CVICU	19.43	K/uL	2.82	m/uL	11.89	K/uL	3.91	K/uL	176.67	K/uL	9.23	g/dL	14.8	%	28.6	%	NULL	NULL	NULL	NULL	NULL	NULL	142	mEq/L	4.47	mEq/L	8.2	mg/dL	108	mEq/L	144.5	mg/dL	NULL	NULL	9.5	mEq/L	7.4	units	40.57	mm Hg
12173207	41	F	WHITE	69.5	NULL	Medicare	English	NULL	MICU	21.4	K/uL	3	m/uL	17.96	K/uL	1.86	K/uL	394	K/uL	8.9	g/dL	15.4	%	28.6	%	NULL	NULL	NULL	NULL	NULL	NULL	136	mEq/L	4.2	mEq/L	8	mg/dL	99	mEq/L	112	mg/dL	NULL	NULL	11	mEq/L	NULL	NULL	NULL	NULL
12176861	82	M	ASIAN	54.3667	165	Medicaid	Hindi	MARRIED	CCU	13.8	K/uL	2.85	m/uL	NULL	NULL	NULL	NULL	139.5	K/uL	8.38	g/dL	17.6	%	26.5	%	NULL	NULL	NULL	NULL	NULL	NULL	138.67	mEq/L	4.97	mEq/L	8.6	mg/dL	105.67	mEq/L	156	mg/dL	NULL	NULL	17.67	mEq/L	7.33	units	44.67	mm Hg
12185693	91	M	UNKNOWN	50.9	NULL	Medicare	English	NULL	MICU/SICU	21.3	K/uL	3.07	m/uL	NULL	NULL	NULL	NULL	142	K/uL	9.3	g/dL	14.6	%	30.2	%	2.8	g/dL	NULL	NULL	NULL	NULL	141	mEq/L	5.25	mEq/L	8.3	mg/dL	106	mEq/L	114.5	mg/dL	NULL	NULL	10.5	mEq/L	7.27	units	57	mm Hg
12185789	64	M	WHITE	89.2	185	Private	English	MARRIED	MICU	19.89	K/uL	3.07	m/uL	16.06	K/uL	1.32	K/uL	113.5	K/uL	9.49	g/dL	15.44	%	27.13	%	2.9	g/dL	NULL	NULL	NULL	NULL	148	mEq/L	4.18	mEq/L	8.06	mg/dL	112.8	mEq/L	149.2	mg/dL	NULL	NULL	13.6	mEq/L	7.36	units	41.57	mm Hg
12186828	66	F	WHITE	65.8	152	Private	English	SINGLE	CVICU	15.27	K/uL	3.26	m/uL	NULL	NULL	NULL	NULL	183.33	K/uL	8.07	g/dL	16.5	%	26.33	%	2.5	g/dL	NULL	NULL	NULL	NULL	141.5	mEq/L	4.05	mEq/L	8.1	mg/dL	114	mEq/L	76	mg/dL	NULL	NULL	9	mEq/L	7.37	units	42.63	mm Hg
12189565	90	F	WHITE	66	NULL	Medicare	Persian	WIDOWED	SICU	4.9	K/uL	4.13	m/uL	NULL	NULL	NULL	NULL	175	K/uL	11.5	g/dL	13.7	%	34.9	%	NULL	NULL	NULL	NULL	NULL	NULL	122	mEq/L	4.55	mEq/L	9.25	mg/dL	85	mEq/L	109.5	mg/dL	NULL	NULL	10	mEq/L	NULL	NULL	NULL	NULL
12190919	73	M	BLACK/AFRICAN	63.35	183	Private	English	MARRIED	MICU	11.36	K/uL	4.21	m/uL	8.56	K/uL	0.85	K/uL	138.6	K/uL	12.82	g/dL	14.16	%	37.4	%	3.7	g/dL	NULL	NULL	NULL	NULL	141.6	mEq/L	5.24	mEq/L	8.4	mg/dL	106.2	mEq/L	178.2	mg/dL	NULL	NULL	14.4	mEq/L	7.23	units	58.71	mm Hg
12191004	75	F	UNKNOWN	48	163	Medicare	English	MARRIED	CCU	10.1	K/uL	4.51	m/uL	NULL	NULL	NULL	NULL	323.5	K/uL	12.6	g/dL	13.8	%	38.85	%	3.8	g/dL	NULL	NULL	NULL	NULL	138	mEq/L	3.85	mEq/L	9.15	mg/dL	97	mEq/L	107.5	mg/dL	NULL	NULL	16.5	mEq/L	NULL	NULL	NULL	NULL
12191344	76	F	WHITE	50.9	NULL	Medicare	English	DIVORCED	MICU	NULL	NULL	NULL	NULL	NULL	NULL	NULL	NULL	NULL	NULL	NULL	NULL	NULL	NULL	NULL	NULL	NULL	NULL	NULL	NULL	NULL	NULL	NULL	NULL	NULL	NULL	NULL	NULL	NULL	NULL	NULL	NULL	NULL	NULL	NULL	NULL	NULL	NULL	NULL	NULL
12199669	70	M	WHITE	91.3	NULL	Medicare	English	MARRIED	MICU/SICU	4.37	K/uL	3.43	m/uL	3.73	K/uL	0.35	K/uL	252	K/uL	8.83	g/dL	17.43	%	28.5	%	2.5	g/dL	NULL	NULL	NULL	NULL	132	mEq/L	3.47	mEq/L	7.8	mg/dL	98.67	mEq/L	117.33	mg/dL	NULL	NULL	9.33	mEq/L	7.38	units	44	mm Hg
12206678	91	F	WHITE	54.8	165	Medicare	English	WIDOWED	CCU	12.07	K/uL	3.88	m/uL	NULL	NULL	NULL	NULL	209.33	K/uL	10.77	g/dL	13.3	%	34.07	%	NULL	NULL	NULL	NULL	NULL	NULL	136.33	mEq/L	5.3	mEq/L	8.83	mg/dL	96	mEq/L	171	mg/dL	6.8	%	11.33	mEq/L	7.36	units	51.25	mm Hg
12209510	61	F	WHITE	87.8	NULL	Medicare	English	WIDOWED	Neuro Intermediate	6.8	K/uL	3.89	m/uL	NULL	NULL	NULL	NULL	216.5	K/uL	11.1	g/dL	14.25	%	36.2	%	NULL	NULL	NULL	NULL	NULL	NULL	142.5	mEq/L	4.15	mEq/L	9.25	mg/dL	109.5	mEq/L	107.5	mg/dL	4.3	%	10	mEq/L	NULL	NULL	NULL	NULL
12211122	67	M	BLACK/AFRICAN AMERICAN	87.3	NULL	Medicaid	English	SINGLE	CVICU	4.85	K/uL	3.54	m/uL	NULL	NULL	NULL	NULL	195	K/uL	10.1	g/dL	14.5	%	32.9	%	3.6	g/dL	NULL	NULL	NULL	NULL	146.5	mEq/L	4.5	mEq/L	10.25	mg/dL	106.5	mEq/L	89	mg/dL	NULL	NULL	11.5	mEq/L	7.4	units	50.5	mm Hg
12211707	48	M	WHITE - OTHER EUROPEAN	157.9	170	Private	English	MARRIED	MICU	9.3	K/uL	5.26	m/uL	NULL	NULL	NULL	NULL	201	K/uL	16.4	g/dL	16.6	%	54.2	%	NULL	NULL	NULL	NULL	NULL	NULL	137.5	mEq/L	5.35	mEq/L	8.6	mg/dL	92.5	mEq/L	113.5	mg/dL	NULL	NULL	8.5	mEq/L	7.25	units	90.75	mm Hg
12212988	68	M	WHITE	83.7	183	Medicare	English	MARRIED	CVICU	13.37	K/uL	3.78	m/uL	7.46	K/uL	0.69	K/uL	179.67	K/uL	11.07	g/dL	13.87	%	33.28	%	NULL	NULL	NULL	NULL	NULL	NULL	139	mEq/L	4.55	mEq/L	NULL	NULL	108.5	mEq/L	113	mg/dL	NULL	NULL	11.5	mEq/L	7.41	units	37.2	mm Hg
12217631	47	F	UNKNOWN	98.3	155	Private	English	NULL	TSICU	13.9	K/uL	3.28	m/uL	10.45	K/uL	2.26	K/uL	145.75	K/uL	9.78	g/dL	15.78	%	31.34	%	2.4	g/dL	NULL	NULL	NULL	NULL	135.33	mEq/L	4.7	mEq/L	7.7	mg/dL	102	mEq/L	137.67	mg/dL	NULL	NULL	18.33	mEq/L	7.29	units	43	mm Hg
12218564	68	F	WHITE	67.9	NULL	Medicare	English	SINGLE	MICU	37.9	K/uL	2.96	m/uL	35.45	K/uL	1.14	K/uL	203	K/uL	7.9	g/dL	15.85	%	25.15	%	2.25	g/dL	NULL	NULL	NULL	NULL	136.5	mEq/L	3.85	mEq/L	9.6	mg/dL	105	mEq/L	149	mg/dL	NULL	NULL	9	mEq/L	NULL	NULL	NULL	NULL
12221629	75	F	UNKNOWN	56	NULL	Medicare	English	MARRIED	CCU	23.57	K/uL	4.29	m/uL	NULL	NULL	NULL	NULL	183.67	K/uL	12.67	g/dL	13.07	%	40.17	%	3.3	g/dL	NULL	NULL	NULL	NULL	136	mEq/L	3.83	mEq/L	7.6	mg/dL	104.33	mEq/L	171.33	mg/dL	NULL	NULL	19	mEq/L	7.29	units	40.29	mm Hg
12228900	51	M	WHITE	137.6	173	Private	English	MARRIED	CVICU	11.1	K/uL	4.67	m/uL	NULL	NULL	NULL	NULL	133	K/uL	14.9	g/dL	12.7	%	45	%	NULL	NULL	NULL	NULL	NULL	NULL	137.5	mEq/L	4.2	mEq/L	8.4	mg/dL	98.5	mEq/L	108	mg/dL	NULL	NULL	14	mEq/L	NULL	NULL	NULL	NULL
12230431	44	F	WHITE - OTHER EUROPEAN	113	NULL	Medicaid	English	MARRIED	TSICU	9.13	K/uL	4.54	m/uL	NULL	NULL	NULL	NULL	165	K/uL	12.8	g/dL	15.37	%	43.93	%	3.4	g/dL	NULL	NULL	NULL	NULL	143.67	mEq/L	4.43	mEq/L	9.07	mg/dL	100.33	mEq/L	127.67	mg/dL	NULL	NULL	13.33	mEq/L	7.25	units	80.75	mm Hg
12232510	61	M	WHITE - OTHER EUROPEAN	82	NULL	Medicare	English	MARRIED	CCU	6.6	K/uL	2.93	m/uL	NULL	NULL	NULL	NULL	111.5	K/uL	10.8	g/dL	15.55	%	32.05	%	NULL	NULL	NULL	NULL	NULL	NULL	136.67	mEq/L	4.47	mEq/L	8.15	mg/dL	99.33	mEq/L	119.67	mg/dL	NULL	NULL	20.33	mEq/L	7.34	units	44	mm Hg
12234096	69	M	UNABLE TO OBTAIN	81.2667	NULL	Medicare	English	NULL	MICU	20.6	K/uL	4.03	m/uL	19.66	K/uL	0.97	K/uL	202.5	K/uL	11.15	g/dL	17.1	%	36.3	%	4.1	g/dL	NULL	NULL	NULL	NULL	140	mEq/L	3.87	mEq/L	9.77	mg/dL	97	mEq/L	170.33	mg/dL	NULL	NULL	12	mEq/L	7.38	units	60.33	mm Hg
12237506	56	F	WHITE	77.3	NULL	Medicaid	English	MARRIED	CCU	15	K/uL	3.18	m/uL	11.45	K/uL	2.29	K/uL	195	K/uL	8.1	g/dL	14.7	%	27.9	%	NULL	NULL	NULL	NULL	NULL	NULL	144	mEq/L	3.3	mEq/L	7.9	mg/dL	105	mEq/L	101	mg/dL	NULL	NULL	12	mEq/L	7.4	units	48	mm Hg
12238622	88	M	WHITE	72	NULL	Medicare	English	WIDOWED	MICU	18.75	K/uL	4.02	m/uL	NULL	NULL	NULL	NULL	269	K/uL	11.35	g/dL	15.2	%	38.05	%	NULL	NULL	NULL	NULL	NULL	NULL	143	mEq/L	4.45	mEq/L	8.6	mg/dL	106.5	mEq/L	129.5	mg/dL	NULL	NULL	12.5	mEq/L	7.28	units	55.86	mm Hg
12239433	65	M	WHITE	91.55	180	Private	English	MARRIED	CVICU	14.97	K/uL	3.02	m/uL	8.95	K/uL	2.13	K/uL	130.67	K/uL	9.87	g/dL	12.2	%	29.93	%	NULL	NULL	NULL	NULL	NULL	NULL	138.33	mEq/L	4.23	mEq/L	NULL	NULL	107.67	mEq/L	108	mg/dL	NULL	NULL	9.5	mEq/L	7.38	units	42.17	mm Hg
12247734	60	F	WHITE	62.35	166	Medicare	English	MARRIED	CVICU	14.53	K/uL	2.8	m/uL	7.8	K/uL	1.89	K/uL	158	K/uL	8.73	g/dL	18.63	%	26.6	%	NULL	NULL	NULL	NULL	NULL	NULL	137	mEq/L	4.9	mEq/L	NULL	NULL	102.5	mEq/L	91	mg/dL	NULL	NULL	12	mEq/L	7.44	units	38	mm Hg
12250551	76	M	UNKNOWN	81.6	NULL	Medicare	English	MARRIED	MICU/SICU	6.9	K/uL	2.54	m/uL	NULL	NULL	NULL	NULL	18	K/uL	8.4	g/dL	21.6	%	29.3	%	NULL	NULL	NULL	NULL	NULL	NULL	145	mEq/L	4.9	mEq/L	9.2	mg/dL	96	mEq/L	68	mg/dL	NULL	NULL	26	mEq/L	7.35	units	48.5	mm Hg
12250606	48	M	WHITE	95.4	NULL	Medicaid	English	DIVORCED	MICU	38.45	K/uL	3.02	m/uL	NULL	NULL	NULL	NULL	363.25	K/uL	9.33	g/dL	23.28	%	29.35	%	2	g/dL	NULL	NULL	NULL	NULL	129.25	mEq/L	3.43	mEq/L	7.8	mg/dL	84	mEq/L	279.75	mg/dL	NULL	NULL	34.25	mEq/L	7.23	units	32.75	mm Hg
12252484	79	M	WHITE - OTHER EUROPEAN	59.5	NULL	Medicare	English	WIDOWED	TSICU	10.85	K/uL	3.12	m/uL	NULL	NULL	NULL	NULL	358.5	K/uL	8.1	g/dL	20.45	%	27.1	%	NULL	NULL	NULL	NULL	NULL	NULL	140	mEq/L	5.05	mEq/L	8.7	mg/dL	102	mEq/L	127	mg/dL	NULL	NULL	13.5	mEq/L	NULL	NULL	NULL	NULL
12256613	85	M	WHITE	100.3	NULL	Medicare	English	NULL	SICU	5.93	K/uL	4.3	m/uL	4.8	K/uL	0.8	K/uL	121	K/uL	12.8	g/dL	19.83	%	39.93	%	NULL	NULL	NULL	NULL	NULL	NULL	137	mEq/L	3.75	mEq/L	8.6	mg/dL	101.5	mEq/L	159.5	mg/dL	NULL	NULL	15	mEq/L	7.41	units	44	mm Hg
12257086	62	M	WHITE	90	173	Private	English	DIVORCED	CVICU	15.78	K/uL	3.11	m/uL	17.85	K/uL	1.76	K/uL	133.14	K/uL	9.68	g/dL	12.93	%	29.34	%	NULL	NULL	NULL	NULL	NULL	NULL	144.5	mEq/L	4.17	mEq/L	8.85	mg/dL	109	mEq/L	116.5	mg/dL	NULL	NULL	11.5	mEq/L	7.39	units	41.88	mm Hg
12259084	61	F	WHITE	87.5	NULL	Medicaid	English	SINGLE	Neuro Intermediate	9.5	K/uL	3.48	m/uL	NULL	NULL	NULL	NULL	239	K/uL	10.2	g/dL	15.5	%	32.4	%	NULL	NULL	NULL	NULL	NULL	NULL	137	mEq/L	3.5	mEq/L	8.7	mg/dL	100	mEq/L	125	mg/dL	NULL	NULL	8	mEq/L	7.24	units	61	mm Hg
12261947	79	F	WHITE	81.6	160	Medicare	English	MARRIED	CVICU	12.6	K/uL	3.65	m/uL	NULL	NULL	NULL	NULL	162.5	K/uL	11.9	g/dL	11.9	%	35.8	%	NULL	NULL	NULL	NULL	NULL	NULL	139.5	mEq/L	4.03	mEq/L	8.35	mg/dL	105	mEq/L	131.5	mg/dL	NULL	NULL	11.5	mEq/L	NULL	NULL	NULL	NULL
12262929	56	F	WHITE	118.2	157	Medicare	English	SINGLE	MICU/SICU	17.1	K/uL	3.55	m/uL	15.05	K/uL	1.16	K/uL	266	K/uL	11.5	g/dL	13.1	%	34.5	%	NULL	NULL	NULL	NULL	NULL	NULL	137	mEq/L	4.6	mEq/L	8.5	mg/dL	104	mEq/L	148	mg/dL	NULL	NULL	19	mEq/L	7.33	units	40	mm Hg
12271214	79	F	WHITE	79.1	160	Private	English	WIDOWED	CVICU	11.5	K/uL	2.8	m/uL	8.74	K/uL	2.38	K/uL	115	K/uL	8.83	g/dL	11.33	%	26.08	%	NULL	NULL	NULL	NULL	NULL	NULL	136	mEq/L	4.45	mEq/L	NULL	NULL	110	mEq/L	126	mg/dL	NULL	NULL	9.5	mEq/L	7.36	units	36.09	mm Hg
12271507	65	F	WHITE	66.75	165	Medicare	English	MARRIED	CVICU	8.43	K/uL	3.48	m/uL	11.74	K/uL	1.18	K/uL	161.33	K/uL	10.2	g/dL	20.07	%	33.9	%	NULL	NULL	NULL	NULL	NULL	NULL	138.5	mEq/L	4.67	mEq/L	8.1	mg/dL	93.5	mEq/L	87	mg/dL	5	%	11	mEq/L	7.46	units	48.75	mm Hg
12276602	67	M	UNKNOWN	72	185	Private	English	MARRIED	CCU	6.35	K/uL	2.92	m/uL	4.7	K/uL	0.05	K/uL	103.25	K/uL	8.93	g/dL	13.48	%	26.73	%	2.3	g/dL	NULL	NULL	NULL	NULL	123	mEq/L	4	mEq/L	7.93	mg/dL	92.75	mEq/L	119	mg/dL	5	%	12.75	mEq/L	7.31	units	44	mm Hg
12280226	70	M	WHITE	53	NULL	Medicare	English	DIVORCED	MICU	6.1	K/uL	3.38	m/uL	NULL	NULL	NULL	NULL	159.5	K/uL	11.05	g/dL	17.75	%	31.05	%	1.8	g/dL	NULL	NULL	NULL	NULL	135	mEq/L	3.3	mEq/L	6.3	mg/dL	98	mEq/L	66	mg/dL	NULL	NULL	12	mEq/L	NULL	NULL	NULL	NULL
12280833	73	F	WHITE	55	157	Medicare	English	MARRIED	TSICU	8.73	K/uL	3.05	m/uL	NULL	NULL	NULL	NULL	208	K/uL	9.87	g/dL	13.7	%	30.07	%	NULL	NULL	NULL	NULL	NULL	NULL	138.5	mEq/L	4	mEq/L	8.4	mg/dL	102	mEq/L	116	mg/dL	NULL	NULL	16	mEq/L	7.41	units	42	mm Hg
12287736	66	F	WHITE	54.3	NULL	Medicare	English	WIDOWED	MICU/SICU	16.8	K/uL	3.14	m/uL	14.23	K/uL	1.1	K/uL	336.33	K/uL	9.33	g/dL	15.9	%	28.67	%	2.5	g/dL	NULL	NULL	NULL	NULL	139	mEq/L	3.27	mEq/L	7.67	mg/dL	106	mEq/L	82.67	mg/dL	NULL	NULL	15.67	mEq/L	7.31	units	38	mm Hg
12293471	62	M	WHITE	117	183	Medicare	English	SINGLE	MICU/SICU	4.1	K/uL	2.5	m/uL	2.86	K/uL	1.85	K/uL	46	K/uL	7.45	g/dL	14	%	23.4	%	NULL	NULL	NULL	NULL	NULL	NULL	140.5	mEq/L	3.9	mEq/L	8.7	mg/dL	101	mEq/L	110.5	mg/dL	NULL	NULL	11.5	mEq/L	NULL	NULL	NULL	NULL
12297145	54	F	HISPANIC/LATINO - PUERTO RICAN	51.2	152	Medicare	English	DIVORCED	TSICU	40	K/uL	4.81	m/uL	35.6	K/uL	2.8	K/uL	173	K/uL	14.8	g/dL	18.5	%	49.3	%	NULL	NULL	NULL	NULL	NULL	NULL	NULL	NULL	NULL	NULL	NULL	NULL	NULL	NULL	NULL	NULL	NULL	NULL	NULL	NULL	7.11	units	47.33	mm Hg
12297168	78	M	UNKNOWN	84.6	130	Medicare	English	MARRIED	MICU	3.83	K/uL	2.84	m/uL	NULL	NULL	NULL	NULL	156.33	K/uL	9.1	g/dL	15.27	%	26.6	%	3.1	g/dL	NULL	NULL	NULL	NULL	139.5	mEq/L	3.8	mEq/L	8.1	mg/dL	100.5	mEq/L	141.5	mg/dL	NULL	NULL	13	mEq/L	7.51	units	35.75	mm Hg
12298456	76	M	WHITE	66.4	NULL	Medicaid	English	SINGLE	MICU	4.4	K/uL	3.09	m/uL	NULL	NULL	NULL	NULL	59	K/uL	10.5	g/dL	14	%	29.7	%	NULL	NULL	NULL	NULL	NULL	NULL	119	mEq/L	4.35	mEq/L	6.95	mg/dL	91.5	mEq/L	109	mg/dL	NULL	NULL	7.5	mEq/L	7.38	units	35.5	mm Hg
12298841	59	M	UNKNOWN	90	NULL	Medicaid	English	NULL	TSICU	NULL	NULL	NULL	NULL	NULL	NULL	NULL	NULL	NULL	NULL	NULL	NULL	NULL	NULL	NULL	NULL	NULL	NULL	NULL	NULL	NULL	NULL	NULL	NULL	NULL	NULL	NULL	NULL	NULL	NULL	NULL	NULL	NULL	NULL	NULL	NULL	7.12	units	47.5	mm Hg
12299417	64	F	OTHER	68.4	NULL	Medicare	English	SINGLE	TSICU	20	K/uL	4.85	m/uL	NULL	NULL	NULL	NULL	195	K/uL	14.3	g/dL	13.8	%	45.4	%	NULL	NULL	NULL	NULL	NULL	NULL	139	mEq/L	4.8	mEq/L	8.4	mg/dL	98	mEq/L	129	mg/dL	NULL	NULL	12	mEq/L	7.33	units	63.25	mm Hg
12304080	76	M	BLACK/AFRICAN AMERICAN	58.5	NULL	Medicare	English	SINGLE	Neuro Intermediate	8	K/uL	3.46	m/uL	NULL	NULL	NULL	NULL	182	K/uL	10.9	g/dL	13.5	%	33	%	NULL	NULL	NULL	NULL	NULL	NULL	138.5	mEq/L	3.15	mEq/L	9	mg/dL	97	mEq/L	93	mg/dL	4.7	%	15.5	mEq/L	NULL	NULL	NULL	NULL
12305719	84	M	UNKNOWN	67.7	NULL	Medicare	Italian	MARRIED	Neuro Intermediate	9.4	K/uL	3.85	m/uL	NULL	NULL	NULL	NULL	276	K/uL	11.5	g/dL	14.1	%	35.2	%	NULL	NULL	NULL	NULL	NULL	NULL	137	mEq/L	4.4	mEq/L	9.5	mg/dL	96	mEq/L	108	mg/dL	NULL	NULL	17	mEq/L	NULL	NULL	NULL	NULL
12307009	72	M	WHITE	90	NULL	Medicare	English	MARRIED	CVICU	10.67	K/uL	2.6	m/uL	NULL	NULL	NULL	NULL	486.33	K/uL	7.9	g/dL	13.2	%	24.3	%	2.9	g/dL	NULL	NULL	NULL	NULL	136.5	mEq/L	4.4	mEq/L	8.75	mg/dL	99	mEq/L	106.5	mg/dL	NULL	NULL	10.5	mEq/L	NULL	NULL	NULL	NULL
12311092	63	M	WHITE	69	NULL	Medicaid	English	SINGLE	TSICU	8.1	K/uL	4.69	m/uL	NULL	NULL	NULL	NULL	251	K/uL	15.3	g/dL	13	%	44.6	%	3.8	g/dL	NULL	NULL	NULL	NULL	131	mEq/L	4.8	mEq/L	9.8	mg/dL	92	mEq/L	159	mg/dL	NULL	NULL	10	mEq/L	NULL	NULL	NULL	NULL
12311245	74	M	WHITE	68.45	157	Medicare	English	SINGLE	MICU	20.45	K/uL	4	m/uL	19.78	K/uL	0.6	K/uL	313	K/uL	11.7	g/dL	15.95	%	36.15	%	NULL	NULL	NULL	NULL	NULL	NULL	142.5	mEq/L	4.15	mEq/L	10.4	mg/dL	105	mEq/L	164.5	mg/dL	NULL	NULL	11.5	mEq/L	7.39	units	48	mm Hg
12314229	83	F	BLACK/AFRICAN AMERICAN	54.3	152	Medicare	English	NULL	CVICU	7	K/uL	3.47	m/uL	NULL	NULL	NULL	NULL	281	K/uL	9.3	g/dL	16.2	%	31.1	%	NULL	NULL	NULL	NULL	NULL	NULL	143	mEq/L	3.8	mEq/L	8.8	mg/dL	106	mEq/L	113	mg/dL	NULL	NULL	12	mEq/L	NULL	NULL	NULL	NULL
12338003	58	M	WHITE	80.8	NULL	Private	English	MARRIED	TSICU	17.75	K/uL	3.13	m/uL	15.39	K/uL	0.49	K/uL	553	K/uL	9.2	g/dL	14.05	%	29.95	%	NULL	NULL	NULL	NULL	NULL	NULL	138	mEq/L	4.03	mEq/L	8.37	mg/dL	99	mEq/L	142	mg/dL	NULL	NULL	10.67	mEq/L	7.46	units	48.25	mm Hg
12342656	91	F	WHITE	84	NULL	Medicare	English	MARRIED	Neuro Intermediate	10.35	K/uL	4.13	m/uL	9.25	K/uL	1.4	K/uL	201	K/uL	13	g/dL	13.5	%	38.7	%	NULL	NULL	NULL	NULL	NULL	NULL	138.5	mEq/L	4.35	mEq/L	9.2	mg/dL	99.5	mEq/L	127.5	mg/dL	NULL	NULL	13.5	mEq/L	NULL	NULL	NULL	NULL
12346890	54	F	WHITE	53.1	163	Medicaid	English	SINGLE	CVICU	22.4	K/uL	3.7	m/uL	NULL	NULL	NULL	NULL	238	K/uL	11.3	g/dL	12.8	%	36.2	%	NULL	NULL	NULL	NULL	NULL	NULL	138.5	mEq/L	4.35	mEq/L	8.3	mg/dL	104.5	mEq/L	152	mg/dL	NULL	NULL	10.5	mEq/L	7.37	units	44.5	mm Hg
12354224	66	F	WHITE - OTHER EUROPEAN	57	NULL	Medicare	English	DIVORCED	Neuro Intermediate	7.3	K/uL	3.31	m/uL	NULL	NULL	NULL	NULL	286	K/uL	10.5	g/dL	13.1	%	31.6	%	NULL	NULL	NULL	NULL	NULL	NULL	143	mEq/L	3.8	mEq/L	8.5	mg/dL	108	mEq/L	93	mg/dL	NULL	NULL	13	mEq/L	NULL	NULL	NULL	NULL
12354911	85	M	WHITE	47.2	NULL	Medicare	English	MARRIED	SICU	22.25	K/uL	4.26	m/uL	21.25	K/uL	0.63	K/uL	690.5	K/uL	12	g/dL	15.7	%	38.7	%	3.4	g/dL	NULL	NULL	NULL	NULL	139.5	mEq/L	5.55	mEq/L	8.95	mg/dL	103.5	mEq/L	142	mg/dL	NULL	NULL	12.5	mEq/L	7.36	units	45	mm Hg
12357538	92	M	UNKNOWN	73.3	NULL	Medicare	English	MARRIED	MICU	8.98	K/uL	2.54	m/uL	NULL	NULL	NULL	NULL	137.5	K/uL	7.55	g/dL	17.85	%	23.1	%	NULL	NULL	NULL	NULL	NULL	NULL	142.33	mEq/L	3.87	mEq/L	8.57	mg/dL	106.67	mEq/L	125.33	mg/dL	NULL	NULL	15	mEq/L	7.36	units	NULL	NULL
12362110	72	F	HISPANIC/LATINO - PUERTO RICAN	45.2	NULL	Medicare	Spanish	SINGLE	MICU/SICU	6.6	K/uL	3.46	m/uL	NULL	NULL	NULL	NULL	250	K/uL	10.9	g/dL	13.7	%	34.4	%	NULL	NULL	NULL	NULL	NULL	NULL	143	mEq/L	3.8	mEq/L	7.6	mg/dL	109	mEq/L	92	mg/dL	NULL	NULL	11	mEq/L	NULL	NULL	NULL	NULL
12364762	69	M	WHITE	NULL	NULL	Medicare	English	MARRIED	CCU	6.97	K/uL	3.68	m/uL	5.15	K/uL	1.57	K/uL	111.67	K/uL	11.6	g/dL	12.63	%	34.47	%	3.2	g/dL	NULL	NULL	NULL	NULL	142	mEq/L	3.65	mEq/L	8.2	mg/dL	109.5	mEq/L	101.5	mg/dL	5.5	%	14	mEq/L	7.38	units	36.75	mm Hg
12370637	67	M	WHITE	102	173	Medicare	English	WIDOWED	CVICU	9.63	K/uL	3.1	m/uL	4.81	K/uL	1.37	K/uL	163.33	K/uL	9.33	g/dL	12.4	%	28.33	%	NULL	NULL	NULL	NULL	NULL	NULL	136	mEq/L	4.2	mEq/L	NULL	NULL	105	mEq/L	107	mg/dL	NULL	NULL	10.5	mEq/L	7.37	units	47	mm Hg
12378873	91	F	WHITE	76.2	NULL	Medicare	English	WIDOWED	MICU/SICU	17.7	K/uL	3.87	m/uL	NULL	NULL	NULL	NULL	184	K/uL	12.2	g/dL	14	%	36.3	%	3.1	g/dL	NULL	NULL	NULL	NULL	137	mEq/L	4	mEq/L	8.8	mg/dL	98	mEq/L	136	mg/dL	NULL	NULL	18	mEq/L	NULL	NULL	NULL	NULL
12384240	95	F	WHITE	46.5	160	Medicare	English	MARRIED	TSICU	13.15	K/uL	3.06	m/uL	NULL	NULL	NULL	NULL	307	K/uL	8.75	g/dL	14.4	%	26.4	%	NULL	NULL	NULL	NULL	NULL	NULL	137	mEq/L	4.9	mEq/L	8.6	mg/dL	99	mEq/L	141	mg/dL	NULL	NULL	12	mEq/L	7.38	units	47	mm Hg
12391254	63	M	WHITE	61.9	NULL	Medicaid	English	SINGLE	MICU/SICU	14.5	K/uL	4.67	m/uL	NULL	NULL	NULL	NULL	337	K/uL	13.6	g/dL	14.8	%	41	%	NULL	NULL	NULL	NULL	NULL	NULL	144	mEq/L	4.6	mEq/L	9.8	mg/dL	102.67	mEq/L	176	mg/dL	NULL	NULL	18.33	mEq/L	NULL	NULL	NULL	NULL
12401826	76	M	WHITE	84.6	185	Medicare	English	MARRIED	MICU	10.5	K/uL	3.31	m/uL	NULL	NULL	NULL	NULL	281	K/uL	9.1	g/dL	14.5	%	27.2	%	3.1	g/dL	NULL	NULL	NULL	NULL	132	mEq/L	5.3	mEq/L	8.6	mg/dL	99	mEq/L	115	mg/dL	NULL	NULL	14	mEq/L	7.41	units	34	mm Hg
12404639	72	M	WHITE - OTHER EUROPEAN	112.5	173	Medicare	English	MARRIED	MICU/SICU	51.35	K/uL	3.15	m/uL	39.54	K/uL	3.23	K/uL	402.67	K/uL	9.75	g/dL	17.53	%	30.07	%	3.1	g/dL	NULL	NULL	NULL	NULL	135.5	mEq/L	5.28	mEq/L	8.8	mg/dL	95.83	mEq/L	129.33	mg/dL	NULL	NULL	27.67	mEq/L	7.18	units	37.17	mm Hg
12405469	68	M	UNABLE TO OBTAIN	75.7	180	Medicare	English	NULL	Neuro Intermediate	11.7	K/uL	2.9	m/uL	9.02	K/uL	1.21	K/uL	285	K/uL	8.9	g/dL	14.8	%	27.1	%	2.2	g/dL	NULL	NULL	NULL	NULL	130.4	mEq/L	4.25	mEq/L	8.05	mg/dL	96.5	mEq/L	106.75	mg/dL	NULL	NULL	9.25	mEq/L	7.38	units	40	mm Hg
12408912	80	M	BLACK/AFRICAN AMERICAN	56.6	165	Medicare	English	SINGLE	MICU/SICU	15.05	K/uL	3.4	m/uL	14.45	K/uL	0.78	K/uL	453.5	K/uL	7.25	g/dL	20.4	%	23.85	%	NULL	NULL	NULL	NULL	NULL	NULL	139	mEq/L	4.3	mEq/L	7.95	mg/dL	105.5	mEq/L	175	mg/dL	NULL	NULL	12	mEq/L	7.34	units	49	mm Hg
12409604	91	M	WHITE	47.5	NULL	Medicare	English	MARRIED	Neuro SICU	9	K/uL	3.41	m/uL	NULL	NULL	NULL	NULL	126	K/uL	9.9	g/dL	15.4	%	31.4	%	4	g/dL	NULL	NULL	NULL	NULL	138	mEq/L	4.6	mEq/L	8.4	mg/dL	98	mEq/L	60	mg/dL	NULL	NULL	20	mEq/L	7.4	units	44	mm Hg
12410014	69	F	WHITE	59	NULL	Medicare	English	MARRIED	Neuro Intermediate	3.8	K/uL	4.11	m/uL	NULL	NULL	NULL	NULL	127	K/uL	11.5	g/dL	16.3	%	35.9	%	NULL	NULL	NULL	NULL	NULL	NULL	138	mEq/L	4.6	mEq/L	8.7	mg/dL	105	mEq/L	95	mg/dL	NULL	NULL	11	mEq/L	NULL	NULL	NULL	NULL
12415372	81	M	WHITE	80.7	178	Medicare	English	MARRIED	MICU/SICU	16.15	K/uL	3.4	m/uL	9.02	K/uL	1.88	K/uL	196.5	K/uL	9.9	g/dL	13.3	%	31.25	%	NULL	NULL	NULL	NULL	NULL	NULL	138	mEq/L	3.85	mEq/L	8.05	mg/dL	103.5	mEq/L	111	mg/dL	NULL	NULL	14.5	mEq/L	NULL	NULL	NULL	NULL
12420873	50	M	BLACK/AFRICAN AMERICAN	73.7	173	NULL	English	SINGLE	MICU	11.5	K/uL	3.16	m/uL	NULL	NULL	NULL	NULL	147.5	K/uL	10.5	g/dL	14.45	%	30.7	%	NULL	NULL	NULL	NULL	NULL	NULL	139.67	mEq/L	4.57	mEq/L	9.33	mg/dL	100.33	mEq/L	112	mg/dL	NULL	NULL	16.67	mEq/L	7.5	units	34	mm Hg
12421828	73	M	WHITE	90	NULL	Medicare	English	MARRIED	SICU	12.57	K/uL	4.48	m/uL	11.13	K/uL	1.34	K/uL	142	K/uL	14.33	g/dL	12.17	%	43.77	%	4.2	g/dL	NULL	NULL	NULL	NULL	141.75	mEq/L	4.33	mEq/L	8.8	mg/dL	102	mEq/L	162	mg/dL	5.7	%	17.5	mEq/L	7.42	units	34.5	mm Hg
12430823	81	M	WHITE	84.25	178	Medicare	English	MARRIED	MICU/SICU	8.85	K/uL	3.81	m/uL	NULL	NULL	NULL	NULL	188.5	K/uL	10.6	g/dL	15.75	%	33.05	%	NULL	NULL	NULL	NULL	NULL	NULL	139	mEq/L	4	mEq/L	8.1	mg/dL	104	mEq/L	78.5	mg/dL	NULL	NULL	13	mEq/L	NULL	NULL	NULL	NULL
12431260	69	M	WHITE	89.1667	175	Medicare	English	SINGLE	TSICU	6.1	K/uL	4.36	m/uL	5.66	K/uL	0.21	K/uL	145	K/uL	12	g/dL	13.25	%	36.45	%	NULL	NULL	NULL	NULL	NULL	NULL	138	mEq/L	4.65	mEq/L	8.9	mg/dL	108.5	mEq/L	161	mg/dL	NULL	NULL	12	mEq/L	7.29	units	44.2	mm Hg
12435232	74	M	WHITE	77	NULL	Medicare	English	SINGLE	CCU	9.75	K/uL	3.8	m/uL	4.43	K/uL	1.18	K/uL	229.25	K/uL	13.03	g/dL	17.5	%	41.05	%	NULL	NULL	NULL	NULL	NULL	NULL	141.67	mEq/L	3.93	mEq/L	8.83	mg/dL	101	mEq/L	121.67	mg/dL	NULL	NULL	14.33	mEq/L	7.34	units	47	mm Hg
12445259	75	M	WHITE	85	NULL	Private	English	MARRIED	MICU/SICU	1.8	K/uL	2.6	m/uL	1.28	K/uL	0.14	K/uL	12.33	K/uL	7.72	g/dL	19.53	%	23.63	%	2.3	g/dL	NULL	NULL	NULL	NULL	138.67	mEq/L	4.8	mEq/L	7.83	mg/dL	102.33	mEq/L	114	mg/dL	NULL	NULL	17	mEq/L	7.37	units	36	mm Hg
12447167	59	F	WHITE	53.7	157	Medicaid	English	DIVORCED	Neuro Intermediate	5.5	K/uL	3.5	m/uL	NULL	NULL	NULL	NULL	266	K/uL	10.9	g/dL	13.3	%	35.1	%	NULL	NULL	NULL	NULL	NULL	NULL	143	mEq/L	4.6	mEq/L	8.6	mg/dL	106	mEq/L	113	mg/dL	NULL	NULL	11	mEq/L	7.31	units	53	mm Hg
12457519	85	M	WHITE	98.4	NULL	Medicare	English	MARRIED	MICU	10.15	K/uL	2.67	m/uL	NULL	NULL	NULL	NULL	189.5	K/uL	8.5	g/dL	16.7	%	27.9	%	NULL	NULL	NULL	NULL	NULL	NULL	139	mEq/L	4.55	mEq/L	8.35	mg/dL	99.5	mEq/L	142.5	mg/dL	NULL	NULL	17.5	mEq/L	7.35	units	56	mm Hg
12458552	77	M	WHITE	73.9	NULL	Medicare	English	WIDOWED	Neuro SICU	19.33	K/uL	4	m/uL	NULL	NULL	NULL	NULL	155	K/uL	11.77	g/dL	13.9	%	37.1	%	NULL	NULL	NULL	NULL	NULL	NULL	137.33	mEq/L	3.77	mEq/L	7.55	mg/dL	103	mEq/L	94.33	mg/dL	NULL	NULL	13.67	mEq/L	7.34	units	42	mm Hg
12458662	63	M	BLACK/AFRICAN AMERICAN	78.1	NULL	Medicaid	English	SINGLE	Neuro SICU	9.77	K/uL	3.88	m/uL	NULL	NULL	NULL	NULL	340.33	K/uL	11.07	g/dL	15.13	%	34.53	%	NULL	NULL	NULL	NULL	NULL	NULL	136	mEq/L	4.55	mEq/L	9.45	mg/dL	97.5	mEq/L	120.6	mg/dL	NULL	NULL	16	mEq/L	7.44	units	40	mm Hg
12460668	65	M	WHITE	114.1	178	Medicare	English	MARRIED	CCU	13.63	K/uL	3.88	m/uL	12.51	K/uL	0.27	K/uL	134.67	K/uL	11.57	g/dL	15.93	%	36.53	%	3.5	g/dL	NULL	NULL	NULL	NULL	142	mEq/L	3.95	mEq/L	6.78	mg/dL	111.5	mEq/L	151.25	mg/dL	NULL	NULL	12.75	mEq/L	7.25	units	44.43	mm Hg
12468016	62	M	WHITE	111.167	178	Medicare	English	MARRIED	CVICU	28.35	K/uL	3.32	m/uL	26.77	K/uL	0.47	K/uL	426.5	K/uL	9.3	g/dL	17.25	%	27.55	%	2.8	g/dL	NULL	NULL	NULL	NULL	133	mEq/L	3.63	mEq/L	7.47	mg/dL	94.67	mEq/L	119.25	mg/dL	NULL	NULL	22.33	mEq/L	7.32	units	40.5	mm Hg
12476539	93	M	WHITE	57.8	173	Medicare	English	WIDOWED	CCU	26.5	K/uL	3.24	m/uL	NULL	NULL	NULL	NULL	246	K/uL	10.3	g/dL	13	%	32.8	%	NULL	NULL	NULL	NULL	NULL	NULL	140	mEq/L	4.7	mEq/L	8.5	mg/dL	102	mEq/L	82	mg/dL	NULL	NULL	21	mEq/L	7.32	units	42.67	mm Hg
12477763	84	F	WHITE	67.8	NULL	Medicare	English	MARRIED	MICU	6.15	K/uL	2.55	m/uL	3.74	K/uL	1.03	K/uL	123	K/uL	7.25	g/dL	15.48	%	23.48	%	NULL	NULL	NULL	NULL	NULL	NULL	144.5	mEq/L	3.85	mEq/L	7.6	mg/dL	112.5	mEq/L	97.5	mg/dL	NULL	NULL	11	mEq/L	NULL	NULL	NULL	NULL
12478513	58	F	UNKNOWN	50	163	Medicaid	NULL	NULL	MICU	20.3	K/uL	3.16	m/uL	NULL	NULL	NULL	NULL	282.5	K/uL	9.2	g/dL	18.3	%	29.95	%	2.3	g/dL	NULL	NULL	NULL	NULL	135.5	mEq/L	5.2	mEq/L	7.6	mg/dL	98.5	mEq/L	65.5	mg/dL	NULL	NULL	19.5	mEq/L	7.42	units	49	mm Hg
12482346	85	F	UNKNOWN	57.8	152	NULL	English	NULL	SICU	16.28	K/uL	4.82	m/uL	20.2	K/uL	0.68	K/uL	82.6	K/uL	14.36	g/dL	15.22	%	42	%	NULL	NULL	NULL	NULL	NULL	NULL	147	mEq/L	3.63	mEq/L	8.4	mg/dL	117.75	mEq/L	71.25	mg/dL	NULL	NULL	12.5	mEq/L	7.29	units	38.4	mm Hg
12486192	64	M	WHITE	71.4	NULL	Medicare	English	SINGLE	Neuro Intermediate	NULL	NULL	NULL	NULL	NULL	NULL	NULL	NULL	NULL	NULL	NULL	NULL	NULL	NULL	NULL	NULL	NULL	NULL	NULL	NULL	NULL	NULL	NULL	NULL	NULL	NULL	NULL	NULL	NULL	NULL	NULL	NULL	NULL	NULL	NULL	NULL	NULL	NULL	NULL	NULL
12486272	58	F	WHITE	80.5	NULL	Medicare	English	MARRIED	MICU	12.25	K/uL	2.83	m/uL	11.23	K/uL	0.62	K/uL	237.5	K/uL	7.25	g/dL	16.3	%	24	%	NULL	NULL	NULL	NULL	NULL	NULL	140.5	mEq/L	3.7	mEq/L	8.5	mg/dL	100	mEq/L	113.5	mg/dL	NULL	NULL	14.5	mEq/L	7.4	units	48	mm Hg
12488949	76	F	WHITE	74.4	NULL	Medicare	English	DIVORCED	MICU/SICU	7.4	K/uL	3.81	m/uL	NULL	NULL	NULL	NULL	189	K/uL	10.9	g/dL	15.9	%	34.2	%	NULL	NULL	NULL	NULL	NULL	NULL	138	mEq/L	4	mEq/L	8.5	mg/dL	103	mEq/L	292	mg/dL	NULL	NULL	16	mEq/L	NULL	NULL	NULL	NULL
12491283	55	M	WHITE	109.1	173	Medicaid	English	MARRIED	TSICU	12.25	K/uL	2.67	m/uL	NULL	NULL	NULL	NULL	600.5	K/uL	7.3	g/dL	16.6	%	23.75	%	NULL	NULL	NULL	NULL	NULL	NULL	144.5	mEq/L	5.05	mEq/L	7.55	mg/dL	108	mEq/L	130	mg/dL	NULL	NULL	9	mEq/L	7.41	units	49	mm Hg
12506247	74	M	WHITE	114.033	NULL	Medicare	English	MARRIED	SICU	14.65	K/uL	3.5	m/uL	NULL	NULL	NULL	NULL	217	K/uL	10.5	g/dL	14.55	%	32.35	%	NULL	NULL	NULL	NULL	NULL	NULL	141	mEq/L	3.66	mEq/L	8.04	mg/dL	103.2	mEq/L	122.2	mg/dL	NULL	NULL	15.6	mEq/L	7.34	units	47.5	mm Hg
12513442	69	M	WHITE	98	183	Medicare	English	SINGLE	Neuro Intermediate	12	K/uL	3.2	m/uL	NULL	NULL	NULL	NULL	152	K/uL	9.65	g/dL	13.05	%	32.65	%	NULL	NULL	NULL	NULL	NULL	NULL	140.33	mEq/L	4.3	mEq/L	8.6	mg/dL	102	mEq/L	170.5	mg/dL	NULL	NULL	13	mEq/L	NULL	NULL	NULL	NULL
12513536	75	M	WHITE	62.3	NULL	Medicare	English	DIVORCED	CCU	13.1	K/uL	3.65	m/uL	11.74	K/uL	0.32	K/uL	264	K/uL	12.7	g/dL	13.4	%	37.8	%	3.1	g/dL	NULL	NULL	NULL	NULL	141.33	mEq/L	5.27	mEq/L	8.35	mg/dL	105.33	mEq/L	125	mg/dL	5.6	%	15.33	mEq/L	7.33	units	51	mm Hg
12514721	85	F	BLACK/AFRICAN AMERICAN	36	NULL	Medicare	English	WIDOWED	MICU	11	K/uL	3.73	m/uL	10.25	K/uL	0.43	K/uL	159.5	K/uL	9.55	g/dL	19.35	%	33.4	%	NULL	NULL	NULL	NULL	NULL	NULL	143	mEq/L	5	mEq/L	9.65	mg/dL	98.5	mEq/L	182	mg/dL	NULL	NULL	10.5	mEq/L	7.24	units	82	mm Hg
12518169	51	M	WHITE	84	NULL	Private	English	NULL	SICU	10.75	K/uL	2.5	m/uL	NULL	NULL	NULL	NULL	98.67	K/uL	6	g/dL	21.52	%	20.25	%	2.9	g/dL	NULL	NULL	NULL	NULL	131.5	mEq/L	4.9	mEq/L	7.55	mg/dL	104	mEq/L	104.5	mg/dL	NULL	NULL	11	mEq/L	7.32	units	38.67	mm Hg
12519724	86	F	WHITE	64.1	NULL	Medicare	Italian	WIDOWED	MICU	NULL	NULL	NULL	NULL	NULL	NULL	NULL	NULL	NULL	NULL	NULL	NULL	NULL	NULL	NULL	NULL	NULL	NULL	NULL	NULL	NULL	NULL	137	mEq/L	3.9	mEq/L	8.6	mg/dL	93	mEq/L	309	mg/dL	NULL	NULL	18	mEq/L	7.35	units	51	mm Hg
12526259	91	F	WHITE	53.8	NULL	Medicare	English	WIDOWED	TSICU	10.05	K/uL	3.3	m/uL	9.3	K/uL	1.65	K/uL	194	K/uL	9.2	g/dL	16.05	%	29.82	%	NULL	NULL	NULL	NULL	NULL	NULL	139	mEq/L	4.85	mEq/L	8	mg/dL	104.5	mEq/L	116.5	mg/dL	NULL	NULL	14.5	mEq/L	NULL	NULL	NULL	NULL
12526600	71	F	WHITE	66	NULL	Medicaid	English	SINGLE	MICU/SICU	5.95	K/uL	2.31	m/uL	NULL	NULL	NULL	NULL	106	K/uL	7.4	g/dL	20.2	%	21.75	%	NULL	NULL	NULL	NULL	NULL	NULL	129	mEq/L	3.8	mEq/L	6.3	mg/dL	89	mEq/L	183	mg/dL	NULL	NULL	14	mEq/L	7.33	units	59	mm Hg
12527525	76	M	WHITE	69.75	NULL	Medicare	English	MARRIED	TSICU	15.55	K/uL	3.62	m/uL	NULL	NULL	NULL	NULL	253.5	K/uL	9.4	g/dL	17.05	%	30.25	%	NULL	NULL	NULL	NULL	NULL	NULL	145.5	mEq/L	3.5	mEq/L	8.2	mg/dL	110.5	mEq/L	141	mg/dL	NULL	NULL	12	mEq/L	NULL	NULL	NULL	NULL
12528229	83	F	WHITE	56	160	Medicare	English	WIDOWED	CCU	21.78	K/uL	3.39	m/uL	22.5	K/uL	2.44	K/uL	384	K/uL	10.43	g/dL	14.9	%	32.48	%	NULL	NULL	NULL	NULL	NULL	NULL	141.5	mEq/L	4.35	mEq/L	8.2	mg/dL	108	mEq/L	208.5	mg/dL	5.3	%	14.5	mEq/L	7.32	units	35.5	mm Hg
12533521	76	M	WHITE	72.3	173	Medicare	English	MARRIED	Neuro Stepdown	14.2	K/uL	5.07	m/uL	NULL	NULL	NULL	NULL	225	K/uL	15.8	g/dL	13.2	%	44	%	NULL	NULL	NULL	NULL	NULL	NULL	NULL	NULL	NULL	NULL	NULL	NULL	NULL	NULL	NULL	NULL	NULL	NULL	NULL	NULL	NULL	NULL	NULL	NULL
12545949	74	M	WHITE	84	178	Medicare	English	DIVORCED	TSICU	22.17	K/uL	3.23	m/uL	NULL	NULL	NULL	NULL	262	K/uL	8.87	g/dL	13.93	%	28.73	%	NULL	NULL	NULL	NULL	NULL	NULL	125.5	mEq/L	4.85	mEq/L	7.75	mg/dL	90	mEq/L	355.5	mg/dL	NULL	NULL	13.5	mEq/L	7.34	units	59.5	mm Hg
12548481	66	M	WHITE	57.4	NULL	Medicare	English	SINGLE	MICU	6.4	K/uL	3.29	m/uL	NULL	NULL	NULL	NULL	219	K/uL	8.6	g/dL	18.4	%	25.1	%	NULL	NULL	NULL	NULL	NULL	NULL	112	mEq/L	4.1	mEq/L	8.7	mg/dL	78	mEq/L	116	mg/dL	NULL	NULL	12	mEq/L	NULL	NULL	NULL	NULL
12549219	70	F	OTHER	58.8	NULL	Medicare	English	WIDOWED	MICU	12.96	K/uL	2.56	m/uL	8.69	K/uL	2.01	K/uL	245.4	K/uL	8.6	g/dL	13.56	%	26.02	%	NULL	NULL	NULL	NULL	NULL	NULL	128.71	mEq/L	4.21	mEq/L	9.4	mg/dL	94.57	mEq/L	119.86	mg/dL	NULL	NULL	16.29	mEq/L	NULL	NULL	NULL	NULL
12553113	55	F	WHITE	106.6	165	Medicare	English	MARRIED	MICU	9.76	K/uL	3.15	m/uL	6.04	K/uL	0.72	K/uL	84.4	K/uL	10.1	g/dL	15.76	%	30.84	%	NULL	NULL	NULL	NULL	NULL	NULL	143.67	mEq/L	4.27	mEq/L	8.4	mg/dL	104.33	mEq/L	142	mg/dL	NULL	NULL	18.33	mEq/L	7.45	units	42	mm Hg
12553696	60	M	WHITE	103	170	Private	English	MARRIED	CCU	14.1	K/uL	5.2	m/uL	12.4	K/uL	0.87	K/uL	256	K/uL	16.15	g/dL	13.35	%	48.65	%	NULL	NULL	NULL	NULL	NULL	NULL	142	mEq/L	4.33	mEq/L	7.93	mg/dL	104.67	mEq/L	120	mg/dL	NULL	NULL	17	mEq/L	7.38	units	44.1	mm Hg
12556199	70	M	WHITE	75	NULL	Medicare	English	MARRIED	MICU/SICU	7.5	K/uL	5.39	m/uL	6.93	K/uL	0.39	K/uL	109	K/uL	16.1	g/dL	14.15	%	47.15	%	NULL	NULL	NULL	NULL	NULL	NULL	130.33	mEq/L	3.97	mEq/L	7.9	mg/dL	97.67	mEq/L	113.67	mg/dL	NULL	NULL	16.33	mEq/L	7.42	units	31	mm Hg
12557389	81	F	WHITE	62.2	NULL	Medicare	English	WIDOWED	Neuro Intermediate	8.2	K/uL	4.04	m/uL	NULL	NULL	NULL	NULL	236	K/uL	11.9	g/dL	13.5	%	36.5	%	NULL	NULL	NULL	NULL	NULL	NULL	139	mEq/L	4.3	mEq/L	10.2	mg/dL	103	mEq/L	98	mg/dL	NULL	NULL	9	mEq/L	NULL	NULL	NULL	NULL
12559395	77	F	WHITE	46.6	NULL	Medicare	English	WIDOWED	MICU	7.9	K/uL	2.9	m/uL	NULL	NULL	NULL	NULL	367	K/uL	9.2	g/dL	16.9	%	30.6	%	NULL	NULL	NULL	NULL	NULL	NULL	129	mEq/L	5.2	mEq/L	6.6	mg/dL	101	mEq/L	198	mg/dL	NULL	NULL	19	mEq/L	7.26	units	28.75	mm Hg
12561557	70	M	WHITE	71.2	173	Medicare	English	WIDOWED	CVICU	13.84	K/uL	2.71	m/uL	11.52	K/uL	2.33	K/uL	110.8	K/uL	8.24	g/dL	14.24	%	25.3	%	NULL	NULL	NULL	NULL	NULL	NULL	139	mEq/L	4.6	mEq/L	7.3	mg/dL	111	mEq/L	111	mg/dL	NULL	NULL	8.5	mEq/L	7.35	units	42.82	mm Hg
12563517	76	F	BLACK/AFRICAN AMERICAN	110	157	Medicare	English	MARRIED	CVICU	10.33	K/uL	3.37	m/uL	7.5	K/uL	2	K/uL	128.33	K/uL	9.03	g/dL	13.73	%	28.18	%	NULL	NULL	NULL	NULL	NULL	NULL	141	mEq/L	4.8	mEq/L	8.3	mg/dL	112.5	mEq/L	113	mg/dL	NULL	NULL	11	mEq/L	7.37	units	34.78	mm Hg
12563738	77	M	WHITE - OTHER EUROPEAN	85.2	NULL	Medicare	English	MARRIED	SICU	11.3	K/uL	3.72	m/uL	7.93	K/uL	1.58	K/uL	153	K/uL	10.4	g/dL	13.8	%	30.1	%	NULL	NULL	NULL	NULL	5.4	g/dL	129.33	mEq/L	5.47	mEq/L	8.07	mg/dL	90	mEq/L	118.67	mg/dL	NULL	NULL	22.67	mEq/L	7.42	units	25	mm Hg
12565265	67	M	UNKNOWN	89	NULL	Other	English	MARRIED	Neuro Intermediate	9	K/uL	5.02	m/uL	NULL	NULL	NULL	NULL	217	K/uL	15.1	g/dL	12.5	%	45.7	%	NULL	NULL	NULL	NULL	NULL	NULL	138	mEq/L	4.2	mEq/L	8.7	mg/dL	104	mEq/L	117	mg/dL	5.6	%	10	mEq/L	NULL	NULL	NULL	NULL
12572534	72	F	WHITE	93	170	Medicare	English	SINGLE	MICU	11.5	K/uL	3.67	m/uL	NULL	NULL	NULL	NULL	191	K/uL	10	g/dL	15.9	%	31	%	NULL	NULL	NULL	NULL	NULL	NULL	133	mEq/L	3.65	mEq/L	8.9	mg/dL	90.5	mEq/L	176	mg/dL	NULL	NULL	13.5	mEq/L	7.49	units	40	mm Hg
12574098	53	F	BLACK/AFRICAN AMERICAN	42.9	NULL	Medicaid	English	SINGLE	MICU/SICU	11.4	K/uL	4.34	m/uL	10.12	K/uL	0.53	K/uL	480	K/uL	12.3	g/dL	16.1	%	40.5	%	NULL	NULL	NULL	NULL	NULL	NULL	141	mEq/L	4.6	mEq/L	9.4	mg/dL	95	mEq/L	218	mg/dL	NULL	NULL	8	mEq/L	7.34	units	77.33	mm Hg
12578079	80	F	WHITE	68	165	Medicare	English	WIDOWED	MICU/SICU	4.9	K/uL	3.84	m/uL	NULL	NULL	NULL	NULL	257	K/uL	11.1	g/dL	13.4	%	32.3	%	3.7	g/dL	NULL	NULL	NULL	NULL	134	mEq/L	4	mEq/L	8.8	mg/dL	98	mEq/L	135	mg/dL	NULL	NULL	12	mEq/L	7.38	units	45.5	mm Hg
12579086	80	F	WHITE	44.9	155	Medicare	English	WIDOWED	MICU/SICU	13.7	K/uL	2.59	m/uL	12.84	K/uL	0.44	K/uL	204	K/uL	8	g/dL	15.1	%	25	%	3.5	g/dL	NULL	NULL	NULL	NULL	139.5	mEq/L	4.23	mEq/L	10.15	mg/dL	95	mEq/L	132	mg/dL	NULL	NULL	26.75	mEq/L	7.34	units	42.75	mm Hg
12582857	70	M	WHITE	79.8	175	Medicare	English	DIVORCED	CVICU	13.2	K/uL	4.05	m/uL	NULL	NULL	NULL	NULL	106.5	K/uL	12.3	g/dL	14.75	%	37.15	%	NULL	NULL	NULL	NULL	NULL	NULL	140.5	mEq/L	4.7	mEq/L	7.95	mg/dL	111.5	mEq/L	172.5	mg/dL	NULL	NULL	14.5	mEq/L	7.26	units	44.91	mm Hg
12583923	82	M	WHITE	64	170	Medicare	English	MARRIED	MICU	31.3	K/uL	3.82	m/uL	NULL	NULL	NULL	NULL	161	K/uL	11.5	g/dL	16.1	%	38.1	%	NULL	NULL	NULL	NULL	NULL	NULL	133	mEq/L	4	mEq/L	9.2	mg/dL	92	mEq/L	271	mg/dL	NULL	NULL	24	mEq/L	7.17	units	53	mm Hg
12594149	86	M	UNKNOWN	80.9	178	Medicare	English	MARRIED	MICU/SICU	14	K/uL	2.87	m/uL	NULL	NULL	NULL	NULL	181	K/uL	8	g/dL	16.4	%	26.7	%	2.4	g/dL	NULL	NULL	6.6	g/dL	146	mEq/L	3.5	mEq/L	10.1	mg/dL	115	mEq/L	109	mg/dL	NULL	NULL	9	mEq/L	7.37	units	38.67	mm Hg
12594476	81	M	WHITE	55.9	174	Medicare	English	MARRIED	MICU	8.7	K/uL	3.64	m/uL	NULL	NULL	NULL	NULL	122.5	K/uL	11.2	g/dL	16.5	%	35.5	%	NULL	NULL	NULL	NULL	NULL	NULL	142.33	mEq/L	3.7	mEq/L	8.83	mg/dL	101.33	mEq/L	147.33	mg/dL	NULL	NULL	15.33	mEq/L	7.26	units	62	mm Hg
12594593	70	M	WHITE	102	178	Medicare	English	MARRIED	CVICU	11.05	K/uL	4.37	m/uL	7.5	K/uL	1.36	K/uL	389	K/uL	13.25	g/dL	13.35	%	41.45	%	3.4	g/dL	NULL	NULL	NULL	NULL	137	mEq/L	4.25	mEq/L	8.7	mg/dL	100	mEq/L	104	mg/dL	NULL	NULL	11	mEq/L	7.34	units	52	mm Hg
12598886	54	M	UNKNOWN	85.75	188	Private	English	NULL	CVICU	26.45	K/uL	4.45	m/uL	25.56	K/uL	1.87	K/uL	190.5	K/uL	12.2	g/dL	13.75	%	36.46	%	NULL	NULL	NULL	NULL	NULL	NULL	139	mEq/L	4.4	mEq/L	NULL	NULL	109.5	mEq/L	95	mg/dL	NULL	NULL	9.5	mEq/L	7.34	units	41.45	mm Hg
12600095	80	M	WHITE	167.45	193	Medicare	English	WIDOWED	MICU	8.67	K/uL	3.12	m/uL	NULL	NULL	NULL	NULL	145	K/uL	11.07	g/dL	15.3	%	32.87	%	NULL	NULL	NULL	NULL	NULL	NULL	135	mEq/L	4.25	mEq/L	8.2	mg/dL	96.5	mEq/L	95.5	mg/dL	NULL	NULL	14	mEq/L	7.35	units	47.89	mm Hg
12606113	73	M	WHITE - RUSSIAN	85	NULL	Medicare	Russian	MARRIED	SICU	10.35	K/uL	2.42	m/uL	4.71	K/uL	4.79	K/uL	109	K/uL	8.05	g/dL	14	%	25.9	%	NULL	NULL	NULL	NULL	NULL	NULL	149.5	mEq/L	4.2	mEq/L	12.75	mg/dL	108	mEq/L	325.5	mg/dL	NULL	NULL	23	mEq/L	7	units	96	mm Hg
12606407	83	M	WHITE	74	NULL	Other	English	WIDOWED	CCU	10.5	K/uL	3.56	m/uL	NULL	NULL	NULL	NULL	185	K/uL	11	g/dL	15.6	%	33.9	%	NULL	NULL	NULL	NULL	NULL	NULL	136	mEq/L	5	mEq/L	8.4	mg/dL	102	mEq/L	112	mg/dL	NULL	NULL	20	mEq/L	NULL	NULL	NULL	NULL
12606933	83	M	WHITE	65	NULL	Medicare	English	MARRIED	Neuro Intermediate	11.2	K/uL	4.26	m/uL	NULL	NULL	NULL	NULL	209	K/uL	13	g/dL	12.7	%	38.5	%	NULL	NULL	NULL	NULL	NULL	NULL	139	mEq/L	3.9	mEq/L	9.3	mg/dL	103	mEq/L	116	mg/dL	5.8	%	14	mEq/L	NULL	NULL	NULL	NULL
12614332	77	M	WHITE - OTHER EUROPEAN	79.35	183	Medicare	English	WIDOWED	CVICU	8.1	K/uL	3.15	m/uL	NULL	NULL	NULL	NULL	142	K/uL	10.6	g/dL	13.2	%	32.3	%	NULL	NULL	NULL	NULL	NULL	NULL	136	mEq/L	4.4	mEq/L	7.9	mg/dL	105	mEq/L	109	mg/dL	NULL	NULL	9	mEq/L	7.41	units	38	mm Hg
12615299	63	F	WHITE	91.5	160	Medicaid	English	DIVORCED	MICU	11.5	K/uL	2.79	m/uL	11.53	K/uL	0.47	K/uL	420	K/uL	8.5	g/dL	13.15	%	26.35	%	2.9	g/dL	NULL	NULL	NULL	NULL	141.67	mEq/L	3.43	mEq/L	8.43	mg/dL	102.33	mEq/L	139	mg/dL	NULL	NULL	13	mEq/L	7.45	units	42.33	mm Hg
12618115	81	F	WHITE	65.4	NULL	Medicare	English	MARRIED	MICU	6.3	K/uL	3.97	m/uL	NULL	NULL	NULL	NULL	270	K/uL	12.1	g/dL	14.1	%	36.5	%	4.2	g/dL	NULL	NULL	NULL	NULL	128	mEq/L	4.5	mEq/L	10.8	mg/dL	89	mEq/L	193	mg/dL	NULL	NULL	16	mEq/L	NULL	NULL	NULL	NULL
12623938	80	M	UNKNOWN	67	NULL	Medicare	English	NULL	Neuro Intermediate	13.25	K/uL	3.96	m/uL	NULL	NULL	NULL	NULL	340	K/uL	11.45	g/dL	14.5	%	35.65	%	NULL	NULL	NULL	NULL	NULL	NULL	136.5	mEq/L	5.05	mEq/L	8.35	mg/dL	101.5	mEq/L	135.5	mg/dL	6.2	%	11	mEq/L	NULL	NULL	NULL	NULL
12624234	64	F	UNKNOWN	77.8	157	Medicare	English	NULL	MICU/SICU	4.15	K/uL	2.57	m/uL	NULL	NULL	NULL	NULL	216.5	K/uL	8.65	g/dL	19.2	%	27.45	%	NULL	NULL	NULL	NULL	NULL	NULL	142	mEq/L	4	mEq/L	7.1	mg/dL	107.5	mEq/L	78	mg/dL	NULL	NULL	12.5	mEq/L	NULL	NULL	NULL	NULL
12625353	64	M	UNKNOWN	123.2	NULL	Private	English	NULL	SICU	8.5	K/uL	4.09	m/uL	NULL	NULL	NULL	NULL	168	K/uL	12.65	g/dL	13.25	%	37.85	%	NULL	NULL	NULL	NULL	NULL	NULL	135.5	mEq/L	3.6	mEq/L	8.3	mg/dL	97.5	mEq/L	120.5	mg/dL	5.7	%	15.5	mEq/L	NULL	NULL	NULL	NULL
12629682	89	F	WHITE - RUSSIAN	53.1	NULL	Medicare	Russian	SINGLE	MICU/SICU	10.4	K/uL	3.94	m/uL	NULL	NULL	NULL	NULL	302.67	K/uL	9.37	g/dL	16.97	%	31.4	%	NULL	NULL	NULL	NULL	NULL	NULL	136.33	mEq/L	4.3	mEq/L	8.17	mg/dL	105	mEq/L	179	mg/dL	NULL	NULL	9.67	mEq/L	NULL	NULL	NULL	NULL
12630464	64	F	WHITE	98.2	160	Medicaid	English	DIVORCED	SICU	17.4	K/uL	3.95	m/uL	14.41	K/uL	0.66	K/uL	242	K/uL	11.43	g/dL	14.6	%	35.63	%	NULL	NULL	NULL	NULL	NULL	NULL	137.67	mEq/L	4.5	mEq/L	8.45	mg/dL	99.33	mEq/L	134	mg/dL	NULL	NULL	13	mEq/L	7.37	units	48.71	mm Hg
12631015	87	M	WHITE	60.8	170	Medicare	English	DIVORCED	CCU	23.13	K/uL	3.5	m/uL	NULL	NULL	NULL	NULL	425.67	K/uL	10.3	g/dL	13.37	%	32.5	%	NULL	NULL	NULL	NULL	NULL	NULL	128.4	mEq/L	5.6	mEq/L	8.13	mg/dL	93.6	mEq/L	154.6	mg/dL	NULL	NULL	23.6	mEq/L	7.28	units	42.67	mm Hg
12633908	69	F	BLACK/AFRICAN AMERICAN	80	NULL	Medicaid	English	SINGLE	SICU	6.9	K/uL	4.42	m/uL	NULL	NULL	NULL	NULL	274	K/uL	13.2	g/dL	13.8	%	43.3	%	NULL	NULL	NULL	NULL	NULL	NULL	140	mEq/L	3.8	mEq/L	10	mg/dL	105	mEq/L	131	mg/dL	NULL	NULL	8	mEq/L	7.31	units	60	mm Hg
12642829	73	M	WHITE	85.2	163	Medicare	English	MARRIED	CVICU	23.13	K/uL	3.2	m/uL	8.67	K/uL	2.63	K/uL	173	K/uL	10.3	g/dL	16.43	%	31.98	%	NULL	NULL	NULL	NULL	NULL	NULL	140	mEq/L	4.5	mEq/L	NULL	NULL	108.5	mEq/L	123	mg/dL	5.2	%	11	mEq/L	7.39	units	38.17	mm Hg
12643488	88	M	WHITE	88	NULL	Medicare	English	SINGLE	SICU	8.7	K/uL	3.45	m/uL	NULL	NULL	NULL	NULL	184.5	K/uL	11.35	g/dL	14.65	%	34.65	%	NULL	NULL	NULL	NULL	NULL	NULL	137.5	mEq/L	4.95	mEq/L	8.35	mg/dL	101.5	mEq/L	161	mg/dL	NULL	NULL	12	mEq/L	7.35	units	46	mm Hg
12643557	67	M	WHITE	63.1	NULL	Medicare	English	MARRIED	CCU	7.55	K/uL	2.45	m/uL	NULL	NULL	NULL	NULL	113	K/uL	8.35	g/dL	14.5	%	25.25	%	NULL	NULL	NULL	NULL	NULL	NULL	133	mEq/L	4.4	mEq/L	9.1	mg/dL	94	mEq/L	83	mg/dL	NULL	NULL	21	mEq/L	7.42	units	43	mm Hg
12653086	87	M	WHITE	72.1667	180	Medicare	English	MARRIED	TSICU	32.26	K/uL	3.26	m/uL	NULL	NULL	NULL	NULL	350.86	K/uL	8.76	g/dL	15.54	%	28.8	%	NULL	NULL	NULL	NULL	NULL	NULL	141.86	mEq/L	5.4	mEq/L	8.07	mg/dL	106.86	mEq/L	211.5	mg/dL	NULL	NULL	20.43	mEq/L	7.24	units	38.73	mm Hg
12655454	77	M	WHITE	81.1	NULL	Medicare	English	MARRIED	SICU	7.27	K/uL	3.79	m/uL	6.8	K/uL	0.74	K/uL	156.33	K/uL	9.4	g/dL	27.23	%	31.37	%	NULL	NULL	NULL	NULL	NULL	NULL	137	mEq/L	4.13	mEq/L	8.25	mg/dL	101	mEq/L	116.33	mg/dL	NULL	NULL	15	mEq/L	NULL	NULL	NULL	NULL
12656372	65	F	WHITE	76.5	NULL	Medicare	English	SINGLE	SICU	5.4	K/uL	2.82	m/uL	NULL	NULL	NULL	NULL	200	K/uL	8.8	g/dL	13.9	%	26.9	%	NULL	NULL	NULL	NULL	NULL	NULL	146	mEq/L	3.7	mEq/L	8.7	mg/dL	103	mEq/L	121	mg/dL	NULL	NULL	11	mEq/L	7.4	units	51.4	mm Hg
12656773	56	F	BLACK/AFRICAN AMERICAN	107.55	152	Medicaid	English	SINGLE	MICU	3.55	K/uL	3.01	m/uL	2.43	K/uL	0.46	K/uL	64	K/uL	9.55	g/dL	17.5	%	29.85	%	4.3	g/dL	NULL	NULL	NULL	NULL	139.5	mEq/L	4.2	mEq/L	7.85	mg/dL	95.5	mEq/L	135.5	mg/dL	NULL	NULL	17.5	mEq/L	7.35	units	51.4	mm Hg
12661536	81	M	OTHER	55	173	Medicare	English	WIDOWED	TSICU	17.48	K/uL	3.48	m/uL	NULL	NULL	NULL	NULL	186.5	K/uL	12.45	g/dL	15.4	%	37.3	%	2.25	g/dL	NULL	NULL	NULL	NULL	136.5	mEq/L	4.95	mEq/L	7.65	mg/dL	107.75	mEq/L	124.75	mg/dL	NULL	NULL	14.25	mEq/L	7.23	units	40.29	mm Hg
12661774	47	M	WHITE	75.5	NULL	Medicaid	English	SINGLE	MICU	9.7	K/uL	2.22	m/uL	5.9	K/uL	2.14	K/uL	139	K/uL	7.3	g/dL	15.9	%	21.6	%	2.5	g/dL	NULL	NULL	NULL	NULL	134	mEq/L	3.8	mEq/L	8.7	mg/dL	96	mEq/L	88	mg/dL	NULL	NULL	14	mEq/L	NULL	NULL	NULL	NULL
12662841	76	M	WHITE	88	180	Medicare	English	MARRIED	MICU	6.45	K/uL	2.79	m/uL	NULL	NULL	NULL	NULL	114.5	K/uL	8.35	g/dL	19.75	%	26.95	%	NULL	NULL	NULL	NULL	NULL	NULL	131.67	mEq/L	4.27	mEq/L	7.47	mg/dL	102	mEq/L	164	mg/dL	NULL	NULL	11	mEq/L	7.24	units	47.75	mm Hg
12667163	82	F	UNABLE TO OBTAIN	54.4	168	Medicare	English	NULL	TSICU	15.2	K/uL	3.3	m/uL	NULL	NULL	NULL	NULL	175	K/uL	10.7	g/dL	13.2	%	33	%	NULL	NULL	NULL	NULL	NULL	NULL	139	mEq/L	4.9	mEq/L	8.7	mg/dL	102	mEq/L	170	mg/dL	NULL	NULL	16	mEq/L	NULL	NULL	NULL	NULL
12668440	78	F	WHITE	94	NULL	Medicare	English	SINGLE	CCU	5.3	K/uL	4.07	m/uL	NULL	NULL	NULL	NULL	129	K/uL	11.3	g/dL	15.8	%	36.9	%	NULL	NULL	NULL	NULL	NULL	NULL	144.5	mEq/L	4.15	mEq/L	8.3	mg/dL	104.5	mEq/L	132.5	mg/dL	NULL	NULL	13	mEq/L	NULL	NULL	NULL	NULL
12669344	63	M	WHITE	111.1	NULL	Private	English	MARRIED	MICU	20.9	K/uL	4.89	m/uL	17.68	K/uL	0.53	K/uL	209	K/uL	14.45	g/dL	13.05	%	44.95	%	NULL	NULL	NULL	NULL	NULL	NULL	140.5	mEq/L	4.2	mEq/L	9.25	mg/dL	96	mEq/L	154.5	mg/dL	NULL	NULL	22	mEq/L	7.41	units	48	mm Hg
12671705	71	M	WHITE	100.7	NULL	Medicare	English	MARRIED	MICU/SICU	29.6	K/uL	3.94	m/uL	17.81	K/uL	1.23	K/uL	95.5	K/uL	11.35	g/dL	18.05	%	34.5	%	2.6	g/dL	NULL	NULL	NULL	NULL	129.5	mEq/L	3.95	mEq/L	8.2	mg/dL	97.5	mEq/L	119.5	mg/dL	NULL	NULL	14.5	mEq/L	7.38	units	39	mm Hg
12672736	68	F	WHITE	73.5	NULL	Medicare	English	MARRIED	TSICU	7.55	K/uL	3.83	m/uL	2.24	K/uL	0.22	K/uL	160.5	K/uL	11.6	g/dL	12.5	%	35.45	%	2.6	g/dL	NULL	NULL	NULL	NULL	131.5	mEq/L	3.9	mEq/L	7.85	mg/dL	100	mEq/L	115	mg/dL	NULL	NULL	11.5	mEq/L	7.33	units	44.75	mm Hg
12673303	86	M	UNABLE TO OBTAIN	113.65	185	Medicare	English	NULL	CVICU	12.75	K/uL	2.95	m/uL	NULL	NULL	NULL	NULL	140	K/uL	7.53	g/dL	17.65	%	26.4	%	NULL	NULL	NULL	NULL	NULL	NULL	139.25	mEq/L	4.33	mEq/L	9.33	mg/dL	86.5	mEq/L	101	mg/dL	NULL	NULL	12.5	mEq/L	7.44	units	66.5	mm Hg
12679298	81	F	SOUTH AMERICAN	76.8	NULL	Medicare	English	DIVORCED	CCU	6.3	K/uL	3.61	m/uL	NULL	NULL	NULL	NULL	223.33	K/uL	7.6	g/dL	17.53	%	26.87	%	NULL	NULL	NULL	NULL	NULL	NULL	120	mEq/L	3.82	mEq/L	8.88	mg/dL	82.5	mEq/L	120	mg/dL	NULL	NULL	10.33	mEq/L	NULL	NULL	NULL	NULL
12680812	76	F	UNKNOWN	94.3	165	Medicare	English	NULL	SICU	13.05	K/uL	3.09	m/uL	NULL	NULL	NULL	NULL	410.5	K/uL	8.25	g/dL	16.2	%	26.2	%	NULL	NULL	NULL	NULL	NULL	NULL	139	mEq/L	3.5	mEq/L	8.2	mg/dL	101	mEq/L	118	mg/dL	NULL	NULL	16.5	mEq/L	7.41	units	40.14	mm Hg
12681352	62	F	WHITE	39.4	NULL	Medicare	English	WIDOWED	TSICU	4.83	K/uL	3.36	m/uL	6.6	K/uL	0.62	K/uL	291.33	K/uL	10.4	g/dL	12.8	%	31.87	%	NULL	NULL	NULL	NULL	NULL	NULL	138.25	mEq/L	5.18	mEq/L	8.05	mg/dL	110.75	mEq/L	216.25	mg/dL	NULL	NULL	12	mEq/L	7.3	units	36	mm Hg
12692061	91	M	UNKNOWN	67.5	NULL	Medicare	English	MARRIED	SICU	5.4	K/uL	4.28	m/uL	NULL	NULL	NULL	NULL	114	K/uL	13	g/dL	12.5	%	39.3	%	NULL	NULL	NULL	NULL	NULL	NULL	143	mEq/L	3.7	mEq/L	8.4	mg/dL	108	mEq/L	85	mg/dL	NULL	NULL	15	mEq/L	NULL	NULL	NULL	NULL
12698485	91	M	WHITE	51	163	Medicare	English	WIDOWED	CVICU	11.83	K/uL	2.47	m/uL	NULL	NULL	NULL	NULL	160	K/uL	7.48	g/dL	16.67	%	24.28	%	NULL	NULL	NULL	NULL	NULL	NULL	142.5	mEq/L	5.68	mEq/L	9.58	mg/dL	100.5	mEq/L	102	mg/dL	NULL	NULL	18.75	mEq/L	7.36	units	41.33	mm Hg
12698729	86	F	WHITE	76.3	NULL	Medicare	English	SINGLE	CCU	27.13	K/uL	2.78	m/uL	15.42	K/uL	1.58	K/uL	333.33	K/uL	8.5	g/dL	16.83	%	27.4	%	3.1	g/dL	NULL	NULL	NULL	NULL	138	mEq/L	4.28	mEq/L	8.23	mg/dL	106.75	mEq/L	104	mg/dL	NULL	NULL	13.5	mEq/L	7.26	units	50.22	mm Hg
12698907	64	M	WHITE - OTHER EUROPEAN	85.9	170	Medicaid	English	MARRIED	MICU	10.3	K/uL	4.91	m/uL	NULL	NULL	NULL	NULL	138	K/uL	15.05	g/dL	14.35	%	47.25	%	4.3	g/dL	NULL	NULL	NULL	NULL	139.67	mEq/L	4	mEq/L	9.5	mg/dL	98.33	mEq/L	137	mg/dL	NULL	NULL	11.33	mEq/L	7.29	units	72.67	mm Hg
12699927	89	F	WHITE	40	NULL	Medicaid	English	DIVORCED	SICU	NULL	NULL	NULL	NULL	NULL	NULL	NULL	NULL	NULL	NULL	NULL	NULL	NULL	NULL	NULL	NULL	NULL	NULL	NULL	NULL	NULL	NULL	NULL	NULL	NULL	NULL	NULL	NULL	NULL	NULL	NULL	NULL	NULL	NULL	NULL	NULL	7.31	units	45	mm Hg
12704428	71	M	UNABLE TO OBTAIN	75	168	Medicare	English	NULL	CCU	18.07	K/uL	4.62	m/uL	NULL	NULL	NULL	NULL	280	K/uL	14.77	g/dL	14.03	%	43.1	%	NULL	NULL	NULL	NULL	NULL	NULL	135.25	mEq/L	5.03	mEq/L	8.53	mg/dL	102.5	mEq/L	159.25	mg/dL	5.2	%	12.25	mEq/L	NULL	NULL	NULL	NULL
12705112	71	M	UNKNOWN	62.2	152	Medicare	English	MARRIED	Neuro SICU	12.5	K/uL	4.29	m/uL	NULL	NULL	NULL	NULL	114	K/uL	13.6	g/dL	13	%	41.9	%	NULL	NULL	NULL	NULL	NULL	NULL	143	mEq/L	4.2	mEq/L	8	mg/dL	107	mEq/L	126	mg/dL	NULL	NULL	13	mEq/L	7.38	units	36	mm Hg
12708619	73	M	UNKNOWN	103	173	Medicare	English	DIVORCED	SICU	15.1	K/uL	4.15	m/uL	NULL	NULL	NULL	NULL	168	K/uL	13.4	g/dL	11.9	%	40.55	%	NULL	NULL	NULL	NULL	NULL	NULL	140.5	mEq/L	4	mEq/L	8.2	mg/dL	107.5	mEq/L	163.5	mg/dL	NULL	NULL	13.25	mEq/L	7.33	units	48	mm Hg
12711845	69	F	WHITE	68	NULL	Medicare	English	MARRIED	MICU/SICU	20.33	K/uL	3.15	m/uL	16.38	K/uL	1.4	K/uL	365	K/uL	9.47	g/dL	14.43	%	31.4	%	3.35	g/dL	NULL	NULL	NULL	NULL	136.33	mEq/L	4.27	mEq/L	8.6	mg/dL	93.67	mEq/L	170.67	mg/dL	NULL	NULL	12.67	mEq/L	7.32	units	74	mm Hg
12715799	79	F	WHITE	77.25	168	Medicare	English	WIDOWED	CVICU	9.3	K/uL	2.97	m/uL	3.4	K/uL	1.2	K/uL	140.3	K/uL	8.74	g/dL	14.91	%	27.09	%	NULL	NULL	NULL	NULL	NULL	NULL	150.8	mEq/L	5.88	mEq/L	7.98	mg/dL	112.33	mEq/L	127	mg/dL	NULL	NULL	22.2	mEq/L	7.26	units	45.2	mm Hg
12716258	66	M	WHITE	84.3	NULL	Medicare	English	SINGLE	SICU	9.75	K/uL	3.74	m/uL	NULL	NULL	NULL	NULL	241	K/uL	11.05	g/dL	14.85	%	38.4	%	NULL	NULL	NULL	NULL	NULL	NULL	161.29	mEq/L	3.55	mEq/L	8.48	mg/dL	125.17	mEq/L	135.67	mg/dL	NULL	NULL	11.5	mEq/L	NULL	NULL	NULL	NULL
12724975	61	M	UNKNOWN	109.9	170	Medicare	English	NULL	TSICU	19.68	K/uL	4	m/uL	17.69	K/uL	1.12	K/uL	182	K/uL	9.6	g/dL	21.08	%	30.35	%	2.57	g/dL	NULL	NULL	NULL	NULL	136.33	mEq/L	3.93	mEq/L	8.43	mg/dL	105	mEq/L	171.67	mg/dL	NULL	NULL	11	mEq/L	7.24	units	55.14	mm Hg
12726148	66	F	WHITE	102.3	NULL	Medicare	English	SINGLE	MICU	18.58	K/uL	4.11	m/uL	15.32	K/uL	0.36	K/uL	258.5	K/uL	11.6	g/dL	17.7	%	36.9	%	2.5	g/dL	NULL	NULL	NULL	NULL	146.75	mEq/L	4.73	mEq/L	8.4	mg/dL	109.25	mEq/L	165	mg/dL	NULL	NULL	21	mEq/L	7.21	units	47.21	mm Hg
12729405	79	F	WHITE	49.9	150	Medicare	English	SINGLE	TSICU	23.8	K/uL	2.7	m/uL	NULL	NULL	NULL	NULL	610	K/uL	7.3	g/dL	17.4	%	25.1	%	NULL	NULL	NULL	NULL	NULL	NULL	146	mEq/L	4.8	mEq/L	7.6	mg/dL	103	mEq/L	113	mg/dL	NULL	NULL	19	mEq/L	NULL	NULL	NULL	NULL
12739337	71	F	WHITE	73.7	NULL	Medicare	English	SINGLE	MICU	15.2	K/uL	3.06	m/uL	15.72	K/uL	0.89	K/uL	155.67	K/uL	8.85	g/dL	18.07	%	27.28	%	NULL	NULL	NULL	NULL	NULL	NULL	136	mEq/L	4.25	mEq/L	7.55	mg/dL	101.5	mEq/L	109	mg/dL	NULL	NULL	11.5	mEq/L	7.3	units	51	mm Hg
12747096	82	M	WHITE	62.1	170	Medicare	English	MARRIED	CVICU	6.21	K/uL	2.74	m/uL	4.43	K/uL	0.74	K/uL	105.55	K/uL	8.2	g/dL	15.58	%	24.97	%	NULL	NULL	NULL	NULL	NULL	NULL	141	mEq/L	4.3	mEq/L	8.2	mg/dL	107.5	mEq/L	146.5	mg/dL	NULL	NULL	9.25	mEq/L	7.4	units	41.22	mm Hg
12748449	70	F	WHITE	74.1	NULL	Medicare	English	DIVORCED	MICU	15.75	K/uL	3.65	m/uL	17.13	K/uL	0.43	K/uL	338.5	K/uL	10.45	g/dL	13.15	%	33.25	%	NULL	NULL	NULL	NULL	NULL	NULL	131.33	mEq/L	3.77	mEq/L	8.5	mg/dL	93.33	mEq/L	109.33	mg/dL	NULL	NULL	14.67	mEq/L	7.38	units	46	mm Hg
12751607	70	M	WHITE	75.6	NULL	Medicare	English	SINGLE	MICU	8	K/uL	2.59	m/uL	NULL	NULL	NULL	NULL	193	K/uL	8.4	g/dL	14.3	%	25.6	%	2.1	g/dL	NULL	NULL	NULL	NULL	138	mEq/L	3.53	mEq/L	7.13	mg/dL	110.25	mEq/L	121	mg/dL	NULL	NULL	14.75	mEq/L	7.3	units	27	mm Hg
12752700	72	F	WHITE	63.2	163	Medicare	English	MARRIED	CVICU	6.7	K/uL	3.75	m/uL	NULL	NULL	NULL	NULL	162.67	K/uL	11.83	g/dL	14.7	%	36	%	NULL	NULL	NULL	NULL	NULL	NULL	134.67	mEq/L	3.83	mEq/L	7.9	mg/dL	91.67	mEq/L	97.33	mg/dL	NULL	NULL	12	mEq/L	7.48	units	43	mm Hg
12755225	68	F	WHITE	92.9	150	Medicare	English	MARRIED	Neuro Intermediate	14	K/uL	4.28	m/uL	NULL	NULL	NULL	NULL	138	K/uL	11.6	g/dL	15.6	%	36.5	%	NULL	NULL	NULL	NULL	NULL	NULL	143	mEq/L	4.1	mEq/L	8.4	mg/dL	109	mEq/L	161	mg/dL	NULL	NULL	13	mEq/L	7.38	units	38	mm Hg
12759912	91	F	WHITE	48.2	NULL	Medicare	English	WIDOWED	MICU/SICU	7.6	K/uL	3.89	m/uL	NULL	NULL	NULL	NULL	212	K/uL	13.1	g/dL	14.1	%	39.8	%	NULL	NULL	NULL	NULL	NULL	NULL	144	mEq/L	4.3	mEq/L	8.8	mg/dL	106	mEq/L	112	mg/dL	NULL	NULL	15	mEq/L	NULL	NULL	NULL	NULL
12762280	83	F	WHITE	57.1	NULL	Medicare	English	DIVORCED	MICU/SICU	9.4	K/uL	3.07	m/uL	NULL	NULL	NULL	NULL	348	K/uL	8.5	g/dL	17	%	28.2	%	NULL	NULL	NULL	NULL	NULL	NULL	133	mEq/L	3.4	mEq/L	8.1	mg/dL	102	mEq/L	134	mg/dL	NULL	NULL	14	mEq/L	NULL	NULL	NULL	NULL
12762523	74	F	WHITE	56.55	NULL	Medicare	English	WIDOWED	CCU	7.7	K/uL	3.22	m/uL	3.91	K/uL	2.84	K/uL	223	K/uL	10.2	g/dL	15.1	%	28.9	%	NULL	NULL	NULL	NULL	NULL	NULL	137	mEq/L	4.55	mEq/L	8.3	mg/dL	102.5	mEq/L	122.5	mg/dL	NULL	NULL	11.5	mEq/L	NULL	NULL	NULL	NULL
12770117	78	M	WHITE	85.9	173	Medicare	English	MARRIED	Neuro Intermediate	25.7	K/uL	5.33	m/uL	9.97	K/uL	15.79	K/uL	160.5	K/uL	14.2	g/dL	16.35	%	44.5	%	4	g/dL	NULL	NULL	NULL	NULL	141.5	mEq/L	4.35	mEq/L	9.5	mg/dL	105	mEq/L	99	mg/dL	NULL	NULL	10.5	mEq/L	NULL	NULL	NULL	NULL
12771269	72	M	WHITE	80	NULL	Medicare	English	MARRIED	MICU	16.4	K/uL	3.69	m/uL	NULL	NULL	NULL	NULL	404	K/uL	11.4	g/dL	15.9	%	36.3	%	NULL	NULL	NULL	NULL	NULL	NULL	139	mEq/L	4.6	mEq/L	9	mg/dL	99	mEq/L	124	mg/dL	NULL	NULL	13	mEq/L	7.4	units	49	mm Hg
12779135	66	M	UNKNOWN	96	NULL	Private	English	SINGLE	CVICU	16.35	K/uL	3.81	m/uL	16.97	K/uL	0.5	K/uL	123	K/uL	12.15	g/dL	13.15	%	34.6	%	3.2	g/dL	NULL	NULL	NULL	NULL	141	mEq/L	3.4	mEq/L	8.27	mg/dL	107.67	mEq/L	120.33	mg/dL	4.5	%	14.33	mEq/L	7.44	units	34	mm Hg
12780478	75	M	WHITE	100.4	183	Medicare	English	MARRIED	CVICU	6.95	K/uL	4.79	m/uL	NULL	NULL	NULL	NULL	191.5	K/uL	13.55	g/dL	14.4	%	42.95	%	3.9	g/dL	NULL	NULL	NULL	NULL	139	mEq/L	4.8	mEq/L	8.95	mg/dL	104	mEq/L	106	mg/dL	5.6	%	11	mEq/L	7.34	units	NULL	NULL
12781031	65	M	HISPANIC/LATINO - PUERTO RICAN	61.8	157	Medicaid	Spanish	SINGLE	MICU	12.23	K/uL	4.22	m/uL	NULL	NULL	NULL	NULL	291.5	K/uL	13.53	g/dL	12.83	%	40.9	%	2.95	g/dL	NULL	NULL	NULL	NULL	130.25	mEq/L	4.45	mEq/L	8.7	mg/dL	97	mEq/L	248	mg/dL	NULL	NULL	15.75	mEq/L	7.37	units	42.36	mm Hg
12797435	83	M	WHITE	111.1	NULL	Medicare	English	MARRIED	MICU/SICU	13	K/uL	4.03	m/uL	10.98	K/uL	0.59	K/uL	248	K/uL	11.1	g/dL	14.7	%	36.8	%	3.1	g/dL	NULL	NULL	NULL	NULL	142	mEq/L	4.2	mEq/L	8.9	mg/dL	101	mEq/L	78	mg/dL	NULL	NULL	17	mEq/L	7.39	units	51	mm Hg
12797755	90	M	WHITE - OTHER EUROPEAN	85.3	169	Medicare	English	WIDOWED	CVICU	10.7	K/uL	4.26	m/uL	NULL	NULL	NULL	NULL	134.5	K/uL	11.95	g/dL	15.4	%	36	%	3.9	g/dL	NULL	NULL	NULL	NULL	142.5	mEq/L	4.05	mEq/L	8.3	mg/dL	107.5	mEq/L	162	mg/dL	NULL	NULL	14	mEq/L	7.37	units	NULL	NULL
12799272	81	M	WHITE	93.5	175	Medicare	English	MARRIED	CVICU	9.63	K/uL	3.05	m/uL	3.75	K/uL	0.87	K/uL	134.17	K/uL	9.12	g/dL	16.15	%	27.45	%	NULL	NULL	NULL	NULL	NULL	NULL	139.8	mEq/L	3.84	mEq/L	8.7	mg/dL	105	mEq/L	117.25	mg/dL	NULL	NULL	16.6	mEq/L	7.4	units	38.81	mm Hg
12805659	69	M	WHITE	76.4	NULL	Private	English	SINGLE	SICU	11.5	K/uL	4.97	m/uL	NULL	NULL	NULL	NULL	291	K/uL	14.5	g/dL	13.7	%	44	%	NULL	NULL	NULL	NULL	NULL	NULL	142	mEq/L	3.9	mEq/L	9.5	mg/dL	102	mEq/L	97	mg/dL	5.8	%	17	mEq/L	NULL	NULL	NULL	NULL
12807320	69	M	WHITE	81.1	NULL	Medicare	English	MARRIED	CCU	7.03	K/uL	2.28	m/uL	NULL	NULL	NULL	NULL	140	K/uL	7.93	g/dL	24.1	%	22.97	%	2.8	g/dL	NULL	NULL	NULL	NULL	135	mEq/L	3.85	mEq/L	8	mg/dL	96	mEq/L	128	mg/dL	NULL	NULL	13	mEq/L	NULL	NULL	NULL	NULL
12810752	86	F	UNKNOWN	50.65	157	Medicare	English	NULL	TSICU	10.88	K/uL	3.39	m/uL	NULL	NULL	NULL	NULL	270.4	K/uL	8.18	g/dL	17.8	%	27.74	%	2.9	g/dL	NULL	NULL	NULL	NULL	140.6	mEq/L	4.68	mEq/L	8.14	mg/dL	106.2	mEq/L	139.4	mg/dL	NULL	NULL	9.8	mEq/L	7.37	units	44.8	mm Hg
12831789	49	M	WHITE	98.9	183	Private	English	SINGLE	CCU	7.55	K/uL	4.87	m/uL	5.66	K/uL	0.82	K/uL	75	K/uL	12.6	g/dL	17.85	%	39.85	%	NULL	NULL	NULL	NULL	NULL	NULL	137	mEq/L	3.85	mEq/L	9	mg/dL	104.5	mEq/L	93.5	mg/dL	NULL	NULL	12	mEq/L	NULL	NULL	NULL	NULL
12835323	76	M	UNKNOWN	107.5	175	Medicare	English	NULL	MICU	11.97	K/uL	2.6	m/uL	10.71	K/uL	0.3	K/uL	180	K/uL	7.7	g/dL	17.13	%	23.73	%	NULL	NULL	NULL	NULL	NULL	NULL	141	mEq/L	5.13	mEq/L	7.83	mg/dL	104	mEq/L	157	mg/dL	NULL	NULL	19.33	mEq/L	7.32	units	35.8	mm Hg
12835781	66	M	WHITE - OTHER EUROPEAN	106.8	NULL	Medicare	English	SINGLE	Neuro Intermediate	10.1	K/uL	4.55	m/uL	NULL	NULL	NULL	NULL	174	K/uL	13.75	g/dL	13.15	%	42.1	%	NULL	NULL	NULL	NULL	NULL	NULL	142.5	mEq/L	4.15	mEq/L	8.65	mg/dL	104.5	mEq/L	158	mg/dL	NULL	NULL	16	mEq/L	NULL	NULL	NULL	NULL
12837527	74	M	WHITE	64	168	Medicare	English	MARRIED	CCU	13.9	K/uL	4.36	m/uL	NULL	NULL	NULL	NULL	319	K/uL	12.7	g/dL	14.25	%	38.7	%	NULL	NULL	NULL	NULL	NULL	NULL	139.5	mEq/L	4.1	mEq/L	8.2	mg/dL	107	mEq/L	131	mg/dL	NULL	NULL	17	mEq/L	7.37	units	34	mm Hg
12840278	71	F	WHITE	44.2	160	Medicare	English	MARRIED	Neuro Stepdown	16.87	K/uL	3.98	m/uL	NULL	NULL	NULL	NULL	211.67	K/uL	9.73	g/dL	17.47	%	34.47	%	3.75	g/dL	NULL	NULL	NULL	NULL	133.25	mEq/L	4.03	mEq/L	8.68	mg/dL	96.25	mEq/L	142	mg/dL	NULL	NULL	21	mEq/L	7.29	units	54.86	mm Hg
12847190	71	M	WHITE	64.1	NULL	Medicare	English	SINGLE	MICU	13.43	K/uL	2.88	m/uL	14	K/uL	1.86	K/uL	193.5	K/uL	8	g/dL	17.33	%	23.3	%	NULL	NULL	NULL	NULL	NULL	NULL	131	mEq/L	5.1	mEq/L	7.83	mg/dL	102	mEq/L	84.67	mg/dL	NULL	NULL	17.33	mEq/L	7.33	units	39	mm Hg
12851901	79	M	WHITE	77	NULL	Medicare	English	MARRIED	Neuro Stepdown	8	K/uL	4.18	m/uL	NULL	NULL	NULL	NULL	143	K/uL	13.2	g/dL	12.6	%	40.7	%	NULL	NULL	NULL	NULL	NULL	NULL	139	mEq/L	4.5	mEq/L	NULL	NULL	102	mEq/L	100	mg/dL	NULL	NULL	16	mEq/L	NULL	NULL	NULL	NULL
12852198	79	M	WHITE	102.7	NULL	Medicare	English	SINGLE	MICU	10.9	K/uL	4.7	m/uL	NULL	NULL	NULL	NULL	127	K/uL	12.5	g/dL	17.3	%	39.2	%	NULL	NULL	NULL	NULL	NULL	NULL	140	mEq/L	4.3	mEq/L	8.5	mg/dL	103	mEq/L	192	mg/dL	NULL	NULL	14	mEq/L	7.42	units	43	mm Hg
12855113	87	F	UNKNOWN	60.7	163	Medicare	English	NULL	MICU/SICU	15.5	K/uL	3.31	m/uL	14.61	K/uL	0.91	K/uL	229	K/uL	10	g/dL	15.75	%	31.15	%	NULL	NULL	NULL	NULL	NULL	NULL	137.67	mEq/L	3.73	mEq/L	8.23	mg/dL	101.33	mEq/L	120	mg/dL	NULL	NULL	13.67	mEq/L	7.37	units	53.33	mm Hg
12855246	53	F	BLACK/AFRICAN	70	163	Medicaid	English	SINGLE	MICU	11.66	K/uL	3.46	m/uL	15.67	K/uL	0.49	K/uL	130.43	K/uL	10.21	g/dL	14.96	%	31.66	%	1.6	g/dL	NULL	NULL	NULL	NULL	138.5	mEq/L	5	mEq/L	7.23	mg/dL	103.5	mEq/L	318	mg/dL	NULL	NULL	18.5	mEq/L	7.16	units	66.2	mm Hg
12860941	82	F	WHITE	100	163	Medicare	English	MARRIED	MICU	28.03	K/uL	2.71	m/uL	22.93	K/uL	2.93	K/uL	385.43	K/uL	8.27	g/dL	15.67	%	25.13	%	2.6	g/dL	NULL	NULL	NULL	NULL	133.86	mEq/L	5.4	mEq/L	7.63	mg/dL	97.14	mEq/L	245.43	mg/dL	NULL	NULL	15.86	mEq/L	7.31	units	42.67	mm Hg
12863886	68	M	WHITE	73.5	NULL	Medicare	English	WIDOWED	MICU/SICU	6.7	K/uL	4.5	m/uL	NULL	NULL	NULL	NULL	228	K/uL	13.5	g/dL	12.7	%	41	%	NULL	NULL	NULL	NULL	NULL	NULL	137	mEq/L	4.3	mEq/L	9.4	mg/dL	98	mEq/L	141	mg/dL	NULL	NULL	17	mEq/L	7.38	units	45	mm Hg
12872769	83	F	WHITE	67.65	165	Medicare	English	WIDOWED	SICU	8	K/uL	2.95	m/uL	NULL	NULL	NULL	NULL	147	K/uL	8.88	g/dL	15.08	%	26.83	%	3.1	g/dL	NULL	NULL	NULL	NULL	143	mEq/L	3.6	mEq/L	8	mg/dL	107	mEq/L	99	mg/dL	NULL	NULL	12	mEq/L	NULL	NULL	NULL	NULL
12876712	82	M	WHITE	84.7	191	Medicare	English	WIDOWED	CVICU	11	K/uL	4.32	m/uL	8.83	K/uL	1.41	K/uL	138.6	K/uL	12.32	g/dL	15.9	%	39.94	%	NULL	NULL	NULL	NULL	NULL	NULL	140.5	mEq/L	4.5	mEq/L	8.85	mg/dL	108.67	mEq/L	122	mg/dL	NULL	NULL	8.33	mEq/L	7.4	units	42.82	mm Hg
12882005	86	M	UNKNOWN	69	170	Medicare	Other	NULL	TSICU	6.5	K/uL	3.7	m/uL	5.25	K/uL	0.55	K/uL	163	K/uL	11.6	g/dL	14.2	%	38.8	%	3	g/dL	NULL	NULL	NULL	NULL	145	mEq/L	4.6	mEq/L	8.9	mg/dL	105	mEq/L	135	mg/dL	NULL	NULL	11	mEq/L	7.41	units	55.75	mm Hg
12882754	67	F	WHITE - OTHER EUROPEAN	57.7	165	Medicare	English	MARRIED	CCU	7.5	K/uL	4.51	m/uL	NULL	NULL	NULL	NULL	204	K/uL	13.2	g/dL	12.9	%	40.4	%	NULL	NULL	NULL	NULL	NULL	NULL	136	mEq/L	4.1	mEq/L	9	mg/dL	100	mEq/L	119	mg/dL	NULL	NULL	13	mEq/L	NULL	NULL	NULL	NULL
12883995	52	M	WHITE	105	170	Private	English	SINGLE	SICU	23.45	K/uL	4.48	m/uL	NULL	NULL	NULL	NULL	178.5	K/uL	12.65	g/dL	18.4	%	38.6	%	NULL	NULL	NULL	NULL	NULL	NULL	140	mEq/L	4.35	mEq/L	7.85	mg/dL	101	mEq/L	119.5	mg/dL	NULL	NULL	11.5	mEq/L	7.37	units	51	mm Hg
12884654	66	M	BLACK/AFRICAN AMERICAN	109	173	Medicare	English	NULL	SICU	12.2	K/uL	5.23	m/uL	NULL	NULL	NULL	NULL	271	K/uL	15.9	g/dL	15.6	%	50.2	%	3.6	g/dL	NULL	NULL	NULL	NULL	134	mEq/L	3.8	mEq/L	8.7	mg/dL	98	mEq/L	119	mg/dL	NULL	NULL	13	mEq/L	7.31	units	52	mm Hg
12888335	82	M	WHITE	59.6	178	Medicare	English	MARRIED	Neuro Stepdown	15.3	K/uL	2.75	m/uL	NULL	NULL	NULL	NULL	250	K/uL	9.1	g/dL	13	%	29.1	%	NULL	NULL	NULL	NULL	NULL	NULL	141	mEq/L	3.9	mEq/L	8.1	mg/dL	107	mEq/L	95	mg/dL	NULL	NULL	15	mEq/L	NULL	NULL	NULL	NULL
12889749	83	M	WHITE	94.1	NULL	Medicare	English	SINGLE	SICU	10.5	K/uL	4.22	m/uL	7.99	K/uL	1.66	K/uL	160	K/uL	12.3	g/dL	14.4	%	38.3	%	NULL	NULL	NULL	NULL	NULL	NULL	141	mEq/L	4.1	mEq/L	8.9	mg/dL	107	mEq/L	87	mg/dL	NULL	NULL	15	mEq/L	NULL	NULL	NULL	NULL
12892227	89	F	WHITE - OTHER EUROPEAN	51.7	NULL	Medicare	English	MARRIED	MICU	NULL	NULL	NULL	NULL	NULL	NULL	NULL	NULL	NULL	NULL	NULL	NULL	NULL	NULL	NULL	NULL	NULL	NULL	NULL	NULL	NULL	NULL	137	mEq/L	4.1	mEq/L	8.5	mg/dL	102	mEq/L	89	mg/dL	NULL	NULL	10	mEq/L	NULL	NULL	NULL	NULL
12900275	58	M	WHITE	71.6	178	Medicaid	English	DIVORCED	MICU/SICU	9	K/uL	2.42	m/uL	8.79	K/uL	0.67	K/uL	367	K/uL	8.63	g/dL	13.57	%	25.63	%	NULL	NULL	NULL	NULL	NULL	NULL	142.67	mEq/L	3.37	mEq/L	7.93	mg/dL	107.33	mEq/L	106.67	mg/dL	NULL	NULL	13	mEq/L	7.41	units	49	mm Hg
12902185	68	F	WHITE	68.2	NULL	Medicare	English	SINGLE	Neuro Intermediate	9.5	K/uL	4.18	m/uL	NULL	NULL	NULL	NULL	146	K/uL	12.4	g/dL	12.5	%	38.9	%	NULL	NULL	NULL	NULL	NULL	NULL	142.67	mEq/L	4.5	mEq/L	8.8	mg/dL	104	mEq/L	113	mg/dL	NULL	NULL	13	mEq/L	NULL	NULL	NULL	NULL
12913669	59	F	WHITE	89.15	163	Medicare	English	MARRIED	CCU	12.7	K/uL	2.62	m/uL	NULL	NULL	NULL	NULL	302.5	K/uL	7.35	g/dL	19.1	%	25.35	%	3.6	g/dL	NULL	NULL	NULL	NULL	138.67	mEq/L	4.23	mEq/L	8.5	mg/dL	99	mEq/L	170	mg/dL	NULL	NULL	16.67	mEq/L	NULL	NULL	NULL	NULL
12926332	91	M	UNKNOWN	76.4	185	Medicare	English	NULL	MICU	12.2	K/uL	4.14	m/uL	11.35	K/uL	0.73	K/uL	268	K/uL	13.8	g/dL	14.7	%	41.8	%	2.5	g/dL	NULL	NULL	NULL	NULL	140.5	mEq/L	3.8	mEq/L	8.2	mg/dL	101	mEq/L	104	mg/dL	NULL	NULL	14	mEq/L	7.43	units	43.5	mm Hg
12927984	81	M	WHITE	86.55	165	Medicare	English	WIDOWED	CVICU	10.1	K/uL	2.91	m/uL	NULL	NULL	NULL	NULL	91.67	K/uL	8.6	g/dL	16.37	%	25.93	%	NULL	NULL	NULL	NULL	NULL	NULL	137	mEq/L	4.77	mEq/L	8.7	mg/dL	102.33	mEq/L	125	mg/dL	NULL	NULL	14	mEq/L	7.42	units	45	mm Hg
12928183	71	M	WHITE	114.9	170	Medicare	English	WIDOWED	CVICU	16.87	K/uL	3.44	m/uL	12.84	K/uL	1.55	K/uL	152.33	K/uL	10.2	g/dL	15.37	%	32.63	%	NULL	NULL	NULL	NULL	NULL	NULL	139	mEq/L	5.25	mEq/L	7.8	mg/dL	109.5	mEq/L	108	mg/dL	NULL	NULL	12	mEq/L	7.3	units	46.25	mm Hg
12929983	81	F	WHITE	70.9	NULL	Private	English	WIDOWED	MICU	6.9	K/uL	3.05	m/uL	5.74	K/uL	0.69	K/uL	139.75	K/uL	10.01	g/dL	16.9	%	29.9	%	NULL	NULL	NULL	NULL	NULL	NULL	137	mEq/L	4.5	mEq/L	8.35	mg/dL	105.33	mEq/L	122.33	mg/dL	NULL	NULL	11.33	mEq/L	7.38	units	41	mm Hg
12930740	80	M	WHITE	68.5	NULL	Medicare	English	MARRIED	TSICU	12.1	K/uL	4.08	m/uL	7.46	K/uL	2.59	K/uL	296	K/uL	12.9	g/dL	15.9	%	38.4	%	NULL	NULL	NULL	NULL	NULL	NULL	136	mEq/L	4.6	mEq/L	8.7	mg/dL	100	mEq/L	80	mg/dL	NULL	NULL	13	mEq/L	NULL	NULL	NULL	NULL
12935402	81	M	WHITE	107.833	NULL	Medicare	English	MARRIED	CCU	12.43	K/uL	3.78	m/uL	7.58	K/uL	3.72	K/uL	166.25	K/uL	11.9	g/dL	16.3	%	37.7	%	NULL	NULL	NULL	NULL	NULL	NULL	139.33	mEq/L	5	mEq/L	7.87	mg/dL	103	mEq/L	130	mg/dL	NULL	NULL	14	mEq/L	7.28	units	55.5	mm Hg
12938211	57	M	WHITE	137.55	NULL	Private	English	MARRIED	MICU	8.7	K/uL	3.65	m/uL	NULL	NULL	NULL	NULL	147	K/uL	11.8	g/dL	12.7	%	35.2	%	NULL	NULL	NULL	NULL	NULL	NULL	139	mEq/L	5.3	mEq/L	9	mg/dL	99	mEq/L	218	mg/dL	NULL	NULL	11	mEq/L	7.32	units	56	mm Hg
12940989	87	M	WHITE	99.8	NULL	Medicare	Portuguese	MARRIED	CCU	6.6	K/uL	3.77	m/uL	NULL	NULL	NULL	NULL	151	K/uL	12.2	g/dL	11.9	%	37.9	%	NULL	NULL	NULL	NULL	NULL	NULL	142	mEq/L	4.1	mEq/L	8.9	mg/dL	101	mEq/L	130	mg/dL	NULL	NULL	11	mEq/L	NULL	NULL	NULL	NULL
12942035	66	F	WHITE	49.1	NULL	Medicare	English	MARRIED	Neuro Intermediate	21.5	K/uL	3.82	m/uL	NULL	NULL	NULL	NULL	249	K/uL	12.45	g/dL	12.9	%	35.85	%	3.2	g/dL	NULL	NULL	NULL	NULL	131	mEq/L	4.1	mEq/L	8.15	mg/dL	101.5	mEq/L	159	mg/dL	NULL	NULL	9.5	mEq/L	NULL	NULL	NULL	NULL
12942169	85	M	WHITE	99.55	188	Medicare	English	MARRIED	Neuro SICU	10.1	K/uL	4.11	m/uL	NULL	NULL	NULL	NULL	140	K/uL	13.5	g/dL	13.9	%	39.8	%	NULL	NULL	NULL	NULL	NULL	NULL	140	mEq/L	4.1	mEq/L	8.55	mg/dL	104	mEq/L	142	mg/dL	NULL	NULL	12	mEq/L	7.4	units	38	mm Hg
12943357	79	M	WHITE	44	173	Medicare	English	DIVORCED	CCU	9.3	K/uL	3.97	m/uL	8.86	K/uL	0.68	K/uL	125	K/uL	11.9	g/dL	13.55	%	38.25	%	NULL	NULL	NULL	NULL	NULL	NULL	136	mEq/L	4.75	mEq/L	8.75	mg/dL	98.5	mEq/L	124.5	mg/dL	NULL	NULL	12	mEq/L	7.22	units	71	mm Hg
12954318	65	M	BLACK/AFRICAN AMERICAN	72	NULL	Medicaid	English	SINGLE	MICU/SICU	12.6	K/uL	3.11	m/uL	NULL	NULL	NULL	NULL	136.5	K/uL	9.8	g/dL	16.7	%	27.3	%	2.6	g/dL	NULL	NULL	NULL	NULL	132	mEq/L	4.25	mEq/L	8.2	mg/dL	102	mEq/L	137	mg/dL	NULL	NULL	11.5	mEq/L	7.37	units	32	mm Hg
12955208	60	F	WHITE	70.5	165	Medicaid	English	DIVORCED	CVICU	16.77	K/uL	2.72	m/uL	10.09	K/uL	3.37	K/uL	103	K/uL	8.6	g/dL	11.57	%	26.54	%	NULL	NULL	NULL	NULL	NULL	NULL	136	mEq/L	4.35	mEq/L	NULL	NULL	106.5	mEq/L	148	mg/dL	NULL	NULL	7	mEq/L	7.4	units	44.17	mm Hg
12956096	62	F	WHITE	35.25	NULL	Private	English	MARRIED	MICU/SICU	15.8	K/uL	2.3	m/uL	NULL	NULL	NULL	NULL	186	K/uL	7.2	g/dL	15.9	%	22.3	%	NULL	NULL	NULL	NULL	NULL	NULL	131	mEq/L	5.2	mEq/L	8.5	mg/dL	97	mEq/L	93	mg/dL	NULL	NULL	12	mEq/L	7.4	units	40	mm Hg
12963278	57	M	UNKNOWN	94	183	Medicaid	English	NULL	MICU/SICU	5.5	K/uL	4.11	m/uL	NULL	NULL	NULL	NULL	94	K/uL	13.17	g/dL	14.9	%	41	%	3.3	g/dL	NULL	NULL	NULL	NULL	144	mEq/L	4	mEq/L	7.8	mg/dL	120	mEq/L	130	mg/dL	NULL	NULL	8	mEq/L	7.32	units	42.5	mm Hg
12965009	51	M	WHITE	75.1	182	Medicare	English	SINGLE	MICU	11.65	K/uL	4.57	m/uL	11.24	K/uL	1.76	K/uL	169	K/uL	10.9	g/dL	19.75	%	35.8	%	NULL	NULL	NULL	NULL	NULL	NULL	139.5	mEq/L	3.85	mEq/L	9.2	mg/dL	101.5	mEq/L	165.5	mg/dL	NULL	NULL	17	mEq/L	NULL	NULL	NULL	NULL
12968330	63	F	UNKNOWN	108.3	160	Private	English	NULL	TSICU	16.3	K/uL	2.88	m/uL	NULL	NULL	NULL	NULL	171.2	K/uL	8.76	g/dL	14.28	%	25.36	%	1.9	g/dL	NULL	NULL	NULL	NULL	130.5	mEq/L	3.73	mEq/L	7.68	mg/dL	104	mEq/L	171.75	mg/dL	5.9	%	16	mEq/L	7.24	units	38.2	mm Hg
12970666	73	M	WHITE	51.8	NULL	Medicare	English	MARRIED	MICU	7.5	K/uL	2.41	m/uL	6.29	K/uL	0.46	K/uL	116	K/uL	8.3	g/dL	14.5	%	26	%	2.8	g/dL	NULL	NULL	NULL	NULL	138.5	mEq/L	4.2	mEq/L	8.3	mg/dL	105	mEq/L	118.5	mg/dL	NULL	NULL	6.5	mEq/L	7.3	units	61.63	mm Hg
12972442	84	F	BLACK/AFRICAN AMERICAN	51	NULL	Other	English	SINGLE	MICU	10.7	K/uL	3.97	m/uL	NULL	NULL	NULL	NULL	168	K/uL	11.75	g/dL	16.4	%	38.15	%	3.6	g/dL	NULL	NULL	NULL	NULL	134.67	mEq/L	4.03	mEq/L	9.8	mg/dL	97.33	mEq/L	239.67	mg/dL	NULL	NULL	19	mEq/L	7.43	units	35	mm Hg
12972832	77	M	UNKNOWN	85	NULL	Medicare	English	NULL	SICU	17.2	K/uL	4.53	m/uL	NULL	NULL	NULL	NULL	280	K/uL	13.4	g/dL	14.7	%	40.6	%	NULL	NULL	NULL	NULL	NULL	NULL	138	mEq/L	4	mEq/L	8.9	mg/dL	103	mEq/L	122	mg/dL	NULL	NULL	15	mEq/L	NULL	NULL	NULL	NULL
12972923	30	F	WHITE - EASTERN EUROPEAN	57	NULL	Medicaid	English	SINGLE	Neuro Intermediate	16.5	K/uL	4.24	m/uL	NULL	NULL	NULL	NULL	174	K/uL	12.4	g/dL	12	%	37	%	NULL	NULL	NULL	NULL	NULL	NULL	138	mEq/L	3.9	mEq/L	8.5	mg/dL	106	mEq/L	131	mg/dL	NULL	NULL	11	mEq/L	NULL	NULL	NULL	NULL
12974563	73	F	WHITE	850	NULL	Medicare	English	WIDOWED	Neuro SICU	9.75	K/uL	3.51	m/uL	NULL	NULL	NULL	NULL	174	K/uL	11.13	g/dL	13.4	%	33.98	%	NULL	NULL	NULL	NULL	NULL	NULL	143	mEq/L	3.95	mEq/L	8.75	mg/dL	111	mEq/L	101	mg/dL	NULL	NULL	14.5	mEq/L	NULL	NULL	NULL	NULL
12975437	47	F	WHITE	87.4	168	Private	English	MARRIED	TSICU	7.65	K/uL	3.17	m/uL	NULL	NULL	NULL	NULL	54.5	K/uL	10.53	g/dL	20.9	%	31.8	%	2.6	g/dL	NULL	NULL	NULL	NULL	142	mEq/L	5.6	mEq/L	7.8	mg/dL	107	mEq/L	101	mg/dL	NULL	NULL	16	mEq/L	7.49	units	31	mm Hg
12979369	76	M	UNKNOWN	90.9	NULL	Medicare	English	MARRIED	CCU	18	K/uL	3.56	m/uL	NULL	NULL	NULL	NULL	137.5	K/uL	12.3	g/dL	12.7	%	35.45	%	NULL	NULL	NULL	NULL	NULL	NULL	139.5	mEq/L	4.05	mEq/L	9.95	mg/dL	100.5	mEq/L	151	mg/dL	NULL	NULL	20.5	mEq/L	7.42	units	37	mm Hg
12980551	80	M	WHITE	69.9	NULL	Medicare	English	DIVORCED	MICU	6.8	K/uL	3.06	m/uL	5.85	K/uL	0.55	K/uL	134	K/uL	9.3	g/dL	14.8	%	30	%	NULL	NULL	NULL	NULL	NULL	NULL	136	mEq/L	4.7	mEq/L	9.4	mg/dL	93	mEq/L	131	mg/dL	NULL	NULL	18	mEq/L	NULL	NULL	NULL	NULL
12982416	64	F	UNKNOWN	65.05	NULL	Medicare	English	NULL	Neuro Stepdown	11.65	K/uL	3.85	m/uL	NULL	NULL	NULL	NULL	170.5	K/uL	13.1	g/dL	13.65	%	37.4	%	NULL	NULL	NULL	NULL	NULL	NULL	139	mEq/L	4.25	mEq/L	8.65	mg/dL	107	mEq/L	132	mg/dL	4.7	%	16.5	mEq/L	7.33	units	42.67	mm Hg
12985940	70	M	WHITE	94	175	Medicaid	English	DIVORCED	MICU/SICU	8.1	K/uL	3.55	m/uL	6.77	K/uL	0.41	K/uL	311	K/uL	10.43	g/dL	15.07	%	33.67	%	NULL	NULL	NULL	NULL	NULL	NULL	138.25	mEq/L	4.95	mEq/L	7.78	mg/dL	103.25	mEq/L	112.25	mg/dL	NULL	NULL	12.25	mEq/L	7.36	units	44.17	mm Hg
12988365	90	F	WHITE	54	NULL	Medicare	English	MARRIED	MICU/SICU	NULL	NULL	NULL	NULL	NULL	NULL	NULL	NULL	NULL	NULL	NULL	NULL	NULL	NULL	NULL	NULL	NULL	NULL	NULL	NULL	NULL	NULL	NULL	NULL	NULL	NULL	NULL	NULL	NULL	NULL	NULL	NULL	NULL	NULL	NULL	NULL	NULL	NULL	NULL	NULL
12993105	59	M	WHITE	119.4	183	Medicaid	English	NULL	MICU	5.85	K/uL	3.03	m/uL	NULL	NULL	NULL	NULL	199	K/uL	10.05	g/dL	22.35	%	30.6	%	2.7	g/dL	NULL	NULL	NULL	NULL	132	mEq/L	3.58	mEq/L	7.77	mg/dL	92.25	mEq/L	100.75	mg/dL	NULL	NULL	21.25	mEq/L	7.19	units	46.86	mm Hg
12999691	69	M	WHITE	59.4	163	Medicare	English	SINGLE	MICU	5.4	K/uL	2.83	m/uL	NULL	NULL	NULL	NULL	113	K/uL	11	g/dL	14.2	%	31.4	%	NULL	NULL	NULL	NULL	NULL	NULL	133	mEq/L	3.6	mEq/L	8.9	mg/dL	96	mEq/L	125.5	mg/dL	NULL	NULL	13	mEq/L	7.34	units	51.5	mm Hg
13002213	43	M	WHITE	123.6	NULL	Medicare	English	SINGLE	MICU	14.63	K/uL	2.3	m/uL	NULL	NULL	NULL	NULL	47	K/uL	7.65	g/dL	24.08	%	23	%	NULL	NULL	NULL	NULL	NULL	NULL	126.5	mEq/L	5.05	mEq/L	9.5	mg/dL	97.5	mEq/L	120.5	mg/dL	NULL	NULL	14.5	mEq/L	7.51	units	25	mm Hg
13004253	61	M	WHITE	113.8	183	Medicaid	English	WIDOWED	MICU	9.8	K/uL	4.77	m/uL	NULL	NULL	NULL	NULL	283	K/uL	12.4	g/dL	17.8	%	39.8	%	NULL	NULL	NULL	NULL	NULL	NULL	141	mEq/L	4.5	mEq/L	8.9	mg/dL	104	mEq/L	95	mg/dL	NULL	NULL	13	mEq/L	7.37	units	46	mm Hg
13011127	57	F	NATIVE HAWAIIAN OR OTHER PACIFIC ISLANDER	100	NULL	Medicare	English	NULL	MICU	16.48	K/uL	3.28	m/uL	12.6	K/uL	3.42	K/uL	180.75	K/uL	11	g/dL	13.83	%	36.98	%	NULL	NULL	NULL	NULL	NULL	NULL	134.67	mEq/L	4.73	mEq/L	7.47	mg/dL	90	mEq/L	648.67	mg/dL	NULL	NULL	28.67	mEq/L	7.02	units	70.67	mm Hg
13013944	65	M	WHITE	78.9	NULL	Medicaid	English	SINGLE	SICU	6.5	K/uL	3.06	m/uL	4.33	K/uL	0.79	K/uL	160.5	K/uL	9.55	g/dL	14.1	%	29.75	%	NULL	NULL	NULL	NULL	NULL	NULL	140	mEq/L	3.9	mEq/L	NULL	NULL	99	mEq/L	92	mg/dL	NULL	NULL	13	mEq/L	7.34	units	60	mm Hg
13017716	70	M	WHITE	91.1	NULL	Medicare	English	MARRIED	MICU	6.53	K/uL	2.85	m/uL	5.48	K/uL	1.41	K/uL	81.67	K/uL	8.33	g/dL	20	%	29.5	%	3.1	g/dL	NULL	NULL	NULL	NULL	142	mEq/L	5.13	mEq/L	7.47	mg/dL	102.33	mEq/L	158	mg/dL	NULL	NULL	22	mEq/L	7.19	units	41.5	mm Hg
13022039	85	F	WHITE - OTHER EUROPEAN	51	NULL	Medicare	Other	WIDOWED	MICU/SICU	9.8	K/uL	3.58	m/uL	NULL	NULL	NULL	NULL	159	K/uL	11.07	g/dL	13.93	%	35.33	%	NULL	NULL	NULL	NULL	NULL	NULL	133.67	mEq/L	4.8	mEq/L	8.83	mg/dL	96.67	mEq/L	105.67	mg/dL	NULL	NULL	15.67	mEq/L	7.39	units	43.67	mm Hg
13031833	76	M	UNKNOWN	89.5	174	Medicare	English	MARRIED	TSICU	14.1	K/uL	3.92	m/uL	NULL	NULL	NULL	NULL	183	K/uL	11.8	g/dL	14.5	%	35.9	%	NULL	NULL	NULL	NULL	NULL	NULL	136	mEq/L	4	mEq/L	9.4	mg/dL	95	mEq/L	100	mg/dL	NULL	NULL	13	mEq/L	NULL	NULL	NULL	NULL
13034309	70	F	WHITE	55	155	Medicare	English	MARRIED	TSICU	9.27	K/uL	3.55	m/uL	6.5	K/uL	1.1	K/uL	126.33	K/uL	11.1	g/dL	15.48	%	35.22	%	NULL	NULL	NULL	NULL	NULL	NULL	140.6	mEq/L	5.16	mEq/L	8.02	mg/dL	107.4	mEq/L	164.6	mg/dL	NULL	NULL	17.6	mEq/L	7.18	units	42	mm Hg
13038869	86	M	UNKNOWN	84.0667	173	Medicare	English	NULL	Neuro Intermediate	14.3	K/uL	4.21	m/uL	NULL	NULL	NULL	NULL	257.67	K/uL	12.23	g/dL	14.07	%	38.37	%	3.9	g/dL	NULL	NULL	NULL	NULL	139.33	mEq/L	3.87	mEq/L	8.93	mg/dL	100.67	mEq/L	151	mg/dL	NULL	NULL	16	mEq/L	7.43	units	28.5	mm Hg
13042136	83	M	WHITE	75.8	NULL	Medicare	English	MARRIED	TSICU	8.2	K/uL	3.1	m/uL	NULL	NULL	NULL	NULL	132	K/uL	9.4	g/dL	16.8	%	30.92	%	NULL	NULL	NULL	NULL	NULL	NULL	138	mEq/L	4.2	mEq/L	7.5	mg/dL	107	mEq/L	137	mg/dL	NULL	NULL	13	mEq/L	7.34	units	35	mm Hg
13046415	75	F	WHITE	48.1	165	Medicare	English	SINGLE	CVICU	5.88	K/uL	2.95	m/uL	NULL	NULL	NULL	NULL	204	K/uL	7.88	g/dL	13.78	%	26	%	NULL	NULL	NULL	NULL	NULL	NULL	144.25	mEq/L	3.55	mEq/L	7.67	mg/dL	117	mEq/L	145.33	mg/dL	NULL	NULL	12	mEq/L	NULL	NULL	NULL	NULL
13046589	71	F	WHITE	50	NULL	Medicaid	English	WIDOWED	SICU	11.67	K/uL	4.47	m/uL	NULL	NULL	NULL	NULL	170.67	K/uL	13.03	g/dL	14.63	%	39.06	%	NULL	NULL	NULL	NULL	NULL	NULL	142	mEq/L	4.15	mEq/L	8.3	mg/dL	99.5	mEq/L	87	mg/dL	NULL	NULL	11	mEq/L	7.3	units	NULL	NULL
13047349	66	F	WHITE	64	163	Medicare	English	SINGLE	MICU/SICU	8.6	K/uL	3.07	m/uL	6.51	K/uL	1.26	K/uL	256	K/uL	9.1	g/dL	14.5	%	29	%	1.9	g/dL	NULL	NULL	NULL	NULL	141	mEq/L	3.8	mEq/L	7.35	mg/dL	106	mEq/L	165	mg/dL	NULL	NULL	11	mEq/L	7.38	units	46	mm Hg
13056450	65	M	WHITE	46.8	170	Medicare	English	SINGLE	MICU/SICU	12.65	K/uL	1.94	m/uL	NULL	NULL	NULL	NULL	473.5	K/uL	6.15	g/dL	15.28	%	19.88	%	1.9	g/dL	NULL	NULL	NULL	NULL	140	mEq/L	4.55	mEq/L	8.8	mg/dL	102.5	mEq/L	152.5	mg/dL	NULL	NULL	12	mEq/L	7.29	units	58.5	mm Hg
13056496	65	F	WHITE - OTHER EUROPEAN	59.8	163	Private	English	MARRIED	CCU	15.28	K/uL	2.41	m/uL	NULL	NULL	NULL	NULL	158.5	K/uL	7.18	g/dL	18.53	%	24.25	%	NULL	NULL	NULL	NULL	NULL	NULL	132.33	mEq/L	5.63	mEq/L	8.5	mg/dL	90.33	mEq/L	72.33	mg/dL	NULL	NULL	25.67	mEq/L	7.16	units	52	mm Hg
13058662	80	M	WHITE	66.4	NULL	Private	English	MARRIED	Neuro Intermediate	5.4	K/uL	3.28	m/uL	NULL	NULL	NULL	NULL	282	K/uL	9.9	g/dL	12.8	%	29.9	%	NULL	NULL	NULL	NULL	NULL	NULL	139	mEq/L	3.8	mEq/L	8.7	mg/dL	109	mEq/L	76	mg/dL	5.2	%	7	mEq/L	NULL	NULL	NULL	NULL
13067297	80	F	WHITE - OTHER EUROPEAN	57	160	Medicare	English	DIVORCED	CVICU	8.38	K/uL	3.2	m/uL	5.04	K/uL	1.26	K/uL	139.6	K/uL	9.42	g/dL	15.26	%	30.37	%	NULL	NULL	NULL	NULL	NULL	NULL	141	mEq/L	4.3	mEq/L	7.9	mg/dL	111	mEq/L	117	mg/dL	NULL	NULL	13	mEq/L	7.37	units	38.6	mm Hg
13073326	69	M	WHITE	118	183	Medicare	English	SINGLE	SICU	9.55	K/uL	3.1	m/uL	NULL	NULL	NULL	NULL	290	K/uL	10.55	g/dL	15.85	%	32.25	%	NULL	NULL	NULL	NULL	NULL	NULL	139.5	mEq/L	4.1	mEq/L	7.4	mg/dL	106.5	mEq/L	101.5	mg/dL	NULL	NULL	14	mEq/L	7.27	units	45	mm Hg
13079902	86	M	WHITE	70	175	Medicare	English	MARRIED	CVICU	24.43	K/uL	3.57	m/uL	15.93	K/uL	2.26	K/uL	130	K/uL	10.03	g/dL	14.63	%	30.35	%	NULL	NULL	NULL	NULL	NULL	NULL	136	mEq/L	4.75	mEq/L	8.2	mg/dL	108	mEq/L	60	mg/dL	NULL	NULL	13	mEq/L	7.4	units	38.33	mm Hg
13082930	66	M	WHITE	109.1	NULL	Medicare	English	MARRIED	CCU	12.5	K/uL	2.61	m/uL	NULL	NULL	NULL	NULL	83.5	K/uL	7.35	g/dL	23.15	%	23.85	%	2.45	g/dL	NULL	NULL	NULL	NULL	136.67	mEq/L	3.93	mEq/L	7.8	mg/dL	96.67	mEq/L	145.33	mg/dL	NULL	NULL	12.33	mEq/L	7.36	units	59	mm Hg
13084414	76	F	WHITE	69.3	163	Medicare	English	WIDOWED	MICU	16.2	K/uL	4.02	m/uL	NULL	NULL	NULL	NULL	212	K/uL	12.1	g/dL	14	%	37.1	%	NULL	NULL	NULL	NULL	NULL	NULL	140	mEq/L	3.8	mEq/L	8.55	mg/dL	103	mEq/L	121.5	mg/dL	NULL	NULL	14	mEq/L	7.37	units	47	mm Hg
13084641	64	F	WHITE	56.6	150	Private	English	MARRIED	MICU	NULL	NULL	NULL	NULL	NULL	NULL	NULL	NULL	NULL	NULL	NULL	NULL	NULL	NULL	NULL	NULL	NULL	NULL	NULL	NULL	NULL	NULL	136	mEq/L	4.7	mEq/L	8.4	mg/dL	107	mEq/L	185	mg/dL	NULL	NULL	14	mEq/L	7.25	units	48.4	mm Hg
13087430	64	F	WHITE	57.6	NULL	Private	English	SINGLE	TSICU	11.9	K/uL	3.33	m/uL	NULL	NULL	NULL	NULL	196.67	K/uL	11.07	g/dL	15.57	%	32.53	%	NULL	NULL	NULL	NULL	NULL	NULL	138.67	mEq/L	3.27	mEq/L	8.13	mg/dL	103	mEq/L	115	mg/dL	NULL	NULL	10.67	mEq/L	7.38	units	41	mm Hg
13096912	69	M	WHITE	86	NULL	Medicare	English	WIDOWED	MICU	15.15	K/uL	3.57	m/uL	NULL	NULL	NULL	NULL	199.25	K/uL	9.73	g/dL	17.5	%	30.43	%	NULL	NULL	NULL	NULL	NULL	NULL	135.75	mEq/L	5.25	mEq/L	8.58	mg/dL	101.75	mEq/L	128.75	mg/dL	NULL	NULL	22.5	mEq/L	7.31	units	36	mm Hg
13104415	68	F	WHITE	58.1	NULL	Medicare	English	DIVORCED	Neuro Intermediate	4.9	K/uL	3.48	m/uL	NULL	NULL	NULL	NULL	139	K/uL	10.7	g/dL	13.9	%	32.4	%	NULL	NULL	NULL	NULL	NULL	NULL	143	mEq/L	3.9	mEq/L	7.9	mg/dL	115	mEq/L	108	mg/dL	NULL	NULL	8	mEq/L	NULL	NULL	NULL	NULL
13107573	66	M	WHITE	67.2	175	Medicare	English	MARRIED	MICU	14.3	K/uL	3.58	m/uL	NULL	NULL	NULL	NULL	245	K/uL	11.6	g/dL	12.7	%	34.7	%	NULL	NULL	NULL	NULL	NULL	NULL	140	mEq/L	4	mEq/L	9	mg/dL	104	mEq/L	127	mg/dL	NULL	NULL	11	mEq/L	NULL	NULL	NULL	NULL
13113830	92	M	WHITE	57.1	NULL	Medicare	English	WIDOWED	MICU/SICU	13	K/uL	2.86	m/uL	NULL	NULL	NULL	NULL	403	K/uL	6.8	g/dL	16.9	%	22.2	%	NULL	NULL	NULL	NULL	NULL	NULL	141	mEq/L	4.1	mEq/L	8.8	mg/dL	112	mEq/L	75	mg/dL	NULL	NULL	18	mEq/L	NULL	NULL	NULL	NULL
13115784	78	F	UNKNOWN	54.5	173	Medicare	English	NULL	CVICU	20.45	K/uL	3.5	m/uL	17.84	K/uL	2.37	K/uL	138.5	K/uL	9.4	g/dL	15.95	%	27.35	%	NULL	NULL	NULL	NULL	NULL	NULL	137	mEq/L	5.18	mEq/L	7.7	mg/dL	100	mEq/L	NULL	NULL	NULL	NULL	10	mEq/L	7.44	units	41	mm Hg
13117994	63	F	WHITE	72.8	160	Medicaid	English	MARRIED	CVICU	17.67	K/uL	3.08	m/uL	13.7	K/uL	1.56	K/uL	189.33	K/uL	9.1	g/dL	13.23	%	27.2	%	NULL	NULL	NULL	NULL	NULL	NULL	136	mEq/L	4.3	mEq/L	NULL	NULL	106.5	mEq/L	99	mg/dL	NULL	NULL	9.5	mEq/L	7.38	units	36.38	mm Hg
13122104	80	M	BLACK/AFRICAN	90	NULL	Medicare	English	MARRIED	CVICU	8.6	K/uL	3.67	m/uL	5.76	K/uL	1.15	K/uL	327.5	K/uL	10.65	g/dL	16.5	%	31.75	%	NULL	NULL	NULL	NULL	NULL	NULL	130.33	mEq/L	3.97	mEq/L	8.33	mg/dL	92.33	mEq/L	130.33	mg/dL	NULL	NULL	18.67	mEq/L	7.48	units	33	mm Hg
13122881	82	M	BLACK/AFRICAN AMERICAN	67.3	NULL	Medicare	English	MARRIED	SICU	5.2	K/uL	3.72	m/uL	NULL	NULL	NULL	NULL	111	K/uL	11.4	g/dL	15.9	%	35.9	%	NULL	NULL	NULL	NULL	NULL	NULL	135	mEq/L	4.5	mEq/L	9.2	mg/dL	92	mEq/L	84	mg/dL	NULL	NULL	16	mEq/L	NULL	NULL	NULL	NULL
13126465	55	F	WHITE	54.5	NULL	Private	English	MARRIED	Neuro Intermediate	NULL	NULL	NULL	NULL	NULL	NULL	NULL	NULL	NULL	NULL	NULL	NULL	NULL	NULL	NULL	NULL	NULL	NULL	NULL	NULL	NULL	NULL	NULL	NULL	NULL	NULL	NULL	NULL	NULL	NULL	NULL	NULL	NULL	NULL	NULL	NULL	NULL	NULL	NULL	NULL
13126529	83	M	WHITE	78.5	168	Medicare	English	SINGLE	CCU	5.1	K/uL	3.71	m/uL	4.44	K/uL	0.1	K/uL	349	K/uL	7.4	g/dL	15.6	%	30	%	NULL	NULL	NULL	NULL	NULL	NULL	139	mEq/L	5.8	mEq/L	9.2	mg/dL	98	mEq/L	155	mg/dL	NULL	NULL	11	mEq/L	7.24	units	88.33	mm Hg
13131638	81	F	WHITE	58.4	NULL	Medicare	English	SINGLE	MICU/SICU	1.45	K/uL	2.89	m/uL	1.32	K/uL	0.06	K/uL	40	K/uL	9.15	g/dL	17.55	%	27.55	%	NULL	NULL	NULL	NULL	NULL	NULL	139	mEq/L	3.65	mEq/L	7.95	mg/dL	109	mEq/L	92.5	mg/dL	NULL	NULL	16	mEq/L	NULL	NULL	NULL	NULL
13135546	91	F	WHITE	73.3	155	Medicare	English	SINGLE	CCU	11	K/uL	3	m/uL	NULL	NULL	NULL	NULL	411.67	K/uL	6.93	g/dL	25.7	%	23.03	%	NULL	NULL	NULL	NULL	NULL	NULL	137	mEq/L	5.7	mEq/L	8.7	mg/dL	99	mEq/L	128	mg/dL	NULL	NULL	18	mEq/L	7.25	units	49	mm Hg
13135665	79	F	WHITE	61.6	147	Medicare	English	WIDOWED	MICU/SICU	15.33	K/uL	4.21	m/uL	NULL	NULL	NULL	NULL	171.17	K/uL	12.25	g/dL	18.8	%	37.7	%	NULL	NULL	NULL	NULL	NULL	NULL	139	mEq/L	3.9	mEq/L	7.9	mg/dL	110	mEq/L	150	mg/dL	NULL	NULL	10	mEq/L	7.3	units	50.75	mm Hg
13138359	74	F	WHITE	75.3	NULL	Medicare	English	WIDOWED	MICU	15.1	K/uL	2.72	m/uL	13.89	K/uL	0.3	K/uL	190	K/uL	8.6	g/dL	15.2	%	27.4	%	2.7	g/dL	NULL	NULL	NULL	NULL	144	mEq/L	3.9	mEq/L	9.1	mg/dL	111	mEq/L	106	mg/dL	NULL	NULL	15	mEq/L	7.28	units	NULL	NULL
13141418	56	M	WHITE	109	170	Medicare	English	DIVORCED	MICU	18.1	K/uL	2.42	m/uL	16.59	K/uL	0.63	K/uL	89	K/uL	8.65	g/dL	19.4	%	28.4	%	2	g/dL	NULL	NULL	NULL	NULL	131	mEq/L	3.6	mEq/L	8.7	mg/dL	83	mEq/L	122	mg/dL	NULL	NULL	42	mEq/L	6.9	units	43.5	mm Hg
13146633	65	M	WHITE	92	173	Private	English	MARRIED	MICU	14.5	K/uL	2.89	m/uL	13.11	K/uL	1.26	K/uL	258	K/uL	8.7	g/dL	15.9	%	30.03	%	NULL	NULL	NULL	NULL	NULL	NULL	147.25	mEq/L	3.78	mEq/L	8.77	mg/dL	98.75	mEq/L	144.25	mg/dL	NULL	NULL	11.25	mEq/L	7.39	units	69.75	mm Hg
13156268	87	M	UNKNOWN	91	NULL	Medicare	English	NULL	TSICU	11.98	K/uL	3.35	m/uL	NULL	NULL	NULL	NULL	153.25	K/uL	10.58	g/dL	14.43	%	33	%	NULL	NULL	NULL	NULL	NULL	NULL	136	mEq/L	4.83	mEq/L	8	mg/dL	100.33	mEq/L	226.33	mg/dL	NULL	NULL	13.33	mEq/L	7.34	units	44	mm Hg
13158454	76	F	BLACK/AFRICAN AMERICAN	64.1	NULL	Medicaid	English	SINGLE	MICU	3.45	K/uL	2.23	m/uL	NULL	NULL	NULL	NULL	47	K/uL	7.8	g/dL	20.35	%	24.7	%	NULL	NULL	NULL	NULL	NULL	NULL	128.5	mEq/L	4.7	mEq/L	7.95	mg/dL	92	mEq/L	91	mg/dL	NULL	NULL	14.5	mEq/L	7.22	units	55	mm Hg
13160923	59	M	UNKNOWN	84.7	NULL	Private	English	NULL	CCU	11.4	K/uL	2.29	m/uL	NULL	NULL	NULL	NULL	18.67	K/uL	7.2	g/dL	19.97	%	22	%	3.7	g/dL	NULL	NULL	NULL	NULL	138	mEq/L	4.35	mEq/L	8.55	mg/dL	102.5	mEq/L	135.5	mg/dL	NULL	NULL	19	mEq/L	7.27	units	49.5	mm Hg
13162579	71	F	WHITE	71.3	NULL	Medicare	English	SINGLE	MICU	3.3	K/uL	3.68	m/uL	NULL	NULL	NULL	NULL	362	K/uL	8.25	g/dL	18.1	%	27.35	%	NULL	NULL	NULL	NULL	NULL	NULL	137	mEq/L	4.3	mEq/L	8.7	mg/dL	101	mEq/L	103	mg/dL	NULL	NULL	11	mEq/L	NULL	NULL	NULL	NULL
13163873	82	F	UNKNOWN	63.6	157	Medicare	English	DIVORCED	MICU/SICU	4.85	K/uL	3.83	m/uL	3.76	K/uL	0.62	K/uL	113.5	K/uL	11.9	g/dL	13.95	%	35.9	%	2.9	g/dL	NULL	NULL	NULL	NULL	144.33	mEq/L	3.63	mEq/L	8.23	mg/dL	114.33	mEq/L	103.67	mg/dL	NULL	NULL	15.67	mEq/L	7.38	units	32.8	mm Hg
13173963	80	F	WHITE	55.7	NULL	Medicare	English	WIDOWED	Neuro Intermediate	6.7	K/uL	3.43	m/uL	NULL	NULL	NULL	NULL	206	K/uL	10.15	g/dL	13.35	%	31.43	%	NULL	NULL	NULL	NULL	NULL	NULL	144.5	mEq/L	3.95	mEq/L	7.8	mg/dL	111	mEq/L	102	mg/dL	NULL	NULL	12	mEq/L	NULL	NULL	NULL	NULL
13176758	53	F	WHITE - OTHER EUROPEAN	109.4	173	Private	English	MARRIED	MICU	7.3	K/uL	4.39	m/uL	5.8	K/uL	1.04	K/uL	249	K/uL	12.8	g/dL	12.8	%	39.9	%	NULL	NULL	NULL	NULL	NULL	NULL	144	mEq/L	4.3	mEq/L	9.2	mg/dL	107	mEq/L	141	mg/dL	NULL	NULL	16	mEq/L	NULL	NULL	NULL	NULL
13177098	77	M	UNKNOWN	56.7	NULL	Medicare	English	NULL	MICU/SICU	4.1	K/uL	3.51	m/uL	NULL	NULL	NULL	NULL	355	K/uL	10.4	g/dL	15.7	%	30.8	%	3.4	g/dL	NULL	NULL	NULL	NULL	144	mEq/L	3.55	mEq/L	9.5	mg/dL	99.5	mEq/L	114	mg/dL	NULL	NULL	17.5	mEq/L	7.51	units	39	mm Hg
13177185	77	M	WHITE	63	NULL	Medicaid	English	SINGLE	Neuro Intermediate	18.95	K/uL	3.71	m/uL	NULL	NULL	NULL	NULL	335.5	K/uL	11.35	g/dL	13.3	%	33.6	%	NULL	NULL	NULL	NULL	NULL	NULL	136	mEq/L	4.85	mEq/L	8.6	mg/dL	102	mEq/L	126.5	mg/dL	6.3	%	8.5	mEq/L	NULL	NULL	NULL	NULL
13178807	87	F	UNKNOWN	55.4	NULL	Medicare	English	NULL	TSICU	4.05	K/uL	2.34	m/uL	NULL	NULL	NULL	NULL	222.75	K/uL	7.4	g/dL	13.55	%	24.05	%	NULL	NULL	NULL	NULL	NULL	NULL	137.5	mEq/L	4	mEq/L	9.3	mg/dL	103.5	mEq/L	88	mg/dL	NULL	NULL	9.5	mEq/L	NULL	NULL	NULL	NULL
13180830	73	M	WHITE	96	170	Medicare	English	MARRIED	CVICU	18.47	K/uL	2.86	m/uL	13.04	K/uL	2.87	K/uL	165	K/uL	8.97	g/dL	13.27	%	27.18	%	NULL	NULL	NULL	NULL	NULL	NULL	140	mEq/L	4.4	mEq/L	7.6	mg/dL	108	mEq/L	109	mg/dL	NULL	NULL	11	mEq/L	7.33	units	47.1	mm Hg
13182427	69	F	UNABLE TO OBTAIN	49.5	NULL	Medicare	English	SINGLE	SICU	9.05	K/uL	3.03	m/uL	NULL	NULL	NULL	NULL	275.5	K/uL	9.65	g/dL	15.8	%	30.7	%	NULL	NULL	NULL	NULL	NULL	NULL	141.5	mEq/L	3.95	mEq/L	7.9	mg/dL	106.5	mEq/L	116.5	mg/dL	NULL	NULL	13.5	mEq/L	7.35	units	38.5	mm Hg
13182835	77	M	WHITE	141.45	175	Medicare	English	MARRIED	MICU/SICU	14.5	K/uL	3.32	m/uL	NULL	NULL	NULL	NULL	377.75	K/uL	9.88	g/dL	16.85	%	31	%	3.4	g/dL	NULL	NULL	NULL	NULL	138	mEq/L	5.05	mEq/L	7.43	mg/dL	100.75	mEq/L	81	mg/dL	NULL	NULL	19.5	mEq/L	7.2	units	66.5	mm Hg
13187416	64	M	UNKNOWN	59	NULL	Medicare	English	NULL	TSICU	6.33	K/uL	3.25	m/uL	NULL	NULL	NULL	NULL	168.25	K/uL	10.55	g/dL	13.15	%	31.4	%	NULL	NULL	NULL	NULL	NULL	NULL	140	mEq/L	3.8	mEq/L	8.5	mg/dL	105	mEq/L	102	mg/dL	NULL	NULL	10	mEq/L	NULL	NULL	NULL	NULL
13187609	89	F	UNKNOWN	48.1333	NULL	Medicare	English	NULL	MICU	30.1	K/uL	4.54	m/uL	26.04	K/uL	0.7	K/uL	179.33	K/uL	10.2	g/dL	18.8	%	34.3	%	2.45	g/dL	4	g/dL	6.5	g/dL	132.67	mEq/L	4.23	mEq/L	8.77	mg/dL	93.33	mEq/L	127	mg/dL	NULL	NULL	15	mEq/L	7.4	units	54.75	mm Hg
13188974	69	M	WHITE	58.7	183	Medicare	English	SINGLE	MICU	13.3	K/uL	3.31	m/uL	NULL	NULL	NULL	NULL	244	K/uL	9.2	g/dL	16.6	%	32	%	2.3	g/dL	NULL	NULL	NULL	NULL	145	mEq/L	4.4	mEq/L	9.1	mg/dL	104	mEq/L	68	mg/dL	NULL	NULL	20	mEq/L	7.32	units	59.75	mm Hg
13194772	74	F	WHITE	73	163	Medicare	English	DIVORCED	TSICU	9.8	K/uL	3.66	m/uL	NULL	NULL	NULL	NULL	220	K/uL	10.2	g/dL	13.2	%	32.5	%	NULL	NULL	NULL	NULL	NULL	NULL	137	mEq/L	3.7	mEq/L	8.7	mg/dL	103	mEq/L	128	mg/dL	NULL	NULL	8	mEq/L	7.45	units	38	mm Hg
13196093	75	F	WHITE	62.2	NULL	Medicare	English	MARRIED	SICU	18.45	K/uL	3.53	m/uL	NULL	NULL	NULL	NULL	150.5	K/uL	11.1	g/dL	17	%	35.75	%	NULL	NULL	NULL	NULL	NULL	NULL	141.75	mEq/L	3.9	mEq/L	8.4	mg/dL	102.75	mEq/L	134.75	mg/dL	NULL	NULL	16	mEq/L	7.42	units	44.25	mm Hg
13196236	88	M	WHITE	51.7	175	Other	English	MARRIED	SICU	19.15	K/uL	3.07	m/uL	18.28	K/uL	0.44	K/uL	125	K/uL	9.3	g/dL	15.3	%	27.97	%	2.4	g/dL	NULL	NULL	NULL	NULL	145	mEq/L	4.1	mEq/L	7.6	mg/dL	112.5	mEq/L	131.5	mg/dL	NULL	NULL	10.5	mEq/L	7.37	units	41	mm Hg
13198542	42	M	WHITE	113.3	NULL	Medicare	English	MARRIED	MICU/SICU	13.4	K/uL	3.04	m/uL	8.71	K/uL	2.68	K/uL	806	K/uL	8.2	g/dL	18.8	%	28.6	%	3.7	g/dL	NULL	NULL	NULL	NULL	138.5	mEq/L	4.25	mEq/L	9	mg/dL	91.5	mEq/L	179.5	mg/dL	NULL	NULL	15	mEq/L	7.33	units	76.67	mm Hg
13204076	55	F	WHITE	131.2	157	Medicare	English	MARRIED	TSICU	14.3	K/uL	4.25	m/uL	NULL	NULL	NULL	NULL	205	K/uL	11.45	g/dL	14.1	%	38.2	%	NULL	NULL	NULL	NULL	NULL	NULL	137	mEq/L	6.7	mEq/L	8.1	mg/dL	102	mEq/L	130	mg/dL	NULL	NULL	19	mEq/L	NULL	NULL	NULL	NULL
13205532	63	M	UNKNOWN	66.4	NULL	Medicare	English	MARRIED	TSICU	13.55	K/uL	3.65	m/uL	11.67	K/uL	0.77	K/uL	345	K/uL	9.95	g/dL	19.75	%	30.65	%	NULL	NULL	NULL	NULL	NULL	NULL	135.5	mEq/L	4.1	mEq/L	8.1	mg/dL	102	mEq/L	100.5	mg/dL	NULL	NULL	11.5	mEq/L	7.33	units	48	mm Hg
13210948	68	F	WHITE	54.6	NULL	Medicare	English	WIDOWED	MICU	18.7	K/uL	2.54	m/uL	NULL	NULL	NULL	NULL	600	K/uL	7.8	g/dL	16.1	%	24.5	%	NULL	NULL	NULL	NULL	NULL	NULL	140	mEq/L	4.1	mEq/L	7.5	mg/dL	105	mEq/L	95	mg/dL	NULL	NULL	10	mEq/L	NULL	NULL	NULL	NULL
13213946	64	F	WHITE	62.6	NULL	Medicaid	English	MARRIED	TSICU	17.1	K/uL	3.11	m/uL	13.41	K/uL	1.46	K/uL	479	K/uL	8.03	g/dL	13.73	%	26.43	%	NULL	NULL	NULL	NULL	NULL	NULL	136.67	mEq/L	4.93	mEq/L	8	mg/dL	104.33	mEq/L	126.67	mg/dL	NULL	NULL	10.33	mEq/L	7.39	units	39.67	mm Hg
13223929	67	M	UNABLE TO OBTAIN	101	178	Medicare	English	SINGLE	MICU/SICU	25.45	K/uL	4.32	m/uL	24.03	K/uL	0.27	K/uL	218.5	K/uL	12.75	g/dL	15.75	%	40	%	2.9	g/dL	NULL	NULL	NULL	NULL	144	mEq/L	4.8	mEq/L	8.85	mg/dL	108	mEq/L	107.5	mg/dL	NULL	NULL	8	mEq/L	7.37	units	55.5	mm Hg
13224784	63	F	WHITE	68	160	Medicaid	English	DIVORCED	TSICU	10.36	K/uL	2.55	m/uL	NULL	NULL	NULL	NULL	48.8	K/uL	7.56	g/dL	14.96	%	23.7	%	2.6	g/dL	NULL	NULL	NULL	NULL	141	mEq/L	3.98	mEq/L	9.48	mg/dL	96.2	mEq/L	133.2	mg/dL	NULL	NULL	25.4	mEq/L	7.14	units	53.88	mm Hg
13229795	69	F	WHITE	52	163	Medicare	English	MARRIED	SICU	15.98	K/uL	2.76	m/uL	NULL	NULL	NULL	NULL	161	K/uL	8.65	g/dL	22.08	%	25.35	%	2.2	g/dL	NULL	NULL	NULL	NULL	131.33	mEq/L	3.87	mEq/L	6.43	mg/dL	98.67	mEq/L	77.33	mg/dL	NULL	NULL	13.33	mEq/L	7.37	units	36	mm Hg
13232661	63	M	BLACK/AFRICAN AMERICAN	106.4	178	Other	English	MARRIED	MICU	17.6	K/uL	5.81	m/uL	NULL	NULL	NULL	NULL	255.5	K/uL	13.5	g/dL	21.95	%	44.35	%	NULL	NULL	NULL	NULL	NULL	NULL	137.67	mEq/L	4.63	mEq/L	9.45	mg/dL	104	mEq/L	191	mg/dL	NULL	NULL	15.33	mEq/L	7.34	units	40	mm Hg
13236112	83	F	UNKNOWN	76.5	160	Medicare	English	NULL	Neuro SICU	9	K/uL	3.74	m/uL	NULL	NULL	NULL	NULL	171	K/uL	10.9	g/dL	14.3	%	33.4	%	NULL	NULL	NULL	NULL	NULL	NULL	137	mEq/L	3.5	mEq/L	8.2	mg/dL	106	mEq/L	131	mg/dL	NULL	NULL	10	mEq/L	7.45	units	32	mm Hg
13237459	75	M	WHITE	54.2	180	Medicare	English	SINGLE	MICU	8.13	K/uL	4.31	m/uL	5.75	K/uL	0.27	K/uL	66.33	K/uL	12.78	g/dL	15.3	%	42.9	%	2.9	g/dL	NULL	NULL	NULL	NULL	137.5	mEq/L	4.3	mEq/L	8.25	mg/dL	100.75	mEq/L	93.5	mg/dL	NULL	NULL	13.75	mEq/L	7.33	units	54.4	mm Hg
13238503	67	M	WHITE	87.35	191	Medicare	English	MARRIED	CVICU	12.93	K/uL	3.05	m/uL	10.15	K/uL	3.88	K/uL	157.5	K/uL	9.93	g/dL	12.4	%	29.75	%	NULL	NULL	NULL	NULL	NULL	NULL	138	mEq/L	4	mEq/L	7.7	mg/dL	106	mEq/L	103.5	mg/dL	NULL	NULL	8.33	mEq/L	7.31	units	49.25	mm Hg
13241760	85	M	UNKNOWN	92.7	178	Medicare	English	SINGLE	MICU	14.95	K/uL	3.51	m/uL	NULL	NULL	NULL	NULL	260	K/uL	10.6	g/dL	14.7	%	30.3	%	NULL	NULL	NULL	NULL	NULL	NULL	130	mEq/L	4.6	mEq/L	7.7	mg/dL	99	mEq/L	180	mg/dL	NULL	NULL	22	mEq/L	7.3	units	34	mm Hg
13242029	71	F	WHITE - OTHER EUROPEAN	70	NULL	Medicaid	English	SINGLE	MICU	19.4	K/uL	3.06	m/uL	13.19	K/uL	5.82	K/uL	229	K/uL	8.5	g/dL	17	%	26.6	%	NULL	NULL	NULL	NULL	NULL	NULL	131	mEq/L	4.95	mEq/L	8.8	mg/dL	95.5	mEq/L	85.5	mg/dL	NULL	NULL	16	mEq/L	NULL	NULL	NULL	NULL
13248059	45	M	UNKNOWN	84.2	178	Medicaid	English	NULL	MICU	9	K/uL	4.66	m/uL	NULL	NULL	NULL	NULL	214	K/uL	13.3	g/dL	13.4	%	40.6	%	NULL	NULL	NULL	NULL	NULL	NULL	138	mEq/L	3.9	mEq/L	8.7	mg/dL	104	mEq/L	123	mg/dL	NULL	NULL	9	mEq/L	7.42	units	43	mm Hg
13249077	68	M	WHITE - RUSSIAN	146	175	Medicare	English	MARRIED	CCU	15.2	K/uL	3.73	m/uL	NULL	NULL	NULL	NULL	223	K/uL	9.6	g/dL	18.2	%	31.3	%	3.9	g/dL	NULL	NULL	NULL	NULL	133.5	mEq/L	3.9	mEq/L	11.05	mg/dL	89	mEq/L	145.5	mg/dL	NULL	NULL	14	mEq/L	7.34	units	59	mm Hg
13252148	85	M	UNKNOWN	73.1	NULL	Medicare	English	MARRIED	CCU	19.67	K/uL	3.32	m/uL	NULL	NULL	NULL	NULL	158	K/uL	9.97	g/dL	15.57	%	30.23	%	1.8	g/dL	NULL	NULL	NULL	NULL	141.33	mEq/L	5.2	mEq/L	7.43	mg/dL	110.67	mEq/L	127.67	mg/dL	NULL	NULL	13.67	mEq/L	7.23	units	54.5	mm Hg
13253226	92	M	WHITE	74.5	NULL	Medicare	English	MARRIED	MICU/SICU	7.7	K/uL	4.18	m/uL	NULL	NULL	NULL	NULL	136	K/uL	9	g/dL	19.9	%	29.4	%	NULL	NULL	NULL	NULL	NULL	NULL	134.67	mEq/L	4.1	mEq/L	8.35	mg/dL	99.67	mEq/L	118.67	mg/dL	NULL	NULL	12.33	mEq/L	7.4	units	47	mm Hg
13264818	61	F	WHITE	60.4	170	Private	English	NULL	TSICU	11.3	K/uL	2.49	m/uL	NULL	NULL	NULL	NULL	274	K/uL	9.1	g/dL	14.2	%	27.8	%	3.1	g/dL	NULL	NULL	NULL	NULL	132	mEq/L	4.3	mEq/L	8.4	mg/dL	102	mEq/L	105	mg/dL	NULL	NULL	7	mEq/L	7.28	units	49	mm Hg
13268471	75	M	WHITE	117.7	NULL	Medicare	English	MARRIED	SICU	14.4	K/uL	3.88	m/uL	NULL	NULL	NULL	NULL	266	K/uL	12	g/dL	15.8	%	37.7	%	NULL	NULL	NULL	NULL	NULL	NULL	137	mEq/L	4.8	mEq/L	8	mg/dL	104	mEq/L	104	mg/dL	NULL	NULL	12	mEq/L	7.27	units	60.67	mm Hg
13275089	84	F	UNABLE TO OBTAIN	72.2	NULL	Private	English	MARRIED	MICU	18	K/uL	3.31	m/uL	11.31	K/uL	4.62	K/uL	271	K/uL	9.8	g/dL	17.8	%	33.6	%	3.6	g/dL	NULL	NULL	NULL	NULL	138	mEq/L	4.1	mEq/L	9.9	mg/dL	97	mEq/L	175	mg/dL	NULL	NULL	14	mEq/L	7.4	units	55	mm Hg
13276225	69	F	WHITE	72	NULL	Medicare	English	WIDOWED	Neuro Intermediate	3.9	K/uL	3.5	m/uL	NULL	NULL	NULL	NULL	143	K/uL	10.3	g/dL	14.3	%	33	%	NULL	NULL	NULL	NULL	NULL	NULL	139	mEq/L	4.8	mEq/L	7.9	mg/dL	109	mEq/L	88	mg/dL	NULL	NULL	9	mEq/L	NULL	NULL	NULL	NULL
13276623	61	M	WHITE	73.4667	183	Medicaid	English	SINGLE	SICU	14.77	K/uL	2.7	m/uL	NULL	NULL	NULL	NULL	89.22	K/uL	9	g/dL	18.84	%	26	%	3.02	g/dL	NULL	NULL	NULL	NULL	141.17	mEq/L	4.12	mEq/L	9.48	mg/dL	104.83	mEq/L	173.67	mg/dL	NULL	NULL	10.5	mEq/L	7.33	units	42.88	mm Hg
13284221	85	F	WHITE	49.9	NULL	Medicare	English	SINGLE	Neuro SICU	NULL	NULL	NULL	NULL	NULL	NULL	NULL	NULL	NULL	NULL	NULL	NULL	NULL	NULL	NULL	NULL	NULL	NULL	NULL	NULL	NULL	NULL	134	mEq/L	5.4	mEq/L	NULL	NULL	101	mEq/L	210	mg/dL	NULL	NULL	16	mEq/L	7.36	units	32	mm Hg
13290209	92	M	UNKNOWN	79.4	NULL	Medicare	English	NULL	SICU	11.05	K/uL	5.89	m/uL	8.61	K/uL	1.03	K/uL	113	K/uL	11.9	g/dL	19.23	%	37.45	%	NULL	NULL	NULL	NULL	NULL	NULL	140	mEq/L	4.23	mEq/L	8.67	mg/dL	107.75	mEq/L	108	mg/dL	NULL	NULL	19.25	mEq/L	7.42	units	29	mm Hg
13293708	83	M	WHITE - OTHER EUROPEAN	82	NULL	Medicare	English	MARRIED	MICU	11.2	K/uL	2.96	m/uL	10.4	K/uL	1.09	K/uL	333.57	K/uL	8.3	g/dL	14.99	%	25.84	%	NULL	NULL	NULL	NULL	NULL	NULL	137.8	mEq/L	4.98	mEq/L	8.13	mg/dL	104	mEq/L	104.2	mg/dL	NULL	NULL	17	mEq/L	7.34	units	36	mm Hg
13294123	67	M	WHITE	68	NULL	Medicaid	English	DIVORCED	CCU	6.1	K/uL	2.79	m/uL	NULL	NULL	NULL	NULL	266	K/uL	8.4	g/dL	16.1	%	27.3	%	NULL	NULL	NULL	NULL	NULL	NULL	136	mEq/L	3.5	mEq/L	8.2	mg/dL	104	mEq/L	135	mg/dL	NULL	NULL	17	mEq/L	NULL	NULL	NULL	NULL
13294269	69	F	WHITE	119.5	157	Medicare	English	MARRIED	CVICU	10.53	K/uL	3.34	m/uL	6.12	K/uL	1.57	K/uL	130.67	K/uL	10.27	g/dL	15.7	%	32.18	%	NULL	NULL	NULL	NULL	NULL	NULL	137	mEq/L	5.2	mEq/L	NULL	NULL	107	mEq/L	162	mg/dL	NULL	NULL	13	mEq/L	7.35	units	46.78	mm Hg
13296779	51	M	BLACK/AFRICAN AMERICAN	87	NULL	Medicaid	English	SINGLE	MICU	9.83	K/uL	2.82	m/uL	NULL	NULL	NULL	NULL	245.33	K/uL	7.93	g/dL	19	%	25.3	%	NULL	NULL	NULL	NULL	NULL	NULL	135	mEq/L	5.7	mEq/L	8.9	mg/dL	97	mEq/L	95.5	mg/dL	NULL	NULL	16	mEq/L	7.43	units	37	mm Hg
13305921	75	F	WHITE - OTHER EUROPEAN	59.9	NULL	Medicare	English	WIDOWED	MICU/SICU	5.4	K/uL	3.09	m/uL	NULL	NULL	NULL	NULL	253	K/uL	8.5	g/dL	12.3	%	26.9	%	NULL	NULL	NULL	NULL	NULL	NULL	131	mEq/L	4.8	mEq/L	8.2	mg/dL	100	mEq/L	115	mg/dL	NULL	NULL	13	mEq/L	NULL	NULL	NULL	NULL
13310579	89	M	ASIAN - CHINESE	84	NULL	Medicaid	Chinese	MARRIED	MICU	28.9	K/uL	4.22	m/uL	26.1	K/uL	1.18	K/uL	157	K/uL	13	g/dL	13.6	%	40.8	%	2.8	g/dL	NULL	NULL	NULL	NULL	131	mEq/L	5.7	mEq/L	8.6	mg/dL	100	mEq/L	92	mg/dL	NULL	NULL	10	mEq/L	NULL	NULL	NULL	NULL
13313907	53	M	WHITE	92	NULL	Private	English	SINGLE	MICU/SICU	9.47	K/uL	3.22	m/uL	NULL	NULL	NULL	NULL	386.33	K/uL	7.5	g/dL	18.53	%	23.63	%	NULL	NULL	NULL	NULL	NULL	NULL	138	mEq/L	4.1	mEq/L	8.2	mg/dL	107	mEq/L	97	mg/dL	NULL	NULL	16	mEq/L	7.44	units	31	mm Hg
13325368	69	F	WHITE	88.5333	165	Medicare	English	NULL	MICU	9	K/uL	5.04	m/uL	7.85	K/uL	0.33	K/uL	151.67	K/uL	16.27	g/dL	14.03	%	52.63	%	3.55	g/dL	NULL	NULL	NULL	NULL	142.67	mEq/L	4.77	mEq/L	8.17	mg/dL	102.33	mEq/L	136.67	mg/dL	NULL	NULL	15.33	mEq/L	7.35	units	59.33	mm Hg
13325707	62	M	WHITE	59.3	178	Medicare	English	DIVORCED	MICU	9.72	K/uL	2.4	m/uL	9.37	K/uL	1.61	K/uL	63.4	K/uL	7.32	g/dL	15.32	%	22.3	%	2.6	g/dL	NULL	NULL	NULL	NULL	140	mEq/L	4.25	mEq/L	6.8	mg/dL	111.5	mEq/L	115	mg/dL	NULL	NULL	7	mEq/L	7.31	units	46	mm Hg
13326174	70	F	WHITE	52.7	157	Medicare	English	MARRIED	CVICU	7.25	K/uL	3.41	m/uL	5.64	K/uL	1.05	K/uL	223	K/uL	10.45	g/dL	15.25	%	32.05	%	NULL	NULL	NULL	NULL	NULL	NULL	137	mEq/L	4.25	mEq/L	8.45	mg/dL	108.5	mEq/L	107	mg/dL	NULL	NULL	14	mEq/L	NULL	NULL	NULL	NULL
13326903	92	F	WHITE - RUSSIAN	NULL	NULL	Medicare	Russian	WIDOWED	MICU/SICU	5.3	K/uL	3.77	m/uL	NULL	NULL	NULL	NULL	219	K/uL	12.1	g/dL	13.1	%	36	%	NULL	NULL	NULL	NULL	NULL	NULL	143	mEq/L	3.6	mEq/L	9.4	mg/dL	103	mEq/L	93	mg/dL	NULL	NULL	16	mEq/L	NULL	NULL	NULL	NULL
13328229	64	F	WHITE	116	168	Medicaid	English	SINGLE	CVICU	9.8	K/uL	4.27	m/uL	5.43	K/uL	3.65	K/uL	274.33	K/uL	12.7	g/dL	14.5	%	37.15	%	NULL	NULL	NULL	NULL	NULL	NULL	137	mEq/L	4.43	mEq/L	9.3	mg/dL	99	mEq/L	138	mg/dL	NULL	NULL	23	mEq/L	NULL	NULL	NULL	NULL
13328603	63	M	UNKNOWN	61.7	NULL	Private	English	NULL	MICU/SICU	20.4	K/uL	3.67	m/uL	18.92	K/uL	0.52	K/uL	29.33	K/uL	10.93	g/dL	14.03	%	31.97	%	3	g/dL	NULL	NULL	NULL	NULL	127.67	mEq/L	3.67	mEq/L	7.87	mg/dL	92.33	mEq/L	92.67	mg/dL	NULL	NULL	15	mEq/L	7.34	units	43	mm Hg
13334510	71	F	BLACK/AFRICAN AMERICAN	69	170	Medicaid	English	DIVORCED	CCU	21.85	K/uL	3.27	m/uL	NULL	NULL	NULL	NULL	124.5	K/uL	8.4	g/dL	15.55	%	27.25	%	NULL	NULL	NULL	NULL	NULL	NULL	135.5	mEq/L	5.3	mEq/L	9.4	mg/dL	104.5	mEq/L	116	mg/dL	NULL	NULL	16	mEq/L	7.4	units	23	mm Hg
13335105	77	M	BLACK/AFRICAN AMERICAN	95.3	170	Medicare	English	WIDOWED	MICU	5.2	K/uL	3.4	m/uL	NULL	NULL	NULL	NULL	102	K/uL	11	g/dL	12.8	%	33.1	%	NULL	NULL	NULL	NULL	NULL	NULL	134	mEq/L	4.9	mEq/L	8.2	mg/dL	97	mEq/L	143	mg/dL	NULL	NULL	14	mEq/L	7.3	units	57	mm Hg
13336411	62	F	WHITE	53.9	152	Medicare	English	MARRIED	MICU/SICU	35.7	K/uL	3.38	m/uL	NULL	NULL	NULL	NULL	624	K/uL	11.6	g/dL	13.5	%	35.2	%	3.8	g/dL	NULL	NULL	NULL	NULL	132.5	mEq/L	4.05	mEq/L	8.65	mg/dL	93.5	mEq/L	188.5	mg/dL	NULL	NULL	12.5	mEq/L	7.38	units	47	mm Hg
13341183	85	M	WHITE	87.3	171	Medicare	English	SINGLE	CCU	7.7	K/uL	3.96	m/uL	NULL	NULL	NULL	NULL	186	K/uL	11.5	g/dL	14.2	%	35.2	%	NULL	NULL	NULL	NULL	NULL	NULL	141	mEq/L	4.8	mEq/L	8.4	mg/dL	104	mEq/L	119	mg/dL	NULL	NULL	10	mEq/L	NULL	NULL	NULL	NULL
13342866	63	F	WHITE	102.9	NULL	Medicaid	English	MARRIED	MICU/SICU	35.8	K/uL	3.9	m/uL	NULL	NULL	NULL	NULL	313	K/uL	9.6	g/dL	16.9	%	31.5	%	3.2	g/dL	NULL	NULL	NULL	NULL	140	mEq/L	3.8	mEq/L	9.25	mg/dL	100	mEq/L	112.5	mg/dL	NULL	NULL	13	mEq/L	7.38	units	49	mm Hg
13347746	77	F	WHITE	99.5	140	Medicare	English	MARRIED	CCU	9.65	K/uL	2.84	m/uL	NULL	NULL	NULL	NULL	216.5	K/uL	9.6	g/dL	13.95	%	29.95	%	3.1	g/dL	NULL	NULL	NULL	NULL	135.5	mEq/L	4.6	mEq/L	8.65	mg/dL	103	mEq/L	104.5	mg/dL	NULL	NULL	12.5	mEq/L	NULL	NULL	NULL	NULL
13356983	82	M	ASIAN - SOUTH EAST ASIAN	6.5	163	Medicaid	Vietnamese	MARRIED	MICU/SICU	9.7	K/uL	2.71	m/uL	NULL	NULL	NULL	NULL	111.6	K/uL	8.1	g/dL	15.36	%	22.98	%	2.2	g/dL	NULL	NULL	NULL	NULL	136.67	mEq/L	3.77	mEq/L	6.87	mg/dL	107	mEq/L	108.67	mg/dL	5.2	%	12.33	mEq/L	7.43	units	NULL	NULL
13357548	71	F	WHITE	80.65	NULL	Other	English	MARRIED	MICU	10.1	K/uL	2.69	m/uL	8.59	K/uL	0.76	K/uL	224	K/uL	8.35	g/dL	15.1	%	26.1	%	NULL	NULL	NULL	NULL	NULL	NULL	132.75	mEq/L	5.43	mEq/L	8.1	mg/dL	103.5	mEq/L	173.75	mg/dL	NULL	NULL	13.75	mEq/L	7.32	units	32	mm Hg
13359278	68	F	WHITE	69	160	Medicare	English	MARRIED	Neuro Intermediate	NULL	NULL	NULL	NULL	NULL	NULL	NULL	NULL	NULL	NULL	NULL	NULL	NULL	NULL	NULL	NULL	NULL	NULL	NULL	NULL	NULL	NULL	NULL	NULL	NULL	NULL	NULL	NULL	NULL	NULL	NULL	NULL	NULL	NULL	NULL	NULL	NULL	NULL	NULL	NULL
13360143	51	F	WHITE	51	NULL	Private	English	MARRIED	MICU	20.65	K/uL	4.6	m/uL	13.16	K/uL	5.29	K/uL	279	K/uL	13.35	g/dL	12.7	%	40.55	%	NULL	NULL	NULL	NULL	NULL	NULL	138.5	mEq/L	4.1	mEq/L	8.65	mg/dL	102	mEq/L	130.5	mg/dL	NULL	NULL	15	mEq/L	NULL	NULL	NULL	NULL
13365499	82	F	UNABLE TO OBTAIN	87	163	Medicare	English	NULL	CVICU	NULL	NULL	NULL	NULL	NULL	NULL	NULL	NULL	NULL	NULL	NULL	NULL	NULL	NULL	NULL	NULL	NULL	NULL	NULL	NULL	NULL	NULL	NULL	NULL	NULL	NULL	NULL	NULL	NULL	NULL	NULL	NULL	NULL	NULL	NULL	NULL	NULL	NULL	NULL	NULL
13365907	92	M	WHITE	69.9	160	Medicare	English	WIDOWED	CCU	7.6	K/uL	2.94	m/uL	NULL	NULL	NULL	NULL	115.5	K/uL	9.8	g/dL	14.45	%	29	%	NULL	NULL	NULL	NULL	NULL	NULL	138	mEq/L	4.35	mEq/L	8.7	mg/dL	104.5	mEq/L	108	mg/dL	NULL	NULL	14.5	mEq/L	7.42	units	37.5	mm Hg
13370248	84	F	WHITE - OTHER EUROPEAN	41.5	147	Medicare	English	SINGLE	TSICU	11.83	K/uL	4.15	m/uL	NULL	NULL	NULL	NULL	158.5	K/uL	10.35	g/dL	21.8	%	31.33	%	NULL	NULL	NULL	NULL	NULL	NULL	141.75	mEq/L	3.93	mEq/L	7.2	mg/dL	111.75	mEq/L	119.5	mg/dL	NULL	NULL	18.25	mEq/L	7.31	units	24.67	mm Hg
13371651	69	F	WHITE	64	NULL	Medicare	English	WIDOWED	MICU/SICU	14.22	K/uL	2.9	m/uL	10.88	K/uL	0.72	K/uL	275.67	K/uL	9.18	g/dL	14.87	%	28.68	%	3.1	g/dL	NULL	NULL	NULL	NULL	140	mEq/L	3.7	mEq/L	7.4	mg/dL	110	mEq/L	103	mg/dL	NULL	NULL	13	mEq/L	NULL	NULL	NULL	NULL
13374896	67	F	WHITE	49	NULL	Medicare	English	WIDOWED	MICU	7.2	K/uL	3.75	m/uL	NULL	NULL	NULL	NULL	101	K/uL	10.5	g/dL	17.2	%	34.3	%	NULL	NULL	NULL	NULL	NULL	NULL	134	mEq/L	4.1	mEq/L	8.5	mg/dL	96	mEq/L	124	mg/dL	NULL	NULL	14	mEq/L	7.36	units	44	mm Hg
13380018	63	F	WHITE	75.6333	157	Medicaid	English	MARRIED	MICU/SICU	6.9	K/uL	3.19	m/uL	NULL	NULL	NULL	NULL	183	K/uL	7.4	g/dL	24	%	26.4	%	NULL	NULL	NULL	NULL	NULL	NULL	135	mEq/L	5.2	mEq/L	8.2	mg/dL	99	mEq/L	88	mg/dL	NULL	NULL	12	mEq/L	7.42	units	50	mm Hg
13381135	75	F	WHITE	69.7	160	Medicare	English	WIDOWED	MICU	14.37	K/uL	2.74	m/uL	10.27	K/uL	1.06	K/uL	99.67	K/uL	8.23	g/dL	16	%	23.28	%	2.35	g/dL	NULL	NULL	NULL	NULL	144	mEq/L	3.9	mEq/L	7.4	mg/dL	108.67	mEq/L	185.67	mg/dL	NULL	NULL	17.33	mEq/L	7.32	units	47	mm Hg
13381777	73	F	WHITE	90	163	Medicare	English	MARRIED	MICU/SICU	15.45	K/uL	4.24	m/uL	14.31	K/uL	0.33	K/uL	151.5	K/uL	12	g/dL	14.1	%	39.6	%	NULL	NULL	NULL	NULL	NULL	NULL	136.33	mEq/L	4.73	mEq/L	8.6	mg/dL	97.67	mEq/L	143.67	mg/dL	NULL	NULL	14	mEq/L	7.31	units	56	mm Hg
13382160	80	F	WHITE	65	163	Medicare	English	MARRIED	CCU	14.9	K/uL	4.16	m/uL	NULL	NULL	NULL	NULL	274	K/uL	11.5	g/dL	14.8	%	36.1	%	NULL	NULL	NULL	NULL	NULL	NULL	141	mEq/L	4.45	mEq/L	9.35	mg/dL	107	mEq/L	143.5	mg/dL	NULL	NULL	9.5	mEq/L	NULL	NULL	NULL	NULL
13385471	49	M	UNKNOWN	78.75	NULL	Medicaid	English	DIVORCED	TSICU	18.7	K/uL	4.32	m/uL	15.55	K/uL	0.75	K/uL	148	K/uL	13	g/dL	13.3	%	38.5	%	2.93	g/dL	NULL	NULL	NULL	NULL	127.33	mEq/L	3.23	mEq/L	7.77	mg/dL	86.33	mEq/L	86	mg/dL	NULL	NULL	15.33	mEq/L	7.49	units	40	mm Hg
13388705	80	M	WHITE	67	170	Medicare	English	MARRIED	CVICU	14.63	K/uL	2.73	m/uL	9.37	K/uL	2.3	K/uL	93.75	K/uL	9.7	g/dL	11.63	%	29.3	%	NULL	NULL	NULL	NULL	NULL	NULL	136	mEq/L	4.45	mEq/L	7.7	mg/dL	105.5	mEq/L	NULL	NULL	NULL	NULL	10.5	mEq/L	7.4	units	38.78	mm Hg
13396394	53	M	UNKNOWN	97.3	185	NULL	English	NULL	MICU	6.7	K/uL	4.36	m/uL	4.15	K/uL	1.3	K/uL	142	K/uL	10.95	g/dL	15.05	%	34.9	%	3	g/dL	NULL	NULL	NULL	NULL	146	mEq/L	6.05	mEq/L	7.63	mg/dL	113	mEq/L	118.5	mg/dL	NULL	NULL	17.17	mEq/L	7.31	units	36.5	mm Hg
13412848	99	F	BLACK/CAPE VERDEAN	62.9	NULL	Medicaid	Kabuverdianu	WIDOWED	MICU/SICU	5.8	K/uL	3.63	m/uL	NULL	NULL	NULL	NULL	260	K/uL	9.1	g/dL	20.2	%	29.2	%	NULL	NULL	NULL	NULL	NULL	NULL	129	mEq/L	9.5	mEq/L	8.3	mg/dL	92	mEq/L	145	mg/dL	NULL	NULL	20	mEq/L	7.44	units	46	mm Hg
13413160	64	M	BLACK/AFRICAN AMERICAN	136	NULL	Medicare	English	SINGLE	SICU	10	K/uL	4.39	m/uL	6.74	K/uL	2.14	K/uL	183	K/uL	11.6	g/dL	15.3	%	36	%	3.4	g/dL	NULL	NULL	NULL	NULL	149.67	mEq/L	4.73	mEq/L	8.8	mg/dL	109.67	mEq/L	84	mg/dL	5.6	%	16.67	mEq/L	7.38	units	45	mm Hg
13416526	84	M	WHITE	49.45	160	Medicare	English	MARRIED	MICU/SICU	76.35	K/uL	3.82	m/uL	31.28	K/uL	43.01	K/uL	323.5	K/uL	8.95	g/dL	18.15	%	30.35	%	NULL	NULL	NULL	NULL	NULL	NULL	151	mEq/L	3.8	mEq/L	8.45	mg/dL	111	mEq/L	95.5	mg/dL	NULL	NULL	10.5	mEq/L	7.41	units	49.33	mm Hg
13417577	87	F	WHITE	58	NULL	Medicare	English	DIVORCED	MICU/SICU	15.9	K/uL	3.64	m/uL	13.02	K/uL	1.33	K/uL	189	K/uL	10.35	g/dL	14.6	%	32.4	%	NULL	NULL	NULL	NULL	NULL	NULL	135	mEq/L	3.6	mEq/L	8.2	mg/dL	103	mEq/L	119	mg/dL	NULL	NULL	13	mEq/L	NULL	NULL	NULL	NULL
13419673	66	F	WHITE	47.5	160	Medicare	English	WIDOWED	SICU	26.81	K/uL	2.57	m/uL	12.93	K/uL	3.79	K/uL	230.5	K/uL	7.91	g/dL	16.03	%	24.61	%	1.9	g/dL	NULL	NULL	NULL	NULL	141.75	mEq/L	5.61	mEq/L	8	mg/dL	109.25	mEq/L	144.75	mg/dL	NULL	NULL	14.38	mEq/L	7.19	units	47.1	mm Hg
13420708	72	M	WHITE	70	NULL	Medicare	English	SINGLE	TSICU	26	K/uL	4.97	m/uL	NULL	NULL	NULL	NULL	446	K/uL	10.5	g/dL	20.55	%	35.2	%	2.4	g/dL	NULL	NULL	NULL	NULL	131.67	mEq/L	3.97	mEq/L	8.3	mg/dL	97.67	mEq/L	101.33	mg/dL	NULL	NULL	10.33	mEq/L	7.38	units	40	mm Hg
13425635	83	M	WHITE	65.15	170	Medicare	English	DIVORCED	CVICU	8.1	K/uL	2.49	m/uL	6.95	K/uL	1.13	K/uL	203	K/uL	7.83	g/dL	12.33	%	24.38	%	NULL	NULL	NULL	NULL	NULL	NULL	140.67	mEq/L	4.33	mEq/L	8.73	mg/dL	107.67	mEq/L	103	mg/dL	NULL	NULL	14.33	mEq/L	7.45	units	36	mm Hg
13445123	64	F	WHITE	52	NULL	Medicare	English	MARRIED	Neuro Intermediate	13.8	K/uL	2.99	m/uL	NULL	NULL	NULL	NULL	263	K/uL	9.8	g/dL	13.6	%	30.1	%	NULL	NULL	NULL	NULL	NULL	NULL	139	mEq/L	3.9	mEq/L	8	mg/dL	102	mEq/L	139	mg/dL	NULL	NULL	14	mEq/L	NULL	NULL	NULL	NULL
13446842	75	M	WHITE	61.4	NULL	Medicare	English	MARRIED	SICU	10.9	K/uL	2.85	m/uL	NULL	NULL	NULL	NULL	261	K/uL	8.9	g/dL	15	%	29.7	%	NULL	NULL	NULL	NULL	NULL	NULL	135	mEq/L	4.85	mEq/L	7.8	mg/dL	101	mEq/L	802.5	mg/dL	NULL	NULL	10.5	mEq/L	7.42	units	38	mm Hg
13446881	67	M	WHITE	78.9333	191	Medicare	English	NULL	MICU	14.43	K/uL	3.78	m/uL	14.11	K/uL	0.44	K/uL	203.67	K/uL	12.17	g/dL	13.5	%	34.47	%	2.67	g/dL	NULL	NULL	NULL	NULL	116.5	mEq/L	4.48	mEq/L	7.05	mg/dL	84	mEq/L	182.5	mg/dL	5.6	%	14.75	mEq/L	7.25	units	47.89	mm Hg
13448249	71	M	WHITE	68	NULL	Medicare	English	MARRIED	TSICU	10.05	K/uL	4.88	m/uL	NULL	NULL	NULL	NULL	210	K/uL	14.85	g/dL	13.8	%	44.55	%	NULL	NULL	NULL	NULL	NULL	NULL	143	mEq/L	3.95	mEq/L	8.35	mg/dL	105.5	mEq/L	105.5	mg/dL	NULL	NULL	13	mEq/L	7.41	units	43.5	mm Hg
13454746	62	F	WHITE	58.1	160	NULL	English	SINGLE	MICU/SICU	0.1	K/uL	4.02	m/uL	NULL	K/uL	NULL	K/uL	78	K/uL	11.5	g/dL	15.2	%	35.5	%	2.6	g/dL	NULL	NULL	NULL	NULL	132	mEq/L	4.2	mEq/L	6.8	mg/dL	103	mEq/L	144	mg/dL	NULL	NULL	12	mEq/L	NULL	NULL	NULL	NULL
13457864	58	F	UNKNOWN	93.55	170	Medicaid	English	DIVORCED	CVICU	29.93	K/uL	3.92	m/uL	23.93	K/uL	3.85	K/uL	127.67	K/uL	8.03	g/dL	19.17	%	25.8	%	3.6	g/dL	NULL	NULL	NULL	NULL	137.5	mEq/L	4.1	mEq/L	8.8	mg/dL	105	mEq/L	123	mg/dL	NULL	NULL	13	mEq/L	7.39	units	43.92	mm Hg
13461444	77	F	WHITE	61.55	157	Medicare	English	MARRIED	CCU	10.35	K/uL	4.21	m/uL	NULL	NULL	NULL	NULL	197.5	K/uL	12.75	g/dL	14.35	%	40.45	%	4	g/dL	NULL	NULL	NULL	NULL	137	mEq/L	4.5	mEq/L	8.8	mg/dL	101.5	mEq/L	119.5	mg/dL	NULL	NULL	14	mEq/L	7.25	units	50	mm Hg
13462065	67	M	WHITE	48.8	160	Medicare	English	DIVORCED	MICU	19.35	K/uL	2.76	m/uL	18.57	K/uL	0.42	K/uL	264.5	K/uL	8.75	g/dL	13.45	%	27.15	%	2.8	g/dL	NULL	NULL	NULL	NULL	136.33	mEq/L	3.07	mEq/L	7.6	mg/dL	103.67	mEq/L	120.33	mg/dL	NULL	NULL	19.33	mEq/L	7.31	units	34.67	mm Hg
13467793	87	M	BLACK/AFRICAN AMERICAN	80	180	Medicare	English	MARRIED	CCU	15.63	K/uL	3.36	m/uL	NULL	NULL	NULL	NULL	142.33	K/uL	10.33	g/dL	14.93	%	32	%	3.2	g/dL	NULL	NULL	NULL	NULL	127.67	mEq/L	6.45	mEq/L	9.43	mg/dL	90.67	mEq/L	73	mg/dL	NULL	NULL	24.67	mEq/L	7.36	units	34.2	mm Hg
13470722	69	F	WHITE	90.7	NULL	Medicare	English	SINGLE	Neuro Intermediate	13.75	K/uL	4.12	m/uL	NULL	NULL	NULL	NULL	208	K/uL	14.1	g/dL	13.2	%	41.95	%	NULL	NULL	NULL	NULL	NULL	NULL	142.5	mEq/L	4.55	mEq/L	9	mg/dL	104.5	mEq/L	131	mg/dL	NULL	NULL	14	mEq/L	NULL	NULL	NULL	NULL
13483568	70	M	WHITE	89.9	178	Medicare	English	MARRIED	CVICU	19.63	K/uL	3.09	m/uL	16.22	K/uL	3.58	K/uL	152.67	K/uL	9.53	g/dL	15.93	%	27.9	%	NULL	NULL	NULL	NULL	NULL	NULL	135	mEq/L	4.3	mEq/L	8	mg/dL	110	mEq/L	NULL	NULL	NULL	NULL	6.5	mEq/L	7.29	units	42.88	mm Hg
13484392	76	M	BLACK/AFRICAN AMERICAN	50	170	Medicare	English	NULL	MICU	14.9	K/uL	2.97	m/uL	12.61	K/uL	0.93	K/uL	238	K/uL	9.1	g/dL	13.8	%	30.07	%	3.25	g/dL	NULL	NULL	NULL	NULL	143	mEq/L	4.9	mEq/L	8.9	mg/dL	99.25	mEq/L	122.75	mg/dL	NULL	NULL	9.5	mEq/L	7.38	units	64.57	mm Hg
13494609	68	M	WHITE	60.7	173	Medicaid	English	MARRIED	MICU/SICU	NULL	NULL	NULL	NULL	NULL	NULL	NULL	NULL	NULL	NULL	NULL	NULL	NULL	NULL	NULL	NULL	NULL	NULL	NULL	NULL	NULL	NULL	NULL	NULL	NULL	NULL	NULL	NULL	NULL	NULL	NULL	NULL	NULL	NULL	NULL	NULL	NULL	NULL	NULL	NULL
13496595	87	M	WHITE - EASTERN EUROPEAN	68.6	NULL	Private	English	MARRIED	MICU/SICU	11.6	K/uL	2.73	m/uL	NULL	NULL	NULL	NULL	163	K/uL	9.07	g/dL	17.77	%	27.93	%	1.8	g/dL	NULL	NULL	NULL	NULL	138.5	mEq/L	3.75	mEq/L	7.45	mg/dL	109	mEq/L	90	mg/dL	NULL	NULL	12.25	mEq/L	7.33	units	34	mm Hg
13504095	67	F	WHITE	78.4	NULL	Medicare	English	SINGLE	MICU/SICU	19.8	K/uL	3.4	m/uL	NULL	NULL	NULL	NULL	246	K/uL	9.4	g/dL	16.3	%	30.4	%	NULL	NULL	NULL	NULL	NULL	NULL	140	mEq/L	4.4	mEq/L	7	mg/dL	98	mEq/L	171	mg/dL	NULL	NULL	14	mEq/L	7.36	units	51.67	mm Hg
13506015	77	M	WHITE	98.7	188	Medicare	English	SINGLE	MICU/SICU	10.73	K/uL	3.88	m/uL	11.99	K/uL	0.28	K/uL	204	K/uL	12.7	g/dL	18.07	%	40.6	%	2.4	g/dL	NULL	NULL	NULL	NULL	136	mEq/L	3.53	mEq/L	7.63	mg/dL	105.67	mEq/L	117.33	mg/dL	NULL	NULL	11.67	mEq/L	7.04	units	76.25	mm Hg
13511021	75	F	UNKNOWN	52.7	165	Medicare	English	MARRIED	MICU/SICU	27.35	K/uL	2.99	m/uL	NULL	NULL	NULL	NULL	391	K/uL	9.05	g/dL	16.8	%	30.1	%	NULL	NULL	NULL	NULL	NULL	NULL	140.5	mEq/L	4.95	mEq/L	8.7	mg/dL	104	mEq/L	151	mg/dL	NULL	NULL	13	mEq/L	7.26	units	58	mm Hg
13515219	74	M	UNKNOWN	93.25	178	Medicare	English	NULL	SICU	18.1	K/uL	4.3	m/uL	NULL	NULL	NULL	NULL	276	K/uL	12.9	g/dL	15.4	%	39.4	%	NULL	NULL	NULL	NULL	NULL	NULL	138	mEq/L	5	mEq/L	8.3	mg/dL	104	mEq/L	160	mg/dL	NULL	NULL	17	mEq/L	7.3	units	50.5	mm Hg
13517478	87	F	WHITE	62.6	150	Medicare	English	SINGLE	MICU/SICU	23.2	K/uL	4.81	m/uL	21.81	K/uL	0	K/uL	399	K/uL	13.4	g/dL	13.8	%	42	%	NULL	NULL	NULL	NULL	NULL	NULL	127	mEq/L	4.1	mEq/L	10.4	mg/dL	85	mEq/L	128	mg/dL	NULL	NULL	19	mEq/L	7.4	units	62	mm Hg
13523637	73	M	WHITE	90	173	Private	English	MARRIED	MICU/SICU	12.53	K/uL	2.09	m/uL	8.79	K/uL	0.91	K/uL	80	K/uL	6.43	g/dL	16.9	%	20.87	%	2.85	g/dL	NULL	NULL	NULL	NULL	139.75	mEq/L	5.15	mEq/L	7.1	mg/dL	104.75	mEq/L	115.5	mg/dL	NULL	NULL	15.75	mEq/L	7.23	units	50.86	mm Hg
13524757	80	F	WHITE	79.5	NULL	Medicare	English	NULL	SICU	6.3	K/uL	4.03	m/uL	NULL	NULL	NULL	NULL	237	K/uL	12.5	g/dL	13.6	%	39.4	%	NULL	NULL	NULL	NULL	NULL	NULL	144	mEq/L	3.7	mEq/L	9.2	mg/dL	109	mEq/L	92	mg/dL	6.2	%	9	mEq/L	NULL	NULL	NULL	NULL
13528463	79	M	UNKNOWN	66.4	180	Medicare	English	MARRIED	MICU	25.5	K/uL	2.97	m/uL	NULL	NULL	NULL	NULL	133	K/uL	9.2	g/dL	17.9	%	30.5	%	NULL	NULL	NULL	NULL	NULL	NULL	141	mEq/L	4.75	mEq/L	7.5	mg/dL	106	mEq/L	183	mg/dL	NULL	NULL	17	mEq/L	7.34	units	38	mm Hg
13537559	52	M	UNKNOWN	109	178	Medicaid	English	NULL	MICU	8.85	K/uL	2.21	m/uL	6.43	K/uL	0.98	K/uL	166.25	K/uL	8.33	g/dL	25.28	%	23.18	%	NULL	NULL	NULL	NULL	NULL	NULL	134.33	mEq/L	3.63	mEq/L	8.13	mg/dL	90.67	mEq/L	123	mg/dL	NULL	NULL	21.67	mEq/L	7.4	units	45	mm Hg
13539642	51	M	BLACK/AFRICAN AMERICAN	67.4	NULL	Private	English	MARRIED	MICU	4.93	K/uL	3.99	m/uL	NULL	NULL	NULL	NULL	141.75	K/uL	12.6	g/dL	13.33	%	37.98	%	3.85	g/dL	NULL	NULL	NULL	NULL	138.8	mEq/L	3.9	mEq/L	9.42	mg/dL	101.2	mEq/L	98.4	mg/dL	NULL	NULL	12.8	mEq/L	7.45	units	35	mm Hg
13540953	75	F	WHITE	47	NULL	Medicare	English	DIVORCED	Neuro SICU	18.83	K/uL	3.79	m/uL	NULL	NULL	NULL	NULL	469.67	K/uL	9.47	g/dL	17.17	%	29.37	%	NULL	NULL	NULL	NULL	NULL	NULL	142.67	mEq/L	4.07	mEq/L	8.27	mg/dL	112.67	mEq/L	136.67	mg/dL	NULL	NULL	11	mEq/L	7.25	units	46.5	mm Hg
13541559	55	F	UNKNOWN	43.8	157	Medicaid	English	SINGLE	MICU	9.33	K/uL	4.31	m/uL	NULL	NULL	NULL	NULL	148.33	K/uL	13	g/dL	12.87	%	39.77	%	NULL	NULL	NULL	NULL	NULL	NULL	138.4	mEq/L	3.98	mEq/L	10.88	mg/dL	104.6	mEq/L	107.8	mg/dL	NULL	NULL	16	mEq/L	7.32	units	39.67	mm Hg
13549057	83	M	WHITE	132.1	183	Medicare	English	MARRIED	MICU/SICU	23.5	K/uL	4.37	m/uL	NULL	NULL	NULL	NULL	242	K/uL	12.4	g/dL	16.1	%	38.6	%	NULL	NULL	NULL	NULL	NULL	NULL	136	mEq/L	4.3	mEq/L	8.1	mg/dL	107	mEq/L	164	mg/dL	NULL	NULL	12	mEq/L	NULL	NULL	NULL	NULL
13551906	73	M	WHITE	90	NULL	Medicaid	English	WIDOWED	MICU	6.8	K/uL	2.92	m/uL	NULL	NULL	NULL	NULL	162.5	K/uL	9.1	g/dL	15.25	%	29.1	%	NULL	NULL	NULL	NULL	NULL	NULL	138.67	mEq/L	5.78	mEq/L	9.3	mg/dL	103.33	mEq/L	99.33	mg/dL	NULL	NULL	10.33	mEq/L	7.32	units	48	mm Hg
13552577	87	F	BLACK/AFRICAN AMERICAN	70.9	NULL	Medicare	English	DIVORCED	MICU	17.57	K/uL	3.16	m/uL	NULL	NULL	NULL	NULL	212.33	K/uL	8.43	g/dL	16.9	%	29.33	%	NULL	NULL	NULL	NULL	NULL	NULL	142.5	mEq/L	4.4	mEq/L	8.5	mg/dL	108.5	mEq/L	126	mg/dL	NULL	NULL	13.5	mEq/L	NULL	NULL	NULL	NULL
13560802	70	M	WHITE - OTHER EUROPEAN	134.1	183	Medicare	English	MARRIED	CVICU	18.8	K/uL	4.15	m/uL	10.94	K/uL	2.63	K/uL	117.33	K/uL	12.3	g/dL	13.43	%	39.03	%	NULL	NULL	NULL	NULL	NULL	NULL	138.33	mEq/L	4.67	mEq/L	NULL	NULL	105.33	mEq/L	125	mg/dL	NULL	NULL	11.5	mEq/L	7.34	units	47.13	mm Hg
13560848	80	M	WHITE	63.7	NULL	Medicare	English	SINGLE	SICU	9.8	K/uL	4.01	m/uL	NULL	NULL	NULL	NULL	138.5	K/uL	12.3	g/dL	14.2	%	38.45	%	NULL	NULL	NULL	NULL	NULL	NULL	139.5	mEq/L	3.75	mEq/L	8.8	mg/dL	101.5	mEq/L	78.5	mg/dL	NULL	NULL	13.5	mEq/L	7.3	units	NULL	NULL
13561482	62	M	UNKNOWN	120.1	183	Private	English	NULL	MICU	17.5	K/uL	4	m/uL	NULL	NULL	NULL	NULL	270	K/uL	12.3	g/dL	12.9	%	33.7	%	3.4	g/dL	NULL	NULL	NULL	NULL	112	mEq/L	3.9	mEq/L	7.85	mg/dL	75.5	mEq/L	132	mg/dL	NULL	NULL	11.5	mEq/L	7.33	units	51.5	mm Hg
13568606	71	M	WHITE	96.9	183	Medicare	English	SINGLE	MICU/SICU	2.05	K/uL	2.63	m/uL	1.72	K/uL	0.22	K/uL	65.5	K/uL	8.7	g/dL	16.05	%	25.6	%	NULL	NULL	NULL	NULL	NULL	NULL	134	mEq/L	3.4	mEq/L	8	mg/dL	94	mEq/L	109	mg/dL	NULL	NULL	14	mEq/L	7.5	units	38	mm Hg
13569368	78	F	WHITE	99	152	Medicare	English	WIDOWED	MICU/SICU	8.1	K/uL	5.5	m/uL	NULL	NULL	NULL	NULL	234	K/uL	13.1	g/dL	16.2	%	43.9	%	NULL	NULL	NULL	NULL	NULL	NULL	140	mEq/L	4.6	mEq/L	8.8	mg/dL	91.5	mEq/L	136	mg/dL	NULL	NULL	14.5	mEq/L	NULL	NULL	NULL	NULL
13571952	75	M	WHITE	104.133	165	Medicare	English	MARRIED	TSICU	19.57	K/uL	3.68	m/uL	NULL	NULL	NULL	NULL	198.67	K/uL	11.87	g/dL	13.7	%	37.1	%	NULL	NULL	NULL	NULL	NULL	NULL	139	mEq/L	3.67	mEq/L	8.13	mg/dL	103.33	mEq/L	132.33	mg/dL	NULL	NULL	15.33	mEq/L	7.33	units	47	mm Hg
13575761	58	M	WHITE	96.6	NULL	Medicaid	English	DIVORCED	SICU	16	K/uL	3.92	m/uL	NULL	NULL	NULL	NULL	251	K/uL	11.3	g/dL	12.9	%	36.2	%	NULL	NULL	NULL	NULL	NULL	NULL	135.5	mEq/L	5.15	mEq/L	8.7	mg/dL	100	mEq/L	134.5	mg/dL	NULL	NULL	14.5	mEq/L	7.32	units	NULL	NULL
13586954	88	F	WHITE - RUSSIAN	88	NULL	Medicare	Russian	DIVORCED	MICU	14.1	K/uL	4.03	m/uL	12.1	K/uL	1.03	K/uL	306	K/uL	10.9	g/dL	16.1	%	35.6	%	NULL	NULL	NULL	NULL	NULL	NULL	139	mEq/L	4.3	mEq/L	10.25	mg/dL	96.5	mEq/L	115.5	mg/dL	NULL	NULL	15.5	mEq/L	7.43	units	53	mm Hg
13587877	79	M	WHITE	90.2333	173	Medicare	English	SINGLE	MICU/SICU	5.5	K/uL	3.03	m/uL	3.46	K/uL	1.32	K/uL	99	K/uL	9.25	g/dL	15.25	%	29.15	%	2.85	g/dL	NULL	NULL	NULL	NULL	141.5	mEq/L	4	mEq/L	7.8	mg/dL	104.5	mEq/L	89	mg/dL	NULL	NULL	17.5	mEq/L	7.38	units	48	mm Hg
13588162	65	F	WHITE	84.9	170	Medicaid	English	SINGLE	Neuro Intermediate	4.7	K/uL	3.85	m/uL	NULL	NULL	NULL	NULL	196	K/uL	12.1	g/dL	16.7	%	35.3	%	NULL	NULL	NULL	NULL	NULL	NULL	143	mEq/L	4	mEq/L	9.6	mg/dL	107	mEq/L	158	mg/dL	NULL	NULL	14	mEq/L	NULL	NULL	NULL	NULL
13588863	73	F	WHITE	54.5	NULL	Medicare	English	WIDOWED	MICU/SICU	4.5	K/uL	4.39	m/uL	NULL	NULL	NULL	NULL	276	K/uL	13.4	g/dL	12.2	%	41.8	%	NULL	NULL	NULL	NULL	NULL	NULL	137	mEq/L	5.6	mEq/L	8.4	mg/dL	97	mEq/L	121	mg/dL	NULL	NULL	9	mEq/L	NULL	NULL	NULL	NULL
13591121	81	F	BLACK/AFRICAN AMERICAN	51.4	NULL	Medicare	English	WIDOWED	SICU	5	K/uL	2.57	m/uL	2.64	K/uL	0.77	K/uL	305	K/uL	6.55	g/dL	17	%	23.4	%	NULL	NULL	NULL	NULL	NULL	NULL	140	mEq/L	4.6	mEq/L	8.5	mg/dL	96	mEq/L	164	mg/dL	NULL	NULL	9	mEq/L	7.34	units	70.67	mm Hg
13594409	70	F	WHITE	96.1	NULL	Medicare	English	WIDOWED	MICU/SICU	16.5	K/uL	2.23	m/uL	14	K/uL	0.96	K/uL	177	K/uL	7.5	g/dL	17.6	%	23.3	%	NULL	NULL	NULL	NULL	NULL	NULL	137	mEq/L	3.9	mEq/L	7.6	mg/dL	103	mEq/L	96	mg/dL	NULL	NULL	16	mEq/L	7.37	units	NULL	NULL
13595620	87	F	BLACK/AFRICAN AMERICAN	70	160	Medicare	English	WIDOWED	CCU	8.4	K/uL	3.04	m/uL	NULL	NULL	NULL	NULL	177	K/uL	9.1	g/dL	14.5	%	31	%	NULL	NULL	NULL	NULL	NULL	NULL	145	mEq/L	3.53	mEq/L	9.33	mg/dL	102.67	mEq/L	92.33	mg/dL	NULL	NULL	13.67	mEq/L	7.36	units	61.5	mm Hg
13598679	65	F	WHITE	48.6	150	Medicare	English	MARRIED	CCU	4.63	K/uL	2.55	m/uL	NULL	NULL	NULL	NULL	396.33	K/uL	7.1	g/dL	14.27	%	23	%	2.25	g/dL	NULL	NULL	NULL	NULL	133.33	mEq/L	4.27	mEq/L	8.73	mg/dL	97.33	mEq/L	133.67	mg/dL	NULL	NULL	19.67	mEq/L	7.18	units	58.33	mm Hg
13600729	82	M	WHITE	113.95	NULL	Medicare	English	MARRIED	CVICU	42	K/uL	2.77	m/uL	38.04	K/uL	0.79	K/uL	333	K/uL	8.2	g/dL	14.7	%	25.9	%	2.6	g/dL	NULL	NULL	NULL	NULL	140	mEq/L	4.05	mEq/L	8.85	mg/dL	98	mEq/L	173.5	mg/dL	NULL	NULL	12.5	mEq/L	7.34	units	59	mm Hg
13605705	60	M	PORTUGUESE	65.9	NULL	Medicare	English	SINGLE	MICU	6.75	K/uL	2.48	m/uL	NULL	NULL	NULL	NULL	83.5	K/uL	8.08	g/dL	12.7	%	23.43	%	2.4	g/dL	NULL	NULL	NULL	NULL	128.5	mEq/L	3.55	mEq/L	6.95	mg/dL	95	mEq/L	219.5	mg/dL	NULL	NULL	7	mEq/L	NULL	NULL	NULL	NULL
13609416	81	M	BLACK/AFRICAN AMERICAN	74.5	NULL	Medicaid	English	DIVORCED	MICU/SICU	4.2	K/uL	3.59	m/uL	3.12	K/uL	0.61	K/uL	203	K/uL	8.85	g/dL	20.05	%	30.8	%	NULL	NULL	NULL	NULL	NULL	NULL	148	mEq/L	4.7	mEq/L	7.5	mg/dL	112.67	mEq/L	100.33	mg/dL	NULL	NULL	8	mEq/L	7.22	units	79.3	mm Hg
13610988	94	F	WHITE	57	NULL	Medicare	English	WIDOWED	MICU/SICU	15.7	K/uL	3.37	m/uL	NULL	NULL	NULL	NULL	331	K/uL	9.2	g/dL	17.2	%	30	%	NULL	NULL	NULL	NULL	NULL	NULL	146	mEq/L	4.45	mEq/L	8.85	mg/dL	112	mEq/L	130.5	mg/dL	NULL	NULL	11.5	mEq/L	7.34	units	44	mm Hg
13611316	87	F	WHITE	59	NULL	Medicare	English	SINGLE	SICU	6.1	K/uL	4.29	m/uL	NULL	NULL	NULL	NULL	126	K/uL	13.5	g/dL	14.2	%	40.9	%	NULL	NULL	NULL	NULL	NULL	NULL	140	mEq/L	4.5	mEq/L	8.6	mg/dL	108	mEq/L	99	mg/dL	NULL	NULL	16	mEq/L	NULL	NULL	NULL	NULL
13619821	62	M	WHITE	83.4	NULL	Private	English	SINGLE	MICU	14.7	K/uL	2.28	m/uL	NULL	NULL	NULL	NULL	209.88	K/uL	6.73	g/dL	14.74	%	21.06	%	1.7	g/dL	NULL	NULL	NULL	NULL	137.75	mEq/L	4.98	mEq/L	7.5	mg/dL	106.75	mEq/L	117.75	mg/dL	NULL	NULL	11.25	mEq/L	7.36	units	38.17	mm Hg
13625240	72	F	WHITE	61.3	NULL	Private	English	MARRIED	Neuro Intermediate	9.5	K/uL	3.88	m/uL	NULL	NULL	NULL	NULL	231	K/uL	12.6	g/dL	13.35	%	37.9	%	NULL	NULL	NULL	NULL	NULL	NULL	138.5	mEq/L	3.85	mEq/L	8.3	mg/dL	103.5	mEq/L	110.5	mg/dL	NULL	NULL	15.5	mEq/L	NULL	NULL	NULL	NULL
13628520	62	M	WHITE	61.5	175	Private	English	MARRIED	TSICU	10.4	K/uL	2.65	m/uL	8.05	K/uL	0.63	K/uL	132.33	K/uL	8.33	g/dL	14.2	%	24.18	%	NULL	NULL	NULL	NULL	NULL	NULL	133	mEq/L	4.2	mEq/L	7.75	mg/dL	97.5	mEq/L	160.5	mg/dL	NULL	NULL	15	mEq/L	7.29	units	42	mm Hg
13632970	74	M	UNKNOWN	98.8	168	Medicare	English	MARRIED	CVICU	21.7	K/uL	3.36	m/uL	21.19	K/uL	1.9	K/uL	182.25	K/uL	9.4	g/dL	14.6	%	28.27	%	NULL	NULL	NULL	NULL	NULL	NULL	143	mEq/L	4.15	mEq/L	8	mg/dL	115	mEq/L	122.5	mg/dL	5.9	%	11	mEq/L	7.27	units	41.75	mm Hg
13645739	76	M	UNABLE TO OBTAIN	68	NULL	Medicare	English	NULL	SICU	14.4	K/uL	3.88	m/uL	NULL	NULL	NULL	NULL	144.5	K/uL	11.75	g/dL	16.05	%	34.5	%	NULL	NULL	NULL	NULL	NULL	NULL	135	mEq/L	4.8	mEq/L	8.1	mg/dL	103	mEq/L	160.5	mg/dL	NULL	NULL	12	mEq/L	7.32	units	43	mm Hg
13647219	69	M	WHITE	82.7	178	Medicare	English	MARRIED	CVICU	7.7	K/uL	3.12	m/uL	NULL	NULL	NULL	NULL	135	K/uL	9	g/dL	13.8	%	29.4	%	NULL	NULL	NULL	NULL	NULL	NULL	142	mEq/L	4.2	mEq/L	7.9	mg/dL	106	mEq/L	109	mg/dL	NULL	NULL	10	mEq/L	NULL	NULL	NULL	NULL
13648140	86	M	WHITE - OTHER EUROPEAN	74	170	Medicare	English	WIDOWED	TSICU	18.7	K/uL	3.83	m/uL	NULL	NULL	NULL	NULL	343.5	K/uL	10.5	g/dL	16.95	%	33.55	%	NULL	NULL	NULL	NULL	NULL	NULL	134	mEq/L	9.95	mEq/L	8.65	mg/dL	100.5	mEq/L	124.5	mg/dL	NULL	NULL	11.5	mEq/L	7.37	units	39	mm Hg
13651171	60	F	WHITE	75	NULL	Medicaid	English	SINGLE	Neuro Intermediate	11.2	K/uL	3.23	m/uL	NULL	NULL	NULL	NULL	208	K/uL	9.47	g/dL	13.7	%	29.33	%	NULL	NULL	NULL	NULL	NULL	NULL	144	mEq/L	2.9	mEq/L	7.8	mg/dL	107.5	mEq/L	114	mg/dL	NULL	NULL	10	mEq/L	NULL	NULL	NULL	NULL
13651453	75	F	WHITE	74.6	NULL	Medicare	English	MARRIED	MICU/SICU	10.86	K/uL	2.96	m/uL	NULL	NULL	NULL	NULL	193	K/uL	9.12	g/dL	15.56	%	27.45	%	2	g/dL	NULL	NULL	NULL	NULL	139.5	mEq/L	3.6	mEq/L	6.8	mg/dL	108	mEq/L	93.5	mg/dL	NULL	NULL	11	mEq/L	7.47	units	36	mm Hg
13655271	58	M	UNKNOWN	90	NULL	Private	English	NULL	MICU	19.38	K/uL	4.01	m/uL	NULL	NULL	NULL	NULL	428	K/uL	11.12	g/dL	14.62	%	35.82	%	NULL	NULL	NULL	NULL	NULL	NULL	139	mEq/L	4.8	mEq/L	7.6	mg/dL	105	mEq/L	134	mg/dL	NULL	NULL	11	mEq/L	7.37	units	NULL	NULL
13658570	70	F	WHITE	82.75	NULL	Medicare	English	MARRIED	CCU	14.03	K/uL	3.6	m/uL	13.93	K/uL	1.89	K/uL	209	K/uL	10.9	g/dL	13.47	%	33.27	%	NULL	NULL	NULL	NULL	NULL	NULL	139.67	mEq/L	3.63	mEq/L	8.9	mg/dL	102	mEq/L	110	mg/dL	NULL	NULL	13.5	mEq/L	7.38	units	48	mm Hg
13659641	57	F	WHITE	150	160	Private	English	MARRIED	MICU	14.3	K/uL	4.12	m/uL	NULL	NULL	NULL	NULL	289	K/uL	9.6	g/dL	22.8	%	33	%	2.9	g/dL	NULL	NULL	NULL	NULL	137	mEq/L	3.8	mEq/L	8.8	mg/dL	98	mEq/L	142	mg/dL	4.8	%	10	mEq/L	7.36	units	53.5	mm Hg
13662941	74	M	WHITE	97.2	175	Medicare	English	MARRIED	MICU/SICU	10.7	K/uL	3.63	m/uL	9.95	K/uL	0.55	K/uL	210	K/uL	10.1	g/dL	16.65	%	32.2	%	2.9	g/dL	NULL	NULL	NULL	NULL	136.5	mEq/L	4	mEq/L	7.85	mg/dL	102.5	mEq/L	152.5	mg/dL	NULL	NULL	11.5	mEq/L	7.36	units	43.33	mm Hg
13666616	68	F	WHITE	57	NULL	Medicare	English	MARRIED	SICU	5.35	K/uL	3.32	m/uL	NULL	NULL	NULL	NULL	229.5	K/uL	12.1	g/dL	13.1	%	36	%	NULL	NULL	NULL	NULL	NULL	NULL	136.5	mEq/L	3.45	mEq/L	9.15	mg/dL	99.5	mEq/L	90	mg/dL	NULL	NULL	17	mEq/L	NULL	NULL	NULL	NULL
13668411	79	F	UNABLE TO OBTAIN	54.4667	155	Medicare	English	SINGLE	MICU/SICU	16.05	K/uL	3.65	m/uL	NULL	NULL	NULL	NULL	382.5	K/uL	11	g/dL	11.8	%	34.4	%	3.5	g/dL	2.95	g/dL	6.45	g/dL	132.5	mEq/L	4.05	mEq/L	9.1	mg/dL	98	mEq/L	180.5	mg/dL	NULL	NULL	11	mEq/L	7.35	units	47	mm Hg
13677688	63	M	WHITE	84.1	NULL	Private	English	MARRIED	MICU/SICU	14	K/uL	3.31	m/uL	11.66	K/uL	0.62	K/uL	431.5	K/uL	9.45	g/dL	19.25	%	30.65	%	3.6	g/dL	NULL	NULL	NULL	NULL	135	mEq/L	3.95	mEq/L	8.95	mg/dL	95	mEq/L	96.5	mg/dL	NULL	NULL	15	mEq/L	NULL	NULL	NULL	NULL
13679248	71	F	WHITE	50	NULL	Medicare	English	SINGLE	Neuro Intermediate	8	K/uL	3.23	m/uL	NULL	NULL	NULL	NULL	288	K/uL	8.4	g/dL	15	%	27	%	NULL	NULL	NULL	NULL	NULL	NULL	140	mEq/L	4.3	mEq/L	9.6	mg/dL	109	mEq/L	147	mg/dL	NULL	NULL	13	mEq/L	NULL	NULL	NULL	NULL
13681438	64	F	UNKNOWN	62.2	168	Medicaid	English	NULL	MICU	5.83	K/uL	3.03	m/uL	6.04	K/uL	0.71	K/uL	95.33	K/uL	9.7	g/dL	13.57	%	29.17	%	3.6	g/dL	NULL	NULL	NULL	NULL	135.33	mEq/L	3.57	mEq/L	9.33	mg/dL	92	mEq/L	128	mg/dL	NULL	NULL	24	mEq/L	7.3	units	41	mm Hg
13681651	83	F	WHITE	52.7	152	Medicare	English	SINGLE	MICU	15.1	K/uL	3.57	m/uL	NULL	NULL	NULL	NULL	278	K/uL	10.63	g/dL	20.17	%	33.23	%	NULL	NULL	NULL	NULL	NULL	NULL	142.5	mEq/L	4.95	mEq/L	8.1	mg/dL	105.5	mEq/L	104	mg/dL	NULL	NULL	14.5	mEq/L	NULL	NULL	NULL	NULL
13681703	54	F	WHITE	51.1	157	Medicare	English	SINGLE	CCU	13.3	K/uL	3.56	m/uL	NULL	NULL	NULL	NULL	223	K/uL	12.3	g/dL	12.8	%	38.1	%	NULL	NULL	NULL	NULL	NULL	NULL	136	mEq/L	4.3	mEq/L	9.5	mg/dL	101	mEq/L	147	mg/dL	NULL	NULL	12	mEq/L	NULL	NULL	NULL	NULL
13692505	84	M	WHITE	115.5	185	Medicare	English	MARRIED	CCU	7.3	K/uL	4.24	m/uL	NULL	NULL	NULL	NULL	155	K/uL	12.2	g/dL	15.4	%	36.8	%	3.7	g/dL	NULL	NULL	NULL	NULL	142.5	mEq/L	3.55	mEq/L	8.75	mg/dL	107	mEq/L	177	mg/dL	NULL	NULL	11	mEq/L	NULL	NULL	NULL	NULL
13693746	89	M	WHITE	92.1	NULL	Medicare	English	MARRIED	MICU	12.4	K/uL	3.55	m/uL	NULL	NULL	NULL	NULL	90.5	K/uL	11.25	g/dL	15.35	%	33.6	%	3.3	g/dL	NULL	NULL	NULL	NULL	137	mEq/L	4.5	mEq/L	7.9	mg/dL	106	mEq/L	117	mg/dL	NULL	NULL	14	mEq/L	7.36	units	45	mm Hg
13696494	39	M	WHITE	137.4	173	Medicaid	Modern Greek (1453-)	MARRIED	MICU	17.9	K/uL	4.36	m/uL	18.53	K/uL	2.68	K/uL	254.75	K/uL	12.73	g/dL	13.25	%	41.45	%	3.45	g/dL	NULL	NULL	NULL	NULL	140.5	mEq/L	2.98	mEq/L	8.08	mg/dL	94	mEq/L	218.75	mg/dL	NULL	NULL	19.75	mEq/L	7.54	units	39	mm Hg
13714256	57	F	HISPANIC/LATINO - PUERTO RICAN	124.4	NULL	Medicaid	English	MARRIED	MICU	7.2	K/uL	4.44	m/uL	6.37	K/uL	0.54	K/uL	146	K/uL	13.2	g/dL	12.4	%	43.1	%	3.6	g/dL	NULL	NULL	NULL	NULL	135	mEq/L	5	mEq/L	10.3	mg/dL	103	mEq/L	143	mg/dL	NULL	NULL	7	mEq/L	7.29	units	64.25	mm Hg
13714286	55	M	BLACK/AFRICAN AMERICAN	66	193	Medicaid	English	DIVORCED	MICU	19.25	K/uL	2.56	m/uL	17.85	K/uL	0.6	K/uL	203	K/uL	7.65	g/dL	14.55	%	23.6	%	2.5	g/dL	NULL	NULL	NULL	NULL	132	mEq/L	5	mEq/L	8.67	mg/dL	97.67	mEq/L	124.33	mg/dL	NULL	NULL	17	mEq/L	7.38	units	32	mm Hg
13722528	88	M	WHITE	72.85	NULL	Medicare	English	SINGLE	TSICU	8.44	K/uL	3.05	m/uL	5.69	K/uL	1.96	K/uL	149.14	K/uL	8.9	g/dL	14.8	%	27.9	%	NULL	NULL	NULL	NULL	NULL	NULL	138.5	mEq/L	3.75	mEq/L	8.2	mg/dL	97	mEq/L	104	mg/dL	NULL	NULL	11.5	mEq/L	NULL	NULL	NULL	NULL
13738743	77	M	WHITE - OTHER EUROPEAN	70.75	163	Medicare	English	MARRIED	CVICU	11	K/uL	3.46	m/uL	7.74	K/uL	1.91	K/uL	111.67	K/uL	10.67	g/dL	14.6	%	34.7	%	NULL	NULL	NULL	NULL	NULL	NULL	141	mEq/L	4.53	mEq/L	8	mg/dL	107.5	mEq/L	114.5	mg/dL	NULL	NULL	10	mEq/L	7.38	units	43.14	mm Hg
13739664	79	F	WHITE	53.2	NULL	Medicare	English	SINGLE	MICU	10.1	K/uL	3.74	m/uL	NULL	NULL	NULL	NULL	220	K/uL	12.3	g/dL	13.1	%	38.1	%	3.5	g/dL	NULL	NULL	NULL	NULL	135.67	mEq/L	4.33	mEq/L	8.73	mg/dL	102.67	mEq/L	182	mg/dL	NULL	NULL	11.33	mEq/L	7.32	units	45.2	mm Hg
13743788	83	M	WHITE	124	168	Medicare	English	MARRIED	MICU	29.03	K/uL	3.32	m/uL	26.97	K/uL	0.95	K/uL	105	K/uL	9.28	g/dL	17.1	%	29.78	%	3	g/dL	NULL	NULL	NULL	NULL	137.5	mEq/L	4.45	mEq/L	7.85	mg/dL	108.25	mEq/L	133	mg/dL	NULL	NULL	16.25	mEq/L	7.3	units	35.38	mm Hg
13744495	82	F	WHITE	63.2	NULL	Medicare	English	WIDOWED	MICU	7.7	K/uL	2.49	m/uL	NULL	NULL	NULL	NULL	165.8	K/uL	7.6	g/dL	16.94	%	23.88	%	3.7	g/dL	NULL	NULL	NULL	NULL	143	mEq/L	4	mEq/L	8.95	mg/dL	105.5	mEq/L	95	mg/dL	NULL	NULL	18.5	mEq/L	NULL	NULL	NULL	NULL
13744924	76	M	WHITE	74.5	NULL	Medicaid	English	SINGLE	TSICU	7.2	K/uL	3.3	m/uL	NULL	NULL	NULL	NULL	306	K/uL	10.4	g/dL	14	%	34.2	%	NULL	NULL	NULL	NULL	NULL	NULL	144	mEq/L	5.85	mEq/L	9	mg/dL	100.5	mEq/L	96.5	mg/dL	NULL	NULL	14.5	mEq/L	7.23	units	76.33	mm Hg
13746897	59	M	OTHER	80.3316	183	Medicare	English	MARRIED	MICU/SICU	10.9	K/uL	3.77	m/uL	NULL	NULL	NULL	NULL	196.5	K/uL	10.5	g/dL	18.4	%	34.45	%	NULL	NULL	NULL	NULL	NULL	NULL	137.6	mEq/L	6	mEq/L	9.2	mg/dL	96.4	mEq/L	134.4	mg/dL	NULL	NULL	23.8	mEq/L	7.35	units	39.67	mm Hg
13748490	90	F	WHITE	73.6	NULL	Medicare	English	WIDOWED	Neuro Intermediate	14.95	K/uL	2.38	m/uL	13.35	K/uL	0.77	K/uL	190	K/uL	7.35	g/dL	15.25	%	25.2	%	NULL	NULL	NULL	NULL	NULL	NULL	142	mEq/L	3.8	mEq/L	8.55	mg/dL	100.5	mEq/L	68.5	mg/dL	4.9	%	24	mEq/L	NULL	NULL	NULL	NULL
13751425	69	M	WHITE	102	NULL	Medicare	English	MARRIED	Neuro Intermediate	18.1	K/uL	4.73	m/uL	NULL	NULL	NULL	NULL	206	K/uL	15.8	g/dL	12.6	%	46.4	%	NULL	NULL	NULL	NULL	NULL	NULL	NULL	NULL	NULL	NULL	NULL	NULL	NULL	NULL	NULL	NULL	NULL	NULL	NULL	NULL	NULL	NULL	NULL	NULL
13751884	92	F	WHITE	51.3	147	Medicare	English	WIDOWED	TSICU	6	K/uL	4.3	m/uL	NULL	NULL	NULL	NULL	132	K/uL	9.4	g/dL	16.4	%	32.1	%	NULL	NULL	NULL	NULL	NULL	NULL	139	mEq/L	4.2	mEq/L	9.2	mg/dL	104	mEq/L	97	mg/dL	NULL	NULL	15	mEq/L	NULL	NULL	NULL	NULL
13757309	92	M	UNKNOWN	62.9	NULL	Medicare	English	NULL	Neuro SICU	8.5	K/uL	3.65	m/uL	5.59	K/uL	0.74	K/uL	90.33	K/uL	11.17	g/dL	14.37	%	34.73	%	3.5	g/dL	NULL	NULL	NULL	NULL	139.33	mEq/L	4.33	mEq/L	7.9	mg/dL	108.33	mEq/L	100.33	mg/dL	5.8	%	16	mEq/L	7.27	units	44	mm Hg
13760062	84	M	WHITE	84.2	173	Medicare	English	MARRIED	SICU	26.5	K/uL	5.42	m/uL	NULL	NULL	NULL	NULL	261.67	K/uL	15.83	g/dL	15.03	%	49.43	%	NULL	NULL	NULL	NULL	NULL	NULL	138	mEq/L	5.1	mEq/L	6.9	mg/dL	104.67	mEq/L	172	mg/dL	NULL	NULL	19	mEq/L	7.27	units	38	mm Hg
13770379	65	M	WHITE	77.8	NULL	Medicare	English	WIDOWED	MICU	10.5	K/uL	5.07	m/uL	NULL	NULL	NULL	NULL	98	K/uL	10.2	g/dL	16.4	%	32.2	%	NULL	NULL	NULL	NULL	NULL	NULL	141	mEq/L	4.6	mEq/L	8.6	mg/dL	107	mEq/L	155	mg/dL	NULL	NULL	8	mEq/L	7.35	units	47	mm Hg
13771788	57	M	UNKNOWN	83.75	183	NULL	English	NULL	MICU	9.5	K/uL	5.85	m/uL	NULL	NULL	NULL	NULL	226	K/uL	17.7	g/dL	13.7	%	55.3	%	3.4	g/dL	NULL	NULL	NULL	NULL	125.75	mEq/L	4.7	mEq/L	8.6	mg/dL	82	mEq/L	78	mg/dL	6.3	%	6	mEq/L	7.33	units	70.17	mm Hg
13774806	58	F	WHITE	54.5	NULL	Medicaid	English	DIVORCED	TSICU	12.8	K/uL	5.45	m/uL	NULL	NULL	NULL	NULL	235.5	K/uL	14.8	g/dL	17.95	%	49.3	%	NULL	NULL	NULL	NULL	NULL	NULL	139	mEq/L	4.35	mEq/L	9	mg/dL	99	mEq/L	118.5	mg/dL	NULL	NULL	12.5	mEq/L	7.34	units	52.5	mm Hg
13778259	58	F	WHITE	40.3	157	Medicaid	English	SINGLE	TSICU	11.98	K/uL	3.06	m/uL	NULL	NULL	NULL	NULL	93.83	K/uL	8.75	g/dL	14.72	%	25.67	%	NULL	NULL	NULL	NULL	NULL	NULL	144.4	mEq/L	4.32	mEq/L	8.92	mg/dL	105.8	mEq/L	94.8	mg/dL	NULL	NULL	13.6	mEq/L	7.42	units	42.5	mm Hg
13779191	77	M	WHITE	77.6	NULL	Medicare	English	SINGLE	CCU	7.65	K/uL	3.78	m/uL	7.97	K/uL	0.47	K/uL	183.5	K/uL	11.35	g/dL	17.35	%	36.95	%	NULL	NULL	NULL	NULL	NULL	NULL	141	mEq/L	3.5	mEq/L	7	mg/dL	110	mEq/L	79	mg/dL	NULL	NULL	10	mEq/L	NULL	NULL	NULL	NULL
13779244	74	F	WHITE	47.9	NULL	Medicare	English	WIDOWED	MICU	11.1	K/uL	4.66	m/uL	9.24	K/uL	0.46	K/uL	333	K/uL	13.4	g/dL	19.1	%	41.7	%	NULL	NULL	NULL	NULL	NULL	NULL	142.5	mEq/L	5.05	mEq/L	7.95	mg/dL	110	mEq/L	140	mg/dL	NULL	NULL	12	mEq/L	7.31	units	45.33	mm Hg
13782006	61	F	WHITE	69.6	152	Medicaid	English	DIVORCED	TSICU	14.39	K/uL	3.57	m/uL	10.27	K/uL	1.43	K/uL	283.71	K/uL	8.73	g/dL	14.64	%	29.1	%	2.3	g/dL	NULL	NULL	NULL	NULL	129.75	mEq/L	4.85	mEq/L	6.84	mg/dL	96.63	mEq/L	160.5	mg/dL	NULL	NULL	9.38	mEq/L	7.32	units	49.33	mm Hg
13783190	73	F	HISPANIC/LATINO - PUERTO RICAN	91.1	NULL	Medicaid	Spanish	SINGLE	SICU	14.75	K/uL	2.57	m/uL	NULL	NULL	NULL	NULL	187	K/uL	7.8	g/dL	14.95	%	24.45	%	2.63	g/dL	NULL	NULL	NULL	NULL	140.67	mEq/L	4.07	mEq/L	8.56	mg/dL	98.33	mEq/L	127.33	mg/dL	NULL	NULL	13.67	mEq/L	7.39	units	50	mm Hg
13786783	56	M	WHITE	99	NULL	Medicaid	English	SINGLE	TSICU	8.2	K/uL	4.33	m/uL	NULL	NULL	NULL	NULL	214.5	K/uL	14.55	g/dL	12.9	%	42.75	%	NULL	NULL	NULL	NULL	NULL	NULL	138	mEq/L	4.45	mEq/L	9.4	mg/dL	94	mEq/L	104	mg/dL	NULL	NULL	18	mEq/L	NULL	NULL	NULL	NULL
13786910	56	F	WHITE - OTHER EUROPEAN	54	NULL	Private	English	MARRIED	Neuro Intermediate	9.2	K/uL	3.33	m/uL	NULL	NULL	NULL	NULL	184	K/uL	10.5	g/dL	13	%	29.5	%	NULL	NULL	NULL	NULL	NULL	NULL	140	mEq/L	3.8	mEq/L	8.4	mg/dL	108	mEq/L	88	mg/dL	NULL	NULL	9	mEq/L	NULL	NULL	NULL	NULL
13788978	82	M	WHITE	67	168	Medicare	English	SINGLE	SICU	11.73	K/uL	4.09	m/uL	9.86	K/uL	1.26	K/uL	175.67	K/uL	10.27	g/dL	19.4	%	31.97	%	NULL	NULL	NULL	NULL	NULL	NULL	138.5	mEq/L	3.55	mEq/L	7.55	mg/dL	99	mEq/L	87.5	mg/dL	NULL	NULL	12	mEq/L	7.46	units	40	mm Hg
13798332	77	M	WHITE - OTHER EUROPEAN	79.35	NULL	Medicare	English	MARRIED	MICU/SICU	0.3	K/uL	2.37	m/uL	0	K/uL	0.29	K/uL	10.67	K/uL	6.8	g/dL	16.77	%	19.8	%	1.9	g/dL	NULL	NULL	NULL	NULL	143	mEq/L	3.57	mEq/L	7.2	mg/dL	114	mEq/L	118	mg/dL	NULL	NULL	12	mEq/L	7.49	units	25.5	mm Hg
13798580	76	M	BLACK/CAPE VERDEAN	97	178	Medicare	Kabuverdianu	MARRIED	MICU	9.95	K/uL	2.73	m/uL	NULL	NULL	NULL	NULL	154	K/uL	7.9	g/dL	18.85	%	26.35	%	NULL	NULL	NULL	NULL	NULL	NULL	146	mEq/L	3.6	mEq/L	8.8	mg/dL	95	mEq/L	102	mg/dL	NULL	NULL	9	mEq/L	7.44	units	68	mm Hg
13799291	49	F	WHITE	61.2	NULL	Medicaid	English	SINGLE	Neuro Intermediate	11.95	K/uL	3.34	m/uL	NULL	NULL	NULL	NULL	233.5	K/uL	10.05	g/dL	13.45	%	31.15	%	NULL	NULL	NULL	NULL	NULL	NULL	140.5	mEq/L	3.6	mEq/L	8.2	mg/dL	106.5	mEq/L	103	mg/dL	NULL	NULL	13	mEq/L	NULL	NULL	NULL	NULL
13800187	91	M	WHITE	89	165	Medicare	English	WIDOWED	TSICU	14	K/uL	2.4	m/uL	NULL	NULL	NULL	NULL	224	K/uL	7.6	g/dL	16.7	%	24	%	NULL	NULL	NULL	NULL	NULL	NULL	139	mEq/L	4	mEq/L	8	mg/dL	104	mEq/L	122	mg/dL	NULL	NULL	11	mEq/L	7.39	units	40.33	mm Hg
13802300	44	F	WHITE	73.9	NULL	Medicaid	English	SINGLE	MICU	13.85	K/uL	4.66	m/uL	10.28	K/uL	1.61	K/uL	209	K/uL	11.45	g/dL	15.9	%	38.2	%	3.85	g/dL	NULL	NULL	NULL	NULL	138.33	mEq/L	4.3	mEq/L	8.35	mg/dL	104	mEq/L	90.33	mg/dL	NULL	NULL	12.33	mEq/L	7.3	units	52	mm Hg
13811522	90	M	WHITE	78.4	NULL	Medicare	English	NULL	Neuro Stepdown	6.5	K/uL	4.42	m/uL	NULL	NULL	NULL	NULL	125	K/uL	13.5	g/dL	12.7	%	41.9	%	NULL	NULL	NULL	NULL	NULL	NULL	140	mEq/L	3	mEq/L	9.3	mg/dL	97	mEq/L	100	mg/dL	NULL	NULL	20	mEq/L	NULL	NULL	NULL	NULL
13815310	70	M	UNKNOWN	93.8	NULL	Other	English	NULL	MICU	4.5	K/uL	5.8	m/uL	NULL	NULL	NULL	NULL	110	K/uL	17	g/dL	18.3	%	59.6	%	NULL	NULL	NULL	NULL	NULL	NULL	136	mEq/L	6.4	mEq/L	8.3	mg/dL	92	mEq/L	89	mg/dL	NULL	NULL	14	mEq/L	7.19	units	102	mm Hg
13816871	55	M	BLACK/AFRICAN AMERICAN	52	NULL	Medicaid	Spanish	NULL	MICU	9.6	K/uL	2.07	m/uL	NULL	NULL	NULL	NULL	49.75	K/uL	7.3	g/dL	27.08	%	21.48	%	2	g/dL	NULL	NULL	NULL	NULL	139.33	mEq/L	4.13	mEq/L	7.33	mg/dL	109.67	mEq/L	88.33	mg/dL	NULL	NULL	15.67	mEq/L	7.33	units	26.67	mm Hg
13817697	73	F	WHITE	87.2	NULL	Medicaid	English	WIDOWED	MICU/SICU	15.35	K/uL	3.18	m/uL	NULL	NULL	NULL	NULL	334	K/uL	9.55	g/dL	16.45	%	28.1	%	NULL	NULL	NULL	NULL	NULL	NULL	138	mEq/L	3.7	mEq/L	7.2	mg/dL	107	mEq/L	119	mg/dL	NULL	NULL	12	mEq/L	7.31	units	48	mm Hg
13817882	81	M	BLACK/AFRICAN AMERICAN	61.9	168	Medicare	English	SINGLE	Neuro Stepdown	6	K/uL	3.97	m/uL	NULL	NULL	NULL	NULL	223	K/uL	10.9	g/dL	16.7	%	34.9	%	NULL	NULL	NULL	NULL	NULL	NULL	149	mEq/L	3.4	mEq/L	8	mg/dL	114	mEq/L	92	mg/dL	NULL	NULL	11	mEq/L	7.43	units	41	mm Hg
13819797	68	M	WHITE	78.5	178	Medicare	English	MARRIED	CCU	16.5	K/uL	3.9	m/uL	NULL	NULL	NULL	NULL	95	K/uL	13.2	g/dL	12.6	%	40.1	%	3.6	g/dL	NULL	NULL	NULL	NULL	139	mEq/L	4.2	mEq/L	7.8	mg/dL	103.5	mEq/L	187	mg/dL	NULL	NULL	16.5	mEq/L	7.24	units	48.67	mm Hg
13821528	91	M	UNKNOWN	45.7	NULL	Medicare	English	MARRIED	MICU	9.95	K/uL	3.74	m/uL	8.02	K/uL	1.25	K/uL	262.5	K/uL	10.7	g/dL	16.2	%	33.75	%	3	g/dL	NULL	NULL	NULL	NULL	148	mEq/L	3.7	mEq/L	8.25	mg/dL	104.5	mEq/L	161	mg/dL	NULL	NULL	19.5	mEq/L	7.48	units	38	mm Hg
13824877	67	M	WHITE	62.4	170	Medicare	English	WIDOWED	Neuro Intermediate	11.6	K/uL	3.75	m/uL	NULL	NULL	NULL	NULL	333	K/uL	12.4	g/dL	14.4	%	37.9	%	NULL	NULL	NULL	NULL	NULL	NULL	136	mEq/L	4.7	mEq/L	9.1	mg/dL	96	mEq/L	90	mg/dL	NULL	NULL	15	mEq/L	NULL	NULL	NULL	NULL
13827385	57	F	WHITE	47.4	NULL	Private	English	DIVORCED	Neuro Intermediate	11.1	K/uL	3.55	m/uL	NULL	NULL	NULL	NULL	205	K/uL	12.1	g/dL	12.9	%	36.1	%	NULL	NULL	NULL	NULL	NULL	NULL	141	mEq/L	3.9	mEq/L	8.1	mg/dL	109	mEq/L	94	mg/dL	NULL	NULL	10	mEq/L	NULL	NULL	NULL	NULL
13830055	85	M	WHITE	72.4	175	Medicare	English	MARRIED	MICU/SICU	16.9	K/uL	3.38	m/uL	NULL	NULL	NULL	NULL	241.5	K/uL	10.3	g/dL	14.35	%	32.5	%	NULL	NULL	NULL	NULL	NULL	NULL	138	mEq/L	5.15	mEq/L	9.1	mg/dL	96	mEq/L	152	mg/dL	NULL	NULL	13.5	mEq/L	7.3	units	67.25	mm Hg
13831349	79	F	UNKNOWN	111.55	183	Medicare	English	SINGLE	MICU/SICU	12.6	K/uL	3.63	m/uL	NULL	NULL	NULL	NULL	222	K/uL	10.2	g/dL	15.2	%	36.3	%	NULL	NULL	NULL	NULL	NULL	NULL	141.5	mEq/L	4.6	mEq/L	10.4	mg/dL	95.5	mEq/L	120.5	mg/dL	NULL	NULL	10.5	mEq/L	7.36	units	80	mm Hg
13834308	62	F	WHITE	56.85	NULL	Private	English	SINGLE	SICU	18.2	K/uL	3.91	m/uL	16.88	K/uL	0.86	K/uL	285	K/uL	11.8	g/dL	12.9	%	36.2	%	3.7	g/dL	NULL	NULL	NULL	NULL	138	mEq/L	4.75	mEq/L	9.15	mg/dL	103	mEq/L	154	mg/dL	NULL	NULL	21	mEq/L	7.28	units	48	mm Hg
13840756	61	F	WHITE	54.5	NULL	Private	English	SINGLE	MICU/SICU	11.2	K/uL	3.95	m/uL	NULL	NULL	NULL	NULL	219	K/uL	12.5	g/dL	13.7	%	40	%	NULL	NULL	NULL	NULL	NULL	NULL	144	mEq/L	4.7	mEq/L	8.7	mg/dL	105	mEq/L	115	mg/dL	NULL	NULL	9	mEq/L	7.31	units	62	mm Hg
13844924	94	M	WHITE	66.7	191	Medicare	English	WIDOWED	Neuro Intermediate	9.5	K/uL	3.73	m/uL	NULL	NULL	NULL	NULL	233	K/uL	12.2	g/dL	13.5	%	36.8	%	NULL	NULL	NULL	NULL	NULL	NULL	138	mEq/L	3.7	mEq/L	9	mg/dL	104	mEq/L	111	mg/dL	5.8	%	10	mEq/L	NULL	NULL	NULL	NULL
13845707	82	M	WHITE	NULL	NULL	Medicare	English	MARRIED	CCU	68.63	K/uL	3.77	m/uL	NULL	NULL	NULL	NULL	342	K/uL	9.93	g/dL	32.97	%	32.13	%	3.3	g/dL	NULL	NULL	NULL	NULL	136	mEq/L	4.97	mEq/L	9.27	mg/dL	99	mEq/L	123.33	mg/dL	NULL	NULL	11.33	mEq/L	7.35	units	43	mm Hg
13847826	68	F	WHITE	79.8	163	Medicare	English	WIDOWED	MICU	24.43	K/uL	2.88	m/uL	NULL	NULL	NULL	NULL	394	K/uL	8.9	g/dL	14.1	%	28.03	%	NULL	NULL	NULL	NULL	NULL	NULL	137.67	mEq/L	4.33	mEq/L	7.93	mg/dL	105	mEq/L	119	mg/dL	NULL	NULL	16.33	mEq/L	7.29	units	44	mm Hg
13851160	56	M	UNABLE TO OBTAIN	71.6	152	Medicaid	English	NULL	CVICU	23.87	K/uL	2.5	m/uL	23.02	K/uL	1.77	K/uL	224	K/uL	7.77	g/dL	13.03	%	23.85	%	NULL	NULL	NULL	NULL	NULL	NULL	128	mEq/L	4.9	mEq/L	NULL	NULL	99.5	mEq/L	148	mg/dL	NULL	NULL	4.5	mEq/L	7.33	units	48.79	mm Hg
13857698	74	M	WHITE	68.4	NULL	Medicare	English	SINGLE	MICU/SICU	13.15	K/uL	3.54	m/uL	NULL	NULL	NULL	NULL	152	K/uL	11.55	g/dL	14.35	%	32.3	%	NULL	NULL	NULL	NULL	NULL	NULL	137.5	mEq/L	4.2	mEq/L	7.95	mg/dL	103.5	mEq/L	119	mg/dL	NULL	NULL	10.5	mEq/L	7.38	units	41	mm Hg
13861581	67	M	WHITE	94	NULL	Medicare	English	SINGLE	MICU/SICU	8.4	K/uL	4.72	m/uL	NULL	NULL	NULL	NULL	129	K/uL	11.7	g/dL	16	%	39.4	%	3.6	g/dL	NULL	NULL	NULL	NULL	140	mEq/L	4.05	mEq/L	10.05	mg/dL	97.5	mEq/L	129	mg/dL	NULL	NULL	12	mEq/L	7.34	units	68	mm Hg
13865397	89	F	WHITE	60.2	NULL	Medicare	English	DIVORCED	TSICU	9.9	K/uL	4.34	m/uL	NULL	NULL	NULL	NULL	189	K/uL	10.8	g/dL	19	%	37.8	%	NULL	NULL	NULL	NULL	NULL	NULL	143	mEq/L	4.8	mEq/L	9.4	mg/dL	106	mEq/L	99	mg/dL	NULL	NULL	14	mEq/L	NULL	NULL	NULL	NULL
13866385	66	M	UNABLE TO OBTAIN	93.5	185	Medicare	English	NULL	Neuro Intermediate	18.1	K/uL	4.29	m/uL	NULL	NULL	NULL	NULL	141	K/uL	13.9	g/dL	14	%	43.3	%	3.6	g/dL	NULL	NULL	NULL	NULL	145	mEq/L	5.1	mEq/L	7.9	mg/dL	112	mEq/L	95	mg/dL	NULL	NULL	11	mEq/L	7.35	units	45.5	mm Hg
13869999	80	F	WHITE	78.6	157	Medicare	English	SINGLE	TSICU	9.7	K/uL	4.18	m/uL	3.95	K/uL	0.13	K/uL	284.5	K/uL	11.7	g/dL	16	%	36.45	%	NULL	NULL	NULL	NULL	NULL	NULL	138	mEq/L	4.15	mEq/L	7.7	mg/dL	105	mEq/L	81.5	mg/dL	NULL	NULL	14	mEq/L	7.32	units	38	mm Hg
13871299	61	M	BLACK/AFRICAN AMERICAN	68.6	183	Medicaid	English	SINGLE	CCU	12.8	K/uL	3.89	m/uL	NULL	NULL	NULL	NULL	130	K/uL	12.6	g/dL	13.6	%	35.7	%	NULL	NULL	NULL	NULL	NULL	NULL	142	mEq/L	4.7	mEq/L	9.5	mg/dL	107	mEq/L	144	mg/dL	NULL	NULL	20	mEq/L	NULL	NULL	NULL	NULL
13871390	62	M	WHITE	49.4	NULL	Medicare	English	DIVORCED	SICU	10	K/uL	3	m/uL	10.7	K/uL	0.59	K/uL	342.5	K/uL	8.85	g/dL	15.65	%	28.35	%	3.3	g/dL	NULL	NULL	NULL	NULL	132.5	mEq/L	3.95	mEq/L	9.05	mg/dL	93	mEq/L	140	mg/dL	NULL	NULL	14	mEq/L	7.39	units	51	mm Hg
13875070	69	M	WHITE	69.3	NULL	Medicare	English	DIVORCED	MICU/SICU	9	K/uL	3.24	m/uL	NULL	NULL	NULL	NULL	162.5	K/uL	9.5	g/dL	16.3	%	29.9	%	NULL	NULL	NULL	NULL	NULL	NULL	138.5	mEq/L	3.55	mEq/L	7.7	mg/dL	103.5	mEq/L	87.5	mg/dL	NULL	NULL	5.5	mEq/L	NULL	NULL	NULL	NULL
13877180	56	M	WHITE	160.1	191	Medicaid	English	SINGLE	MICU/SICU	15.95	K/uL	4.7	m/uL	NULL	NULL	NULL	NULL	216.5	K/uL	15.2	g/dL	13.75	%	43.9	%	3.6	g/dL	NULL	NULL	NULL	NULL	138.67	mEq/L	2.77	mEq/L	8.8	mg/dL	95.67	mEq/L	106.33	mg/dL	NULL	NULL	16.33	mEq/L	7.39	units	49.67	mm Hg
13887127	79	M	HISPANIC/LATINO - PUERTO RICAN	67	NULL	Medicare	Spanish	SINGLE	MICU	NULL	NULL	NULL	NULL	NULL	NULL	NULL	NULL	NULL	NULL	NULL	NULL	NULL	NULL	NULL	NULL	NULL	NULL	NULL	NULL	NULL	NULL	NULL	NULL	NULL	NULL	NULL	NULL	NULL	NULL	NULL	NULL	NULL	NULL	NULL	NULL	7.4	units	48	mm Hg
13894895	75	M	WHITE	61.9	NULL	Medicare	English	SINGLE	SICU	6.85	K/uL	2.98	m/uL	NULL	NULL	NULL	NULL	215	K/uL	8.75	g/dL	17.85	%	29.1	%	NULL	NULL	NULL	NULL	NULL	NULL	140.5	mEq/L	4.35	mEq/L	7.2	mg/dL	104	mEq/L	127.5	mg/dL	4.8	%	12.5	mEq/L	NULL	NULL	NULL	NULL
13900768	92	M	ASIAN	40.6	NULL	Medicare	Chinese	MARRIED	MICU	10.7	K/uL	4.05	m/uL	9.7	K/uL	0.53	K/uL	188	K/uL	11.6	g/dL	16.3	%	39.3	%	NULL	NULL	NULL	NULL	NULL	NULL	160	mEq/L	4.1	mEq/L	8.4	mg/dL	127	mEq/L	214	mg/dL	NULL	NULL	12	mEq/L	7.34	units	45	mm Hg
13902474	78	F	WHITE	97.3	164	Medicare	English	SINGLE	MICU/SICU	14.7	K/uL	2.58	m/uL	12.2	K/uL	1.11	K/uL	256	K/uL	7.9	g/dL	16.7	%	24.9	%	NULL	NULL	NULL	NULL	NULL	NULL	135	mEq/L	4.65	mEq/L	8.8	mg/dL	91.5	mEq/L	72	mg/dL	NULL	NULL	17.5	mEq/L	7.44	units	43	mm Hg
13915302	73	F	WHITE	55.7	NULL	Medicare	English	SINGLE	TSICU	7.03	K/uL	3.1	m/uL	NULL	NULL	NULL	NULL	111.33	K/uL	9.4	g/dL	13.13	%	29.87	%	NULL	NULL	NULL	NULL	NULL	NULL	139	mEq/L	4.8	mEq/L	8.3	mg/dL	106	mEq/L	148	mg/dL	NULL	NULL	10	mEq/L	7.31	units	48	mm Hg
13920430	71	F	WHITE	64	155	Private	English	MARRIED	CVICU	13	K/uL	3.73	m/uL	6.28	K/uL	4.26	K/uL	165.25	K/uL	9.98	g/dL	13.8	%	29.45	%	NULL	NULL	NULL	NULL	NULL	NULL	129.67	mEq/L	4.85	mEq/L	9.1	mg/dL	96.5	mEq/L	116.67	mg/dL	NULL	NULL	16.5	mEq/L	7.34	units	40.67	mm Hg
13925484	93	M	WHITE	69.9	180	Medicare	English	MARRIED	MICU/SICU	5.5	K/uL	2.8	m/uL	NULL	NULL	NULL	NULL	185	K/uL	9.3	g/dL	15.4	%	29	%	NULL	NULL	NULL	NULL	NULL	NULL	135.5	mEq/L	3.95	mEq/L	8.55	mg/dL	91.5	mEq/L	95	mg/dL	NULL	NULL	10	mEq/L	7.4	units	66	mm Hg
13929170	65	M	WHITE	68	NULL	Medicare	English	MARRIED	TSICU	13.8	K/uL	4.65	m/uL	11.44	K/uL	0.95	K/uL	247	K/uL	14.9	g/dL	14.15	%	46.75	%	NULL	NULL	NULL	NULL	NULL	NULL	134	mEq/L	4.7	mEq/L	7.8	mg/dL	95.33	mEq/L	116.33	mg/dL	NULL	NULL	9.33	mEq/L	NULL	NULL	NULL	NULL
13930782	60	F	UNKNOWN	45	NULL	Medicaid	English	NULL	MICU/SICU	7.15	K/uL	4.48	m/uL	NULL	NULL	NULL	NULL	257	K/uL	14.45	g/dL	13.35	%	43.65	%	4.3	g/dL	NULL	NULL	NULL	NULL	142	mEq/L	5.37	mEq/L	9.27	mg/dL	101	mEq/L	100.67	mg/dL	NULL	NULL	10.67	mEq/L	7.37	units	54.5	mm Hg
13931791	78	M	WHITE - OTHER EUROPEAN	74.45	175	Medicare	English	SINGLE	CVICU	6.7	K/uL	4.16	m/uL	NULL	NULL	NULL	NULL	109.67	K/uL	13.4	g/dL	12.2	%	37.65	%	NULL	NULL	NULL	NULL	NULL	NULL	138	mEq/L	3.8	mEq/L	8.55	mg/dL	104	mEq/L	101.5	mg/dL	NULL	NULL	12.5	mEq/L	NULL	NULL	NULL	NULL
13934321	80	M	WHITE	148.433	180	Medicare	English	MARRIED	CCU	17.24	K/uL	3.35	m/uL	NULL	NULL	NULL	NULL	123.4	K/uL	10.26	g/dL	14.98	%	30.48	%	NULL	NULL	NULL	NULL	NULL	NULL	138.33	mEq/L	5.34	mEq/L	8.53	mg/dL	102.5	mEq/L	145.83	mg/dL	NULL	NULL	13.5	mEq/L	7.33	units	47.08	mm Hg
13937204	71	F	WHITE	56.4	NULL	Medicare	English	MARRIED	MICU/SICU	7.35	K/uL	2.31	m/uL	6.3	K/uL	0.13	K/uL	68	K/uL	7.5	g/dL	16.5	%	23.7	%	NULL	NULL	NULL	NULL	NULL	NULL	139.5	mEq/L	3.7	mEq/L	7	mg/dL	108.5	mEq/L	123.5	mg/dL	NULL	NULL	16	mEq/L	NULL	NULL	NULL	NULL
13940027	92	F	WHITE	63.7	157	Medicare	English	SINGLE	MICU/SICU	8.7	K/uL	3.54	m/uL	NULL	NULL	NULL	NULL	224	K/uL	10.9	g/dL	13.1	%	33.4	%	NULL	NULL	NULL	NULL	NULL	NULL	140	mEq/L	5.1	mEq/L	8.9	mg/dL	105	mEq/L	141	mg/dL	NULL	NULL	14	mEq/L	7.38	units	44	mm Hg
13949608	76	F	UNABLE TO OBTAIN	43	157	Private	English	NULL	TSICU	12.5	K/uL	4.33	m/uL	NULL	NULL	NULL	NULL	255.5	K/uL	12.65	g/dL	13.45	%	40.4	%	NULL	NULL	NULL	NULL	NULL	NULL	135.33	mEq/L	3.97	mEq/L	9.27	mg/dL	94.67	mEq/L	109.33	mg/dL	5.5	%	15	mEq/L	NULL	NULL	NULL	NULL
13952656	85	F	WHITE	41.8	NULL	Medicare	English	WIDOWED	Neuro Intermediate	4.8	K/uL	3.11	m/uL	NULL	NULL	NULL	NULL	178	K/uL	9	g/dL	17.2	%	30.1	%	NULL	NULL	NULL	NULL	NULL	NULL	140	mEq/L	4.6	mEq/L	8.4	mg/dL	107	mEq/L	183	mg/dL	NULL	NULL	11	mEq/L	NULL	NULL	NULL	NULL
13952926	85	M	UNABLE TO OBTAIN	67	NULL	Medicare	English	MARRIED	CCU	8.3	K/uL	3.56	m/uL	NULL	NULL	NULL	NULL	217	K/uL	11.6	g/dL	13.6	%	35	%	NULL	NULL	NULL	NULL	NULL	NULL	136	mEq/L	4	mEq/L	9.45	mg/dL	92	mEq/L	107.5	mg/dL	5.4	%	9.5	mEq/L	NULL	NULL	NULL	NULL
13962231	66	F	WHITE - OTHER EUROPEAN	85	NULL	Medicare	English	SINGLE	CVICU	6.67	K/uL	3.27	m/uL	5.23	K/uL	0.8	K/uL	106.33	K/uL	10.37	g/dL	17.23	%	32.5	%	3.3	g/dL	NULL	NULL	NULL	NULL	135.25	mEq/L	3.78	mEq/L	8.53	mg/dL	99	mEq/L	149	mg/dL	NULL	NULL	11.75	mEq/L	7.37	units	43.5	mm Hg
13963966	73	M	WHITE	64.4	180	Medicare	English	DIVORCED	MICU/SICU	5.5	K/uL	4.2	m/uL	2.75	K/uL	1.4	K/uL	148.5	K/uL	12.8	g/dL	15	%	37.25	%	2.3	g/dL	NULL	NULL	NULL	NULL	128.6	mEq/L	3.24	mEq/L	7.6	mg/dL	96	mEq/L	96.4	mg/dL	NULL	NULL	14.6	mEq/L	7.39	units	39	mm Hg
13964502	52	M	HISPANIC/LATINO - PUERTO RICAN	83.6	180	Medicaid	English	SINGLE	CVICU	12.3	K/uL	3.42	m/uL	6.46	K/uL	4.26	K/uL	134.33	K/uL	9.88	g/dL	12.23	%	29.18	%	NULL	NULL	NULL	NULL	NULL	NULL	137	mEq/L	6.5	mEq/L	7.7	mg/dL	106.5	mEq/L	145	mg/dL	NULL	NULL	9	mEq/L	7.34	units	44.29	mm Hg
13965637	77	M	WHITE	65	NULL	Medicare	English	MARRIED	CCU	8.85	K/uL	3.99	m/uL	8.42	K/uL	1.09	K/uL	210.25	K/uL	12.3	g/dL	13.28	%	36.98	%	NULL	NULL	NULL	NULL	NULL	NULL	138	mEq/L	3.6	mEq/L	8.53	mg/dL	103.33	mEq/L	96.67	mg/dL	NULL	NULL	15.67	mEq/L	7.38	units	40	mm Hg
13973304	95	F	WHITE	56.4	NULL	Medicare	English	WIDOWED	TSICU	4.3	K/uL	3.07	m/uL	NULL	NULL	NULL	NULL	160.5	K/uL	10.2	g/dL	14.65	%	31.93	%	NULL	NULL	NULL	NULL	NULL	NULL	139	mEq/L	4.2	mEq/L	9.1	mg/dL	100	mEq/L	92	mg/dL	NULL	NULL	12	mEq/L	NULL	NULL	NULL	NULL
13974723	66	M	BLACK/AFRICAN AMERICAN	69	NULL	Medicaid	English	SINGLE	MICU/SICU	14.95	K/uL	2.43	m/uL	11.93	K/uL	0.54	K/uL	156	K/uL	7.1	g/dL	18.65	%	23.15	%	2.5	g/dL	NULL	NULL	NULL	NULL	131	mEq/L	5.7	mEq/L	9.35	mg/dL	90.5	mEq/L	54.5	mg/dL	NULL	NULL	27.5	mEq/L	7.26	units	56	mm Hg
13975871	89	M	WHITE	82.5	NULL	Medicare	English	MARRIED	MICU	5.6	K/uL	3.98	m/uL	NULL	NULL	NULL	NULL	223	K/uL	12	g/dL	13.8	%	35.9	%	NULL	NULL	NULL	NULL	NULL	NULL	134	mEq/L	4.9	mEq/L	9	mg/dL	101	mEq/L	212	mg/dL	NULL	NULL	18	mEq/L	7.35	units	38	mm Hg
13982737	61	F	WHITE	80.7	NULL	Medicare	English	MARRIED	TSICU	9.4	K/uL	3.15	m/uL	NULL	NULL	NULL	NULL	151	K/uL	9.3	g/dL	14.3	%	28.1	%	NULL	NULL	NULL	NULL	NULL	NULL	135	mEq/L	4	mEq/L	7.3	mg/dL	101	mEq/L	102	mg/dL	NULL	NULL	10	mEq/L	7.39	units	46	mm Hg
13986738	79	M	WHITE	76.35	NULL	Medicare	English	MARRIED	TSICU	11.33	K/uL	3.23	m/uL	7.8	K/uL	0.64	K/uL	117.25	K/uL	9.94	g/dL	15.01	%	30.35	%	NULL	NULL	NULL	NULL	NULL	NULL	141.5	mEq/L	4.98	mEq/L	8.37	mg/dL	108	mEq/L	185.17	mg/dL	NULL	NULL	13.33	mEq/L	7.23	units	49	mm Hg
13987124	77	M	WHITE	103	180	Medicare	English	MARRIED	Neuro SICU	7.5	K/uL	3.28	m/uL	NULL	NULL	NULL	NULL	140	K/uL	10.2	g/dL	15.5	%	31.5	%	NULL	NULL	NULL	NULL	NULL	NULL	142	mEq/L	3.7	mEq/L	8.5	mg/dL	102	mEq/L	75	mg/dL	NULL	NULL	12	mEq/L	7.49	units	39	mm Hg
13993910	92	M	WHITE	89	185	Medicare	English	MARRIED	TSICU	11.67	K/uL	2.36	m/uL	10.91	K/uL	0.71	K/uL	540.33	K/uL	7.33	g/dL	14.97	%	23.17	%	NULL	NULL	NULL	NULL	NULL	NULL	142.33	mEq/L	4.67	mEq/L	7.97	mg/dL	109.33	mEq/L	121	mg/dL	NULL	NULL	17.33	mEq/L	7.36	units	53.5	mm Hg
13996279	57	F	WHITE - OTHER EUROPEAN	100.7	163	Medicaid	English	SINGLE	Neuro Intermediate	9.9	K/uL	3.91	m/uL	NULL	NULL	NULL	NULL	267	K/uL	11.7	g/dL	13.8	%	35.5	%	NULL	NULL	NULL	NULL	NULL	NULL	138	mEq/L	4	mEq/L	8.6	mg/dL	106	mEq/L	145	mg/dL	NULL	NULL	9	mEq/L	7.34	units	44.5	mm Hg
14001416	65	F	UNABLE TO OBTAIN	50.7	168	Medicare	English	NULL	MICU	7.1	K/uL	3.76	m/uL	NULL	NULL	NULL	NULL	119	K/uL	11.7	g/dL	13.3	%	35.5	%	3.1	g/dL	NULL	NULL	NULL	NULL	136	mEq/L	4.1	mEq/L	7.6	mg/dL	107	mEq/L	137	mg/dL	NULL	NULL	10	mEq/L	7.33	units	45.5	mm Hg
14003072	71	M	WHITE	65	NULL	Private	English	MARRIED	CCU	9.3	K/uL	4.09	m/uL	NULL	NULL	NULL	NULL	138	K/uL	9	g/dL	17.3	%	27.8	%	NULL	NULL	NULL	NULL	NULL	NULL	139.67	mEq/L	4.13	mEq/L	8.23	mg/dL	96.33	mEq/L	114.33	mg/dL	NULL	NULL	15	mEq/L	7.52	units	33	mm Hg
14004449	66	M	WHITE	82.9	NULL	Medicare	English	MARRIED	MICU	7	K/uL	4.2	m/uL	5.53	K/uL	0.76	K/uL	110.5	K/uL	10.95	g/dL	16.55	%	35.8	%	NULL	NULL	NULL	NULL	NULL	NULL	134.5	mEq/L	3.8	mEq/L	8.9	mg/dL	100.5	mEq/L	102	mg/dL	NULL	NULL	12	mEq/L	NULL	NULL	NULL	NULL
14007467	86	F	WHITE	56.4	160	Medicare	English	MARRIED	CVICU	5.8	K/uL	4.13	m/uL	NULL	NULL	NULL	NULL	157	K/uL	12.3	g/dL	14.2	%	39.4	%	NULL	NULL	NULL	NULL	NULL	NULL	144	mEq/L	3.95	mEq/L	8.55	mg/dL	106	mEq/L	107.5	mg/dL	5.7	%	14	mEq/L	7.41	units	42	mm Hg
14008725	73	M	BLACK/AFRICAN AMERICAN	86.6	NULL	Private	English	MARRIED	MICU/SICU	9	K/uL	3.29	m/uL	NULL	NULL	NULL	NULL	182	K/uL	9.4	g/dL	12.5	%	32.8	%	3.85	g/dL	NULL	NULL	NULL	NULL	139	mEq/L	5.1	mEq/L	9.2	mg/dL	94	mEq/L	108	mg/dL	NULL	NULL	9.5	mEq/L	7.28	units	85.5	mm Hg
14010625	74	M	WHITE	79.1	NULL	Medicare	English	DIVORCED	MICU/SICU	11.3	K/uL	2.59	m/uL	2.77	K/uL	1.31	K/uL	47	K/uL	7.6	g/dL	19.8	%	24.15	%	NULL	NULL	NULL	NULL	NULL	NULL	137.5	mEq/L	4.15	mEq/L	7.85	mg/dL	93	mEq/L	113	mg/dL	NULL	NULL	10	mEq/L	7.39	units	67	mm Hg
14011220	81	F	WHITE	42	163	Medicare	English	MARRIED	MICU	6.3	K/uL	5.07	m/uL	NULL	NULL	NULL	NULL	193	K/uL	12.8	g/dL	13.5	%	41.9	%	NULL	NULL	NULL	NULL	NULL	NULL	123	mEq/L	4.7	mEq/L	8.9	mg/dL	83	mEq/L	84	mg/dL	NULL	NULL	7	mEq/L	7.4	units	54.5	mm Hg
14011344	73	F	OTHER	77	173	Medicaid	Persian	MARRIED	MICU/SICU	NULL	NULL	NULL	NULL	NULL	NULL	NULL	NULL	NULL	NULL	NULL	NULL	NULL	NULL	NULL	NULL	NULL	NULL	NULL	NULL	NULL	NULL	NULL	NULL	NULL	NULL	NULL	NULL	NULL	NULL	NULL	NULL	NULL	NULL	NULL	NULL	NULL	NULL	NULL	NULL
14013445	49	F	BLACK/AFRICAN AMERICAN	49.2	160	Medicaid	English	SINGLE	Neuro Intermediate	9.8	K/uL	3.87	m/uL	NULL	NULL	NULL	NULL	349	K/uL	10.3	g/dL	18.1	%	33	%	NULL	NULL	NULL	NULL	NULL	NULL	138	mEq/L	4.5	mEq/L	9.7	mg/dL	98	mEq/L	115	mg/dL	NULL	NULL	12	mEq/L	NULL	NULL	NULL	NULL
14018431	79	M	OTHER	58.7	NULL	Medicare	English	MARRIED	MICU/SICU	14.7	K/uL	3.48	m/uL	NULL	NULL	NULL	NULL	258	K/uL	10.35	g/dL	13.5	%	35.45	%	NULL	NULL	NULL	NULL	NULL	NULL	143.5	mEq/L	3.8	mEq/L	9.3	mg/dL	100	mEq/L	122.5	mg/dL	NULL	NULL	10	mEq/L	7.39	units	66	mm Hg
14019298	81	M	WHITE	53	NULL	Medicare	English	SINGLE	MICU/SICU	14.8	K/uL	3.17	m/uL	17.09	K/uL	0.26	K/uL	224.5	K/uL	9.9	g/dL	15.1	%	30.5	%	2.1	g/dL	NULL	NULL	NULL	NULL	141	mEq/L	5.35	mEq/L	8.25	mg/dL	102	mEq/L	104	mg/dL	NULL	NULL	11	mEq/L	7.3	units	62.14	mm Hg
14029254	84	M	WHITE	81.1333	NULL	Medicare	English	WIDOWED	CCU	6.05	K/uL	4.55	m/uL	3.41	K/uL	0.64	K/uL	172	K/uL	15.05	g/dL	17.35	%	45.3	%	3.75	g/dL	NULL	NULL	NULL	NULL	135.5	mEq/L	4.63	mEq/L	8.85	mg/dL	99.5	mEq/L	95.5	mg/dL	6.3	%	12	mEq/L	NULL	NULL	NULL	NULL
14029699	68	F	WHITE	97.2	150	Medicaid	English	WIDOWED	MICU	15.05	K/uL	4.07	m/uL	12.52	K/uL	1.55	K/uL	221	K/uL	12.15	g/dL	13.95	%	39.3	%	NULL	NULL	NULL	NULL	NULL	NULL	144	mEq/L	4.1	mEq/L	8.75	mg/dL	104.5	mEq/L	91	mg/dL	NULL	NULL	13	mEq/L	7.36	units	49.8	mm Hg
14034200	76	F	WHITE	121.8	NULL	Medicare	English	WIDOWED	TSICU	13.67	K/uL	4.91	m/uL	9.28	K/uL	0.24	K/uL	282.67	K/uL	12.87	g/dL	17.7	%	42.93	%	NULL	NULL	NULL	NULL	NULL	NULL	136.67	mEq/L	4.27	mEq/L	8.27	mg/dL	98	mEq/L	81	mg/dL	NULL	NULL	17.67	mEq/L	7.35	units	44.6	mm Hg
14039848	56	F	WHITE	79.8	168	Medicaid	English	DIVORCED	MICU	9.4	K/uL	3.92	m/uL	NULL	NULL	NULL	NULL	147	K/uL	12.4	g/dL	13.7	%	38.75	%	3.5	g/dL	NULL	NULL	NULL	NULL	138.67	mEq/L	3.77	mEq/L	7.93	mg/dL	108.67	mEq/L	108	mg/dL	NULL	NULL	10	mEq/L	7.33	units	40.57	mm Hg
14040463	65	F	WHITE	52.4	NULL	Medicare	English	SINGLE	MICU/SICU	12.1	K/uL	3.53	m/uL	NULL	NULL	NULL	NULL	300	K/uL	10.25	g/dL	14.8	%	31.65	%	NULL	NULL	NULL	NULL	NULL	NULL	138.5	mEq/L	4.25	mEq/L	8.7	mg/dL	100.5	mEq/L	110.5	mg/dL	NULL	NULL	11	mEq/L	NULL	NULL	NULL	NULL
14044163	72	M	UNKNOWN	90.2	170	Private	English	NULL	CCU	16.65	K/uL	3.76	m/uL	15.35	K/uL	0.6	K/uL	213	K/uL	11.85	g/dL	13.9	%	36.7	%	NULL	NULL	NULL	NULL	NULL	NULL	139.33	mEq/L	5.2	mEq/L	8.17	mg/dL	105	mEq/L	123.67	mg/dL	NULL	NULL	9.67	mEq/L	7.38	units	44.5	mm Hg
14047281	87	M	WHITE - OTHER EUROPEAN	69.6	NULL	Medicare	English	WIDOWED	MICU/SICU	7.9	K/uL	3.61	m/uL	6.92	K/uL	0.36	K/uL	210	K/uL	11.7	g/dL	14.1	%	35.9	%	NULL	NULL	NULL	NULL	NULL	NULL	141	mEq/L	3.9	mEq/L	8.25	mg/dL	101.5	mEq/L	151.5	mg/dL	NULL	NULL	15	mEq/L	7.49	units	38	mm Hg
14050331	64	M	WHITE	70.7	NULL	Private	English	MARRIED	MICU	16.53	K/uL	3.22	m/uL	14.31	K/uL	0.7	K/uL	536	K/uL	8.03	g/dL	17.43	%	26.7	%	2.1	g/dL	NULL	NULL	NULL	NULL	142	mEq/L	3.72	mEq/L	7.83	mg/dL	104.4	mEq/L	108	mg/dL	NULL	NULL	15.4	mEq/L	NULL	NULL	NULL	NULL
14051283	75	M	ASIAN	56.45	NULL	Medicare	Korean	MARRIED	SICU	6.63	K/uL	4.56	m/uL	NULL	NULL	NULL	NULL	267.75	K/uL	14.05	g/dL	13.43	%	41.15	%	NULL	NULL	NULL	NULL	NULL	NULL	137.25	mEq/L	4.05	mEq/L	8.65	mg/dL	99.75	mEq/L	118.25	mg/dL	NULL	NULL	12.25	mEq/L	7.35	units	50.5	mm Hg
14052692	83	F	WHITE	56	152	Medicare	English	SINGLE	TSICU	13.43	K/uL	3.67	m/uL	NULL	NULL	NULL	NULL	516.67	K/uL	11.27	g/dL	15.87	%	36.8	%	3.3	g/dL	NULL	NULL	NULL	NULL	139	mEq/L	3.8	mEq/L	8.6	mg/dL	105	mEq/L	99	mg/dL	NULL	NULL	14	mEq/L	NULL	NULL	NULL	NULL
14053179	55	M	UNABLE TO OBTAIN	63.7	165	Private	Khmer	DIVORCED	CVICU	11.2	K/uL	3.42	m/uL	NULL	NULL	NULL	NULL	107	K/uL	9.3	g/dL	13.4	%	27.68	%	NULL	NULL	NULL	NULL	NULL	NULL	139	mEq/L	5.15	mEq/L	7.8	mg/dL	110.5	mEq/L	95	mg/dL	5.9	%	7.5	mEq/L	7.36	units	43.5	mm Hg
14057482	60	M	WHITE	83.7	NULL	Private	English	MARRIED	MICU/SICU	8	K/uL	2.79	m/uL	NULL	NULL	NULL	NULL	170	K/uL	8.7	g/dL	17.8	%	27.1	%	NULL	NULL	NULL	NULL	NULL	NULL	139	mEq/L	3.9	mEq/L	9.4	mg/dL	101	mEq/L	108	mg/dL	NULL	NULL	10	mEq/L	NULL	NULL	NULL	NULL
14061397	89	M	WHITE	67.6	NULL	Medicare	English	WIDOWED	MICU/SICU	18.6	K/uL	3.45	m/uL	15.48	K/uL	1.75	K/uL	142	K/uL	10	g/dL	17.2	%	33.5	%	NULL	NULL	NULL	NULL	NULL	NULL	137	mEq/L	4.1	mEq/L	10.2	mg/dL	102	mEq/L	89	mg/dL	NULL	NULL	17	mEq/L	NULL	NULL	NULL	NULL
14066295	80	F	WHITE	90.6	NULL	Medicare	English	DIVORCED	CCU	9	K/uL	3.96	m/uL	NULL	NULL	NULL	NULL	227.33	K/uL	11.8	g/dL	14.07	%	37.3	%	NULL	NULL	NULL	NULL	NULL	NULL	141	mEq/L	4.15	mEq/L	9.3	mg/dL	105.5	mEq/L	98	mg/dL	NULL	NULL	11.5	mEq/L	7.41	units	47.5	mm Hg
14066721	76	F	UNABLE TO OBTAIN	48.5	NULL	Medicare	English	MARRIED	Neuro Intermediate	7.5	K/uL	3.11	m/uL	NULL	NULL	NULL	NULL	276	K/uL	10.8	g/dL	14.6	%	32	%	NULL	NULL	NULL	NULL	NULL	NULL	136	mEq/L	3.45	mEq/L	8.75	mg/dL	96.5	mEq/L	106.5	mg/dL	4.5	%	14.5	mEq/L	7.37	units	48	mm Hg
14066931	91	F	WHITE	75	155	Medicare	English	WIDOWED	CCU	17.2	K/uL	2.81	m/uL	NULL	NULL	NULL	NULL	372	K/uL	8.7	g/dL	25.3	%	27.2	%	NULL	NULL	NULL	NULL	NULL	NULL	141	mEq/L	5	mEq/L	8.65	mg/dL	105	mEq/L	131	mg/dL	NULL	NULL	15	mEq/L	7.36	units	39.5	mm Hg
14067967	77	M	WHITE	92	178	Medicare	English	MARRIED	CCU	4.1	K/uL	3.15	m/uL	NULL	NULL	NULL	NULL	77	K/uL	9.9	g/dL	17.4	%	34.7	%	2.8	g/dL	NULL	NULL	NULL	NULL	137.67	mEq/L	3.87	mEq/L	7.93	mg/dL	98.67	mEq/L	104.67	mg/dL	NULL	NULL	15.67	mEq/L	NULL	NULL	NULL	NULL
14071752	67	F	WHITE	55.9	NULL	Medicare	English	SINGLE	TSICU	8.55	K/uL	3.14	m/uL	10.6	K/uL	0.28	K/uL	144.75	K/uL	9.58	g/dL	16.9	%	30.73	%	NULL	NULL	NULL	NULL	NULL	NULL	138.25	mEq/L	4	mEq/L	7.25	mg/dL	107.75	mEq/L	114.75	mg/dL	NULL	NULL	15	mEq/L	7.24	units	41.17	mm Hg
14081759	75	M	WHITE	110.7	173	Medicare	English	DIVORCED	MICU/SICU	13.05	K/uL	5.07	m/uL	NULL	NULL	NULL	NULL	225	K/uL	13.65	g/dL	15.2	%	42.75	%	3.6	g/dL	NULL	NULL	NULL	NULL	138.33	mEq/L	3.73	mEq/L	9	mg/dL	98	mEq/L	129	mg/dL	NULL	NULL	12.67	mEq/L	7.36	units	51	mm Hg
14083975	68	M	WHITE	89.8	NULL	Medicare	English	MARRIED	MICU/SICU	10.93	K/uL	2.75	m/uL	11.84	K/uL	0.19	K/uL	99.33	K/uL	8.17	g/dL	14.83	%	25.77	%	2.7	g/dL	NULL	NULL	NULL	NULL	140	mEq/L	4.15	mEq/L	8.4	mg/dL	106	mEq/L	149.5	mg/dL	NULL	NULL	10.5	mEq/L	7.36	units	44.67	mm Hg
14085442	67	F	UNKNOWN	96.4	NULL	Private	English	NULL	TSICU	21.63	K/uL	2.36	m/uL	NULL	NULL	NULL	NULL	308.67	K/uL	6.97	g/dL	22.13	%	23.57	%	NULL	NULL	NULL	NULL	NULL	NULL	143.5	mEq/L	4.15	mEq/L	8.1	mg/dL	111	mEq/L	94	mg/dL	NULL	NULL	11	mEq/L	7.23	units	50	mm Hg
14096379	74	M	WHITE	118	188	Medicare	English	MARRIED	SICU	29.72	K/uL	5.01	m/uL	26.75	K/uL	0.29	K/uL	83	K/uL	14.74	g/dL	15.58	%	46.36	%	NULL	NULL	NULL	NULL	NULL	NULL	135	mEq/L	5.36	mEq/L	7.28	mg/dL	98.8	mEq/L	103.4	mg/dL	NULL	NULL	26	mEq/L	7.24	units	41	mm Hg
14098914	84	M	BLACK/AFRICAN AMERICAN	130	NULL	Medicare	English	SINGLE	MICU/SICU	8.9	K/uL	3.64	m/uL	NULL	NULL	NULL	NULL	176	K/uL	8.5	g/dL	16	%	28.5	%	NULL	NULL	NULL	NULL	NULL	NULL	141	mEq/L	4.3	mEq/L	9.2	mg/dL	111	mEq/L	167	mg/dL	NULL	NULL	18	mEq/L	NULL	NULL	NULL	NULL
14099582	74	M	WHITE	63.15	178	Medicare	English	DIVORCED	CVICU	22.8	K/uL	3.23	m/uL	22.04	K/uL	1.86	K/uL	181.5	K/uL	10.05	g/dL	13.6	%	30.24	%	NULL	NULL	NULL	NULL	NULL	NULL	133.5	mEq/L	4.57	mEq/L	8.6	mg/dL	100.67	mEq/L	93	mg/dL	NULL	NULL	13.33	mEq/L	7.33	units	46.9	mm Hg
14105461	59	M	UNKNOWN	94.5	183	Private	English	MARRIED	TSICU	14.5	K/uL	3.95	m/uL	NULL	NULL	NULL	NULL	214	K/uL	12.5	g/dL	14.45	%	40.4	%	NULL	NULL	NULL	NULL	NULL	NULL	148.5	mEq/L	4.1	mEq/L	7.45	mg/dL	115	mEq/L	109	mg/dL	NULL	NULL	9.5	mEq/L	7.32	units	49	mm Hg
14106352	61	F	WHITE	46.9	NULL	Medicare	English	SINGLE	CVICU	18.25	K/uL	4.27	m/uL	13.47	K/uL	0.74	K/uL	557	K/uL	12.85	g/dL	14.2	%	38.65	%	3.1	g/dL	NULL	NULL	NULL	NULL	139	mEq/L	4.65	mEq/L	9.1	mg/dL	103	mEq/L	120	mg/dL	5.3	%	11.5	mEq/L	NULL	NULL	NULL	NULL
14123898	73	M	WHITE	79	168	Medicare	English	MARRIED	CVICU	11.3	K/uL	3.5	m/uL	7.72	K/uL	0.9	K/uL	150	K/uL	10.83	g/dL	13.2	%	32.53	%	NULL	NULL	NULL	NULL	NULL	NULL	133	mEq/L	4.4	mEq/L	NULL	NULL	104	mEq/L	133	mg/dL	NULL	NULL	7.5	mEq/L	7.37	units	43.56	mm Hg
14125217	88	F	WHITE	56	152	Medicare	English	WIDOWED	Neuro Intermediate	6	K/uL	3.46	m/uL	NULL	NULL	NULL	NULL	213	K/uL	10.8	g/dL	14.1	%	35	%	NULL	NULL	NULL	NULL	NULL	NULL	142	mEq/L	4.3	mEq/L	9.9	mg/dL	107	mEq/L	73	mg/dL	5.4	%	16	mEq/L	NULL	NULL	NULL	NULL
14133792	54	M	WHITE	71.3	173	Medicaid	English	SINGLE	MICU	10.85	K/uL	3.85	m/uL	9.47	K/uL	1.41	K/uL	321	K/uL	10.2	g/dL	15.8	%	32.4	%	3.35	g/dL	NULL	NULL	NULL	NULL	138	mEq/L	4.55	mEq/L	8.55	mg/dL	104.5	mEq/L	131	mg/dL	NULL	NULL	16.5	mEq/L	NULL	NULL	NULL	NULL
14136035	82	F	WHITE	52.65	152	Medicare	English	WIDOWED	CVICU	11.35	K/uL	4.34	m/uL	NULL	NULL	NULL	NULL	147.5	K/uL	13.05	g/dL	14.55	%	40.1	%	NULL	NULL	NULL	NULL	NULL	NULL	138	mEq/L	3.9	mEq/L	8.03	mg/dL	104	mEq/L	143	mg/dL	NULL	NULL	20.33	mEq/L	7.39	units	32.5	mm Hg
14136254	59	M	WHITE	97	NULL	Medicaid	English	SINGLE	MICU	7.2	K/uL	2.21	m/uL	5.71	K/uL	0.64	K/uL	70.5	K/uL	7.9	g/dL	17.75	%	25.25	%	NULL	NULL	NULL	NULL	NULL	NULL	137.5	mEq/L	4.15	mEq/L	6.8	mg/dL	100	mEq/L	65	mg/dL	NULL	NULL	17	mEq/L	7.42	units	37	mm Hg
14140975	91	F	WHITE	55.6	NULL	Medicare	English	WIDOWED	CCU	14.2	K/uL	4.12	m/uL	NULL	NULL	NULL	NULL	229	K/uL	11.3	g/dL	16.9	%	35.9	%	NULL	NULL	NULL	NULL	NULL	NULL	135	mEq/L	3.8	mEq/L	8.3	mg/dL	96	mEq/L	102	mg/dL	NULL	NULL	11.5	mEq/L	7.47	units	38	mm Hg
14141229	73	M	WHITE	75.55	NULL	Medicare	English	MARRIED	Neuro SICU	7.76	K/uL	2.94	m/uL	NULL	NULL	NULL	NULL	151.2	K/uL	8.6	g/dL	17.82	%	27.7	%	NULL	NULL	NULL	NULL	NULL	NULL	138.5	mEq/L	4.4	mEq/L	8.27	mg/dL	105.5	mEq/L	121.25	mg/dL	NULL	NULL	12.75	mEq/L	7.4	units	38	mm Hg
14143184	64	M	WHITE	100	175	Medicare	English	SINGLE	Neuro Intermediate	10.15	K/uL	4.96	m/uL	NULL	NULL	NULL	NULL	284.5	K/uL	16.05	g/dL	12.8	%	48	%	NULL	NULL	NULL	NULL	NULL	NULL	141.5	mEq/L	3.55	mEq/L	9.3	mg/dL	103	mEq/L	142.5	mg/dL	6.2	%	12.5	mEq/L	NULL	NULL	NULL	NULL
14147520	84	F	UNKNOWN	69.1	NULL	Medicare	English	DIVORCED	TSICU	12.3	K/uL	3.56	m/uL	NULL	NULL	NULL	NULL	113	K/uL	10.67	g/dL	14.77	%	31.67	%	NULL	NULL	NULL	NULL	NULL	NULL	139.5	mEq/L	4.3	mEq/L	8.95	mg/dL	108.5	mEq/L	135.5	mg/dL	NULL	NULL	13	mEq/L	7.32	units	45	mm Hg
14149424	92	M	WHITE	48.7	NULL	Medicare	English	DIVORCED	CCU	8.58	K/uL	4.01	m/uL	NULL	NULL	NULL	NULL	130.5	K/uL	12.48	g/dL	15	%	39.42	%	3.6	g/dL	NULL	NULL	NULL	NULL	137.33	mEq/L	5.37	mEq/L	9.04	mg/dL	99	mEq/L	179.83	mg/dL	NULL	NULL	23.33	mEq/L	7.38	units	38.43	mm Hg
14153022	70	F	WHITE	83.9	150	Private	English	MARRIED	CVICU	7.65	K/uL	3.33	m/uL	NULL	NULL	NULL	NULL	138	K/uL	9.5	g/dL	15.05	%	30.8	%	NULL	NULL	NULL	NULL	NULL	NULL	127	mEq/L	4.3	mEq/L	NULL	NULL	95.5	mEq/L	92	mg/dL	NULL	NULL	12	mEq/L	7.38	units	38.75	mm Hg
14155540	59	M	WHITE	83.3	NULL	Other	English	NULL	SICU	4.4	K/uL	3.69	m/uL	2.08	K/uL	0.71	K/uL	115.5	K/uL	11.15	g/dL	13.65	%	34.05	%	2.7	g/dL	NULL	NULL	NULL	NULL	134.5	mEq/L	4.4	mEq/L	7.75	mg/dL	98	mEq/L	84.5	mg/dL	NULL	NULL	14.5	mEq/L	7.25	units	54	mm Hg
14155634	80	M	WHITE	95	NULL	Medicare	English	MARRIED	Neuro Intermediate	5.85	K/uL	5.11	m/uL	NULL	NULL	NULL	NULL	197	K/uL	14.7	g/dL	15.9	%	42.9	%	NULL	NULL	NULL	NULL	NULL	NULL	139.5	mEq/L	4.1	mEq/L	8.95	mg/dL	108.5	mEq/L	86.5	mg/dL	5.4	%	8	mEq/L	NULL	NULL	NULL	NULL
14155967	92	F	WHITE	54.6	NULL	Medicare	English	WIDOWED	SICU	9.4	K/uL	3.26	m/uL	NULL	NULL	NULL	NULL	248	K/uL	8.5	g/dL	20.5	%	29.7	%	NULL	NULL	NULL	NULL	NULL	NULL	140.67	mEq/L	5.73	mEq/L	7.17	mg/dL	110.33	mEq/L	124.33	mg/dL	NULL	NULL	23	mEq/L	7.21	units	36	mm Hg
14161388	91	M	WHITE	78.5	164	Medicare	English	WIDOWED	MICU	9.9	K/uL	3.32	m/uL	NULL	NULL	NULL	NULL	132	K/uL	10.2	g/dL	13.8	%	33.7	%	3.7	g/dL	NULL	NULL	NULL	NULL	139	mEq/L	4.6	mEq/L	9.3	mg/dL	103	mEq/L	138	mg/dL	NULL	NULL	23	mEq/L	7.29	units	39	mm Hg
14163849	84	M	WHITE	77.4	NULL	Medicare	English	MARRIED	MICU	21.9	K/uL	4.06	m/uL	NULL	NULL	NULL	NULL	151	K/uL	11.5	g/dL	17.3	%	37.1	%	2.8	g/dL	4.7	g/dL	7.5	g/dL	135	mEq/L	5.45	mEq/L	9.45	mg/dL	97.5	mEq/L	106.5	mg/dL	NULL	NULL	21	mEq/L	7.29	units	51.33	mm Hg
14165118	59	M	WHITE	84.35	NULL	Medicaid	English	SINGLE	CVICU	8.6	K/uL	3.9	m/uL	NULL	NULL	NULL	NULL	144	K/uL	11.9	g/dL	13.6	%	37	%	NULL	NULL	NULL	NULL	NULL	NULL	139	mEq/L	3.75	mEq/L	NULL	NULL	103	mEq/L	106	mg/dL	NULL	NULL	15	mEq/L	7.32	units	56.83	mm Hg
14167870	76	M	WHITE	85.6	163	Medicare	English	MARRIED	CVICU	8.3	K/uL	3.71	m/uL	3.2	K/uL	1.52	K/uL	121	K/uL	10.9	g/dL	13.33	%	33.43	%	NULL	NULL	NULL	NULL	NULL	NULL	133	mEq/L	4.3	mEq/L	NULL	NULL	105	mEq/L	112	mg/dL	NULL	NULL	7	mEq/L	7.41	units	40.5	mm Hg
14170029	78	M	WHITE	66	175	Medicare	English	WIDOWED	MICU	11.4	K/uL	4.18	m/uL	8.37	K/uL	0.56	K/uL	259	K/uL	12.45	g/dL	14.3	%	38.95	%	3.5	g/dL	NULL	NULL	NULL	NULL	139	mEq/L	3.55	mEq/L	9.1	mg/dL	101.5	mEq/L	181	mg/dL	NULL	NULL	17.5	mEq/L	7.26	units	63	mm Hg
14174417	59	F	WHITE	119.9	NULL	Private	English	SINGLE	Neuro Intermediate	5.2	K/uL	3.17	m/uL	NULL	NULL	NULL	NULL	194	K/uL	9.9	g/dL	12.4	%	30.4	%	NULL	NULL	NULL	NULL	NULL	NULL	142	mEq/L	4.3	mEq/L	8.4	mg/dL	109	mEq/L	110	mg/dL	NULL	NULL	7	mEq/L	NULL	NULL	NULL	NULL
14174492	78	M	WHITE	100.4	NULL	Medicare	English	SINGLE	Neuro Intermediate	2.8	K/uL	3.86	m/uL	NULL	NULL	NULL	NULL	101	K/uL	11.8	g/dL	12.9	%	36.3	%	NULL	NULL	NULL	NULL	NULL	NULL	139	mEq/L	4.4	mEq/L	8.5	mg/dL	106	mEq/L	138	mg/dL	NULL	NULL	9	mEq/L	NULL	NULL	NULL	NULL
14187115	73	M	WHITE	99.5	NULL	Private	English	MARRIED	CVICU	13.25	K/uL	4.33	m/uL	11.87	K/uL	0.68	K/uL	180	K/uL	12.45	g/dL	19.35	%	39.2	%	3.5	g/dL	NULL	NULL	NULL	NULL	133.33	mEq/L	5.93	mEq/L	8.7	mg/dL	99	mEq/L	101.67	mg/dL	NULL	NULL	20.33	mEq/L	NULL	NULL	NULL	NULL
14194073	75	F	WHITE	113	NULL	Medicare	English	MARRIED	TSICU	10.4	K/uL	3.42	m/uL	NULL	NULL	NULL	NULL	216	K/uL	10.4	g/dL	14.7	%	32	%	NULL	NULL	NULL	NULL	NULL	NULL	137	mEq/L	4.3	mEq/L	8.3	mg/dL	100	mEq/L	136	mg/dL	NULL	NULL	12	mEq/L	NULL	NULL	NULL	NULL
14195593	45	M	WHITE	86.3	168	Private	English	SINGLE	MICU	13.45	K/uL	3.99	m/uL	NULL	NULL	NULL	NULL	114.5	K/uL	13.8	g/dL	15.5	%	43.35	%	NULL	NULL	NULL	NULL	NULL	NULL	136.4	mEq/L	3.26	mEq/L	6.32	mg/dL	100.2	mEq/L	141	mg/dL	4.8	%	15.4	mEq/L	7.26	units	48.8	mm Hg
14198340	69	F	WHITE	69.05	NULL	Medicare	English	DIVORCED	MICU	11.2	K/uL	4.04	m/uL	6.05	K/uL	4.27	K/uL	346.5	K/uL	12.55	g/dL	15.9	%	37.85	%	3.6	g/dL	NULL	NULL	NULL	NULL	141	mEq/L	4.2	mEq/L	9.6	mg/dL	109	mEq/L	137	mg/dL	NULL	NULL	12.5	mEq/L	7.42	units	34	mm Hg
14208778	68	F	BLACK/AFRICAN AMERICAN	162.2	NULL	Medicare	English	MARRIED	CCU	NULL	NULL	NULL	NULL	NULL	NULL	NULL	NULL	NULL	NULL	NULL	NULL	NULL	NULL	NULL	NULL	NULL	NULL	NULL	NULL	NULL	NULL	141.5	mEq/L	3.83	mEq/L	8.35	mg/dL	94	mEq/L	151.25	mg/dL	NULL	NULL	10.25	mEq/L	7.38	units	78	mm Hg
14211662	68	F	WHITE	69.8	NULL	Medicare	English	WIDOWED	SICU	16.1	K/uL	2.93	m/uL	NULL	NULL	NULL	NULL	350.67	K/uL	7.67	g/dL	14.87	%	26.1	%	NULL	NULL	NULL	NULL	NULL	NULL	138.5	mEq/L	4.55	mEq/L	8.25	mg/dL	102	mEq/L	134.5	mg/dL	NULL	NULL	12	mEq/L	7.44	units	42	mm Hg
14212440	83	M	WHITE	69.3	NULL	Medicare	English	DIVORCED	CVICU	5.65	K/uL	2.43	m/uL	NULL	NULL	NULL	NULL	110.5	K/uL	7.05	g/dL	14.9	%	22.95	%	NULL	NULL	NULL	NULL	NULL	NULL	137.5	mEq/L	4.3	mEq/L	8.4	mg/dL	105	mEq/L	120	mg/dL	NULL	NULL	7	mEq/L	7.36	units	47	mm Hg
14215236	57	F	BLACK/AFRICAN AMERICAN	136.9	NULL	Medicare	English	SINGLE	MICU	8.6	K/uL	4.06	m/uL	NULL	NULL	NULL	NULL	231	K/uL	11.7	g/dL	16.2	%	35.5	%	NULL	NULL	NULL	NULL	NULL	NULL	144	mEq/L	4.2	mEq/L	8.8	mg/dL	95	mEq/L	85	mg/dL	NULL	NULL	14	mEq/L	7.4	units	69	mm Hg
14217106	77	F	WHITE	50.2	NULL	Medicare	English	WIDOWED	Neuro Intermediate	12.35	K/uL	4.85	m/uL	13.6	K/uL	0.23	K/uL	236	K/uL	14.65	g/dL	13.05	%	42.85	%	3.6	g/dL	NULL	NULL	NULL	NULL	142.5	mEq/L	3.65	mEq/L	8.55	mg/dL	104	mEq/L	76.5	mg/dL	5	%	21	mEq/L	7.39	units	34	mm Hg
14220073	67	M	WHITE	85.9	NULL	Medicare	English	MARRIED	MICU	7.3	K/uL	3.68	m/uL	NULL	NULL	NULL	NULL	293	K/uL	10.9	g/dL	13.4	%	33.6	%	NULL	NULL	NULL	NULL	NULL	NULL	138	mEq/L	4.2	mEq/L	8	mg/dL	107	mEq/L	87	mg/dL	NULL	NULL	16	mEq/L	NULL	NULL	NULL	NULL
14223356	71	F	WHITE	61.3	165	Private	English	WIDOWED	CVICU	10.03	K/uL	2.71	m/uL	6.06	K/uL	1.93	K/uL	84.75	K/uL	9.13	g/dL	13.53	%	26.7	%	NULL	NULL	NULL	NULL	NULL	NULL	139	mEq/L	NULL	NULL	NULL	NULL	103	mEq/L	NULL	NULL	NULL	NULL	11	mEq/L	7.46	units	35.14	mm Hg
14229404	73	M	WHITE	53.8	168	Other	English	SINGLE	CCU	6	K/uL	3.98	m/uL	NULL	NULL	NULL	NULL	127	K/uL	12.8	g/dL	13.6	%	39.9	%	NULL	NULL	NULL	NULL	NULL	NULL	139	mEq/L	4.15	mEq/L	8.45	mg/dL	106.5	mEq/L	82.5	mg/dL	NULL	NULL	10	mEq/L	NULL	NULL	NULL	NULL
14234424	66	F	WHITE	70.1667	163	Private	English	MARRIED	MICU/SICU	17.6	K/uL	2.98	m/uL	NULL	NULL	NULL	NULL	461.5	K/uL	8.2	g/dL	16.95	%	24.95	%	NULL	NULL	NULL	NULL	NULL	NULL	126.57	mEq/L	4.67	mEq/L	9.48	mg/dL	95.86	mEq/L	111.43	mg/dL	NULL	NULL	17	mEq/L	7.25	units	35	mm Hg
14235322	59	M	BLACK/AFRICAN	87.2	183	Medicare	English	SINGLE	MICU/SICU	4.57	K/uL	4.9	m/uL	2.47	K/uL	1.02	K/uL	210	K/uL	12.57	g/dL	15.9	%	41.77	%	NULL	NULL	NULL	NULL	NULL	NULL	145	mEq/L	3.8	mEq/L	9.1	mg/dL	108.67	mEq/L	88.33	mg/dL	NULL	NULL	12.33	mEq/L	7.35	units	47	mm Hg
14239129	61	F	OTHER	60	157	Private	English	SINGLE	MICU	1.7	K/uL	3.12	m/uL	1.19	K/uL	0.3	K/uL	93.67	K/uL	9.67	g/dL	14.97	%	29.37	%	2.5	g/dL	NULL	NULL	NULL	NULL	137.33	mEq/L	3.93	mEq/L	7.65	mg/dL	99.67	mEq/L	104.67	mg/dL	NULL	NULL	15.33	mEq/L	7.33	units	52	mm Hg
14244279	82	M	OTHER	51.8	NULL	Medicaid	English	DIVORCED	MICU	11.6	K/uL	2.72	m/uL	10.53	K/uL	1.21	K/uL	138.6	K/uL	8.6	g/dL	16.2	%	26	%	2.9	g/dL	NULL	NULL	NULL	NULL	140.5	mEq/L	4.6	mEq/L	8.55	mg/dL	105.5	mEq/L	216	mg/dL	NULL	NULL	18.5	mEq/L	7.34	units	33	mm Hg
14245477	65	F	UNKNOWN	68.2	NULL	Private	English	NULL	SICU	19.3	K/uL	2.83	m/uL	NULL	NULL	NULL	NULL	372	K/uL	7.6	g/dL	14.8	%	24.6	%	2.9	g/dL	NULL	NULL	NULL	NULL	139	mEq/L	4.1	mEq/L	8.3	mg/dL	104	mEq/L	138	mg/dL	NULL	NULL	7	mEq/L	7.4	units	46	mm Hg
14247472	76	M	WHITE	79.3	NULL	Medicare	English	DIVORCED	SICU	5.9	K/uL	2.63	m/uL	4.47	K/uL	0.61	K/uL	163	K/uL	8	g/dL	18.75	%	24.37	%	NULL	NULL	NULL	NULL	NULL	NULL	139	mEq/L	5	mEq/L	8.7	mg/dL	107	mEq/L	94	mg/dL	NULL	NULL	12	mEq/L	NULL	NULL	NULL	NULL
14255354	77	F	WHITE	57	165	Medicare	English	MARRIED	MICU/SICU	12.4	K/uL	3.31	m/uL	11.07	K/uL	0.81	K/uL	208	K/uL	9.9	g/dL	14	%	30	%	NULL	NULL	NULL	NULL	NULL	NULL	141	mEq/L	3.7	mEq/L	7.17	mg/dL	107.67	mEq/L	93	mg/dL	NULL	NULL	20.33	mEq/L	7.36	units	26	mm Hg
14260018	60	M	WHITE	61.4	NULL	Medicaid	English	SINGLE	SICU	7.95	K/uL	4.31	m/uL	NULL	NULL	NULL	NULL	167	K/uL	9.5	g/dL	16.85	%	32.5	%	NULL	NULL	NULL	NULL	NULL	NULL	134.5	mEq/L	4.55	mEq/L	7.85	mg/dL	97	mEq/L	69.5	mg/dL	NULL	NULL	25	mEq/L	NULL	NULL	NULL	NULL
14260773	90	F	WHITE	46.7	NULL	Medicare	English	WIDOWED	CVICU	14.1	K/uL	2.52	m/uL	11.7	K/uL	0.64	K/uL	123	K/uL	7.7	g/dL	14.3	%	23.63	%	NULL	NULL	NULL	NULL	NULL	NULL	131.75	mEq/L	4	mEq/L	7.18	mg/dL	101.25	mEq/L	142.25	mg/dL	NULL	NULL	12.75	mEq/L	7.28	units	28.5	mm Hg
14260897	67	F	WHITE	48.1	NULL	Medicare	English	DIVORCED	MICU/SICU	5.1	K/uL	3.47	m/uL	NULL	NULL	NULL	NULL	211	K/uL	10.8	g/dL	12.8	%	29.8	%	NULL	NULL	NULL	NULL	NULL	NULL	117	mEq/L	4.03	mEq/L	7.45	mg/dL	82.5	mEq/L	115.17	mg/dL	NULL	NULL	13.83	mEq/L	7.44	units	43.5	mm Hg
14263276	68	M	UNKNOWN	58.4	157	Medicare	English	NULL	TSICU	26.4	K/uL	2.78	m/uL	33.75	K/uL	0.17	K/uL	276	K/uL	8.85	g/dL	20.45	%	29.55	%	NULL	NULL	NULL	NULL	NULL	NULL	144	mEq/L	4.27	mEq/L	8	mg/dL	109.33	mEq/L	161.33	mg/dL	NULL	NULL	9.67	mEq/L	7.32	units	54.57	mm Hg
14264013	82	M	WHITE	76	173	Medicare	English	MARRIED	CVICU	24.15	K/uL	3.61	m/uL	20.88	K/uL	0.97	K/uL	403.5	K/uL	10.65	g/dL	15.05	%	32.2	%	2.4	g/dL	NULL	NULL	NULL	NULL	134	mEq/L	4.95	mEq/L	8.6	mg/dL	98.5	mEq/L	235.5	mg/dL	NULL	NULL	23.75	mEq/L	7.23	units	45.1	mm Hg
14265720	67	F	WHITE	63.8	NULL	Medicare	English	SINGLE	TSICU	7	K/uL	3.62	m/uL	NULL	NULL	NULL	NULL	144	K/uL	10.2	g/dL	16.4	%	31.3	%	NULL	NULL	NULL	NULL	NULL	NULL	130	mEq/L	4.2	mEq/L	8.3	mg/dL	92	mEq/L	105	mg/dL	NULL	NULL	17	mEq/L	NULL	NULL	NULL	NULL
14267683	86	F	UNKNOWN	57.2	NULL	Medicare	English	WIDOWED	CCU	6.6	K/uL	2.8	m/uL	NULL	NULL	NULL	NULL	229	K/uL	8.4	g/dL	14.9	%	26.9	%	NULL	NULL	NULL	NULL	NULL	NULL	138	mEq/L	4.5	mEq/L	8.2	mg/dL	103	mEq/L	82	mg/dL	NULL	NULL	13	mEq/L	NULL	NULL	NULL	NULL
14274285	71	M	WHITE	48.4	NULL	Medicare	English	MARRIED	MICU/SICU	6	K/uL	3.91	m/uL	4.72	K/uL	0.47	K/uL	212.5	K/uL	11.3	g/dL	15.9	%	37.35	%	3	g/dL	NULL	NULL	NULL	NULL	146.5	mEq/L	4.1	mEq/L	7.4	mg/dL	112	mEq/L	136.5	mg/dL	NULL	NULL	10.5	mEq/L	7.31	units	48	mm Hg
14277155	96	F	WHITE	63.3	NULL	Medicare	English	DIVORCED	MICU	27.9	K/uL	3.51	m/uL	NULL	NULL	NULL	NULL	254	K/uL	11.5	g/dL	14	%	36.6	%	4.5	g/dL	NULL	NULL	NULL	NULL	141	mEq/L	3.9	mEq/L	9.7	mg/dL	102	mEq/L	244	mg/dL	NULL	NULL	21	mEq/L	7.4	units	34	mm Hg
14277590	74	F	WHITE	69.4	165	Medicare	English	MARRIED	SICU	5.9	K/uL	3.53	m/uL	NULL	NULL	NULL	NULL	168.5	K/uL	10.5	g/dL	13.15	%	32.05	%	NULL	NULL	NULL	NULL	NULL	NULL	140.5	mEq/L	3.85	mEq/L	8.65	mg/dL	109.5	mEq/L	136	mg/dL	NULL	NULL	13	mEq/L	NULL	NULL	NULL	NULL
14280430	82	F	WHITE	66.1	NULL	Medicare	English	WIDOWED	MICU	13.2	K/uL	4.43	m/uL	11.5	K/uL	1.23	K/uL	293	K/uL	11.1	g/dL	17.2	%	36	%	NULL	NULL	NULL	NULL	NULL	NULL	142	mEq/L	3.6	mEq/L	8.8	mg/dL	102	mEq/L	NULL	NULL	NULL	NULL	23	mEq/L	7.46	units	34	mm Hg
14280728	91	M	WHITE	79.5	175	Medicare	English	MARRIED	MICU	15.3	K/uL	2.69	m/uL	11.64	K/uL	1.38	K/uL	227	K/uL	9.7	g/dL	16.5	%	29.5	%	NULL	NULL	NULL	NULL	NULL	NULL	144.33	mEq/L	4.03	mEq/L	9.17	mg/dL	101.67	mEq/L	101.33	mg/dL	NULL	NULL	15.67	mEq/L	7.35	units	54.33	mm Hg
14282911	77	F	WHITE	50.5	162.56	Medicare	English	MARRIED	MICU/SICU	11.8	K/uL	3.3	m/uL	NULL	NULL	NULL	NULL	286	K/uL	9.5	g/dL	15	%	29.3	%	NULL	NULL	NULL	NULL	NULL	NULL	135	mEq/L	3.9	mEq/L	8	mg/dL	106	mEq/L	151	mg/dL	NULL	NULL	12	mEq/L	7.32	units	46	mm Hg
14288515	61	M	WHITE	73.6	188	Medicaid	English	NULL	CCU	12.1	K/uL	4.75	m/uL	10.01	K/uL	1.18	K/uL	109	K/uL	16.1	g/dL	15.9	%	47.6	%	NULL	NULL	NULL	NULL	NULL	NULL	134	mEq/L	3.6	mEq/L	8.27	mg/dL	98.33	mEq/L	136	mg/dL	NULL	NULL	15.67	mEq/L	7.44	units	30.75	mm Hg
14290075	65	M	WHITE	114.2	178	Medicare	English	DIVORCED	MICU/SICU	10.5	K/uL	3.25	m/uL	NULL	NULL	NULL	NULL	163	K/uL	9.5	g/dL	12.4	%	29.2	%	3.4	g/dL	NULL	NULL	NULL	NULL	135.5	mEq/L	4.65	mEq/L	8.6	mg/dL	92.5	mEq/L	339.5	mg/dL	NULL	NULL	18	mEq/L	7.35	units	70	mm Hg
14290919	57	F	WHITE	75.3	165	Private	English	MARRIED	CVICU	10.3	K/uL	3.24	m/uL	NULL	NULL	NULL	NULL	320	K/uL	9.9	g/dL	12.4	%	30.5	%	NULL	NULL	NULL	NULL	NULL	NULL	139	mEq/L	3.85	mEq/L	8.6	mg/dL	104.5	mEq/L	144.5	mg/dL	NULL	NULL	15.5	mEq/L	7.36	units	NULL	NULL
14293920	92	M	WHITE	71.0667	NULL	Medicare	English	WIDOWED	CCU	6.53	K/uL	3.2	m/uL	NULL	NULL	NULL	NULL	240	K/uL	8.47	g/dL	18.33	%	26.93	%	2.8	g/dL	NULL	NULL	NULL	NULL	136	mEq/L	3.5	mEq/L	8.3	mg/dL	102.67	mEq/L	101.67	mg/dL	5.2	%	16	mEq/L	7.34	units	26	mm Hg
14295224	72	M	BLACK/AFRICAN AMERICAN	52.1	173	Medicare	English	WIDOWED	MICU/SICU	12.3	K/uL	3.4	m/uL	8.3	K/uL	0.55	K/uL	197.5	K/uL	9.65	g/dL	13.8	%	30.7	%	NULL	NULL	NULL	NULL	NULL	NULL	134	mEq/L	3.95	mEq/L	8.8	mg/dL	101	mEq/L	116	mg/dL	NULL	NULL	12.5	mEq/L	7.34	units	46.25	mm Hg
14296756	84	F	WHITE	54.4	NULL	Medicare	English	MARRIED	MICU	7.7	K/uL	3.08	m/uL	NULL	NULL	NULL	NULL	57	K/uL	9.5	g/dL	17.7	%	29.8	%	NULL	NULL	NULL	NULL	NULL	NULL	146	mEq/L	3.5	mEq/L	8.4	mg/dL	105	mEq/L	129	mg/dL	NULL	NULL	19	mEq/L	7.3	units	47	mm Hg
14301996	82	F	WHITE	50.35	160	Medicare	English	SINGLE	MICU	7.85	K/uL	3.95	m/uL	NULL	NULL	NULL	NULL	189.5	K/uL	12.75	g/dL	13.6	%	38.6	%	NULL	NULL	NULL	NULL	NULL	NULL	140.33	mEq/L	4.27	mEq/L	8.1	mg/dL	98	mEq/L	109.67	mg/dL	NULL	NULL	14.67	mEq/L	7.43	units	47.33	mm Hg
14304304	75	M	WHITE	57.8	NULL	Medicare	English	MARRIED	MICU/SICU	15.6	K/uL	4.08	m/uL	14.74	K/uL	0.87	K/uL	233	K/uL	10.85	g/dL	14.8	%	36.25	%	NULL	NULL	NULL	NULL	NULL	NULL	146.5	mEq/L	3.9	mEq/L	8.45	mg/dL	109	mEq/L	181.5	mg/dL	NULL	NULL	18	mEq/L	7.42	units	45	mm Hg
14305007	56	M	WHITE	73.6	168	Private	English	SINGLE	TSICU	11.15	K/uL	3.51	m/uL	NULL	NULL	NULL	NULL	158.5	K/uL	11.45	g/dL	13	%	34.2	%	NULL	NULL	NULL	NULL	NULL	NULL	134.5	mEq/L	4.65	mEq/L	8.3	mg/dL	100	mEq/L	149	mg/dL	NULL	NULL	16	mEq/L	7.3	units	48	mm Hg
14320942	62	F	WHITE	92.2	NULL	Medicaid	English	WIDOWED	MICU	8.4	K/uL	4.73	m/uL	NULL	NULL	NULL	NULL	209	K/uL	13.9	g/dL	14.8	%	44.5	%	NULL	NULL	NULL	NULL	NULL	NULL	137	mEq/L	4.8	mEq/L	8.5	mg/dL	102	mEq/L	147	mg/dL	NULL	NULL	18	mEq/L	7.3	units	52.5	mm Hg
14326966	91	F	UNKNOWN	55.4	NULL	Medicare	English	NULL	MICU/SICU	10.6	K/uL	2.98	m/uL	NULL	NULL	NULL	NULL	151	K/uL	9.5	g/dL	16	%	30.3	%	2.7	g/dL	NULL	NULL	NULL	NULL	142	mEq/L	4.6	mEq/L	8.6	mg/dL	109	mEq/L	108	mg/dL	NULL	NULL	13	mEq/L	NULL	NULL	NULL	NULL
14329220	76	M	WHITE	78	168	Medicare	English	SINGLE	MICU/SICU	15.9	K/uL	2.52	m/uL	NULL	NULL	NULL	NULL	272.6	K/uL	7.66	g/dL	15.14	%	24.28	%	NULL	NULL	NULL	NULL	NULL	NULL	143.67	mEq/L	3.23	mEq/L	7.53	mg/dL	108.33	mEq/L	116.67	mg/dL	NULL	NULL	11	mEq/L	7.42	units	36.5	mm Hg
14331353	70	M	UNKNOWN	110	NULL	Medicare	English	MARRIED	MICU/SICU	3.55	K/uL	2.99	m/uL	NULL	NULL	NULL	NULL	108.5	K/uL	9.7	g/dL	16.7	%	28.7	%	2.85	g/dL	NULL	NULL	NULL	NULL	141.5	mEq/L	3.3	mEq/L	7.4	mg/dL	116	mEq/L	137	mg/dL	NULL	NULL	10	mEq/L	7.39	units	31	mm Hg
14338819	94	F	WHITE	52.2	163	Medicare	English	WIDOWED	TSICU	9.5	K/uL	3.21	m/uL	NULL	NULL	NULL	NULL	231	K/uL	8.7	g/dL	14.8	%	29.5	%	NULL	NULL	NULL	NULL	NULL	NULL	142	mEq/L	4.2	mEq/L	9.2	mg/dL	102	mEq/L	113	mg/dL	NULL	NULL	12	mEq/L	7.41	units	NULL	NULL
14346010	82	M	WHITE	70	175	Medicare	English	MARRIED	MICU	11.15	K/uL	3.74	m/uL	NULL	NULL	NULL	NULL	155	K/uL	10.7	g/dL	16	%	35.95	%	NULL	NULL	NULL	NULL	NULL	NULL	144.5	mEq/L	4.75	mEq/L	9.1	mg/dL	97	mEq/L	177.5	mg/dL	NULL	NULL	11	mEq/L	7.35	units	78.43	mm Hg
14347713	86	M	WHITE	66.45	155	Medicare	English	DIVORCED	CVICU	19.47	K/uL	2.76	m/uL	12.09	K/uL	0.79	K/uL	60.5	K/uL	7.93	g/dL	15.9	%	24.65	%	NULL	NULL	NULL	NULL	NULL	NULL	137	mEq/L	4.55	mEq/L	7.6	mg/dL	108	mEq/L	142.5	mg/dL	NULL	NULL	8.33	mEq/L	7.36	units	40.38	mm Hg
14350516	74	F	BLACK/AFRICAN AMERICAN	75	NULL	Medicare	English	SINGLE	MICU	8.8	K/uL	3.8	m/uL	NULL	NULL	NULL	NULL	331	K/uL	8.6	g/dL	18.2	%	29.3	%	NULL	NULL	NULL	NULL	NULL	NULL	144	mEq/L	4.2	mEq/L	9	mg/dL	106	mEq/L	82	mg/dL	NULL	NULL	12	mEq/L	NULL	NULL	NULL	NULL
14353923	68	F	WHITE	86.8	163	Medicare	English	MARRIED	CVICU	28.07	K/uL	3.99	m/uL	28.69	K/uL	3	K/uL	231.67	K/uL	12.8	g/dL	14.77	%	38.78	%	NULL	NULL	NULL	NULL	NULL	NULL	138	mEq/L	4.4	mEq/L	7.8	mg/dL	107	mEq/L	117	mg/dL	NULL	NULL	10	mEq/L	7.36	units	43.76	mm Hg
14354527	56	F	HISPANIC/LATINO - PUERTO RICAN	73.05	145	Medicare	English	SINGLE	CVICU	11	K/uL	2.94	m/uL	5.43	K/uL	2.78	K/uL	126.33	K/uL	8.97	g/dL	13	%	29.58	%	NULL	NULL	NULL	NULL	NULL	NULL	136	mEq/L	5.4	mEq/L	8.5	mg/dL	107.5	mEq/L	117	mg/dL	NULL	NULL	8	mEq/L	7.35	units	47.8	mm Hg
14363615	72	M	WHITE	58.2	NULL	Medicare	English	DIVORCED	MICU/SICU	14.2	K/uL	3.25	m/uL	13.07	K/uL	0.42	K/uL	188.75	K/uL	9.78	g/dL	15.55	%	29.93	%	NULL	NULL	NULL	NULL	NULL	NULL	138	mEq/L	3.33	mEq/L	8.43	mg/dL	103.75	mEq/L	96.5	mg/dL	NULL	NULL	11.75	mEq/L	7.41	units	44	mm Hg
14363616	68	M	WHITE	70.3	NULL	Medicare	English	SINGLE	SICU	16.6	K/uL	3.14	m/uL	NULL	NULL	NULL	NULL	71	K/uL	10.5	g/dL	15.9	%	31.5	%	NULL	NULL	NULL	NULL	NULL	NULL	142	mEq/L	4.2	mEq/L	8.1	mg/dL	105	mEq/L	91	mg/dL	NULL	NULL	14	mEq/L	7.43	units	33.67	mm Hg
14363893	74	M	WHITE	102.2	180	Medicare	English	MARRIED	CVICU	15.75	K/uL	3.66	m/uL	NULL	NULL	NULL	NULL	113	K/uL	11.55	g/dL	13.2	%	35.67	%	NULL	NULL	NULL	NULL	NULL	NULL	141	mEq/L	4.43	mEq/L	7.8	mg/dL	109.5	mEq/L	120	mg/dL	NULL	NULL	9.5	mEq/L	7.37	units	45.33	mm Hg
14364444	67	M	WHITE - OTHER EUROPEAN	61	NULL	Medicare	English	DIVORCED	MICU	26	K/uL	2.81	m/uL	NULL	NULL	NULL	NULL	53	K/uL	8.3	g/dL	24.8	%	24.4	%	2	g/dL	NULL	NULL	NULL	NULL	138	mEq/L	4.55	mEq/L	7.45	mg/dL	104	mEq/L	120.5	mg/dL	NULL	NULL	16.5	mEq/L	7.34	units	33	mm Hg
14365209	76	F	WHITE - OTHER EUROPEAN	58.1	155	Medicare	English	SINGLE	MICU	5.45	K/uL	3.25	m/uL	NULL	NULL	NULL	NULL	65	K/uL	8.85	g/dL	18.3	%	29	%	NULL	NULL	NULL	NULL	NULL	NULL	142	mEq/L	3.5	mEq/L	9.4	mg/dL	102	mEq/L	95	mg/dL	NULL	NULL	16	mEq/L	NULL	NULL	NULL	NULL
14369559	75	F	WHITE	97.5	NULL	Medicare	English	MARRIED	CVICU	8.6	K/uL	3.98	m/uL	6.67	K/uL	1.28	K/uL	461	K/uL	11.85	g/dL	13.5	%	37	%	3.8	g/dL	NULL	NULL	NULL	NULL	139	mEq/L	4.9	mEq/L	9.5	mg/dL	101.5	mEq/L	100	mg/dL	NULL	NULL	13	mEq/L	NULL	NULL	NULL	NULL
14370505	72	M	WHITE	86.1	NULL	Medicare	English	MARRIED	Neuro SICU	11.5	K/uL	4.42	m/uL	NULL	NULL	NULL	NULL	249	K/uL	12.6	g/dL	12.6	%	39.3	%	3.8	g/dL	NULL	NULL	NULL	NULL	145	mEq/L	3.9	mEq/L	9	mg/dL	106	mEq/L	114	mg/dL	NULL	NULL	14	mEq/L	NULL	NULL	NULL	NULL
14374577	74	M	WHITE	85.7	170	Medicare	English	MARRIED	CVICU	8.76	K/uL	3.35	m/uL	1.81	K/uL	1.46	K/uL	82.6	K/uL	10.34	g/dL	13.04	%	32.73	%	NULL	NULL	NULL	NULL	NULL	NULL	137.5	mEq/L	4.48	mEq/L	7.8	mg/dL	105.25	mEq/L	119.5	mg/dL	NULL	NULL	13	mEq/L	7.38	units	42.71	mm Hg
14376085	70	M	WHITE - RUSSIAN	71	163	Medicare	Russian	SINGLE	MICU	20.3	K/uL	2.95	m/uL	14.84	K/uL	2.83	K/uL	182	K/uL	9.9	g/dL	16.7	%	31.3	%	2.4	g/dL	NULL	NULL	NULL	NULL	134.33	mEq/L	5.23	mEq/L	8.93	mg/dL	94.33	mEq/L	199	mg/dL	NULL	NULL	19	mEq/L	7.37	units	41.2	mm Hg
14377821	62	M	UNABLE TO OBTAIN	104.55	155	Private	English	NULL	CVICU	13.8	K/uL	3.78	m/uL	8.11	K/uL	2.13	K/uL	127.67	K/uL	11.37	g/dL	13.63	%	32.83	%	NULL	NULL	NULL	NULL	NULL	NULL	135	mEq/L	3.7	mEq/L	7.9	mg/dL	105.5	mEq/L	123	mg/dL	NULL	NULL	9.5	mEq/L	7.36	units	41.43	mm Hg
14381310	63	M	UNABLE TO OBTAIN	79.8	170	Medicaid	English	NULL	MICU	8.23	K/uL	2.97	m/uL	6.26	K/uL	0.45	K/uL	198.67	K/uL	9.93	g/dL	15.5	%	30.07	%	3.03	g/dL	NULL	NULL	NULL	NULL	142.33	mEq/L	4	mEq/L	7.6	mg/dL	109.67	mEq/L	181.67	mg/dL	NULL	NULL	18	mEq/L	7.27	units	36	mm Hg
14381700	92	F	WHITE	62.9667	NULL	Medicare	English	WIDOWED	MICU/SICU	NULL	NULL	NULL	NULL	NULL	NULL	NULL	NULL	NULL	NULL	NULL	NULL	NULL	NULL	NULL	NULL	NULL	NULL	NULL	NULL	NULL	NULL	NULL	NULL	NULL	NULL	NULL	NULL	NULL	NULL	NULL	NULL	NULL	NULL	NULL	NULL	NULL	NULL	NULL	NULL
14384786	92	F	UNKNOWN	55.1	163	Medicare	English	MARRIED	MICU	14.75	K/uL	3.53	m/uL	15.92	K/uL	0.38	K/uL	185.5	K/uL	11.15	g/dL	14.25	%	34.15	%	3.6	g/dL	NULL	NULL	NULL	NULL	146	mEq/L	3.7	mEq/L	8.65	mg/dL	115	mEq/L	105.5	mg/dL	NULL	NULL	10.5	mEq/L	7.45	units	32.33	mm Hg
14395528	84	M	WHITE	78.2333	NULL	Medicare	English	WIDOWED	CCU	10.3	K/uL	4.89	m/uL	9.64	K/uL	0.36	K/uL	105.5	K/uL	14.75	g/dL	16.25	%	45.2	%	NULL	NULL	NULL	NULL	NULL	NULL	129.5	mEq/L	4	mEq/L	8.65	mg/dL	89.5	mEq/L	116	mg/dL	NULL	NULL	22.5	mEq/L	NULL	NULL	NULL	NULL
14399758	79	M	UNKNOWN	71	NULL	Medicare	English	SINGLE	MICU/SICU	19.77	K/uL	3.55	m/uL	15.11	K/uL	0.66	K/uL	250	K/uL	10.63	g/dL	14.87	%	31.27	%	2	g/dL	NULL	NULL	NULL	NULL	137	mEq/L	5.2	mEq/L	6.55	mg/dL	97	mEq/L	173.5	mg/dL	NULL	NULL	29.5	mEq/L	7.26	units	56.5	mm Hg
14404312	74	M	WHITE	82.9	NULL	Medicare	English	SINGLE	CVICU	7.3	K/uL	4.62	m/uL	NULL	NULL	NULL	NULL	206	K/uL	13.7	g/dL	15.1	%	40.9	%	NULL	NULL	NULL	NULL	NULL	NULL	133	mEq/L	4.3	mEq/L	9.3	mg/dL	97	mEq/L	100	mg/dL	NULL	NULL	14	mEq/L	NULL	NULL	NULL	NULL
14407617	73	F	WHITE	65.45	NULL	Medicare	English	DIVORCED	CCU	7.6	K/uL	4.53	m/uL	NULL	NULL	NULL	NULL	172	K/uL	12.05	g/dL	14.8	%	37.85	%	NULL	NULL	NULL	NULL	NULL	NULL	136	mEq/L	3.55	mEq/L	9	mg/dL	100.5	mEq/L	88	mg/dL	NULL	NULL	11	mEq/L	NULL	NULL	NULL	NULL
14408944	87	F	WHITE	63.1	157	Medicare	English	MARRIED	MICU	12.35	K/uL	3.41	m/uL	NULL	NULL	NULL	NULL	255.5	K/uL	9.25	g/dL	15.9	%	29.8	%	NULL	NULL	NULL	NULL	NULL	NULL	140	mEq/L	4.4	mEq/L	8.85	mg/dL	99	mEq/L	110.5	mg/dL	NULL	NULL	13	mEq/L	7.4	units	44	mm Hg
14413721	51	F	WHITE	81.6	NULL	Private	English	SINGLE	SICU	12.33	K/uL	3.22	m/uL	NULL	NULL	NULL	NULL	209	K/uL	9.47	g/dL	12.83	%	31.6	%	NULL	NULL	NULL	NULL	NULL	NULL	136	mEq/L	4.1	mEq/L	7.95	mg/dL	99	mEq/L	134.5	mg/dL	NULL	NULL	15.5	mEq/L	7.33	units	55.25	mm Hg
14413822	86	F	WHITE	62	157	Medicare	English	WIDOWED	MICU	12.3	K/uL	3.77	m/uL	NULL	NULL	NULL	NULL	207	K/uL	11.15	g/dL	13.35	%	35.5	%	3	g/dL	NULL	NULL	NULL	NULL	141	mEq/L	4.25	mEq/L	9.2	mg/dL	107	mEq/L	102.5	mg/dL	NULL	NULL	11.5	mEq/L	7.39	units	41.4	mm Hg
14415460	81	F	WHITE	45.5	165	Medicare	English	WIDOWED	TSICU	22.4	K/uL	3.62	m/uL	NULL	NULL	NULL	NULL	195.5	K/uL	11.45	g/dL	13.85	%	34.75	%	NULL	NULL	NULL	NULL	NULL	NULL	134	mEq/L	4.4	mEq/L	8.8	mg/dL	95	mEq/L	136.5	mg/dL	NULL	NULL	13.5	mEq/L	7.25	units	64.33	mm Hg
14415578	70	M	BLACK/AFRICAN AMERICAN	55.5	NULL	Medicare	Portuguese	MARRIED	MICU/SICU	0.75	K/uL	2.68	m/uL	0.3	K/uL	0.37	K/uL	30.5	K/uL	8.25	g/dL	16.65	%	23.9	%	2.8	g/dL	NULL	NULL	NULL	NULL	135	mEq/L	3.47	mEq/L	7.97	mg/dL	100.33	mEq/L	82.67	mg/dL	NULL	NULL	16.67	mEq/L	NULL	NULL	NULL	NULL
14416150	59	M	WHITE	90	170	Medicaid	English	SINGLE	Neuro SICU	9.87	K/uL	4.8	m/uL	NULL	NULL	NULL	NULL	318.67	K/uL	11.83	g/dL	18.23	%	37.4	%	NULL	NULL	NULL	NULL	NULL	NULL	130	mEq/L	4.84	mEq/L	7.7	mg/dL	100.4	mEq/L	163.8	mg/dL	5.4	%	11.6	mEq/L	7.24	units	47.63	mm Hg
14418220	68	M	WHITE	111.9	NULL	Medicare	English	MARRIED	CVICU	19.56	K/uL	2.63	m/uL	21.19	K/uL	2.01	K/uL	153.63	K/uL	8.38	g/dL	13.85	%	24.84	%	2.9	g/dL	NULL	NULL	NULL	NULL	145.25	mEq/L	3.65	mEq/L	8.33	mg/dL	107	mEq/L	267	mg/dL	NULL	NULL	18.67	mEq/L	7.28	units	44.21	mm Hg
14419804	64	M	UNABLE TO OBTAIN	124.1	171	Medicare	English	MARRIED	CCU	19.31	K/uL	4.59	m/uL	17.4	K/uL	0.8	K/uL	295.75	K/uL	12.31	g/dL	21.79	%	39.85	%	3.65	g/dL	NULL	NULL	NULL	NULL	135.25	mEq/L	4.75	mEq/L	8.35	mg/dL	94.13	mEq/L	230.75	mg/dL	NULL	NULL	23.38	mEq/L	7.36	units	36.3	mm Hg
14419958	57	M	WHITE	81.8	178	Medicare	English	MARRIED	SICU	14	K/uL	3.99	m/uL	NULL	NULL	NULL	NULL	243	K/uL	11.7	g/dL	13.45	%	34.65	%	NULL	NULL	NULL	NULL	NULL	NULL	135.5	mEq/L	4.05	mEq/L	8.85	mg/dL	101	mEq/L	129.5	mg/dL	NULL	NULL	16	mEq/L	NULL	NULL	NULL	NULL
14424745	82	F	WHITE	53.5	NULL	Medicare	English	WIDOWED	SICU	13.55	K/uL	2.65	m/uL	11.35	K/uL	0.37	K/uL	263	K/uL	7.7	g/dL	15.95	%	25.3	%	NULL	NULL	NULL	NULL	NULL	NULL	141	mEq/L	4.3	mEq/L	7.6	mg/dL	107	mEq/L	76	mg/dL	NULL	NULL	22	mEq/L	NULL	NULL	NULL	NULL
14431361	74	M	UNKNOWN	92.25	180	Medicare	English	MARRIED	CVICU	11.5	K/uL	3.4	m/uL	6.61	K/uL	1.41	K/uL	165	K/uL	11.13	g/dL	12.83	%	33.93	%	NULL	NULL	NULL	NULL	NULL	NULL	140	mEq/L	4.25	mEq/L	8.1	mg/dL	109	mEq/L	118	mg/dL	NULL	NULL	11	mEq/L	7.33	units	44.71	mm Hg
14433684	81	F	WHITE	77.8	NULL	Medicare	English	MARRIED	MICU/SICU	10.75	K/uL	3.14	m/uL	10.12	K/uL	0.81	K/uL	300	K/uL	8.45	g/dL	16.5	%	28.7	%	2.5	g/dL	NULL	NULL	NULL	NULL	138	mEq/L	4.1	mEq/L	8.6	mg/dL	99	mEq/L	140	mg/dL	NULL	NULL	14.5	mEq/L	7.42	units	44	mm Hg
14445205	85	M	WHITE	70.5	175	Medicare	English	MARRIED	CCU	8.7	K/uL	4.23	m/uL	NULL	NULL	NULL	NULL	226	K/uL	13.15	g/dL	12.8	%	38.8	%	NULL	NULL	NULL	NULL	NULL	NULL	137	mEq/L	3.9	mEq/L	8.4	mg/dL	99	mEq/L	88	mg/dL	NULL	NULL	18	mEq/L	NULL	NULL	NULL	NULL
14458343	76	M	WHITE	85	NULL	Medicare	English	SINGLE	MICU	14.45	K/uL	3.07	m/uL	NULL	NULL	NULL	NULL	262	K/uL	8.9	g/dL	14.7	%	27.95	%	NULL	NULL	NULL	NULL	NULL	NULL	135.33	mEq/L	4.47	mEq/L	8.8	mg/dL	100.67	mEq/L	148.5	mg/dL	NULL	NULL	14.67	mEq/L	7.3	units	46.17	mm Hg
14461781	74	F	WHITE	73.5	155	Medicare	English	DIVORCED	MICU	2.58	K/uL	2.65	m/uL	0.85	K/uL	0.81	K/uL	225.5	K/uL	8.1	g/dL	15.73	%	25.85	%	1.3	g/dL	NULL	NULL	NULL	NULL	134	mEq/L	4.58	mEq/L	8.3	mg/dL	98.75	mEq/L	70.5	mg/dL	NULL	NULL	24.5	mEq/L	7.14	units	36.08	mm Hg
14462177	64	M	UNKNOWN	69.5	NULL	Medicare	English	NULL	TSICU	13	K/uL	3.22	m/uL	NULL	NULL	NULL	NULL	180	K/uL	9.77	g/dL	16.27	%	29.33	%	NULL	NULL	NULL	NULL	NULL	NULL	135	mEq/L	4.35	mEq/L	8	mg/dL	103	mEq/L	98.5	mg/dL	NULL	NULL	13	mEq/L	NULL	NULL	NULL	NULL
14470517	77	M	BLACK/AFRICAN AMERICAN	64.4	NULL	Medicare	English	MARRIED	SICU	6.75	K/uL	2.66	m/uL	NULL	NULL	NULL	NULL	157	K/uL	7.65	g/dL	15.3	%	24.65	%	NULL	NULL	NULL	NULL	NULL	NULL	139.5	mEq/L	4.65	mEq/L	8.2	mg/dL	106	mEq/L	122.5	mg/dL	NULL	NULL	9	mEq/L	7.37	units	41.4	mm Hg
14477239	67	M	WHITE	58.65	NULL	Medicare	English	DIVORCED	CVICU	7.6	K/uL	2.89	m/uL	NULL	NULL	NULL	NULL	96	K/uL	10	g/dL	13.2	%	30.5	%	2.5	g/dL	NULL	NULL	NULL	NULL	133	mEq/L	4.1	mEq/L	8.1	mg/dL	102	mEq/L	121	mg/dL	NULL	NULL	12	mEq/L	NULL	NULL	NULL	NULL
14480975	42	M	UNKNOWN	96	178	Private	English	NULL	Neuro SICU	11.85	K/uL	3.79	m/uL	NULL	NULL	NULL	NULL	199.5	K/uL	12.05	g/dL	13.55	%	36.15	%	NULL	NULL	NULL	NULL	NULL	NULL	144.33	mEq/L	4.43	mEq/L	7.47	mg/dL	112.33	mEq/L	111.67	mg/dL	5.3	%	11.67	mEq/L	7.34	units	35	mm Hg
14481936	87	M	WHITE	77.1	157	Medicare	Italian	MARRIED	MICU	31.6	K/uL	4.51	m/uL	NULL	NULL	NULL	NULL	268.25	K/uL	12.4	g/dL	14.83	%	41.6	%	NULL	NULL	NULL	NULL	NULL	NULL	136.17	mEq/L	5.77	mEq/L	9.83	mg/dL	96.5	mEq/L	177.67	mg/dL	NULL	NULL	20.67	mEq/L	7.28	units	65.75	mm Hg
14483818	59	M	WHITE	147.7	185	Medicare	English	MARRIED	MICU	13.8	K/uL	3.72	m/uL	NULL	NULL	NULL	NULL	259	K/uL	9.85	g/dL	17.35	%	32.65	%	2.8	g/dL	NULL	NULL	NULL	NULL	138.5	mEq/L	4.5	mEq/L	8.5	mg/dL	92	mEq/L	107.5	mg/dL	NULL	NULL	8	mEq/L	7.38	units	77.83	mm Hg
14487864	78	F	WHITE	54.5333	NULL	Medicare	English	MARRIED	TSICU	10.7	K/uL	3.83	m/uL	NULL	NULL	NULL	NULL	187.5	K/uL	11.85	g/dL	13.35	%	36.15	%	NULL	NULL	NULL	NULL	NULL	NULL	134.5	mEq/L	4.15	mEq/L	7.8	mg/dL	104.5	mEq/L	104.5	mg/dL	NULL	NULL	6.5	mEq/L	7.32	units	47.8	mm Hg
14493328	84	F	WHITE	64.4	NULL	Medicare	English	MARRIED	Neuro SICU	7.7	K/uL	2.97	m/uL	NULL	NULL	NULL	NULL	178	K/uL	10.2	g/dL	11.9	%	30.6	%	NULL	NULL	NULL	NULL	NULL	NULL	132.67	mEq/L	4.1	mEq/L	8.9	mg/dL	101	mEq/L	91.5	mg/dL	5	%	9.5	mEq/L	NULL	NULL	NULL	NULL
14495065	68	M	WHITE	86.2	168	Medicare	English	NULL	CCU	3.8	K/uL	3.89	m/uL	NULL	NULL	NULL	NULL	122	K/uL	12.2	g/dL	14.2	%	37.2	%	NULL	NULL	NULL	NULL	NULL	NULL	137.5	mEq/L	3.9	mEq/L	8.65	mg/dL	93.5	mEq/L	151	mg/dL	NULL	NULL	17	mEq/L	7.47	units	46	mm Hg
14497007	75	F	WHITE	75	NULL	Medicare	English	MARRIED	MICU/SICU	6.4	K/uL	2.46	m/uL	5.19	K/uL	0.48	K/uL	208	K/uL	7.1	g/dL	16.3	%	22.4	%	2.4	g/dL	NULL	NULL	NULL	NULL	134.5	mEq/L	3.8	mEq/L	7.25	mg/dL	104.5	mEq/L	92	mg/dL	NULL	NULL	12.5	mEq/L	NULL	NULL	NULL	NULL
14502434	72	M	ASIAN - CHINESE	86.2	NULL	Medicare	Chinese	MARRIED	Neuro Intermediate	6.5	K/uL	5.65	m/uL	NULL	NULL	NULL	NULL	279	K/uL	12.1	g/dL	15.9	%	40.4	%	NULL	NULL	NULL	NULL	NULL	NULL	145	mEq/L	3.7	mEq/L	8.8	mg/dL	108	mEq/L	134	mg/dL	5.7	%	16	mEq/L	NULL	NULL	NULL	NULL
14505634	75	F	UNKNOWN	62.3	152	Medicare	English	NULL	MICU	8.55	K/uL	2.68	m/uL	5	K/uL	1.94	K/uL	378	K/uL	8.15	g/dL	14.45	%	26.55	%	NULL	NULL	NULL	NULL	NULL	NULL	143.5	mEq/L	3.55	mEq/L	8.8	mg/dL	107	mEq/L	93	mg/dL	NULL	NULL	13.5	mEq/L	7.43	units	40.67	mm Hg
14507277	84	F	WHITE	61.2	160	Medicare	English	SINGLE	CVICU	8.3	K/uL	3.94	m/uL	NULL	NULL	NULL	NULL	197	K/uL	11.1	g/dL	12.4	%	35.7	%	NULL	NULL	NULL	NULL	NULL	NULL	139	mEq/L	4.7	mEq/L	8.7	mg/dL	105	mEq/L	113	mg/dL	NULL	NULL	10	mEq/L	NULL	NULL	NULL	NULL
14515506	33	M	OTHER	104.5	NULL	Private	Arabic	MARRIED	Neuro Stepdown	10.6	K/uL	4.94	m/uL	NULL	NULL	NULL	NULL	175	K/uL	14.1	g/dL	12.8	%	41.4	%	NULL	NULL	NULL	NULL	NULL	NULL	135	mEq/L	4.1	mEq/L	8	mg/dL	97	mEq/L	136	mg/dL	NULL	NULL	19	mEq/L	NULL	NULL	NULL	NULL
14518524	78	F	UNKNOWN	74.4667	170	Medicare	English	NULL	TSICU	13.8	K/uL	3.11	m/uL	NULL	NULL	NULL	NULL	319.5	K/uL	9.2	g/dL	16.1	%	28.5	%	2.5	g/dL	NULL	NULL	NULL	NULL	141.5	mEq/L	3.95	mEq/L	7.75	mg/dL	101.5	mEq/L	86.5	mg/dL	NULL	NULL	13.5	mEq/L	7.39	units	45	mm Hg
14525126	64	F	WHITE	100	157	Private	English	MARRIED	SICU	14.25	K/uL	3.21	m/uL	9.25	K/uL	0.71	K/uL	217.5	K/uL	10.9	g/dL	15.35	%	33.25	%	NULL	NULL	NULL	NULL	NULL	NULL	138.5	mEq/L	5.05	mEq/L	7.75	mg/dL	101	mEq/L	151	mg/dL	NULL	NULL	17.5	mEq/L	7.42	units	37.14	mm Hg
14527508	77	M	WHITE	79.1	175	Medicare	English	SINGLE	Neuro Intermediate	3.85	K/uL	3.4	m/uL	NULL	NULL	NULL	NULL	240	K/uL	9.65	g/dL	16.85	%	32.4	%	NULL	NULL	NULL	NULL	NULL	NULL	142.5	mEq/L	3.45	mEq/L	8	mg/dL	104.5	mEq/L	118	mg/dL	NULL	NULL	12	mEq/L	7.39	units	45	mm Hg
14529457	87	M	WHITE	72.8	NULL	Medicare	English	MARRIED	CCU	8.15	K/uL	3.6	m/uL	NULL	NULL	NULL	NULL	201.5	K/uL	11.35	g/dL	12.75	%	34.5	%	NULL	NULL	NULL	NULL	NULL	NULL	135.67	mEq/L	4.3	mEq/L	9.8	mg/dL	101.33	mEq/L	102.67	mg/dL	NULL	NULL	12.33	mEq/L	7.44	units	39	mm Hg
14530732	44	F	WHITE	47	122	Private	English	SINGLE	CVICU	14.3	K/uL	4.4	m/uL	NULL	NULL	NULL	NULL	298	K/uL	13.6	g/dL	13.6	%	40.4	%	NULL	NULL	NULL	NULL	NULL	NULL	141	mEq/L	4.2	mEq/L	9.7	mg/dL	104	mEq/L	130	mg/dL	NULL	NULL	11	mEq/L	NULL	NULL	NULL	NULL
14535966	65	F	UNKNOWN	70	155	Medicare	English	NULL	MICU	14	K/uL	2.12	m/uL	11.11	K/uL	0.49	K/uL	178.75	K/uL	7.18	g/dL	15.35	%	20.08	%	2.6	g/dL	NULL	NULL	NULL	NULL	139	mEq/L	3.34	mEq/L	6.99	mg/dL	100.71	mEq/L	290	mg/dL	NULL	NULL	26.29	mEq/L	7.33	units	25	mm Hg
14537042	57	F	UNKNOWN	53.1	NULL	Medicaid	English	NULL	MICU/SICU	5.8	K/uL	2.13	m/uL	NULL	NULL	NULL	NULL	93	K/uL	6.57	g/dL	19.55	%	20.83	%	NULL	NULL	NULL	NULL	NULL	NULL	140	mEq/L	4.2	mEq/L	7.7	mg/dL	102.5	mEq/L	91	mg/dL	NULL	NULL	11.5	mEq/L	NULL	NULL	NULL	NULL
14539412	58	M	WHITE	97.9	173	Medicaid	English	SINGLE	SICU	11.76	K/uL	3.34	m/uL	8.22	K/uL	0.57	K/uL	110	K/uL	10.46	g/dL	15.3	%	32.13	%	NULL	NULL	NULL	NULL	NULL	NULL	141	mEq/L	6	mEq/L	8.3	mg/dL	106.71	mEq/L	111.14	mg/dL	NULL	NULL	19.43	mEq/L	7.28	units	44.94	mm Hg
14540700	73	F	WHITE	83	NULL	Medicare	English	SINGLE	TSICU	26.72	K/uL	3.74	m/uL	NULL	NULL	NULL	NULL	240.4	K/uL	10.12	g/dL	18.76	%	31.2	%	NULL	NULL	NULL	NULL	NULL	NULL	135.67	mEq/L	5.47	mEq/L	8.53	mg/dL	99	mEq/L	165.67	mg/dL	NULL	NULL	15.67	mEq/L	NULL	NULL	NULL	NULL
14541526	75	M	WHITE	79.45	173	Medicare	English	MARRIED	CCU	6.8	K/uL	4.28	m/uL	NULL	NULL	NULL	NULL	96.5	K/uL	13.2	g/dL	14.1	%	39.6	%	NULL	NULL	NULL	NULL	NULL	NULL	138.5	mEq/L	4.05	mEq/L	8.55	mg/dL	103.5	mEq/L	117.5	mg/dL	NULL	NULL	15	mEq/L	7.37	units	45	mm Hg
14551878	92	F	WHITE	67	NULL	Medicare	English	WIDOWED	MICU/SICU	26.6	K/uL	3.92	m/uL	NULL	NULL	NULL	NULL	100	K/uL	12.5	g/dL	14.4	%	37.5	%	NULL	NULL	NULL	NULL	NULL	NULL	135.5	mEq/L	3.6	mEq/L	8.65	mg/dL	96.5	mEq/L	72.5	mg/dL	NULL	NULL	14.5	mEq/L	NULL	NULL	NULL	NULL
14552024	52	M	UNABLE TO OBTAIN	127.1	NULL	Private	English	NULL	MICU	9.4	K/uL	4.46	m/uL	NULL	NULL	NULL	NULL	123	K/uL	14	g/dL	13.1	%	39.7	%	NULL	NULL	NULL	NULL	NULL	NULL	128	mEq/L	4.05	mEq/L	8.15	mg/dL	94	mEq/L	161.5	mg/dL	6.2	%	11.5	mEq/L	NULL	NULL	NULL	NULL
14556995	71	F	UNKNOWN	92.2	NULL	Medicare	English	WIDOWED	SICU	14.7	K/uL	3.41	m/uL	NULL	NULL	NULL	NULL	339	K/uL	11.4	g/dL	15.9	%	33.4	%	NULL	NULL	NULL	NULL	NULL	NULL	137.5	mEq/L	3.15	mEq/L	9.1	mg/dL	87	mEq/L	171.5	mg/dL	NULL	NULL	16.5	mEq/L	7.5	units	56	mm Hg
14560913	66	F	WHITE	79.8	157	Medicaid	English	SINGLE	MICU/SICU	6.9	K/uL	2.65	m/uL	1.26	K/uL	0.49	K/uL	162.75	K/uL	8.18	g/dL	17.43	%	25.15	%	2.6	g/dL	NULL	NULL	NULL	NULL	141	mEq/L	4.23	mEq/L	7.83	mg/dL	108.33	mEq/L	175.33	mg/dL	NULL	NULL	12	mEq/L	7.41	units	34.25	mm Hg
14564149	77	M	WHITE	52.6	173	Medicare	English	WIDOWED	MICU	15.6	K/uL	3.2	m/uL	12.87	K/uL	2.48	K/uL	305	K/uL	9.05	g/dL	15.9	%	30.2	%	2.5	g/dL	NULL	NULL	NULL	NULL	145	mEq/L	5.65	mEq/L	11.3	mg/dL	107	mEq/L	184.5	mg/dL	NULL	NULL	13	mEq/L	7.31	units	54	mm Hg
14564568	62	M	UNKNOWN	61.7	175	Medicaid	English	NULL	MICU	13.73	K/uL	2.68	m/uL	12.04	K/uL	2.23	K/uL	148	K/uL	8.6	g/dL	20.37	%	25.13	%	4.2	g/dL	NULL	NULL	NULL	NULL	135	mEq/L	5.05	mEq/L	9.25	mg/dL	96.5	mEq/L	78	mg/dL	NULL	NULL	19	mEq/L	7.51	units	29.57	mm Hg
14565294	50	M	BLACK/AFRICAN AMERICAN	130.8	NULL	Medicaid	English	SINGLE	MICU/SICU	10.5	K/uL	5.81	m/uL	NULL	NULL	NULL	NULL	263	K/uL	14.5	g/dL	15.4	%	48.1	%	NULL	NULL	NULL	NULL	NULL	NULL	144	mEq/L	3.6	mEq/L	NULL	NULL	106	mEq/L	112	mg/dL	NULL	NULL	14	mEq/L	7.36	units	54	mm Hg
14573033	77	F	WHITE	85.7	160	Medicare	English	MARRIED	CCU	18.7	K/uL	3.48	m/uL	NULL	NULL	NULL	NULL	140	K/uL	10.3	g/dL	14.2	%	33.7	%	3.6	g/dL	NULL	NULL	NULL	NULL	141.8	mEq/L	4.6	mEq/L	8.36	mg/dL	104.6	mEq/L	176.4	mg/dL	NULL	NULL	17.2	mEq/L	7.35	units	44.5	mm Hg
14573633	61	F	BLACK/AFRICAN AMERICAN	75	NULL	Medicaid	English	SINGLE	CCU	8.5	K/uL	4.7	m/uL	5.3	K/uL	1.78	K/uL	143.33	K/uL	11.23	g/dL	15.53	%	36.07	%	3.2	g/dL	NULL	NULL	NULL	NULL	140.25	mEq/L	3.95	mEq/L	8.93	mg/dL	109	mEq/L	118	mg/dL	6.1	%	13	mEq/L	7.36	units	42	mm Hg
14573966	63	M	WHITE	71.45	168	Medicare	English	DIVORCED	CVICU	8.6	K/uL	2.44	m/uL	NULL	NULL	NULL	NULL	94.5	K/uL	7.55	g/dL	19.25	%	22.8	%	2.5	g/dL	NULL	NULL	NULL	NULL	127.33	mEq/L	4.17	mEq/L	7.9	mg/dL	95	mEq/L	110.33	mg/dL	NULL	NULL	9.67	mEq/L	7.4	units	37	mm Hg
14575918	68	M	BLACK/CAPE VERDEAN	98.3	NULL	Medicare	Portuguese	MARRIED	SICU	11.9	K/uL	5.15	m/uL	NULL	NULL	NULL	NULL	241	K/uL	16.6	g/dL	13.7	%	50.4	%	NULL	NULL	NULL	NULL	NULL	NULL	136	mEq/L	3.8	mEq/L	8.4	mg/dL	98	mEq/L	114	mg/dL	NULL	NULL	17	mEq/L	NULL	NULL	NULL	NULL
14577242	77	F	WHITE	64.3	NULL	Medicare	English	WIDOWED	MICU	2.15	K/uL	2.52	m/uL	NULL	NULL	NULL	NULL	174.5	K/uL	9.15	g/dL	24.25	%	27.6	%	NULL	NULL	NULL	NULL	NULL	NULL	138	mEq/L	3.7	mEq/L	7.8	mg/dL	106	mEq/L	101	mg/dL	NULL	NULL	7	mEq/L	NULL	NULL	NULL	NULL
14580643	71	F	BLACK/AFRICAN AMERICAN	77.6	155	Medicare	English	DIVORCED	Neuro Intermediate	9.3	K/uL	3.02	m/uL	NULL	NULL	NULL	NULL	100.5	K/uL	8.4	g/dL	16.78	%	28.45	%	NULL	NULL	NULL	NULL	NULL	NULL	136	mEq/L	4.9	mEq/L	8.6	mg/dL	103.25	mEq/L	98	mg/dL	NULL	NULL	11.5	mEq/L	NULL	NULL	NULL	NULL
14584470	66	F	BLACK/AFRICAN AMERICAN	63.6	NULL	Medicare	English	SINGLE	Neuro SICU	10.65	K/uL	2.79	m/uL	NULL	NULL	NULL	NULL	164	K/uL	7.05	g/dL	21.9	%	24.35	%	NULL	NULL	NULL	NULL	NULL	NULL	144	mEq/L	4.35	mEq/L	10.5	mg/dL	112.5	mEq/L	128	mg/dL	NULL	NULL	18	mEq/L	7.34	units	29.8	mm Hg
14584491	69	F	WHITE	45.9	163	Medicare	English	MARRIED	MICU	21.05	K/uL	2.94	m/uL	17.76	K/uL	1.26	K/uL	327	K/uL	8.45	g/dL	15.15	%	26.3	%	NULL	NULL	NULL	NULL	NULL	NULL	136	mEq/L	3.75	mEq/L	8.3	mg/dL	95	mEq/L	122	mg/dL	NULL	NULL	15.5	mEq/L	7.39	units	48	mm Hg
14592578	90	F	WHITE - RUSSIAN	42.5	NULL	Medicare	Russian	WIDOWED	SICU	10.27	K/uL	3.29	m/uL	6.94	K/uL	1.79	K/uL	234.33	K/uL	10.03	g/dL	14.53	%	30.33	%	NULL	NULL	NULL	NULL	NULL	NULL	133.33	mEq/L	4.17	mEq/L	8.3	mg/dL	97.33	mEq/L	131.33	mg/dL	NULL	NULL	12.67	mEq/L	7.46	units	32	mm Hg
14603968	79	F	WHITE	45.2	152	Medicare	English	WIDOWED	CCU	8.7	K/uL	5.21	m/uL	NULL	NULL	NULL	NULL	181	K/uL	14.6	g/dL	13.9	%	46.5	%	NULL	NULL	NULL	NULL	NULL	NULL	141	mEq/L	4.2	mEq/L	9.07	mg/dL	100.33	mEq/L	157	mg/dL	NULL	NULL	19	mEq/L	7.32	units	54.6	mm Hg
14607649	81	F	WHITE	72	NULL	Medicare	English	NULL	Neuro Intermediate	18	K/uL	4.56	m/uL	NULL	NULL	NULL	NULL	287	K/uL	13.9	g/dL	14.4	%	44.7	%	NULL	NULL	NULL	NULL	NULL	NULL	145	mEq/L	4.4	mEq/L	8.5	mg/dL	109	mEq/L	174	mg/dL	NULL	NULL	15	mEq/L	NULL	NULL	NULL	NULL
14611897	73	M	WHITE	84.7	NULL	Medicare	English	DIVORCED	MICU/SICU	11.95	K/uL	5.17	m/uL	NULL	NULL	NULL	NULL	150.5	K/uL	16.2	g/dL	13.3	%	49.3	%	4.1	g/dL	NULL	NULL	NULL	NULL	134	mEq/L	4.35	mEq/L	8.75	mg/dL	97.5	mEq/L	160	mg/dL	NULL	NULL	17.5	mEq/L	7.35	units	48	mm Hg
14613468	66	F	BLACK/AFRICAN AMERICAN	97.5	NULL	Medicare	English	DIVORCED	CVICU	6.2	K/uL	2.14	m/uL	NULL	NULL	NULL	NULL	123	K/uL	6.9	g/dL	24.05	%	20.75	%	NULL	NULL	NULL	NULL	NULL	NULL	135	mEq/L	2.85	mEq/L	8.4	mg/dL	94	mEq/L	102	mg/dL	NULL	NULL	20	mEq/L	7.4	units	36	mm Hg
14617593	67	M	WHITE	97.6	NULL	Private	English	MARRIED	MICU/SICU	8.6	K/uL	4.71	m/uL	NULL	NULL	NULL	NULL	163	K/uL	15	g/dL	12.8	%	48.7	%	NULL	NULL	NULL	NULL	NULL	NULL	137	mEq/L	5.05	mEq/L	9.3	mg/dL	98	mEq/L	135.5	mg/dL	NULL	NULL	11.5	mEq/L	7.37	units	57	mm Hg
14619200	80	F	WHITE	55.8	163	Medicare	English	WIDOWED	MICU	14	K/uL	2.76	m/uL	NULL	NULL	NULL	NULL	186.5	K/uL	8.1	g/dL	15.75	%	25.05	%	NULL	NULL	NULL	NULL	NULL	NULL	126.25	mEq/L	4.88	mEq/L	8.8	mg/dL	92.25	mEq/L	82.75	mg/dL	NULL	NULL	22.5	mEq/L	7.3	units	36.6	mm Hg
14623418	64	M	UNKNOWN	71.7	170	Medicaid	English	NULL	MICU	6.25	K/uL	2.67	m/uL	NULL	NULL	NULL	NULL	90.5	K/uL	9.4	g/dL	18.15	%	25.65	%	NULL	NULL	NULL	NULL	NULL	NULL	118.67	mEq/L	3.7	mEq/L	8.57	mg/dL	84.67	mEq/L	108	mg/dL	NULL	NULL	18.33	mEq/L	7.33	units	42	mm Hg
14624611	55	M	WHITE	62	NULL	Medicaid	English	SINGLE	MICU	27.94	K/uL	2.93	m/uL	24.15	K/uL	0.41	K/uL	153	K/uL	8.16	g/dL	19.5	%	26.8	%	2.4	g/dL	NULL	NULL	NULL	NULL	140	mEq/L	3.8	mEq/L	7	mg/dL	104	mEq/L	84	mg/dL	NULL	NULL	17	mEq/L	NULL	NULL	NULL	NULL
14624763	88	F	WHITE	42.2	NULL	Medicare	English	WIDOWED	TSICU	12.1	K/uL	3.04	m/uL	NULL	NULL	NULL	NULL	201	K/uL	10.4	g/dL	15.5	%	33.4	%	NULL	NULL	NULL	NULL	NULL	NULL	138	mEq/L	4.3	mEq/L	9	mg/dL	97	mEq/L	124	mg/dL	NULL	NULL	12	mEq/L	NULL	NULL	NULL	NULL
14628781	66	M	ASIAN - CHINESE	59	NULL	Medicaid	Chinese	MARRIED	MICU/SICU	3.15	K/uL	4.7	m/uL	3.83	K/uL	0.34	K/uL	98.5	K/uL	12.68	g/dL	17.68	%	40.33	%	2.7	g/dL	NULL	NULL	NULL	NULL	136.5	mEq/L	4.73	mEq/L	7.93	mg/dL	97.5	mEq/L	108	mg/dL	NULL	NULL	11.75	mEq/L	7.3	units	62.5	mm Hg
14630010	52	F	WHITE	70.3	163	Medicaid	English	DIVORCED	MICU/SICU	4.9	K/uL	3.43	m/uL	NULL	NULL	NULL	NULL	47	K/uL	9.9	g/dL	15	%	30.8	%	2.5	g/dL	NULL	NULL	NULL	NULL	140	mEq/L	3.9	mEq/L	8.6	mg/dL	106	mEq/L	108	mg/dL	NULL	NULL	11	mEq/L	7.36	units	NULL	NULL
14630440	47	M	WHITE	60.3	175	Medicaid	English	MARRIED	MICU	10.4	K/uL	3.52	m/uL	NULL	NULL	NULL	NULL	278	K/uL	11.35	g/dL	13.55	%	32.95	%	3.1	g/dL	NULL	NULL	NULL	NULL	146	mEq/L	3.85	mEq/L	9.55	mg/dL	115.5	mEq/L	92	mg/dL	NULL	NULL	10.5	mEq/L	7.34	units	39	mm Hg
14631997	58	M	WHITE	68.6	NULL	Medicaid	English	MARRIED	MICU/SICU	4.2	K/uL	2.68	m/uL	3.02	K/uL	0.73	K/uL	125.5	K/uL	10.35	g/dL	15	%	28.7	%	3.4	g/dL	NULL	NULL	NULL	NULL	142.5	mEq/L	3.3	mEq/L	8.75	mg/dL	92.5	mEq/L	117.5	mg/dL	NULL	NULL	19.5	mEq/L	7.4	units	57.5	mm Hg
14636657	68	F	WHITE	67.85	168	Medicare	English	WIDOWED	CVICU	19.53	K/uL	3.1	m/uL	11.63	K/uL	3.15	K/uL	169.33	K/uL	9.48	g/dL	14.33	%	29.95	%	NULL	NULL	NULL	NULL	NULL	NULL	135	mEq/L	4.35	mEq/L	8.7	mg/dL	104	mEq/L	96	mg/dL	NULL	NULL	9	mEq/L	7.39	units	41.73	mm Hg
14640747	58	M	WHITE	85.45	175	Medicaid	English	SINGLE	CVICU	14.88	K/uL	3.64	m/uL	8.09	K/uL	2.75	K/uL	115	K/uL	10.78	g/dL	12.65	%	31.74	%	NULL	NULL	NULL	NULL	NULL	NULL	137	mEq/L	4.73	mEq/L	7.75	mg/dL	106	mEq/L	119.5	mg/dL	NULL	NULL	9.33	mEq/L	7.37	units	42.22	mm Hg
14640931	63	F	WHITE	59.1	NULL	Medicaid	English	MARRIED	Neuro Stepdown	3.2	K/uL	3.67	m/uL	NULL	NULL	NULL	NULL	157	K/uL	13.4	g/dL	13.9	%	38.5	%	NULL	NULL	NULL	NULL	NULL	NULL	135	mEq/L	4	mEq/L	9.2	mg/dL	97	mEq/L	83	mg/dL	NULL	NULL	15	mEq/L	NULL	NULL	NULL	NULL
14643103	65	F	UNKNOWN	90	168	Medicare	English	MARRIED	MICU	15.6	K/uL	3.84	m/uL	14.28	K/uL	2.49	K/uL	243.5	K/uL	11.83	g/dL	13.6	%	39.3	%	3.5	g/dL	NULL	NULL	NULL	NULL	142	mEq/L	4.75	mEq/L	8.35	mg/dL	105.5	mEq/L	128.5	mg/dL	5.6	%	16	mEq/L	7.38	units	43.33	mm Hg
14645499	88	F	UNKNOWN	60.8667	NULL	Medicare	English	NULL	MICU/SICU	14.47	K/uL	2.66	m/uL	NULL	NULL	NULL	NULL	141.67	K/uL	7.97	g/dL	13.9	%	25.13	%	NULL	NULL	NULL	NULL	NULL	NULL	137	mEq/L	4.15	mEq/L	8.4	mg/dL	105	mEq/L	94	mg/dL	NULL	NULL	9	mEq/L	7.34	units	44	mm Hg
14650508	51	M	WHITE	82.7	178	Private	English	MARRIED	MICU/SICU	16.63	K/uL	2.85	m/uL	15.18	K/uL	2.19	K/uL	207.5	K/uL	8.24	g/dL	13.58	%	25.13	%	3.1	g/dL	NULL	NULL	NULL	NULL	139.67	mEq/L	3.83	mEq/L	8.8	mg/dL	110	mEq/L	143.33	mg/dL	5.1	%	9	mEq/L	NULL	NULL	NULL	NULL
14653675	82	F	UNKNOWN	43.2	NULL	Medicare	English	NULL	MICU	10.7	K/uL	2.6	m/uL	8.29	K/uL	0.75	K/uL	96.5	K/uL	7.65	g/dL	17	%	24.1	%	2.4	g/dL	NULL	NULL	NULL	NULL	144	mEq/L	3.65	mEq/L	7.9	mg/dL	106	mEq/L	85.5	mg/dL	NULL	NULL	9.5	mEq/L	7.34	units	53.5	mm Hg
14656487	61	F	WHITE	83.4	NULL	Medicaid	English	DIVORCED	SICU	4	K/uL	3.43	m/uL	NULL	NULL	NULL	NULL	196	K/uL	10.1	g/dL	14	%	31.7	%	NULL	NULL	NULL	NULL	NULL	NULL	141	mEq/L	4	mEq/L	7.9	mg/dL	110	mEq/L	79	mg/dL	NULL	NULL	9	mEq/L	7.26	units	53.83	mm Hg
14659758	50	F	BLACK/AFRICAN AMERICAN	NULL	NULL	Medicaid	English	SINGLE	MICU	8.7	K/uL	2.79	m/uL	NULL	NULL	NULL	NULL	88.33	K/uL	8.68	g/dL	21.33	%	24.88	%	2.8	g/dL	NULL	NULL	NULL	NULL	135.5	mEq/L	4.1	mEq/L	6.85	mg/dL	101	mEq/L	157	mg/dL	NULL	NULL	18.5	mEq/L	7.37	units	53	mm Hg
14660006	75	M	WHITE - OTHER EUROPEAN	71.8	NULL	Medicare	English	MARRIED	CCU	7.83	K/uL	2.92	m/uL	NULL	NULL	NULL	NULL	196.5	K/uL	8.15	g/dL	17.63	%	25.7	%	NULL	NULL	NULL	NULL	NULL	NULL	135.5	mEq/L	4.55	mEq/L	8.63	mg/dL	102.5	mEq/L	124.5	mg/dL	NULL	NULL	13.5	mEq/L	NULL	NULL	NULL	NULL
14662051	75	M	WHITE	65	165	Medicare	English	MARRIED	CVICU	16.97	K/uL	2.56	m/uL	11.56	K/uL	1.18	K/uL	115.25	K/uL	7.73	g/dL	14.83	%	24.56	%	NULL	NULL	NULL	NULL	NULL	NULL	137	mEq/L	5.2	mEq/L	NULL	NULL	101.5	mEq/L	128	mg/dL	5.3	%	13	mEq/L	7.42	units	39.25	mm Hg
14666832	70	F	BLACK/AFRICAN AMERICAN	73.8667	155	Medicare	English	SINGLE	CCU	3.3	K/uL	3.13	m/uL	NULL	NULL	NULL	NULL	166	K/uL	10.4	g/dL	13.2	%	31.2	%	NULL	NULL	NULL	NULL	7.9	g/dL	143.67	mEq/L	4	mEq/L	8.4	mg/dL	107	mEq/L	109	mg/dL	5.3	%	11	mEq/L	7.45	units	39	mm Hg
14670278	71	M	WHITE	74	175	Medicare	English	MARRIED	CVICU	24.9	K/uL	3.64	m/uL	25.45	K/uL	2.93	K/uL	150	K/uL	11.25	g/dL	12.68	%	32.65	%	NULL	NULL	NULL	NULL	NULL	NULL	128	mEq/L	4.5	mEq/L	NULL	NULL	97.5	mEq/L	122.33	mg/dL	NULL	NULL	17.25	mEq/L	7.38	units	34.27	mm Hg
14673399	62	F	WHITE	80.6	NULL	Private	English	DIVORCED	TSICU	11.4	K/uL	3.66	m/uL	NULL	NULL	NULL	NULL	233	K/uL	10.75	g/dL	12.75	%	34.1	%	NULL	NULL	NULL	NULL	NULL	NULL	136	mEq/L	4.25	mEq/L	8.4	mg/dL	101.5	mEq/L	121	mg/dL	NULL	NULL	10.5	mEq/L	NULL	NULL	NULL	NULL
14673800	75	F	WHITE	83	NULL	Medicare	English	SINGLE	TSICU	6.25	K/uL	3.94	m/uL	NULL	NULL	NULL	NULL	187.5	K/uL	11.4	g/dL	14.4	%	34.9	%	NULL	NULL	NULL	NULL	NULL	NULL	140.5	mEq/L	3.85	mEq/L	8.9	mg/dL	108	mEq/L	135	mg/dL	NULL	NULL	11	mEq/L	NULL	NULL	NULL	NULL
14677796	86	F	WHITE	61	NULL	Medicare	English	MARRIED	Neuro Intermediate	5.6	K/uL	3.51	m/uL	NULL	NULL	NULL	NULL	158	K/uL	11.3	g/dL	21.1	%	36.5	%	3.9	g/dL	NULL	NULL	NULL	NULL	144.33	mEq/L	5.53	mEq/L	8.88	mg/dL	105	mEq/L	112	mg/dL	5.8	%	17.33	mEq/L	NULL	NULL	NULL	NULL
14678292	52	F	WHITE	69.2	165	Private	English	MARRIED	Neuro SICU	8	K/uL	3.49	m/uL	NULL	NULL	NULL	NULL	188	K/uL	10.2	g/dL	13.4	%	32.9	%	3.5	g/dL	NULL	NULL	NULL	NULL	142.5	mEq/L	3.6	mEq/L	7.85	mg/dL	111	mEq/L	87.5	mg/dL	NULL	NULL	12	mEq/L	7.36	units	40	mm Hg
14678626	45	M	WHITE - OTHER EUROPEAN	105.95	170	Private	English	MARRIED	CVICU	19.7	K/uL	3.75	m/uL	15.16	K/uL	4.92	K/uL	230	K/uL	10.4	g/dL	12.77	%	33.48	%	NULL	NULL	NULL	NULL	NULL	NULL	137	mEq/L	4.9	mEq/L	NULL	NULL	109.5	mEq/L	126.5	mg/dL	NULL	NULL	7	mEq/L	7.32	units	45.86	mm Hg
14679785	63	M	WHITE	68.6	NULL	Medicare	English	DIVORCED	MICU/SICU	10.1	K/uL	3.28	m/uL	7.68	K/uL	1.92	K/uL	83	K/uL	11.1	g/dL	19.8	%	32	%	2.8	g/dL	NULL	NULL	NULL	NULL	133	mEq/L	3.73	mEq/L	8.97	mg/dL	96.33	mEq/L	123.33	mg/dL	NULL	NULL	11.67	mEq/L	7.42	units	42	mm Hg
14681119	74	F	WHITE	113.2	NULL	Private	English	SINGLE	Neuro Intermediate	10.4	K/uL	2.86	m/uL	NULL	NULL	NULL	NULL	300	K/uL	8	g/dL	18.3	%	26.9	%	NULL	NULL	NULL	NULL	NULL	NULL	140	mEq/L	4.1	mEq/L	8.3	mg/dL	103	mEq/L	83	mg/dL	NULL	NULL	15	mEq/L	7.41	units	43.5	mm Hg
14684244	62	F	WHITE	85.2	160	Medicare	English	DIVORCED	MICU/SICU	16.4	K/uL	4.61	m/uL	NULL	NULL	NULL	NULL	365	K/uL	13.5	g/dL	14.2	%	45.2	%	NULL	NULL	NULL	NULL	NULL	NULL	135	mEq/L	4.2	mEq/L	9	mg/dL	92	mEq/L	173	mg/dL	NULL	NULL	6	mEq/L	7.23	units	94.67	mm Hg
14686624	91	F	UNKNOWN	57.3	152	Medicare	English	NULL	MICU/SICU	16.77	K/uL	2.62	m/uL	16.29	K/uL	1.9	K/uL	189.33	K/uL	7.5	g/dL	14.87	%	24.67	%	NULL	NULL	NULL	NULL	NULL	NULL	145.75	mEq/L	5.48	mEq/L	7.98	mg/dL	110.25	mEq/L	119.25	mg/dL	NULL	NULL	19	mEq/L	7.25	units	43.8	mm Hg
14687028	80	F	UNKNOWN	100	163	Medicare	English	NULL	MICU	7.3	K/uL	3.66	m/uL	NULL	NULL	NULL	NULL	156.5	K/uL	10.75	g/dL	17.55	%	35	%	2.6	g/dL	NULL	NULL	NULL	NULL	137	mEq/L	4.2	mEq/L	7.3	mg/dL	105	mEq/L	248.5	mg/dL	NULL	NULL	11	mEq/L	7.28	units	56.8	mm Hg
14687805	88	M	BLACK/AFRICAN AMERICAN	56.2	180	Medicare	English	MARRIED	CVICU	18.75	K/uL	2.82	m/uL	NULL	NULL	NULL	NULL	394	K/uL	8.65	g/dL	19.25	%	26.6	%	NULL	NULL	NULL	NULL	NULL	NULL	143	mEq/L	5.35	mEq/L	9.05	mg/dL	106	mEq/L	119	mg/dL	NULL	NULL	12	mEq/L	7.38	units	41	mm Hg
14690735	89	F	WHITE	98.8	NULL	Medicare	English	MARRIED	MICU/SICU	6.6	K/uL	3.17	m/uL	NULL	NULL	NULL	NULL	279	K/uL	8.8	g/dL	16.6	%	31.8	%	3.2	g/dL	NULL	NULL	NULL	NULL	147	mEq/L	4.25	mEq/L	9.8	mg/dL	99.5	mEq/L	113.5	mg/dL	NULL	NULL	9.5	mEq/L	7.31	units	87.4	mm Hg
14698979	73	F	WHITE	56.9	173	Medicare	English	MARRIED	MICU	12.05	K/uL	3.57	m/uL	NULL	NULL	NULL	NULL	86.75	K/uL	10.03	g/dL	14.63	%	30	%	2.95	g/dL	NULL	NULL	NULL	NULL	135.5	mEq/L	4	mEq/L	7.2	mg/dL	100	mEq/L	137.5	mg/dL	NULL	NULL	19.5	mEq/L	7.28	units	38	mm Hg
14699641	91	F	WHITE	44	147	Medicare	English	WIDOWED	Neuro Intermediate	16.7	K/uL	3.42	m/uL	11.82	K/uL	1.36	K/uL	243.5	K/uL	10.45	g/dL	14.8	%	34.3	%	3.9	g/dL	NULL	NULL	NULL	NULL	137.5	mEq/L	5.5	mEq/L	9	mg/dL	103.5	mEq/L	135	mg/dL	NULL	NULL	11	mEq/L	NULL	NULL	NULL	NULL
14700051	67	M	WHITE	112.95	175	Medicare	English	MARRIED	CVICU	10.65	K/uL	4.47	m/uL	NULL	NULL	NULL	NULL	271.5	K/uL	14.25	g/dL	12.25	%	40.85	%	4.1	g/dL	NULL	NULL	NULL	NULL	137.67	mEq/L	3.83	mEq/L	8.93	mg/dL	100.67	mEq/L	116	mg/dL	5.9	%	12.67	mEq/L	7.41	units	42	mm Hg
14701347	82	M	WHITE	90	183	Medicare	English	MARRIED	MICU	31.38	K/uL	3.01	m/uL	29.36	K/uL	0	K/uL	373.5	K/uL	9.43	g/dL	14.65	%	27.13	%	NULL	NULL	NULL	NULL	NULL	NULL	140	mEq/L	4.08	mEq/L	7.17	mg/dL	99.25	mEq/L	172.75	mg/dL	NULL	NULL	24	mEq/L	7.34	units	35.8	mm Hg
14702885	88	M	HISPANIC/LATINO - DOMINICAN	65.55	155	Medicaid	Spanish	MARRIED	MICU	8.8	K/uL	4.34	m/uL	NULL	NULL	NULL	NULL	1541	K/uL	8.3	g/dL	26.08	%	27.26	%	3.6	g/dL	NULL	NULL	NULL	NULL	138	mEq/L	4.2	mEq/L	9.07	mg/dL	101.67	mEq/L	237.67	mg/dL	NULL	NULL	17.33	mEq/L	7.35	units	35	mm Hg
14704448	93	F	WHITE	40	NULL	Medicare	English	SINGLE	MICU	NULL	NULL	NULL	NULL	NULL	NULL	NULL	NULL	NULL	NULL	NULL	NULL	NULL	NULL	NULL	NULL	NULL	NULL	NULL	NULL	NULL	NULL	NULL	NULL	NULL	NULL	NULL	NULL	NULL	NULL	NULL	NULL	NULL	NULL	NULL	NULL	7.43	units	44	mm Hg
14709180	88	F	WHITE	60.4	NULL	Medicare	Modern Greek (1453-)	WIDOWED	MICU/SICU	7.8	K/uL	4.15	m/uL	NULL	NULL	NULL	NULL	323	K/uL	11.3	g/dL	13.6	%	36	%	NULL	NULL	NULL	NULL	NULL	NULL	141	mEq/L	4.23	mEq/L	9.03	mg/dL	102.33	mEq/L	159.33	mg/dL	NULL	NULL	14	mEq/L	NULL	NULL	NULL	NULL
14719239	67	M	WHITE	61.35	178	Medicare	English	SINGLE	Neuro Intermediate	6.4	K/uL	3.94	m/uL	NULL	NULL	NULL	NULL	146	K/uL	12	g/dL	12.9	%	34.9	%	NULL	NULL	NULL	NULL	NULL	NULL	138	mEq/L	2.6	mEq/L	9	mg/dL	100	mEq/L	115	mg/dL	NULL	NULL	11	mEq/L	7.43	units	43.5	mm Hg
14720260	77	M	BLACK/AFRICAN AMERICAN	94.85	183	Medicare	English	DIVORCED	CCU	12.15	K/uL	5.3	m/uL	NULL	NULL	NULL	NULL	137.5	K/uL	13.15	g/dL	20.65	%	41.1	%	3	g/dL	NULL	NULL	NULL	NULL	140.2	mEq/L	5.12	mEq/L	9.08	mg/dL	103	mEq/L	110.8	mg/dL	NULL	NULL	12.8	mEq/L	7.38	units	50	mm Hg
14725980	54	F	WHITE	109	152	Medicare	English	SINGLE	MICU/SICU	8.2	K/uL	3.04	m/uL	4.43	K/uL	1.36	K/uL	166.33	K/uL	9.37	g/dL	13.67	%	27.67	%	NULL	NULL	NULL	NULL	NULL	NULL	137	mEq/L	3.7	mEq/L	7.45	mg/dL	108.5	mEq/L	149	mg/dL	NULL	NULL	11.5	mEq/L	7.33	units	40.75	mm Hg
14730231	59	M	WHITE	112.8	178	Medicare	English	SINGLE	MICU/SICU	6.1	K/uL	3.91	m/uL	NULL	NULL	NULL	NULL	235	K/uL	10.95	g/dL	18.7	%	31.95	%	0.6	g/dL	NULL	NULL	NULL	NULL	131.5	mEq/L	3.6	mEq/L	6.65	mg/dL	99.5	mEq/L	120	mg/dL	NULL	NULL	10	mEq/L	7.42	units	49	mm Hg
14730471	69	F	WHITE	59.3	NULL	Medicare	English	MARRIED	MICU/SICU	7.3	K/uL	4.25	m/uL	NULL	NULL	NULL	NULL	131	K/uL	12	g/dL	13.4	%	38.1	%	NULL	NULL	NULL	NULL	NULL	NULL	141	mEq/L	4.05	mEq/L	9.6	mg/dL	94	mEq/L	95.5	mg/dL	NULL	NULL	12.5	mEq/L	7.4	units	61	mm Hg
14733129	85	F	WHITE	59.5333	NULL	Medicare	English	WIDOWED	CCU	6.45	K/uL	3.42	m/uL	NULL	NULL	NULL	NULL	236	K/uL	9.97	g/dL	15.7	%	30.77	%	NULL	NULL	NULL	NULL	NULL	NULL	133	mEq/L	3.87	mEq/L	8.9	mg/dL	89.33	mEq/L	167.67	mg/dL	NULL	NULL	18.33	mEq/L	7.45	units	34.8	mm Hg
14734724	81	F	WHITE	68.2	160	Medicare	English	MARRIED	CCU	5.95	K/uL	3.56	m/uL	NULL	NULL	NULL	NULL	162.5	K/uL	9.35	g/dL	16.45	%	29.9	%	NULL	NULL	NULL	NULL	NULL	NULL	141	mEq/L	3.95	mEq/L	8.4	mg/dL	104	mEq/L	94.5	mg/dL	NULL	NULL	12.5	mEq/L	NULL	NULL	NULL	NULL
14735987	72	F	WHITE	68.8	152	Medicaid	English	DIVORCED	CCU	6.6	K/uL	3.71	m/uL	NULL	NULL	NULL	NULL	138	K/uL	10.3	g/dL	15.7	%	33.6	%	3.5	g/dL	NULL	NULL	NULL	NULL	143.5	mEq/L	3.7	mEq/L	8.55	mg/dL	104	mEq/L	103	mg/dL	NULL	NULL	19.5	mEq/L	7.47	units	36	mm Hg
14739811	62	F	WHITE	93.1	168	Medicare	English	SINGLE	CCU	18.1	K/uL	4.67	m/uL	10.83	K/uL	1.72	K/uL	165	K/uL	13.05	g/dL	17.5	%	41.9	%	NULL	NULL	NULL	NULL	NULL	NULL	129.33	mEq/L	5.9	mEq/L	8.67	mg/dL	93.67	mEq/L	130	mg/dL	NULL	NULL	23.33	mEq/L	7.18	units	43.5	mm Hg
14740163	74	M	UNKNOWN	65.9	NULL	Medicare	English	NULL	Neuro Intermediate	8.4	K/uL	3.98	m/uL	NULL	NULL	NULL	NULL	171	K/uL	12.5	g/dL	12.1	%	37.6	%	NULL	NULL	NULL	NULL	NULL	NULL	141	mEq/L	4	mEq/L	9.4	mg/dL	99	mEq/L	109	mg/dL	5.8	%	18	mEq/L	NULL	NULL	NULL	NULL
14741960	60	M	WHITE	81	NULL	Medicaid	English	MARRIED	SICU	21	K/uL	3.43	m/uL	17.72	K/uL	0.8	K/uL	226	K/uL	11.3	g/dL	13.6	%	33.3	%	3.6	g/dL	NULL	NULL	NULL	NULL	131	mEq/L	3.7	mEq/L	8.7	mg/dL	96	mEq/L	146	mg/dL	5.6	%	11	mEq/L	NULL	NULL	NULL	NULL
14751701	56	F	WHITE	56.1	160	Medicaid	English	DIVORCED	MICU	4.12	K/uL	2.5	m/uL	NULL	NULL	NULL	NULL	63.2	K/uL	8.08	g/dL	21.96	%	25.04	%	3.5	g/dL	NULL	NULL	NULL	NULL	136	mEq/L	5	mEq/L	9.63	mg/dL	102.33	mEq/L	132.67	mg/dL	NULL	NULL	19.67	mEq/L	7.28	units	35	mm Hg
14752143	78	M	WHITE	75.8	NULL	Medicare	English	DIVORCED	TSICU	20	K/uL	2.85	m/uL	21.71	K/uL	1.64	K/uL	155	K/uL	8.3	g/dL	17.1	%	25.93	%	NULL	NULL	NULL	NULL	NULL	NULL	143	mEq/L	4.3	mEq/L	8.3	mg/dL	113	mEq/L	102.5	mg/dL	NULL	NULL	13	mEq/L	NULL	NULL	NULL	NULL
14752764	88	M	WHITE	79.7	NULL	Medicare	English	MARRIED	TSICU	6.5	K/uL	3.83	m/uL	NULL	NULL	NULL	NULL	131	K/uL	12.55	g/dL	13.6	%	35.65	%	NULL	NULL	NULL	NULL	NULL	NULL	130	mEq/L	3.9	mEq/L	8.05	mg/dL	91.5	mEq/L	95	mg/dL	NULL	NULL	12.5	mEq/L	NULL	NULL	NULL	NULL
14760587	86	F	WHITE	63	NULL	Medicare	English	WIDOWED	MICU	14.7	K/uL	3.9	m/uL	NULL	NULL	NULL	NULL	323	K/uL	10.6	g/dL	15.1	%	35.8	%	NULL	NULL	NULL	NULL	NULL	NULL	144.5	mEq/L	5.25	mEq/L	8.2	mg/dL	111	mEq/L	121	mg/dL	NULL	NULL	21.5	mEq/L	7.13	units	36	mm Hg
14764877	67	F	WHITE	71	NULL	Medicare	English	NULL	PACU	11.47	K/uL	4.29	m/uL	NULL	NULL	NULL	NULL	190.67	K/uL	13	g/dL	13.03	%	37.9	%	NULL	NULL	NULL	NULL	NULL	NULL	136.67	mEq/L	3.67	mEq/L	7.8	mg/dL	103.67	mEq/L	102.33	mg/dL	NULL	NULL	10	mEq/L	7.35	units	42.33	mm Hg
14765393	57	M	HISPANIC/LATINO - PUERTO RICAN	112	NULL	Medicaid	English	SINGLE	TSICU	9	K/uL	4.19	m/uL	NULL	NULL	NULL	NULL	158	K/uL	11.3	g/dL	17.1	%	36.5	%	NULL	NULL	NULL	NULL	NULL	NULL	135	mEq/L	3.9	mEq/L	8.9	mg/dL	102	mEq/L	152	mg/dL	NULL	NULL	10	mEq/L	NULL	NULL	NULL	NULL
14773318	83	F	UNKNOWN	50	160	Medicare	English	NULL	SICU	4.87	K/uL	2.91	m/uL	NULL	NULL	NULL	NULL	100.67	K/uL	7.73	g/dL	17.67	%	25.67	%	NULL	NULL	NULL	NULL	NULL	NULL	137.5	mEq/L	4.1	mEq/L	8.55	mg/dL	98.5	mEq/L	137.5	mg/dL	NULL	NULL	13	mEq/L	NULL	NULL	NULL	NULL
14777368	60	M	WHITE	NULL	173	Medicaid	English	MARRIED	MICU/SICU	0.35	K/uL	2.89	m/uL	0.07	K/uL	0.3	K/uL	41.5	K/uL	7.65	g/dL	17.95	%	23.85	%	NULL	NULL	NULL	NULL	NULL	NULL	137	mEq/L	4.25	mEq/L	7.6	mg/dL	106	mEq/L	100	mg/dL	NULL	NULL	9	mEq/L	NULL	NULL	NULL	NULL
14780845	67	F	WHITE	86.2	NULL	Medicare	English	DIVORCED	CVICU	6.6	K/uL	3.96	m/uL	NULL	NULL	NULL	NULL	163	K/uL	12.9	g/dL	13.8	%	38.9	%	NULL	NULL	NULL	NULL	NULL	NULL	135.25	mEq/L	4.13	mEq/L	8.53	mg/dL	97	mEq/L	168.25	mg/dL	NULL	NULL	14.75	mEq/L	7.41	units	42	mm Hg
14783167	75	M	WHITE	105.9	170	Medicare	English	MARRIED	CCU	0.93	K/uL	2.59	m/uL	0.54	K/uL	0.55	K/uL	53.25	K/uL	9.6	g/dL	16.93	%	28.83	%	NULL	NULL	NULL	NULL	NULL	NULL	140.75	mEq/L	4.45	mEq/L	8.08	mg/dL	99.5	mEq/L	106.25	mg/dL	NULL	NULL	15.5	mEq/L	7.47	units	38.33	mm Hg
14785926	66	M	WHITE	87.95	178	Medicare	English	MARRIED	CVICU	17.18	K/uL	2.5	m/uL	15.34	K/uL	2.61	K/uL	160.75	K/uL	8.74	g/dL	13.13	%	26.66	%	NULL	NULL	NULL	NULL	NULL	NULL	138	mEq/L	4.75	mEq/L	NULL	NULL	111.5	mEq/L	108	mg/dL	NULL	NULL	6	mEq/L	7.32	units	46.6	mm Hg
14787905	64	M	WHITE	88.8	191	Medicare	English	SINGLE	CCU	12.6	K/uL	4.5	m/uL	8.58	K/uL	2.44	K/uL	57	K/uL	14.8	g/dL	15	%	44.17	%	3.7	g/dL	NULL	NULL	NULL	NULL	134.25	mEq/L	5.36	mEq/L	8.7	mg/dL	104.25	mEq/L	134	mg/dL	NULL	NULL	24.5	mEq/L	7.25	units	29.8	mm Hg
14796020	68	F	WHITE	51	NULL	Medicare	English	DIVORCED	TSICU	7	K/uL	3.87	m/uL	NULL	NULL	NULL	NULL	227	K/uL	11.6	g/dL	12.6	%	37.6	%	NULL	NULL	NULL	NULL	NULL	NULL	143	mEq/L	4.6	mEq/L	11.1	mg/dL	96	mEq/L	107	mg/dL	NULL	NULL	11	mEq/L	7.48	units	53.75	mm Hg
14798077	71	F	WHITE	117.9	NULL	Medicare	English	SINGLE	MICU	18.3	K/uL	4.1	m/uL	14.61	K/uL	2.18	K/uL	232	K/uL	12.1	g/dL	16.1	%	37.3	%	NULL	NULL	NULL	NULL	NULL	NULL	142	mEq/L	4.5	mEq/L	8.9	mg/dL	103	mEq/L	124	mg/dL	5.6	%	12	mEq/L	NULL	NULL	NULL	NULL
14798717	79	F	WHITE	43.8	NULL	Medicare	English	DIVORCED	MICU	19.94	K/uL	3.25	m/uL	16.66	K/uL	0.83	K/uL	383.43	K/uL	8.67	g/dL	14.57	%	26.26	%	NULL	NULL	NULL	NULL	NULL	NULL	131.33	mEq/L	5.23	mEq/L	7.57	mg/dL	88	mEq/L	129	mg/dL	NULL	NULL	22	mEq/L	7.35	units	43	mm Hg
14800808	73	M	WHITE	70.4	NULL	Medicare	English	SINGLE	MICU/SICU	7.4	K/uL	2.96	m/uL	NULL	NULL	NULL	NULL	177.67	K/uL	9.5	g/dL	16.1	%	27.68	%	3.2	g/dL	NULL	NULL	NULL	NULL	137.5	mEq/L	3.95	mEq/L	7.8	mg/dL	106	mEq/L	194.5	mg/dL	NULL	NULL	15	mEq/L	7.42	units	35.5	mm Hg
14805440	86	F	WHITE	46.2	NULL	Medicare	English	SINGLE	MICU	10.43	K/uL	2.6	m/uL	NULL	NULL	NULL	NULL	199.67	K/uL	7.83	g/dL	16.87	%	26.53	%	NULL	NULL	NULL	NULL	NULL	NULL	139.5	mEq/L	4.3	mEq/L	8.4	mg/dL	103	mEq/L	118	mg/dL	NULL	NULL	9.5	mEq/L	7.33	units	64	mm Hg
14805442	71	M	WHITE	94.7	184	Medicare	English	MARRIED	CVICU	14.2	K/uL	3.77	m/uL	12.07	K/uL	1.7	K/uL	168	K/uL	11.63	g/dL	12.9	%	34.05	%	NULL	NULL	NULL	NULL	NULL	NULL	135	mEq/L	4.8	mEq/L	7.8	mg/dL	104	mEq/L	129	mg/dL	NULL	NULL	14	mEq/L	7.34	units	40	mm Hg
14807419	81	F	WHITE	48	NULL	Medicare	English	WIDOWED	TSICU	8.8	K/uL	4.51	m/uL	7.84	K/uL	0.72	K/uL	89	K/uL	13.2	g/dL	14.4	%	42.3	%	NULL	NULL	NULL	NULL	NULL	NULL	139	mEq/L	7.3	mEq/L	7.65	mg/dL	104.5	mEq/L	106	mg/dL	NULL	NULL	19	mEq/L	7.17	units	55.67	mm Hg
14807966	89	M	WHITE	92.2	NULL	Medicare	Modern Greek (1453-)	MARRIED	CCU	6.5	K/uL	3.72	m/uL	5.34	K/uL	1.3	K/uL	130	K/uL	10.47	g/dL	15	%	32.27	%	3.7	g/dL	NULL	NULL	NULL	NULL	135	mEq/L	3.4	mEq/L	8.8	mg/dL	95.25	mEq/L	129	mg/dL	NULL	NULL	13.25	mEq/L	7.53	units	35.5	mm Hg
14811012	78	M	BLACK/AFRICAN AMERICAN	90	NULL	Medicare	English	SINGLE	MICU/SICU	8.8	K/uL	5	m/uL	NULL	NULL	NULL	NULL	282.5	K/uL	14.05	g/dL	14.5	%	44.45	%	NULL	NULL	NULL	NULL	NULL	NULL	140	mEq/L	4.05	mEq/L	9.4	mg/dL	99.5	mEq/L	135	mg/dL	NULL	NULL	15.5	mEq/L	7.38	units	48	mm Hg
14811560	63	F	WHITE	92.4	NULL	Private	English	DIVORCED	MICU	7.7	K/uL	3.79	m/uL	NULL	NULL	NULL	NULL	296	K/uL	11.6	g/dL	14.7	%	33.8	%	NULL	NULL	NULL	NULL	NULL	NULL	124	mEq/L	4.2	mEq/L	8.95	mg/dL	88	mEq/L	118	mg/dL	NULL	NULL	12.5	mEq/L	NULL	NULL	NULL	NULL
14813183	81	F	ASIAN - CHINESE	56.2	NULL	Medicare	English	WIDOWED	Neuro Intermediate	NULL	NULL	NULL	NULL	NULL	NULL	NULL	NULL	NULL	NULL	NULL	NULL	NULL	NULL	NULL	NULL	NULL	NULL	NULL	NULL	NULL	NULL	NULL	NULL	NULL	NULL	NULL	NULL	NULL	NULL	NULL	NULL	NULL	NULL	NULL	NULL	NULL	NULL	NULL	NULL
14815813	86	M	WHITE	86.9	NULL	Medicare	English	MARRIED	MICU/SICU	6.1	K/uL	3.33	m/uL	NULL	NULL	NULL	NULL	161	K/uL	10.27	g/dL	14	%	31.93	%	NULL	NULL	NULL	NULL	NULL	NULL	134	mEq/L	4.5	mEq/L	8.1	mg/dL	109	mEq/L	109	mg/dL	NULL	NULL	10	mEq/L	NULL	NULL	NULL	NULL
14823401	73	F	UNKNOWN	78.3	152	Medicare	American Sign Language	NULL	CVICU	18.43	K/uL	3.91	m/uL	14.34	K/uL	0.92	K/uL	160.86	K/uL	13.51	g/dL	12.97	%	40.14	%	2.6	g/dL	NULL	NULL	NULL	NULL	129.17	mEq/L	3.54	mEq/L	6.88	mg/dL	91.83	mEq/L	302.83	mg/dL	NULL	NULL	21.17	mEq/L	7.28	units	48.45	mm Hg
14834029	89	F	WHITE	61.7	NULL	Medicare	Italian	WIDOWED	MICU/SICU	23.4	K/uL	2.97	m/uL	21.05	K/uL	0.96	K/uL	295.67	K/uL	7.6	g/dL	17	%	25.1	%	NULL	NULL	NULL	NULL	NULL	NULL	133	mEq/L	5.03	mEq/L	9.7	mg/dL	96	mEq/L	125	mg/dL	NULL	NULL	21.33	mEq/L	7.38	units	35.5	mm Hg
14836177	79	M	WHITE	64	165	Medicare	English	MARRIED	SICU	7.8	K/uL	3.11	m/uL	3.61	K/uL	0.31	K/uL	98.67	K/uL	9.5	g/dL	12.77	%	28.5	%	NULL	NULL	NULL	NULL	NULL	NULL	137.33	mEq/L	4.1	mEq/L	7.9	mg/dL	103	mEq/L	165.33	mg/dL	NULL	NULL	14.67	mEq/L	7.4	units	43.29	mm Hg
14836368	71	M	WHITE	113.7	NULL	Medicare	English	WIDOWED	MICU/SICU	13.8	K/uL	3.86	m/uL	12.77	K/uL	0.87	K/uL	277	K/uL	12.2	g/dL	18.3	%	37.3	%	3.5	g/dL	NULL	NULL	NULL	NULL	137	mEq/L	5.1	mEq/L	8.9	mg/dL	102	mEq/L	172	mg/dL	NULL	NULL	19	mEq/L	NULL	NULL	NULL	NULL
14840089	62	M	WHITE	100.2	NULL	Medicare	English	SINGLE	MICU	14.4	K/uL	3.95	m/uL	NULL	NULL	NULL	NULL	196.5	K/uL	11.35	g/dL	17.05	%	37.75	%	NULL	NULL	NULL	NULL	NULL	NULL	139	mEq/L	5.3	mEq/L	9	mg/dL	91	mEq/L	165	mg/dL	NULL	NULL	11.5	mEq/L	7.34	units	77	mm Hg
14847272	78	M	ASIAN - CHINESE	66.5	NULL	Medicare	Chinese	MARRIED	MICU	8.03	K/uL	2.54	m/uL	NULL	NULL	NULL	NULL	140.33	K/uL	7.6	g/dL	15.53	%	24.3	%	NULL	NULL	NULL	NULL	NULL	NULL	145.33	mEq/L	4.87	mEq/L	7.9	mg/dL	108	mEq/L	170.67	mg/dL	NULL	NULL	19.67	mEq/L	7.42	units	34.33	mm Hg
14848901	63	M	WHITE	126	NULL	Medicare	English	DIVORCED	Neuro Intermediate	5.9	K/uL	3.48	m/uL	NULL	NULL	NULL	NULL	189	K/uL	11.6	g/dL	13.1	%	36.8	%	NULL	NULL	NULL	NULL	NULL	NULL	140	mEq/L	4.1	mEq/L	8.6	mg/dL	104	mEq/L	114	mg/dL	NULL	NULL	8	mEq/L	NULL	NULL	NULL	NULL
14849047	79	F	WHITE	50.1	NULL	Medicare	English	WIDOWED	MICU	8.4	K/uL	4.19	m/uL	NULL	NULL	NULL	NULL	290	K/uL	12.3	g/dL	15.1	%	36.5	%	NULL	NULL	NULL	NULL	NULL	NULL	135	mEq/L	4.3	mEq/L	8.6	mg/dL	100	mEq/L	152	mg/dL	5.2	%	17.5	mEq/L	7.41	units	29	mm Hg
14852409	86	M	WHITE - OTHER EUROPEAN	75	NULL	Medicare	Italian	MARRIED	MICU/SICU	31.6	K/uL	3.89	m/uL	30.34	K/uL	0.63	K/uL	228	K/uL	11.6	g/dL	14.8	%	36.7	%	NULL	NULL	NULL	NULL	NULL	NULL	140	mEq/L	4.3	mEq/L	8.7	mg/dL	100	mEq/L	118	mg/dL	NULL	NULL	14	mEq/L	NULL	NULL	NULL	NULL
14856000	86	F	WHITE	44.3	NULL	Medicare	English	MARRIED	MICU/SICU	14.3	K/uL	2.87	m/uL	14.01	K/uL	1.3	K/uL	164	K/uL	8.5	g/dL	14.35	%	27.3	%	NULL	NULL	NULL	NULL	NULL	NULL	138.33	mEq/L	4.2	mEq/L	9.13	mg/dL	94	mEq/L	119.33	mg/dL	NULL	NULL	13.33	mEq/L	7.35	units	76	mm Hg
14858346	78	M	WHITE	85.3	NULL	Medicare	English	WIDOWED	MICU/SICU	11.35	K/uL	4.02	m/uL	NULL	NULL	NULL	NULL	174	K/uL	12.65	g/dL	13.15	%	37.2	%	NULL	NULL	NULL	NULL	NULL	NULL	140.5	mEq/L	3.75	mEq/L	8.95	mg/dL	107.5	mEq/L	132.5	mg/dL	NULL	NULL	9	mEq/L	7.4	units	41.5	mm Hg
14860220	80	M	WHITE	91	NULL	Medicare	English	MARRIED	SICU	11.95	K/uL	4.86	m/uL	NULL	NULL	NULL	NULL	267.5	K/uL	14.75	g/dL	12.5	%	46.35	%	NULL	NULL	NULL	NULL	NULL	NULL	137.5	mEq/L	4.7	mEq/L	10.4	mg/dL	103.5	mEq/L	118.5	mg/dL	NULL	NULL	11.5	mEq/L	NULL	NULL	NULL	NULL
14868095	57	F	WHITE	111.8	170	Medicare	English	WIDOWED	Neuro Intermediate	15.5	K/uL	3.96	m/uL	NULL	NULL	NULL	NULL	304	K/uL	10.3	g/dL	15.4	%	32.2	%	NULL	NULL	NULL	NULL	NULL	NULL	143	mEq/L	3.3	mEq/L	9	mg/dL	105	mEq/L	129	mg/dL	NULL	NULL	17	mEq/L	NULL	NULL	NULL	NULL
14868295	71	F	WHITE	75.6	NULL	Medicare	English	DIVORCED	TSICU	13.75	K/uL	3.25	m/uL	NULL	NULL	NULL	NULL	505	K/uL	8.95	g/dL	15.05	%	29.05	%	NULL	NULL	NULL	NULL	NULL	NULL	143.5	mEq/L	3.85	mEq/L	8.2	mg/dL	113.5	mEq/L	109.5	mg/dL	NULL	NULL	11	mEq/L	NULL	NULL	NULL	NULL
14870594	74	F	BLACK/AFRICAN AMERICAN	72.5	NULL	Medicare	English	SINGLE	MICU	11.7	K/uL	5.22	m/uL	NULL	NULL	NULL	NULL	98	K/uL	13.2	g/dL	17.1	%	39.7	%	NULL	NULL	NULL	NULL	NULL	NULL	136	mEq/L	4.7	mEq/L	9.4	mg/dL	96	mEq/L	144	mg/dL	NULL	NULL	16	mEq/L	7.3	units	51.33	mm Hg
14874312	86	F	UNABLE TO OBTAIN	63.1	152	Medicare	English	NULL	CCU	14.35	K/uL	3.45	m/uL	NULL	NULL	NULL	NULL	337.5	K/uL	9.55	g/dL	15.6	%	30.2	%	1.9	g/dL	NULL	NULL	NULL	NULL	134.2	mEq/L	5.34	mEq/L	10.3	mg/dL	90.8	mEq/L	119.8	mg/dL	NULL	NULL	26.4	mEq/L	7.22	units	44	mm Hg
14878704	89	F	WHITE	57.7	NULL	Medicaid	English	DIVORCED	MICU	13.5	K/uL	4.06	m/uL	9.04	K/uL	2.8	K/uL	235	K/uL	13.03	g/dL	13	%	38.6	%	4.05	g/dL	NULL	NULL	NULL	NULL	135	mEq/L	4.58	mEq/L	9.6	mg/dL	98	mEq/L	139.75	mg/dL	NULL	NULL	17.5	mEq/L	7.42	units	43	mm Hg
14882068	87	M	WHITE	85.6667	NULL	Medicare	English	MARRIED	CVICU	5.53	K/uL	2.51	m/uL	NULL	NULL	NULL	NULL	106.33	K/uL	8.47	g/dL	17.23	%	26.3	%	3.7	g/dL	NULL	NULL	NULL	NULL	140	mEq/L	5.1	mEq/L	8.27	mg/dL	96.33	mEq/L	106	mg/dL	NULL	NULL	22	mEq/L	7.24	units	53.5	mm Hg
14887253	67	F	WHITE	52.4	157	Private	English	DIVORCED	MICU/SICU	15	K/uL	4.45	m/uL	NULL	NULL	NULL	NULL	349	K/uL	10.8	g/dL	14.6	%	37.4	%	NULL	NULL	NULL	NULL	NULL	NULL	139.5	mEq/L	4.45	mEq/L	7.95	mg/dL	101.5	mEq/L	156	mg/dL	NULL	NULL	17	mEq/L	7.2	units	81	mm Hg
14892207	88	F	OTHER	79	NULL	Medicaid	English	WIDOWED	MICU/SICU	2.8	K/uL	4.77	m/uL	NULL	NULL	NULL	NULL	123	K/uL	12.8	g/dL	15.9	%	41.5	%	4	g/dL	3.8	g/dL	7.8	g/dL	140	mEq/L	4.7	mEq/L	9.7	mg/dL	95	mEq/L	149	mg/dL	NULL	NULL	14	mEq/L	7.29	units	73.7	mm Hg
14893843	60	F	BLACK/AFRICAN AMERICAN	110.833	157	Medicaid	English	SINGLE	MICU/SICU	13.9	K/uL	3.84	m/uL	NULL	NULL	NULL	NULL	304	K/uL	10.95	g/dL	14.95	%	35.95	%	2.4	g/dL	NULL	NULL	NULL	NULL	133	mEq/L	3.48	mEq/L	7.2	mg/dL	94.6	mEq/L	187	mg/dL	NULL	NULL	16.6	mEq/L	7.17	units	66	mm Hg
14905397	82	M	WHITE	63.7	NULL	Medicare	English	SINGLE	MICU/SICU	9.2	K/uL	5.29	m/uL	5.73	K/uL	2.92	K/uL	220	K/uL	15.45	g/dL	13.45	%	49.65	%	4.7	g/dL	NULL	NULL	NULL	NULL	140.5	mEq/L	4.55	mEq/L	8.9	mg/dL	103.5	mEq/L	134.5	mg/dL	NULL	NULL	12.5	mEq/L	7.3	units	57.33	mm Hg
14905718	51	M	WHITE - OTHER EUROPEAN	74	178	Private	English	SINGLE	MICU/SICU	16.3	K/uL	2.62	m/uL	13.46	K/uL	0.76	K/uL	553	K/uL	8.3	g/dL	15.6	%	25.9	%	1.75	g/dL	NULL	NULL	NULL	NULL	136.5	mEq/L	6.4	mEq/L	8.4	mg/dL	105	mEq/L	769	mg/dL	NULL	NULL	10.5	mEq/L	NULL	NULL	NULL	NULL
14909579	69	M	WHITE	76	NULL	Medicare	English	MARRIED	TSICU	5.1	K/uL	3.53	m/uL	NULL	NULL	NULL	NULL	164.67	K/uL	10	g/dL	16.97	%	31.33	%	3.5	g/dL	NULL	NULL	NULL	NULL	131.33	mEq/L	4.6	mEq/L	8.17	mg/dL	101.67	mEq/L	141	mg/dL	NULL	NULL	14.33	mEq/L	7.35	units	42	mm Hg
14909819	80	M	UNKNOWN	65.5	NULL	Medicare	Spanish	NULL	Neuro SICU	12.15	K/uL	5.26	m/uL	11.61	K/uL	1.69	K/uL	186	K/uL	16.8	g/dL	12.55	%	49.85	%	3.8	g/dL	NULL	NULL	NULL	NULL	141.5	mEq/L	5	mEq/L	9.65	mg/dL	103.5	mEq/L	126	mg/dL	6.6	%	19	mEq/L	NULL	NULL	NULL	NULL
14909918	90	M	WHITE	82	NULL	Private	English	MARRIED	CVICU	19.43	K/uL	4.5	m/uL	NULL	NULL	NULL	NULL	288.67	K/uL	13.33	g/dL	14.23	%	40.77	%	NULL	NULL	NULL	NULL	NULL	NULL	137.5	mEq/L	4.75	mEq/L	8.98	mg/dL	95.75	mEq/L	138.25	mg/dL	NULL	NULL	16.75	mEq/L	7.4	units	43	mm Hg
14911129	66	M	WHITE	70.4	NULL	Medicare	English	DIVORCED	MICU	7.9	K/uL	3.79	m/uL	NULL	NULL	NULL	NULL	207	K/uL	12.2	g/dL	12.9	%	36.6	%	3.7	g/dL	NULL	NULL	NULL	NULL	143	mEq/L	4.2	mEq/L	8.6	mg/dL	106	mEq/L	113	mg/dL	NULL	NULL	21	mEq/L	NULL	NULL	NULL	NULL
14911535	78	F	WHITE	60	168	Medicare	English	WIDOWED	CVICU	6.5	K/uL	3.89	m/uL	NULL	NULL	NULL	NULL	187.5	K/uL	12.05	g/dL	13.4	%	36.7	%	NULL	NULL	NULL	NULL	NULL	NULL	137	mEq/L	3.75	mEq/L	8.6	mg/dL	98.5	mEq/L	111	mg/dL	NULL	NULL	17	mEq/L	NULL	NULL	NULL	NULL
14913999	92	F	WHITE	61.45	NULL	Medicare	English	WIDOWED	Neuro Intermediate	5.4	K/uL	3.71	m/uL	NULL	NULL	NULL	NULL	164	K/uL	11.1	g/dL	13.7	%	34.3	%	NULL	NULL	NULL	NULL	NULL	NULL	142	mEq/L	3.7	mEq/L	8.3	mg/dL	106	mEq/L	99	mg/dL	5.7	%	12	mEq/L	NULL	NULL	NULL	NULL
14916904	89	F	WHITE	42.3	NULL	Medicare	English	WIDOWED	Neuro Intermediate	11.1	K/uL	4.08	m/uL	NULL	NULL	NULL	NULL	258	K/uL	11.1	g/dL	14	%	37	%	NULL	NULL	NULL	NULL	NULL	NULL	142	mEq/L	4.4	mEq/L	8.8	mg/dL	101	mEq/L	94	mg/dL	NULL	NULL	12	mEq/L	NULL	NULL	NULL	NULL
14920657	64	F	WHITE	111.5	170	Private	English	SINGLE	CVICU	14.35	K/uL	4.33	m/uL	NULL	NULL	NULL	NULL	192.5	K/uL	13.25	g/dL	13.25	%	40.2	%	3.7	g/dL	NULL	NULL	NULL	NULL	142	mEq/L	3.8	mEq/L	8.9	mg/dL	105	mEq/L	107	mg/dL	5.5	%	15	mEq/L	7.34	units	52	mm Hg
14921417	79	M	WHITE	75	168	Medicare	English	MARRIED	SICU	10.3	K/uL	3.89	m/uL	NULL	NULL	NULL	NULL	135	K/uL	12	g/dL	14.4	%	37	%	NULL	NULL	NULL	NULL	NULL	NULL	148.5	mEq/L	4.05	mEq/L	9	mg/dL	102.5	mEq/L	143	mg/dL	NULL	NULL	17	mEq/L	7.42	units	48.5	mm Hg
14922245	77	M	BLACK/AFRICAN AMERICAN	68.3	NULL	Medicaid	English	SINGLE	MICU/SICU	17.83	K/uL	2.5	m/uL	14.6	K/uL	1.51	K/uL	175	K/uL	7.8	g/dL	25.57	%	24.23	%	2.4	g/dL	NULL	NULL	NULL	NULL	142.5	mEq/L	4.2	mEq/L	8.15	mg/dL	111	mEq/L	98	mg/dL	NULL	NULL	13	mEq/L	NULL	NULL	NULL	NULL
14923283	57	M	WHITE	78.2	175	Medicaid	English	DIVORCED	MICU/SICU	11.95	K/uL	3.97	m/uL	10.98	K/uL	0.57	K/uL	202	K/uL	13.7	g/dL	13.2	%	41.4	%	NULL	NULL	NULL	NULL	NULL	NULL	142	mEq/L	4.65	mEq/L	9.2	mg/dL	104.5	mEq/L	181	mg/dL	NULL	NULL	16	mEq/L	7.36	units	46	mm Hg
14925425	92	M	UNKNOWN	74.3	NULL	Medicare	Spanish	NULL	Neuro Intermediate	7.8	K/uL	4.77	m/uL	NULL	NULL	NULL	NULL	191	K/uL	12.6	g/dL	13	%	39.4	%	NULL	NULL	NULL	NULL	NULL	NULL	145	mEq/L	4.2	mEq/L	9.8	mg/dL	106	mEq/L	100	mg/dL	NULL	NULL	15	mEq/L	NULL	NULL	NULL	NULL
14936496	77	F	WHITE	47.6	165	Medicare	English	WIDOWED	TSICU	18.1	K/uL	3.34	m/uL	10.42	K/uL	0.65	K/uL	191.5	K/uL	9.4	g/dL	14.75	%	29.65	%	NULL	NULL	NULL	NULL	NULL	NULL	135.67	mEq/L	5.1	mEq/L	9.17	mg/dL	99.67	mEq/L	131	mg/dL	NULL	NULL	10.67	mEq/L	7.37	units	46	mm Hg
14946447	73	F	UNKNOWN	68.45	165	Medicare	English	NULL	Neuro SICU	8.55	K/uL	3.54	m/uL	6.72	K/uL	0.57	K/uL	146	K/uL	10.98	g/dL	15.05	%	35.43	%	3.1	g/dL	NULL	NULL	NULL	NULL	143.33	mEq/L	4.37	mEq/L	9.43	mg/dL	109	mEq/L	107	mg/dL	NULL	NULL	11.67	mEq/L	7.31	units	50.67	mm Hg
14946461	62	F	WHITE	77.5	NULL	Private	English	MARRIED	MICU/SICU	5.1	K/uL	3.66	m/uL	NULL	NULL	NULL	NULL	365	K/uL	10.05	g/dL	14.65	%	32.3	%	NULL	NULL	NULL	NULL	NULL	NULL	139.33	mEq/L	4.27	mEq/L	9	mg/dL	96	mEq/L	112.33	mg/dL	NULL	NULL	15	mEq/L	7.38	units	56	mm Hg
14953216	90	F	UNKNOWN	89.6	NULL	Medicare	English	NULL	MICU/SICU	19.52	K/uL	3.21	m/uL	NULL	NULL	NULL	NULL	78.4	K/uL	9.58	g/dL	14.34	%	31.3	%	NULL	NULL	NULL	NULL	NULL	NULL	141.5	mEq/L	5.25	mEq/L	7.45	mg/dL	111.5	mEq/L	123.5	mg/dL	NULL	NULL	5	mEq/L	7.29	units	53.67	mm Hg
14954256	85	F	BLACK/AFRICAN AMERICAN	72.3	NULL	Medicare	English	WIDOWED	MICU	8.2	K/uL	3.32	m/uL	NULL	NULL	NULL	NULL	257	K/uL	9	g/dL	12	%	32	%	NULL	NULL	NULL	NULL	NULL	NULL	147	mEq/L	4.5	mEq/L	9.6	mg/dL	92.5	mEq/L	119.5	mg/dL	NULL	NULL	9.5	mEq/L	7.34	units	91.5	mm Hg
14959313	68	F	WHITE	114.2	157	Medicare	English	SINGLE	CCU	11.28	K/uL	3.48	m/uL	NULL	NULL	NULL	NULL	264.75	K/uL	8.4	g/dL	17	%	28.9	%	NULL	NULL	NULL	NULL	NULL	NULL	143.67	mEq/L	4.37	mEq/L	9.05	mg/dL	98.33	mEq/L	104.33	mg/dL	NULL	NULL	12.67	mEq/L	7.41	units	57.5	mm Hg
14962882	58	M	WHITE	78.8	178	Medicare	English	DIVORCED	CVICU	7	K/uL	2.79	m/uL	3.62	K/uL	1.02	K/uL	104	K/uL	8.67	g/dL	12.6	%	27.48	%	NULL	NULL	NULL	NULL	NULL	NULL	139.33	mEq/L	4.03	mEq/L	7.7	mg/dL	108	mEq/L	118	mg/dL	NULL	NULL	10	mEq/L	7.4	units	42.57	mm Hg
14968694	81	M	BLACK/AFRICAN AMERICAN	51.4	NULL	Medicare	English	MARRIED	MICU/SICU	14	K/uL	3.11	m/uL	NULL	NULL	NULL	NULL	207	K/uL	7.3	g/dL	23.4	%	22.3	%	NULL	NULL	NULL	NULL	NULL	NULL	142	mEq/L	2.7	mEq/L	8.8	mg/dL	104	mEq/L	126	mg/dL	NULL	NULL	14	mEq/L	NULL	NULL	NULL	NULL
14971086	51	M	WHITE	100.3	173	Medicaid	English	MARRIED	SICU	13.65	K/uL	3.29	m/uL	NULL	NULL	NULL	NULL	254	K/uL	9.8	g/dL	13.9	%	30.43	%	NULL	NULL	NULL	NULL	NULL	NULL	134	mEq/L	4.47	mEq/L	8.27	mg/dL	99	mEq/L	137.67	mg/dL	NULL	NULL	14	mEq/L	7.43	units	38	mm Hg
14972887	63	M	WHITE	125.7	178	Medicaid	English	SINGLE	SICU	8.68	K/uL	3.89	m/uL	NULL	NULL	NULL	NULL	151.75	K/uL	11.58	g/dL	14.45	%	35.15	%	3.5	g/dL	NULL	NULL	NULL	NULL	138	mEq/L	3.85	mEq/L	8.45	mg/dL	101.5	mEq/L	133	mg/dL	NULL	NULL	12.75	mEq/L	7.37	units	43.5	mm Hg
14978669	58	F	PATIENT DECLINED TO ANSWER	51.2	NULL	Medicare	English	DIVORCED	Neuro Intermediate	25.4	K/uL	3.52	m/uL	NULL	NULL	NULL	NULL	449	K/uL	11.4	g/dL	15.5	%	34.4	%	NULL	NULL	NULL	NULL	NULL	NULL	136	mEq/L	4.1	mEq/L	8.2	mg/dL	106	mEq/L	163	mg/dL	NULL	NULL	14	mEq/L	NULL	NULL	NULL	NULL
14981236	71	M	WHITE	89.6	187	Medicare	English	DIVORCED	CVICU	13.33	K/uL	3.12	m/uL	9.25	K/uL	1.55	K/uL	105.75	K/uL	9.63	g/dL	15.03	%	29.23	%	NULL	NULL	NULL	NULL	NULL	NULL	140	mEq/L	4.8	mEq/L	9	mg/dL	108.5	mEq/L	176	mg/dL	NULL	NULL	11.5	mEq/L	7.34	units	43.67	mm Hg
14983584	57	F	WHITE	94	NULL	Medicare	English	DIVORCED	MICU	NULL	NULL	NULL	NULL	NULL	NULL	NULL	NULL	NULL	NULL	NULL	NULL	NULL	NULL	NULL	NULL	NULL	NULL	NULL	NULL	NULL	NULL	NULL	NULL	NULL	NULL	NULL	NULL	NULL	NULL	NULL	NULL	NULL	NULL	NULL	NULL	NULL	NULL	NULL	NULL
14984198	50	M	WHITE	80	NULL	Medicare	English	SINGLE	CCU	5.57	K/uL	5.08	m/uL	NULL	NULL	NULL	NULL	222.33	K/uL	13.2	g/dL	20	%	41.13	%	NULL	NULL	NULL	NULL	NULL	NULL	139	mEq/L	4.13	mEq/L	8	mg/dL	102.33	mEq/L	94.33	mg/dL	NULL	NULL	16.67	mEq/L	7.46	units	38	mm Hg
14993346	58	M	UNABLE TO OBTAIN	70	183	Medicare	English	NULL	Neuro Intermediate	9	K/uL	2.25	m/uL	NULL	NULL	NULL	NULL	152	K/uL	8.25	g/dL	13.6	%	25.65	%	NULL	NULL	NULL	NULL	NULL	NULL	137.33	mEq/L	3.8	mEq/L	7.3	mg/dL	101.5	mEq/L	105	mg/dL	NULL	NULL	17	mEq/L	7.39	units	32.33	mm Hg
14993854	47	M	WHITE	106	NULL	Medicare	English	SINGLE	MICU/SICU	4.65	K/uL	4.86	m/uL	NULL	NULL	NULL	NULL	109	K/uL	12.15	g/dL	17	%	40.45	%	NULL	NULL	NULL	NULL	NULL	NULL	140	mEq/L	4.35	mEq/L	9.05	mg/dL	102.5	mEq/L	160.5	mg/dL	NULL	NULL	13.5	mEq/L	7.34	units	60	mm Hg
14995394	97	M	WHITE	72.2	NULL	Medicare	English	SINGLE	MICU/SICU	21.2	K/uL	2.77	m/uL	17.47	K/uL	1.79	K/uL	52.5	K/uL	8.6	g/dL	24.25	%	27	%	NULL	NULL	NULL	NULL	NULL	NULL	132.67	mEq/L	3.5	mEq/L	7.55	mg/dL	96.67	mEq/L	168	mg/dL	NULL	NULL	20	mEq/L	7.41	units	33	mm Hg
15006805	84	F	WHITE	64	NULL	Medicare	English	WIDOWED	CCU	NULL	K/uL	NULL	m/uL	NULL	NULL	NULL	NULL	NULL	K/uL	NULL	g/dL	NULL	%	NULL	%	NULL	NULL	NULL	NULL	NULL	NULL	134.5	mEq/L	3.35	mEq/L	8.65	mg/dL	94.5	mEq/L	116.5	mg/dL	NULL	NULL	11	mEq/L	NULL	NULL	NULL	NULL
15007699	63	M	NATIVE HAWAIIAN OR OTHER PACIFIC ISLANDER	60.2	NULL	Private	English	SINGLE	CCU	7.1	K/uL	4.51	m/uL	NULL	NULL	NULL	NULL	137	K/uL	13.75	g/dL	12.95	%	39.8	%	NULL	NULL	NULL	NULL	NULL	NULL	135	mEq/L	4.65	mEq/L	8.05	mg/dL	98	mEq/L	170.5	mg/dL	5.2	%	20	mEq/L	7.41	units	41	mm Hg
15009524	78	F	UNKNOWN	44.9	157	Medicare	English	NULL	TSICU	10.97	K/uL	2.48	m/uL	9.14	K/uL	1.2	K/uL	104.33	K/uL	7.45	g/dL	16.7	%	22.82	%	2.45	g/dL	NULL	NULL	NULL	NULL	136.8	mEq/L	4.34	mEq/L	7.78	mg/dL	104	mEq/L	121.2	mg/dL	NULL	NULL	8.6	mEq/L	7.36	units	45.56	mm Hg
15017254	73	M	WHITE	104.3	178	Medicare	English	MARRIED	CVICU	18.18	K/uL	3.8	m/uL	12.63	K/uL	2.66	K/uL	123	K/uL	11.98	g/dL	12.55	%	36.38	%	NULL	NULL	NULL	NULL	NULL	NULL	142	mEq/L	5	mEq/L	NULL	NULL	108.5	mEq/L	102	mg/dL	NULL	NULL	11.5	mEq/L	7.34	units	45.14	mm Hg
15021968	76	F	WHITE	60.8	NULL	Medicare	English	SINGLE	MICU	6.53	K/uL	3.61	m/uL	NULL	NULL	NULL	NULL	193.33	K/uL	10.67	g/dL	16.23	%	35.23	%	NULL	NULL	NULL	NULL	NULL	NULL	136.5	mEq/L	5.98	mEq/L	7.8	mg/dL	94.25	mEq/L	109.75	mg/dL	NULL	NULL	23.75	mEq/L	7.27	units	49	mm Hg
15027143	75	M	WHITE	79.9	NULL	Medicare	English	SINGLE	MICU	11.4	K/uL	4.23	m/uL	NULL	NULL	NULL	NULL	230	K/uL	13.9	g/dL	14.3	%	42.7	%	3.5	g/dL	NULL	NULL	NULL	NULL	139.5	mEq/L	4.95	mEq/L	9.15	mg/dL	104	mEq/L	98.5	mg/dL	NULL	NULL	12.5	mEq/L	7.35	units	43	mm Hg
15037001	76	M	OTHER	93.7	175	Medicare	English	MARRIED	CCU	11.45	K/uL	3.55	m/uL	NULL	NULL	NULL	NULL	231.5	K/uL	11.25	g/dL	13.55	%	33.15	%	3.2	g/dL	NULL	NULL	NULL	NULL	136.5	mEq/L	4.05	mEq/L	8.55	mg/dL	100.5	mEq/L	103	mg/dL	NULL	NULL	13	mEq/L	NULL	NULL	NULL	NULL
15037153	84	M	WHITE	94.5	NULL	Medicare	English	MARRIED	CCU	8.3	K/uL	4.24	m/uL	NULL	NULL	NULL	NULL	190	K/uL	12.85	g/dL	12.9	%	38.8	%	NULL	NULL	NULL	NULL	NULL	NULL	143	mEq/L	4.75	mEq/L	8.7	mg/dL	105.5	mEq/L	111.5	mg/dL	NULL	NULL	14	mEq/L	NULL	NULL	NULL	NULL
15039323	63	M	WHITE	77.1	173	Private	English	SINGLE	CVICU	24.97	K/uL	3.59	m/uL	18.36	K/uL	2.46	K/uL	205.67	K/uL	12.17	g/dL	12.07	%	37	%	NULL	NULL	NULL	NULL	NULL	NULL	141	mEq/L	4.5	mEq/L	7.1	mg/dL	111.5	mEq/L	96	mg/dL	NULL	NULL	10	mEq/L	7.35	units	39.25	mm Hg
15052797	53	F	WHITE	102.8	157	Medicare	English	SINGLE	Neuro SICU	8.5	K/uL	3.91	m/uL	4.41	K/uL	3.08	K/uL	214	K/uL	11.5	g/dL	13.7	%	34.5	%	3.4	g/dL	NULL	NULL	NULL	NULL	139	mEq/L	3.5	mEq/L	8.4	mg/dL	103	mEq/L	115	mg/dL	6	%	14	mEq/L	7.4	units	40	mm Hg
15057293	77	M	WHITE	77	178	Medicare	English	SINGLE	CVICU	8.43	K/uL	2.56	m/uL	4.62	K/uL	1.49	K/uL	118	K/uL	8.93	g/dL	13.63	%	26.75	%	NULL	NULL	NULL	NULL	NULL	NULL	142	mEq/L	4.2	mEq/L	NULL	NULL	109	mEq/L	96	mg/dL	NULL	NULL	9.5	mEq/L	7.4	units	43.33	mm Hg
15057581	61	F	WHITE	60	157	Medicare	English	DIVORCED	SICU	18.65	K/uL	3.93	m/uL	NULL	NULL	NULL	NULL	105.5	K/uL	12.15	g/dL	15.58	%	35.75	%	1.65	g/dL	NULL	NULL	NULL	NULL	130	mEq/L	3.9	mEq/L	7.15	mg/dL	101.25	mEq/L	121.75	mg/dL	NULL	NULL	13.25	mEq/L	7.22	units	42	mm Hg
15066341	79	M	WHITE	81.5	NULL	Medicare	English	MARRIED	SICU	9.5	K/uL	4.32	m/uL	NULL	NULL	NULL	NULL	187	K/uL	14.7	g/dL	12.6	%	43.3	%	NULL	NULL	NULL	NULL	NULL	NULL	138	mEq/L	4.1	mEq/L	NULL	NULL	99	mEq/L	143	mg/dL	NULL	NULL	11	mEq/L	7.4	units	46	mm Hg
15067576	80	M	UNKNOWN	83.85	185	Medicare	English	NULL	TSICU	14.5	K/uL	3.76	m/uL	NULL	NULL	NULL	NULL	157	K/uL	12.7	g/dL	13.7	%	37.4	%	NULL	NULL	NULL	NULL	NULL	NULL	139	mEq/L	3.3	mEq/L	8	mg/dL	104	mEq/L	131	mg/dL	NULL	NULL	12	mEq/L	7.39	units	39	mm Hg
15073417	72	M	UNKNOWN	77.75	178	Private	English	NULL	Neuro SICU	7	K/uL	3.95	m/uL	NULL	NULL	NULL	NULL	158	K/uL	13.4	g/dL	11.9	%	40.4	%	NULL	NULL	NULL	NULL	NULL	NULL	140	mEq/L	3.9	mEq/L	9.4	mg/dL	103	mEq/L	102	mg/dL	5.3	%	15	mEq/L	NULL	NULL	NULL	NULL
15075859	73	M	WHITE	106.4	188	Private	English	MARRIED	CVICU	21.4	K/uL	2.76	m/uL	14.51	K/uL	1.98	K/uL	171	K/uL	8.8	g/dL	16.18	%	26.46	%	NULL	NULL	NULL	NULL	NULL	NULL	136	mEq/L	4.75	mEq/L	9.3	mg/dL	104.5	mEq/L	127	mg/dL	NULL	NULL	14	mEq/L	7.36	units	41.36	mm Hg
15079048	93	M	WHITE	91.9	NULL	Medicare	English	WIDOWED	MICU	28	K/uL	3.9	m/uL	NULL	NULL	NULL	NULL	29	K/uL	11.7	g/dL	12.9	%	35.7	%	NULL	NULL	NULL	NULL	NULL	NULL	146	mEq/L	3.75	mEq/L	7.75	mg/dL	106	mEq/L	165.5	mg/dL	NULL	NULL	15.5	mEq/L	NULL	NULL	NULL	NULL
15079218	80	M	WHITE - OTHER EUROPEAN	66.7	170	Medicare	English	MARRIED	CCU	9.5	K/uL	4.28	m/uL	12.22	K/uL	0.74	K/uL	288.33	K/uL	11.37	g/dL	14.43	%	36.27	%	3.1	g/dL	NULL	NULL	NULL	NULL	141	mEq/L	4.47	mEq/L	9.4	mg/dL	108.67	mEq/L	148	mg/dL	NULL	NULL	13	mEq/L	7.34	units	45	mm Hg
15082730	78	M	OTHER	79.55	165	Medicare	English	WIDOWED	CVICU	13.37	K/uL	3.47	m/uL	6.73	K/uL	3.71	K/uL	124	K/uL	10.83	g/dL	13.73	%	33.98	%	NULL	NULL	NULL	NULL	NULL	NULL	140	mEq/L	4.8	mEq/L	8	mg/dL	109.5	mEq/L	126	mg/dL	NULL	NULL	9.5	mEq/L	7.3	units	47.38	mm Hg
15084163	64	F	PORTUGUESE	128	NULL	Medicaid	English	SINGLE	SICU	19.9	K/uL	4.7	m/uL	NULL	NULL	NULL	NULL	53.5	K/uL	15.4	g/dL	17.45	%	46.05	%	2.9	g/dL	NULL	NULL	NULL	NULL	135.25	mEq/L	2.85	mEq/L	8.05	mg/dL	97	mEq/L	89.25	mg/dL	NULL	NULL	15.75	mEq/L	7.4	units	38.5	mm Hg
15094587	86	F	WHITE	52.2	155	Medicare	English	WIDOWED	SICU	6.42	K/uL	2.94	m/uL	NULL	NULL	NULL	NULL	126.33	K/uL	9.15	g/dL	15.18	%	29.33	%	2.6	g/dL	NULL	NULL	NULL	NULL	137.5	mEq/L	5.03	mEq/L	7.63	mg/dL	100.75	mEq/L	137.25	mg/dL	NULL	NULL	20	mEq/L	7.22	units	41.93	mm Hg
15102238	67	M	WHITE	108.2	180	Private	English	MARRIED	SICU	8.81	K/uL	3.12	m/uL	8.5	K/uL	1.56	K/uL	115.56	K/uL	9.17	g/dL	14.68	%	28.22	%	NULL	NULL	NULL	NULL	NULL	NULL	140.67	mEq/L	5.07	mEq/L	8.13	mg/dL	109	mEq/L	127.67	mg/dL	NULL	NULL	10	mEq/L	7.29	units	50.82	mm Hg
15105235	59	F	WHITE	74.3667	170	Medicaid	English	NULL	TSICU	14.4	K/uL	4.1	m/uL	11.32	K/uL	0.8	K/uL	271.67	K/uL	11.9	g/dL	12.93	%	40.33	%	3.67	g/dL	NULL	NULL	NULL	NULL	145.5	mEq/L	4.95	mEq/L	8.95	mg/dL	97.5	mEq/L	136.75	mg/dL	NULL	NULL	11.75	mEq/L	7.41	units	69.2	mm Hg
15109142	91	F	UNABLE TO OBTAIN	82	NULL	Medicare	English	NULL	CCU	9.25	K/uL	4.27	m/uL	NULL	NULL	NULL	NULL	177	K/uL	12.7	g/dL	13.15	%	38.75	%	NULL	NULL	NULL	NULL	NULL	NULL	136.5	mEq/L	4.05	mEq/L	8.55	mg/dL	100.5	mEq/L	107	mg/dL	NULL	NULL	13.5	mEq/L	NULL	NULL	NULL	NULL
15110197	71	M	UNKNOWN	59.2	163	Medicare	English	NULL	Neuro SICU	10.1	K/uL	3.92	m/uL	8.15	K/uL	0.83	K/uL	134	K/uL	12.2	g/dL	13.8	%	35.8	%	2.5	g/dL	2.4	g/dL	4.9	g/dL	133.33	mEq/L	3.97	mEq/L	7.4	mg/dL	98	mEq/L	89.67	mg/dL	5.3	%	12.33	mEq/L	7.35	units	48	mm Hg
15111021	62	M	WHITE	63.7	NULL	Medicaid	English	SINGLE	MICU/SICU	8.23	K/uL	3.12	m/uL	NULL	NULL	NULL	NULL	298.67	K/uL	10	g/dL	13.83	%	29.43	%	4	g/dL	NULL	NULL	NULL	NULL	132.33	mEq/L	4.67	mEq/L	8.95	mg/dL	96.33	mEq/L	111.5	mg/dL	NULL	NULL	15	mEq/L	7.4	units	50	mm Hg
15113962	84	F	WHITE	67.6	NULL	Medicare	English	MARRIED	Neuro Intermediate	10.95	K/uL	2.8	m/uL	8.17	K/uL	2	K/uL	156.25	K/uL	7.35	g/dL	24.63	%	24.6	%	2.5	g/dL	NULL	NULL	NULL	NULL	138.33	mEq/L	3.67	mEq/L	8.13	mg/dL	102.67	mEq/L	97.33	mg/dL	NULL	NULL	9.67	mEq/L	7.44	units	41	mm Hg
15114531	74	F	WHITE	76.3	NULL	Medicare	English	SINGLE	Neuro SICU	4.2	K/uL	3.68	m/uL	NULL	NULL	NULL	NULL	196.5	K/uL	9.6	g/dL	15.75	%	30.65	%	NULL	NULL	NULL	NULL	NULL	NULL	138.5	mEq/L	4.35	mEq/L	8.25	mg/dL	102.5	mEq/L	117.5	mg/dL	5.4	%	8	mEq/L	NULL	NULL	NULL	NULL
15123201	87	M	WHITE	83.5	NULL	Medicare	English	MARRIED	Neuro Intermediate	10.45	K/uL	3.98	m/uL	NULL	NULL	NULL	NULL	202.5	K/uL	12.2	g/dL	14.55	%	37.3	%	NULL	NULL	NULL	NULL	NULL	NULL	144.67	mEq/L	4	mEq/L	9.23	mg/dL	107.67	mEq/L	122.67	mg/dL	NULL	NULL	14.33	mEq/L	NULL	NULL	NULL	NULL
15125662	83	M	WHITE	84.6	178	Medicare	English	MARRIED	CVICU	8.38	K/uL	3.13	m/uL	4.31	K/uL	0.92	K/uL	169.5	K/uL	9.53	g/dL	13.7	%	29.44	%	NULL	NULL	NULL	NULL	NULL	NULL	132.67	mEq/L	4.95	mEq/L	9.05	mg/dL	100.25	mEq/L	135.67	mg/dL	NULL	NULL	7.5	mEq/L	7.36	units	44.78	mm Hg
15125883	85	M	UNABLE TO OBTAIN	76	NULL	Medicare	Portuguese	NULL	MICU/SICU	23.3	K/uL	2.84	m/uL	11.19	K/uL	0.69	K/uL	276	K/uL	7.2	g/dL	21.32	%	24.84	%	3.5	g/dL	NULL	NULL	NULL	NULL	137	mEq/L	4.33	mEq/L	9.05	mg/dL	101.25	mEq/L	122.5	mg/dL	NULL	NULL	13.5	mEq/L	7.38	units	40	mm Hg
15126216	37	F	WHITE	68.4	163	Medicaid	English	MARRIED	CVICU	11.13	K/uL	2.39	m/uL	NULL	NULL	NULL	NULL	124.33	K/uL	8.9	g/dL	29.73	%	25.3	%	NULL	NULL	NULL	NULL	NULL	NULL	139.67	mEq/L	3.3	mEq/L	7	mg/dL	101.67	mEq/L	104.33	mg/dL	NULL	NULL	12.33	mEq/L	NULL	NULL	NULL	NULL
15134226	74	M	WHITE	123.6	178	Medicare	English	MARRIED	MICU/SICU	5.12	K/uL	2.2	m/uL	5.83	K/uL	0.23	K/uL	85.33	K/uL	7.37	g/dL	18.07	%	22.65	%	NULL	NULL	NULL	NULL	NULL	NULL	139	mEq/L	4.2	mEq/L	7.85	mg/dL	101	mEq/L	137.5	mg/dL	NULL	NULL	13	mEq/L	7.4	units	44	mm Hg
15135231	80	F	WHITE	51.95	163	Medicare	English	DIVORCED	CVICU	11.94	K/uL	2.74	m/uL	5.58	K/uL	1.34	K/uL	109.6	K/uL	8.92	g/dL	13.96	%	27.22	%	NULL	NULL	NULL	NULL	NULL	NULL	138	mEq/L	4.47	mEq/L	8.5	mg/dL	109	mEq/L	160.5	mg/dL	NULL	NULL	13.67	mEq/L	7.38	units	34.44	mm Hg
15141233	65	F	WHITE	105	NULL	Medicare	English	SINGLE	Neuro Intermediate	7	K/uL	3.86	m/uL	NULL	NULL	NULL	NULL	268	K/uL	11.5	g/dL	12.8	%	34.9	%	NULL	NULL	NULL	NULL	NULL	NULL	144	mEq/L	3.9	mEq/L	9.2	mg/dL	105	mEq/L	81	mg/dL	5	%	12	mEq/L	NULL	NULL	NULL	NULL
15143371	44	M	BLACK/AFRICAN AMERICAN	111.8	NULL	Medicaid	English	SINGLE	CVICU	4.45	K/uL	3.57	m/uL	NULL	NULL	NULL	NULL	165	K/uL	10.15	g/dL	14.15	%	31.75	%	NULL	NULL	NULL	NULL	NULL	NULL	142.67	mEq/L	4.83	mEq/L	7.07	mg/dL	108.33	mEq/L	97.33	mg/dL	NULL	NULL	12.33	mEq/L	NULL	NULL	NULL	NULL
15145186	84	M	OTHER	75	NULL	Medicare	English	DIVORCED	CCU	12.3	K/uL	2.74	m/uL	NULL	NULL	NULL	NULL	165.5	K/uL	7.7	g/dL	23.65	%	28.6	%	2.3	g/dL	NULL	NULL	NULL	NULL	145	mEq/L	6.2	mEq/L	8.9	mg/dL	110.5	mEq/L	15	mg/dL	NULL	NULL	24.5	mEq/L	7.08	units	38	mm Hg
15146455	90	M	WHITE	570	NULL	Medicare	English	MARRIED	Neuro Intermediate	10.9	K/uL	2.3	m/uL	NULL	NULL	NULL	NULL	192	K/uL	7.3	g/dL	14.4	%	23.1	%	NULL	NULL	NULL	NULL	NULL	NULL	139	mEq/L	4.3	mEq/L	NULL	NULL	105	mEq/L	64	mg/dL	NULL	NULL	14	mEq/L	NULL	NULL	NULL	NULL
15152519	65	F	BLACK/AFRICAN AMERICAN	100	NULL	Medicaid	English	SINGLE	CCU	12.6	K/uL	3.2	m/uL	NULL	NULL	NULL	NULL	264.5	K/uL	9.65	g/dL	14.35	%	29.6	%	3.5	g/dL	NULL	NULL	NULL	NULL	128.67	mEq/L	4	mEq/L	8.7	mg/dL	94.67	mEq/L	156	mg/dL	NULL	NULL	12.33	mEq/L	7.37	units	41	mm Hg
15154335	88	M	WHITE	82.2	165	Medicare	English	WIDOWED	MICU	7.55	K/uL	3.97	m/uL	6.48	K/uL	0.72	K/uL	149.5	K/uL	12.55	g/dL	12.25	%	38.1	%	NULL	NULL	NULL	NULL	NULL	NULL	137.5	mEq/L	4.05	mEq/L	9	mg/dL	98.5	mEq/L	125	mg/dL	NULL	NULL	10	mEq/L	7.36	units	59.75	mm Hg
15155071	86	M	WHITE	61.7	NULL	Medicare	English	WIDOWED	CCU	8.97	K/uL	2.63	m/uL	NULL	NULL	NULL	NULL	137.67	K/uL	8.73	g/dL	14.53	%	27.13	%	NULL	NULL	NULL	NULL	NULL	NULL	133	mEq/L	5.23	mEq/L	8.5	mg/dL	92	mEq/L	82.67	mg/dL	NULL	NULL	15.67	mEq/L	NULL	NULL	NULL	NULL
15155821	64	F	HISPANIC/LATINO - DOMINICAN	53.2	155	Medicaid	Spanish	SINGLE	CCU	11.4	K/uL	4.42	m/uL	10.21	K/uL	0.64	K/uL	412	K/uL	10.75	g/dL	22.4	%	34.95	%	NULL	NULL	NULL	NULL	NULL	NULL	130.67	mEq/L	3.9	mEq/L	9.07	mg/dL	86.33	mEq/L	118.33	mg/dL	NULL	NULL	19.67	mEq/L	7.47	units	41	mm Hg
15157279	58	F	WHITE	62	NULL	Medicare	English	MARRIED	MICU	4.95	K/uL	4.5	m/uL	NULL	NULL	NULL	NULL	192.5	K/uL	15.05	g/dL	11.1	%	40.3	%	4.8	g/dL	NULL	NULL	NULL	NULL	120	mEq/L	3.7	mEq/L	9.55	mg/dL	84	mEq/L	112	mg/dL	NULL	NULL	19.5	mEq/L	7.45	units	28	mm Hg
[truncated: 3,203 more rows]
[truncated: 198 more columns]
