# Supplementary material for: Construction and Validation of an Interpretable Machine Learning Model for Predicting Diabetes Risk in COPD Patients
Source: Research Square preprint supplement (doi:10.21203/rs.3.rs-7033945/v1), 2025-08-19
Supplement: Supplementary file 2 [file fe6b9d36e47cc8b8cacff580.xlsx]

## Sheet: 1851普通合并(1)
subject_id	hadm_id	age	gender	race	insurance	language	marital_status	labwbc	labwbc_uom	labrbc	labrbc_uom	labneutrophilcount	labneutrophilcount_uom	lablymphocytes	lablymphocytes_uom	labplateletcount	labplateletcount_uom	labhemoglobin	labhemoglobin_uom	labrdw	labrdw_uom	labhematocrit	labhematocrit_uom	labalbumin	labalbumin_uom	labglobulin	labglobulin_uom	labtotalprotein	labtotalprotein_uom	labsodium	labsodium_uom	labpotassium	labpotassium_uom	labcalciumtotal	labcalciumtotal_uom	labchloride	labchloride_uom	labglucose	labglucose_uom	laba1c	laba1c_uom	labaniongap	labaniongap_uom	labph	labph_uom	labpco2	labpco2_uom	labpo2	labpo2_uom
10008960	29069456	66	1	WHITE	Medicare	English	SINGLE	8	K/uL	4.42	m/uL	NULL	NULL	NULL	NULL	224	K/uL	11.8	g/dL	15.9	%	39.4	%	NULL	NULL	NULL	NULL	NULL	NULL	146	mEq/L	3.7	mEq/L	8.4	mg/dL	107	mEq/L	86	mg/dL	NULL	NULL	16	mEq/L	7.43	units	41	mm Hg	171	mm Hg
10014354	22741225	61	1	WHITE	Medicare	English	MARRIED	62.4	K/uL	3.12	m/uL	4.37	K/uL	57.41	K/uL	240	K/uL	8.5	g/dL	14.3	%	27.8	%	NULL	NULL	NULL	NULL	NULL	NULL	134	mEq/L	5	mEq/L	8.8	mg/dL	100	mEq/L	212	mg/dL	7.4	%	16	mEq/L	NULL	NULL	NULL	NULL	NULL	NULL
10015931	28157142	88	1	WHITE	Medicare	English	MARRIED	8	K/uL	3.82	m/uL	NULL	NULL	NULL	NULL	145	K/uL	12.7	g/dL	14.1	%	37.1	%	NULL	NULL	NULL	NULL	NULL	NULL	126	mEq/L	4.25	mEq/L	9	mg/dL	87.5	mEq/L	166	mg/dL	NULL	NULL	18	mEq/L	NULL	NULL	NULL	NULL	NULL	NULL
10020786	23488445	86	0	WHITE	Medicare	English	WIDOWED	31.2	K/uL	3.7	m/uL	28.11	K/uL	1.57	K/uL	192	K/uL	11.95	g/dL	13.85	%	35.95	%	2.7	g/dL	NULL	NULL	NULL	NULL	137.5	mEq/L	3.8	mEq/L	7.75	mg/dL	106	mEq/L	182	mg/dL	NULL	NULL	15	mEq/L	NULL	NULL	NULL	NULL	NULL	NULL
10024681	22182130	80	0	WHITE	Medicare	English	WIDOWED	15.45	K/uL	3.88	m/uL	NULL	NULL	NULL	NULL	277.5	K/uL	9.8	g/dL	15.45	%	31.15	%	NULL	NULL	NULL	NULL	NULL	NULL	134.5	mEq/L	3.55	mEq/L	8.15	mg/dL	96	mEq/L	151	mg/dL	NULL	NULL	12	mEq/L	NULL	NULL	NULL	NULL	NULL	NULL
10026754	25864142	58	0	WHITE	Medicaid	American Sign Language	SINGLE	NULL	NULL	NULL	NULL	NULL	NULL	NULL	NULL	NULL	NULL	NULL	NULL	NULL	NULL	NULL	NULL	NULL	NULL	NULL	NULL	NULL	NULL	NULL	NULL	NULL	NULL	NULL	NULL	NULL	NULL	NULL	NULL	5.7	%	NULL	NULL	NULL	NULL	NULL	NULL	NULL	NULL
10027650	27231531	71	1	ASIAN - SOUTH EAST ASIAN	Medicare	Vietnamese	SINGLE	11.1	K/uL	3.29	m/uL	NULL	NULL	NULL	NULL	230	K/uL	9.9	g/dL	12.1	%	29.8	%	NULL	NULL	NULL	NULL	NULL	NULL	132	mEq/L	4	mEq/L	8.1	mg/dL	99	mEq/L	142	mg/dL	NULL	NULL	10	mEq/L	NULL	NULL	NULL	NULL	NULL	NULL
10029291	22205327	50	0	WHITE	Medicare	English	DIVORCED	16.27	K/uL	4.02	m/uL	NULL	NULL	NULL	NULL	132	K/uL	12.33	g/dL	14.37	%	37.47	%	2.9	g/dL	NULL	NULL	NULL	NULL	148.2	mEq/L	4.06	mEq/L	7.4	mg/dL	113.6	mEq/L	222.5	mg/dL	NULL	NULL	20.5	mEq/L	7.33	units	30.56	mm Hg	219.56	mm Hg
10029429	22981727	91	0	WHITE	Medicare	English	WIDOWED	10.9	K/uL	3.24	m/uL	NULL	NULL	NULL	NULL	168	K/uL	9.2	g/dL	14.5	%	29.2	%	NULL	NULL	NULL	NULL	NULL	NULL	139	mEq/L	4.2	mEq/L	9.6	mg/dL	100	mEq/L	133	mg/dL	NULL	NULL	14	mEq/L	NULL	NULL	NULL	NULL	NULL	NULL
10032176	20464560	76	0	WHITE	Medicare	English	WIDOWED	5.6	K/uL	3.53	m/uL	NULL	NULL	NULL	NULL	155	K/uL	8.8	g/dL	16	%	26.5	%	3.8	g/dL	NULL	NULL	NULL	NULL	116	mEq/L	4.7	mEq/L	8.7	mg/dL	84	mEq/L	101	mg/dL	NULL	NULL	13	mEq/L	NULL	NULL	NULL	NULL	NULL	NULL
10034049	20693789	73	0	WHITE	Medicare	English	WIDOWED	4	K/uL	3.39	m/uL	NULL	NULL	NULL	NULL	165	K/uL	9.6	g/dL	14.2	%	28.5	%	NULL	NULL	NULL	NULL	NULL	NULL	140	mEq/L	3.1	mEq/L	8.9	mg/dL	99	mEq/L	191	mg/dL	NULL	NULL	16	mEq/L	NULL	NULL	NULL	NULL	NULL	NULL
10043568	22084197	79	0	WHITE	Medicare	English	NULL	16.9	K/uL	3.17	m/uL	13.33	K/uL	1.06	K/uL	328	K/uL	8.35	g/dL	19.3	%	28.7	%	3.2	g/dL	NULL	NULL	NULL	NULL	145	mEq/L	4.03	mEq/L	9.23	mg/dL	101.33	mEq/L	152	mg/dL	NULL	NULL	9.33	mEq/L	7.39	units	60.6	mm Hg	88.8	mm Hg
10049794	23455958	67	1	WHITE	Medicaid	English	SINGLE	8.3	K/uL	4.99	m/uL	NULL	NULL	NULL	NULL	220	K/uL	14.5	g/dL	13.2	%	48.2	%	NULL	NULL	NULL	NULL	NULL	NULL	134	mEq/L	4.7	mEq/L	9	mg/dL	94	mEq/L	159	mg/dL	NULL	NULL	11	mEq/L	7.33	units	62	mm Hg	161	mm Hg
10052938	25231169	62	0	OTHER	Medicaid	Other	MARRIED	5.5	K/uL	2.57	m/uL	4.79	K/uL	0.33	K/uL	89	K/uL	7.4	g/dL	15.7	%	23.6	%	NULL	NULL	NULL	NULL	NULL	NULL	140	mEq/L	3.5	mEq/L	8.2	mg/dL	110	mEq/L	137	mg/dL	NULL	NULL	8	mEq/L	7.31	units	46	mm Hg	27	mm Hg
10053005	23461227	65	1	BLACK/AFRICAN AMERICAN	Medicaid	English	MARRIED	6.3	K/uL	3.85	m/uL	3.85	K/uL	1.43	K/uL	255	K/uL	11.7	g/dL	14	%	35.2	%	NULL	NULL	NULL	NULL	NULL	NULL	135	mEq/L	4.8	mEq/L	9.2	mg/dL	101	mEq/L	135	mg/dL	7	%	11	mEq/L	NULL	NULL	NULL	NULL	NULL	NULL
10055595	29749985	58	0	WHITE	Medicare	English	SINGLE	10.1	K/uL	4.63	m/uL	7.13	K/uL	2.1	K/uL	153.5	K/uL	14.4	g/dL	13.55	%	45.65	%	NULL	NULL	NULL	NULL	NULL	NULL	137	mEq/L	4.9	mEq/L	10.05	mg/dL	107.5	mEq/L	179.5	mg/dL	NULL	NULL	10.5	mEq/L	NULL	NULL	NULL	NULL	NULL	NULL
10060179	20250077	96	0	WHITE	Medicare	English	WIDOWED	6.95	K/uL	4.39	m/uL	4.64	K/uL	0.78	K/uL	291	K/uL	12.15	g/dL	14.75	%	37.1	%	NULL	NULL	NULL	NULL	NULL	NULL	136	mEq/L	3.65	mEq/L	9.7	mg/dL	104	mEq/L	103	mg/dL	NULL	NULL	7	mEq/L	NULL	NULL	NULL	NULL	NULL	NULL
10060338	25267336	59	1	WHITE	Medicare	English	MARRIED	7.9	K/uL	5.04	m/uL	4.37	K/uL	2.56	K/uL	217	K/uL	15.8	g/dL	13.7	%	47	%	4.3	g/dL	NULL	NULL	NULL	NULL	140	mEq/L	4.3	mEq/L	8.8	mg/dL	101	mEq/L	113	mg/dL	NULL	NULL	14	mEq/L	NULL	NULL	NULL	NULL	NULL	NULL
10066193	24802410	71	1	WHITE	Medicare	English	SINGLE	7.2	K/uL	4.3	m/uL	NULL	NULL	NULL	NULL	232	K/uL	12.8	g/dL	13.7	%	38.7	%	3.8	g/dL	NULL	NULL	NULL	NULL	140	mEq/L	4	mEq/L	NULL	NULL	103	mEq/L	176	mg/dL	6.7	%	10	mEq/L	NULL	NULL	NULL	NULL	NULL	NULL
10069992	28478673	58	0	WHITE	Private	English	MARRIED	11.3	K/uL	2.81	m/uL	10.74	K/uL	0.83	K/uL	56	K/uL	9.05	g/dL	13.25	%	26.45	%	3.2	g/dL	NULL	NULL	NULL	NULL	131.33	mEq/L	4.33	mEq/L	7.73	mg/dL	101.67	mEq/L	153.33	mg/dL	NULL	NULL	19	mEq/L	7.31	units	34.25	mm Hg	34.75	mm Hg
10070201	29368106	75	1	WHITE	Medicare	English	SINGLE	9.3	K/uL	4.91	m/uL	NULL	NULL	NULL	NULL	221	K/uL	15.1	g/dL	13.7	%	45.1	%	4.1	g/dL	NULL	NULL	NULL	NULL	138	mEq/L	3.7	mEq/L	NULL	NULL	98	mEq/L	209	mg/dL	7.5	%	14	mEq/L	NULL	NULL	NULL	NULL	NULL	NULL
10075814	22163531	64	0	OTHER	Medicaid	English	DIVORCED	NULL	NULL	NULL	NULL	NULL	NULL	NULL	NULL	NULL	NULL	NULL	NULL	NULL	NULL	NULL	NULL	NULL	NULL	NULL	NULL	NULL	NULL	NULL	NULL	NULL	NULL	NULL	NULL	NULL	NULL	NULL	NULL	NULL	NULL	NULL	NULL	NULL	NULL	NULL	NULL	NULL	NULL
10081670	29620670	77	1	WHITE	Medicare	English	MARRIED	6.5	K/uL	5.11	m/uL	NULL	NULL	NULL	NULL	179	K/uL	14.9	g/dL	13.5	%	45.1	%	NULL	NULL	NULL	NULL	NULL	NULL	139	mEq/L	4.3	mEq/L	9.6	mg/dL	101	mEq/L	181	mg/dL	NULL	NULL	16	mEq/L	NULL	NULL	NULL	NULL	NULL	NULL
10086011	28087417	74	0	BLACK/AFRICAN AMERICAN	Medicare	English	WIDOWED	NULL	NULL	NULL	NULL	NULL	NULL	NULL	NULL	NULL	NULL	NULL	NULL	NULL	NULL	NULL	NULL	NULL	NULL	NULL	NULL	NULL	NULL	NULL	NULL	NULL	NULL	NULL	NULL	NULL	NULL	NULL	NULL	NULL	NULL	NULL	NULL	NULL	NULL	NULL	NULL	NULL	NULL
10095681	23380001	91	0	WHITE	Medicare	Russian	WIDOWED	8.7	K/uL	3.76	m/uL	6.34	K/uL	1.3	K/uL	351	K/uL	11.3	g/dL	14	%	34	%	NULL	NULL	NULL	NULL	NULL	NULL	131	mEq/L	4	mEq/L	8.7	mg/dL	96	mEq/L	83	mg/dL	NULL	NULL	17	mEq/L	NULL	NULL	NULL	NULL	NULL	NULL
10096175	21035896	76	0	WHITE	Medicare	English	SINGLE	NULL	NULL	NULL	NULL	NULL	NULL	NULL	NULL	NULL	NULL	NULL	NULL	NULL	NULL	NULL	NULL	NULL	NULL	NULL	NULL	NULL	NULL	NULL	NULL	NULL	NULL	NULL	NULL	NULL	NULL	NULL	NULL	NULL	NULL	NULL	NULL	NULL	NULL	NULL	NULL	NULL	NULL
10104730	23949226	70	0	WHITE	Medicare	English	SINGLE	9	K/uL	4.22	m/uL	NULL	NULL	NULL	NULL	240.5	K/uL	12.35	g/dL	14.35	%	37.05	%	4.1	g/dL	NULL	NULL	NULL	NULL	135.5	mEq/L	3.65	mEq/L	9.8	mg/dL	98	mEq/L	164.5	mg/dL	8.1	%	16	mEq/L	NULL	NULL	NULL	NULL	NULL	NULL
10106244	26713233	63	0	WHITE	Private	English	SINGLE	20	K/uL	4.19	m/uL	18.34	K/uL	1.08	K/uL	254.67	K/uL	12.7	g/dL	13.2	%	38.3	%	NULL	NULL	NULL	NULL	NULL	NULL	137.33	mEq/L	4.2	mEq/L	8.85	mg/dL	101	mEq/L	298.5	mg/dL	NULL	NULL	17.5	mEq/L	NULL	NULL	NULL	NULL	NULL	NULL
10107044	23392841	57	0	WHITE	Medicare	English	SINGLE	4.6	K/uL	3.65	m/uL	4.65	K/uL	0.2	K/uL	34.33	K/uL	11.77	g/dL	15.3	%	36.47	%	2.1	g/dL	NULL	NULL	NULL	NULL	146.2	mEq/L	4.37	mEq/L	7.43	mg/dL	107	mEq/L	182	mg/dL	NULL	NULL	5.67	mEq/L	7.43	units	54	mm Hg	65.67	mm Hg
10118142	29824685	83	0	WHITE	Medicare	English	WIDOWED	8.2	K/uL	3.19	m/uL	NULL	NULL	NULL	NULL	163	K/uL	9.8	g/dL	13	%	34.3	%	NULL	NULL	NULL	NULL	NULL	NULL	141.33	mEq/L	4.97	mEq/L	NULL	NULL	103	mEq/L	103	mg/dL	NULL	NULL	10	mEq/L	NULL	NULL	NULL	NULL	NULL	NULL
10121207	28762036	65	1	HISPANIC/LATINO - DOMINICAN	Medicare	Spanish	SINGLE	10.4	K/uL	4.48	m/uL	NULL	NULL	NULL	NULL	284	K/uL	14	g/dL	12.7	%	39.9	%	NULL	NULL	NULL	NULL	NULL	NULL	134	mEq/L	3.5	mEq/L	8.6	mg/dL	97	mEq/L	157	mg/dL	NULL	NULL	14	mEq/L	NULL	NULL	NULL	NULL	NULL	NULL
10130520	23658176	70	1	WHITE	Medicare	English	SINGLE	9.8	K/uL	3.91	m/uL	NULL	NULL	NULL	NULL	254	K/uL	11.7	g/dL	13.3	%	35.7	%	NULL	NULL	NULL	NULL	NULL	NULL	142	mEq/L	4.2	mEq/L	8.7	mg/dL	104	mEq/L	90	mg/dL	NULL	NULL	12	mEq/L	NULL	NULL	NULL	NULL	NULL	NULL
10131601	22592989	77	1	WHITE	Medicare	English	SINGLE	7.5	K/uL	2.02	m/uL	NULL	NULL	NULL	NULL	NULL	K/uL	6.6	g/dL	19.45	%	20.95	%	NULL	NULL	NULL	NULL	NULL	NULL	NULL	NULL	NULL	NULL	NULL	NULL	NULL	NULL	NULL	NULL	NULL	NULL	NULL	NULL	NULL	NULL	NULL	NULL	NULL	NULL
10134742	22748673	68	1	WHITE	Medicare	English	MARRIED	7.4	K/uL	4.16	m/uL	NULL	NULL	NULL	NULL	182	K/uL	12.2	g/dL	14.4	%	38.1	%	NULL	NULL	NULL	NULL	NULL	NULL	142	mEq/L	5.2	mEq/L	8.7	mg/dL	104	mEq/L	113	mg/dL	NULL	NULL	14	mEq/L	NULL	NULL	NULL	NULL	NULL	NULL
10135376	24984050	92	1	WHITE	Medicare	English	MARRIED	7.4	K/uL	3.81	m/uL	NULL	NULL	NULL	NULL	243	K/uL	7.85	g/dL	20.7	%	26.35	%	NULL	NULL	NULL	NULL	NULL	NULL	135	mEq/L	3.43	mEq/L	9.1	mg/dL	96.75	mEq/L	185.25	mg/dL	NULL	NULL	20.25	mEq/L	NULL	NULL	NULL	NULL	NULL	NULL
10138206	29096936	54	1	WHITE	Private	English	SINGLE	3.75	K/uL	2.69	m/uL	NULL	NULL	NULL	NULL	101	K/uL	8.1	g/dL	24.1	%	26.5	%	NULL	NULL	NULL	NULL	NULL	NULL	135.67	mEq/L	5	mEq/L	9.37	mg/dL	102.33	mEq/L	170.33	mg/dL	NULL	NULL	16	mEq/L	NULL	NULL	NULL	NULL	NULL	NULL
10142880	22372301	76	1	UNKNOWN	Other	English	MARRIED	10	K/uL	3.77	m/uL	7.42	K/uL	0.59	K/uL	208	K/uL	12.15	g/dL	14.5	%	37.15	%	3.7	g/dL	NULL	NULL	NULL	NULL	135.67	mEq/L	4.83	mEq/L	8.73	mg/dL	101.33	mEq/L	264	mg/dL	NULL	NULL	10	mEq/L	7.35	units	48	mm Hg	42	mm Hg
10157454	25401199	63	1	WHITE	Medicare	English	WIDOWED	6.7	K/uL	3.17	m/uL	NULL	NULL	NULL	NULL	201	K/uL	9.6	g/dL	14.4	%	30.2	%	NULL	NULL	NULL	NULL	NULL	NULL	NULL	NULL	NULL	NULL	NULL	NULL	NULL	NULL	NULL	NULL	NULL	NULL	NULL	NULL	NULL	NULL	NULL	NULL	NULL	NULL
10163174	22485861	74	1	WHITE	Medicare	Portuguese	MARRIED	15.5	K/uL	3.49	m/uL	NULL	NULL	NULL	NULL	315	K/uL	11.5	g/dL	16.6	%	34	%	NULL	NULL	NULL	NULL	NULL	NULL	136	mEq/L	4.9	mEq/L	8.6	mg/dL	95.5	mEq/L	110	mg/dL	NULL	NULL	16	mEq/L	NULL	NULL	NULL	NULL	NULL	NULL
10169206	20731730	60	0	WHITE	Medicare	English	MARRIED	13.33	K/uL	3.18	m/uL	12.88	K/uL	0.41	K/uL	256	K/uL	8.93	g/dL	21.53	%	26.87	%	NULL	NULL	NULL	NULL	NULL	NULL	119	mEq/L	3.68	mEq/L	8.18	mg/dL	89	mEq/L	81	mg/dL	NULL	NULL	16	mEq/L	NULL	NULL	NULL	NULL	NULL	NULL
10175718	20892331	78	1	WHITE	Medicare	English	MARRIED	NULL	NULL	NULL	NULL	NULL	NULL	NULL	NULL	NULL	NULL	NULL	NULL	NULL	NULL	NULL	NULL	3.9	g/dL	NULL	NULL	NULL	NULL	NULL	NULL	3.55	mEq/L	8.4	mg/dL	NULL	NULL	NULL	NULL	NULL	NULL	NULL	NULL	NULL	NULL	NULL	NULL	NULL	NULL
10177209	29238400	70	1	WHITE	Medicare	English	DIVORCED	14.7	K/uL	4.08	m/uL	NULL	NULL	NULL	NULL	493	K/uL	10.3	g/dL	19.4	%	31.7	%	NULL	NULL	NULL	NULL	NULL	NULL	135	mEq/L	4.5	mEq/L	9	mg/dL	98	mEq/L	108	mg/dL	NULL	NULL	19	mEq/L	7.47	units	NULL	NULL	NULL	NULL
10180095	24199963	74	0	WHITE	Medicare	English	DIVORCED	7.5	K/uL	3.87	m/uL	NULL	NULL	NULL	NULL	331	K/uL	9.5	g/dL	14.3	%	31.1	%	NULL	NULL	NULL	NULL	NULL	NULL	142	mEq/L	4.2	mEq/L	NULL	NULL	103	mEq/L	133	mg/dL	NULL	NULL	14	mEq/L	7.4	units	40.67	mm Hg	272.67	mm Hg
10183043	20202094	53	1	WHITE	Medicaid	English	MARRIED	7.3	K/uL	4.47	m/uL	6.33	K/uL	0.68	K/uL	143	K/uL	12.2	g/dL	19.9	%	37.9	%	NULL	NULL	NULL	NULL	NULL	NULL	139	mEq/L	4.3	mEq/L	8.6	mg/dL	105	mEq/L	224	mg/dL	NULL	NULL	13	mEq/L	NULL	NULL	NULL	NULL	NULL	NULL
10183410	29689423	58	1	WHITE - OTHER EUROPEAN	Medicare	English	MARRIED	15.3	K/uL	4.21	m/uL	NULL	NULL	NULL	NULL	231	K/uL	13.9	g/dL	12.9	%	40.4	%	NULL	NULL	NULL	NULL	NULL	NULL	137	mEq/L	4.9	mEq/L	8	mg/dL	102	mEq/L	150	mg/dL	NULL	NULL	15	mEq/L	7.29	units	51.75	mm Hg	188.5	mm Hg
10184003	24418769	68	0	BLACK/AFRICAN AMERICAN	Private	English	MARRIED	5.2	K/uL	4.25	m/uL	NULL	NULL	NULL	NULL	292	K/uL	11.5	g/dL	13.7	%	32.3	%	3.6	g/dL	2.7	g/dL	6.3	g/dL	119.25	mEq/L	4.53	mEq/L	8.9	mg/dL	84.5	mEq/L	194	mg/dL	NULL	NULL	12.75	mEq/L	NULL	NULL	NULL	NULL	NULL	NULL
10193846	26468757	75	0	WHITE	Medicare	English	DIVORCED	NULL	NULL	NULL	NULL	NULL	NULL	NULL	NULL	NULL	NULL	NULL	NULL	NULL	NULL	NULL	NULL	NULL	NULL	NULL	NULL	NULL	NULL	138	mEq/L	4.2	mEq/L	8.7	mg/dL	105	mEq/L	99	mg/dL	NULL	NULL	8	mEq/L	NULL	NULL	NULL	NULL	NULL	NULL
10196264	28708976	52	0	HISPANIC/LATINO - PUERTO RICAN	Medicaid	English	SINGLE	NULL	NULL	NULL	NULL	NULL	NULL	NULL	NULL	NULL	NULL	NULL	NULL	NULL	NULL	NULL	NULL	NULL	NULL	NULL	NULL	NULL	NULL	NULL	NULL	NULL	NULL	NULL	NULL	NULL	NULL	NULL	NULL	NULL	NULL	NULL	NULL	NULL	NULL	NULL	NULL	NULL	NULL
10217362	24849963	56	0	UNKNOWN	Medicare	English	NULL	15.5	K/uL	4.48	m/uL	10.89	K/uL	3.54	K/uL	275	K/uL	13.8	g/dL	13.55	%	41.15	%	NULL	NULL	NULL	NULL	NULL	NULL	139	mEq/L	3.95	mEq/L	9.15	mg/dL	99.5	mEq/L	139.5	mg/dL	NULL	NULL	15	mEq/L	NULL	NULL	NULL	NULL	NULL	NULL
10219556	24705244	85	0	WHITE	Medicare	English	DIVORCED	6	K/uL	4.72	m/uL	NULL	NULL	NULL	NULL	290	K/uL	12.1	g/dL	14.1	%	39.7	%	3.9	g/dL	NULL	NULL	NULL	NULL	140	mEq/L	3.1	mEq/L	8.8	mg/dL	104	mEq/L	189	mg/dL	NULL	NULL	13	mEq/L	NULL	NULL	NULL	NULL	NULL	NULL
10220448	24615466	86	1	OTHER	Medicare	Kabuverdianu	SINGLE	2.9	K/uL	3.96	m/uL	NULL	NULL	NULL	NULL	181	K/uL	11.3	g/dL	13	%	35.7	%	NULL	NULL	NULL	NULL	NULL	NULL	134	mEq/L	4.9	mEq/L	9.3	mg/dL	94	mEq/L	133	mg/dL	NULL	NULL	17	mEq/L	NULL	NULL	NULL	NULL	NULL	NULL
10223117	21095148	56	1	UNKNOWN	Medicare	English	MARRIED	14.6	K/uL	3.56	m/uL	15.06	K/uL	0.7	K/uL	337.67	K/uL	11.17	g/dL	13.53	%	33.63	%	NULL	NULL	NULL	NULL	NULL	NULL	133.67	mEq/L	4.1	mEq/L	8.3	mg/dL	96	mEq/L	207	mg/dL	NULL	NULL	19.33	mEq/L	7.34	units	46.5	mm Hg	119	mm Hg
10228423	26753787	55	0	WHITE	Medicare	English	DIVORCED	10	K/uL	4.03	m/uL	7.13	K/uL	1.68	K/uL	488	K/uL	11.3	g/dL	15.2	%	36.7	%	3.7	g/dL	NULL	NULL	NULL	NULL	138	mEq/L	4.1	mEq/L	9.5	mg/dL	102	mEq/L	132	mg/dL	NULL	NULL	11	mEq/L	NULL	NULL	NULL	NULL	NULL	NULL
10239527	22750133	83	1	WHITE - OTHER EUROPEAN	Medicare	English	WIDOWED	6.9	K/uL	3.14	m/uL	NULL	NULL	NULL	NULL	252	K/uL	10.1	g/dL	11.5	%	30.3	%	3.9	g/dL	NULL	NULL	NULL	NULL	136	mEq/L	4.15	mEq/L	8.6	mg/dL	100	mEq/L	259	mg/dL	NULL	NULL	15	mEq/L	NULL	NULL	NULL	NULL	NULL	NULL
10240707	29602389	73	1	BLACK/CARIBBEAN ISLAND	Medicare	English	MARRIED	14.63	K/uL	2.9	m/uL	NULL	NULL	NULL	NULL	155.33	K/uL	9.5	g/dL	15.87	%	28.6	%	NULL	NULL	NULL	NULL	NULL	NULL	140	mEq/L	4.3	mEq/L	8.25	mg/dL	111	mEq/L	121	mg/dL	NULL	NULL	16	mEq/L	NULL	NULL	NULL	NULL	NULL	NULL
10257550	20105129	62	0	UNKNOWN	Private	English	WIDOWED	20.95	K/uL	4.36	m/uL	16.91	K/uL	0.91	K/uL	208	K/uL	11.25	g/dL	15.45	%	36.6	%	NULL	NULL	NULL	NULL	NULL	NULL	135.75	mEq/L	5.18	mEq/L	8.53	mg/dL	103.75	mEq/L	230.75	mg/dL	NULL	NULL	18	mEq/L	7.28	units	42.25	mm Hg	120	mm Hg
10257669	25996618	78	0	WHITE	Medicare	English	DIVORCED	8.7	K/uL	3.75	m/uL	NULL	NULL	NULL	NULL	247	K/uL	11.1	g/dL	13.1	%	36	%	NULL	NULL	NULL	NULL	NULL	NULL	140	mEq/L	4.95	mEq/L	9.7	mg/dL	102	mEq/L	130	mg/dL	NULL	NULL	11	mEq/L	NULL	NULL	NULL	NULL	NULL	NULL
10262728	23315044	64	0	WHITE	Medicare	English	SINGLE	11.35	K/uL	5	m/uL	7.63	K/uL	1.37	K/uL	152	K/uL	15.45	g/dL	13.45	%	45.9	%	NULL	NULL	NULL	NULL	NULL	NULL	141.5	mEq/L	4.25	mEq/L	9.15	mg/dL	100.5	mEq/L	169.5	mg/dL	7	%	15.5	mEq/L	NULL	NULL	NULL	NULL	NULL	NULL
10266130	22931388	79	0	WHITE	Medicare	English	MARRIED	8.4	K/uL	3.29	m/uL	6.69	K/uL	0.96	K/uL	183	K/uL	10.3	g/dL	14.3	%	32.8	%	3.9	g/dL	NULL	NULL	NULL	NULL	143	mEq/L	4.5	mEq/L	NULL	NULL	98	mEq/L	130	mg/dL	NULL	NULL	14	mEq/L	NULL	NULL	NULL	NULL	NULL	NULL
10268404	21089404	47	1	WHITE	Medicare	English	NULL	6.6	K/uL	2.63	m/uL	NULL	NULL	NULL	NULL	135	K/uL	9.2	g/dL	12.2	%	28.3	%	3.8	g/dL	NULL	NULL	NULL	NULL	138.5	mEq/L	5.3	mEq/L	8.85	mg/dL	97	mEq/L	193.5	mg/dL	7.9	%	20.5	mEq/L	NULL	NULL	NULL	NULL	NULL	NULL
10269658	27621490	73	1	WHITE	Medicare	English	MARRIED	5.93	K/uL	2.47	m/uL	NULL	NULL	NULL	NULL	90	K/uL	7.6	g/dL	19.1	%	24.73	%	3.1	g/dL	NULL	NULL	NULL	NULL	134.5	mEq/L	4.85	mEq/L	7.45	mg/dL	99	mEq/L	237.5	mg/dL	NULL	NULL	12	mEq/L	7.37	units	42	mm Hg	81	mm Hg
10272425	21243406	68	1	UNKNOWN	Medicare	English	MARRIED	7.9	K/uL	5.61	m/uL	NULL	NULL	NULL	NULL	237	K/uL	14.3	g/dL	15.6	%	47.1	%	4.2	g/dL	NULL	NULL	NULL	NULL	139	mEq/L	4.3	mEq/L	8.9	mg/dL	99	mEq/L	127	mg/dL	NULL	NULL	17	mEq/L	NULL	NULL	NULL	NULL	NULL	NULL
10275937	25098954	79	1	BLACK/AFRICAN AMERICAN	Medicare	English	MARRIED	15.15	K/uL	2.82	m/uL	NULL	NULL	NULL	NULL	200	K/uL	8.18	g/dL	15.53	%	25.33	%	NULL	NULL	NULL	NULL	NULL	NULL	138	mEq/L	4.65	mEq/L	8.55	mg/dL	104.5	mEq/L	144	mg/dL	5.6	%	17.5	mEq/L	NULL	NULL	NULL	NULL	NULL	NULL
10294001	25281707	66	0	HISPANIC/LATINO - PUERTO RICAN	Medicaid	Spanish	SINGLE	NULL	NULL	NULL	NULL	NULL	NULL	NULL	NULL	NULL	NULL	NULL	NULL	NULL	NULL	NULL	NULL	NULL	NULL	NULL	NULL	NULL	NULL	139	mEq/L	4.1	mEq/L	6.6	mg/dL	99	mEq/L	214	mg/dL	NULL	NULL	17	mEq/L	NULL	NULL	NULL	NULL	NULL	NULL
10295273	21852644	65	1	WHITE	Medicare	English	MARRIED	6.2	K/uL	4.32	m/uL	NULL	NULL	NULL	NULL	193	K/uL	13.1	g/dL	12.6	%	38.9	%	3.8	g/dL	NULL	NULL	NULL	NULL	141	mEq/L	4.4	mEq/L	NULL	NULL	104	mEq/L	115	mg/dL	6.2	%	20	mEq/L	NULL	NULL	NULL	NULL	NULL	NULL
10301122	25477286	76	1	WHITE	Private	English	MARRIED	6.3	K/uL	3.22	m/uL	NULL	NULL	NULL	NULL	253	K/uL	8.5	g/dL	18.1	%	26.8	%	NULL	NULL	NULL	NULL	NULL	NULL	138	mEq/L	4.3	mEq/L	8.7	mg/dL	104	mEq/L	90	mg/dL	NULL	NULL	12	mEq/L	NULL	NULL	NULL	NULL	NULL	NULL
10305617	20371111	70	0	WHITE - OTHER EUROPEAN	Medicaid	English	WIDOWED	NULL	NULL	NULL	NULL	NULL	NULL	NULL	NULL	NULL	NULL	NULL	NULL	NULL	NULL	NULL	NULL	NULL	NULL	NULL	NULL	NULL	NULL	NULL	NULL	NULL	NULL	NULL	NULL	NULL	NULL	NULL	NULL	NULL	NULL	NULL	NULL	NULL	NULL	NULL	NULL	NULL	NULL
10306162	28867120	89	1	PATIENT DECLINED TO ANSWER	Medicare	English	WIDOWED	7.95	K/uL	3.07	m/uL	NULL	NULL	NULL	NULL	141.5	K/uL	8.25	g/dL	14.8	%	26.05	%	NULL	NULL	NULL	NULL	NULL	NULL	138	mEq/L	4.1	mEq/L	8.5	mg/dL	104	mEq/L	143	mg/dL	NULL	NULL	20	mEq/L	7.37	units	37.5	mm Hg	210.5	mm Hg
10308232	25550848	72	0	WHITE	Medicare	English	DIVORCED	9	K/uL	4.51	m/uL	4.78	K/uL	2.61	K/uL	164	K/uL	13.95	g/dL	12.85	%	40.8	%	NULL	NULL	NULL	NULL	NULL	NULL	129	mEq/L	3.8	mEq/L	9.2	mg/dL	94	mEq/L	94	mg/dL	NULL	NULL	13.5	mEq/L	NULL	NULL	NULL	NULL	NULL	NULL
10309415	25417931	88	1	WHITE	Medicare	English	MARRIED	10.5	K/uL	3.9	m/uL	NULL	NULL	NULL	NULL	143.5	K/uL	11.5	g/dL	13.55	%	35.55	%	NULL	NULL	NULL	NULL	NULL	NULL	141	mEq/L	4	mEq/L	8.7	mg/dL	105	mEq/L	181	mg/dL	NULL	NULL	16	mEq/L	NULL	NULL	NULL	NULL	NULL	NULL
10313200	22869441	70	0	WHITE - OTHER EUROPEAN	Medicaid	English	DIVORCED	18.13	K/uL	2.99	m/uL	16.3	K/uL	0.53	K/uL	59.67	K/uL	8.65	g/dL	17.17	%	26.98	%	3.25	g/dL	NULL	NULL	NULL	NULL	144	mEq/L	4.2	mEq/L	8.1	mg/dL	112.5	mEq/L	224	mg/dL	NULL	NULL	17.5	mEq/L	NULL	NULL	NULL	NULL	NULL	NULL
10313706	23372643	76	0	WHITE	Medicare	English	MARRIED	11.6	K/uL	2.56	m/uL	NULL	NULL	NULL	NULL	411	K/uL	7.25	g/dL	17.7	%	22.35	%	NULL	NULL	NULL	NULL	NULL	NULL	134	mEq/L	4.1	mEq/L	9.4	mg/dL	91	mEq/L	174	mg/dL	NULL	NULL	17	mEq/L	7.46	units	35	mm Hg	174	mm Hg
10314833	20839530	62	1	BLACK/AFRICAN AMERICAN	Medicare	English	MARRIED	9.6	K/uL	4.2	m/uL	NULL	NULL	NULL	NULL	219	K/uL	12.3	g/dL	13.8	%	39.9	%	NULL	NULL	NULL	NULL	NULL	NULL	142	mEq/L	4.6	mEq/L	8.8	mg/dL	101	mEq/L	106	mg/dL	5.8	%	7	mEq/L	7.34	units	68.67	mm Hg	95.67	mm Hg
10316172	20633807	84	0	WHITE	Medicare	English	NULL	14.8	K/uL	3.18	m/uL	NULL	NULL	NULL	NULL	244	K/uL	9.77	g/dL	12.83	%	30	%	2	g/dL	NULL	NULL	NULL	NULL	125	mEq/L	5.63	mEq/L	8.37	mg/dL	88.67	mEq/L	211	mg/dL	NULL	NULL	22.33	mEq/L	7.22	units	51.6	mm Hg	91.6	mm Hg
10321613	29807103	75	1	WHITE	Medicare	English	MARRIED	8.07	K/uL	2.67	m/uL	NULL	NULL	NULL	NULL	191.67	K/uL	8.17	g/dL	16.63	%	27.07	%	3.2	g/dL	NULL	NULL	NULL	NULL	136.67	mEq/L	4.9	mEq/L	8.3	mg/dL	96.67	mEq/L	193.67	mg/dL	NULL	NULL	18.67	mEq/L	7.39	units	51	mm Hg	65.75	mm Hg
10327918	28233125	69	1	WHITE - OTHER EUROPEAN	Private	English	MARRIED	4.35	K/uL	3.32	m/uL	NULL	NULL	NULL	NULL	141	K/uL	7.05	g/dL	20.35	%	23.8	%	2.9	g/dL	NULL	NULL	NULL	NULL	139	mEq/L	4.3	mEq/L	8.7	mg/dL	105	mEq/L	87	mg/dL	NULL	NULL	10	mEq/L	NULL	NULL	NULL	NULL	NULL	NULL
10332798	29153797	77	1	BLACK/AFRICAN AMERICAN	Medicaid	English	SINGLE	5.9	K/uL	3.39	m/uL	NULL	NULL	NULL	NULL	281	K/uL	8.7	g/dL	16.4	%	29.2	%	4.1	g/dL	NULL	NULL	NULL	NULL	140	mEq/L	4.55	mEq/L	9.25	mg/dL	104	mEq/L	187	mg/dL	8.2	%	13	mEq/L	NULL	NULL	NULL	NULL	NULL	NULL
10341452	28644866	79	0	WHITE	Medicare	English	SINGLE	15.4	K/uL	3.84	m/uL	NULL	NULL	NULL	NULL	229	K/uL	10.8	g/dL	13.5	%	33.65	%	NULL	NULL	NULL	NULL	NULL	NULL	134	mEq/L	4.3	mEq/L	8.1	mg/dL	95	mEq/L	227	mg/dL	NULL	NULL	12	mEq/L	NULL	NULL	NULL	NULL	NULL	NULL
10353722	28024488	66	1	WHITE	Medicaid	English	MARRIED	5.2	K/uL	4.62	m/uL	NULL	NULL	NULL	NULL	222	K/uL	8.8	g/dL	15.9	%	27.95	%	NULL	NULL	NULL	NULL	NULL	NULL	NULL	NULL	5.1	mEq/L	NULL	NULL	NULL	NULL	NULL	NULL	NULL	NULL	NULL	NULL	NULL	NULL	NULL	NULL	NULL	NULL
10355595	24394487	78	1	WHITE	Medicare	English	SINGLE	6	K/uL	2.51	m/uL	NULL	NULL	NULL	NULL	160	K/uL	7.4	g/dL	18	%	24.6	%	NULL	NULL	NULL	NULL	NULL	NULL	143	mEq/L	5.6	mEq/L	9.1	mg/dL	112	mEq/L	145	mg/dL	NULL	NULL	16	mEq/L	NULL	NULL	NULL	NULL	NULL	NULL
10356403	27356489	76	1	BLACK/AFRICAN AMERICAN	Medicare	English	MARRIED	9.8	K/uL	4.92	m/uL	NULL	NULL	NULL	NULL	276	K/uL	14.8	g/dL	13.2	%	44.7	%	NULL	NULL	NULL	NULL	NULL	NULL	147	mEq/L	3.8	mEq/L	9	mg/dL	110	mEq/L	135	mg/dL	5.9	%	15	mEq/L	NULL	NULL	NULL	NULL	NULL	NULL
10357783	24705440	91	0	WHITE	Medicare	English	WIDOWED	4.93	K/uL	2.82	m/uL	1.94	K/uL	1.79	K/uL	63	K/uL	8.07	g/dL	15.17	%	24.93	%	NULL	NULL	NULL	NULL	NULL	NULL	136	mEq/L	4.2	mEq/L	8.7	mg/dL	102	mEq/L	128	mg/dL	NULL	NULL	10	mEq/L	NULL	NULL	NULL	NULL	NULL	NULL
10370092	26530002	71	0	UNKNOWN	Medicare	English	MARRIED	15.4	K/uL	2.71	m/uL	8.74	K/uL	3.88	K/uL	664	K/uL	7.65	g/dL	19.1	%	24.65	%	1.8	g/dL	NULL	NULL	NULL	NULL	133.5	mEq/L	3.9	mEq/L	7.45	mg/dL	103.5	mEq/L	248	mg/dL	NULL	NULL	11	mEq/L	NULL	NULL	NULL	NULL	NULL	NULL
10386005	21598829	59	0	WHITE	Private	English	NULL	4.7	K/uL	2.7	m/uL	3.43	K/uL	0.65	K/uL	150	K/uL	7.5	g/dL	18.5	%	25.5	%	3.4	g/dL	NULL	NULL	NULL	NULL	141	mEq/L	5.73	mEq/L	8.1	mg/dL	100.33	mEq/L	187.33	mg/dL	NULL	NULL	8.67	mEq/L	NULL	NULL	NULL	NULL	NULL	NULL
10397264	24242797	84	0	WHITE - RUSSIAN	Medicare	Russian	WIDOWED	5.6	K/uL	4.5	m/uL	NULL	NULL	NULL	NULL	226	K/uL	12.7	g/dL	14.3	%	38.5	%	NULL	NULL	NULL	NULL	NULL	NULL	139	mEq/L	3.5	mEq/L	9.6	mg/dL	104	mEq/L	145	mg/dL	NULL	NULL	18	mEq/L	NULL	NULL	NULL	NULL	NULL	NULL
10411160	29279148	62	1	WHITE	Medicare	English	SINGLE	5.25	K/uL	2.7	m/uL	NULL	NULL	NULL	NULL	92.5	K/uL	8.75	g/dL	14.6	%	26.55	%	2.4	g/dL	NULL	NULL	NULL	NULL	139.5	mEq/L	4.55	mEq/L	7.65	mg/dL	104	mEq/L	66.5	mg/dL	NULL	NULL	18.5	mEq/L	NULL	NULL	NULL	NULL	NULL	NULL
10415581	23395056	60	1	UNKNOWN	Private	English	NULL	18.5	K/uL	4.19	m/uL	NULL	NULL	NULL	NULL	258	K/uL	12.1	g/dL	14.4	%	39.4	%	2.7	g/dL	NULL	NULL	NULL	NULL	132.5	mEq/L	6.35	mEq/L	8.9	mg/dL	95	mEq/L	404.5	mg/dL	NULL	NULL	11	mEq/L	7.17	units	76.8	mm Hg	68.4	mm Hg
10418550	25475514	80	0	WHITE	Medicare	English	WIDOWED	9.2	K/uL	3.86	m/uL	NULL	NULL	NULL	NULL	170	K/uL	11.9	g/dL	13	%	35.5	%	NULL	NULL	NULL	NULL	NULL	NULL	139	mEq/L	4	mEq/L	NULL	NULL	101	mEq/L	129	mg/dL	NULL	NULL	14	mEq/L	NULL	NULL	NULL	NULL	NULL	NULL
10420289	22265416	81	0	WHITE - OTHER EUROPEAN	Medicare	English	SINGLE	4.8	K/uL	4.37	m/uL	NULL	NULL	NULL	NULL	214	K/uL	12.7	g/dL	15.2	%	40.8	%	NULL	NULL	NULL	NULL	NULL	NULL	139.67	mEq/L	3.87	mEq/L	8.8	mg/dL	100	mEq/L	145	mg/dL	6.7	%	11.67	mEq/L	NULL	NULL	NULL	NULL	NULL	NULL
10437624	24874267	62	1	BLACK/AFRICAN AMERICAN	Medicare	English	SINGLE	3.6	K/uL	4.69	m/uL	NULL	NULL	NULL	NULL	152	K/uL	9.7	g/dL	16.8	%	30.5	%	NULL	NULL	NULL	NULL	NULL	NULL	133.5	mEq/L	5.05	mEq/L	9.1	mg/dL	89.5	mEq/L	107.5	mg/dL	NULL	NULL	13.5	mEq/L	7.26	units	86	mm Hg	61	mm Hg
10438032	28711073	77	1	UNKNOWN	Medicare	English	SINGLE	11.27	K/uL	3.6	m/uL	NULL	NULL	NULL	NULL	121.33	K/uL	10.83	g/dL	13.87	%	33.4	%	NULL	NULL	NULL	NULL	NULL	NULL	137	mEq/L	4.1	mEq/L	8.55	mg/dL	101.5	mEq/L	208	mg/dL	NULL	NULL	14.5	mEq/L	7.41	units	39	mm Hg	88	mm Hg
10439110	29492926	55	0	WHITE	Medicaid	English	SINGLE	12.8	K/uL	3.86	m/uL	8.65	K/uL	3.13	K/uL	272	K/uL	10.4	g/dL	14.7	%	33.1	%	3.7	g/dL	NULL	NULL	NULL	NULL	141	mEq/L	4.6	mEq/L	9.4	mg/dL	102	mEq/L	125	mg/dL	NULL	NULL	23	mEq/L	NULL	NULL	NULL	NULL	NULL	NULL
10448050	20080555	80	0	BLACK/AFRICAN AMERICAN	Medicare	English	WIDOWED	NULL	NULL	NULL	NULL	NULL	NULL	NULL	NULL	NULL	NULL	NULL	NULL	NULL	NULL	NULL	NULL	NULL	NULL	NULL	NULL	NULL	NULL	NULL	NULL	NULL	NULL	NULL	NULL	NULL	NULL	NULL	NULL	NULL	NULL	NULL	NULL	NULL	NULL	NULL	NULL	NULL	NULL
10469316	23534643	60	0	WHITE	Medicaid	English	DIVORCED	15.45	K/uL	3.43	m/uL	10.4	K/uL	1.95	K/uL	185	K/uL	11.4	g/dL	13.45	%	34.33	%	2.75	g/dL	NULL	NULL	NULL	NULL	137.5	mEq/L	4.55	mEq/L	8.2	mg/dL	102.67	mEq/L	86.5	mg/dL	5.6	%	7.67	mEq/L	7.45	units	37.6	mm Hg	345.4	mm Hg
10469318	25419466	89	1	UNKNOWN	Medicare	English	NULL	13.05	K/uL	2.98	m/uL	11.65	K/uL	0.49	K/uL	211	K/uL	8.05	g/dL	15.7	%	25.6	%	3.3	g/dL	NULL	NULL	NULL	NULL	136.5	mEq/L	3.65	mEq/L	8.1	mg/dL	102	mEq/L	72	mg/dL	NULL	NULL	17	mEq/L	7.39	units	44.5	mm Hg	40.5	mm Hg
10478072	27763565	62	0	WHITE	Medicaid	English	SINGLE	5.2	K/uL	3.88	m/uL	NULL	NULL	NULL	NULL	259	K/uL	12	g/dL	13.2	%	34.6	%	NULL	NULL	NULL	NULL	NULL	NULL	141	mEq/L	3.7	mEq/L	NULL	NULL	107	mEq/L	90	mg/dL	NULL	NULL	16	mEq/L	NULL	NULL	NULL	NULL	NULL	NULL
10485419	26881539	92	0	WHITE	Medicare	English	WIDOWED	12	K/uL	4.19	m/uL	NULL	NULL	NULL	NULL	194	K/uL	12.6	g/dL	13.9	%	40	%	NULL	NULL	NULL	NULL	NULL	NULL	145	mEq/L	3.8	mEq/L	8.8	mg/dL	111	mEq/L	90	mg/dL	NULL	NULL	10	mEq/L	NULL	NULL	NULL	NULL	NULL	NULL
10491701	22110024	71	1	WHITE	Medicare	English	MARRIED	13.8	K/uL	3.93	m/uL	NULL	NULL	NULL	NULL	256	K/uL	11.8	g/dL	13.7	%	37.4	%	3.8	g/dL	NULL	NULL	NULL	NULL	140	mEq/L	4.9	mEq/L	9.7	mg/dL	102	mEq/L	214	mg/dL	NULL	NULL	9	mEq/L	7.32	units	59	mm Hg	113	mm Hg
10496572	23881613	68	1	OTHER	Medicare	Portuguese	MARRIED	6.8	K/uL	3.35	m/uL	NULL	NULL	NULL	NULL	296	K/uL	9.4	g/dL	17.3	%	29.3	%	NULL	NULL	NULL	NULL	NULL	NULL	140	mEq/L	3.9	mEq/L	8.6	mg/dL	98	mEq/L	205	mg/dL	NULL	NULL	16	mEq/L	NULL	NULL	NULL	NULL	NULL	NULL
10498740	28729985	83	1	WHITE	Medicare	English	MARRIED	6.5	K/uL	2.79	m/uL	NULL	NULL	NULL	NULL	119	K/uL	7.8	g/dL	20.4	%	26.6	%	3.5	g/dL	NULL	NULL	NULL	NULL	142	mEq/L	3.6	mEq/L	NULL	NULL	102	mEq/L	127	mg/dL	7.5	%	11	mEq/L	NULL	NULL	NULL	NULL	NULL	NULL
10504317	22645492	63	1	UNKNOWN	Medicare	English	NULL	6.5	K/uL	4.39	m/uL	NULL	NULL	NULL	NULL	277.5	K/uL	9.7	g/dL	20	%	31.9	%	NULL	NULL	NULL	NULL	NULL	NULL	137.33	mEq/L	3.3	mEq/L	8.7	mg/dL	93.33	mEq/L	101.33	mg/dL	NULL	NULL	10	mEq/L	7.37	units	63	mm Hg	41	mm Hg
10504424	28594235	76	1	WHITE	Medicare	English	WIDOWED	22.65	K/uL	5.22	m/uL	NULL	NULL	NULL	NULL	260.5	K/uL	14.55	g/dL	15	%	44.95	%	4	g/dL	NULL	NULL	NULL	NULL	135.5	mEq/L	4.6	mEq/L	9.1	mg/dL	92	mEq/L	97.5	mg/dL	NULL	NULL	22.5	mEq/L	7.36	units	42.5	mm Hg	158.5	mm Hg
10506106	24437211	70	1	WHITE - RUSSIAN	Private	Russian	MARRIED	NULL	NULL	NULL	NULL	NULL	NULL	NULL	NULL	NULL	NULL	NULL	NULL	NULL	NULL	NULL	NULL	NULL	NULL	NULL	NULL	NULL	NULL	NULL	NULL	NULL	NULL	NULL	NULL	NULL	NULL	NULL	NULL	NULL	NULL	NULL	NULL	NULL	NULL	NULL	NULL	NULL	NULL
10506221	21013449	65	1	WHITE	Medicare	English	SINGLE	NULL	NULL	NULL	NULL	NULL	NULL	NULL	NULL	NULL	NULL	NULL	NULL	NULL	NULL	NULL	NULL	NULL	NULL	NULL	NULL	NULL	NULL	NULL	NULL	NULL	NULL	NULL	NULL	NULL	NULL	NULL	NULL	NULL	NULL	NULL	NULL	NULL	NULL	NULL	NULL	NULL	NULL
10510161	21672773	69	1	BLACK/AFRICAN AMERICAN	Medicare	English	MARRIED	11.5	K/uL	4.44	m/uL	NULL	NULL	NULL	NULL	221	K/uL	13.9	g/dL	14.4	%	42.5	%	NULL	NULL	NULL	NULL	NULL	NULL	139	mEq/L	3.3	mEq/L	10.2	mg/dL	101	mEq/L	231	mg/dL	NULL	NULL	17	mEq/L	NULL	NULL	NULL	NULL	NULL	NULL
10512110	21059905	68	1	WHITE	Medicare	English	DIVORCED	7.7	K/uL	2.88	m/uL	NULL	NULL	NULL	NULL	282	K/uL	9.5	g/dL	14.2	%	29.5	%	NULL	NULL	NULL	NULL	NULL	NULL	132	mEq/L	4.5	mEq/L	8.8	mg/dL	94	mEq/L	128	mg/dL	NULL	NULL	10	mEq/L	7.25	units	64	mm Hg	25	mm Hg
10513809	26401848	61	1	WHITE - OTHER EUROPEAN	Medicare	English	SINGLE	24.83	K/uL	2.42	m/uL	25.59	K/uL	1.68	K/uL	158.67	K/uL	7.87	g/dL	16.3	%	23.97	%	2.3	g/dL	NULL	NULL	NULL	NULL	131	mEq/L	3.57	mEq/L	7.1	mg/dL	93	mEq/L	128.33	mg/dL	NULL	NULL	18.67	mEq/L	7.43	units	33	mm Hg	39	mm Hg
10517800	27114572	82	1	UNKNOWN	Medicare	English	NULL	14.2	K/uL	4.49	m/uL	NULL	NULL	NULL	NULL	159	K/uL	13.3	g/dL	13	%	42.3	%	NULL	NULL	NULL	NULL	NULL	NULL	NULL	NULL	NULL	NULL	NULL	NULL	NULL	NULL	NULL	NULL	NULL	NULL	NULL	NULL	NULL	NULL	NULL	NULL	NULL	NULL
10527178	29318869	78	1	HISPANIC/LATINO - DOMINICAN	Medicaid	Spanish	MARRIED	10.5	K/uL	3.81	m/uL	NULL	NULL	NULL	NULL	213.67	K/uL	11.27	g/dL	12.27	%	32.27	%	NULL	NULL	NULL	NULL	NULL	NULL	126.33	mEq/L	4.8	mEq/L	8.43	mg/dL	87	mEq/L	129.33	mg/dL	NULL	NULL	16.33	mEq/L	NULL	NULL	NULL	NULL	NULL	NULL
10529348	21108917	77	1	UNKNOWN	Medicare	English	NULL	17.3	K/uL	5.3	m/uL	13.24	K/uL	1.69	K/uL	303	K/uL	12.7	g/dL	18.1	%	43	%	NULL	NULL	NULL	NULL	NULL	NULL	142	mEq/L	4.9	mEq/L	9.6	mg/dL	101	mEq/L	91	mg/dL	NULL	NULL	11	mEq/L	NULL	NULL	NULL	NULL	NULL	NULL
10531609	29068949	77	0	UNKNOWN	Medicare	English	MARRIED	8.7	K/uL	4.54	m/uL	NULL	NULL	NULL	NULL	183	K/uL	12.4	g/dL	17.4	%	40.2	%	NULL	NULL	NULL	NULL	NULL	NULL	143.5	mEq/L	3.7	mEq/L	8.8	mg/dL	99.5	mEq/L	170	mg/dL	7.1	%	11.5	mEq/L	NULL	NULL	NULL	NULL	NULL	NULL
10538933	28265356	69	1	WHITE	Medicare	English	SINGLE	NULL	NULL	NULL	NULL	NULL	NULL	NULL	NULL	NULL	NULL	NULL	NULL	NULL	NULL	NULL	NULL	NULL	NULL	NULL	NULL	NULL	NULL	NULL	NULL	NULL	NULL	NULL	NULL	NULL	NULL	NULL	NULL	NULL	NULL	NULL	NULL	NULL	NULL	NULL	NULL	NULL	NULL
10541741	28827617	64	1	WHITE	Private	English	DIVORCED	13.6	K/uL	4.42	m/uL	NULL	NULL	NULL	NULL	234	K/uL	12.9	g/dL	13	%	39.8	%	NULL	NULL	NULL	NULL	NULL	NULL	141	mEq/L	4	mEq/L	8.4	mg/dL	107	mEq/L	145	mg/dL	NULL	NULL	8	mEq/L	7.34	units	50	mm Hg	210	mm Hg
10549214	28665460	68	1	UNKNOWN	Medicare	English	NULL	19.1	K/uL	4.6	m/uL	NULL	NULL	NULL	NULL	238	K/uL	14.3	g/dL	12.9	%	43.5	%	NULL	NULL	NULL	NULL	NULL	NULL	137	mEq/L	4.3	mEq/L	NULL	NULL	101	mEq/L	233	mg/dL	NULL	NULL	12	mEq/L	NULL	NULL	NULL	NULL	NULL	NULL
10549627	21492222	59	0	WHITE	Private	English	MARRIED	14.2	K/uL	3.6	m/uL	10.52	K/uL	1.97	K/uL	397	K/uL	11.8	g/dL	12.9	%	35	%	NULL	NULL	NULL	NULL	NULL	NULL	135	mEq/L	3.6	mEq/L	9.1	mg/dL	96	mEq/L	240	mg/dL	11	%	16	mEq/L	NULL	NULL	NULL	NULL	NULL	NULL
10558720	25124566	73	0	WHITE	Medicare	English	DIVORCED	7	K/uL	3.25	m/uL	NULL	NULL	NULL	NULL	265	K/uL	9.1	g/dL	14.3	%	29.1	%	NULL	NULL	NULL	NULL	NULL	NULL	138	mEq/L	4.1	mEq/L	8.3	mg/dL	102	mEq/L	145	mg/dL	NULL	NULL	12	mEq/L	7.28	units	56	mm Hg	38	mm Hg
10558865	24864673	64	0	WHITE	Private	English	SINGLE	7.5	K/uL	4.04	m/uL	NULL	NULL	NULL	NULL	339	K/uL	11.8	g/dL	13.5	%	36.2	%	NULL	NULL	NULL	NULL	NULL	NULL	139	mEq/L	4.4	mEq/L	9.2	mg/dL	97	mEq/L	369	mg/dL	NULL	NULL	15	mEq/L	NULL	NULL	NULL	NULL	NULL	NULL
10570949	27040953	66	1	WHITE	Medicare	English	SINGLE	12.6	K/uL	3.79	m/uL	NULL	NULL	NULL	NULL	250	K/uL	9.8	g/dL	16.4	%	33	%	3.5	g/dL	NULL	NULL	NULL	NULL	138	mEq/L	4.65	mEq/L	8.55	mg/dL	104	mEq/L	183	mg/dL	NULL	NULL	10.5	mEq/L	7.26	units	64.33	mm Hg	51.67	mm Hg
10572152	21471014	66	0	WHITE - OTHER EUROPEAN	Private	English	DIVORCED	8.5	K/uL	4.57	m/uL	NULL	NULL	NULL	NULL	144	K/uL	13.9	g/dL	15.5	%	42.5	%	NULL	NULL	NULL	NULL	NULL	NULL	139	mEq/L	3.5	mEq/L	9.9	mg/dL	101	mEq/L	80	mg/dL	NULL	NULL	12	mEq/L	NULL	NULL	NULL	NULL	NULL	NULL
10574416	27926318	82	0	OTHER	Medicare	Portuguese	WIDOWED	9.7	K/uL	4.57	m/uL	NULL	NULL	NULL	NULL	283.5	K/uL	13.75	g/dL	13.15	%	42.25	%	NULL	NULL	NULL	NULL	NULL	NULL	140	mEq/L	4.2	mEq/L	9.35	mg/dL	105.5	mEq/L	229	mg/dL	NULL	NULL	12.5	mEq/L	NULL	NULL	NULL	NULL	NULL	NULL
10578322	29510782	67	1	WHITE	Medicare	English	MARRIED	7	K/uL	3.51	m/uL	NULL	NULL	NULL	NULL	168	K/uL	12.3	g/dL	12.9	%	37.2	%	NULL	NULL	NULL	NULL	NULL	NULL	NULL	NULL	NULL	NULL	NULL	NULL	NULL	NULL	NULL	NULL	NULL	NULL	NULL	NULL	NULL	NULL	NULL	NULL	NULL	NULL
10581219	23529797	84	0	WHITE	Medicare	English	SINGLE	14.5	K/uL	4.09	m/uL	NULL	NULL	NULL	NULL	213	K/uL	12.5	g/dL	14	%	38.3	%	NULL	NULL	NULL	NULL	NULL	NULL	137	mEq/L	4	mEq/L	9.4	mg/dL	98	mEq/L	139	mg/dL	NULL	NULL	15	mEq/L	NULL	NULL	NULL	NULL	NULL	NULL
10587636	29021087	60	1	WHITE	Medicaid	English	NULL	6.7	K/uL	3.6	m/uL	NULL	NULL	NULL	NULL	176	K/uL	12.5	g/dL	14.7	%	33.4	%	NULL	NULL	NULL	NULL	NULL	NULL	140	mEq/L	3.9	mEq/L	8.7	mg/dL	103	mEq/L	154	mg/dL	6.1	%	13	mEq/L	NULL	NULL	NULL	NULL	NULL	NULL
10588688	20387424	66	1	WHITE	Medicare	English	SINGLE	6.2	K/uL	5.13	m/uL	NULL	NULL	NULL	NULL	206	K/uL	14.9	g/dL	13.3	%	45	%	3.5	g/dL	NULL	NULL	NULL	NULL	138.5	mEq/L	3.95	mEq/L	NULL	NULL	105.5	mEq/L	141	mg/dL	7.2	%	10	mEq/L	NULL	NULL	NULL	NULL	NULL	NULL
10590766	28560033	73	0	WHITE	Private	English	WIDOWED	9.3	K/uL	3.2	m/uL	NULL	NULL	NULL	NULL	313	K/uL	8.6	g/dL	15.3	%	27.4	%	NULL	NULL	NULL	NULL	NULL	NULL	140.5	mEq/L	3.9	mEq/L	9.7	mg/dL	97	mEq/L	111	mg/dL	NULL	NULL	20.5	mEq/L	NULL	NULL	NULL	NULL	NULL	NULL
10607049	26765748	55	1	UNKNOWN	Medicare	English	SINGLE	19.35	K/uL	4.81	m/uL	18.73	K/uL	1.32	K/uL	256.5	K/uL	13.85	g/dL	13.1	%	42.8	%	NULL	NULL	NULL	NULL	NULL	NULL	137.5	mEq/L	4.9	mEq/L	9.4	mg/dL	104	mEq/L	166.5	mg/dL	NULL	NULL	15	mEq/L	7.33	units	47	mm Hg	45	mm Hg
10608830	25004426	56	1	PORTUGUESE	Medicaid	English	MARRIED	8.68	K/uL	3.91	m/uL	7.99	K/uL	0.26	K/uL	272.25	K/uL	10.38	g/dL	16.35	%	33.6	%	NULL	NULL	NULL	NULL	NULL	NULL	136.67	mEq/L	4.6	mEq/L	9.33	mg/dL	96.67	mEq/L	269.33	mg/dL	9.4	%	16.33	mEq/L	7.38	units	44.56	mm Hg	143.11	mm Hg
10615985	25732568	72	0	WHITE	Medicare	English	SINGLE	17.4	K/uL	3.59	m/uL	NULL	NULL	NULL	NULL	394	K/uL	9.9	g/dL	15.1	%	32.1	%	3.1	g/dL	NULL	NULL	NULL	NULL	127	mEq/L	4.1	mEq/L	8.7	mg/dL	93	mEq/L	120	mg/dL	8.6	%	12	mEq/L	NULL	NULL	NULL	NULL	NULL	NULL
10618339	22460572	65	1	WHITE	Private	English	MARRIED	NULL	NULL	NULL	NULL	NULL	NULL	NULL	NULL	NULL	NULL	NULL	NULL	NULL	NULL	NULL	NULL	NULL	NULL	NULL	NULL	NULL	NULL	NULL	NULL	NULL	NULL	NULL	NULL	NULL	NULL	NULL	NULL	NULL	NULL	NULL	NULL	NULL	NULL	NULL	NULL	NULL	NULL
10622212	21564983	53	0	UNKNOWN	Medicare	English	NULL	11.3	K/uL	3.77	m/uL	NULL	NULL	NULL	NULL	248	K/uL	9.9	g/dL	16.2	%	34.1	%	NULL	NULL	NULL	NULL	NULL	NULL	145	mEq/L	3.3	mEq/L	NULL	NULL	101	mEq/L	162	mg/dL	NULL	NULL	13	mEq/L	NULL	NULL	NULL	NULL	NULL	NULL
10623327	25540393	64	1	WHITE	Medicare	English	SINGLE	NULL	NULL	NULL	NULL	NULL	NULL	NULL	NULL	NULL	NULL	NULL	NULL	NULL	NULL	NULL	NULL	NULL	NULL	NULL	NULL	NULL	NULL	NULL	NULL	NULL	NULL	NULL	NULL	NULL	NULL	NULL	NULL	NULL	NULL	NULL	NULL	NULL	NULL	NULL	NULL	NULL	NULL
10642194	24926322	79	1	WHITE	Medicare	English	MARRIED	8.8	K/uL	3.31	m/uL	6.48	K/uL	0.72	K/uL	419	K/uL	8.7	g/dL	19.2	%	28.3	%	3.6	g/dL	NULL	NULL	NULL	NULL	135.5	mEq/L	4.6	mEq/L	9.15	mg/dL	101	mEq/L	101.5	mg/dL	NULL	NULL	16	mEq/L	NULL	NULL	NULL	NULL	NULL	NULL
10643269	29246051	72	0	BLACK/AFRICAN AMERICAN	Medicare	English	DIVORCED	7.2	K/uL	4.31	m/uL	4.53	K/uL	1.89	K/uL	282	K/uL	11.6	g/dL	15.9	%	37.5	%	NULL	NULL	NULL	NULL	NULL	NULL	142	mEq/L	4.05	mEq/L	9.15	mg/dL	100	mEq/L	122.5	mg/dL	NULL	NULL	15	mEq/L	NULL	NULL	NULL	NULL	NULL	NULL
10643501	29453096	73	1	UNKNOWN	Medicare	English	NULL	10.5	K/uL	4.29	m/uL	NULL	NULL	NULL	NULL	230	K/uL	13.7	g/dL	12.3	%	40.2	%	3.6	g/dL	NULL	NULL	NULL	NULL	134	mEq/L	4.2	mEq/L	NULL	NULL	106	mEq/L	154	mg/dL	6.8	%	4	mEq/L	NULL	NULL	NULL	NULL	NULL	NULL
10645575	20878785	54	1	UNABLE TO OBTAIN	Medicare	English	NULL	17.35	K/uL	5.02	m/uL	18.25	K/uL	2.43	K/uL	243.25	K/uL	15.53	g/dL	13.6	%	46.13	%	3.7	g/dL	NULL	NULL	NULL	NULL	138.25	mEq/L	4.3	mEq/L	8.18	mg/dL	108.25	mEq/L	288	mg/dL	NULL	NULL	16	mEq/L	7.33	units	28.6	mm Hg	163.2	mm Hg
10650897	20084358	67	1	WHITE	Medicare	English	MARRIED	13	K/uL	4.35	m/uL	10.72	K/uL	0.81	K/uL	191	K/uL	12.9	g/dL	14.6	%	41.5	%	NULL	NULL	NULL	NULL	NULL	NULL	142.67	mEq/L	4.4	mEq/L	9.43	mg/dL	103.67	mEq/L	111	mg/dL	7.5	%	13	mEq/L	NULL	NULL	NULL	NULL	NULL	NULL
10654840	25596469	80	1	WHITE	Medicare	English	MARRIED	NULL	NULL	NULL	NULL	NULL	NULL	NULL	NULL	NULL	NULL	NULL	NULL	NULL	NULL	NULL	NULL	NULL	NULL	NULL	NULL	NULL	NULL	NULL	NULL	NULL	NULL	NULL	NULL	NULL	NULL	NULL	NULL	NULL	NULL	NULL	NULL	NULL	NULL	NULL	NULL	NULL	NULL
10662181	22607104	75	1	WHITE	Medicare	English	MARRIED	7.87	K/uL	4.27	m/uL	6.57	K/uL	0.72	K/uL	317.67	K/uL	11.6	g/dL	18.2	%	39.23	%	3.6	g/dL	NULL	NULL	NULL	NULL	140.75	mEq/L	5.78	mEq/L	9.05	mg/dL	95.5	mEq/L	106.5	mg/dL	NULL	NULL	28	mEq/L	7.2	units	50.33	mm Hg	84	mm Hg
10675537	25882276	77	1	WHITE - OTHER EUROPEAN	Medicare	English	MARRIED	7.9	K/uL	4.16	m/uL	NULL	NULL	NULL	NULL	156	K/uL	11.7	g/dL	13.1	%	35.5	%	NULL	NULL	NULL	NULL	NULL	NULL	141	mEq/L	4.1	mEq/L	9.2	mg/dL	106	mEq/L	202	mg/dL	NULL	NULL	13	mEq/L	NULL	NULL	NULL	NULL	NULL	NULL
10675623	23523021	82	1	WHITE	Medicare	English	WIDOWED	14.73	K/uL	2.88	m/uL	10.22	K/uL	1.08	K/uL	89.33	K/uL	9.13	g/dL	14.6	%	27.92	%	NULL	NULL	NULL	NULL	NULL	NULL	141	mEq/L	4.43	mEq/L	8.4	mg/dL	109.33	mEq/L	122	mg/dL	NULL	NULL	12	mEq/L	7.33	units	49.56	mm Hg	137.22	mm Hg
10676484	26437808	80	1	UNKNOWN	Medicare	English	MARRIED	16.24	K/uL	3.68	m/uL	11.02	K/uL	1.83	K/uL	150.8	K/uL	11.22	g/dL	14.56	%	35.52	%	3.8	g/dL	NULL	NULL	NULL	NULL	137.33	mEq/L	4.33	mEq/L	8.27	mg/dL	106.25	mEq/L	120.33	mg/dL	6.1	%	9.5	mEq/L	7.32	units	47.58	mm Hg	183.67	mm Hg
10682165	20356928	83	0	HISPANIC OR LATINO	Medicare	Spanish	SINGLE	5.85	K/uL	3.4	m/uL	NULL	NULL	NULL	NULL	311	K/uL	8.25	g/dL	25.7	%	28	%	NULL	NULL	NULL	NULL	NULL	NULL	139.5	mEq/L	4.3	mEq/L	9.3	mg/dL	98.5	mEq/L	146	mg/dL	5.2	%	12.5	mEq/L	7.45	units	44	mm Hg	187	mm Hg
10684873	29431425	54	0	WHITE	Medicaid	English	WIDOWED	12.2	K/uL	4.44	m/uL	NULL	NULL	NULL	NULL	135	K/uL	12	g/dL	13.9	%	34.4	%	NULL	NULL	NULL	NULL	NULL	NULL	132	mEq/L	3.1	mEq/L	8.3	mg/dL	93	mEq/L	162	mg/dL	NULL	NULL	17	mEq/L	NULL	NULL	NULL	NULL	NULL	NULL
10685576	26034285	70	0	UNKNOWN	Medicare	Polish	NULL	12.3	K/uL	3.81	m/uL	11.37	K/uL	0.53	K/uL	254	K/uL	9.6	g/dL	14.4	%	30.4	%	NULL	NULL	NULL	NULL	NULL	NULL	137	mEq/L	4.6	mEq/L	8.4	mg/dL	102	mEq/L	223	mg/dL	NULL	NULL	13	mEq/L	7.37	units	41.5	mm Hg	73.5	mm Hg
10686379	25777432	92	1	WHITE	Medicare	English	WIDOWED	9.4	K/uL	4.79	m/uL	NULL	NULL	NULL	NULL	188	K/uL	14	g/dL	13.4	%	44.5	%	3.5	g/dL	NULL	NULL	NULL	NULL	141	mEq/L	4.1	mEq/L	9.7	mg/dL	101	mEq/L	109	mg/dL	NULL	NULL	17	mEq/L	NULL	NULL	NULL	NULL	NULL	NULL
10693162	26916941	54	1	WHITE	Medicaid	English	MARRIED	22.3	K/uL	5.42	m/uL	NULL	NULL	NULL	NULL	157	K/uL	17.1	g/dL	13.7	%	53.5	%	2.1	g/dL	NULL	NULL	NULL	NULL	136.5	mEq/L	5.2	mEq/L	8.7	mg/dL	94.5	mEq/L	224.5	mg/dL	11.2	%	9	mEq/L	7.31	units	73	mm Hg	79.63	mm Hg
10693530	26952865	66	1	BLACK/AFRICAN AMERICAN	Medicare	English	SINGLE	NULL	NULL	NULL	NULL	NULL	NULL	NULL	NULL	NULL	NULL	NULL	NULL	NULL	NULL	NULL	NULL	NULL	NULL	NULL	NULL	NULL	NULL	NULL	NULL	NULL	NULL	NULL	NULL	NULL	NULL	NULL	NULL	NULL	NULL	NULL	NULL	NULL	NULL	NULL	NULL	NULL	NULL
10695612	29721508	67	1	WHITE	Medicare	English	DIVORCED	NULL	NULL	NULL	NULL	NULL	NULL	NULL	NULL	NULL	NULL	NULL	NULL	NULL	NULL	NULL	NULL	NULL	NULL	NULL	NULL	NULL	NULL	NULL	NULL	NULL	NULL	NULL	NULL	NULL	NULL	NULL	NULL	NULL	NULL	NULL	NULL	NULL	NULL	NULL	NULL	NULL	NULL
10703413	22279022	57	1	WHITE	Private	English	MARRIED	NULL	NULL	NULL	NULL	NULL	NULL	NULL	NULL	NULL	NULL	NULL	NULL	NULL	NULL	NULL	NULL	NULL	NULL	NULL	NULL	NULL	NULL	137	mEq/L	3.8	mEq/L	8.4	mg/dL	102	mEq/L	108	mg/dL	NULL	NULL	16	mEq/L	NULL	NULL	NULL	NULL	NULL	NULL
10715003	20924297	90	1	WHITE - EASTERN EUROPEAN	Medicare	English	WIDOWED	10.8	K/uL	3.98	m/uL	NULL	NULL	NULL	NULL	235	K/uL	13.3	g/dL	11.7	%	38.5	%	NULL	NULL	NULL	NULL	NULL	NULL	126.5	mEq/L	4.7	mEq/L	8.7	mg/dL	87	mEq/L	142	mg/dL	NULL	NULL	17	mEq/L	NULL	NULL	NULL	NULL	NULL	NULL
10717791	29221831	83	1	WHITE	Medicare	English	MARRIED	8	K/uL	2.71	m/uL	5.02	K/uL	1.05	K/uL	250	K/uL	8.75	g/dL	13.8	%	28.4	%	2.9	g/dL	NULL	NULL	NULL	NULL	138	mEq/L	5	mEq/L	8.83	mg/dL	100.67	mEq/L	98.67	mg/dL	8.1	%	27	mEq/L	7.3	units	39.5	mm Hg	81	mm Hg
10718222	29924771	62	1	WHITE	NULL	English	MARRIED	11.5	K/uL	4.53	m/uL	NULL	NULL	NULL	NULL	134	K/uL	13.7	g/dL	13.9	%	42.1	%	NULL	NULL	NULL	NULL	NULL	NULL	143	mEq/L	4	mEq/L	9.1	mg/dL	99	mEq/L	134	mg/dL	6.5	%	14	mEq/L	NULL	NULL	NULL	NULL	NULL	NULL
10719232	21504621	77	0	WHITE	Medicaid	English	DIVORCED	9.2	K/uL	4.37	m/uL	7.17	K/uL	0.85	K/uL	194	K/uL	12.3	g/dL	14.6	%	39.8	%	NULL	NULL	NULL	NULL	NULL	NULL	137	mEq/L	4.3	mEq/L	NULL	NULL	101	mEq/L	97	mg/dL	NULL	NULL	13	mEq/L	NULL	NULL	NULL	NULL	NULL	NULL
10729759	20371629	70	0	UNKNOWN	Medicare	English	NULL	16.5	K/uL	4.47	m/uL	NULL	NULL	NULL	NULL	246	K/uL	13	g/dL	13.8	%	39.8	%	NULL	NULL	NULL	NULL	NULL	NULL	139	mEq/L	3.8	mEq/L	9.3	mg/dL	101	mEq/L	134	mg/dL	NULL	NULL	17	mEq/L	NULL	NULL	NULL	NULL	NULL	NULL
10734544	27527774	64	1	WHITE	Private	English	MARRIED	7.1	K/uL	3.29	m/uL	6.28	K/uL	0.16	K/uL	125	K/uL	10.5	g/dL	12.7	%	33.5	%	4.8	g/dL	NULL	NULL	NULL	NULL	142	mEq/L	5.3	mEq/L	NULL	NULL	98	mEq/L	117	mg/dL	NULL	NULL	21	mEq/L	NULL	NULL	NULL	NULL	NULL	NULL
10735053	20919930	67	0	WHITE	Medicare	English	MARRIED	10.3	K/uL	4.17	m/uL	NULL	NULL	NULL	NULL	199	K/uL	13.4	g/dL	14.1	%	41.1	%	NULL	NULL	NULL	NULL	NULL	NULL	137	mEq/L	3.1	mEq/L	9.1	mg/dL	99	mEq/L	144	mg/dL	NULL	NULL	14	mEq/L	NULL	NULL	NULL	NULL	NULL	NULL
10746146	20398127	89	1	WHITE	Medicare	English	MARRIED	12.32	K/uL	3.09	m/uL	NULL	NULL	NULL	NULL	147.8	K/uL	9.7	g/dL	16.12	%	30	%	NULL	NULL	NULL	NULL	NULL	NULL	135	mEq/L	5.43	mEq/L	7.7	mg/dL	102	mEq/L	151	mg/dL	NULL	NULL	9.67	mEq/L	7.33	units	37.67	mm Hg	126.67	mm Hg
10756520	29991754	82	0	WHITE	Medicare	English	DIVORCED	9.35	K/uL	4.06	m/uL	NULL	NULL	NULL	NULL	215.5	K/uL	11.05	g/dL	18.65	%	37.25	%	3.4	g/dL	NULL	NULL	NULL	NULL	145	mEq/L	4.1	mEq/L	8.1	mg/dL	110.75	mEq/L	142.5	mg/dL	NULL	NULL	17.5	mEq/L	7.22	units	58.8	mm Hg	112.8	mm Hg
10777534	23246716	73	0	BLACK/AFRICAN AMERICAN	Medicare	English	MARRIED	NULL	NULL	NULL	NULL	NULL	NULL	NULL	NULL	NULL	NULL	NULL	NULL	NULL	NULL	NULL	NULL	NULL	NULL	NULL	NULL	NULL	NULL	NULL	NULL	NULL	NULL	NULL	NULL	NULL	NULL	NULL	NULL	NULL	NULL	NULL	NULL	NULL	NULL	NULL	NULL	NULL	NULL
10779029	26020793	84	0	UNKNOWN	Medicare	English	WIDOWED	47.05	K/uL	2.4	m/uL	43.53	K/uL	1.18	K/uL	218	K/uL	7.15	g/dL	17.25	%	25.55	%	NULL	NULL	NULL	NULL	NULL	NULL	136	mEq/L	5.55	mEq/L	6.8	mg/dL	96.5	mEq/L	241.5	mg/dL	NULL	NULL	33	mEq/L	7.05	units	41.4	mm Hg	42.6	mm Hg
10779535	28807232	64	1	AMERICAN INDIAN/ALASKA NATIVE	Medicaid	Spanish	SINGLE	7.2	K/uL	3.93	m/uL	NULL	NULL	NULL	NULL	108	K/uL	12.9	g/dL	12.1	%	37.7	%	NULL	NULL	NULL	NULL	NULL	NULL	142	mEq/L	4.3	mEq/L	9.3	mg/dL	102	mEq/L	208	mg/dL	7.8	%	13	mEq/L	NULL	NULL	NULL	NULL	NULL	NULL
10790436	24896451	57	1	WHITE	Other	English	MARRIED	2.37	K/uL	3.82	m/uL	0.92	K/uL	0.72	K/uL	64.33	K/uL	11.6	g/dL	12.63	%	34.03	%	3.7	g/dL	NULL	NULL	NULL	NULL	138	mEq/L	4.7	mEq/L	8.5	mg/dL	105	mEq/L	211	mg/dL	NULL	NULL	15	mEq/L	NULL	NULL	NULL	NULL	NULL	NULL
10802465	29492382	48	1	WHITE	Private	English	MARRIED	6.96	K/uL	3.21	m/uL	3.31	K/uL	3.76	K/uL	68.6	K/uL	9.72	g/dL	14.62	%	30.22	%	1.9	g/dL	NULL	NULL	NULL	NULL	133.4	mEq/L	4.12	mEq/L	9.22	mg/dL	100	mEq/L	247.6	mg/dL	NULL	NULL	25.2	mEq/L	7.05	units	49.44	mm Hg	75.22	mm Hg
10809843	22029251	81	0	WHITE	Medicare	English	NULL	9.4	K/uL	4.41	m/uL	NULL	NULL	NULL	NULL	207.5	K/uL	13.15	g/dL	13.8	%	41	%	NULL	NULL	NULL	NULL	NULL	NULL	143.5	mEq/L	3.5	mEq/L	9.1	mg/dL	101	mEq/L	91	mg/dL	NULL	NULL	16.5	mEq/L	NULL	NULL	NULL	NULL	NULL	NULL
10815292	29052052	63	0	WHITE	Private	English	DIVORCED	9.7	K/uL	4.38	m/uL	NULL	NULL	NULL	NULL	266	K/uL	12.9	g/dL	11.9	%	39.5	%	NULL	NULL	NULL	NULL	NULL	NULL	140	mEq/L	4.4	mEq/L	NULL	NULL	102	mEq/L	207	mg/dL	NULL	NULL	16	mEq/L	NULL	NULL	NULL	NULL	NULL	NULL
10815952	27590034	82	1	UNKNOWN	Medicaid	English	NULL	4.95	K/uL	3.2	m/uL	4.36	K/uL	0.28	K/uL	113.5	K/uL	9.55	g/dL	14.85	%	33.35	%	3.6	g/dL	NULL	NULL	NULL	NULL	146	mEq/L	4.8	mEq/L	8.6	mg/dL	105	mEq/L	114.67	mg/dL	NULL	NULL	7.33	mEq/L	7.52	units	43.33	mm Hg	57.67	mm Hg
10830528	29618540	83	0	UNABLE TO OBTAIN	Medicare	Spanish	NULL	NULL	NULL	NULL	NULL	NULL	NULL	NULL	NULL	NULL	NULL	NULL	NULL	NULL	NULL	NULL	NULL	NULL	NULL	NULL	NULL	NULL	NULL	NULL	NULL	NULL	NULL	NULL	NULL	NULL	NULL	NULL	NULL	NULL	NULL	NULL	NULL	NULL	NULL	NULL	NULL	NULL	NULL
10830860	25935860	70	1	WHITE	Medicare	English	MARRIED	9.85	K/uL	5.16	m/uL	8.72	K/uL	0.69	K/uL	179.5	K/uL	14.7	g/dL	13.95	%	43.1	%	3.6	g/dL	NULL	NULL	NULL	NULL	136.5	mEq/L	3.85	mEq/L	9.55	mg/dL	101	mEq/L	91	mg/dL	NULL	NULL	14	mEq/L	NULL	NULL	NULL	NULL	NULL	NULL
10840951	23724055	84	0	WHITE	Medicare	English	WIDOWED	10.55	K/uL	3.67	m/uL	NULL	NULL	NULL	NULL	288.5	K/uL	8.35	g/dL	16.85	%	29.25	%	NULL	NULL	NULL	NULL	NULL	NULL	140.5	mEq/L	5.1	mEq/L	8.65	mg/dL	105	mEq/L	109.5	mg/dL	NULL	NULL	12	mEq/L	NULL	NULL	NULL	NULL	NULL	NULL
10843975	25156702	82	0	WHITE	Medicare	English	WIDOWED	NULL	NULL	NULL	NULL	NULL	NULL	NULL	NULL	NULL	NULL	NULL	NULL	NULL	NULL	NULL	NULL	NULL	NULL	NULL	NULL	NULL	NULL	NULL	NULL	NULL	NULL	NULL	NULL	NULL	NULL	NULL	NULL	NULL	NULL	NULL	NULL	NULL	NULL	NULL	NULL	NULL	NULL
10851133	26876208	92	0	WHITE	Medicare	Spanish	DIVORCED	10.45	K/uL	4.2	m/uL	9.08	K/uL	2.26	K/uL	217.5	K/uL	12.55	g/dL	14.3	%	39.35	%	NULL	NULL	NULL	NULL	NULL	NULL	140	mEq/L	4.75	mEq/L	9.6	mg/dL	102	mEq/L	126	mg/dL	NULL	NULL	20.5	mEq/L	NULL	NULL	NULL	NULL	NULL	NULL
10868878	26754705	53	0	WHITE	Medicaid	English	MARRIED	9.4	K/uL	4.52	m/uL	5.44	K/uL	2.86	K/uL	357.5	K/uL	12.65	g/dL	14.6	%	40.9	%	2.9	g/dL	NULL	NULL	NULL	NULL	138.5	mEq/L	3.85	mEq/L	9.05	mg/dL	105	mEq/L	196	mg/dL	10.1	%	11.5	mEq/L	NULL	NULL	NULL	NULL	NULL	NULL
10869304	20993521	76	0	UNABLE TO OBTAIN	Medicare	English	NULL	9.4	K/uL	3.76	m/uL	NULL	NULL	NULL	NULL	259	K/uL	11	g/dL	15.7	%	37.2	%	3.4	g/dL	NULL	NULL	NULL	NULL	142	mEq/L	4.4	mEq/L	9.5	mg/dL	98	mEq/L	182	mg/dL	NULL	NULL	15	mEq/L	NULL	NULL	NULL	NULL	NULL	NULL
10874076	24501157	81	1	ASIAN - CHINESE	Medicare	Chinese	MARRIED	5.85	K/uL	3.47	m/uL	NULL	NULL	NULL	NULL	148.5	K/uL	7.55	g/dL	24.1	%	24.75	%	NULL	NULL	NULL	NULL	NULL	NULL	135	mEq/L	4.7	mEq/L	8.6	mg/dL	105	mEq/L	143	mg/dL	NULL	NULL	10	mEq/L	7.41	units	35	mm Hg	72	mm Hg
10874497	22456152	72	0	WHITE	Medicare	English	DIVORCED	5.8	K/uL	3.82	m/uL	NULL	NULL	NULL	NULL	153	K/uL	12.3	g/dL	15	%	36.3	%	NULL	NULL	NULL	NULL	NULL	NULL	138	mEq/L	4.2	mEq/L	9.3	mg/dL	103	mEq/L	96	mg/dL	NULL	NULL	13	mEq/L	NULL	NULL	NULL	NULL	NULL	NULL
10877514	20806427	83	1	WHITE - OTHER EUROPEAN	Medicare	English	WIDOWED	2.3	K/uL	2.21	m/uL	0.13	K/uL	0.74	K/uL	79.5	K/uL	7.1	g/dL	23.7	%	22.2	%	NULL	NULL	NULL	NULL	NULL	NULL	140	mEq/L	4.2	mEq/L	8.7	mg/dL	106	mEq/L	109	mg/dL	NULL	NULL	11	mEq/L	NULL	NULL	NULL	NULL	NULL	NULL
10883477	28724363	80	0	OTHER	Medicare	English	NULL	8.1	K/uL	4.57	m/uL	NULL	NULL	NULL	NULL	197	K/uL	14.3	g/dL	13.3	%	46.3	%	3.7	g/dL	NULL	NULL	NULL	NULL	139	mEq/L	4.6	mEq/L	9.6	mg/dL	102	mEq/L	102	mg/dL	NULL	NULL	10	mEq/L	NULL	NULL	NULL	NULL	NULL	NULL
10887653	27225287	76	1	WHITE	Medicare	English	MARRIED	14.7	K/uL	3.36	m/uL	13.05	K/uL	0.9	K/uL	251	K/uL	10.2	g/dL	13.1	%	30	%	3.4	g/dL	NULL	NULL	NULL	NULL	132	mEq/L	4.4	mEq/L	10.1	mg/dL	88	mEq/L	808	mg/dL	NULL	NULL	21	mEq/L	7.43	units	49	mm Hg	39.57	mm Hg
10892605	23251591	69	0	WHITE	Medicare	English	SINGLE	12.2	K/uL	4.52	m/uL	NULL	NULL	NULL	NULL	279	K/uL	13.5	g/dL	13.2	%	40.7	%	4.2	g/dL	NULL	NULL	NULL	NULL	136	mEq/L	3.7	mEq/L	9.4	mg/dL	101	mEq/L	229	mg/dL	8.8	%	13	mEq/L	NULL	NULL	NULL	NULL	NULL	NULL
10893223	20685360	70	0	WHITE - OTHER EUROPEAN	Medicare	English	MARRIED	6.2	K/uL	3.91	m/uL	NULL	NULL	NULL	NULL	92	K/uL	11.4	g/dL	14	%	35.5	%	3.7	g/dL	NULL	NULL	NULL	NULL	138	mEq/L	4	mEq/L	NULL	NULL	103	mEq/L	148	mg/dL	6.3	%	14	mEq/L	7.37	units	46	mm Hg	174	mm Hg
10896886	23071274	69	1	WHITE	Medicare	English	DIVORCED	12	K/uL	4.22	m/uL	NULL	NULL	NULL	NULL	199	K/uL	13.6	g/dL	13.2	%	40.1	%	NULL	NULL	NULL	NULL	NULL	NULL	134	mEq/L	4.1	mEq/L	NULL	NULL	94	mEq/L	210	mg/dL	8.2	%	13	mEq/L	NULL	NULL	NULL	NULL	NULL	NULL
10899464	24549479	67	1	UNABLE TO OBTAIN	Private	English	MARRIED	10.4	K/uL	3.95	m/uL	7.17	K/uL	2.18	K/uL	221	K/uL	12.5	g/dL	13.7	%	38	%	3.7	g/dL	NULL	NULL	NULL	NULL	137	mEq/L	4	mEq/L	8.7	mg/dL	105	mEq/L	106	mg/dL	6.8	%	11	mEq/L	NULL	NULL	NULL	NULL	NULL	NULL
10904305	20882029	88	0	WHITE	Medicare	English	WIDOWED	23.3	K/uL	3.24	m/uL	NULL	NULL	NULL	NULL	274	K/uL	9.9	g/dL	16.1	%	34.2	%	NULL	NULL	NULL	NULL	NULL	NULL	156.5	mEq/L	2.7	mEq/L	9.73	mg/dL	115	mEq/L	867.33	mg/dL	NULL	NULL	8.5	mEq/L	NULL	NULL	NULL	NULL	NULL	NULL
10907151	27958762	75	0	WHITE	Medicare	English	MARRIED	7.83	K/uL	4.19	m/uL	NULL	NULL	NULL	NULL	221	K/uL	11.67	g/dL	14.67	%	37.43	%	2.9	g/dL	NULL	NULL	NULL	NULL	146.33	mEq/L	3.67	mEq/L	7.93	mg/dL	112	mEq/L	215	mg/dL	NULL	NULL	15	mEq/L	7.4	units	38	mm Hg	90	mm Hg
10916451	29428629	69	0	HISPANIC/LATINO - PUERTO RICAN	Medicare	Spanish	SINGLE	6	K/uL	3.63	m/uL	NULL	NULL	NULL	NULL	111	K/uL	10.4	g/dL	17.1	%	33	%	NULL	NULL	NULL	NULL	NULL	NULL	138	mEq/L	5.4	mEq/L	9.95	mg/dL	96	mEq/L	110.5	mg/dL	NULL	NULL	16	mEq/L	NULL	NULL	NULL	NULL	NULL	NULL
10921462	21457974	58	0	WHITE	Medicare	English	DIVORCED	12.93	K/uL	2.97	m/uL	NULL	NULL	NULL	NULL	234.67	K/uL	8.8	g/dL	14.43	%	26.77	%	NULL	NULL	NULL	NULL	NULL	NULL	130.33	mEq/L	4.13	mEq/L	7.17	mg/dL	100	mEq/L	208.67	mg/dL	NULL	NULL	17.67	mEq/L	7.31	units	33.25	mm Hg	191.25	mm Hg
10934210	23446705	85	0	WHITE	Medicare	English	WIDOWED	4.4	K/uL	3.27	m/uL	NULL	NULL	NULL	NULL	238	K/uL	10.9	g/dL	14.7	%	35.5	%	NULL	NULL	NULL	NULL	NULL	NULL	144	mEq/L	4.2	mEq/L	9.4	mg/dL	104	mEq/L	110	mg/dL	NULL	NULL	13	mEq/L	NULL	NULL	NULL	NULL	NULL	NULL
10941013	23594837	88	0	BLACK/AFRICAN AMERICAN	Medicare	English	SINGLE	9.3	K/uL	3.3	m/uL	NULL	NULL	NULL	NULL	251.33	K/uL	7.27	g/dL	19.57	%	25.83	%	NULL	NULL	NULL	NULL	NULL	NULL	145	mEq/L	5.65	mEq/L	9.2	mg/dL	100	mEq/L	175.5	mg/dL	NULL	NULL	10	mEq/L	7.35	units	68.5	mm Hg	44.75	mm Hg
10942045	24519953	78	1	WHITE	Medicare	English	MARRIED	NULL	NULL	NULL	NULL	NULL	NULL	NULL	NULL	NULL	NULL	NULL	NULL	NULL	NULL	NULL	NULL	NULL	NULL	NULL	NULL	NULL	NULL	NULL	NULL	NULL	NULL	NULL	NULL	NULL	NULL	NULL	NULL	NULL	NULL	NULL	NULL	NULL	NULL	NULL	NULL	NULL	NULL
10943097	25582886	58	0	WHITE	Private	English	MARRIED	10.2	K/uL	4.01	m/uL	NULL	NULL	NULL	NULL	250	K/uL	11.6	g/dL	14	%	36	%	NULL	NULL	NULL	NULL	NULL	NULL	131	mEq/L	3.2	mEq/L	9.1	mg/dL	88	mEq/L	326	mg/dL	NULL	NULL	16	mEq/L	NULL	NULL	NULL	NULL	NULL	NULL
10955059	20092866	57	0	WHITE	Private	English	MARRIED	6.85	K/uL	2.29	m/uL	NULL	NULL	NULL	NULL	193	K/uL	7.15	g/dL	25.2	%	22.9	%	3.1	g/dL	NULL	NULL	NULL	NULL	143	mEq/L	3.7	mEq/L	8.3	mg/dL	108	mEq/L	124	mg/dL	NULL	NULL	11	mEq/L	NULL	NULL	NULL	NULL	NULL	NULL
10961177	20455446	59	1	WHITE	Medicare	English	SINGLE	6.87	K/uL	4.44	m/uL	5.38	K/uL	0.83	K/uL	205	K/uL	13.47	g/dL	14.9	%	40.93	%	2.95	g/dL	NULL	NULL	NULL	NULL	131	mEq/L	3.35	mEq/L	7.6	mg/dL	90.5	mEq/L	150.5	mg/dL	NULL	NULL	10.5	mEq/L	7.44	units	48	mm Hg	53	mm Hg
10961954	27466760	59	1	OTHER	Medicare	Kabuverdianu	DIVORCED	14.4	K/uL	5.14	m/uL	NULL	NULL	NULL	NULL	360	K/uL	11.3	g/dL	19	%	39.7	%	NULL	NULL	NULL	NULL	NULL	NULL	138	mEq/L	4.3	mEq/L	9.1	mg/dL	93	mEq/L	289	mg/dL	NULL	NULL	18	mEq/L	NULL	NULL	NULL	NULL	NULL	NULL
10961959	22339341	84	0	WHITE	Medicare	English	WIDOWED	5.4	K/uL	4.18	m/uL	NULL	NULL	NULL	NULL	194	K/uL	11.8	g/dL	17.1	%	38.2	%	3.7	g/dL	NULL	NULL	NULL	NULL	144	mEq/L	4.5	mEq/L	8.85	mg/dL	109.5	mEq/L	103.5	mg/dL	NULL	NULL	13.5	mEq/L	NULL	NULL	NULL	NULL	NULL	NULL
10967289	23634911	67	1	HISPANIC/LATINO - PUERTO RICAN	Medicare	English	MARRIED	8.6	K/uL	4.01	m/uL	NULL	NULL	NULL	NULL	184	K/uL	11.8	g/dL	13.5	%	34.9	%	NULL	NULL	NULL	NULL	NULL	NULL	127.33	mEq/L	5.3	mEq/L	8.63	mg/dL	91.33	mEq/L	193	mg/dL	NULL	NULL	16.67	mEq/L	NULL	NULL	NULL	NULL	NULL	NULL
10967745	21458886	58	1	UNKNOWN	Medicare	English	NULL	14.93	K/uL	4.02	m/uL	NULL	NULL	NULL	NULL	203.67	K/uL	11.07	g/dL	15.83	%	34.27	%	2.8	g/dL	NULL	NULL	NULL	NULL	130.67	mEq/L	4.8	mEq/L	7.7	mg/dL	95	mEq/L	165	mg/dL	NULL	NULL	14.67	mEq/L	7.41	units	36.5	mm Hg	144.92	mm Hg
10976647	29833305	77	1	WHITE	Medicare	English	WIDOWED	18.33	K/uL	4.61	m/uL	19.78	K/uL	0.4	K/uL	181.33	K/uL	13.53	g/dL	13.2	%	40.7	%	NULL	NULL	NULL	NULL	NULL	NULL	134.67	mEq/L	3.8	mEq/L	8.8	mg/dL	94.67	mEq/L	315	mg/dL	NULL	NULL	20.67	mEq/L	7.48	units	34	mm Hg	48.5	mm Hg
10978933	20608859	60	0	BLACK/AFRICAN	Private	English	SINGLE	10.35	K/uL	2.96	m/uL	NULL	NULL	NULL	NULL	315.5	K/uL	8.8	g/dL	16.35	%	28.15	%	NULL	NULL	NULL	NULL	NULL	NULL	142	mEq/L	4.9	mEq/L	9.5	mg/dL	98	mEq/L	95	mg/dL	NULL	NULL	19	mEq/L	NULL	NULL	NULL	NULL	NULL	NULL
10985820	24198901	66	0	WHITE	Medicare	English	SINGLE	5.9	K/uL	3.15	m/uL	NULL	NULL	NULL	NULL	202	K/uL	9.9	g/dL	12	%	30	%	4	g/dL	NULL	NULL	NULL	NULL	137	mEq/L	3.95	mEq/L	9.6	mg/dL	92	mEq/L	326	mg/dL	7.4	%	11	mEq/L	7.3	units	71	mm Hg	77	mm Hg
10986360	25710910	75	0	WHITE - OTHER EUROPEAN	Medicare	Modern Greek (1453-)	DIVORCED	NULL	NULL	NULL	NULL	NULL	NULL	NULL	NULL	NULL	NULL	NULL	NULL	NULL	NULL	NULL	NULL	NULL	NULL	NULL	NULL	NULL	NULL	NULL	NULL	NULL	NULL	NULL	NULL	NULL	NULL	NULL	NULL	NULL	NULL	NULL	NULL	NULL	NULL	NULL	NULL	NULL	NULL
10989402	20618037	82	0	UNKNOWN	Private	English	SINGLE	NULL	NULL	NULL	NULL	NULL	NULL	NULL	NULL	NULL	NULL	NULL	NULL	NULL	NULL	NULL	NULL	NULL	NULL	NULL	NULL	NULL	NULL	NULL	NULL	NULL	NULL	NULL	NULL	NULL	NULL	NULL	NULL	NULL	NULL	NULL	NULL	NULL	NULL	NULL	NULL	NULL	NULL
10990234	27526376	77	1	WHITE - OTHER EUROPEAN	Medicare	English	MARRIED	9.4	K/uL	4.47	m/uL	NULL	NULL	NULL	NULL	164	K/uL	11.3	g/dL	16.9	%	36.8	%	3.5	g/dL	NULL	NULL	NULL	NULL	139	mEq/L	3.8	mEq/L	8.7	mg/dL	101	mEq/L	271	mg/dL	NULL	NULL	19	mEq/L	NULL	NULL	NULL	NULL	NULL	NULL
10996206	26098963	67	0	PATIENT DECLINED TO ANSWER	Medicare	English	SINGLE	11.4	K/uL	3.28	m/uL	6.33	K/uL	4.95	K/uL	229.67	K/uL	10.07	g/dL	13.17	%	29.7	%	4	g/dL	2.85	g/dL	6.85	g/dL	140	mEq/L	3.7	mEq/L	9.4	mg/dL	110	mEq/L	152	mg/dL	NULL	NULL	12	mEq/L	7.28	units	45.11	mm Hg	208.67	mm Hg
11000360	25315023	69	1	BLACK/AFRICAN AMERICAN	Medicare	English	SINGLE	10.9	K/uL	4.04	m/uL	9.28	K/uL	0.61	K/uL	463.5	K/uL	10.7	g/dL	15.65	%	36.25	%	2.7	g/dL	NULL	NULL	NULL	NULL	145	mEq/L	5.27	mEq/L	9.13	mg/dL	104	mEq/L	361.67	mg/dL	NULL	NULL	17.67	mEq/L	7.28	units	52.25	mm Hg	118.25	mm Hg
11004684	24653032	68	0	WHITE	Private	English	MARRIED	9.7	K/uL	3.46	m/uL	NULL	NULL	NULL	NULL	276	K/uL	8	g/dL	17.5	%	28.2	%	3.8	g/dL	NULL	NULL	NULL	NULL	139	mEq/L	4.4	mEq/L	NULL	NULL	97	mEq/L	153	mg/dL	7.5	%	16	mEq/L	NULL	NULL	NULL	NULL	NULL	NULL
11016931	24826446	83	0	WHITE	Medicaid	English	DIVORCED	4.85	K/uL	2.28	m/uL	3.23	K/uL	1.19	K/uL	89.5	K/uL	7.65	g/dL	14.6	%	25.15	%	NULL	NULL	NULL	NULL	NULL	NULL	138	mEq/L	5.25	mEq/L	9.15	mg/dL	96.5	mEq/L	132	mg/dL	NULL	NULL	11	mEq/L	7.35	units	55.67	mm Hg	68.67	mm Hg
11022333	23667676	79	1	WHITE	Medicare	English	MARRIED	NULL	NULL	NULL	NULL	NULL	NULL	NULL	NULL	NULL	NULL	NULL	NULL	NULL	NULL	NULL	NULL	NULL	NULL	NULL	NULL	NULL	NULL	NULL	NULL	NULL	NULL	NULL	NULL	NULL	NULL	NULL	NULL	NULL	NULL	NULL	NULL	NULL	NULL	NULL	NULL	NULL	NULL
11035340	27929224	88	0	BLACK/AFRICAN AMERICAN	Medicaid	English	SINGLE	NULL	NULL	NULL	NULL	NULL	NULL	NULL	NULL	NULL	NULL	NULL	NULL	NULL	NULL	NULL	NULL	NULL	NULL	NULL	NULL	NULL	NULL	NULL	NULL	NULL	NULL	NULL	NULL	NULL	NULL	NULL	NULL	NULL	NULL	NULL	NULL	NULL	NULL	NULL	NULL	NULL	NULL
11043249	26287621	86	0	WHITE	Medicare	English	WIDOWED	NULL	NULL	NULL	NULL	NULL	NULL	NULL	NULL	NULL	NULL	NULL	NULL	NULL	NULL	NULL	NULL	NULL	NULL	NULL	NULL	NULL	NULL	NULL	NULL	NULL	NULL	NULL	NULL	NULL	NULL	NULL	NULL	NULL	NULL	NULL	NULL	NULL	NULL	NULL	NULL	NULL	NULL
11047392	26947527	89	0	WHITE	Medicare	English	MARRIED	5.1	K/uL	3.89	m/uL	NULL	NULL	NULL	NULL	178.75	K/uL	10.58	g/dL	15.15	%	34.28	%	NULL	NULL	NULL	NULL	NULL	NULL	143.67	mEq/L	4.4	mEq/L	9.3	mg/dL	105	mEq/L	166.67	mg/dL	NULL	NULL	14	mEq/L	NULL	NULL	NULL	NULL	NULL	NULL
11047706	25525531	71	0	WHITE	Medicare	English	MARRIED	9.85	K/uL	3.17	m/uL	NULL	NULL	NULL	NULL	237	K/uL	9.95	g/dL	14.2	%	33.6	%	NULL	NULL	NULL	NULL	NULL	NULL	142.5	mEq/L	5.2	mEq/L	8	mg/dL	104.5	mEq/L	194	mg/dL	NULL	NULL	11	mEq/L	NULL	NULL	NULL	NULL	NULL	NULL
11051942	26447909	50	0	UNKNOWN	Medicaid	Spanish	NULL	8.4	K/uL	2.68	m/uL	NULL	NULL	NULL	NULL	159	K/uL	8.2	g/dL	15	%	29.8	%	NULL	NULL	NULL	NULL	NULL	NULL	145	mEq/L	3.7	mEq/L	8.2	mg/dL	101	mEq/L	133	mg/dL	NULL	NULL	10	mEq/L	7.46	units	54.5	mm Hg	57.5	mm Hg
11059196	23760958	82	0	WHITE	Medicare	English	SINGLE	16	K/uL	3.96	m/uL	NULL	NULL	NULL	NULL	180	K/uL	11.2	g/dL	15.1	%	35.6	%	NULL	NULL	NULL	NULL	NULL	NULL	136.5	mEq/L	5.5	mEq/L	9.4	mg/dL	100	mEq/L	128	mg/dL	NULL	NULL	21.5	mEq/L	NULL	NULL	NULL	NULL	NULL	NULL
11060954	28046576	80	0	WHITE	Other	English	MARRIED	5.4	K/uL	3.77	m/uL	NULL	NULL	NULL	NULL	158	K/uL	11.4	g/dL	13.7	%	35.1	%	NULL	NULL	NULL	NULL	NULL	NULL	140	mEq/L	3.6	mEq/L	8.9	mg/dL	103	mEq/L	104	mg/dL	NULL	NULL	12	mEq/L	NULL	NULL	NULL	NULL	NULL	NULL
11062873	21014248	91	1	UNKNOWN	Medicare	English	NULL	26.35	K/uL	2.86	m/uL	NULL	NULL	NULL	NULL	548	K/uL	8.45	g/dL	17.25	%	27.95	%	3.1	g/dL	NULL	NULL	NULL	NULL	140	mEq/L	4.9	mEq/L	9.15	mg/dL	100.5	mEq/L	284	mg/dL	NULL	NULL	19.5	mEq/L	7.3	units	56.5	mm Hg	50	mm Hg
11063695	25095838	82	0	WHITE	Medicare	English	WIDOWED	NULL	NULL	NULL	NULL	NULL	NULL	NULL	NULL	NULL	NULL	NULL	NULL	NULL	NULL	NULL	NULL	NULL	NULL	NULL	NULL	NULL	NULL	NULL	NULL	NULL	NULL	NULL	NULL	NULL	NULL	NULL	NULL	NULL	NULL	NULL	NULL	NULL	NULL	NULL	NULL	NULL	NULL
11068342	21038956	67	0	WHITE	Medicare	English	SINGLE	NULL	NULL	NULL	NULL	NULL	NULL	NULL	NULL	NULL	NULL	NULL	NULL	NULL	NULL	NULL	NULL	NULL	NULL	NULL	NULL	NULL	NULL	NULL	NULL	NULL	NULL	NULL	NULL	NULL	NULL	NULL	NULL	NULL	NULL	NULL	NULL	NULL	NULL	NULL	NULL	NULL	NULL
11073972	22971868	74	1	WHITE	Medicare	English	MARRIED	10	K/uL	3.43	m/uL	NULL	NULL	NULL	NULL	257	K/uL	9.2	g/dL	16	%	30.7	%	NULL	NULL	NULL	NULL	NULL	NULL	142.5	mEq/L	5.6	mEq/L	9.05	mg/dL	106	mEq/L	143	mg/dL	NULL	NULL	17	mEq/L	7.36	units	NULL	NULL	NULL	NULL
11084759	23329112	76	0	WHITE	Medicare	English	DIVORCED	7.55	K/uL	3.83	m/uL	NULL	NULL	NULL	NULL	226	K/uL	12.4	g/dL	13.35	%	38.4	%	NULL	NULL	NULL	NULL	NULL	NULL	134	mEq/L	4.25	mEq/L	9.3	mg/dL	99.5	mEq/L	214.5	mg/dL	NULL	NULL	9	mEq/L	NULL	NULL	NULL	NULL	NULL	NULL
11084839	29732843	63	0	BLACK/AFRICAN AMERICAN	Medicare	English	SINGLE	8.3	K/uL	4.32	m/uL	NULL	NULL	NULL	NULL	137	K/uL	12.9	g/dL	13.5	%	38.7	%	3.6	g/dL	NULL	NULL	NULL	NULL	142	mEq/L	3.2	mEq/L	8.8	mg/dL	106	mEq/L	249	mg/dL	NULL	NULL	14	mEq/L	NULL	NULL	NULL	NULL	NULL	NULL
11091689	24574089	79	0	WHITE	Medicare	English	SINGLE	7.4	K/uL	3.35	m/uL	NULL	NULL	NULL	NULL	406	K/uL	9	g/dL	19.5	%	27.8	%	3.1	g/dL	NULL	NULL	NULL	NULL	141	mEq/L	4	mEq/L	NULL	NULL	104	mEq/L	75	mg/dL	NULL	NULL	14	mEq/L	NULL	NULL	NULL	NULL	NULL	NULL
11103850	28627810	73	1	WHITE	Medicare	English	WIDOWED	20.1	K/uL	4.59	m/uL	NULL	NULL	NULL	NULL	217	K/uL	13.85	g/dL	14.25	%	43.9	%	NULL	NULL	NULL	NULL	NULL	NULL	142	mEq/L	4.15	mEq/L	8	mg/dL	105	mEq/L	150	mg/dL	NULL	NULL	13	mEq/L	7.29	units	58.25	mm Hg	122	mm Hg
11110258	25600757	74	1	WHITE	Medicare	English	MARRIED	4.7	K/uL	2.67	m/uL	NULL	NULL	NULL	NULL	69	K/uL	8.7	g/dL	18.2	%	27.9	%	NULL	NULL	NULL	NULL	NULL	NULL	141.5	mEq/L	3.35	mEq/L	9.45	mg/dL	92	mEq/L	207.5	mg/dL	NULL	NULL	11	mEq/L	NULL	NULL	NULL	NULL	NULL	NULL
11124605	27637817	70	1	WHITE	Private	English	MARRIED	11.2	K/uL	4.83	m/uL	NULL	NULL	NULL	NULL	159.5	K/uL	14.6	g/dL	13.25	%	42.25	%	NULL	NULL	NULL	NULL	NULL	NULL	140.67	mEq/L	4.1	mEq/L	9.27	mg/dL	96.67	mEq/L	241	mg/dL	NULL	NULL	14	mEq/L	NULL	NULL	NULL	NULL	NULL	NULL
11126304	25522782	79	0	WHITE	Medicare	English	SINGLE	NULL	NULL	NULL	NULL	NULL	NULL	NULL	NULL	NULL	NULL	NULL	NULL	NULL	NULL	NULL	NULL	NULL	NULL	NULL	NULL	NULL	NULL	NULL	NULL	NULL	NULL	NULL	NULL	NULL	NULL	NULL	NULL	NULL	NULL	NULL	NULL	NULL	NULL	NULL	NULL	NULL	NULL
11127127	27797071	91	0	UNKNOWN	Medicaid	Portuguese	NULL	17.85	K/uL	2.66	m/uL	16.98	K/uL	0.72	K/uL	192	K/uL	8.15	g/dL	19.3	%	25.9	%	2.8	g/dL	NULL	NULL	NULL	NULL	138	mEq/L	4.2	mEq/L	8	mg/dL	99	mEq/L	250	mg/dL	4.9	%	19	mEq/L	7.36	units	40	mm Hg	59	mm Hg
11128226	22980917	72	0	WHITE	Medicare	English	MARRIED	11.4	K/uL	3.38	m/uL	NULL	NULL	NULL	NULL	181	K/uL	9.6	g/dL	14.6	%	30.3	%	NULL	NULL	NULL	NULL	NULL	NULL	139	mEq/L	3.4	mEq/L	8.7	mg/dL	95	mEq/L	122	mg/dL	NULL	NULL	15	mEq/L	NULL	NULL	NULL	NULL	NULL	NULL
11129360	22082997	60	0	WHITE	Medicaid	English	MARRIED	6.2	K/uL	4.5	m/uL	NULL	NULL	NULL	NULL	149.5	K/uL	11.9	g/dL	14.3	%	37.6	%	NULL	NULL	NULL	NULL	NULL	NULL	135	mEq/L	3.9	mEq/L	9.4	mg/dL	100	mEq/L	195	mg/dL	8.4	%	15	mEq/L	NULL	NULL	NULL	NULL	NULL	NULL
11135301	23552501	47	0	WHITE	Medicare	English	SINGLE	14	K/uL	3.64	m/uL	NULL	NULL	NULL	NULL	191	K/uL	12.3	g/dL	11.9	%	34.1	%	NULL	NULL	NULL	NULL	NULL	NULL	135.14	mEq/L	3.8	mEq/L	8.14	mg/dL	106.14	mEq/L	221	mg/dL	NULL	NULL	17.86	mEq/L	7.26	units	26.38	mm Hg	49.5	mm Hg
11138328	24279039	89	0	UNKNOWN	Medicare	English	NULL	10.75	K/uL	4.43	m/uL	7.8	K/uL	1.92	K/uL	287.5	K/uL	11.8	g/dL	15.4	%	37.35	%	3.8	g/dL	2.5	g/dL	6.3	g/dL	145	mEq/L	3.7	mEq/L	9	mg/dL	103	mEq/L	123.5	mg/dL	NULL	NULL	14.5	mEq/L	NULL	NULL	NULL	NULL	NULL	NULL
11153253	29764490	73	1	WHITE	Medicaid	English	SINGLE	NULL	NULL	NULL	NULL	NULL	NULL	NULL	NULL	NULL	NULL	NULL	NULL	NULL	NULL	NULL	NULL	NULL	NULL	NULL	NULL	NULL	NULL	NULL	NULL	NULL	NULL	NULL	NULL	NULL	NULL	NULL	NULL	NULL	NULL	NULL	NULL	NULL	NULL	NULL	NULL	NULL	NULL
11157563	24112275	56	1	BLACK/AFRICAN AMERICAN	Other	English	SINGLE	6.4	K/uL	3.41	m/uL	NULL	NULL	NULL	NULL	224	K/uL	9.6	g/dL	16.2	%	31.4	%	NULL	NULL	NULL	NULL	NULL	NULL	137	mEq/L	6.3	mEq/L	9.2	mg/dL	95	mEq/L	271	mg/dL	NULL	NULL	14	mEq/L	NULL	NULL	NULL	NULL	NULL	NULL
11170691	29259161	78	0	WHITE	Medicare	English	WIDOWED	18.9	K/uL	3.83	m/uL	16.85	K/uL	0.72	K/uL	157.5	K/uL	13.1	g/dL	12.25	%	37.5	%	3.8	g/dL	NULL	NULL	NULL	NULL	136	mEq/L	4.4	mEq/L	9.05	mg/dL	99.33	mEq/L	208.67	mg/dL	NULL	NULL	14.67	mEq/L	7.43	units	36.5	mm Hg	42.5	mm Hg
11185907	21393363	79	0	WHITE	Medicare	English	MARRIED	13.6	K/uL	3.89	m/uL	11.86	K/uL	0.56	K/uL	239	K/uL	11.6	g/dL	13.7	%	36.6	%	NULL	NULL	NULL	NULL	NULL	NULL	136	mEq/L	5.15	mEq/L	8.65	mg/dL	95	mEq/L	268.5	mg/dL	NULL	NULL	14	mEq/L	7.29	units	76	mm Hg	73	mm Hg
11189408	22570632	76	0	BLACK/AFRICAN AMERICAN	Medicare	English	WIDOWED	5	K/uL	3.02	m/uL	NULL	NULL	NULL	NULL	174	K/uL	8.1	g/dL	15.6	%	27.1	%	NULL	NULL	NULL	NULL	NULL	NULL	139.5	mEq/L	4.7	mEq/L	9.4	mg/dL	96	mEq/L	163.5	mg/dL	NULL	NULL	9	mEq/L	NULL	NULL	NULL	NULL	NULL	NULL
11196453	26457386	57	0	BLACK/AFRICAN AMERICAN	Medicaid	English	SINGLE	7	K/uL	3.94	m/uL	5.01	K/uL	1.52	K/uL	339	K/uL	12.2	g/dL	11.1	%	36.9	%	NULL	NULL	NULL	NULL	NULL	NULL	135	mEq/L	5.1	mEq/L	NULL	NULL	104	mEq/L	625	mg/dL	NULL	NULL	9	mEq/L	7.28	units	53	mm Hg	22	mm Hg
11206298	26561400	82	0	OTHER	Medicare	English	WIDOWED	11.95	K/uL	3.65	m/uL	NULL	NULL	NULL	NULL	315.5	K/uL	9.2	g/dL	17.3	%	31.7	%	NULL	NULL	NULL	NULL	NULL	NULL	144.5	mEq/L	4.35	mEq/L	8.55	mg/dL	99	mEq/L	114.5	mg/dL	5.6	%	11	mEq/L	NULL	NULL	NULL	NULL	NULL	NULL
11210025	24148677	66	0	WHITE	Medicare	English	SINGLE	8.4	K/uL	4.26	m/uL	NULL	NULL	NULL	NULL	196	K/uL	12.3	g/dL	14.4	%	38.8	%	NULL	NULL	NULL	NULL	NULL	NULL	141	mEq/L	3.8	mEq/L	9.1	mg/dL	106	mEq/L	123	mg/dL	5.6	%	11	mEq/L	NULL	NULL	NULL	NULL	NULL	NULL
11213229	29691872	91	1	WHITE	Medicare	English	WIDOWED	20.3	K/uL	3.84	m/uL	NULL	NULL	NULL	NULL	183	K/uL	12.1	g/dL	13.1	%	35.5	%	3	g/dL	NULL	NULL	NULL	NULL	136	mEq/L	4.7	mEq/L	8.2	mg/dL	99	mEq/L	198	mg/dL	NULL	NULL	18	mEq/L	NULL	NULL	NULL	NULL	NULL	NULL
11214845	28522779	66	1	WHITE	Medicare	English	MARRIED	9.03	K/uL	2.59	m/uL	NULL	NULL	NULL	NULL	103.67	K/uL	7.7	g/dL	14.57	%	22.3	%	NULL	NULL	NULL	NULL	NULL	NULL	136.5	mEq/L	3.9	mEq/L	7.7	mg/dL	107.5	mEq/L	156.5	mg/dL	NULL	NULL	13.5	mEq/L	NULL	NULL	NULL	NULL	NULL	NULL
11216718	29293952	89	1	UNKNOWN	Medicare	English	MARRIED	5	K/uL	4.18	m/uL	NULL	NULL	NULL	NULL	137	K/uL	12.9	g/dL	14.6	%	41.3	%	4.1	g/dL	NULL	NULL	NULL	NULL	141	mEq/L	4.45	mEq/L	9.2	mg/dL	98.5	mEq/L	113	mg/dL	6.6	%	13	mEq/L	NULL	NULL	NULL	NULL	NULL	NULL
11227592	28332834	68	0	WHITE	Medicare	English	MARRIED	6.7	K/uL	3.63	m/uL	NULL	NULL	NULL	NULL	340	K/uL	11.1	g/dL	12.9	%	33.2	%	NULL	NULL	NULL	NULL	NULL	NULL	143	mEq/L	4	mEq/L	8.6	mg/dL	103	mEq/L	156	mg/dL	9.1	%	13	mEq/L	NULL	NULL	NULL	NULL	NULL	NULL
11237063	22205833	81	1	WHITE	Medicare	English	MARRIED	10.05	K/uL	3.42	m/uL	7.2	K/uL	1.93	K/uL	186.5	K/uL	10.3	g/dL	13.95	%	33.3	%	NULL	NULL	NULL	NULL	NULL	NULL	141.5	mEq/L	4.15	mEq/L	9.55	mg/dL	100.5	mEq/L	95	mg/dL	5.6	%	12.5	mEq/L	NULL	NULL	NULL	NULL	NULL	NULL
11237954	22394595	80	0	UNKNOWN	Medicare	English	NULL	8.3	K/uL	3.54	m/uL	NULL	NULL	NULL	NULL	231	K/uL	11.6	g/dL	15.3	%	37.6	%	NULL	NULL	NULL	NULL	NULL	NULL	145	mEq/L	4.2	mEq/L	8.8	mg/dL	100	mEq/L	78	mg/dL	NULL	NULL	14	mEq/L	NULL	NULL	NULL	NULL	NULL	NULL
11242982	22721642	59	0	WHITE	Private	English	MARRIED	26.3	K/uL	2.81	m/uL	NULL	NULL	NULL	NULL	115	K/uL	8.4	g/dL	15.37	%	25.67	%	2.95	g/dL	NULL	NULL	NULL	NULL	153	mEq/L	3.7	mEq/L	8.48	mg/dL	109.75	mEq/L	124.25	mg/dL	NULL	NULL	16.75	mEq/L	7.43	units	40.6	mm Hg	71.8	mm Hg
11249859	22943771	70	1	WHITE	Private	English	MARRIED	6.6	K/uL	4.41	m/uL	4.14	K/uL	1.66	K/uL	146	K/uL	14.1	g/dL	12.9	%	41.6	%	NULL	NULL	NULL	NULL	NULL	NULL	136	mEq/L	4.5	mEq/L	9.1	mg/dL	96	mEq/L	313	mg/dL	NULL	NULL	15	mEq/L	NULL	NULL	NULL	NULL	NULL	NULL
11264961	21641588	59	1	WHITE	Medicaid	English	SINGLE	7.73	K/uL	5.83	m/uL	NULL	NULL	NULL	NULL	198	K/uL	18.33	g/dL	17.2	%	57.6	%	NULL	NULL	NULL	NULL	NULL	NULL	134.67	mEq/L	4.5	mEq/L	8.53	mg/dL	91	mEq/L	114.67	mg/dL	6.3	%	5.67	mEq/L	7.37	units	68.67	mm Hg	63.67	mm Hg
11266704	24867991	57	1	WHITE	Medicaid	English	SINGLE	4.7	K/uL	4.55	m/uL	NULL	NULL	NULL	NULL	142	K/uL	13.2	g/dL	15.2	%	42.1	%	NULL	NULL	NULL	NULL	NULL	NULL	144	mEq/L	4.2	mEq/L	9.9	mg/dL	110	mEq/L	122	mg/dL	NULL	NULL	11	mEq/L	NULL	NULL	NULL	NULL	NULL	NULL
11269020	26923807	79	1	WHITE	Medicare	English	MARRIED	13.37	K/uL	3.6	m/uL	NULL	NULL	NULL	NULL	162.67	K/uL	11.07	g/dL	15.13	%	35.83	%	NULL	NULL	NULL	NULL	NULL	NULL	135.67	mEq/L	4.97	mEq/L	9.7	mg/dL	95	mEq/L	126.67	mg/dL	NULL	NULL	22.67	mEq/L	7.3	units	48	mm Hg	224	mm Hg
11271417	22997183	75	1	UNKNOWN	Medicare	English	NULL	22.95	K/uL	5.18	m/uL	20.83	K/uL	0.59	K/uL	183.5	K/uL	15.7	g/dL	13.95	%	50.55	%	NULL	NULL	NULL	NULL	NULL	NULL	141	mEq/L	4.1	mEq/L	10	mg/dL	90.5	mEq/L	169	mg/dL	NULL	NULL	16	mEq/L	7.4	units	67.25	mm Hg	32	mm Hg
11275870	28912415	73	1	PATIENT DECLINED TO ANSWER	Medicare	English	SINGLE	14.3	K/uL	4.51	m/uL	10.64	K/uL	2.08	K/uL	221	K/uL	12.7	g/dL	16.3	%	39.7	%	3.6	g/dL	NULL	NULL	NULL	NULL	138	mEq/L	4	mEq/L	NULL	NULL	100	mEq/L	NULL	NULL	NULL	NULL	15	mEq/L	NULL	NULL	NULL	NULL	NULL	NULL
11278219	23116684	61	0	WHITE	Private	English	MARRIED	NULL	NULL	NULL	NULL	NULL	NULL	NULL	NULL	NULL	NULL	NULL	NULL	NULL	NULL	NULL	NULL	NULL	NULL	NULL	NULL	NULL	NULL	NULL	NULL	NULL	NULL	NULL	NULL	NULL	NULL	NULL	NULL	NULL	NULL	NULL	NULL	7.41	units	40	mm Hg	63	mm Hg
11279181	22539785	57	1	BLACK/AFRICAN AMERICAN	Medicare	English	SINGLE	12.9	K/uL	3.89	m/uL	NULL	NULL	NULL	NULL	183	K/uL	11.6	g/dL	15.3	%	35.9	%	NULL	NULL	NULL	NULL	NULL	NULL	141	mEq/L	4.1	mEq/L	9.1	mg/dL	106	mEq/L	158	mg/dL	NULL	NULL	11	mEq/L	NULL	NULL	NULL	NULL	NULL	NULL
11279874	26684675	74	0	WHITE	Medicare	English	MARRIED	NULL	NULL	NULL	NULL	NULL	NULL	NULL	NULL	NULL	NULL	NULL	NULL	NULL	NULL	NULL	NULL	NULL	NULL	NULL	NULL	NULL	NULL	NULL	NULL	NULL	NULL	NULL	NULL	NULL	NULL	NULL	NULL	NULL	NULL	NULL	NULL	NULL	NULL	NULL	NULL	NULL	NULL
11280189	21079464	73	1	WHITE	Medicare	English	MARRIED	12.6	K/uL	4.42	m/uL	NULL	NULL	NULL	NULL	209	K/uL	10.8	g/dL	17.6	%	35.2	%	NULL	NULL	NULL	NULL	5.9	g/dL	141.5	mEq/L	3.7	mEq/L	9.05	mg/dL	95.5	mEq/L	127	mg/dL	NULL	NULL	14	mEq/L	NULL	NULL	NULL	NULL	NULL	NULL
11285884	23274792	85	1	WHITE	Medicare	English	SINGLE	5.6	K/uL	3.68	m/uL	NULL	NULL	NULL	NULL	280	K/uL	10.6	g/dL	21.2	%	34	%	NULL	NULL	NULL	NULL	NULL	NULL	143	mEq/L	4.45	mEq/L	8.55	mg/dL	105	mEq/L	92	mg/dL	5.7	%	18	mEq/L	NULL	NULL	NULL	NULL	NULL	NULL
11285963	24107840	87	1	WHITE	Medicare	English	WIDOWED	5.6	K/uL	4.43	m/uL	NULL	NULL	NULL	NULL	155	K/uL	9.7	g/dL	17.2	%	35.2	%	NULL	NULL	NULL	NULL	NULL	NULL	143	mEq/L	3.8	mEq/L	8.65	mg/dL	99.5	mEq/L	104	mg/dL	8.6	%	12	mEq/L	7.39	units	58	mm Hg	104	mm Hg
11303048	20541659	73	0	WHITE	Medicare	English	WIDOWED	10.7	K/uL	3.67	m/uL	NULL	NULL	NULL	NULL	239	K/uL	9.6	g/dL	21.5	%	34	%	NULL	NULL	NULL	NULL	NULL	NULL	144	mEq/L	3.45	mEq/L	8.45	mg/dL	93.5	mEq/L	145.5	mg/dL	NULL	NULL	8.5	mEq/L	7.38	units	80	mm Hg	37	mm Hg
11304475	22864119	80	0	OTHER	Medicare	Russian	MARRIED	7.9	K/uL	3.3	m/uL	NULL	NULL	NULL	NULL	305	K/uL	11	g/dL	14.1	%	33.1	%	NULL	NULL	NULL	NULL	NULL	NULL	136	mEq/L	4.5	mEq/L	9.7	mg/dL	100	mEq/L	178	mg/dL	NULL	NULL	11	mEq/L	NULL	NULL	NULL	NULL	NULL	NULL
11305460	29427567	66	1	UNABLE TO OBTAIN	Medicare	English	SINGLE	6.1	K/uL	4.24	m/uL	NULL	NULL	NULL	NULL	212.33	K/uL	7.57	g/dL	27.17	%	27.6	%	3.8	g/dL	NULL	NULL	NULL	NULL	139	mEq/L	3.95	mEq/L	10.3	mg/dL	107.5	mEq/L	88.5	mg/dL	8.2	%	9.5	mEq/L	NULL	NULL	NULL	NULL	NULL	NULL
11306247	28902346	70	0	WHITE	Medicaid	English	DIVORCED	28.4	K/uL	4.07	m/uL	NULL	NULL	NULL	NULL	261	K/uL	11.3	g/dL	16.3	%	34.9	%	NULL	NULL	NULL	NULL	NULL	NULL	138	mEq/L	3.9	mEq/L	8.1	mg/dL	106	mEq/L	110	mg/dL	NULL	NULL	14	mEq/L	NULL	NULL	NULL	NULL	NULL	NULL
11315488	20166987	86	1	WHITE	Medicare	English	MARRIED	6.7	K/uL	3.72	m/uL	NULL	NULL	NULL	NULL	221	K/uL	10.8	g/dL	14	%	35.9	%	3.8	g/dL	NULL	NULL	NULL	NULL	140	mEq/L	5.45	mEq/L	9.6	mg/dL	108	mEq/L	134	mg/dL	6	%	16	mEq/L	7.34	units	32	mm Hg	132	mm Hg
11316115	25671427	84	0	WHITE	Medicare	English	WIDOWED	NULL	NULL	NULL	NULL	NULL	NULL	NULL	NULL	NULL	NULL	NULL	NULL	NULL	NULL	NULL	NULL	NULL	NULL	NULL	NULL	NULL	NULL	NULL	NULL	NULL	NULL	NULL	NULL	NULL	NULL	NULL	NULL	NULL	NULL	NULL	NULL	NULL	NULL	NULL	NULL	NULL	NULL
11327487	21262828	68	1	WHITE	Medicare	English	MARRIED	5.6	K/uL	3.67	m/uL	NULL	NULL	NULL	NULL	103	K/uL	10.4	g/dL	16.1	%	32.7	%	3.5	g/dL	NULL	NULL	NULL	NULL	137	mEq/L	4.3	mEq/L	8.4	mg/dL	100	mEq/L	401	mg/dL	NULL	NULL	12	mEq/L	NULL	NULL	NULL	NULL	NULL	NULL
11332465	25222212	65	1	UNKNOWN	Medicare	English	NULL	16.55	K/uL	2.78	m/uL	14.2	K/uL	1.02	K/uL	477	K/uL	8.1	g/dL	14.5	%	24.7	%	NULL	NULL	NULL	NULL	NULL	NULL	143.5	mEq/L	4.05	mEq/L	9.2	mg/dL	96.5	mEq/L	171	mg/dL	NULL	NULL	16.5	mEq/L	7.46	units	44.5	mm Hg	36	mm Hg
11336838	27736973	72	0	UNKNOWN	Medicare	Portuguese	NULL	10.9	K/uL	2.69	m/uL	NULL	NULL	NULL	NULL	85.25	K/uL	7.53	g/dL	17.2	%	22.48	%	2.5	g/dL	NULL	NULL	NULL	NULL	118	mEq/L	4.75	mEq/L	7.85	mg/dL	85.5	mEq/L	160.5	mg/dL	NULL	NULL	12.5	mEq/L	NULL	NULL	NULL	NULL	NULL	NULL
11346472	29439172	56	1	WHITE	Medicare	English	SINGLE	18.2	K/uL	4.33	m/uL	16.41	K/uL	0.49	K/uL	329	K/uL	8.5	g/dL	22.3	%	32.2	%	NULL	NULL	NULL	NULL	NULL	NULL	138.33	mEq/L	4.8	mEq/L	8.73	mg/dL	97	mEq/L	201.33	mg/dL	6.5	%	14.33	mEq/L	7.4	units	48.5	mm Hg	82.5	mm Hg
11354733	24815479	78	0	WHITE	Medicare	English	DIVORCED	5.1	K/uL	3.64	m/uL	NULL	NULL	NULL	NULL	221	K/uL	9.5	g/dL	13.6	%	30.1	%	NULL	NULL	NULL	NULL	NULL	NULL	137	mEq/L	4.2	mEq/L	8.8	mg/dL	100	mEq/L	80	mg/dL	NULL	NULL	10	mEq/L	NULL	NULL	NULL	NULL	NULL	NULL
11358887	21245405	85	0	WHITE	Medicare	English	SINGLE	6.6	K/uL	4.67	m/uL	NULL	NULL	NULL	NULL	216	K/uL	14	g/dL	13	%	41.8	%	4.5	g/dL	NULL	NULL	7.2	g/dL	139	mEq/L	4.2	mEq/L	9.9	mg/dL	103	mEq/L	228	mg/dL	6.8	%	15	mEq/L	NULL	NULL	NULL	NULL	NULL	NULL
11366422	22947603	59	0	WHITE	Medicare	English	MARRIED	9.7	K/uL	3.4	m/uL	7.86	K/uL	1.16	K/uL	305	K/uL	8.4	g/dL	19.2	%	29	%	NULL	NULL	NULL	NULL	NULL	NULL	139	mEq/L	4.1	mEq/L	8.4	mg/dL	99	mEq/L	167	mg/dL	NULL	NULL	18	mEq/L	NULL	NULL	NULL	NULL	NULL	NULL
11370994	22801372	91	0	WHITE	Medicare	English	WIDOWED	3.7	K/uL	2.13	m/uL	0.04	K/uL	0.14	K/uL	25.33	K/uL	7.03	g/dL	17.03	%	20.2	%	2.4	g/dL	NULL	NULL	NULL	NULL	123.33	mEq/L	4.63	mEq/L	7.87	mg/dL	90.67	mEq/L	105.67	mg/dL	NULL	NULL	16.33	mEq/L	7.33	units	39	mm Hg	73.5	mm Hg
11371461	20674495	64	0	BLACK/AFRICAN AMERICAN	Medicare	English	SINGLE	8.6	K/uL	4.82	m/uL	NULL	NULL	NULL	NULL	206	K/uL	12.7	g/dL	14.8	%	41.7	%	4.1	g/dL	NULL	NULL	NULL	NULL	139	mEq/L	4.4	mEq/L	9.4	mg/dL	107	mEq/L	310	mg/dL	NULL	NULL	13	mEq/L	NULL	NULL	NULL	NULL	NULL	NULL
11383690	25006121	78	1	HISPANIC/LATINO - DOMINICAN	Medicaid	Spanish	SINGLE	7.4	K/uL	4.41	m/uL	NULL	NULL	NULL	NULL	180	K/uL	13.1	g/dL	16.5	%	42.9	%	NULL	NULL	NULL	NULL	NULL	NULL	140	mEq/L	4.4	mEq/L	8.9	mg/dL	101	mEq/L	76	mg/dL	6.4	%	12	mEq/L	NULL	NULL	NULL	NULL	NULL	NULL
11388315	22706620	69	1	WHITE	Medicare	English	MARRIED	5.9	K/uL	3.2	m/uL	NULL	NULL	NULL	NULL	37	K/uL	9	g/dL	15.4	%	27.4	%	NULL	NULL	NULL	NULL	NULL	NULL	133	mEq/L	3.35	mEq/L	7.85	mg/dL	97	mEq/L	207.5	mg/dL	NULL	NULL	14.5	mEq/L	NULL	NULL	NULL	NULL	NULL	NULL
11398457	25939648	62	1	HISPANIC/LATINO - PUERTO RICAN	Medicare	Spanish	DIVORCED	NULL	NULL	NULL	NULL	NULL	NULL	NULL	NULL	NULL	NULL	NULL	NULL	NULL	NULL	NULL	NULL	NULL	NULL	NULL	NULL	NULL	NULL	NULL	NULL	NULL	NULL	NULL	NULL	NULL	NULL	NULL	NULL	NULL	NULL	NULL	NULL	NULL	NULL	NULL	NULL	NULL	NULL
11401641	27443746	64	0	WHITE	NULL	English	DIVORCED	11.3	K/uL	4.49	m/uL	NULL	NULL	NULL	NULL	451	K/uL	12.9	g/dL	13.2	%	40.8	%	NULL	NULL	NULL	NULL	NULL	NULL	138	mEq/L	4.1	mEq/L	9.2	mg/dL	99	mEq/L	78	mg/dL	5.8	%	13	mEq/L	NULL	NULL	NULL	NULL	NULL	NULL
11408867	26260803	67	0	WHITE	Medicare	English	DIVORCED	9.1	K/uL	3.88	m/uL	5.81	K/uL	2.41	K/uL	259	K/uL	11.3	g/dL	16.3	%	37	%	NULL	NULL	NULL	NULL	NULL	NULL	138	mEq/L	4.4	mEq/L	8.9	mg/dL	98	mEq/L	114	mg/dL	7	%	11	mEq/L	NULL	NULL	NULL	NULL	NULL	NULL
11409057	21542445	59	0	WHITE	Medicare	English	DIVORCED	12.8	K/uL	3.49	m/uL	10.45	K/uL	0.46	K/uL	145.5	K/uL	11.2	g/dL	15.4	%	33.9	%	3	g/dL	NULL	NULL	NULL	NULL	133.5	mEq/L	4.4	mEq/L	7.35	mg/dL	100	mEq/L	199.5	mg/dL	NULL	NULL	9.5	mEq/L	NULL	NULL	NULL	NULL	NULL	NULL
11410426	27299736	68	1	UNKNOWN	Medicare	English	MARRIED	12.8	K/uL	3.67	m/uL	NULL	NULL	NULL	NULL	128	K/uL	11.5	g/dL	19.5	%	35.9	%	3.3	g/dL	NULL	NULL	NULL	NULL	137.67	mEq/L	4.6	mEq/L	8.57	mg/dL	99.67	mEq/L	162.67	mg/dL	NULL	NULL	16.33	mEq/L	7.42	units	34	mm Hg	165	mm Hg
11422164	23073545	89	0	NATIVE HAWAIIAN OR OTHER PACIFIC ISLANDER	Medicare	English	NULL	13.6	K/uL	4.77	m/uL	NULL	NULL	NULL	NULL	288	K/uL	14	g/dL	13.3	%	45.5	%	NULL	NULL	NULL	NULL	NULL	NULL	144	mEq/L	4.3	mEq/L	9.3	mg/dL	107	mEq/L	85	mg/dL	5.8	%	15	mEq/L	NULL	NULL	NULL	NULL	NULL	NULL
11436324	24532041	61	0	BLACK/AFRICAN AMERICAN	Medicare	English	SINGLE	13.1	K/uL	4.31	m/uL	NULL	NULL	NULL	NULL	250	K/uL	11.3	g/dL	17.2	%	35.5	%	NULL	NULL	NULL	NULL	NULL	NULL	148	mEq/L	3.1	mEq/L	8.7	mg/dL	106	mEq/L	129	mg/dL	NULL	NULL	21	mEq/L	7.42	units	46.57	mm Hg	167.57	mm Hg
11437939	24150635	78	0	WHITE	Medicare	English	SINGLE	15.1	K/uL	3.77	m/uL	NULL	NULL	NULL	NULL	229	K/uL	11.5	g/dL	12.9	%	36.6	%	NULL	NULL	NULL	NULL	NULL	NULL	142	mEq/L	4.7	mEq/L	NULL	NULL	105	mEq/L	134	mg/dL	NULL	NULL	13	mEq/L	NULL	NULL	NULL	NULL	NULL	NULL
11442864	26284091	75	1	WHITE	Medicare	English	MARRIED	24.85	K/uL	3.95	m/uL	NULL	NULL	NULL	NULL	224	K/uL	10.65	g/dL	18.7	%	36.35	%	NULL	NULL	NULL	NULL	NULL	NULL	139.5	mEq/L	4.5	mEq/L	7.65	mg/dL	101.5	mEq/L	154.5	mg/dL	NULL	NULL	14.5	mEq/L	NULL	NULL	NULL	NULL	NULL	NULL
11444595	29025891	65	1	WHITE	Medicare	English	MARRIED	7.8	K/uL	3.65	m/uL	NULL	NULL	NULL	NULL	188	K/uL	11.1	g/dL	15.4	%	34.4	%	3.2	g/dL	NULL	NULL	NULL	NULL	136	mEq/L	3.9	mEq/L	8.9	mg/dL	104	mEq/L	130	mg/dL	NULL	NULL	13	mEq/L	NULL	NULL	NULL	NULL	NULL	NULL
11449403	22556839	82	0	UNKNOWN	Medicare	English	WIDOWED	5.7	K/uL	2.75	m/uL	4.26	K/uL	0.7	K/uL	120	K/uL	7.1	g/dL	17.3	%	26.4	%	NULL	NULL	NULL	NULL	NULL	NULL	149	mEq/L	3.95	mEq/L	8.5	mg/dL	102	mEq/L	129	mg/dL	NULL	NULL	9	mEq/L	7.34	units	81.5	mm Hg	60.5	mm Hg
11449445	24717251	61	1	WHITE	Medicare	English	MARRIED	4.1	K/uL	2.62	m/uL	NULL	NULL	NULL	NULL	62.5	K/uL	7.1	g/dL	18.25	%	22.7	%	4.2	g/dL	NULL	NULL	NULL	NULL	141.5	mEq/L	3.6	mEq/L	8.45	mg/dL	109	mEq/L	154	mg/dL	NULL	NULL	24.5	mEq/L	7.29	units	29	mm Hg	66.5	mm Hg
11457685	20464940	72	0	OTHER	Medicare	English	WIDOWED	NULL	NULL	NULL	NULL	NULL	NULL	NULL	NULL	NULL	NULL	NULL	NULL	NULL	NULL	NULL	NULL	NULL	NULL	NULL	NULL	NULL	NULL	NULL	NULL	NULL	NULL	NULL	NULL	NULL	NULL	NULL	NULL	NULL	NULL	NULL	NULL	NULL	NULL	NULL	NULL	NULL	NULL
11467752	21192654	72	0	WHITE	Medicare	English	WIDOWED	17.65	K/uL	3.28	m/uL	15.08	K/uL	0.53	K/uL	140	K/uL	9.6	g/dL	21.7	%	31.45	%	2.8	g/dL	NULL	NULL	NULL	NULL	142	mEq/L	4	mEq/L	9.05	mg/dL	112.5	mEq/L	108	mg/dL	NULL	NULL	12.5	mEq/L	NULL	NULL	NULL	NULL	NULL	NULL
11469894	24025293	58	0	UNKNOWN	Medicare	English	NULL	11.5	K/uL	4.51	m/uL	NULL	NULL	NULL	NULL	227	K/uL	14.1	g/dL	12.6	%	39.8	%	NULL	NULL	NULL	NULL	NULL	NULL	139	mEq/L	3.8	mEq/L	8.8	mg/dL	102	mEq/L	285	mg/dL	12.6	%	18	mEq/L	NULL	NULL	NULL	NULL	NULL	NULL
11478670	25808565	81	1	OTHER	Medicare	English	MARRIED	11.3	K/uL	2.35	m/uL	7.99	K/uL	1.95	K/uL	154	K/uL	7.55	g/dL	13.1	%	24.53	%	NULL	NULL	NULL	NULL	NULL	NULL	NULL	NULL	4.7	mEq/L	NULL	NULL	117	mEq/L	NULL	NULL	NULL	NULL	7	mEq/L	7.41	units	39.44	mm Hg	256.44	mm Hg
11486244	28804650	77	1	BLACK/AFRICAN AMERICAN	Medicare	English	MARRIED	7	K/uL	4.25	m/uL	NULL	NULL	NULL	NULL	176	K/uL	12.5	g/dL	14.6	%	38.5	%	NULL	NULL	NULL	NULL	NULL	NULL	141	mEq/L	4.2	mEq/L	7.2	mg/dL	109	mEq/L	197	mg/dL	NULL	NULL	12	mEq/L	NULL	NULL	NULL	NULL	NULL	NULL
11493624	25754440	79	0	WHITE	Medicare	English	WIDOWED	6.6	K/uL	3.75	m/uL	3.81	K/uL	1.87	K/uL	210	K/uL	11.7	g/dL	13.6	%	35.2	%	NULL	NULL	NULL	NULL	NULL	NULL	138	mEq/L	4.9	mEq/L	NULL	NULL	100	mEq/L	89	mg/dL	NULL	NULL	15	mEq/L	NULL	NULL	NULL	NULL	NULL	NULL
11497868	22275134	85	1	UNKNOWN	Medicare	English	MARRIED	11.1	K/uL	4.06	m/uL	NULL	NULL	NULL	NULL	241	K/uL	12.2	g/dL	13.6	%	37	%	NULL	NULL	NULL	NULL	NULL	NULL	138	mEq/L	3.7	mEq/L	8.6	mg/dL	103	mEq/L	135	mg/dL	8.2	%	12	mEq/L	NULL	NULL	NULL	NULL	NULL	NULL
11503970	28557292	69	1	WHITE	Medicare	English	WIDOWED	9.15	K/uL	3.12	m/uL	7.58	K/uL	0.77	K/uL	223.5	K/uL	9.2	g/dL	13.45	%	28.5	%	3	g/dL	NULL	NULL	NULL	NULL	125.75	mEq/L	4.48	mEq/L	7.48	mg/dL	85	mEq/L	505.5	mg/dL	NULL	NULL	14.25	mEq/L	7.42	units	50	mm Hg	114	mm Hg
11508602	25006334	78	1	PATIENT DECLINED TO ANSWER	Medicare	English	MARRIED	NULL	NULL	NULL	NULL	NULL	NULL	NULL	NULL	NULL	NULL	NULL	NULL	NULL	NULL	NULL	NULL	NULL	NULL	NULL	NULL	NULL	NULL	NULL	NULL	NULL	NULL	NULL	NULL	NULL	NULL	NULL	NULL	NULL	NULL	NULL	NULL	NULL	NULL	NULL	NULL	NULL	NULL
11516863	21133849	68	1	WHITE - RUSSIAN	Private	Russian	MARRIED	6.9	K/uL	2.68	m/uL	NULL	NULL	NULL	NULL	95	K/uL	7.5	g/dL	19.9	%	24.3	%	NULL	NULL	NULL	NULL	NULL	NULL	136	mEq/L	5.1	mEq/L	9.2	mg/dL	101	mEq/L	127	mg/dL	7.1	%	14	mEq/L	NULL	NULL	NULL	NULL	NULL	NULL
11518919	24954876	72	0	WHITE	Medicare	English	WIDOWED	9.1	K/uL	4.18	m/uL	NULL	NULL	NULL	NULL	223.5	K/uL	12	g/dL	13.9	%	35.7	%	NULL	NULL	NULL	NULL	NULL	NULL	140	mEq/L	4.25	mEq/L	8.8	mg/dL	103	mEq/L	180	mg/dL	NULL	NULL	14	mEq/L	NULL	NULL	NULL	NULL	NULL	NULL
11519868	24181680	70	0	WHITE	Medicare	English	SINGLE	NULL	NULL	NULL	NULL	NULL	NULL	NULL	NULL	NULL	NULL	NULL	NULL	NULL	NULL	NULL	NULL	NULL	NULL	NULL	NULL	NULL	NULL	NULL	NULL	NULL	NULL	NULL	NULL	NULL	NULL	NULL	NULL	NULL	NULL	NULL	NULL	NULL	NULL	NULL	NULL	NULL	NULL
11520584	29436073	77	0	WHITE	Medicare	English	DIVORCED	6.1	K/uL	2.73	m/uL	NULL	NULL	NULL	NULL	201	K/uL	7.5	g/dL	14.5	%	23.6	%	NULL	NULL	NULL	NULL	NULL	NULL	145	mEq/L	4.5	mEq/L	10.4	mg/dL	108	mEq/L	105	mg/dL	NULL	NULL	15	mEq/L	NULL	NULL	NULL	NULL	NULL	NULL
11521153	27603277	63	0	UNKNOWN	Medicaid	English	NULL	15.2	K/uL	4.4	m/uL	NULL	NULL	NULL	NULL	152	K/uL	13.3	g/dL	12.7	%	39.4	%	NULL	NULL	NULL	NULL	NULL	NULL	139	mEq/L	3.9	mEq/L	9.2	mg/dL	103	mEq/L	170	mg/dL	7.7	%	13	mEq/L	NULL	NULL	NULL	NULL	NULL	NULL
11534314	24077951	78	0	UNKNOWN	Medicare	English	WIDOWED	9.35	K/uL	3.53	m/uL	NULL	NULL	NULL	NULL	227	K/uL	9.9	g/dL	19.5	%	30.55	%	NULL	NULL	NULL	NULL	NULL	NULL	140	mEq/L	4.9	mEq/L	9.7	mg/dL	100.5	mEq/L	177	mg/dL	NULL	NULL	11	mEq/L	NULL	NULL	NULL	NULL	NULL	NULL
11534768	25335105	62	1	WHITE	Medicare	English	SINGLE	NULL	NULL	NULL	NULL	NULL	NULL	NULL	NULL	NULL	NULL	NULL	NULL	NULL	NULL	NULL	NULL	NULL	NULL	NULL	NULL	NULL	NULL	NULL	NULL	NULL	NULL	NULL	NULL	NULL	NULL	NULL	NULL	NULL	NULL	NULL	NULL	NULL	NULL	NULL	NULL	NULL	NULL
11540038	24880981	77	1	WHITE - OTHER EUROPEAN	Medicare	English	MARRIED	15.25	K/uL	2.58	m/uL	NULL	NULL	NULL	NULL	173	K/uL	7.45	g/dL	16.65	%	22.95	%	NULL	NULL	NULL	NULL	NULL	NULL	138	mEq/L	4.1	mEq/L	8.3	mg/dL	106.5	mEq/L	109	mg/dL	NULL	NULL	11	mEq/L	NULL	NULL	NULL	NULL	NULL	NULL
11540608	21117819	61	0	WHITE	Medicare	English	SINGLE	7.5	K/uL	3.52	m/uL	NULL	NULL	NULL	NULL	287	K/uL	10.9	g/dL	12.8	%	32.3	%	NULL	NULL	NULL	NULL	NULL	NULL	136	mEq/L	3.8	mEq/L	8.3	mg/dL	95	mEq/L	184	mg/dL	NULL	NULL	19	mEq/L	NULL	NULL	NULL	NULL	NULL	NULL
11545574	26125539	76	1	WHITE	Medicare	English	WIDOWED	10.55	K/uL	4.31	m/uL	NULL	NULL	NULL	NULL	141	K/uL	12.35	g/dL	14.25	%	38.3	%	NULL	NULL	NULL	NULL	NULL	NULL	140	mEq/L	4.65	mEq/L	8.4	mg/dL	104	mEq/L	422.5	mg/dL	NULL	NULL	14	mEq/L	7.39	units	43	mm Hg	69	mm Hg
11550595	21565758	71	0	UNABLE TO OBTAIN	Medicare	English	MARRIED	9.2	K/uL	4.5	m/uL	NULL	NULL	NULL	NULL	229.5	K/uL	13.65	g/dL	12.8	%	41.4	%	3.9	g/dL	NULL	NULL	NULL	NULL	138.5	mEq/L	4	mEq/L	9.65	mg/dL	100.5	mEq/L	192.5	mg/dL	8.7	%	14.5	mEq/L	NULL	NULL	NULL	NULL	NULL	NULL
11551127	24670518	81	0	WHITE	Medicare	English	MARRIED	NULL	NULL	NULL	NULL	NULL	NULL	NULL	NULL	NULL	NULL	NULL	NULL	NULL	NULL	NULL	NULL	NULL	NULL	NULL	NULL	NULL	NULL	NULL	NULL	NULL	NULL	NULL	NULL	NULL	NULL	NULL	NULL	NULL	NULL	NULL	NULL	NULL	NULL	NULL	NULL	NULL	NULL
11577476	26015048	64	0	OTHER	Medicaid	English	SINGLE	9.75	K/uL	3.25	m/uL	6.05	K/uL	3.08	K/uL	240.5	K/uL	10.05	g/dL	12	%	31.5	%	3.7	g/dL	NULL	NULL	5.9	g/dL	138.67	mEq/L	4.37	mEq/L	9.7	mg/dL	101.67	mEq/L	161.67	mg/dL	NULL	NULL	13	mEq/L	NULL	NULL	NULL	NULL	NULL	NULL
11579903	25509560	52	1	UNKNOWN	Private	English	NULL	15.5	K/uL	4.25	m/uL	NULL	NULL	NULL	NULL	241	K/uL	13.3	g/dL	13.8	%	40.75	%	NULL	NULL	NULL	NULL	NULL	NULL	138	mEq/L	5	mEq/L	8.75	mg/dL	97.5	mEq/L	151	mg/dL	6.1	%	13.5	mEq/L	7.3	units	60.2	mm Hg	74.8	mm Hg
11580566	20261652	67	1	WHITE	Private	English	MARRIED	9.3	K/uL	4.01	m/uL	NULL	NULL	NULL	NULL	220	K/uL	12	g/dL	12.6	%	37	%	NULL	NULL	NULL	NULL	NULL	NULL	138	mEq/L	4.2	mEq/L	9.1	mg/dL	103	mEq/L	146	mg/dL	NULL	NULL	12	mEq/L	NULL	NULL	NULL	NULL	NULL	NULL
11588223	24458222	49	1	WHITE	Medicaid	English	NULL	NULL	NULL	NULL	NULL	NULL	NULL	NULL	NULL	NULL	NULL	NULL	NULL	NULL	NULL	NULL	NULL	NULL	NULL	NULL	NULL	NULL	NULL	137	mEq/L	3.8	mEq/L	NULL	NULL	96	mEq/L	154	mg/dL	NULL	NULL	16	mEq/L	NULL	NULL	NULL	NULL	NULL	NULL
11592009	23633473	83	0	WHITE	Medicare	English	DIVORCED	7.2	K/uL	3.68	m/uL	NULL	NULL	NULL	NULL	230	K/uL	9.9	g/dL	14.9	%	32.9	%	NULL	NULL	NULL	NULL	NULL	NULL	145	mEq/L	4	mEq/L	8.6	mg/dL	102	mEq/L	97	mg/dL	NULL	NULL	13	mEq/L	NULL	NULL	NULL	NULL	NULL	NULL
11593390	26576572	65	1	WHITE	Medicare	English	MARRIED	NULL	NULL	NULL	NULL	NULL	NULL	NULL	NULL	NULL	NULL	NULL	NULL	NULL	NULL	NULL	NULL	NULL	NULL	NULL	NULL	NULL	NULL	NULL	NULL	NULL	NULL	NULL	NULL	NULL	NULL	NULL	NULL	NULL	NULL	NULL	NULL	7.3	units	56.5	mm Hg	192.5	mm Hg
11596232	22319284	66	0	UNKNOWN	Private	English	NULL	13.37	K/uL	3.32	m/uL	12.83	K/uL	0.47	K/uL	106	K/uL	10.37	g/dL	15.93	%	33.33	%	3.1	g/dL	NULL	NULL	NULL	NULL	142.33	mEq/L	3.87	mEq/L	8.43	mg/dL	98	mEq/L	128.67	mg/dL	NULL	NULL	10	mEq/L	7.33	units	67.5	mm Hg	54.5	mm Hg
11609598	23903722	74	0	BLACK/AFRICAN AMERICAN	Medicare	English	SINGLE	8.3	K/uL	2.91	m/uL	NULL	NULL	NULL	NULL	169	K/uL	9.1	g/dL	14.6	%	28.8	%	3	g/dL	NULL	NULL	NULL	NULL	137	mEq/L	4.7	mEq/L	8.1	mg/dL	101.67	mEq/L	201	mg/dL	5.9	%	11.67	mEq/L	7.28	units	53.45	mm Hg	88.55	mm Hg
11621666	21219310	68	0	WHITE	Medicare	English	SINGLE	NULL	NULL	NULL	NULL	NULL	NULL	NULL	NULL	NULL	NULL	NULL	NULL	NULL	NULL	NULL	NULL	NULL	NULL	NULL	NULL	NULL	NULL	NULL	NULL	NULL	NULL	NULL	NULL	NULL	NULL	NULL	NULL	NULL	NULL	NULL	NULL	NULL	NULL	NULL	NULL	NULL	NULL
11624268	26802671	64	0	WHITE	Medicare	English	SINGLE	NULL	NULL	NULL	NULL	NULL	NULL	NULL	NULL	NULL	NULL	NULL	NULL	NULL	NULL	NULL	NULL	NULL	NULL	NULL	NULL	NULL	NULL	NULL	NULL	NULL	NULL	NULL	NULL	NULL	NULL	NULL	NULL	NULL	NULL	NULL	NULL	NULL	NULL	NULL	NULL	NULL	NULL
11628638	24943705	67	1	WHITE	Private	English	MARRIED	NULL	NULL	NULL	NULL	NULL	NULL	NULL	NULL	NULL	NULL	NULL	NULL	NULL	NULL	NULL	NULL	NULL	NULL	NULL	NULL	NULL	NULL	NULL	NULL	NULL	NULL	NULL	NULL	NULL	NULL	NULL	NULL	NULL	NULL	NULL	NULL	NULL	NULL	NULL	NULL	NULL	NULL
11633737	26571961	48	1	WHITE	Private	English	MARRIED	NULL	NULL	NULL	NULL	NULL	NULL	NULL	NULL	NULL	NULL	NULL	NULL	NULL	NULL	NULL	NULL	NULL	NULL	NULL	NULL	NULL	NULL	NULL	NULL	NULL	NULL	NULL	NULL	NULL	NULL	NULL	NULL	NULL	NULL	NULL	NULL	NULL	NULL	NULL	NULL	NULL	NULL
11640969	20918762	56	1	BLACK/AFRICAN AMERICAN	Medicare	English	SINGLE	NULL	NULL	NULL	NULL	NULL	NULL	NULL	NULL	NULL	NULL	NULL	NULL	NULL	NULL	NULL	NULL	NULL	NULL	NULL	NULL	NULL	NULL	NULL	NULL	NULL	NULL	NULL	NULL	NULL	NULL	NULL	NULL	NULL	NULL	NULL	NULL	NULL	NULL	NULL	NULL	NULL	NULL
11646417	24138101	56	0	BLACK/AFRICAN AMERICAN	Medicare	English	SINGLE	NULL	NULL	NULL	NULL	NULL	NULL	NULL	NULL	NULL	NULL	NULL	NULL	NULL	NULL	33.1	%	NULL	NULL	NULL	NULL	NULL	NULL	NULL	NULL	NULL	NULL	NULL	NULL	NULL	NULL	NULL	NULL	NULL	NULL	NULL	NULL	NULL	NULL	NULL	NULL	NULL	NULL
11647491	27009543	64	1	WHITE	Medicare	English	WIDOWED	8	K/uL	4.68	m/uL	6.08	K/uL	0.92	K/uL	167	K/uL	15.6	g/dL	12	%	44.9	%	3.6	g/dL	NULL	NULL	NULL	NULL	139.33	mEq/L	3.07	mEq/L	9	mg/dL	104	mEq/L	153	mg/dL	NULL	NULL	13	mEq/L	NULL	NULL	NULL	NULL	NULL	NULL
11649157	25527621	68	1	UNKNOWN	Private	English	MARRIED	17.03	K/uL	4.43	m/uL	NULL	NULL	NULL	NULL	192.33	K/uL	13.47	g/dL	12.7	%	41.3	%	3.7	g/dL	NULL	NULL	NULL	NULL	136	mEq/L	4.8	mEq/L	9.1	mg/dL	102	mEq/L	161.67	mg/dL	5.9	%	13	mEq/L	7.39	units	39.5	mm Hg	75	mm Hg
11650674	21241768	60	0	UNKNOWN	Medicare	English	NULL	4.9	K/uL	3.9	m/uL	3.77	K/uL	0.44	K/uL	203	K/uL	9.8	g/dL	16.7	%	34	%	3.9	g/dL	NULL	NULL	NULL	NULL	146	mEq/L	4.35	mEq/L	NULL	NULL	101	mEq/L	113	mg/dL	NULL	NULL	12	mEq/L	NULL	NULL	NULL	NULL	NULL	NULL
11655240	24761343	74	0	HISPANIC/LATINO - DOMINICAN	Medicaid	Spanish	SINGLE	6.9	K/uL	4.5	m/uL	4.95	K/uL	1.73	K/uL	197.5	K/uL	13	g/dL	13.2	%	40.3	%	3.9	g/dL	NULL	NULL	6.2	g/dL	143	mEq/L	3.3	mEq/L	9.85	mg/dL	101.5	mEq/L	145.5	mg/dL	6.4	%	14	mEq/L	NULL	NULL	NULL	NULL	NULL	NULL
11657714	23870277	66	0	WHITE	Medicare	English	DIVORCED	8.1	K/uL	4.23	m/uL	NULL	NULL	NULL	NULL	210	K/uL	12.3	g/dL	15	%	37.5	%	NULL	NULL	NULL	NULL	NULL	NULL	136	mEq/L	4.2	mEq/L	9.1	mg/dL	97	mEq/L	158	mg/dL	NULL	NULL	18	mEq/L	NULL	NULL	NULL	NULL	NULL	NULL
11662094	27915819	87	0	WHITE	Medicare	English	MARRIED	12.1	K/uL	3.77	m/uL	NULL	NULL	NULL	NULL	144	K/uL	10.2	g/dL	17.2	%	32.6	%	NULL	NULL	NULL	NULL	NULL	NULL	141	mEq/L	3.2	mEq/L	8.2	mg/dL	99	mEq/L	151	mg/dL	NULL	NULL	11	mEq/L	NULL	NULL	NULL	NULL	NULL	NULL
11666819	21686893	62	0	WHITE	Private	English	MARRIED	NULL	NULL	NULL	NULL	NULL	NULL	NULL	NULL	NULL	NULL	NULL	NULL	NULL	NULL	NULL	NULL	NULL	NULL	NULL	NULL	NULL	NULL	NULL	NULL	NULL	NULL	NULL	NULL	NULL	NULL	NULL	NULL	NULL	NULL	NULL	NULL	NULL	NULL	NULL	NULL	NULL	NULL
11668295	22214433	57	0	HISPANIC/LATINO - PUERTO RICAN	Medicaid	English	DIVORCED	14.4	K/uL	3.03	m/uL	NULL	NULL	NULL	NULL	220	K/uL	8.8	g/dL	15.2	%	28.2	%	NULL	NULL	NULL	NULL	NULL	NULL	139	mEq/L	4.5	mEq/L	8.1	mg/dL	102	mEq/L	235	mg/dL	NULL	NULL	11	mEq/L	NULL	NULL	NULL	NULL	NULL	NULL
11677149	22876626	54	1	WHITE	Medicare	English	DIVORCED	12.9	K/uL	3	m/uL	NULL	NULL	NULL	NULL	292	K/uL	8.5	g/dL	14.6	%	26.7	%	3.4	g/dL	NULL	NULL	NULL	NULL	135.5	mEq/L	4	mEq/L	7.8	mg/dL	99	mEq/L	111	mg/dL	NULL	NULL	17	mEq/L	7.46	units	40	mm Hg	93	mm Hg
11680446	22585628	57	0	UNKNOWN	Medicaid	Spanish	NULL	16.2	K/uL	3.22	m/uL	14.37	K/uL	1.88	K/uL	288.5	K/uL	9.35	g/dL	14.25	%	29.65	%	3.2	g/dL	NULL	NULL	NULL	NULL	138.5	mEq/L	4	mEq/L	8.7	mg/dL	100	mEq/L	104	mg/dL	6.6	%	10.5	mEq/L	NULL	NULL	NULL	NULL	NULL	NULL
11681212	23878083	66	1	WHITE	Medicaid	English	SINGLE	15.9	K/uL	3.86	m/uL	10.2	K/uL	2.71	K/uL	390	K/uL	10.4	g/dL	14.8	%	33	%	NULL	NULL	NULL	NULL	NULL	NULL	136	mEq/L	5.3	mEq/L	9.7	mg/dL	103	mEq/L	124	mg/dL	NULL	NULL	12	mEq/L	7.35	units	39	mm Hg	46	mm Hg
11684618	24876442	79	1	WHITE	Medicare	English	DIVORCED	4.7	K/uL	3.74	m/uL	NULL	NULL	NULL	NULL	180.5	K/uL	7.9	g/dL	15.6	%	26	%	NULL	NULL	NULL	NULL	NULL	NULL	143	mEq/L	3.9	mEq/L	10.1	mg/dL	102	mEq/L	78	mg/dL	NULL	NULL	13	mEq/L	NULL	NULL	NULL	NULL	NULL	NULL
11686774	23782589	70	1	WHITE	Medicare	English	SINGLE	8.1	K/uL	3.05	m/uL	NULL	NULL	NULL	NULL	71	K/uL	9.9	g/dL	17.2	%	29.8	%	NULL	NULL	NULL	NULL	NULL	NULL	139	mEq/L	4.8	mEq/L	8.5	mg/dL	100	mEq/L	196	mg/dL	NULL	NULL	14	mEq/L	7.42	units	45.5	mm Hg	29	mm Hg
11692854	22883955	72	0	WHITE - OTHER EUROPEAN	Medicare	English	SINGLE	8.7	K/uL	3.64	m/uL	NULL	NULL	NULL	NULL	136	K/uL	11.15	g/dL	14.2	%	35	%	NULL	NULL	NULL	NULL	NULL	NULL	141	mEq/L	4.1	mEq/L	8.8	mg/dL	103	mEq/L	194	mg/dL	NULL	NULL	13	mEq/L	NULL	NULL	NULL	NULL	NULL	NULL
11693201	20292944	79	1	WHITE	Medicare	English	MARRIED	6.2	K/uL	4.28	m/uL	3.11	K/uL	2.19	K/uL	100	K/uL	12	g/dL	13.5	%	37.6	%	NULL	NULL	NULL	NULL	NULL	NULL	139	mEq/L	5	mEq/L	NULL	NULL	104	mEq/L	91	mg/dL	NULL	NULL	13	mEq/L	NULL	NULL	NULL	NULL	NULL	NULL
11696506	23974911	50	1	WHITE - OTHER EUROPEAN	Medicaid	English	MARRIED	5.4	K/uL	3.74	m/uL	NULL	NULL	NULL	NULL	92	K/uL	9.5	g/dL	28.15	%	32.5	%	2.8	g/dL	NULL	NULL	NULL	NULL	134.67	mEq/L	3.23	mEq/L	7.83	mg/dL	99.67	mEq/L	195.33	mg/dL	NULL	NULL	15.67	mEq/L	NULL	NULL	NULL	NULL	NULL	NULL
11700176	23657444	57	1	OTHER	Medicaid	English	NULL	13.2	K/uL	5.04	m/uL	NULL	NULL	NULL	NULL	211	K/uL	13.6	g/dL	16.4	%	46.5	%	NULL	NULL	NULL	NULL	NULL	NULL	138.67	mEq/L	5.23	mEq/L	9.07	mg/dL	86	mEq/L	192	mg/dL	NULL	NULL	11	mEq/L	7.33	units	90	mm Hg	91	mm Hg
11700434	26322637	82	0	HISPANIC/LATINO - PUERTO RICAN	Medicare	Spanish	WIDOWED	5.4	K/uL	3.88	m/uL	NULL	NULL	NULL	NULL	299	K/uL	10.6	g/dL	14.6	%	33.8	%	NULL	NULL	NULL	NULL	NULL	NULL	141	mEq/L	4.9	mEq/L	9.4	mg/dL	101	mEq/L	173	mg/dL	NULL	NULL	13	mEq/L	NULL	NULL	NULL	NULL	NULL	NULL
11701626	21043941	65	0	WHITE	Medicaid	English	DIVORCED	6.85	K/uL	2.44	m/uL	2.06	K/uL	0.91	K/uL	128.5	K/uL	7.25	g/dL	16.65	%	23.55	%	NULL	NULL	NULL	NULL	NULL	NULL	NULL	NULL	NULL	NULL	NULL	NULL	NULL	NULL	NULL	NULL	NULL	NULL	NULL	NULL	NULL	NULL	NULL	NULL	NULL	NULL
11721141	22024204	74	0	WHITE	Medicare	English	MARRIED	12.95	K/uL	4.62	m/uL	9.18	K/uL	2.38	K/uL	696	K/uL	13.05	g/dL	14.6	%	41.75	%	3.15	g/dL	NULL	NULL	NULL	NULL	141.5	mEq/L	3.25	mEq/L	8.65	mg/dL	105	mEq/L	104.5	mg/dL	6.2	%	10.5	mEq/L	NULL	NULL	NULL	NULL	NULL	NULL
11724388	28153629	82	1	WHITE	Medicare	English	WIDOWED	11.8	K/uL	2.42	m/uL	NULL	NULL	NULL	NULL	195	K/uL	8	g/dL	13.7	%	24.9	%	2.3	g/dL	NULL	NULL	NULL	NULL	137	mEq/L	3.95	mEq/L	7.6	mg/dL	107	mEq/L	97.5	mg/dL	NULL	NULL	10	mEq/L	NULL	NULL	NULL	NULL	NULL	NULL
11726216	29806185	69	1	OTHER	Private	English	MARRIED	12.1	K/uL	4.78	m/uL	7.99	K/uL	2.91	K/uL	291	K/uL	14.6	g/dL	13	%	42	%	4.4	g/dL	NULL	NULL	6.6	g/dL	138	mEq/L	4	mEq/L	9.2	mg/dL	101	mEq/L	114	mg/dL	6.1	%	16	mEq/L	NULL	NULL	NULL	NULL	NULL	NULL
11729603	22830699	77	1	WHITE	Medicaid	Modern Greek (1453-)	MARRIED	9.3	K/uL	3.73	m/uL	NULL	NULL	NULL	NULL	164	K/uL	11.7	g/dL	13.9	%	35.9	%	3.7	g/dL	NULL	NULL	NULL	NULL	141	mEq/L	4.3	mEq/L	8.5	mg/dL	104	mEq/L	162	mg/dL	NULL	NULL	11	mEq/L	NULL	NULL	NULL	NULL	NULL	NULL
11740173	26527736	69	0	WHITE	Medicare	English	DIVORCED	24.3	K/uL	3.74	m/uL	21.83	K/uL	0.96	K/uL	383	K/uL	10.1	g/dL	16.9	%	32.8	%	3.3	g/dL	NULL	NULL	NULL	NULL	136	mEq/L	4	mEq/L	9.4	mg/dL	93	mEq/L	344	mg/dL	NULL	NULL	18	mEq/L	7.42	units	46	mm Hg	50	mm Hg
11741448	23428190	66	1	WHITE	Medicare	English	MARRIED	12.05	K/uL	3.55	m/uL	9.04	K/uL	1.08	K/uL	135	K/uL	10.73	g/dL	13.8	%	32.7	%	NULL	NULL	NULL	NULL	NULL	NULL	NULL	NULL	5.1	mEq/L	NULL	NULL	109	mEq/L	NULL	NULL	NULL	NULL	10	mEq/L	7.35	units	43	mm Hg	179.78	mm Hg
11742505	24067631	72	0	UNKNOWN	Medicare	English	MARRIED	14.03	K/uL	3.64	m/uL	14.07	K/uL	0.21	K/uL	128.25	K/uL	11.45	g/dL	17.8	%	37.28	%	NULL	NULL	NULL	NULL	NULL	NULL	138.25	mEq/L	4.4	mEq/L	8.68	mg/dL	89	mEq/L	143.75	mg/dL	5.7	%	11.5	mEq/L	7.36	units	90.67	mm Hg	52.67	mm Hg
11743050	21443662	80	1	WHITE	Medicare	English	MARRIED	NULL	NULL	NULL	NULL	NULL	NULL	NULL	NULL	NULL	NULL	NULL	NULL	NULL	NULL	NULL	NULL	NULL	NULL	NULL	NULL	NULL	NULL	NULL	NULL	NULL	NULL	NULL	NULL	NULL	NULL	NULL	NULL	NULL	NULL	NULL	NULL	NULL	NULL	NULL	NULL	NULL	NULL
11744131	20128558	53	0	OTHER	Medicaid	English	SINGLE	1.95	K/uL	3.55	m/uL	1.27	K/uL	0.64	K/uL	73.5	K/uL	10.8	g/dL	17.35	%	33.7	%	NULL	NULL	NULL	NULL	NULL	NULL	140	mEq/L	3.3	mEq/L	8	mg/dL	102.5	mEq/L	87.5	mg/dL	NULL	NULL	11.5	mEq/L	NULL	NULL	NULL	NULL	NULL	NULL
11746942	27531587	74	1	UNKNOWN	Medicare	English	MARRIED	11.88	K/uL	3.33	m/uL	8.3	K/uL	1.53	K/uL	105.25	K/uL	10.33	g/dL	11.6	%	30.08	%	NULL	NULL	NULL	NULL	NULL	NULL	138.5	mEq/L	4.8	mEq/L	8.1	mg/dL	108	mEq/L	227	mg/dL	NULL	NULL	12	mEq/L	7.33	units	42	mm Hg	144.5	mm Hg
11752559	26383749	80	0	UNKNOWN	Medicare	English	NULL	15.22	K/uL	4.15	m/uL	NULL	NULL	NULL	NULL	122.6	K/uL	11.5	g/dL	15.58	%	35.46	%	NULL	NULL	NULL	NULL	NULL	NULL	142.75	mEq/L	4.36	mEq/L	8.7	mg/dL	109.75	mEq/L	169.8	mg/dL	NULL	NULL	12.5	mEq/L	7.32	units	42.1	mm Hg	96.2	mm Hg
11755038	28415181	71	1	WHITE	Medicare	English	MARRIED	11.45	K/uL	4.04	m/uL	NULL	NULL	NULL	NULL	170.5	K/uL	12.2	g/dL	14.5	%	36.8	%	3.1	g/dL	NULL	NULL	NULL	NULL	139	mEq/L	5.1	mEq/L	8	mg/dL	105	mEq/L	201.5	mg/dL	5.7	%	13.5	mEq/L	NULL	NULL	NULL	NULL	NULL	NULL
11760104	22651141	83	0	UNKNOWN	Medicare	English	NULL	30.1	K/uL	3.6	m/uL	NULL	NULL	NULL	NULL	88	K/uL	9.8	g/dL	17.78	%	30.93	%	1.8	g/dL	NULL	NULL	NULL	NULL	133.75	mEq/L	3.98	mEq/L	7.7	mg/dL	98	mEq/L	285	mg/dL	NULL	NULL	20	mEq/L	7.3	units	44.4	mm Hg	103.6	mm Hg
11764117	22485812	71	1	WHITE	Medicare	English	MARRIED	NULL	NULL	NULL	NULL	NULL	NULL	NULL	NULL	NULL	NULL	NULL	NULL	NULL	NULL	NULL	NULL	NULL	NULL	NULL	NULL	NULL	NULL	NULL	NULL	NULL	NULL	NULL	NULL	NULL	NULL	NULL	NULL	NULL	NULL	NULL	NULL	NULL	NULL	NULL	NULL	NULL	NULL
11767491	27548859	60	1	WHITE	Medicaid	English	DIVORCED	6.7	K/uL	3.73	m/uL	NULL	NULL	NULL	NULL	185	K/uL	10.2	g/dL	14.8	%	30.2	%	3.3	g/dL	NULL	NULL	NULL	NULL	129	mEq/L	5.3	mEq/L	8.9	mg/dL	96	mEq/L	352	mg/dL	NULL	NULL	13	mEq/L	NULL	NULL	NULL	NULL	NULL	NULL
11773768	20171617	64	1	WHITE	Private	English	DIVORCED	15.3	K/uL	4.25	m/uL	NULL	NULL	NULL	NULL	371	K/uL	14.4	g/dL	12.6	%	43.5	%	NULL	NULL	NULL	NULL	NULL	NULL	138	mEq/L	5.2	mEq/L	NULL	NULL	104	mEq/L	157	mg/dL	NULL	NULL	15	mEq/L	7.34	units	41.33	mm Hg	248.33	mm Hg
11778147	20938268	65	0	UNKNOWN	Private	English	NULL	20.2	K/uL	2.79	m/uL	14.47	K/uL	2.56	K/uL	165	K/uL	8.44	g/dL	15.06	%	25.61	%	2.4	g/dL	NULL	NULL	NULL	NULL	141	mEq/L	3.75	mEq/L	7.5	mg/dL	113	mEq/L	97.5	mg/dL	NULL	NULL	5.5	mEq/L	NULL	NULL	NULL	NULL	NULL	NULL
11781229	22450408	70	1	WHITE	Medicare	English	MARRIED	NULL	NULL	NULL	NULL	NULL	NULL	NULL	NULL	NULL	NULL	NULL	NULL	NULL	NULL	NULL	NULL	NULL	NULL	NULL	NULL	NULL	NULL	NULL	NULL	NULL	NULL	NULL	NULL	NULL	NULL	NULL	NULL	NULL	NULL	NULL	NULL	NULL	NULL	NULL	NULL	NULL	NULL
11802336	24322780	79	0	WHITE	Medicare	English	DIVORCED	13.1	K/uL	4.39	m/uL	NULL	NULL	NULL	NULL	388	K/uL	12.3	g/dL	13	%	37.5	%	NULL	NULL	NULL	NULL	NULL	NULL	137	mEq/L	4.6	mEq/L	9.5	mg/dL	93	mEq/L	83	mg/dL	NULL	NULL	15	mEq/L	NULL	NULL	NULL	NULL	NULL	NULL
11803381	22603581	62	0	WHITE	Medicare	English	MARRIED	12.5	K/uL	4.04	m/uL	NULL	NULL	NULL	NULL	195	K/uL	11.7	g/dL	19	%	37.3	%	NULL	NULL	NULL	NULL	NULL	NULL	136	mEq/L	3.8	mEq/L	9.3	mg/dL	93	mEq/L	223	mg/dL	NULL	NULL	17	mEq/L	NULL	NULL	NULL	NULL	NULL	NULL
11804959	20128460	67	1	WHITE	Medicare	English	MARRIED	12.9	K/uL	4.36	m/uL	NULL	NULL	NULL	NULL	249	K/uL	10.9	g/dL	17.2	%	39.3	%	3.9	g/dL	NULL	NULL	NULL	NULL	138	mEq/L	5.77	mEq/L	8.73	mg/dL	103.67	mEq/L	147	mg/dL	NULL	NULL	16	mEq/L	7.29	units	47.33	mm Hg	35.67	mm Hg
11812438	20732340	49	1	WHITE	Medicaid	English	SINGLE	7.5	K/uL	4.95	m/uL	NULL	NULL	NULL	NULL	158	K/uL	15	g/dL	15.4	%	45.3	%	NULL	NULL	NULL	NULL	NULL	NULL	139	mEq/L	4.7	mEq/L	9	mg/dL	100	mEq/L	85	mg/dL	NULL	NULL	13	mEq/L	NULL	NULL	NULL	NULL	NULL	NULL
11815103	24059151	67	1	HISPANIC/LATINO - DOMINICAN	Medicare	Spanish	MARRIED	12.2	K/uL	2.97	m/uL	0.98	K/uL	10.98	K/uL	57	K/uL	8.6	g/dL	16.5	%	27.8	%	NULL	NULL	NULL	NULL	NULL	NULL	147	mEq/L	4	mEq/L	8.1	mg/dL	110	mEq/L	104	mg/dL	NULL	NULL	14	mEq/L	NULL	NULL	NULL	NULL	NULL	NULL
11825223	28766971	91	0	WHITE	Medicare	English	WIDOWED	10.95	K/uL	3.01	m/uL	NULL	NULL	NULL	NULL	206	K/uL	9.2	g/dL	12.78	%	28.95	%	NULL	NULL	NULL	NULL	NULL	NULL	144	mEq/L	3.9	mEq/L	9	mg/dL	106	mEq/L	123	mg/dL	NULL	NULL	12	mEq/L	NULL	NULL	NULL	NULL	NULL	NULL
11836195	29785088	79	0	UNKNOWN	Medicare	English	NULL	20.27	K/uL	3.39	m/uL	19.32	K/uL	0.38	K/uL	297	K/uL	7.9	g/dL	14.6	%	27.13	%	NULL	NULL	NULL	NULL	NULL	NULL	140	mEq/L	3.65	mEq/L	7.9	mg/dL	106	mEq/L	181.5	mg/dL	6.4	%	12	mEq/L	7.32	units	47.67	mm Hg	57.67	mm Hg
11836722	22659832	78	0	HISPANIC/LATINO - DOMINICAN	Medicaid	Spanish	SINGLE	16	K/uL	2.97	m/uL	NULL	NULL	NULL	NULL	211.5	K/uL	9	g/dL	13	%	27.47	%	NULL	NULL	NULL	NULL	NULL	NULL	139.67	mEq/L	4.3	mEq/L	8.6	mg/dL	97.67	mEq/L	162.33	mg/dL	NULL	NULL	15.67	mEq/L	7.42	units	45	mm Hg	125.5	mm Hg
11841568	26702955	78	1	UNKNOWN	Medicare	English	MARRIED	9.97	K/uL	3.11	m/uL	7.9	K/uL	1.43	K/uL	88.67	K/uL	8.9	g/dL	27.13	%	26.1	%	4.05	g/dL	NULL	NULL	NULL	NULL	135.67	mEq/L	4.53	mEq/L	9.17	mg/dL	102.67	mEq/L	102.33	mg/dL	NULL	NULL	17.67	mEq/L	7.35	units	28	mm Hg	127.67	mm Hg
11852610	28070369	68	1	WHITE	Medicare	English	WIDOWED	10.8	K/uL	NULL	NULL	NULL	NULL	NULL	NULL	205	K/uL	NULL	NULL	NULL	NULL	42.9	%	NULL	NULL	NULL	NULL	NULL	NULL	132	mEq/L	3.7	mEq/L	NULL	NULL	90	mEq/L	197	mg/dL	NULL	NULL	21	mEq/L	7.43	units	36.75	mm Hg	291	mm Hg
11854310	21295160	68	0	WHITE	Medicare	English	DIVORCED	13.25	K/uL	2.79	m/uL	NULL	NULL	NULL	NULL	207	K/uL	7.93	g/dL	17.08	%	25.5	%	NULL	NULL	NULL	NULL	NULL	NULL	141	mEq/L	5.5	mEq/L	8.8	mg/dL	104	mEq/L	97	mg/dL	NULL	NULL	17	mEq/L	NULL	NULL	NULL	NULL	NULL	NULL
11861877	25767883	51	0	BLACK/AFRICAN AMERICAN	Private	English	SINGLE	7.2	K/uL	5.02	m/uL	3.64	K/uL	2.77	K/uL	400	K/uL	15.2	g/dL	12.6	%	46	%	3.9	g/dL	NULL	NULL	NULL	NULL	135	mEq/L	5.6	mEq/L	NULL	NULL	99	mEq/L	173	mg/dL	NULL	NULL	15	mEq/L	NULL	NULL	NULL	NULL	NULL	NULL
11862339	27538481	61	1	BLACK/AFRICAN AMERICAN	Other	English	NULL	10.6	K/uL	4.25	m/uL	NULL	NULL	NULL	NULL	134	K/uL	11.4	g/dL	17.6	%	39	%	NULL	NULL	NULL	NULL	NULL	NULL	141	mEq/L	4.7	mEq/L	8.4	mg/dL	98	mEq/L	119	mg/dL	NULL	NULL	16	mEq/L	NULL	NULL	NULL	NULL	NULL	NULL
11866565	27032966	78	1	WHITE - OTHER EUROPEAN	Medicare	English	MARRIED	7.9	K/uL	2.56	m/uL	NULL	NULL	NULL	NULL	264	K/uL	7.2	g/dL	13.8	%	22.2	%	NULL	NULL	NULL	NULL	NULL	NULL	140.67	mEq/L	5.17	mEq/L	8.8	mg/dL	100	mEq/L	227.33	mg/dL	7.1	%	18.33	mEq/L	7.4	units	41.67	mm Hg	37	mm Hg
11886465	23108597	84	1	HISPANIC/LATINO - PUERTO RICAN	Medicare	Spanish	MARRIED	9.15	K/uL	2.63	m/uL	NULL	NULL	NULL	NULL	119	K/uL	8.3	g/dL	14.5	%	26.55	%	NULL	NULL	NULL	NULL	NULL	NULL	139	mEq/L	5.07	mEq/L	9.63	mg/dL	104.67	mEq/L	251	mg/dL	NULL	NULL	24.33	mEq/L	7.22	units	30	mm Hg	63.57	mm Hg
11893149	24625000	47	0	WHITE	Medicare	English	DIVORCED	9.4	K/uL	3.73	m/uL	NULL	NULL	NULL	NULL	349	K/uL	10.9	g/dL	14.3	%	33.3	%	4.1	g/dL	NULL	NULL	NULL	NULL	141	mEq/L	3.6	mEq/L	NULL	NULL	96	mEq/L	92	mg/dL	6.6	%	17	mEq/L	NULL	NULL	NULL	NULL	NULL	NULL
11900856	25331173	80	1	WHITE	Medicare	English	MARRIED	28.35	K/uL	4.13	m/uL	27.83	K/uL	1.77	K/uL	220.5	K/uL	11.95	g/dL	15.9	%	38.7	%	NULL	NULL	NULL	NULL	NULL	NULL	139	mEq/L	4	mEq/L	8.3	mg/dL	97	mEq/L	117.5	mg/dL	NULL	NULL	17	mEq/L	7.31	units	63.33	mm Hg	75.33	mm Hg
11902027	21015660	85	0	WHITE	Medicare	English	WIDOWED	13.1	K/uL	3.57	m/uL	10	K/uL	1.07	K/uL	176	K/uL	10.35	g/dL	14.6	%	31.7	%	2.1	g/dL	NULL	NULL	NULL	NULL	132.5	mEq/L	4	mEq/L	6.95	mg/dL	97	mEq/L	130.5	mg/dL	NULL	NULL	11.5	mEq/L	7.42	units	40	mm Hg	48	mm Hg
11903031	28428841	78	1	WHITE	Medicare	English	WIDOWED	9.2	K/uL	4.04	m/uL	5.63	K/uL	2.46	K/uL	155	K/uL	12.4	g/dL	13.3	%	38	%	NULL	NULL	NULL	NULL	NULL	NULL	137	mEq/L	3.8	mEq/L	8.7	mg/dL	98	mEq/L	137	mg/dL	NULL	NULL	19	mEq/L	NULL	NULL	NULL	NULL	NULL	NULL
11905508	22433858	66	1	WHITE	Private	English	MARRIED	9.4	K/uL	3.89	m/uL	7.45	K/uL	1.67	K/uL	175	K/uL	12.75	g/dL	12.4	%	36.3	%	NULL	NULL	NULL	NULL	NULL	NULL	136	mEq/L	4.5	mEq/L	9.3	mg/dL	97.5	mEq/L	127	mg/dL	NULL	NULL	18	mEq/L	NULL	NULL	NULL	NULL	NULL	NULL
11909680	27546272	81	1	WHITE	Medicare	English	MARRIED	5.6	K/uL	4.01	m/uL	3.78	K/uL	0.97	K/uL	171	K/uL	11.2	g/dL	14.6	%	35.2	%	NULL	NULL	NULL	NULL	NULL	NULL	136	mEq/L	4.3	mEq/L	7.8	mg/dL	105	mEq/L	172	mg/dL	NULL	NULL	7	mEq/L	NULL	NULL	NULL	NULL	NULL	NULL
11915105	26469083	92	0	WHITE	Medicare	English	WIDOWED	11.7	K/uL	3.57	m/uL	NULL	NULL	NULL	NULL	166	K/uL	10.9	g/dL	13.8	%	33.3	%	3.2	g/dL	NULL	NULL	NULL	NULL	129	mEq/L	4.7	mEq/L	9.25	mg/dL	92	mEq/L	218	mg/dL	11.9	%	18.5	mEq/L	NULL	NULL	NULL	NULL	NULL	NULL
11915704	22679905	67	1	WHITE	Medicare	English	SINGLE	NULL	NULL	NULL	NULL	NULL	NULL	NULL	NULL	NULL	NULL	NULL	NULL	NULL	NULL	NULL	NULL	NULL	NULL	NULL	NULL	NULL	NULL	NULL	NULL	NULL	NULL	NULL	NULL	NULL	NULL	NULL	NULL	NULL	NULL	NULL	NULL	NULL	NULL	NULL	NULL	NULL	NULL
11918408	21400352	59	1	WHITE	Medicare	English	MARRIED	11.3	K/uL	3.32	m/uL	NULL	NULL	NULL	NULL	281	K/uL	9.7	g/dL	15.75	%	29.9	%	NULL	NULL	NULL	NULL	NULL	NULL	139	mEq/L	4.03	mEq/L	8.8	mg/dL	97	mEq/L	198.25	mg/dL	NULL	NULL	15.5	mEq/L	7.4	units	45	mm Hg	60.67	mm Hg
11923807	25222968	84	1	WHITE	Medicare	English	WIDOWED	15	K/uL	4.4	m/uL	NULL	NULL	NULL	NULL	159	K/uL	13.2	g/dL	13	%	41	%	3.8	g/dL	NULL	NULL	NULL	NULL	136	mEq/L	4.2	mEq/L	8.8	mg/dL	95	mEq/L	168	mg/dL	NULL	NULL	15	mEq/L	NULL	NULL	NULL	NULL	NULL	NULL
11928036	21834739	57	1	OTHER	Private	English	MARRIED	NULL	NULL	NULL	NULL	NULL	NULL	NULL	NULL	NULL	NULL	NULL	NULL	NULL	NULL	NULL	NULL	4.1	g/dL	NULL	NULL	NULL	NULL	NULL	NULL	NULL	NULL	NULL	NULL	NULL	NULL	NULL	NULL	NULL	NULL	NULL	NULL	NULL	NULL	NULL	NULL	NULL	NULL
11934740	29570343	48	1	WHITE	Medicaid	English	SINGLE	12.7	K/uL	4.26	m/uL	11.05	K/uL	0.89	K/uL	305	K/uL	11.4	g/dL	13.9	%	35.6	%	NULL	NULL	NULL	NULL	NULL	NULL	135	mEq/L	3.7	mEq/L	NULL	NULL	94	mEq/L	373	mg/dL	NULL	NULL	20	mEq/L	NULL	NULL	NULL	NULL	NULL	NULL
11939151	27034242	77	1	WHITE	Medicare	English	DIVORCED	18	K/uL	3.54	m/uL	NULL	NULL	NULL	NULL	198	K/uL	11	g/dL	12.9	%	32.9	%	NULL	NULL	NULL	NULL	NULL	NULL	139	mEq/L	4.7	mEq/L	8.4	mg/dL	103	mEq/L	163	mg/dL	NULL	NULL	14	mEq/L	7.33	units	45.25	mm Hg	147	mm Hg
11944629	24951113	56	0	BLACK/AFRICAN AMERICAN	Medicaid	English	WIDOWED	11	K/uL	2.84	m/uL	NULL	NULL	NULL	NULL	324	K/uL	8.7	g/dL	13.5	%	25.9	%	NULL	NULL	NULL	NULL	NULL	NULL	137	mEq/L	3.7	mEq/L	NULL	NULL	100	mEq/L	197	mg/dL	NULL	NULL	11	mEq/L	NULL	NULL	NULL	NULL	NULL	NULL
11953575	26931048	77	1	WHITE	Medicare	English	SINGLE	9.9	K/uL	5.21	m/uL	NULL	NULL	NULL	NULL	248.5	K/uL	15.65	g/dL	15.3	%	48.25	%	3.5	g/dL	2.4	g/dL	5.9	g/dL	139	mEq/L	4.8	mEq/L	9.45	mg/dL	98	mEq/L	105.5	mg/dL	NULL	NULL	11	mEq/L	NULL	NULL	NULL	NULL	NULL	NULL
11960904	20096978	76	1	WHITE	Medicare	English	MARRIED	17.9	K/uL	2.73	m/uL	NULL	NULL	NULL	NULL	237	K/uL	8.2	g/dL	17.15	%	26.6	%	2.8	g/dL	NULL	NULL	NULL	NULL	133	mEq/L	5.47	mEq/L	8.5	mg/dL	98	mEq/L	134.67	mg/dL	NULL	NULL	14.33	mEq/L	NULL	NULL	NULL	NULL	NULL	NULL
11961710	23097136	82	1	UNKNOWN	Medicare	English	NULL	16.25	K/uL	4.15	m/uL	NULL	NULL	NULL	NULL	229.5	K/uL	12.7	g/dL	15.55	%	39.6	%	NULL	NULL	NULL	NULL	NULL	NULL	139	mEq/L	4.1	mEq/L	8.7	mg/dL	105	mEq/L	145	mg/dL	NULL	NULL	14.5	mEq/L	7.4	units	41	mm Hg	237	mm Hg
11988071	21220445	70	0	WHITE	Medicare	English	SINGLE	9.5	K/uL	3.41	m/uL	NULL	NULL	NULL	NULL	171	K/uL	10.5	g/dL	14.2	%	33.8	%	NULL	NULL	NULL	NULL	NULL	NULL	138	mEq/L	5	mEq/L	8.1	mg/dL	105	mEq/L	154	mg/dL	NULL	NULL	12	mEq/L	7.3	units	51	mm Hg	249	mm Hg
11991352	22793343	65	0	WHITE	Medicare	English	SINGLE	15.3	K/uL	4.3	m/uL	NULL	NULL	NULL	NULL	159	K/uL	13	g/dL	15.1	%	39.2	%	NULL	NULL	NULL	NULL	NULL	NULL	142	mEq/L	5.2	mEq/L	9.5	mg/dL	107	mEq/L	86	mg/dL	NULL	NULL	14	mEq/L	NULL	NULL	NULL	NULL	NULL	NULL
11993496	28515306	66	1	WHITE	Medicare	English	NULL	9.5	K/uL	3.73	m/uL	6.04	K/uL	2.23	K/uL	267	K/uL	9.3	g/dL	17	%	29.6	%	3.3	g/dL	NULL	NULL	NULL	NULL	146	mEq/L	3.8	mEq/L	8.3	mg/dL	111	mEq/L	135.5	mg/dL	NULL	NULL	9.5	mEq/L	7.33	units	55	mm Hg	29	mm Hg
11994774	26747499	65	0	WHITE	Medicaid	English	SINGLE	18.3	K/uL	3.77	m/uL	16.15	K/uL	0.6	K/uL	175	K/uL	10	g/dL	16.6	%	32.6	%	2.9	g/dL	NULL	NULL	NULL	NULL	146	mEq/L	3.6	mEq/L	8.4	mg/dL	100	mEq/L	191	mg/dL	NULL	NULL	15	mEq/L	NULL	NULL	NULL	NULL	NULL	NULL
12019819	29183821	75	1	WHITE	Private	English	MARRIED	NULL	NULL	NULL	NULL	NULL	NULL	NULL	NULL	NULL	NULL	NULL	NULL	NULL	NULL	NULL	NULL	NULL	NULL	NULL	NULL	NULL	NULL	NULL	NULL	NULL	NULL	NULL	NULL	NULL	NULL	NULL	NULL	NULL	NULL	NULL	NULL	NULL	NULL	NULL	NULL	NULL	NULL
12023540	27292944	78	1	WHITE	Medicare	English	WIDOWED	12.53	K/uL	3.11	m/uL	10.51	K/uL	0.52	K/uL	134.33	K/uL	8.9	g/dL	15.6	%	27.63	%	NULL	NULL	NULL	NULL	NULL	NULL	146	mEq/L	4.8	mEq/L	NULL	NULL	110	mEq/L	231	mg/dL	NULL	NULL	14	mEq/L	NULL	NULL	NULL	NULL	NULL	NULL
12024666	20642414	67	1	PATIENT DECLINED TO ANSWER	Medicare	English	SINGLE	6.3	K/uL	4.29	m/uL	NULL	NULL	NULL	NULL	283.5	K/uL	10.4	g/dL	26.6	%	36.15	%	NULL	NULL	NULL	NULL	6.6	g/dL	141.67	mEq/L	5	mEq/L	9.03	mg/dL	100	mEq/L	136.33	mg/dL	NULL	NULL	11.67	mEq/L	NULL	NULL	NULL	NULL	NULL	NULL
12026479	29724757	66	1	WHITE	Private	English	DIVORCED	NULL	NULL	NULL	NULL	NULL	NULL	NULL	NULL	NULL	NULL	NULL	NULL	NULL	NULL	NULL	NULL	NULL	NULL	NULL	NULL	NULL	NULL	NULL	NULL	NULL	NULL	NULL	NULL	NULL	NULL	NULL	NULL	NULL	NULL	NULL	NULL	NULL	NULL	NULL	NULL	NULL	NULL
12032220	26012937	58	0	WHITE - EASTERN EUROPEAN	Medicare	English	DIVORCED	4.6	K/uL	3.58	m/uL	NULL	NULL	NULL	NULL	255	K/uL	9.1	g/dL	15.9	%	30.4	%	NULL	NULL	NULL	NULL	5.4	g/dL	140	mEq/L	4.2	mEq/L	8.8	mg/dL	105	mEq/L	85	mg/dL	6.4	%	12	mEq/L	NULL	NULL	NULL	NULL	NULL	NULL
12033342	21052021	62	1	UNKNOWN	Medicaid	English	NULL	12.7	K/uL	3.5	m/uL	NULL	NULL	NULL	NULL	287	K/uL	11.9	g/dL	12.5	%	35.6	%	NULL	NULL	NULL	NULL	NULL	NULL	136	mEq/L	3.8	mEq/L	9.6	mg/dL	100	mEq/L	121	mg/dL	NULL	NULL	8	mEq/L	NULL	NULL	NULL	NULL	NULL	NULL
12038934	20014356	67	0	BLACK/AFRICAN AMERICAN	Private	English	WIDOWED	4.1	K/uL	3.42	m/uL	NULL	NULL	NULL	NULL	166	K/uL	10.6	g/dL	14.3	%	34.9	%	NULL	NULL	NULL	NULL	NULL	NULL	142	mEq/L	4.4	mEq/L	9	mg/dL	108	mEq/L	128	mg/dL	NULL	NULL	10	mEq/L	NULL	NULL	NULL	NULL	NULL	NULL
12040036	28809889	77	0	WHITE	Medicare	English	DIVORCED	9.1	K/uL	3.3	m/uL	NULL	NULL	NULL	NULL	188	K/uL	9.7	g/dL	14	%	31.1	%	NULL	NULL	NULL	NULL	NULL	NULL	138	mEq/L	4.3	mEq/L	12.4	mg/dL	104	mEq/L	173	mg/dL	NULL	NULL	12	mEq/L	NULL	NULL	NULL	NULL	NULL	NULL
12044498	21020644	71	1	WHITE	Medicare	English	NULL	15	K/uL	2.68	m/uL	NULL	NULL	NULL	NULL	146	K/uL	8.4	g/dL	14.1	%	25.7	%	NULL	NULL	NULL	NULL	NULL	NULL	140	mEq/L	4.2	mEq/L	8.7	mg/dL	100	mEq/L	121	mg/dL	NULL	NULL	11	mEq/L	NULL	NULL	NULL	NULL	NULL	NULL
12055966	28487843	91	0	PORTUGUESE	Medicaid	Portuguese	MARRIED	4.4	K/uL	4.28	m/uL	NULL	NULL	NULL	NULL	159	K/uL	10.9	g/dL	15	%	36.3	%	2.6	g/dL	NULL	NULL	NULL	NULL	135	mEq/L	3.4	mEq/L	8.1	mg/dL	97	mEq/L	199	mg/dL	NULL	NULL	11	mEq/L	NULL	NULL	NULL	NULL	NULL	NULL
12063544	20727671	78	1	WHITE	Medicare	English	MARRIED	9.1	K/uL	4.7	m/uL	NULL	NULL	NULL	NULL	204	K/uL	14.4	g/dL	12.8	%	42.5	%	NULL	NULL	NULL	NULL	NULL	NULL	142	mEq/L	4	mEq/L	9.4	mg/dL	105	mEq/L	221	mg/dL	NULL	NULL	14	mEq/L	NULL	NULL	NULL	NULL	NULL	NULL
12065912	26693463	63	1	WHITE	Medicaid	English	SINGLE	NULL	NULL	NULL	NULL	NULL	NULL	NULL	NULL	NULL	NULL	NULL	NULL	NULL	NULL	34.7	%	NULL	NULL	NULL	NULL	NULL	NULL	127.33	mEq/L	6	mEq/L	9.6	mg/dL	92.67	mEq/L	224	mg/dL	NULL	NULL	19	mEq/L	NULL	NULL	NULL	NULL	NULL	NULL
12065977	27388669	74	0	WHITE	Medicaid	English	SINGLE	5.8	K/uL	4.24	m/uL	NULL	NULL	NULL	NULL	331.5	K/uL	10.1	g/dL	19.55	%	33.85	%	NULL	NULL	NULL	NULL	NULL	NULL	140.5	mEq/L	4.4	mEq/L	9.5	mg/dL	98.5	mEq/L	101	mg/dL	NULL	NULL	12.5	mEq/L	NULL	NULL	NULL	NULL	NULL	NULL
12068139	28882438	74	1	WHITE	Medicare	English	WIDOWED	7.7	K/uL	4.49	m/uL	NULL	NULL	NULL	NULL	134	K/uL	14.2	g/dL	13.9	%	44.2	%	NULL	NULL	NULL	NULL	NULL	NULL	147	mEq/L	4	mEq/L	9.1	mg/dL	109	mEq/L	88	mg/dL	NULL	NULL	13	mEq/L	NULL	NULL	NULL	NULL	NULL	NULL
12078788	25339027	72	1	WHITE	Medicare	English	SINGLE	11.83	K/uL	3.2	m/uL	10.57	K/uL	1.53	K/uL	114	K/uL	8.8	g/dL	14.83	%	27.27	%	4.1	g/dL	3	g/dL	7.1	g/dL	142	mEq/L	3.35	mEq/L	NULL	NULL	106.5	mEq/L	116	mg/dL	5.4	%	12.5	mEq/L	7.34	units	46	mm Hg	199	mm Hg
12106610	29187676	60	1	WHITE	Private	English	MARRIED	9.7	K/uL	4.13	m/uL	NULL	NULL	NULL	NULL	211	K/uL	14.1	g/dL	13	%	40.8	%	NULL	NULL	NULL	NULL	NULL	NULL	140	mEq/L	4	mEq/L	9.2	mg/dL	104	mEq/L	96	mg/dL	NULL	NULL	17	mEq/L	NULL	NULL	NULL	NULL	NULL	NULL
12108706	20088960	83	1	WHITE	Medicare	English	MARRIED	7.9	K/uL	4.5	m/uL	NULL	NULL	NULL	NULL	101	K/uL	12.6	g/dL	13.4	%	40.8	%	NULL	NULL	NULL	NULL	NULL	NULL	140	mEq/L	4.6	mEq/L	8.9	mg/dL	104	mEq/L	119	mg/dL	NULL	NULL	9	mEq/L	NULL	NULL	NULL	NULL	NULL	NULL
12115656	25112317	68	1	WHITE	Medicare	English	MARRIED	8.1	K/uL	4.37	m/uL	NULL	NULL	NULL	NULL	210.5	K/uL	13.4	g/dL	15.9	%	42.4	%	3.3	g/dL	NULL	NULL	NULL	NULL	146	mEq/L	5.2	mEq/L	9.6	mg/dL	101	mEq/L	57.5	mg/dL	6.1	%	14	mEq/L	7.37	units	52.33	mm Hg	329.33	mm Hg
12119264	21135397	69	0	WHITE	Private	English	MARRIED	9.8	K/uL	3.83	m/uL	7.47	K/uL	1.47	K/uL	279	K/uL	10.5	g/dL	13.2	%	33.3	%	4	g/dL	NULL	NULL	NULL	NULL	144	mEq/L	3.6	mEq/L	9.6	mg/dL	104	mEq/L	126	mg/dL	7.3	%	14	mEq/L	NULL	NULL	NULL	NULL	NULL	NULL
12121287	23295149	63	0	WHITE	Private	English	MARRIED	8.3	K/uL	4.64	m/uL	NULL	NULL	NULL	NULL	228	K/uL	14.2	g/dL	11.9	%	40.8	%	NULL	NULL	NULL	NULL	NULL	NULL	138	mEq/L	4.3	mEq/L	9.2	mg/dL	105	mEq/L	211	mg/dL	8.6	%	11	mEq/L	NULL	NULL	NULL	NULL	NULL	NULL
12141354	23917242	59	1	WHITE	Medicaid	English	SINGLE	16.38	K/uL	3.24	m/uL	NULL	NULL	NULL	NULL	159	K/uL	10.38	g/dL	13.4	%	30.6	%	NULL	NULL	NULL	NULL	NULL	NULL	138.67	mEq/L	4.2	mEq/L	7.67	mg/dL	105.67	mEq/L	162.33	mg/dL	NULL	NULL	17	mEq/L	7.28	units	38	mm Hg	108.83	mm Hg
12146541	26859741	66	0	BLACK/AFRICAN AMERICAN	Medicare	English	DIVORCED	NULL	NULL	NULL	NULL	NULL	NULL	NULL	NULL	NULL	NULL	NULL	NULL	NULL	NULL	NULL	NULL	NULL	NULL	NULL	NULL	NULL	NULL	NULL	NULL	NULL	NULL	NULL	NULL	NULL	NULL	NULL	NULL	NULL	NULL	NULL	NULL	NULL	NULL	NULL	NULL	NULL	NULL
12147044	25645666	67	0	WHITE	Medicare	English	WIDOWED	11.8	K/uL	2.53	m/uL	8.25	K/uL	2.15	K/uL	269	K/uL	8.6	g/dL	12.2	%	28.3	%	NULL	NULL	NULL	NULL	NULL	NULL	139	mEq/L	5.3	mEq/L	NULL	NULL	106	mEq/L	285	mg/dL	NULL	NULL	12	mEq/L	NULL	NULL	NULL	NULL	NULL	NULL
12148521	26278797	92	1	WHITE	Medicare	English	MARRIED	11.95	K/uL	3.55	m/uL	NULL	NULL	NULL	NULL	151.5	K/uL	11.7	g/dL	13.4	%	33.7	%	NULL	NULL	NULL	NULL	NULL	NULL	124	mEq/L	4	mEq/L	8.18	mg/dL	85	mEq/L	138.5	mg/dL	NULL	NULL	14	mEq/L	7.4	units	52	mm Hg	32	mm Hg
12148577	25491610	70	1	SOUTH AMERICAN	Private	Spanish	MARRIED	7.6	K/uL	3.95	m/uL	NULL	NULL	NULL	NULL	200	K/uL	8.2	g/dL	20	%	27.9	%	NULL	NULL	NULL	NULL	NULL	NULL	137	mEq/L	4.4	mEq/L	8.2	mg/dL	95	mEq/L	169	mg/dL	5.8	%	11	mEq/L	7.47	units	46.33	mm Hg	216.33	mm Hg
12154889	28099238	64	0	OTHER	Medicare	English	MARRIED	12.5	K/uL	2.74	m/uL	NULL	NULL	NULL	NULL	375	K/uL	7.47	g/dL	17.5	%	25.47	%	NULL	NULL	NULL	NULL	NULL	NULL	135.67	mEq/L	4.23	mEq/L	7.9	mg/dL	93.67	mEq/L	166	mg/dL	NULL	NULL	25	mEq/L	7.34	units	45	mm Hg	28	mm Hg
12163153	21149517	69	1	WHITE	Medicare	English	MARRIED	8	K/uL	4.33	m/uL	NULL	NULL	NULL	NULL	275	K/uL	12.4	g/dL	13	%	37.9	%	3.8	g/dL	NULL	NULL	NULL	NULL	136	mEq/L	3.9	mEq/L	9.3	mg/dL	96	mEq/L	169	mg/dL	NULL	NULL	14	mEq/L	NULL	NULL	NULL	NULL	NULL	NULL
12165673	25933075	73	0	WHITE	Medicare	English	DIVORCED	3.3	K/uL	3.58	m/uL	NULL	NULL	NULL	NULL	161	K/uL	10.7	g/dL	13	%	33.1	%	NULL	NULL	NULL	NULL	NULL	NULL	139	mEq/L	3.7	mEq/L	8.7	mg/dL	105	mEq/L	122	mg/dL	NULL	NULL	9	mEq/L	NULL	NULL	NULL	NULL	NULL	NULL
12170733	26324185	76	0	WHITE	Medicare	English	MARRIED	15.8	K/uL	3.83	m/uL	NULL	NULL	NULL	NULL	190	K/uL	11.1	g/dL	14.1	%	34	%	NULL	NULL	NULL	NULL	NULL	NULL	140	mEq/L	4.5	mEq/L	7.8	mg/dL	109	mEq/L	185	mg/dL	NULL	NULL	11	mEq/L	7.32	units	37.8	mm Hg	201.2	mm Hg
12176259	23601385	71	1	WHITE	Medicare	English	MARRIED	13.4	K/uL	5.15	m/uL	NULL	NULL	NULL	NULL	239	K/uL	16.1	g/dL	14.1	%	47.3	%	NULL	NULL	NULL	NULL	NULL	NULL	138	mEq/L	4.4	mEq/L	NULL	NULL	97	mEq/L	104	mg/dL	NULL	NULL	27	mEq/L	NULL	NULL	NULL	NULL	NULL	NULL
12180060	27524688	76	0	UNKNOWN	Medicare	English	MARRIED	17.65	K/uL	3.07	m/uL	15.1	K/uL	0.61	K/uL	152.5	K/uL	9.1	g/dL	20.85	%	29.45	%	3	g/dL	NULL	NULL	NULL	NULL	131	mEq/L	4.55	mEq/L	8.05	mg/dL	91.5	mEq/L	130	mg/dL	4.2	%	20.5	mEq/L	7.34	units	43	mm Hg	40	mm Hg
12195577	27163273	69	0	WHITE	Medicare	English	DIVORCED	9.05	K/uL	4.26	m/uL	NULL	NULL	NULL	NULL	288.5	K/uL	11.5	g/dL	18.65	%	36.7	%	3.1	g/dL	NULL	NULL	NULL	NULL	135.33	mEq/L	3.7	mEq/L	9.2	mg/dL	95.33	mEq/L	259	mg/dL	11.3	%	11.33	mEq/L	NULL	NULL	NULL	NULL	NULL	NULL
12196078	24885140	77	1	UNABLE TO OBTAIN	Medicare	English	NULL	17.5	K/uL	3.3	m/uL	16.32	K/uL	3.01	K/uL	143.5	K/uL	10.65	g/dL	12.7	%	32.7	%	4.1	g/dL	NULL	NULL	NULL	NULL	133	mEq/L	4.2	mEq/L	NULL	NULL	104	mEq/L	195	mg/dL	7.6	%	8	mEq/L	7.37	units	40.6	mm Hg	365	mm Hg
12196601	27605128	58	0	UNKNOWN	Medicare	English	NULL	26.6	K/uL	3.73	m/uL	24.29	K/uL	1.14	K/uL	293	K/uL	11.6	g/dL	15.3	%	35.8	%	NULL	NULL	NULL	NULL	NULL	NULL	133	mEq/L	4.8	mEq/L	7.8	mg/dL	102	mEq/L	317	mg/dL	NULL	NULL	18	mEq/L	7.31	units	39.5	mm Hg	107	mm Hg
12203750	27506693	92	0	WHITE	Medicare	English	NULL	8.15	K/uL	3.35	m/uL	5.58	K/uL	0.98	K/uL	195.5	K/uL	10.65	g/dL	14.3	%	32.3	%	2.9	g/dL	NULL	NULL	NULL	NULL	134	mEq/L	3.65	mEq/L	8.6	mg/dL	100.5	mEq/L	182	mg/dL	7.3	%	11	mEq/L	NULL	NULL	NULL	NULL	NULL	NULL
12206592	26460743	73	1	UNKNOWN	Medicare	English	NULL	20.2	K/uL	4.51	m/uL	18.55	K/uL	0.48	K/uL	267	K/uL	14.25	g/dL	15.75	%	42.15	%	3.9	g/dL	NULL	NULL	NULL	NULL	133.5	mEq/L	5.6	mEq/L	9	mg/dL	97	mEq/L	298	mg/dL	NULL	NULL	17	mEq/L	NULL	NULL	NULL	NULL	NULL	NULL
12207384	23969644	60	1	WHITE	Medicaid	English	DIVORCED	13	K/uL	4.05	m/uL	7.62	K/uL	4.2	K/uL	298	K/uL	12.9	g/dL	13.2	%	38.7	%	NULL	NULL	NULL	NULL	NULL	NULL	138	mEq/L	3.7	mEq/L	NULL	NULL	102	mEq/L	301	mg/dL	NULL	NULL	12	mEq/L	NULL	NULL	NULL	NULL	NULL	NULL
12207555	29293243	77	1	HISPANIC/LATINO - CENTRAL AMERICAN	Private	English	MARRIED	10.6	K/uL	4.35	m/uL	NULL	NULL	NULL	NULL	202	K/uL	13.4	g/dL	13.2	%	40.6	%	NULL	NULL	NULL	NULL	NULL	NULL	141	mEq/L	4.5	mEq/L	8.9	mg/dL	102	mEq/L	104	mg/dL	NULL	NULL	13	mEq/L	NULL	NULL	NULL	NULL	NULL	NULL
12209634	29373818	88	0	ASIAN - CHINESE	Medicaid	Khmer	MARRIED	8.3	K/uL	3.55	m/uL	NULL	NULL	NULL	NULL	203	K/uL	10.1	g/dL	14.3	%	32	%	NULL	NULL	NULL	NULL	NULL	NULL	137	mEq/L	4.45	mEq/L	NULL	NULL	103.5	mEq/L	110.5	mg/dL	NULL	NULL	13.5	mEq/L	NULL	NULL	NULL	NULL	NULL	NULL
12210487	20110789	78	0	UNKNOWN	Medicare	English	SINGLE	19.1	K/uL	3.27	m/uL	13.63	K/uL	2	K/uL	142	K/uL	9.9	g/dL	13.8	%	30.6	%	NULL	NULL	NULL	NULL	NULL	NULL	137	mEq/L	5.1	mEq/L	8.8	mg/dL	103	mEq/L	161	mg/dL	NULL	NULL	15	mEq/L	NULL	NULL	NULL	NULL	NULL	NULL
12214956	21952167	81	0	WHITE	Medicare	English	WIDOWED	8.8	K/uL	3.86	m/uL	NULL	NULL	NULL	NULL	189	K/uL	10.7	g/dL	19.8	%	35.2	%	NULL	NULL	NULL	NULL	NULL	NULL	142	mEq/L	4	mEq/L	9.1	mg/dL	105	mEq/L	103	mg/dL	NULL	NULL	16	mEq/L	NULL	NULL	NULL	NULL	NULL	NULL
12215743	27379271	59	0	WHITE	Medicaid	English	MARRIED	8	K/uL	4.02	m/uL	NULL	NULL	NULL	NULL	157	K/uL	11.5	g/dL	16.1	%	38.3	%	3	g/dL	NULL	NULL	NULL	NULL	139	mEq/L	4.1	mEq/L	8.5	mg/dL	103	mEq/L	140	mg/dL	5.1	%	8	mEq/L	NULL	NULL	NULL	NULL	NULL	NULL
12223331	25173428	64	1	WHITE	Private	English	MARRIED	16.73	K/uL	4.53	m/uL	NULL	NULL	NULL	NULL	194.33	K/uL	12.67	g/dL	15.6	%	41.73	%	2.8	g/dL	NULL	NULL	NULL	NULL	138	mEq/L	4.8	mEq/L	8.07	mg/dL	103	mEq/L	137.67	mg/dL	NULL	NULL	11	mEq/L	7.31	units	NULL	NULL	NULL	NULL
12242487	25567073	51	0	WHITE	Medicare	English	MARRIED	NULL	NULL	NULL	NULL	NULL	NULL	NULL	NULL	NULL	NULL	NULL	NULL	NULL	NULL	NULL	NULL	NULL	NULL	NULL	NULL	NULL	NULL	NULL	NULL	NULL	NULL	NULL	NULL	NULL	NULL	NULL	NULL	NULL	NULL	NULL	NULL	NULL	NULL	NULL	NULL	NULL	NULL
12252397	24784916	65	0	WHITE	Medicare	English	DIVORCED	7.5	K/uL	3.33	m/uL	NULL	NULL	NULL	NULL	91	K/uL	10.4	g/dL	16.6	%	33.4	%	NULL	NULL	NULL	NULL	NULL	NULL	140	mEq/L	4.65	mEq/L	9.35	mg/dL	100	mEq/L	117	mg/dL	NULL	NULL	18	mEq/L	NULL	NULL	NULL	NULL	NULL	NULL
12255713	21050824	76	0	WHITE - OTHER EUROPEAN	Medicare	English	DIVORCED	8.7	K/uL	4.15	m/uL	NULL	NULL	NULL	NULL	461	K/uL	11.1	g/dL	14.6	%	34.9	%	NULL	NULL	NULL	NULL	NULL	NULL	141	mEq/L	3.8	mEq/L	10	mg/dL	104	mEq/L	106	mg/dL	NULL	NULL	13	mEq/L	NULL	NULL	NULL	NULL	NULL	NULL
12256040	24501142	75	0	BLACK/AFRICAN AMERICAN	Medicare	English	MARRIED	11.6	K/uL	3.75	m/uL	NULL	NULL	NULL	NULL	239	K/uL	11.3	g/dL	14.5	%	35.9	%	3.6	g/dL	NULL	NULL	NULL	NULL	139	mEq/L	4.5	mEq/L	9.3	mg/dL	103	mEq/L	136	mg/dL	NULL	NULL	14	mEq/L	7.37	units	43.5	mm Hg	119.5	mm Hg
12260772	20141657	73	0	WHITE	Medicare	English	MARRIED	51.97	K/uL	3.85	m/uL	50.11	K/uL	2.3	K/uL	347.33	K/uL	10.47	g/dL	14.87	%	33.67	%	1.7	g/dL	NULL	NULL	NULL	NULL	134.25	mEq/L	4.25	mEq/L	7.75	mg/dL	95.5	mEq/L	274.75	mg/dL	NULL	NULL	24	mEq/L	7.21	units	35.43	mm Hg	97.71	mm Hg
12262966	29174647	68	0	HISPANIC/LATINO - PUERTO RICAN	Private	Spanish	MARRIED	7.65	K/uL	2.23	m/uL	6.65	K/uL	0.74	K/uL	50	K/uL	7.5	g/dL	18.3	%	23	%	3.7	g/dL	2.8	g/dL	6.5	g/dL	138	mEq/L	4.3	mEq/L	9.7	mg/dL	95	mEq/L	86	mg/dL	5.2	%	19	mEq/L	NULL	NULL	NULL	NULL	NULL	NULL
12264134	25257503	73	0	BLACK/AFRICAN AMERICAN	Private	English	WIDOWED	5	K/uL	2.28	m/uL	NULL	NULL	NULL	NULL	139	K/uL	7.1	g/dL	16.3	%	22.1	%	NULL	NULL	NULL	NULL	NULL	NULL	143	mEq/L	4	mEq/L	8	mg/dL	108	mEq/L	82	mg/dL	4.7	%	20	mEq/L	NULL	NULL	NULL	NULL	NULL	NULL
12264178	22944655	92	0	WHITE	Medicare	English	WIDOWED	34.35	K/uL	4.59	m/uL	NULL	NULL	NULL	NULL	64	K/uL	14.25	g/dL	17.2	%	43.7	%	2.95	g/dL	NULL	NULL	NULL	NULL	141.5	mEq/L	4.85	mEq/L	8.6	mg/dL	102	mEq/L	117	mg/dL	NULL	NULL	17	mEq/L	7.34	units	43.5	mm Hg	44	mm Hg
12267080	28646402	78	1	ASIAN - KOREAN	Medicaid	Korean	MARRIED	16.1	K/uL	3.39	m/uL	NULL	NULL	NULL	NULL	327	K/uL	9.8	g/dL	12.9	%	30	%	NULL	NULL	NULL	NULL	NULL	NULL	130	mEq/L	4.1	mEq/L	9.3	mg/dL	93	mEq/L	185	mg/dL	NULL	NULL	15	mEq/L	7.44	units	37	mm Hg	58	mm Hg
12275201	24496184	65	1	WHITE	Medicare	English	WIDOWED	7.9	K/uL	3.15	m/uL	NULL	NULL	NULL	NULL	297	K/uL	8.4	g/dL	15.7	%	26.5	%	NULL	NULL	NULL	NULL	NULL	NULL	136.5	mEq/L	4.1	mEq/L	9.4	mg/dL	98.5	mEq/L	118.5	mg/dL	NULL	NULL	9.5	mEq/L	NULL	NULL	NULL	NULL	NULL	NULL
12279318	26463361	73	1	WHITE	Medicare	English	MARRIED	6.7	K/uL	2.96	m/uL	NULL	NULL	NULL	NULL	166	K/uL	9.5	g/dL	14.8	%	29	%	NULL	NULL	NULL	NULL	NULL	NULL	142	mEq/L	4.9	mEq/L	7.7	mg/dL	102	mEq/L	218	mg/dL	NULL	NULL	18	mEq/L	7.39	units	36	mm Hg	38	mm Hg
12280303	23383965	77	1	WHITE	Medicare	English	MARRIED	11.3	K/uL	3.79	m/uL	9.13	K/uL	0.96	K/uL	189	K/uL	11.6	g/dL	12.7	%	35.5	%	3.3	g/dL	NULL	NULL	NULL	NULL	142	mEq/L	3.8	mEq/L	8.4	mg/dL	105	mEq/L	187	mg/dL	NULL	NULL	15	mEq/L	NULL	NULL	NULL	NULL	NULL	NULL
12281651	20964650	73	0	WHITE	Medicare	English	MARRIED	9.8	K/uL	3.61	m/uL	NULL	NULL	NULL	NULL	264	K/uL	9.6	g/dL	16.7	%	32.4	%	NULL	NULL	NULL	NULL	NULL	NULL	143	mEq/L	3.7	mEq/L	8.45	mg/dL	99.5	mEq/L	294	mg/dL	6.5	%	18.5	mEq/L	NULL	NULL	NULL	NULL	NULL	NULL
12283902	20272776	81	0	UNKNOWN	Medicare	Polish	WIDOWED	7.4	K/uL	3.33	m/uL	NULL	NULL	NULL	NULL	177	K/uL	10.9	g/dL	11.6	%	32.5	%	NULL	NULL	NULL	NULL	NULL	NULL	137	mEq/L	4.2	mEq/L	NULL	NULL	101	mEq/L	138	mg/dL	NULL	NULL	12	mEq/L	NULL	NULL	NULL	NULL	NULL	NULL
12284976	27381416	74	1	WHITE	Medicare	English	MARRIED	NULL	NULL	NULL	NULL	NULL	NULL	NULL	NULL	NULL	NULL	NULL	NULL	NULL	NULL	NULL	NULL	NULL	NULL	NULL	NULL	NULL	NULL	NULL	NULL	NULL	NULL	NULL	NULL	NULL	NULL	NULL	NULL	NULL	NULL	NULL	NULL	7.37	units	37	mm Hg	186	mm Hg
12287167	20872443	59	1	WHITE	Private	English	SINGLE	NULL	NULL	NULL	NULL	NULL	NULL	NULL	NULL	NULL	NULL	NULL	NULL	NULL	NULL	NULL	NULL	NULL	NULL	NULL	NULL	NULL	NULL	NULL	NULL	NULL	NULL	NULL	NULL	NULL	NULL	NULL	NULL	NULL	NULL	NULL	NULL	NULL	NULL	NULL	NULL	NULL	NULL
12291041	21544357	85	0	BLACK/CARIBBEAN ISLAND	Medicaid	English	MARRIED	11.5	K/uL	4.21	m/uL	9.5	K/uL	1.4	K/uL	210	K/uL	12.8	g/dL	13.8	%	38.9	%	NULL	NULL	NULL	NULL	NULL	NULL	142	mEq/L	3.3	mEq/L	9.6	mg/dL	104	mEq/L	237	mg/dL	NULL	NULL	16	mEq/L	NULL	NULL	NULL	NULL	NULL	NULL
12292981	27798691	82	1	WHITE	Medicare	English	SINGLE	NULL	NULL	NULL	NULL	NULL	NULL	NULL	NULL	NULL	NULL	NULL	NULL	NULL	NULL	NULL	NULL	NULL	NULL	NULL	NULL	NULL	NULL	NULL	NULL	NULL	NULL	NULL	NULL	NULL	NULL	NULL	NULL	NULL	NULL	NULL	NULL	NULL	NULL	NULL	NULL	NULL	NULL
12298222	25175425	80	1	UNKNOWN	Medicare	NULL	SINGLE	4.4	K/uL	3.57	m/uL	NULL	NULL	NULL	NULL	107.5	K/uL	11.45	g/dL	12.9	%	34.4	%	NULL	NULL	NULL	NULL	NULL	NULL	140.5	mEq/L	4.3	mEq/L	NULL	NULL	104	mEq/L	83.5	mg/dL	NULL	NULL	12.5	mEq/L	NULL	NULL	NULL	NULL	NULL	NULL
12305460	27609754	86	0	WHITE	Medicare	English	NULL	10.5	K/uL	3.92	m/uL	NULL	NULL	NULL	NULL	252	K/uL	11.3	g/dL	13.8	%	35.9	%	NULL	NULL	NULL	NULL	NULL	NULL	141	mEq/L	4.2	mEq/L	9	mg/dL	103	mEq/L	144	mg/dL	NULL	NULL	15	mEq/L	NULL	NULL	NULL	NULL	NULL	NULL
12309086	21942932	59	0	WHITE	Private	English	DIVORCED	11.9	K/uL	4.95	m/uL	NULL	NULL	NULL	NULL	355	K/uL	12.8	g/dL	15.6	%	40.3	%	NULL	NULL	NULL	NULL	NULL	NULL	140	mEq/L	4	mEq/L	9.2	mg/dL	102	mEq/L	224	mg/dL	10.8	%	10	mEq/L	NULL	NULL	NULL	NULL	NULL	NULL
12310030	29299671	83	1	WHITE	Medicare	English	SINGLE	10.4	K/uL	3.09	m/uL	8.43	K/uL	1.02	K/uL	296	K/uL	9	g/dL	14.4	%	28.5	%	3.25	g/dL	NULL	NULL	NULL	NULL	136.5	mEq/L	3.95	mEq/L	8.7	mg/dL	91.5	mEq/L	164.5	mg/dL	NULL	NULL	19.5	mEq/L	NULL	NULL	NULL	NULL	NULL	NULL
12314399	21758076	80	0	WHITE	Medicare	English	NULL	14.1	K/uL	4.99	m/uL	NULL	NULL	NULL	NULL	180	K/uL	15.9	g/dL	12.6	%	50.8	%	NULL	NULL	NULL	NULL	NULL	NULL	148	mEq/L	3.8	mEq/L	9.7	mg/dL	108	mEq/L	101	mg/dL	6.5	%	19	mEq/L	NULL	NULL	NULL	NULL	NULL	NULL
12319494	21976086	72	1	BLACK/AFRICAN AMERICAN	Private	English	MARRIED	NULL	NULL	NULL	NULL	NULL	NULL	NULL	NULL	NULL	NULL	NULL	NULL	NULL	NULL	NULL	NULL	NULL	NULL	NULL	NULL	NULL	NULL	NULL	NULL	NULL	NULL	NULL	NULL	NULL	NULL	NULL	NULL	NULL	NULL	NULL	NULL	NULL	NULL	NULL	NULL	NULL	NULL
12319770	27915548	71	0	UNKNOWN	Medicare	English	NULL	7.2	K/uL	4.66	m/uL	6.05	K/uL	0.74	K/uL	180	K/uL	14	g/dL	14.45	%	43.2	%	3.7	g/dL	NULL	NULL	NULL	NULL	141	mEq/L	4.3	mEq/L	9.35	mg/dL	100	mEq/L	313.5	mg/dL	NULL	NULL	14.5	mEq/L	NULL	NULL	NULL	NULL	NULL	NULL
12321795	29314411	73	0	WHITE	Medicare	English	SINGLE	15.4	K/uL	4.54	m/uL	12.96	K/uL	1.33	K/uL	185	K/uL	13.1	g/dL	15.6	%	43.3	%	NULL	NULL	NULL	NULL	NULL	NULL	140	mEq/L	3.5	mEq/L	8.5	mg/dL	109	mEq/L	121	mg/dL	5.5	%	16	mEq/L	7.21	units	46	mm Hg	115	mm Hg
12327426	23284612	75	0	WHITE	Medicare	English	WIDOWED	12.45	K/uL	3.65	m/uL	NULL	NULL	NULL	NULL	313.5	K/uL	9.4	g/dL	18.15	%	32.75	%	NULL	NULL	NULL	NULL	5.8	g/dL	146.5	mEq/L	4.05	mEq/L	8.45	mg/dL	97	mEq/L	114.5	mg/dL	8.3	%	15.5	mEq/L	NULL	NULL	NULL	NULL	NULL	NULL
12336445	28664082	76	0	WHITE	Medicare	English	MARRIED	9.1	K/uL	4.02	m/uL	NULL	NULL	NULL	NULL	277	K/uL	12.2	g/dL	12.9	%	38.5	%	4	g/dL	NULL	NULL	NULL	NULL	142	mEq/L	3.8	mEq/L	9.3	mg/dL	104	mEq/L	100	mg/dL	NULL	NULL	12	mEq/L	NULL	NULL	NULL	NULL	NULL	NULL
12350752	20182919	73	1	WHITE	Medicare	English	MARRIED	NULL	NULL	NULL	NULL	NULL	NULL	NULL	NULL	NULL	NULL	NULL	NULL	NULL	NULL	NULL	NULL	NULL	NULL	NULL	NULL	5.3	g/dL	137.67	mEq/L	4.07	mEq/L	11.2	mg/dL	103.67	mEq/L	169	mg/dL	NULL	NULL	14	mEq/L	NULL	NULL	NULL	NULL	NULL	NULL
12373398	27241616	61	1	UNKNOWN	Medicare	English	NULL	7.9	K/uL	5.6	m/uL	NULL	NULL	NULL	NULL	152	K/uL	14.2	g/dL	14.2	%	45.3	%	NULL	NULL	NULL	NULL	NULL	NULL	138.5	mEq/L	3.7	mEq/L	9.1	mg/dL	90	mEq/L	NULL	NULL	NULL	NULL	14	mEq/L	NULL	NULL	NULL	NULL	NULL	NULL
12376843	25951184	84	1	WHITE	Medicare	English	WIDOWED	11.6	K/uL	2.69	m/uL	7.79	K/uL	2.16	K/uL	280	K/uL	8.2	g/dL	15.1	%	24.7	%	NULL	NULL	NULL	NULL	NULL	NULL	136	mEq/L	5.3	mEq/L	NULL	NULL	102	mEq/L	105	mg/dL	NULL	NULL	18	mEq/L	NULL	NULL	NULL	NULL	NULL	NULL
12380750	21940934	74	0	HISPANIC/LATINO - PUERTO RICAN	Medicare	Spanish	MARRIED	NULL	NULL	NULL	NULL	NULL	NULL	NULL	NULL	NULL	NULL	NULL	NULL	NULL	NULL	NULL	NULL	NULL	NULL	NULL	NULL	NULL	NULL	NULL	NULL	NULL	NULL	NULL	NULL	NULL	NULL	NULL	NULL	NULL	NULL	NULL	NULL	NULL	NULL	NULL	NULL	NULL	NULL
12383799	27407535	58	0	WHITE	Medicaid	English	NULL	9.4	K/uL	2.97	m/uL	7.37	K/uL	2.53	K/uL	277.5	K/uL	7.75	g/dL	15.2	%	26.8	%	NULL	NULL	NULL	NULL	NULL	NULL	140	mEq/L	3.6	mEq/L	9.25	mg/dL	101	mEq/L	141.5	mg/dL	NULL	NULL	12	mEq/L	NULL	NULL	NULL	NULL	NULL	NULL
12388358	25326700	80	0	WHITE	Medicare	English	SINGLE	6.63	K/uL	2.54	m/uL	NULL	NULL	NULL	NULL	177	K/uL	7.3	g/dL	15.47	%	23.55	%	NULL	NULL	NULL	NULL	NULL	NULL	138.75	mEq/L	4.2	mEq/L	8.47	mg/dL	99.75	mEq/L	202.33	mg/dL	NULL	NULL	13	mEq/L	7.28	units	NULL	NULL	NULL	NULL
12394964	25874218	75	0	WHITE	Medicare	English	MARRIED	10.7	K/uL	4.05	m/uL	8.04	K/uL	1.74	K/uL	219	K/uL	11.4	g/dL	14.6	%	34.7	%	3.5	g/dL	NULL	NULL	NULL	NULL	137	mEq/L	3.9	mEq/L	8.4	mg/dL	94	mEq/L	141	mg/dL	NULL	NULL	15	mEq/L	7.49	units	46	mm Hg	187	mm Hg
12398246	24356794	79	1	WHITE	Medicare	English	MARRIED	5.3	K/uL	3.11	m/uL	NULL	NULL	NULL	NULL	174	K/uL	10.1	g/dL	13.9	%	31	%	NULL	NULL	NULL	NULL	NULL	NULL	138	mEq/L	3.8	mEq/L	8.8	mg/dL	104	mEq/L	104	mg/dL	NULL	NULL	10	mEq/L	NULL	NULL	NULL	NULL	NULL	NULL
12409528	27331144	79	1	WHITE	Medicare	English	SINGLE	7.9	K/uL	3.88	m/uL	NULL	NULL	NULL	NULL	339	K/uL	10.2	g/dL	15.1	%	33.2	%	NULL	NULL	NULL	NULL	NULL	NULL	146	mEq/L	3.7	mEq/L	10.7	mg/dL	102	mEq/L	130	mg/dL	NULL	NULL	22	mEq/L	NULL	NULL	NULL	NULL	NULL	NULL
12412352	22248040	77	1	HISPANIC/LATINO - DOMINICAN	Medicare	Spanish	NULL	10.5	K/uL	4.47	m/uL	NULL	NULL	NULL	NULL	210	K/uL	12.8	g/dL	15.5	%	39.6	%	4.5	g/dL	NULL	NULL	NULL	NULL	138	mEq/L	4.05	mEq/L	10.2	mg/dL	98	mEq/L	82	mg/dL	6	%	22	mEq/L	NULL	NULL	NULL	NULL	NULL	NULL
12420240	28519139	63	0	WHITE	Medicare	English	MARRIED	NULL	NULL	NULL	NULL	NULL	NULL	NULL	NULL	NULL	NULL	NULL	NULL	NULL	NULL	NULL	NULL	NULL	NULL	NULL	NULL	NULL	NULL	NULL	NULL	NULL	NULL	NULL	NULL	NULL	NULL	NULL	NULL	NULL	NULL	NULL	NULL	NULL	NULL	NULL	NULL	NULL	NULL
12422662	28771784	57	1	WHITE	Medicare	English	SINGLE	5.4	K/uL	2.91	m/uL	NULL	NULL	NULL	NULL	119	K/uL	10.1	g/dL	13.9	%	30.1	%	NULL	NULL	NULL	NULL	NULL	NULL	138	mEq/L	3	mEq/L	7.1	mg/dL	102	mEq/L	72	mg/dL	NULL	NULL	13	mEq/L	7.4	units	45	mm Hg	66	mm Hg
12424035	23129607	74	0	BLACK/AFRICAN AMERICAN	Medicare	English	MARRIED	NULL	NULL	NULL	NULL	NULL	NULL	NULL	NULL	NULL	NULL	NULL	NULL	NULL	NULL	NULL	NULL	NULL	NULL	NULL	NULL	NULL	NULL	NULL	NULL	NULL	NULL	NULL	NULL	NULL	NULL	NULL	NULL	NULL	NULL	NULL	NULL	NULL	NULL	NULL	NULL	NULL	NULL
12427128	21052129	74	1	WHITE	Medicare	English	MARRIED	3.45	K/uL	3.87	m/uL	2.09	K/uL	1.09	K/uL	163.5	K/uL	11.25	g/dL	15.3	%	33.2	%	NULL	NULL	NULL	NULL	NULL	NULL	131	mEq/L	3.85	mEq/L	7.75	mg/dL	99	mEq/L	140	mg/dL	NULL	NULL	11.5	mEq/L	NULL	NULL	NULL	NULL	NULL	NULL
12427529	25503913	72	1	WHITE	Medicare	English	NULL	6.7	K/uL	4	m/uL	NULL	NULL	NULL	NULL	296	K/uL	11.9	g/dL	13.6	%	37.4	%	2.6	g/dL	NULL	NULL	NULL	NULL	150	mEq/L	4.2	mEq/L	8.4	mg/dL	116	mEq/L	134	mg/dL	NULL	NULL	11	mEq/L	NULL	NULL	NULL	NULL	NULL	NULL
12430526	28703377	70	0	WHITE	Medicare	English	MARRIED	15.2	K/uL	3.79	m/uL	15.96	K/uL	0.97	K/uL	188.75	K/uL	10.73	g/dL	13.88	%	33.58	%	NULL	NULL	NULL	NULL	NULL	NULL	136	mEq/L	4.37	mEq/L	8.53	mg/dL	102	mEq/L	206.33	mg/dL	NULL	NULL	14	mEq/L	NULL	NULL	NULL	NULL	NULL	NULL
12430647	25808717	65	1	AMERICAN INDIAN/ALASKA NATIVE	Private	English	SINGLE	NULL	NULL	NULL	NULL	NULL	NULL	NULL	NULL	NULL	NULL	NULL	NULL	NULL	NULL	NULL	NULL	NULL	NULL	NULL	NULL	NULL	NULL	150	mEq/L	3.87	mEq/L	NULL	NULL	107	mEq/L	NULL	NULL	NULL	NULL	12	mEq/L	7.35	units	58.5	mm Hg	112.25	mm Hg
12432990	23518275	79	1	WHITE	Medicare	English	MARRIED	21.77	K/uL	2.77	m/uL	14.79	K/uL	1.25	K/uL	100.43	K/uL	8.37	g/dL	14.97	%	27.41	%	NULL	NULL	NULL	NULL	NULL	NULL	142.67	mEq/L	5.87	mEq/L	7.9	mg/dL	111	mEq/L	134.67	mg/dL	NULL	NULL	15.67	mEq/L	7.22	units	49	mm Hg	22	mm Hg
12437680	23640589	91	0	WHITE	Medicare	English	SINGLE	10	K/uL	2.6	m/uL	NULL	NULL	NULL	NULL	139.5	K/uL	7.85	g/dL	14.7	%	24.9	%	3.2	g/dL	NULL	NULL	NULL	NULL	141	mEq/L	3.7	mEq/L	8	mg/dL	100.5	mEq/L	125	mg/dL	7.1	%	23	mEq/L	NULL	NULL	NULL	NULL	NULL	NULL
12437994	23870904	67	0	AMERICAN INDIAN/ALASKA NATIVE	Medicaid	English	SINGLE	8.2	K/uL	2.98	m/uL	NULL	NULL	NULL	NULL	226	K/uL	9.2	g/dL	13.3	%	30.9	%	NULL	NULL	NULL	NULL	NULL	NULL	140	mEq/L	4	mEq/L	9	mg/dL	98	mEq/L	93	mg/dL	NULL	NULL	9	mEq/L	NULL	NULL	NULL	NULL	NULL	NULL
12442425	27600090	77	1	UNKNOWN	Medicare	English	SINGLE	8.75	K/uL	3.72	m/uL	NULL	NULL	NULL	NULL	183	K/uL	10.6	g/dL	14.35	%	32	%	NULL	NULL	NULL	NULL	NULL	NULL	142	mEq/L	3.6	mEq/L	8.8	mg/dL	97.5	mEq/L	NULL	NULL	NULL	NULL	13.5	mEq/L	NULL	NULL	NULL	NULL	NULL	NULL
12455327	24654699	63	1	WHITE	Medicare	English	SINGLE	8.95	K/uL	3.2	m/uL	6.28	K/uL	0.94	K/uL	255.5	K/uL	8.55	g/dL	18.25	%	28.75	%	NULL	NULL	NULL	NULL	NULL	NULL	133	mEq/L	4.75	mEq/L	8.25	mg/dL	95	mEq/L	120	mg/dL	NULL	NULL	18.5	mEq/L	NULL	NULL	NULL	NULL	NULL	NULL
12459376	27528906	58	1	WHITE	Medicaid	English	SINGLE	19.95	K/uL	3.61	m/uL	19.28	K/uL	1.13	K/uL	519	K/uL	10.75	g/dL	17.85	%	34.7	%	NULL	NULL	NULL	NULL	6.2	g/dL	131.67	mEq/L	4.97	mEq/L	9.4	mg/dL	94	mEq/L	237.33	mg/dL	NULL	NULL	11.33	mEq/L	7.4	units	44	mm Hg	174	mm Hg
12460308	21566928	80	1	UNKNOWN	Medicare	English	MARRIED	8.1	K/uL	6.21	m/uL	NULL	NULL	NULL	NULL	253	K/uL	11.3	g/dL	18.5	%	38.9	%	NULL	NULL	NULL	NULL	NULL	NULL	135	mEq/L	4.1	mEq/L	NULL	NULL	102	mEq/L	NULL	NULL	NULL	NULL	11	mEq/L	NULL	NULL	NULL	NULL	NULL	NULL
12461386	25988360	73	1	OTHER	Medicare	English	MARRIED	11.6	K/uL	3.71	m/uL	NULL	NULL	NULL	NULL	206	K/uL	11.6	g/dL	12.6	%	36.5	%	3.3	g/dL	NULL	NULL	NULL	NULL	135	mEq/L	4.3	mEq/L	8.8	mg/dL	101	mEq/L	136	mg/dL	5.6	%	13	mEq/L	7.35	units	56	mm Hg	82	mm Hg
12467121	23077745	72	1	WHITE	Medicare	English	NULL	4.45	K/uL	3.7	m/uL	2.73	K/uL	0.67	K/uL	169.5	K/uL	10.05	g/dL	14.6	%	33.65	%	3.3	g/dL	NULL	NULL	NULL	NULL	139.5	mEq/L	4.2	mEq/L	9.05	mg/dL	103	mEq/L	235	mg/dL	NULL	NULL	10.5	mEq/L	NULL	NULL	NULL	NULL	NULL	NULL
12467253	23053404	77	0	WHITE	Medicare	English	WIDOWED	10.3	K/uL	4.59	m/uL	NULL	NULL	NULL	NULL	269	K/uL	11.5	g/dL	17.3	%	38	%	NULL	NULL	NULL	NULL	NULL	NULL	136	mEq/L	4.2	mEq/L	8.6	mg/dL	103	mEq/L	139	mg/dL	NULL	NULL	11	mEq/L	NULL	NULL	NULL	NULL	NULL	NULL
12468221	29347989	85	1	WHITE	Medicare	English	NULL	13.1	K/uL	3.2	m/uL	NULL	NULL	NULL	NULL	250.5	K/uL	8.85	g/dL	14.65	%	28.65	%	3.3	g/dL	NULL	NULL	NULL	NULL	145.5	mEq/L	3.95	mEq/L	9.5	mg/dL	115	mEq/L	111	mg/dL	NULL	NULL	13.5	mEq/L	NULL	NULL	NULL	NULL	NULL	NULL
12468375	23176281	71	0	WHITE	Medicare	English	MARRIED	NULL	NULL	NULL	NULL	NULL	NULL	NULL	NULL	NULL	NULL	NULL	NULL	NULL	NULL	NULL	NULL	NULL	NULL	NULL	NULL	NULL	NULL	NULL	NULL	NULL	NULL	NULL	NULL	NULL	NULL	NULL	NULL	NULL	NULL	NULL	NULL	NULL	NULL	NULL	NULL	NULL	NULL
12491500	23472608	90	0	WHITE	Medicare	English	SINGLE	13.8	K/uL	4.22	m/uL	NULL	NULL	NULL	NULL	231	K/uL	11.9	g/dL	13.6	%	37.5	%	NULL	NULL	NULL	NULL	NULL	NULL	140	mEq/L	4.3	mEq/L	NULL	NULL	105	mEq/L	122	mg/dL	5.9	%	10	mEq/L	NULL	NULL	NULL	NULL	NULL	NULL
12504470	26679156	76	1	WHITE	Medicare	English	SINGLE	8.7	K/uL	3.7	m/uL	NULL	NULL	NULL	NULL	214	K/uL	10.6	g/dL	13.8	%	32.6	%	NULL	NULL	NULL	NULL	NULL	NULL	140	mEq/L	4.3	mEq/L	8.9	mg/dL	100	mEq/L	196	mg/dL	NULL	NULL	16	mEq/L	7.28	units	55	mm Hg	43	mm Hg
12508471	22860923	68	1	WHITE	Private	English	MARRIED	NULL	NULL	NULL	NULL	NULL	NULL	NULL	NULL	NULL	NULL	NULL	NULL	NULL	NULL	NULL	NULL	NULL	NULL	NULL	NULL	NULL	NULL	NULL	NULL	NULL	NULL	NULL	NULL	NULL	NULL	NULL	NULL	NULL	NULL	NULL	NULL	NULL	NULL	NULL	NULL	NULL	NULL
12509691	29569285	65	1	WHITE	Medicaid	English	DIVORCED	19.9	K/uL	3.57	m/uL	17.25	K/uL	1.06	K/uL	188	K/uL	10.93	g/dL	13.17	%	32.63	%	3.2	g/dL	NULL	NULL	NULL	NULL	141.33	mEq/L	4.5	mEq/L	7.4	mg/dL	102.33	mEq/L	187.67	mg/dL	NULL	NULL	14.33	mEq/L	7.36	units	51.5	mm Hg	91.33	mm Hg
12511162	21000571	78	1	WHITE	Medicare	English	MARRIED	9.4	K/uL	4.44	m/uL	6.49	K/uL	1.51	K/uL	226.5	K/uL	14.85	g/dL	16.9	%	43.65	%	3.5	g/dL	NULL	NULL	NULL	NULL	137	mEq/L	4.8	mEq/L	9.05	mg/dL	100.5	mEq/L	108	mg/dL	6.5	%	13	mEq/L	NULL	NULL	NULL	NULL	NULL	NULL
12515381	28178107	55	1	WHITE	Private	English	MARRIED	18.56	K/uL	5.28	m/uL	10.32	K/uL	0.75	K/uL	225	K/uL	15.32	g/dL	16.14	%	48.92	%	NULL	NULL	NULL	NULL	NULL	NULL	133.2	mEq/L	5.64	mEq/L	8.24	mg/dL	94.8	mEq/L	184.2	mg/dL	6.85	%	18.8	mEq/L	7.31	units	41.75	mm Hg	109.75	mm Hg
12517437	20558233	77	0	UNKNOWN	Medicare	English	NULL	10.55	K/uL	3.12	m/uL	NULL	NULL	NULL	NULL	347.5	K/uL	9.6	g/dL	15.25	%	33.25	%	NULL	NULL	NULL	NULL	NULL	NULL	142.5	mEq/L	4.2	mEq/L	9.15	mg/dL	100	mEq/L	142	mg/dL	NULL	NULL	11	mEq/L	7.35	units	63	mm Hg	78.5	mm Hg
12524743	26847405	60	1	WHITE	Medicare	English	DIVORCED	20.08	K/uL	3.07	m/uL	22.29	K/uL	0.87	K/uL	206	K/uL	8.78	g/dL	15.38	%	27.2	%	NULL	NULL	NULL	NULL	NULL	NULL	135.25	mEq/L	5.23	mEq/L	7.13	mg/dL	103.5	mEq/L	209.5	mg/dL	NULL	NULL	13	mEq/L	7.33	units	37.67	mm Hg	107	mm Hg
12525679	21766169	74	0	WHITE	Medicare	English	SINGLE	13.15	K/uL	3.22	m/uL	NULL	NULL	NULL	NULL	157	K/uL	8.23	g/dL	18.38	%	28.43	%	NULL	NULL	NULL	NULL	NULL	NULL	137.67	mEq/L	4.03	mEq/L	9.23	mg/dL	95.33	mEq/L	233	mg/dL	NULL	NULL	13	mEq/L	7.43	units	48	mm Hg	101	mm Hg
12531324	25026879	75	0	WHITE	Medicare	English	DIVORCED	11.25	K/uL	3.88	m/uL	10.51	K/uL	0.3	K/uL	179.5	K/uL	11.35	g/dL	12.2	%	36.35	%	3.9	g/dL	NULL	NULL	NULL	NULL	133.5	mEq/L	4.75	mEq/L	9.35	mg/dL	98	mEq/L	282	mg/dL	7.7	%	12.5	mEq/L	NULL	NULL	NULL	NULL	NULL	NULL
12535246	25368294	66	0	WHITE	Medicare	English	MARRIED	6.9	K/uL	2.3	m/uL	NULL	NULL	NULL	NULL	256	K/uL	5.95	g/dL	15.1	%	20.6	%	2.6	g/dL	NULL	NULL	6.7	g/dL	142	mEq/L	3.4	mEq/L	7.6	mg/dL	104	mEq/L	103	mg/dL	NULL	NULL	12	mEq/L	NULL	NULL	NULL	NULL	NULL	NULL
12537730	29019600	68	0	UNKNOWN	Medicare	English	NULL	NULL	NULL	NULL	NULL	NULL	NULL	NULL	NULL	NULL	NULL	NULL	NULL	NULL	NULL	NULL	NULL	NULL	NULL	NULL	NULL	NULL	NULL	NULL	NULL	NULL	NULL	NULL	NULL	NULL	NULL	NULL	NULL	NULL	NULL	NULL	NULL	NULL	NULL	NULL	NULL	NULL	NULL
12537856	20331035	69	1	UNKNOWN	Private	English	NULL	NULL	NULL	NULL	NULL	NULL	NULL	NULL	NULL	NULL	NULL	NULL	NULL	NULL	NULL	NULL	NULL	NULL	NULL	NULL	NULL	NULL	NULL	NULL	NULL	NULL	NULL	NULL	NULL	NULL	NULL	NULL	NULL	NULL	NULL	NULL	NULL	NULL	NULL	NULL	NULL	NULL	NULL
12541703	25366754	67	0	WHITE	Medicare	English	MARRIED	8.5	K/uL	4.89	m/uL	NULL	NULL	NULL	NULL	269	K/uL	13.3	g/dL	14.6	%	45.4	%	NULL	NULL	NULL	NULL	NULL	NULL	145.5	mEq/L	4.7	mEq/L	8.65	mg/dL	98	mEq/L	93.5	mg/dL	NULL	NULL	14	mEq/L	7.34	units	68	mm Hg	76.67	mm Hg
12551142	21253518	74	0	PATIENT DECLINED TO ANSWER	Medicare	English	MARRIED	NULL	NULL	NULL	NULL	NULL	NULL	NULL	NULL	NULL	NULL	NULL	NULL	NULL	NULL	NULL	NULL	NULL	NULL	NULL	NULL	NULL	NULL	NULL	NULL	NULL	NULL	NULL	NULL	NULL	NULL	NULL	NULL	NULL	NULL	NULL	NULL	NULL	NULL	NULL	NULL	NULL	NULL
12553166	20173765	79	1	WHITE	Medicaid	Russian	MARRIED	8.2	K/uL	4.08	m/uL	NULL	NULL	NULL	NULL	NULL	K/uL	11.7	g/dL	14.1	%	36.1	%	NULL	NULL	NULL	NULL	NULL	NULL	140	mEq/L	4	mEq/L	9	mg/dL	103	mEq/L	122	mg/dL	NULL	NULL	13	mEq/L	NULL	NULL	NULL	NULL	NULL	NULL
12558118	29051400	74	1	WHITE	Medicare	English	MARRIED	6.5	K/uL	2.45	m/uL	NULL	NULL	NULL	NULL	73	K/uL	6.4	g/dL	15.3	%	20.5	%	NULL	NULL	NULL	NULL	NULL	NULL	130	mEq/L	5.5	mEq/L	NULL	NULL	99	mEq/L	186	mg/dL	NULL	NULL	17	mEq/L	NULL	NULL	NULL	NULL	NULL	NULL
12566624	24141945	69	0	WHITE	Medicare	English	SINGLE	8.8	K/uL	3.65	m/uL	NULL	NULL	NULL	NULL	197	K/uL	10.2	g/dL	13.8	%	33.6	%	NULL	NULL	NULL	NULL	NULL	NULL	142	mEq/L	4.2	mEq/L	9.8	mg/dL	94	mEq/L	228	mg/dL	NULL	NULL	15	mEq/L	NULL	NULL	NULL	NULL	NULL	NULL
12567941	21650559	68	0	WHITE	Medicare	English	MARRIED	NULL	NULL	NULL	NULL	NULL	NULL	NULL	NULL	NULL	NULL	NULL	NULL	NULL	NULL	NULL	NULL	NULL	NULL	NULL	NULL	NULL	NULL	NULL	NULL	NULL	NULL	NULL	NULL	NULL	NULL	NULL	NULL	NULL	NULL	NULL	NULL	NULL	NULL	NULL	NULL	NULL	NULL
12571163	25943143	66	1	WHITE	Private	English	WIDOWED	20.5	K/uL	3.62	m/uL	NULL	NULL	NULL	NULL	214	K/uL	11.6	g/dL	13.5	%	35.3	%	NULL	NULL	NULL	NULL	NULL	NULL	136	mEq/L	4.8	mEq/L	8.1	mg/dL	100	mEq/L	146	mg/dL	NULL	NULL	16	mEq/L	NULL	NULL	NULL	NULL	NULL	NULL
12576264	28639614	79	1	WHITE	Medicare	English	MARRIED	10.6	K/uL	3.44	m/uL	NULL	NULL	NULL	NULL	237.5	K/uL	11.65	g/dL	15.75	%	35.25	%	NULL	NULL	NULL	NULL	NULL	NULL	142	mEq/L	4.08	mEq/L	8.57	mg/dL	104.5	mEq/L	196	mg/dL	NULL	NULL	14.25	mEq/L	7.34	units	63.17	mm Hg	67.67	mm Hg
12588040	23173225	85	1	OTHER	Medicaid	Vietnamese	MARRIED	20.5	K/uL	3.9	m/uL	13.55	K/uL	4.24	K/uL	178	K/uL	11.57	g/dL	14.23	%	36.33	%	NULL	NULL	NULL	NULL	NULL	NULL	140.33	mEq/L	3.97	mEq/L	7.83	mg/dL	108	mEq/L	139	mg/dL	NULL	NULL	15	mEq/L	7.26	units	54.5	mm Hg	114	mm Hg
12591291	20661734	89	1	WHITE	Medicare	English	MARRIED	7.4	K/uL	4.02	m/uL	NULL	NULL	NULL	NULL	168	K/uL	13.7	g/dL	13.8	%	40.7	%	NULL	NULL	NULL	NULL	NULL	NULL	134.5	mEq/L	3.9	mEq/L	8.75	mg/dL	96	mEq/L	123	mg/dL	NULL	NULL	18	mEq/L	NULL	NULL	NULL	NULL	NULL	NULL
12601592	26786631	68	1	WHITE	Medicaid	English	SINGLE	8.6	K/uL	3.7	m/uL	NULL	NULL	NULL	NULL	210	K/uL	11.2	g/dL	12.6	%	33.3	%	NULL	NULL	NULL	NULL	NULL	NULL	134.5	mEq/L	4.35	mEq/L	8.6	mg/dL	99	mEq/L	162	mg/dL	NULL	NULL	11.5	mEq/L	NULL	NULL	NULL	NULL	NULL	NULL
12604362	28341330	78	0	WHITE	Medicare	English	DIVORCED	14.2	K/uL	4.11	m/uL	NULL	NULL	NULL	NULL	227	K/uL	11.6	g/dL	15	%	37	%	NULL	NULL	NULL	NULL	6.6	g/dL	136.5	mEq/L	3.7	mEq/L	8.9	mg/dL	97.5	mEq/L	140	mg/dL	5.8	%	14	mEq/L	NULL	NULL	NULL	NULL	NULL	NULL
12610165	21716904	86	0	WHITE	Medicare	English	WIDOWED	8.55	K/uL	2.87	m/uL	7.4	K/uL	0.72	K/uL	339.5	K/uL	8.85	g/dL	14.7	%	26.85	%	3.75	g/dL	NULL	NULL	NULL	NULL	133.5	mEq/L	4.15	mEq/L	9.35	mg/dL	97.5	mEq/L	142	mg/dL	NULL	NULL	13	mEq/L	NULL	NULL	NULL	NULL	NULL	NULL
12626136	20070470	73	1	WHITE	Private	English	MARRIED	14.7	K/uL	4.77	m/uL	NULL	NULL	NULL	NULL	208	K/uL	14	g/dL	17.8	%	43.8	%	NULL	NULL	NULL	NULL	7.8	g/dL	130.5	mEq/L	5.5	mEq/L	8	mg/dL	86.5	mEq/L	170.5	mg/dL	NULL	NULL	29.5	mEq/L	NULL	NULL	NULL	NULL	NULL	NULL
12634384	28856516	83	1	WHITE	Medicare	English	DIVORCED	7	K/uL	4.58	m/uL	NULL	NULL	NULL	NULL	137	K/uL	13.1	g/dL	13.3	%	39.3	%	NULL	NULL	NULL	NULL	NULL	NULL	137	mEq/L	4.1	mEq/L	8.4	mg/dL	104	mEq/L	164	mg/dL	NULL	NULL	9	mEq/L	NULL	NULL	NULL	NULL	NULL	NULL
12639950	22197005	83	1	WHITE - OTHER EUROPEAN	Medicare	English	SINGLE	14.9	K/uL	4.89	m/uL	NULL	NULL	NULL	NULL	185	K/uL	14.4	g/dL	13.5	%	44.2	%	4.2	g/dL	NULL	NULL	NULL	NULL	136	mEq/L	4.7	mEq/L	9.3	mg/dL	101	mEq/L	115	mg/dL	NULL	NULL	14	mEq/L	NULL	NULL	NULL	NULL	NULL	NULL
12641109	26870095	71	0	UNKNOWN	Medicare	English	NULL	NULL	NULL	NULL	NULL	NULL	NULL	NULL	NULL	NULL	NULL	NULL	NULL	NULL	NULL	NULL	NULL	NULL	NULL	NULL	NULL	NULL	NULL	139.5	mEq/L	4.35	mEq/L	8.15	mg/dL	102	mEq/L	144.5	mg/dL	NULL	NULL	10	mEq/L	NULL	NULL	NULL	NULL	NULL	NULL
12646602	29978055	70	1	WHITE	Medicare	English	MARRIED	7.25	K/uL	3.37	m/uL	NULL	NULL	NULL	NULL	239	K/uL	9.6	g/dL	13	%	30.15	%	NULL	NULL	NULL	NULL	NULL	NULL	141.5	mEq/L	3.65	mEq/L	8.5	mg/dL	107	mEq/L	96.5	mg/dL	NULL	NULL	15	mEq/L	NULL	NULL	NULL	NULL	NULL	NULL
12650680	28785177	87	0	NATIVE HAWAIIAN OR OTHER PACIFIC ISLANDER	Medicare	English	WIDOWED	5	K/uL	3.99	m/uL	3.1	K/uL	0.76	K/uL	171	K/uL	11	g/dL	14.9	%	34.7	%	3.8	g/dL	NULL	NULL	NULL	NULL	135	mEq/L	4.5	mEq/L	8.7	mg/dL	100	mEq/L	307	mg/dL	10.2	%	15	mEq/L	NULL	NULL	NULL	NULL	NULL	NULL
12656796	25949570	70	1	UNKNOWN	Medicare	English	NULL	NULL	NULL	NULL	NULL	NULL	NULL	NULL	NULL	174	K/uL	NULL	NULL	NULL	NULL	35	%	NULL	NULL	NULL	NULL	NULL	NULL	NULL	NULL	4.6	mEq/L	NULL	NULL	NULL	NULL	NULL	NULL	NULL	NULL	NULL	NULL	NULL	NULL	NULL	NULL	NULL	NULL
12660800	22501115	70	1	WHITE	Medicare	English	MARRIED	10.15	K/uL	4.45	m/uL	7.66	K/uL	1.44	K/uL	129.5	K/uL	12.95	g/dL	13.2	%	38.35	%	NULL	NULL	NULL	NULL	NULL	NULL	134.67	mEq/L	4.23	mEq/L	9.03	mg/dL	97	mEq/L	254.33	mg/dL	NULL	NULL	19	mEq/L	7.36	units	48	mm Hg	50	mm Hg
12660845	21702404	74	1	WHITE	Medicare	English	DIVORCED	11	K/uL	3.47	m/uL	NULL	NULL	NULL	NULL	237	K/uL	11.4	g/dL	13.6	%	35.5	%	NULL	NULL	NULL	NULL	NULL	NULL	137	mEq/L	4.7	mEq/L	NULL	NULL	102	mEq/L	163	mg/dL	NULL	NULL	8	mEq/L	NULL	NULL	NULL	NULL	NULL	NULL
12669559	25408632	64	1	WHITE	Medicare	English	MARRIED	88.97	K/uL	3.6	m/uL	10	K/uL	0.92	K/uL	142.33	K/uL	10.47	g/dL	18.8	%	33.37	%	3.9	g/dL	NULL	NULL	NULL	NULL	141.33	mEq/L	3.73	mEq/L	8.33	mg/dL	106	mEq/L	139.5	mg/dL	NULL	NULL	10.67	mEq/L	NULL	NULL	NULL	NULL	NULL	NULL
12678405	27531811	69	1	WHITE	Medicare	English	MARRIED	7.6	K/uL	3.85	m/uL	NULL	NULL	NULL	NULL	135	K/uL	11.6	g/dL	12.2	%	35.8	%	NULL	NULL	NULL	NULL	NULL	NULL	140	mEq/L	4.6	mEq/L	9.1	mg/dL	104	mEq/L	159	mg/dL	NULL	NULL	14	mEq/L	NULL	NULL	NULL	NULL	NULL	NULL
12679327	29577611	80	1	WHITE	Other	English	MARRIED	1.77	K/uL	2.23	m/uL	0.42	K/uL	1.19	K/uL	77.33	K/uL	7.07	g/dL	15.53	%	20.33	%	3.8	g/dL	NULL	NULL	NULL	NULL	135.67	mEq/L	4.17	mEq/L	8.7	mg/dL	102.33	mEq/L	230.33	mg/dL	NULL	NULL	9.33	mEq/L	NULL	NULL	NULL	NULL	NULL	NULL
12690182	26628083	80	1	WHITE	Private	English	MARRIED	8.7	K/uL	3.6	m/uL	NULL	NULL	NULL	NULL	116	K/uL	10.3	g/dL	15.2	%	33	%	NULL	NULL	NULL	NULL	NULL	NULL	139	mEq/L	4.4	mEq/L	8.4	mg/dL	99	mEq/L	99	mg/dL	NULL	NULL	16	mEq/L	NULL	NULL	NULL	NULL	NULL	NULL
12691437	27963677	64	1	WHITE	Medicaid	Modern Greek (1453-)	MARRIED	14.45	K/uL	4.44	m/uL	10.54	K/uL	1.32	K/uL	307.5	K/uL	12.75	g/dL	12.4	%	39	%	NULL	NULL	NULL	NULL	NULL	NULL	139	mEq/L	4.3	mEq/L	9	mg/dL	98.5	mEq/L	155	mg/dL	NULL	NULL	14	mEq/L	7.41	units	41	mm Hg	50	mm Hg
12693636	28334016	72	0	WHITE	Medicare	English	MARRIED	7.95	K/uL	2.96	m/uL	NULL	NULL	NULL	NULL	169	K/uL	8.95	g/dL	16.4	%	28.2	%	NULL	NULL	NULL	NULL	NULL	NULL	140	mEq/L	3.75	mEq/L	8.45	mg/dL	102.5	mEq/L	170	mg/dL	NULL	NULL	11	mEq/L	7.39	units	45.83	mm Hg	183.17	mm Hg
12693747	20464768	92	0	BLACK/AFRICAN AMERICAN	Medicaid	English	NULL	6.7	K/uL	3.88	m/uL	NULL	NULL	NULL	NULL	216	K/uL	9.3	g/dL	15.3	%	30.2	%	NULL	NULL	NULL	NULL	NULL	NULL	138	mEq/L	4.5	mEq/L	9.3	mg/dL	103	mEq/L	97	mg/dL	NULL	NULL	16	mEq/L	NULL	NULL	NULL	NULL	NULL	NULL
12715737	24751193	75	0	UNABLE TO OBTAIN	Medicare	English	NULL	6.5	K/uL	4.65	m/uL	NULL	NULL	NULL	NULL	281	K/uL	12.5	g/dL	14.1	%	40	%	4.05	g/dL	NULL	NULL	NULL	NULL	137	mEq/L	3.7	mEq/L	NULL	NULL	101	mEq/L	94	mg/dL	5.6	%	10	mEq/L	NULL	NULL	NULL	NULL	NULL	NULL
12716132	21524754	91	0	UNKNOWN	Medicaid	Haitian	NULL	8.9	K/uL	4.33	m/uL	NULL	NULL	NULL	NULL	162	K/uL	11.4	g/dL	16	%	37.3	%	NULL	NULL	NULL	NULL	NULL	NULL	137.5	mEq/L	5.1	mEq/L	9.15	mg/dL	105.5	mEq/L	216.5	mg/dL	NULL	NULL	10.5	mEq/L	7.34	units	45.5	mm Hg	53	mm Hg
12728493	29546533	53	1	UNABLE TO OBTAIN	Medicaid	English	SINGLE	6.85	K/uL	4.34	m/uL	NULL	NULL	NULL	NULL	221.5	K/uL	12.75	g/dL	14.1	%	38.85	%	NULL	NULL	NULL	NULL	7.8	g/dL	133	mEq/L	3.75	mEq/L	9.2	mg/dL	96	mEq/L	207	mg/dL	10.3	%	13	mEq/L	NULL	NULL	NULL	NULL	NULL	NULL
12736808	24262738	75	1	WHITE	Medicare	English	SINGLE	13.15	K/uL	4.72	m/uL	NULL	NULL	NULL	NULL	222	K/uL	12.5	g/dL	15.1	%	39.2	%	NULL	NULL	NULL	NULL	NULL	NULL	138.5	mEq/L	3.8	mEq/L	9.8	mg/dL	95.5	mEq/L	160	mg/dL	NULL	NULL	18	mEq/L	NULL	NULL	NULL	NULL	NULL	NULL
12742483	28454479	91	1	WHITE - RUSSIAN	Medicare	Russian	SINGLE	8.8	K/uL	3.53	m/uL	NULL	NULL	NULL	NULL	134	K/uL	11.1	g/dL	15.2	%	35.6	%	3	g/dL	NULL	NULL	NULL	NULL	137	mEq/L	4	mEq/L	9.3	mg/dL	93.5	mEq/L	170	mg/dL	NULL	NULL	11	mEq/L	7.51	units	47.5	mm Hg	133.5	mm Hg
12744846	26889784	51	1	HISPANIC/LATINO - GUATEMALAN	Medicaid	English	SINGLE	7.3	K/uL	3.11	m/uL	NULL	NULL	NULL	NULL	178	K/uL	9.7	g/dL	14.3	%	29.8	%	NULL	NULL	NULL	NULL	NULL	NULL	137	mEq/L	3.9	mEq/L	8.5	mg/dL	101	mEq/L	301	mg/dL	NULL	NULL	13	mEq/L	NULL	NULL	NULL	NULL	NULL	NULL
12748022	24649869	70	0	UNABLE TO OBTAIN	Private	English	MARRIED	10.55	K/uL	3.51	m/uL	9.75	K/uL	0.3	K/uL	280	K/uL	10.6	g/dL	16.25	%	33.75	%	3.3	g/dL	NULL	NULL	NULL	NULL	133	mEq/L	4.3	mEq/L	8.15	mg/dL	95	mEq/L	231	mg/dL	NULL	NULL	12.5	mEq/L	7.29	units	58.8	mm Hg	37	mm Hg
12755187	26865624	85	1	UNKNOWN	Medicare	English	MARRIED	14.37	K/uL	3.06	m/uL	NULL	NULL	NULL	NULL	168.33	K/uL	8.9	g/dL	16.4	%	29.03	%	NULL	NULL	NULL	NULL	NULL	NULL	144.67	mEq/L	4.27	mEq/L	8.03	mg/dL	113.67	mEq/L	253	mg/dL	7	%	9	mEq/L	7.29	units	48.5	mm Hg	49.5	mm Hg
12755896	28622471	72	1	OTHER	Medicaid	Persian	WIDOWED	8.3	K/uL	3.2	m/uL	5.49	K/uL	1.76	K/uL	164	K/uL	9.6	g/dL	13.75	%	28.4	%	3.8	g/dL	NULL	NULL	NULL	NULL	135	mEq/L	4.1	mEq/L	NULL	NULL	99	mEq/L	163	mg/dL	6.7	%	15	mEq/L	7.44	units	39.5	mm Hg	300.5	mm Hg
12760409	26168992	72	0	WHITE	Medicare	English	MARRIED	7.6	K/uL	3.32	m/uL	NULL	NULL	NULL	NULL	255	K/uL	10.9	g/dL	13.8	%	35.2	%	2.8	g/dL	NULL	NULL	NULL	NULL	143	mEq/L	5.8	mEq/L	8.6	mg/dL	111	mEq/L	83	mg/dL	NULL	NULL	9	mEq/L	7.25	units	51	mm Hg	75	mm Hg
12765205	28271117	92	1	WHITE	Medicare	English	MARRIED	NULL	NULL	NULL	NULL	NULL	NULL	NULL	NULL	NULL	NULL	NULL	NULL	NULL	NULL	NULL	NULL	NULL	NULL	NULL	NULL	NULL	NULL	136	mEq/L	3.8	mEq/L	7.9	mg/dL	95	mEq/L	209	mg/dL	NULL	NULL	13	mEq/L	7.42	units	49	mm Hg	43	mm Hg
12769839	21768547	82	1	NATIVE HAWAIIAN OR OTHER PACIFIC ISLANDER	Medicare	English	WIDOWED	6.1	K/uL	3.84	m/uL	NULL	NULL	NULL	NULL	130	K/uL	11.4	g/dL	14.6	%	35.1	%	NULL	NULL	NULL	NULL	NULL	NULL	140	mEq/L	3.6	mEq/L	8.9	mg/dL	103	mEq/L	156	mg/dL	NULL	NULL	14	mEq/L	NULL	NULL	NULL	NULL	NULL	NULL
12773948	23343004	59	0	UNKNOWN	Medicaid	English	NULL	12.35	K/uL	5.52	m/uL	11.11	K/uL	0.76	K/uL	200	K/uL	15.9	g/dL	14.45	%	49	%	NULL	NULL	NULL	NULL	NULL	NULL	137.5	mEq/L	3.8	mEq/L	10.15	mg/dL	98.5	mEq/L	449	mg/dL	NULL	NULL	14.5	mEq/L	7.42	units	43	mm Hg	226	mm Hg
12784387	27475850	76	0	WHITE	Medicare	English	MARRIED	8.07	K/uL	2.57	m/uL	6.1	K/uL	1.29	K/uL	182.67	K/uL	7.9	g/dL	16.93	%	23.63	%	3.95	g/dL	NULL	NULL	6.4	g/dL	135.5	mEq/L	5.45	mEq/L	8.7	mg/dL	93	mEq/L	173.5	mg/dL	NULL	NULL	20.5	mEq/L	NULL	NULL	NULL	NULL	NULL	NULL
12792189	24844628	64	0	UNKNOWN	Private	English	DIVORCED	25.77	K/uL	3.13	m/uL	NULL	NULL	NULL	NULL	150.67	K/uL	9.7	g/dL	14.27	%	29.6	%	NULL	NULL	NULL	NULL	NULL	NULL	140.33	mEq/L	3.67	mEq/L	8	mg/dL	110	mEq/L	132.67	mg/dL	NULL	NULL	11.33	mEq/L	7.28	units	40	mm Hg	184.71	mm Hg
12804273	26807648	63	1	UNKNOWN	Medicare	Spanish	MARRIED	8.45	K/uL	3.58	m/uL	NULL	NULL	NULL	NULL	161	K/uL	10.45	g/dL	14.1	%	32.2	%	3.3	g/dL	2.3	g/dL	5.6	g/dL	138.67	mEq/L	5.45	mEq/L	8.2	mg/dL	105	mEq/L	400.25	mg/dL	NULL	NULL	10	mEq/L	NULL	NULL	NULL	NULL	NULL	NULL
12808425	27695694	75	0	UNKNOWN	Medicare	English	NULL	10.35	K/uL	4.3	m/uL	8.93	K/uL	0.5	K/uL	218.5	K/uL	11.1	g/dL	17.2	%	35.1	%	4	g/dL	NULL	NULL	NULL	NULL	142	mEq/L	4	mEq/L	9.45	mg/dL	97.5	mEq/L	138.5	mg/dL	NULL	NULL	14	mEq/L	NULL	NULL	NULL	NULL	NULL	NULL
12809912	29647276	77	1	UNKNOWN	Medicare	English	NULL	10.3	K/uL	4.23	m/uL	8.9	K/uL	0.68	K/uL	203	K/uL	13	g/dL	13.4	%	39.6	%	NULL	NULL	NULL	NULL	NULL	NULL	138	mEq/L	4.1	mEq/L	9.2	mg/dL	100	mEq/L	235	mg/dL	6.8	%	18	mEq/L	NULL	NULL	NULL	NULL	NULL	NULL
12814011	22656225	64	0	OTHER	Private	English	MARRIED	NULL	NULL	NULL	NULL	NULL	NULL	NULL	NULL	NULL	NULL	NULL	NULL	NULL	NULL	NULL	NULL	NULL	NULL	NULL	NULL	NULL	NULL	NULL	NULL	NULL	NULL	NULL	NULL	NULL	NULL	NULL	NULL	NULL	NULL	NULL	NULL	NULL	NULL	NULL	NULL	NULL	NULL
12815098	26755531	63	1	HISPANIC/LATINO - PUERTO RICAN	Medicaid	English	SINGLE	6.7	K/uL	5.37	m/uL	NULL	NULL	NULL	NULL	136	K/uL	15.9	g/dL	13.7	%	46.8	%	NULL	NULL	NULL	NULL	NULL	NULL	139	mEq/L	4.4	mEq/L	9.4	mg/dL	103	mEq/L	138	mg/dL	7.7	%	14	mEq/L	NULL	NULL	NULL	NULL	NULL	NULL
12818267	27345922	66	0	WHITE	Medicare	English	WIDOWED	15.13	K/uL	4.27	m/uL	15.21	K/uL	1.35	K/uL	246.5	K/uL	12.74	g/dL	12.83	%	37.28	%	4.05	g/dL	NULL	NULL	NULL	NULL	135.75	mEq/L	4.05	mEq/L	9.15	mg/dL	95.5	mEq/L	154.25	mg/dL	NULL	NULL	14	mEq/L	7.38	units	49	mm Hg	85.6	mm Hg
12822447	20995688	85	1	HISPANIC/LATINO - DOMINICAN	Medicaid	English	MARRIED	7.6	K/uL	4.61	m/uL	NULL	NULL	NULL	NULL	307	K/uL	14.1	g/dL	13.2	%	41.1	%	NULL	NULL	NULL	NULL	NULL	NULL	136	mEq/L	3.9	mEq/L	9.1	mg/dL	103	mEq/L	85	mg/dL	6	%	10	mEq/L	NULL	NULL	NULL	NULL	NULL	NULL
12824384	28964275	91	1	WHITE	Other	English	MARRIED	6.3	K/uL	4.21	m/uL	NULL	NULL	NULL	NULL	105	K/uL	13	g/dL	13.4	%	39.4	%	NULL	NULL	NULL	NULL	NULL	NULL	144	mEq/L	4.25	mEq/L	8.75	mg/dL	99.5	mEq/L	150.5	mg/dL	NULL	NULL	20	mEq/L	7.37	units	48	mm Hg	88	mm Hg
12825862	29841199	92	0	WHITE	Medicare	English	SINGLE	11.7	K/uL	4.66	m/uL	NULL	NULL	NULL	NULL	296.5	K/uL	15.2	g/dL	15.6	%	47.6	%	NULL	NULL	NULL	NULL	NULL	NULL	146.5	mEq/L	4.35	mEq/L	9.55	mg/dL	105	mEq/L	146	mg/dL	NULL	NULL	13	mEq/L	NULL	NULL	NULL	NULL	NULL	NULL
12841732	28637455	69	0	WHITE	Medicare	English	SINGLE	9.3	K/uL	4.4	m/uL	NULL	NULL	NULL	NULL	160	K/uL	12.6	g/dL	13.7	%	41.1	%	NULL	NULL	NULL	NULL	NULL	NULL	142	mEq/L	4.4	mEq/L	9.4	mg/dL	105	mEq/L	123	mg/dL	NULL	NULL	13	mEq/L	NULL	NULL	NULL	NULL	NULL	NULL
12841806	22238254	58	0	UNKNOWN	Medicare	English	NULL	6.6	K/uL	4.17	m/uL	NULL	NULL	NULL	NULL	220	K/uL	11.8	g/dL	15	%	38	%	NULL	NULL	NULL	NULL	NULL	NULL	140	mEq/L	4	mEq/L	9	mg/dL	93	mEq/L	153	mg/dL	NULL	NULL	14	mEq/L	7.48	units	43	mm Hg	62.5	mm Hg
12862789	29991453	79	1	WHITE	Medicare	English	MARRIED	4.3	K/uL	3.06	m/uL	NULL	NULL	NULL	NULL	179	K/uL	9	g/dL	15.7	%	29.4	%	NULL	NULL	NULL	NULL	NULL	NULL	134	mEq/L	4.3	mEq/L	6.3	mg/dL	98	mEq/L	88	mg/dL	NULL	NULL	13	mEq/L	NULL	NULL	NULL	NULL	NULL	NULL
12864445	22385273	59	1	WHITE	Medicare	English	MARRIED	30.8	K/uL	2.97	m/uL	27.14	K/uL	0.9	K/uL	321.5	K/uL	7.6	g/dL	21.15	%	26.05	%	2.8	g/dL	NULL	NULL	NULL	NULL	138.67	mEq/L	4.6	mEq/L	8.2	mg/dL	94.67	mEq/L	201.33	mg/dL	NULL	NULL	12.33	mEq/L	7.35	units	60	mm Hg	58.33	mm Hg
12874148	27611458	66	1	UNKNOWN	Medicare	English	NULL	8.7	K/uL	4.14	m/uL	NULL	NULL	NULL	NULL	133	K/uL	11.85	g/dL	14.95	%	38.05	%	4	g/dL	NULL	NULL	NULL	NULL	140	mEq/L	4.15	mEq/L	8.85	mg/dL	103.5	mEq/L	87	mg/dL	NULL	NULL	17.5	mEq/L	7.38	units	41	mm Hg	185	mm Hg
12875339	25636862	67	1	UNKNOWN	Medicare	English	NULL	18	K/uL	2.62	m/uL	NULL	NULL	NULL	NULL	272.5	K/uL	8.3	g/dL	12.95	%	25.65	%	2.9	g/dL	NULL	NULL	NULL	NULL	130.5	mEq/L	4.2	mEq/L	8.6	mg/dL	95.5	mEq/L	275.5	mg/dL	NULL	NULL	11	mEq/L	7.37	units	40.67	mm Hg	119	mm Hg
12880983	29028734	83	0	WHITE	Medicaid	English	WIDOWED	5.18	K/uL	3.03	m/uL	NULL	NULL	NULL	NULL	211.75	K/uL	8.9	g/dL	14.9	%	28.23	%	NULL	NULL	NULL	NULL	NULL	NULL	138.5	mEq/L	4.33	mEq/L	8	mg/dL	107	mEq/L	259	mg/dL	NULL	NULL	16.5	mEq/L	7.29	units	33	mm Hg	125	mm Hg
12883998	21120299	92	0	WHITE	Medicare	English	WIDOWED	9.4	K/uL	3.96	m/uL	NULL	NULL	NULL	NULL	206.5	K/uL	12	g/dL	14	%	38.1	%	2.83	g/dL	NULL	NULL	NULL	NULL	142	mEq/L	4.3	mEq/L	8.9	mg/dL	98	mEq/L	180	mg/dL	NULL	NULL	15	mEq/L	7.38	units	58	mm Hg	43	mm Hg
12886251	28031382	77	1	WHITE	Medicare	English	MARRIED	11.35	K/uL	5.05	m/uL	NULL	NULL	NULL	NULL	117	K/uL	15.8	g/dL	14.85	%	49.45	%	NULL	NULL	NULL	NULL	NULL	NULL	136	mEq/L	3.5	mEq/L	NULL	NULL	93	mEq/L	81	mg/dL	NULL	NULL	12	mEq/L	NULL	NULL	NULL	NULL	NULL	NULL
12887239	28156823	72	0	UNABLE TO OBTAIN	Medicare	English	MARRIED	NULL	NULL	NULL	NULL	NULL	NULL	NULL	NULL	NULL	NULL	NULL	NULL	NULL	NULL	NULL	NULL	NULL	NULL	NULL	NULL	NULL	NULL	NULL	NULL	NULL	NULL	NULL	NULL	NULL	NULL	NULL	NULL	NULL	NULL	NULL	NULL	NULL	NULL	NULL	NULL	NULL	NULL
12889905	21084957	80	1	WHITE	Medicare	English	MARRIED	10.5	K/uL	4.77	m/uL	NULL	NULL	NULL	NULL	178	K/uL	12.7	g/dL	15.9	%	40.7	%	NULL	NULL	NULL	NULL	NULL	NULL	139	mEq/L	3.9	mEq/L	NULL	NULL	103	mEq/L	106	mg/dL	NULL	NULL	12	mEq/L	NULL	NULL	NULL	NULL	NULL	NULL
12894572	21491588	71	0	WHITE	Medicare	English	DIVORCED	8.6	K/uL	3.01	m/uL	NULL	NULL	NULL	NULL	154	K/uL	9.6	g/dL	18.3	%	29.7	%	NULL	NULL	NULL	NULL	NULL	NULL	142	mEq/L	4.4	mEq/L	8.3	mg/dL	102	mEq/L	185	mg/dL	NULL	NULL	18	mEq/L	NULL	NULL	NULL	NULL	NULL	NULL
12894693	26953787	55	0	WHITE	Medicaid	English	SINGLE	11.25	K/uL	4.29	m/uL	NULL	NULL	NULL	NULL	206.5	K/uL	11.65	g/dL	13.6	%	36.35	%	NULL	NULL	NULL	NULL	NULL	NULL	135.5	mEq/L	5.85	mEq/L	9	mg/dL	104	mEq/L	206.5	mg/dL	NULL	NULL	10.5	mEq/L	NULL	NULL	NULL	NULL	NULL	NULL
12903015	20175418	69	0	WHITE	Medicare	English	DIVORCED	9.6	K/uL	3.63	m/uL	NULL	NULL	NULL	NULL	155	K/uL	11.4	g/dL	12	%	34.5	%	4.1	g/dL	NULL	NULL	NULL	NULL	135	mEq/L	4.5	mEq/L	NULL	NULL	101	mEq/L	393	mg/dL	7.2	%	17	mEq/L	NULL	NULL	NULL	NULL	NULL	NULL
12905155	24061738	64	1	WHITE - OTHER EUROPEAN	Medicare	English	SINGLE	10.2	K/uL	2.92	m/uL	8.71	K/uL	0.48	K/uL	145	K/uL	9.1	g/dL	19.2	%	31.5	%	4	g/dL	NULL	NULL	NULL	NULL	140.5	mEq/L	3.9	mEq/L	9.6	mg/dL	98	mEq/L	232	mg/dL	NULL	NULL	12	mEq/L	NULL	NULL	NULL	NULL	NULL	NULL
12929244	21455974	64	1	WHITE	Medicare	English	MARRIED	28.5	K/uL	4.99	m/uL	NULL	NULL	NULL	NULL	209.5	K/uL	12.95	g/dL	17.3	%	41.75	%	4	g/dL	NULL	NULL	NULL	NULL	134.75	mEq/L	4.78	mEq/L	9.38	mg/dL	101	mEq/L	200.25	mg/dL	8.5	%	11.5	mEq/L	7.38	units	44.5	mm Hg	71.25	mm Hg
12929274	20349214	72	1	WHITE	Medicare	English	MARRIED	NULL	NULL	NULL	NULL	NULL	NULL	NULL	NULL	NULL	NULL	NULL	NULL	NULL	NULL	NULL	NULL	NULL	NULL	NULL	NULL	NULL	NULL	NULL	NULL	NULL	NULL	NULL	NULL	NULL	NULL	NULL	NULL	NULL	NULL	NULL	NULL	NULL	NULL	NULL	NULL	NULL	NULL
12932354	20641790	92	0	WHITE	Medicare	English	SINGLE	NULL	NULL	NULL	NULL	NULL	NULL	NULL	NULL	NULL	NULL	NULL	NULL	NULL	NULL	NULL	NULL	NULL	NULL	NULL	NULL	NULL	NULL	NULL	NULL	NULL	NULL	NULL	NULL	NULL	NULL	NULL	NULL	NULL	NULL	NULL	NULL	NULL	NULL	NULL	NULL	NULL	NULL
12940767	26379632	69	1	WHITE	Medicare	English	SINGLE	10.33	K/uL	4.05	m/uL	6.71	K/uL	2.27	K/uL	346	K/uL	11.73	g/dL	13.13	%	36.97	%	4	g/dL	NULL	NULL	7.3	g/dL	137.5	mEq/L	4.65	mEq/L	9.08	mg/dL	100.25	mEq/L	256.75	mg/dL	NULL	NULL	13	mEq/L	NULL	NULL	NULL	NULL	NULL	NULL
12955673	21621519	89	1	WHITE	Medicare	English	DIVORCED	12.95	K/uL	2.17	m/uL	8.38	K/uL	1.18	K/uL	310	K/uL	7.4	g/dL	16.05	%	23.5	%	NULL	NULL	NULL	NULL	NULL	NULL	130.5	mEq/L	4.95	mEq/L	8.95	mg/dL	93.5	mEq/L	115	mg/dL	NULL	NULL	12.5	mEq/L	NULL	NULL	NULL	NULL	NULL	NULL
12958711	24488296	74	1	WHITE	Medicare	English	DIVORCED	16.35	K/uL	3.74	m/uL	NULL	NULL	NULL	NULL	304	K/uL	10.85	g/dL	14.25	%	34.6	%	NULL	NULL	NULL	NULL	NULL	NULL	138.67	mEq/L	3.7	mEq/L	8.5	mg/dL	98.67	mEq/L	215.67	mg/dL	8.6	%	15.33	mEq/L	7.41	units	43	mm Hg	32	mm Hg
12960679	25433460	82	0	WHITE	Medicare	English	MARRIED	3.95	K/uL	2.84	m/uL	1.48	K/uL	1.28	K/uL	120.5	K/uL	8.85	g/dL	13.1	%	28.1	%	2.3	g/dL	NULL	NULL	NULL	NULL	142	mEq/L	3.55	mEq/L	7	mg/dL	111	mEq/L	70.5	mg/dL	NULL	NULL	14.5	mEq/L	NULL	NULL	NULL	NULL	NULL	NULL
12966921	20095914	90	1	WHITE	Medicare	English	WIDOWED	NULL	NULL	NULL	NULL	NULL	NULL	NULL	NULL	NULL	NULL	NULL	NULL	NULL	NULL	NULL	NULL	NULL	NULL	NULL	NULL	NULL	NULL	NULL	NULL	NULL	NULL	NULL	NULL	NULL	NULL	NULL	NULL	NULL	NULL	NULL	NULL	NULL	NULL	NULL	NULL	NULL	NULL
12971370	23595339	61	0	BLACK/CAPE VERDEAN	Medicare	English	MARRIED	11.4	K/uL	3.16	m/uL	8.04	K/uL	1.24	K/uL	91	K/uL	9.7	g/dL	14.9	%	32.2	%	2.9	g/dL	NULL	NULL	NULL	NULL	140	mEq/L	5.3	mEq/L	8.3	mg/dL	104	mEq/L	86	mg/dL	4.5	%	9	mEq/L	7.3	units	54	mm Hg	64	mm Hg
12973451	20841634	76	1	WHITE	Medicare	English	DIVORCED	8.35	K/uL	2.5	m/uL	NULL	NULL	NULL	NULL	195.5	K/uL	7.65	g/dL	14.45	%	23.7	%	NULL	NULL	NULL	NULL	NULL	NULL	136.5	mEq/L	4.65	mEq/L	7.95	mg/dL	103	mEq/L	126	mg/dL	NULL	NULL	9.5	mEq/L	7.33	units	47	mm Hg	136	mm Hg
12974144	24809567	60	1	WHITE	Medicaid	English	SINGLE	NULL	NULL	NULL	NULL	NULL	NULL	NULL	NULL	NULL	NULL	NULL	NULL	NULL	NULL	NULL	NULL	NULL	NULL	NULL	NULL	NULL	NULL	NULL	NULL	NULL	NULL	NULL	NULL	NULL	NULL	NULL	NULL	NULL	NULL	NULL	NULL	NULL	NULL	NULL	NULL	NULL	NULL
12978397	28269123	46	1	WHITE	Private	English	SINGLE	8.5	K/uL	3.45	m/uL	NULL	NULL	NULL	NULL	471	K/uL	9.5	g/dL	13.6	%	30.2	%	NULL	NULL	NULL	NULL	NULL	NULL	141	mEq/L	4.1	mEq/L	9	mg/dL	106	mEq/L	115	mg/dL	6.2	%	10	mEq/L	NULL	NULL	NULL	NULL	NULL	NULL
12978936	21112403	67	0	WHITE	Medicare	English	MARRIED	15.4	K/uL	5.44	m/uL	NULL	NULL	NULL	NULL	141	K/uL	15.9	g/dL	14.5	%	50.9	%	NULL	NULL	NULL	NULL	NULL	NULL	139	mEq/L	3.8	mEq/L	9.7	mg/dL	97	mEq/L	141	mg/dL	NULL	NULL	11	mEq/L	NULL	NULL	NULL	NULL	NULL	NULL
12980023	28893346	65	0	OTHER	Medicare	English	DIVORCED	9.3	K/uL	3.27	m/uL	NULL	NULL	NULL	NULL	239	K/uL	8.8	g/dL	14.4	%	27.5	%	NULL	NULL	NULL	NULL	NULL	NULL	139	mEq/L	5.3	mEq/L	8.5	mg/dL	104	mEq/L	110	mg/dL	NULL	NULL	10	mEq/L	7.42	units	40	mm Hg	194	mm Hg
12988872	22269908	69	0	WHITE	Medicare	English	SINGLE	6.65	K/uL	2.87	m/uL	NULL	NULL	NULL	NULL	279	K/uL	7.75	g/dL	23.9	%	27.1	%	2.8	g/dL	NULL	NULL	NULL	NULL	140.5	mEq/L	3.75	mEq/L	8.5	mg/dL	96	mEq/L	162.5	mg/dL	NULL	NULL	9	mEq/L	NULL	NULL	NULL	NULL	NULL	NULL
12998821	26634382	75	1	WHITE	Medicare	English	MARRIED	1.9	K/uL	2.78	m/uL	1.03	K/uL	0.52	K/uL	107	K/uL	9.4	g/dL	17.3	%	30	%	NULL	NULL	NULL	NULL	6	g/dL	144	mEq/L	4	mEq/L	8.9	mg/dL	92	mEq/L	136.5	mg/dL	NULL	NULL	13.5	mEq/L	7.35	units	77	mm Hg	49	mm Hg
13001561	28851536	64	1	WHITE	Private	English	MARRIED	14.4	K/uL	3.18	m/uL	NULL	NULL	NULL	NULL	113	K/uL	9.2	g/dL	15	%	28.6	%	NULL	NULL	NULL	NULL	NULL	NULL	136	mEq/L	6	mEq/L	7.7	mg/dL	106	mEq/L	238	mg/dL	NULL	NULL	17	mEq/L	7.35	units	41.29	mm Hg	253.29	mm Hg
13009403	28855202	84	1	UNKNOWN	Medicare	English	NULL	9.15	K/uL	3.52	m/uL	6.06	K/uL	1.52	K/uL	336	K/uL	10.15	g/dL	14.25	%	32	%	2.4	g/dL	NULL	NULL	NULL	NULL	140	mEq/L	3.8	mEq/L	8.3	mg/dL	103	mEq/L	147.5	mg/dL	NULL	NULL	14.5	mEq/L	NULL	NULL	NULL	NULL	NULL	NULL
13014612	27348719	81	1	WHITE	Medicare	English	MARRIED	NULL	NULL	NULL	NULL	NULL	NULL	NULL	NULL	NULL	NULL	NULL	NULL	NULL	NULL	NULL	NULL	NULL	NULL	NULL	NULL	NULL	NULL	NULL	NULL	NULL	NULL	NULL	NULL	NULL	NULL	NULL	NULL	NULL	NULL	NULL	NULL	NULL	NULL	NULL	NULL	NULL	NULL
13019261	24648695	76	0	UNKNOWN	Medicare	English	NULL	NULL	NULL	NULL	NULL	NULL	NULL	NULL	NULL	NULL	NULL	NULL	NULL	NULL	NULL	NULL	NULL	NULL	NULL	NULL	NULL	NULL	NULL	NULL	NULL	NULL	NULL	NULL	NULL	NULL	NULL	NULL	NULL	NULL	NULL	NULL	NULL	NULL	NULL	NULL	NULL	NULL	NULL
13039034	23072648	65	0	WHITE	Medicare	English	MARRIED	9.9	K/uL	4.07	m/uL	NULL	NULL	NULL	NULL	225	K/uL	11.7	g/dL	14.1	%	36.3	%	NULL	NULL	NULL	NULL	NULL	NULL	139	mEq/L	4.6	mEq/L	9	mg/dL	103	mEq/L	174	mg/dL	NULL	NULL	15	mEq/L	NULL	NULL	NULL	NULL	NULL	NULL
13058319	29302439	75	1	WHITE	Medicare	English	DIVORCED	5	K/uL	3.68	m/uL	NULL	NULL	NULL	NULL	206	K/uL	10.2	g/dL	15.9	%	32.9	%	3.2	g/dL	NULL	NULL	6.3	g/dL	141.5	mEq/L	3.9	mEq/L	9.05	mg/dL	102.5	mEq/L	104	mg/dL	4.6	%	12.5	mEq/L	NULL	NULL	NULL	NULL	NULL	NULL
13061381	21210052	81	0	WHITE	Medicare	English	NULL	6.9	K/uL	2.59	m/uL	6.23	K/uL	0.7	K/uL	220.67	K/uL	7.6	g/dL	16.17	%	24.5	%	NULL	NULL	NULL	NULL	NULL	NULL	144	mEq/L	5.33	mEq/L	9.07	mg/dL	106.67	mEq/L	104.33	mg/dL	NULL	NULL	23	mEq/L	7.29	units	31	mm Hg	82	mm Hg
13081685	22269681	71	0	WHITE	Medicare	English	MARRIED	2.8	K/uL	3.82	m/uL	1.82	K/uL	0.5	K/uL	128	K/uL	11.3	g/dL	14.6	%	34.2	%	3.8	g/dL	NULL	NULL	NULL	NULL	145	mEq/L	3.8	mEq/L	8.3	mg/dL	109	mEq/L	90	mg/dL	NULL	NULL	12	mEq/L	NULL	NULL	NULL	NULL	NULL	NULL
13083860	26752178	86	1	WHITE	Medicare	English	MARRIED	6.65	K/uL	3.08	m/uL	NULL	NULL	NULL	NULL	86	K/uL	9.1	g/dL	17.4	%	29.95	%	3.5	g/dL	NULL	NULL	NULL	NULL	141.5	mEq/L	4.65	mEq/L	8.95	mg/dL	107	mEq/L	79	mg/dL	NULL	NULL	12	mEq/L	7.34	units	44	mm Hg	194	mm Hg
13084601	24999430	78	1	WHITE	Medicare	English	MARRIED	10.1	K/uL	3.71	m/uL	9.27	K/uL	0.39	K/uL	74	K/uL	10.8	g/dL	13.4	%	32.9	%	NULL	NULL	NULL	NULL	NULL	NULL	135	mEq/L	5	mEq/L	NULL	NULL	106	mEq/L	177	mg/dL	7.4	%	17	mEq/L	7.32	units	32	mm Hg	91	mm Hg
13093726	29824535	64	1	WHITE	Medicaid	English	SINGLE	9	K/uL	4.74	m/uL	7.59	K/uL	1.85	K/uL	173.5	K/uL	13.55	g/dL	13.4	%	42.65	%	4.2	g/dL	NULL	NULL	NULL	NULL	136	mEq/L	4.6	mEq/L	9.6	mg/dL	100	mEq/L	233	mg/dL	9.6	%	15	mEq/L	NULL	NULL	NULL	NULL	NULL	NULL
13100197	28812420	80	0	WHITE	Medicare	English	SINGLE	7.7	K/uL	4.33	m/uL	NULL	NULL	NULL	NULL	211	K/uL	12.3	g/dL	13.9	%	36.8	%	NULL	NULL	NULL	NULL	NULL	NULL	139	mEq/L	3.8	mEq/L	NULL	NULL	101	mEq/L	98	mg/dL	NULL	NULL	12	mEq/L	7.37	units	49	mm Hg	72.5	mm Hg
13107367	21215489	61	1	WHITE	Medicaid	English	SINGLE	NULL	NULL	NULL	NULL	NULL	NULL	NULL	NULL	NULL	NULL	NULL	NULL	NULL	NULL	NULL	NULL	NULL	NULL	NULL	NULL	NULL	NULL	NULL	NULL	NULL	NULL	NULL	NULL	NULL	NULL	NULL	NULL	NULL	NULL	NULL	NULL	NULL	NULL	NULL	NULL	NULL	NULL
13109130	27727924	69	0	UNKNOWN	Medicaid	English	SINGLE	10	K/uL	3.63	m/uL	NULL	NULL	NULL	NULL	244.5	K/uL	10.2	g/dL	13.1	%	31.3	%	NULL	NULL	NULL	NULL	NULL	NULL	137	mEq/L	3.9	mEq/L	9.1	mg/dL	101.5	mEq/L	166	mg/dL	NULL	NULL	15	mEq/L	NULL	NULL	NULL	NULL	NULL	NULL
13109937	29785812	77	0	NATIVE HAWAIIAN OR OTHER PACIFIC ISLANDER	Medicare	English	MARRIED	9.8	K/uL	3.72	m/uL	NULL	NULL	NULL	NULL	217	K/uL	9.9	g/dL	15.1	%	30.85	%	NULL	NULL	NULL	NULL	NULL	NULL	131	mEq/L	3.8	mEq/L	8.5	mg/dL	96	mEq/L	142.5	mg/dL	5.1	%	13	mEq/L	NULL	NULL	NULL	NULL	NULL	NULL
13115761	25270472	73	0	WHITE	Medicare	English	SINGLE	7	K/uL	4.44	m/uL	NULL	NULL	NULL	NULL	218	K/uL	13.6	g/dL	14.5	%	40.8	%	NULL	NULL	NULL	NULL	NULL	NULL	144	mEq/L	3.5	mEq/L	9.4	mg/dL	102	mEq/L	123	mg/dL	NULL	NULL	15	mEq/L	NULL	NULL	NULL	NULL	NULL	NULL
13133575	27777679	82	0	WHITE	Medicare	English	MARRIED	NULL	NULL	NULL	NULL	NULL	NULL	NULL	NULL	NULL	NULL	NULL	NULL	NULL	NULL	NULL	NULL	NULL	NULL	NULL	NULL	NULL	NULL	NULL	NULL	NULL	NULL	NULL	NULL	NULL	NULL	NULL	NULL	NULL	NULL	NULL	NULL	NULL	NULL	NULL	NULL	NULL	NULL
13139980	24717466	66	0	HISPANIC/LATINO - DOMINICAN	Medicaid	Spanish	SINGLE	8.1	K/uL	2.91	m/uL	2.92	K/uL	2.17	K/uL	128	K/uL	8.7	g/dL	12.3	%	28.07	%	NULL	NULL	NULL	NULL	NULL	NULL	140.5	mEq/L	4.03	mEq/L	8.5	mg/dL	105.5	mEq/L	176	mg/dL	5.7	%	12	mEq/L	7.39	units	39.86	mm Hg	275.29	mm Hg
13145906	27988216	62	1	WHITE	Medicaid	English	WIDOWED	5.25	K/uL	2.34	m/uL	NULL	NULL	NULL	NULL	33	K/uL	7.15	g/dL	19.3	%	21.85	%	NULL	NULL	NULL	NULL	NULL	NULL	136	mEq/L	3.8	mEq/L	8.4	mg/dL	100	mEq/L	102	mg/dL	NULL	NULL	25	mEq/L	NULL	NULL	NULL	NULL	NULL	NULL
13151965	26519434	77	1	WHITE	Medicare	English	MARRIED	12.2	K/uL	2.32	m/uL	NULL	NULL	NULL	NULL	373	K/uL	7.7	g/dL	19.9	%	24.8	%	NULL	NULL	NULL	NULL	NULL	NULL	141.5	mEq/L	5.35	mEq/L	7.95	mg/dL	104.5	mEq/L	168	mg/dL	NULL	NULL	18	mEq/L	NULL	NULL	NULL	NULL	NULL	NULL
13163523	23485955	60	1	WHITE	Private	English	WIDOWED	9.9	K/uL	5.04	m/uL	NULL	NULL	NULL	NULL	148	K/uL	16	g/dL	14.4	%	45.7	%	3.9	g/dL	NULL	NULL	NULL	NULL	138	mEq/L	4.1	mEq/L	9.2	mg/dL	98	mEq/L	279	mg/dL	NULL	NULL	20	mEq/L	NULL	NULL	NULL	NULL	NULL	NULL
13167553	20596316	71	0	WHITE	Medicare	English	DIVORCED	11.73	K/uL	3.47	m/uL	NULL	NULL	NULL	NULL	361.33	K/uL	10.67	g/dL	15.8	%	32.97	%	NULL	NULL	NULL	NULL	NULL	NULL	136.5	mEq/L	4.05	mEq/L	8.95	mg/dL	99	mEq/L	198.5	mg/dL	6.2	%	16	mEq/L	NULL	NULL	NULL	NULL	NULL	NULL
13178023	24771093	74	1	WHITE	Medicare	English	SINGLE	12.6	K/uL	3.4	m/uL	NULL	NULL	NULL	NULL	205	K/uL	9.7	g/dL	12.9	%	29.1	%	NULL	NULL	NULL	NULL	NULL	NULL	133	mEq/L	4	mEq/L	8.3	mg/dL	101	mEq/L	250	mg/dL	NULL	NULL	10	mEq/L	NULL	NULL	NULL	NULL	NULL	NULL
13182590	28610071	79	1	UNKNOWN	Medicare	English	NULL	15.34	K/uL	3.84	m/uL	NULL	NULL	NULL	NULL	281.8	K/uL	11.62	g/dL	15.96	%	37.42	%	2.25	g/dL	NULL	NULL	NULL	NULL	134.4	mEq/L	5.74	mEq/L	7.88	mg/dL	103.6	mEq/L	234.4	mg/dL	9.9	%	11	mEq/L	7.22	units	53.14	mm Hg	101.71	mm Hg
13182693	25192845	62	0	WHITE	Private	English	MARRIED	12.8	K/uL	4.52	m/uL	NULL	NULL	NULL	NULL	196	K/uL	14.2	g/dL	13.2	%	42.4	%	NULL	NULL	NULL	NULL	NULL	NULL	141	mEq/L	4.2	mEq/L	9	mg/dL	105	mEq/L	150	mg/dL	NULL	NULL	13	mEq/L	NULL	NULL	NULL	NULL	NULL	NULL
13190878	27947764	92	1	UNKNOWN	Medicare	English	NULL	19.8	K/uL	5.59	m/uL	NULL	NULL	NULL	NULL	206	K/uL	15.8	g/dL	15.1	%	49.9	%	NULL	NULL	NULL	NULL	NULL	NULL	140	mEq/L	5.3	mEq/L	9.6	mg/dL	104	mEq/L	191	mg/dL	NULL	NULL	15	mEq/L	7.4	units	37	mm Hg	66	mm Hg
13195446	28441058	80	1	WHITE	Medicare	English	SINGLE	8.47	K/uL	2.81	m/uL	NULL	NULL	NULL	NULL	124.67	K/uL	7.7	g/dL	16.67	%	25.9	%	NULL	NULL	NULL	NULL	NULL	NULL	139.67	mEq/L	5.5	mEq/L	8	mg/dL	103	mEq/L	125	mg/dL	NULL	NULL	20.67	mEq/L	7.32	units	45.5	mm Hg	40	mm Hg
13196122	28597267	70	1	UNKNOWN	Medicare	English	NULL	9.1	K/uL	5.1	m/uL	7.16	K/uL	0.7	K/uL	192.5	K/uL	14.95	g/dL	14.5	%	46.2	%	NULL	NULL	NULL	NULL	NULL	NULL	139	mEq/L	4.6	mEq/L	8.25	mg/dL	97	mEq/L	282	mg/dL	8.4	%	16	mEq/L	NULL	NULL	NULL	NULL	NULL	NULL
13196672	27351594	92	0	WHITE	Medicare	English	WIDOWED	21.1	K/uL	3.92	m/uL	NULL	NULL	NULL	NULL	123	K/uL	12	g/dL	14.2	%	36.1	%	NULL	NULL	NULL	NULL	NULL	NULL	146	mEq/L	3.3	mEq/L	7.2	mg/dL	107	mEq/L	111	mg/dL	NULL	NULL	12	mEq/L	7.43	units	44	mm Hg	56	mm Hg
13200005	26388737	76	1	BLACK/AFRICAN AMERICAN	Medicare	English	WIDOWED	7.3	K/uL	2.66	m/uL	NULL	NULL	NULL	NULL	169.5	K/uL	7.9	g/dL	14.35	%	23.1	%	NULL	NULL	NULL	NULL	NULL	NULL	145	mEq/L	4.2	mEq/L	8.8	mg/dL	108	mEq/L	197	mg/dL	NULL	NULL	15	mEq/L	NULL	NULL	NULL	NULL	NULL	NULL
13207587	26852299	74	0	WHITE	Private	English	SINGLE	10.75	K/uL	3.69	m/uL	NULL	NULL	NULL	NULL	405.5	K/uL	11.7	g/dL	18.35	%	34.15	%	3.1	g/dL	NULL	NULL	NULL	NULL	130	mEq/L	5.6	mEq/L	9.15	mg/dL	94.5	mEq/L	134	mg/dL	NULL	NULL	15	mEq/L	NULL	NULL	NULL	NULL	NULL	NULL
13209683	20140114	62	1	WHITE	Private	English	DIVORCED	17.8	K/uL	2.44	m/uL	15.33	K/uL	1.34	K/uL	225	K/uL	7.3	g/dL	17.2	%	23.5	%	3.3	g/dL	NULL	NULL	NULL	NULL	143	mEq/L	4.9	mEq/L	9	mg/dL	103	mEq/L	198	mg/dL	NULL	NULL	13	mEq/L	7.39	units	52	mm Hg	58	mm Hg
13212165	29081263	61	1	WHITE	Private	English	MARRIED	8.3	K/uL	4.38	m/uL	NULL	NULL	NULL	NULL	158	K/uL	11.4	g/dL	17.2	%	38.9	%	NULL	NULL	NULL	NULL	NULL	NULL	142.33	mEq/L	4.17	mEq/L	8.4	mg/dL	95.67	mEq/L	314	mg/dL	9.4	%	12	mEq/L	NULL	NULL	NULL	NULL	NULL	NULL
13213314	21364244	86	0	WHITE	Private	English	WIDOWED	8.5	K/uL	4.08	m/uL	NULL	NULL	NULL	NULL	351	K/uL	11.8	g/dL	15.8	%	37.2	%	2.5	g/dL	NULL	NULL	NULL	NULL	148	mEq/L	3.4	mEq/L	12.2	mg/dL	109	mEq/L	80	mg/dL	NULL	NULL	14	mEq/L	7.43	units	NULL	NULL	NULL	NULL
13227244	24239377	79	0	WHITE	Medicare	English	MARRIED	5.9	K/uL	2.33	m/uL	NULL	NULL	NULL	NULL	92	K/uL	7.5	g/dL	17.5	%	23.75	%	NULL	NULL	NULL	NULL	NULL	NULL	134	mEq/L	3.7	mEq/L	8.1	mg/dL	93	mEq/L	115	mg/dL	NULL	NULL	13	mEq/L	NULL	NULL	NULL	NULL	NULL	NULL
13228119	22188108	69	1	WHITE	Medicare	English	MARRIED	4.77	K/uL	2.36	m/uL	2.62	K/uL	1.19	K/uL	257.33	K/uL	7.2	g/dL	14	%	21.73	%	3.7	g/dL	NULL	NULL	NULL	NULL	138.67	mEq/L	3.67	mEq/L	8.73	mg/dL	100.33	mEq/L	129	mg/dL	NULL	NULL	18	mEq/L	7.43	units	31	mm Hg	57.5	mm Hg
13230528	21324775	67	1	WHITE	Medicare	English	SINGLE	11.73	K/uL	6.42	m/uL	8.82	K/uL	1.32	K/uL	178.33	K/uL	16.23	g/dL	17.3	%	53	%	4	g/dL	NULL	NULL	NULL	NULL	149.25	mEq/L	4.03	mEq/L	9.7	mg/dL	109	mEq/L	351.75	mg/dL	NULL	NULL	17	mEq/L	7.4	units	43	mm Hg	84	mm Hg
13233404	26849944	79	1	WHITE	Medicare	English	MARRIED	5.1	K/uL	3.99	m/uL	NULL	NULL	NULL	NULL	134	K/uL	11.5	g/dL	14.9	%	36.8	%	NULL	NULL	NULL	NULL	NULL	NULL	140	mEq/L	5	mEq/L	10.1	mg/dL	98	mEq/L	165	mg/dL	NULL	NULL	9	mEq/L	NULL	NULL	NULL	NULL	NULL	NULL
13237498	27619359	69	1	WHITE	Medicare	English	MARRIED	6.1	K/uL	5.49	m/uL	7.74	K/uL	0.17	K/uL	138	K/uL	15.1	g/dL	17.25	%	50.05	%	2.35	g/dL	NULL	NULL	NULL	NULL	137.33	mEq/L	4.3	mEq/L	7.8	mg/dL	97.33	mEq/L	91	mg/dL	NULL	NULL	14.33	mEq/L	7.22	units	66.4	mm Hg	52.8	mm Hg
13248020	28178082	64	1	WHITE	Other	English	MARRIED	12.4	K/uL	4.5	m/uL	NULL	NULL	NULL	NULL	214	K/uL	12.8	g/dL	15.5	%	39.6	%	NULL	NULL	NULL	NULL	NULL	NULL	142	mEq/L	4.3	mEq/L	8.8	mg/dL	103	mEq/L	115	mg/dL	7.7	%	16	mEq/L	NULL	NULL	NULL	NULL	NULL	NULL
13252596	29555621	66	1	WHITE	Medicare	English	MARRIED	8.2	K/uL	3.69	m/uL	NULL	NULL	NULL	NULL	175	K/uL	11.2	g/dL	13.6	%	34.3	%	3.4	g/dL	NULL	NULL	NULL	NULL	141	mEq/L	4.9	mEq/L	9.1	mg/dL	107	mEq/L	115	mg/dL	NULL	NULL	8	mEq/L	NULL	NULL	NULL	NULL	NULL	NULL
13255518	24597363	67	0	WHITE	Medicare	English	DIVORCED	10.2	K/uL	4.88	m/uL	NULL	NULL	NULL	NULL	265	K/uL	13.2	g/dL	16.3	%	42.7	%	3.9	g/dL	NULL	NULL	NULL	NULL	135	mEq/L	4.35	mEq/L	9.15	mg/dL	91.5	mEq/L	456.5	mg/dL	NULL	NULL	15	mEq/L	NULL	NULL	NULL	NULL	NULL	NULL
13261828	27191862	75	1	UNKNOWN	Medicare	English	MARRIED	14.7	K/uL	3.24	m/uL	NULL	NULL	NULL	NULL	342	K/uL	9.6	g/dL	17.1	%	30.1	%	2.6	g/dL	NULL	NULL	NULL	NULL	144.33	mEq/L	3.83	mEq/L	8.27	mg/dL	104.33	mEq/L	181.67	mg/dL	NULL	NULL	14	mEq/L	7.39	units	48.4	mm Hg	57.8	mm Hg
13268746	21244250	91	1	BLACK/AFRICAN AMERICAN	Medicare	English	MARRIED	14.45	K/uL	3.69	m/uL	NULL	NULL	NULL	NULL	208.5	K/uL	10.95	g/dL	12.15	%	31.6	%	NULL	NULL	NULL	NULL	NULL	NULL	137.5	mEq/L	4.33	mEq/L	9.32	mg/dL	104.75	mEq/L	352	mg/dL	NULL	NULL	12.75	mEq/L	7.33	units	38.75	mm Hg	144	mm Hg
13269322	26216505	81	1	ASIAN	Medicaid	Vietnamese	MARRIED	2.6	K/uL	3.82	m/uL	1.06	K/uL	0.21	K/uL	253	K/uL	10.6	g/dL	15.2	%	32.5	%	3	g/dL	NULL	NULL	NULL	NULL	133	mEq/L	3.8	mEq/L	8.2	mg/dL	99	mEq/L	98	mg/dL	NULL	NULL	10	mEq/L	NULL	NULL	NULL	NULL	NULL	NULL
13272020	28466134	75	1	UNABLE TO OBTAIN	Medicare	English	WIDOWED	17.57	K/uL	2.42	m/uL	17.74	K/uL	0.32	K/uL	228.67	K/uL	6.97	g/dL	17.97	%	21.5	%	2.7	g/dL	NULL	NULL	NULL	NULL	146	mEq/L	4	mEq/L	8.3	mg/dL	110.5	mEq/L	153	mg/dL	5.5	%	5	mEq/L	7.44	units	44.25	mm Hg	95.75	mm Hg
13287588	22657625	92	1	WHITE	Medicaid	English	WIDOWED	8.2	K/uL	3.87	m/uL	NULL	NULL	NULL	NULL	174	K/uL	11.9	g/dL	12.9	%	38.4	%	3.6	g/dL	NULL	NULL	NULL	NULL	145	mEq/L	4.7	mEq/L	8.7	mg/dL	106	mEq/L	61	mg/dL	NULL	NULL	12	mEq/L	NULL	NULL	NULL	NULL	NULL	NULL
13290742	27019115	46	0	WHITE	NULL	English	SINGLE	NULL	NULL	NULL	NULL	NULL	NULL	NULL	NULL	NULL	NULL	NULL	NULL	NULL	NULL	NULL	NULL	NULL	NULL	NULL	NULL	NULL	NULL	NULL	NULL	NULL	NULL	NULL	NULL	NULL	NULL	NULL	NULL	NULL	NULL	NULL	NULL	NULL	NULL	NULL	NULL	NULL	NULL
13297494	28318864	64	0	WHITE	Medicare	English	MARRIED	9.5	K/uL	4.55	m/uL	NULL	NULL	NULL	NULL	249	K/uL	12.5	g/dL	15.5	%	39.8	%	NULL	NULL	NULL	NULL	NULL	NULL	136	mEq/L	4.1	mEq/L	9.7	mg/dL	96.5	mEq/L	231	mg/dL	NULL	NULL	17.5	mEq/L	NULL	NULL	NULL	NULL	NULL	NULL
13302852	20691913	67	0	BLACK/AFRICAN AMERICAN	Medicaid	English	WIDOWED	NULL	NULL	NULL	NULL	NULL	NULL	NULL	NULL	NULL	NULL	NULL	NULL	NULL	NULL	NULL	NULL	NULL	NULL	NULL	NULL	NULL	NULL	NULL	NULL	NULL	NULL	NULL	NULL	NULL	NULL	NULL	NULL	NULL	NULL	NULL	NULL	NULL	NULL	NULL	NULL	NULL	NULL
13304652	27356906	59	0	PORTUGUESE	Medicare	English	SINGLE	5.9	K/uL	2.29	m/uL	NULL	NULL	NULL	NULL	93	K/uL	7.2	g/dL	16.1	%	22.4	%	NULL	NULL	NULL	NULL	NULL	NULL	130.5	mEq/L	4.75	mEq/L	9.35	mg/dL	101.5	mEq/L	117.5	mg/dL	NULL	NULL	18.5	mEq/L	7.33	units	31	mm Hg	169	mm Hg
13306021	21607137	69	1	WHITE	Medicare	English	SINGLE	16.4	K/uL	4.54	m/uL	NULL	NULL	NULL	NULL	230	K/uL	12.4	g/dL	13.4	%	38.3	%	NULL	NULL	NULL	NULL	NULL	NULL	138	mEq/L	4.1	mEq/L	9	mg/dL	102	mEq/L	188	mg/dL	NULL	NULL	13	mEq/L	NULL	NULL	NULL	NULL	NULL	NULL
13306142	28675575	63	0	UNABLE TO OBTAIN	Medicare	English	NULL	10.7	K/uL	2.75	m/uL	NULL	NULL	NULL	NULL	211	K/uL	7.7	g/dL	20.4	%	25	%	NULL	NULL	NULL	NULL	NULL	NULL	135	mEq/L	4.3	mEq/L	8.7	mg/dL	94	mEq/L	131	mg/dL	NULL	NULL	21	mEq/L	NULL	NULL	NULL	NULL	NULL	NULL
13325202	21384260	78	0	WHITE	Medicare	English	WIDOWED	6.4	K/uL	3.39	m/uL	NULL	NULL	NULL	NULL	221	K/uL	11	g/dL	14.3	%	35.4	%	3.6	g/dL	2.4	g/dL	6	g/dL	143	mEq/L	3	mEq/L	8.9	mg/dL	100	mEq/L	116	mg/dL	NULL	NULL	16	mEq/L	NULL	NULL	NULL	NULL	NULL	NULL
13334193	22379998	58	0	BLACK/AFRICAN AMERICAN	Medicaid	English	SINGLE	NULL	NULL	NULL	NULL	NULL	NULL	NULL	NULL	NULL	NULL	NULL	NULL	NULL	NULL	NULL	NULL	NULL	NULL	NULL	NULL	NULL	NULL	NULL	NULL	NULL	NULL	NULL	NULL	NULL	NULL	NULL	NULL	NULL	NULL	NULL	NULL	NULL	NULL	NULL	NULL	NULL	NULL
13335699	21353208	71	1	WHITE	Medicare	English	SINGLE	7.5	K/uL	3.17	m/uL	4.96	K/uL	1.34	K/uL	215	K/uL	9.8	g/dL	15.9	%	32.3	%	3.65	g/dL	3.5	g/dL	7.1	g/dL	140	mEq/L	5	mEq/L	8.5	mg/dL	98	mEq/L	131	mg/dL	NULL	NULL	17	mEq/L	NULL	NULL	NULL	NULL	NULL	NULL
13345447	25854039	65	0	WHITE	Medicare	English	SINGLE	4	K/uL	4.03	m/uL	3.16	K/uL	0.52	K/uL	78	K/uL	12.1	g/dL	13.5	%	37.8	%	4.7	g/dL	NULL	NULL	NULL	NULL	134	mEq/L	3.4	mEq/L	8.5	mg/dL	93	mEq/L	242	mg/dL	NULL	NULL	16	mEq/L	NULL	NULL	NULL	NULL	NULL	NULL
13346037	25737489	73	1	WHITE	Medicare	English	SINGLE	12.5	K/uL	4.37	m/uL	NULL	NULL	NULL	NULL	244	K/uL	13.7	g/dL	13.5	%	40.7	%	NULL	NULL	NULL	NULL	NULL	NULL	137	mEq/L	4.2	mEq/L	8.6	mg/dL	99	mEq/L	89	mg/dL	NULL	NULL	16	mEq/L	NULL	NULL	NULL	NULL	NULL	NULL
13347120	22536049	69	0	HISPANIC/LATINO - DOMINICAN	Medicare	Spanish	MARRIED	8.7	K/uL	3.25	m/uL	NULL	NULL	NULL	NULL	278	K/uL	9.6	g/dL	23.2	%	27.5	%	2.4	g/dL	NULL	NULL	NULL	NULL	135	mEq/L	3.6	mEq/L	8.5	mg/dL	102	mEq/L	249	mg/dL	NULL	NULL	9	mEq/L	NULL	NULL	NULL	NULL	NULL	NULL
13352372	28752421	67	1	WHITE	Medicare	English	MARRIED	16.95	K/uL	2.89	m/uL	13.92	K/uL	1.32	K/uL	320	K/uL	8.45	g/dL	14.95	%	26.25	%	2.7	g/dL	NULL	NULL	NULL	NULL	137.5	mEq/L	4.3	mEq/L	8.28	mg/dL	98	mEq/L	215.75	mg/dL	NULL	NULL	18.25	mEq/L	7.36	units	50.57	mm Hg	77	mm Hg
13356023	25156351	88	0	WHITE	Medicare	Italian	WIDOWED	12.3	K/uL	2.59	m/uL	10.12	K/uL	1.7	K/uL	189	K/uL	8.4	g/dL	13.93	%	25.2	%	NULL	NULL	NULL	NULL	NULL	NULL	143.33	mEq/L	3.95	mEq/L	8.3	mg/dL	104.33	mEq/L	203	mg/dL	7.3	%	12.33	mEq/L	7.39	units	39	mm Hg	79	mm Hg
13360726	28298898	59	0	UNKNOWN	Medicaid	English	NULL	6.95	K/uL	2.3	m/uL	4.54	K/uL	1.63	K/uL	205.5	K/uL	7.55	g/dL	14.25	%	23.6	%	2.5	g/dL	NULL	NULL	NULL	NULL	143.5	mEq/L	3.5	mEq/L	8.5	mg/dL	101	mEq/L	156	mg/dL	NULL	NULL	11.5	mEq/L	7.39	units	54.25	mm Hg	94.5	mm Hg
13363028	28252222	79	0	WHITE	Private	English	MARRIED	7	K/uL	3.21	m/uL	NULL	NULL	NULL	NULL	163	K/uL	9.9	g/dL	14.6	%	31	%	NULL	NULL	NULL	NULL	NULL	NULL	126	mEq/L	6	mEq/L	9.5	mg/dL	92	mEq/L	158	mg/dL	NULL	NULL	14	mEq/L	NULL	NULL	NULL	NULL	NULL	NULL
13366069	23326824	81	0	BLACK/AFRICAN AMERICAN	Medicare	English	WIDOWED	11.17	K/uL	2.8	m/uL	NULL	NULL	NULL	NULL	298	K/uL	8.43	g/dL	14.6	%	26.63	%	3.1	g/dL	NULL	NULL	NULL	NULL	136.33	mEq/L	3.6	mEq/L	9.2	mg/dL	95.67	mEq/L	154.33	mg/dL	NULL	NULL	11.67	mEq/L	NULL	NULL	NULL	NULL	NULL	NULL
13369819	24398167	68	1	WHITE	Private	English	MARRIED	10.95	K/uL	3.92	m/uL	NULL	NULL	NULL	NULL	216.5	K/uL	11.65	g/dL	12.9	%	36	%	NULL	NULL	NULL	NULL	NULL	NULL	140	mEq/L	4.05	mEq/L	8.35	mg/dL	104.5	mEq/L	157.5	mg/dL	NULL	NULL	14.5	mEq/L	NULL	NULL	NULL	NULL	NULL	NULL
13371327	22592602	93	1	WHITE	Medicare	English	MARRIED	7.8	K/uL	3.44	m/uL	NULL	NULL	NULL	NULL	350	K/uL	9.4	g/dL	13.9	%	30.1	%	3.4	g/dL	NULL	NULL	NULL	NULL	130	mEq/L	4.8	mEq/L	9.4	mg/dL	91.5	mEq/L	148.5	mg/dL	NULL	NULL	14.5	mEq/L	7.42	units	48	mm Hg	65	mm Hg
13372290	26900465	79	0	WHITE	Medicare	English	NULL	6.34	K/uL	4.13	m/uL	4.16	K/uL	1.43	K/uL	113.4	K/uL	12.5	g/dL	16.18	%	41.48	%	2.05	g/dL	NULL	NULL	NULL	NULL	145	mEq/L	4.87	mEq/L	7.29	mg/dL	113	mEq/L	119.57	mg/dL	NULL	NULL	15.14	mEq/L	7.23	units	46.67	mm Hg	124.56	mm Hg
13372610	27417209	66	1	WHITE	Medicare	English	WIDOWED	8.2	K/uL	4.73	m/uL	NULL	NULL	NULL	NULL	261	K/uL	14.4	g/dL	13.2	%	41.2	%	4.5	g/dL	NULL	NULL	NULL	NULL	143	mEq/L	4.1	mEq/L	NULL	NULL	105	mEq/L	145	mg/dL	6.8	%	15	mEq/L	NULL	NULL	NULL	NULL	NULL	NULL
13380468	21574991	76	1	PORTUGUESE	Medicare	Portuguese	MARRIED	16.5	K/uL	3.43	m/uL	NULL	NULL	NULL	NULL	197	K/uL	10.2	g/dL	16.2	%	31.8	%	NULL	NULL	NULL	NULL	NULL	NULL	137	mEq/L	4.2	mEq/L	NULL	NULL	101	mEq/L	209	mg/dL	NULL	NULL	12	mEq/L	7.4	units	46	mm Hg	305	mm Hg
13388445	22264414	67	1	WHITE	Medicare	English	SINGLE	6.7	K/uL	4.81	m/uL	NULL	NULL	NULL	NULL	237	K/uL	14.1	g/dL	14.8	%	43.9	%	3.9	g/dL	NULL	NULL	NULL	NULL	141	mEq/L	4.7	mEq/L	9.3	mg/dL	102	mEq/L	162	mg/dL	6.6	%	13	mEq/L	NULL	NULL	NULL	NULL	NULL	NULL
13390728	26350081	58	0	WHITE	Private	English	MARRIED	13.55	K/uL	3.85	m/uL	11.15	K/uL	2.04	K/uL	168	K/uL	12.5	g/dL	14.4	%	38.55	%	NULL	NULL	NULL	NULL	NULL	NULL	139	mEq/L	3.5	mEq/L	8.45	mg/dL	93	mEq/L	147.67	mg/dL	NULL	NULL	14.33	mEq/L	7.42	units	62	mm Hg	39	mm Hg
13403695	28990586	58	0	WHITE	Private	English	MARRIED	10.7	K/uL	4.86	m/uL	NULL	NULL	NULL	NULL	245	K/uL	13.8	g/dL	12.9	%	43.7	%	3.7	g/dL	NULL	NULL	NULL	NULL	140	mEq/L	3.9	mEq/L	8.9	mg/dL	105	mEq/L	175	mg/dL	NULL	NULL	13	mEq/L	NULL	NULL	NULL	NULL	NULL	NULL
13406846	20569098	68	1	WHITE	Medicare	English	NULL	11.4	K/uL	4.03	m/uL	NULL	NULL	NULL	NULL	186	K/uL	12.2	g/dL	13.2	%	37.5	%	NULL	NULL	NULL	NULL	NULL	NULL	141.5	mEq/L	3.8	mEq/L	7.6	mg/dL	110	mEq/L	177	mg/dL	9.4	%	11	mEq/L	7.39	units	34	mm Hg	171	mm Hg
13419426	24600237	81	1	WHITE	Medicare	Portuguese	MARRIED	22.35	K/uL	4.27	m/uL	21.33	K/uL	0.66	K/uL	136	K/uL	12.05	g/dL	14.65	%	37.05	%	3.6	g/dL	NULL	NULL	NULL	NULL	140	mEq/L	3.8	mEq/L	8.7	mg/dL	102	mEq/L	113	mg/dL	NULL	NULL	13	mEq/L	7.39	units	NULL	NULL	NULL	NULL
13434692	28448120	67	0	WHITE - OTHER EUROPEAN	Medicare	English	WIDOWED	19.17	K/uL	3.51	m/uL	18.56	K/uL	0.85	K/uL	241.33	K/uL	10.53	g/dL	13.77	%	35.6	%	NULL	NULL	NULL	NULL	NULL	NULL	136.33	mEq/L	6.3	mEq/L	8.4	mg/dL	108	mEq/L	155.33	mg/dL	NULL	NULL	13.67	mEq/L	NULL	NULL	NULL	NULL	NULL	NULL
13434757	23493268	59	1	WHITE	Medicaid	English	SINGLE	22.7	K/uL	3.93	m/uL	NULL	NULL	NULL	NULL	312	K/uL	9.6	g/dL	16.8	%	31.4	%	NULL	NULL	NULL	NULL	NULL	NULL	137.5	mEq/L	4.8	mEq/L	8.6	mg/dL	104	mEq/L	282.5	mg/dL	NULL	NULL	8.5	mEq/L	7.32	units	50.5	mm Hg	52	mm Hg
13442831	20681639	84	1	WHITE	Medicare	English	MARRIED	5.5	K/uL	2.9	m/uL	NULL	NULL	NULL	NULL	152	K/uL	8.2	g/dL	15.3	%	25.4	%	3.4	g/dL	NULL	NULL	NULL	NULL	144	mEq/L	4.4	mEq/L	6.1	mg/dL	109	mEq/L	68	mg/dL	NULL	NULL	18	mEq/L	NULL	NULL	NULL	NULL	NULL	NULL
13443859	21272545	75	1	WHITE	Medicare	English	MARRIED	6.7	K/uL	3.38	m/uL	NULL	NULL	NULL	NULL	157	K/uL	11.2	g/dL	13.6	%	33.7	%	NULL	NULL	NULL	NULL	NULL	NULL	141	mEq/L	4.3	mEq/L	9	mg/dL	107	mEq/L	74	mg/dL	6.3	%	14	mEq/L	NULL	NULL	NULL	NULL	NULL	NULL
13448806	25068224	81	0	WHITE	Medicare	English	WIDOWED	7.45	K/uL	2.38	m/uL	5.41	K/uL	1.1	K/uL	253.5	K/uL	8.85	g/dL	22.1	%	26.1	%	NULL	NULL	NULL	NULL	NULL	NULL	138	mEq/L	4	mEq/L	7.9	mg/dL	101.5	mEq/L	127	mg/dL	NULL	NULL	14.5	mEq/L	NULL	NULL	NULL	NULL	NULL	NULL
13451992	29453516	72	1	BLACK/AFRICAN	Medicare	English	WIDOWED	2.45	K/uL	3.93	m/uL	1.58	K/uL	0.73	K/uL	154.5	K/uL	11.9	g/dL	16.25	%	36.5	%	3.4	g/dL	NULL	NULL	NULL	NULL	139.33	mEq/L	5.07	mEq/L	8.43	mg/dL	103	mEq/L	190.33	mg/dL	10	%	11.67	mEq/L	7.31	units	61.5	mm Hg	38.5	mm Hg
13467066	27794492	78	1	UNKNOWN	Medicare	English	NULL	13	K/uL	3.51	m/uL	NULL	NULL	NULL	NULL	163	K/uL	12.2	g/dL	12.8	%	34.3	%	NULL	NULL	NULL	NULL	NULL	NULL	142	mEq/L	4.2	mEq/L	8.9	mg/dL	103	mEq/L	113	mg/dL	NULL	NULL	17	mEq/L	NULL	NULL	NULL	NULL	NULL	NULL
13474594	22184064	64	1	WHITE	Medicare	English	SINGLE	6.1	K/uL	3.52	m/uL	NULL	NULL	NULL	NULL	173	K/uL	10.9	g/dL	12.8	%	31	%	NULL	NULL	NULL	NULL	NULL	NULL	139	mEq/L	4.5	mEq/L	8.8	mg/dL	104	mEq/L	131	mg/dL	6.7	%	17	mEq/L	7.3	units	51	mm Hg	44	mm Hg
13481071	27244071	80	0	WHITE	Medicare	English	MARRIED	5.3	K/uL	3.82	m/uL	NULL	NULL	NULL	NULL	148	K/uL	12.1	g/dL	13.2	%	35.8	%	NULL	NULL	NULL	NULL	NULL	NULL	141	mEq/L	3.7	mEq/L	9.4	mg/dL	103	mEq/L	88	mg/dL	NULL	NULL	14	mEq/L	NULL	NULL	NULL	NULL	NULL	NULL
13481284	29575304	66	0	BLACK/AFRICAN	Medicare	English	WIDOWED	12.3	K/uL	3.37	m/uL	NULL	NULL	NULL	NULL	139	K/uL	12.1	g/dL	13.5	%	37.5	%	NULL	NULL	NULL	NULL	NULL	NULL	140	mEq/L	4.3	mEq/L	NULL	NULL	99	mEq/L	93	mg/dL	NULL	NULL	20	mEq/L	NULL	NULL	NULL	NULL	NULL	NULL
13484406	23103295	63	0	HISPANIC/LATINO - CENTRAL AMERICAN	Medicare	Spanish	SINGLE	19.65	K/uL	1.96	m/uL	NULL	NULL	NULL	NULL	37.5	K/uL	6.9	g/dL	18.03	%	21.38	%	NULL	NULL	NULL	NULL	NULL	NULL	132	mEq/L	4.63	mEq/L	8.13	mg/dL	99.33	mEq/L	79.33	mg/dL	NULL	NULL	21	mEq/L	7.29	units	31.67	mm Hg	49.33	mm Hg
13500248	27373586	77	0	WHITE	Medicare	English	DIVORCED	21	K/uL	6.73	m/uL	NULL	NULL	NULL	NULL	209	K/uL	15.6	g/dL	27.9	%	53.5	%	3.6	g/dL	NULL	NULL	NULL	NULL	138	mEq/L	3.4	mEq/L	9	mg/dL	95	mEq/L	248	mg/dL	NULL	NULL	20	mEq/L	NULL	NULL	NULL	NULL	NULL	NULL
13502608	20861250	53	1	WHITE	Medicaid	English	SINGLE	7.5	K/uL	4.08	m/uL	3.3	K/uL	3.37	K/uL	217	K/uL	12.1	g/dL	13.8	%	37.1	%	NULL	NULL	NULL	NULL	NULL	NULL	137	mEq/L	4.4	mEq/L	8.3	mg/dL	105	mEq/L	109	mg/dL	12	%	15	mEq/L	NULL	NULL	NULL	NULL	NULL	NULL
13505697	28075541	87	0	WHITE	Medicare	English	WIDOWED	8.15	K/uL	3.88	m/uL	NULL	NULL	NULL	NULL	154.5	K/uL	11.1	g/dL	15.6	%	35.1	%	NULL	NULL	NULL	NULL	NULL	NULL	138	mEq/L	3.6	mEq/L	8.45	mg/dL	101.5	mEq/L	213.5	mg/dL	NULL	NULL	9.5	mEq/L	NULL	NULL	NULL	NULL	NULL	NULL
13508667	23693878	92	1	WHITE	Medicare	English	WIDOWED	NULL	NULL	NULL	NULL	NULL	NULL	NULL	NULL	NULL	NULL	NULL	NULL	NULL	NULL	NULL	NULL	NULL	NULL	NULL	NULL	NULL	NULL	125	mEq/L	NULL	NULL	NULL	NULL	NULL	NULL	NULL	NULL	NULL	NULL	NULL	NULL	NULL	NULL	NULL	NULL	NULL	NULL
13512671	25071022	74	1	WHITE	Medicare	English	DIVORCED	11.4	K/uL	4.1	m/uL	NULL	NULL	NULL	NULL	142	K/uL	13.2	g/dL	13.2	%	40.5	%	NULL	NULL	NULL	NULL	NULL	NULL	139	mEq/L	3.7	mEq/L	7.9	mg/dL	107	mEq/L	177	mg/dL	NULL	NULL	9	mEq/L	7.35	units	44.6	mm Hg	112.6	mm Hg
13525723	23204157	82	1	BLACK/CAPE VERDEAN	Medicare	English	DIVORCED	NULL	NULL	NULL	NULL	NULL	NULL	NULL	NULL	NULL	NULL	NULL	NULL	NULL	NULL	NULL	NULL	NULL	NULL	NULL	NULL	NULL	NULL	NULL	NULL	NULL	NULL	NULL	NULL	NULL	NULL	NULL	NULL	NULL	NULL	NULL	NULL	NULL	NULL	NULL	NULL	NULL	NULL
13543913	29465338	47	1	OTHER	Medicaid	Spanish	SINGLE	12.9	K/uL	4.04	m/uL	NULL	NULL	NULL	NULL	141	K/uL	12.1	g/dL	13.7	%	35.5	%	NULL	NULL	NULL	NULL	NULL	NULL	143	mEq/L	3.8	mEq/L	8.4	mg/dL	109	mEq/L	103	mg/dL	NULL	NULL	14	mEq/L	7.34	units	43	mm Hg	133	mm Hg
13545585	21865628	76	1	BLACK/AFRICAN AMERICAN	Medicare	English	WIDOWED	8.4	K/uL	4.47	m/uL	NULL	NULL	NULL	NULL	271	K/uL	11.9	g/dL	13.3	%	38.8	%	NULL	NULL	NULL	NULL	NULL	NULL	135.67	mEq/L	5.1	mEq/L	8.85	mg/dL	92	mEq/L	435	mg/dL	NULL	NULL	15.33	mEq/L	NULL	NULL	NULL	NULL	NULL	NULL
13548789	25377972	92	0	BLACK/AFRICAN AMERICAN	Medicare	English	SINGLE	6.3	K/uL	4.04	m/uL	NULL	NULL	NULL	NULL	227	K/uL	12.2	g/dL	15	%	37.5	%	NULL	NULL	NULL	NULL	NULL	NULL	142	mEq/L	4.45	mEq/L	9	mg/dL	97.5	mEq/L	80.5	mg/dL	NULL	NULL	15.5	mEq/L	NULL	NULL	NULL	NULL	NULL	NULL
13552562	20384878	84	1	WHITE	Private	English	MARRIED	20.53	K/uL	2.51	m/uL	20.37	K/uL	1.75	K/uL	136	K/uL	7.76	g/dL	13.25	%	23.3	%	NULL	NULL	NULL	NULL	NULL	NULL	139	mEq/L	4.15	mEq/L	7.8	mg/dL	107.5	mEq/L	91	mg/dL	NULL	NULL	9	mEq/L	7.4	units	39.25	mm Hg	293.13	mm Hg
13556235	23324622	88	1	WHITE	Medicare	English	WIDOWED	12.6	K/uL	3.53	m/uL	NULL	NULL	NULL	NULL	222	K/uL	10.5	g/dL	13.7	%	34.5	%	NULL	NULL	NULL	NULL	NULL	NULL	139	mEq/L	4.7	mEq/L	8.7	mg/dL	103	mEq/L	165	mg/dL	NULL	NULL	15	mEq/L	NULL	NULL	NULL	NULL	NULL	NULL
13556549	25569118	68	1	WHITE	Medicare	English	DIVORCED	5.5	K/uL	4.45	m/uL	2.48	K/uL	1.78	K/uL	206	K/uL	13.6	g/dL	13	%	39.9	%	NULL	NULL	NULL	NULL	NULL	NULL	145	mEq/L	4.4	mEq/L	8.9	mg/dL	105	mEq/L	114	mg/dL	NULL	NULL	16	mEq/L	NULL	NULL	NULL	NULL	NULL	NULL
13561377	24884678	73	0	UNKNOWN	Medicare	English	MARRIED	7.4	K/uL	3.42	m/uL	NULL	NULL	NULL	NULL	178	K/uL	10.7	g/dL	13.4	%	34.5	%	NULL	NULL	NULL	NULL	NULL	NULL	142	mEq/L	4.3	mEq/L	8.4	mg/dL	106	mEq/L	97	mg/dL	6.5	%	20	mEq/L	NULL	NULL	NULL	NULL	NULL	NULL
13567208	21751060	65	1	WHITE	Private	English	DIVORCED	5.4	K/uL	2.45	m/uL	NULL	NULL	NULL	NULL	120	K/uL	7	g/dL	15.3	%	23.2	%	NULL	NULL	NULL	NULL	NULL	NULL	138	mEq/L	4.8	mEq/L	8.1	mg/dL	108	mEq/L	100	mg/dL	NULL	NULL	14	mEq/L	NULL	NULL	NULL	NULL	NULL	NULL
13583790	23318541	69	0	WHITE	Medicare	English	MARRIED	16.45	K/uL	5.46	m/uL	17.62	K/uL	0.49	K/uL	514	K/uL	15.5	g/dL	14.6	%	50.75	%	4.6	g/dL	NULL	NULL	NULL	NULL	136.67	mEq/L	4.3	mEq/L	9.57	mg/dL	93	mEq/L	235.67	mg/dL	NULL	NULL	11	mEq/L	7.29	units	82.5	mm Hg	50	mm Hg
13588436	27838743	89	1	UNKNOWN	Medicare	English	MARRIED	8.7	K/uL	3.58	m/uL	NULL	NULL	NULL	NULL	268	K/uL	10.4	g/dL	14.3	%	31.8	%	NULL	NULL	NULL	NULL	NULL	NULL	129.75	mEq/L	4.3	mEq/L	9.3	mg/dL	89	mEq/L	157	mg/dL	6.6	%	12	mEq/L	NULL	NULL	NULL	NULL	NULL	NULL
13590853	21828429	66	0	WHITE	Medicare	English	SINGLE	15	K/uL	3.15	m/uL	NULL	NULL	NULL	NULL	365	K/uL	10.3	g/dL	13.1	%	30.4	%	3.4	g/dL	NULL	NULL	NULL	NULL	136	mEq/L	3.5	mEq/L	8.8	mg/dL	97	mEq/L	136	mg/dL	6.5	%	11	mEq/L	NULL	NULL	NULL	NULL	NULL	NULL
13603311	26713097	75	0	WHITE	Medicare	English	WIDOWED	17.75	K/uL	5.48	m/uL	NULL	NULL	NULL	NULL	146.5	K/uL	14.3	g/dL	19.3	%	46.75	%	NULL	NULL	NULL	NULL	NULL	NULL	132	mEq/L	4.25	mEq/L	8.7	mg/dL	86	mEq/L	163.5	mg/dL	NULL	NULL	23	mEq/L	NULL	NULL	NULL	NULL	NULL	NULL
13608981	27538351	73	1	WHITE	Private	English	SINGLE	9.8	K/uL	4.34	m/uL	NULL	NULL	NULL	NULL	80	K/uL	12.6	g/dL	14.3	%	38.78	%	NULL	NULL	NULL	NULL	NULL	NULL	145.5	mEq/L	4.5	mEq/L	8.95	mg/dL	110.5	mEq/L	117.5	mg/dL	NULL	NULL	11	mEq/L	NULL	NULL	NULL	NULL	NULL	NULL
13610225	29859439	70	1	ASIAN	Medicare	English	MARRIED	18.55	K/uL	4.75	m/uL	NULL	NULL	NULL	NULL	218.5	K/uL	13.95	g/dL	12.5	%	43.8	%	NULL	NULL	NULL	NULL	NULL	NULL	138	mEq/L	4.8	mEq/L	8.4	mg/dL	104	mEq/L	174	mg/dL	NULL	NULL	9	mEq/L	7.28	units	49.33	mm Hg	133.33	mm Hg
13612514	29308190	63	1	WHITE	Medicare	English	MARRIED	9.6	K/uL	2.75	m/uL	7.09	K/uL	0.83	K/uL	177	K/uL	8.4	g/dL	14.6	%	24.1	%	4.1	g/dL	NULL	NULL	NULL	NULL	123	mEq/L	4.1	mEq/L	9.2	mg/dL	90	mEq/L	124	mg/dL	NULL	NULL	10	mEq/L	NULL	NULL	NULL	NULL	NULL	NULL
13612783	27653856	75	1	WHITE	Medicare	English	MARRIED	15.1	K/uL	4.84	m/uL	12.5	K/uL	1.22	K/uL	257	K/uL	13.6	g/dL	13.6	%	41.6	%	NULL	NULL	NULL	NULL	NULL	NULL	132	mEq/L	4.8	mEq/L	NULL	NULL	101	mEq/L	128	mg/dL	NULL	NULL	15	mEq/L	NULL	NULL	NULL	NULL	NULL	NULL
13628108	28632924	75	1	WHITE	Medicare	English	NULL	11.6	K/uL	4.89	m/uL	NULL	NULL	NULL	NULL	316	K/uL	15.45	g/dL	12.95	%	45.3	%	4.3	g/dL	NULL	NULL	NULL	NULL	134	mEq/L	4.67	mEq/L	NULL	NULL	100.5	mEq/L	117	mg/dL	6.7	%	11.5	mEq/L	NULL	NULL	NULL	NULL	NULL	NULL
13630099	28986925	78	1	WHITE	Medicare	English	MARRIED	5.05	K/uL	3.39	m/uL	3.61	K/uL	1.36	K/uL	280	K/uL	9.2	g/dL	15.15	%	30.75	%	3.2	g/dL	NULL	NULL	NULL	NULL	137	mEq/L	5.6	mEq/L	8.35	mg/dL	105	mEq/L	95.5	mg/dL	NULL	NULL	11.5	mEq/L	7.4	units	35	mm Hg	145.5	mm Hg
13651712	26103463	66	1	WHITE	Private	English	SINGLE	8.8	K/uL	4.11	m/uL	NULL	NULL	NULL	NULL	189	K/uL	12.7	g/dL	13.5	%	39.1	%	3.8	g/dL	NULL	NULL	NULL	NULL	140	mEq/L	5.1	mEq/L	NULL	NULL	103	mEq/L	359	mg/dL	7.9	%	15	mEq/L	NULL	NULL	NULL	NULL	NULL	NULL
13660560	25211516	62	1	UNKNOWN	Private	English	MARRIED	24.8	K/uL	3.59	m/uL	NULL	NULL	NULL	NULL	209	K/uL	9.78	g/dL	14.48	%	32.38	%	2.2	g/dL	NULL	NULL	NULL	NULL	149.67	mEq/L	6.37	mEq/L	9.93	mg/dL	110	mEq/L	166.33	mg/dL	NULL	NULL	25.67	mEq/L	7.09	units	52.5	mm Hg	106.75	mm Hg
13662179	20163738	82	1	UNKNOWN	Medicare	English	MARRIED	4.35	K/uL	3.39	m/uL	3.34	K/uL	0.37	K/uL	121.5	K/uL	9.9	g/dL	18.7	%	29.35	%	NULL	NULL	NULL	NULL	NULL	NULL	137.5	mEq/L	4	mEq/L	8.8	mg/dL	103.5	mEq/L	160	mg/dL	NULL	NULL	12	mEq/L	NULL	NULL	NULL	NULL	NULL	NULL
13666088	24029851	75	1	WHITE	Medicare	English	MARRIED	14.5	K/uL	4.37	m/uL	NULL	NULL	NULL	NULL	269	K/uL	13.4	g/dL	14.1	%	42.1	%	NULL	NULL	NULL	NULL	NULL	NULL	138	mEq/L	4.3	mEq/L	8.5	mg/dL	103	mEq/L	209	mg/dL	NULL	NULL	16	mEq/L	NULL	NULL	NULL	NULL	NULL	NULL
13676021	22359409	82	1	UNKNOWN	Medicare	English	NULL	9.15	K/uL	3.49	m/uL	NULL	NULL	NULL	NULL	267.5	K/uL	10.4	g/dL	14	%	33.55	%	NULL	NULL	NULL	NULL	NULL	NULL	139.33	mEq/L	3.9	mEq/L	9.2	mg/dL	95.33	mEq/L	119.67	mg/dL	7.4	%	15.67	mEq/L	NULL	NULL	NULL	NULL	NULL	NULL
13677040	28297142	63	0	WHITE	Medicaid	English	SINGLE	9.5	K/uL	2.67	m/uL	NULL	NULL	NULL	NULL	240	K/uL	7.83	g/dL	16.63	%	25.03	%	NULL	NULL	NULL	NULL	NULL	NULL	130	mEq/L	4.6	mEq/L	8.6	mg/dL	91	mEq/L	90	mg/dL	NULL	NULL	11	mEq/L	7.41	units	41	mm Hg	152	mm Hg
13684008	27308516	58	0	WHITE	Medicare	English	WIDOWED	21.47	K/uL	2.93	m/uL	14.03	K/uL	1.32	K/uL	186.67	K/uL	9	g/dL	12.53	%	27.35	%	NULL	NULL	NULL	NULL	NULL	NULL	134	mEq/L	4.5	mEq/L	8.3	mg/dL	108.5	mEq/L	92	mg/dL	NULL	NULL	7	mEq/L	7.32	units	43	mm Hg	165.91	mm Hg
13687618	27513892	75	0	WHITE	Medicare	English	DIVORCED	4.1	K/uL	4.08	m/uL	NULL	NULL	NULL	NULL	137	K/uL	9.97	g/dL	18.97	%	36.83	%	3.5	g/dL	NULL	NULL	NULL	NULL	144.67	mEq/L	4.43	mEq/L	8.5	mg/dL	99.33	mEq/L	126.33	mg/dL	NULL	NULL	10.33	mEq/L	7.44	units	51.5	mm Hg	201	mm Hg
13688174	25157618	56	1	UNKNOWN	Private	English	SINGLE	12.7	K/uL	4.2	m/uL	NULL	NULL	NULL	NULL	190	K/uL	13	g/dL	12.5	%	38.5	%	NULL	NULL	NULL	NULL	NULL	NULL	136	mEq/L	4.8	mEq/L	8.1	mg/dL	101	mEq/L	126	mg/dL	NULL	NULL	14	mEq/L	7.34	units	43	mm Hg	135	mm Hg
13691379	25649697	75	1	WHITE	Medicare	English	MARRIED	6.2	K/uL	4.09	m/uL	NULL	NULL	NULL	NULL	168.5	K/uL	10.8	g/dL	15.75	%	36.4	%	NULL	NULL	NULL	NULL	NULL	NULL	140	mEq/L	3.95	mEq/L	8.75	mg/dL	96	mEq/L	133.5	mg/dL	NULL	NULL	17	mEq/L	NULL	NULL	NULL	NULL	NULL	NULL
13692505	21603373	84	1	WHITE	Medicare	English	MARRIED	7.8	K/uL	4.45	m/uL	NULL	NULL	NULL	NULL	255	K/uL	12.3	g/dL	15.1	%	37.7	%	NULL	NULL	NULL	NULL	NULL	NULL	141	mEq/L	3.55	mEq/L	8.45	mg/dL	107.5	mEq/L	169.5	mg/dL	NULL	NULL	13	mEq/L	7.44	units	33	mm Hg	50.5	mm Hg
13696678	27411800	61	1	ASIAN - CHINESE	Private	Chinese	MARRIED	11.8	K/uL	3.38	m/uL	NULL	NULL	NULL	NULL	101.5	K/uL	8.3	g/dL	16.7	%	26.9	%	NULL	NULL	NULL	NULL	5.8	g/dL	138	mEq/L	4.4	mEq/L	8.1	mg/dL	107	mEq/L	99	mg/dL	NULL	NULL	16	mEq/L	NULL	NULL	NULL	NULL	NULL	NULL
13718558	23781483	69	1	BLACK/AFRICAN AMERICAN	Medicare	English	MARRIED	4	K/uL	4.91	m/uL	NULL	NULL	NULL	NULL	198	K/uL	13.8	g/dL	16.6	%	41	%	NULL	NULL	NULL	NULL	NULL	NULL	142	mEq/L	4.1	mEq/L	9.1	mg/dL	105	mEq/L	97	mg/dL	NULL	NULL	15	mEq/L	NULL	NULL	NULL	NULL	NULL	NULL
13724944	21782748	67	0	WHITE - OTHER EUROPEAN	Medicare	English	SINGLE	17	K/uL	4.11	m/uL	NULL	NULL	NULL	NULL	334	K/uL	12	g/dL	15.4	%	40.1	%	NULL	NULL	NULL	NULL	NULL	NULL	136	mEq/L	6.8	mEq/L	8.1	mg/dL	107	mEq/L	114	mg/dL	NULL	NULL	12	mEq/L	7.14	units	62.17	mm Hg	68.83	mm Hg
13729279	24054987	71	1	WHITE	Other	English	SINGLE	21.1	K/uL	4.26	m/uL	NULL	NULL	NULL	NULL	242.67	K/uL	13.53	g/dL	14.4	%	42.77	%	NULL	NULL	NULL	NULL	NULL	NULL	140	mEq/L	4.67	mEq/L	8.63	mg/dL	99	mEq/L	184	mg/dL	NULL	NULL	9.33	mEq/L	7.3	units	72.43	mm Hg	124.86	mm Hg
13739949	22930433	63	1	UNABLE TO OBTAIN	Private	English	NULL	12.85	K/uL	5.65	m/uL	9.15	K/uL	1.3	K/uL	265	K/uL	16.95	g/dL	13.25	%	51.45	%	3.9	g/dL	NULL	NULL	NULL	NULL	139.5	mEq/L	4.8	mEq/L	8.9	mg/dL	101.5	mEq/L	112	mg/dL	NULL	NULL	13	mEq/L	7.3	units	57	mm Hg	188.5	mm Hg
13745030	26408777	61	1	WHITE	Medicare	English	SINGLE	23.42	K/uL	3.59	m/uL	21.56	K/uL	4.18	K/uL	127.6	K/uL	11.34	g/dL	14.48	%	35.02	%	3.5	g/dL	NULL	NULL	NULL	NULL	138	mEq/L	5.75	mEq/L	7.65	mg/dL	106	mEq/L	195.5	mg/dL	5.8	%	17.67	mEq/L	7.24	units	45.89	mm Hg	132	mm Hg
13751280	21529871	77	1	WHITE	Medicare	English	MARRIED	NULL	NULL	NULL	NULL	NULL	NULL	NULL	NULL	NULL	NULL	NULL	NULL	NULL	NULL	NULL	NULL	NULL	NULL	NULL	NULL	NULL	NULL	142	mEq/L	3.1	mEq/L	9.15	mg/dL	96.5	mEq/L	146.5	mg/dL	NULL	NULL	12	mEq/L	7.45	units	51	mm Hg	137	mm Hg
13754276	24040488	45	0	WHITE	Medicare	English	SINGLE	11.1	K/uL	3.97	m/uL	7.15	K/uL	2.71	K/uL	267	K/uL	10.2	g/dL	16.1	%	34.5	%	3.9	g/dL	NULL	NULL	NULL	NULL	137	mEq/L	3.9	mEq/L	9	mg/dL	105	mEq/L	115	mg/dL	NULL	NULL	17	mEq/L	NULL	NULL	NULL	NULL	NULL	NULL
13755585	24593340	70	1	WHITE	Medicaid	English	WIDOWED	4.95	K/uL	2.81	m/uL	NULL	NULL	NULL	NULL	114.5	K/uL	7.75	g/dL	21.05	%	26.35	%	3.4	g/dL	NULL	NULL	NULL	NULL	141	mEq/L	4.1	mEq/L	8.87	mg/dL	98.33	mEq/L	120	mg/dL	NULL	NULL	11.67	mEq/L	7.38	units	59	mm Hg	212	mm Hg
13755747	25368856	61	0	UNKNOWN	Private	English	DIVORCED	NULL	NULL	NULL	NULL	NULL	NULL	NULL	NULL	NULL	NULL	NULL	NULL	NULL	NULL	36.5	%	NULL	NULL	NULL	NULL	NULL	NULL	NULL	NULL	4.3	mEq/L	NULL	NULL	NULL	NULL	NULL	NULL	NULL	NULL	NULL	NULL	NULL	NULL	NULL	NULL	NULL	NULL
13755854	20731107	72	0	WHITE	Medicare	English	MARRIED	8.4	K/uL	4.5	m/uL	6.48	K/uL	1.17	K/uL	235	K/uL	13.6	g/dL	12.7	%	42.1	%	NULL	NULL	NULL	NULL	NULL	NULL	140	mEq/L	4.8	mEq/L	9.2	mg/dL	102	mEq/L	278	mg/dL	NULL	NULL	14	mEq/L	NULL	NULL	NULL	NULL	NULL	NULL
13756369	26238900	80	1	WHITE	Medicare	English	MARRIED	7.5	K/uL	5	m/uL	4.99	K/uL	0.91	K/uL	154	K/uL	15.4	g/dL	12.6	%	45.7	%	NULL	NULL	NULL	NULL	NULL	NULL	136	mEq/L	4.8	mEq/L	9.2	mg/dL	99	mEq/L	121	mg/dL	NULL	NULL	13	mEq/L	NULL	NULL	NULL	NULL	NULL	NULL
13762739	23663936	85	1	WHITE	Medicare	English	SINGLE	14.7	K/uL	4.37	m/uL	12.84	K/uL	0.52	K/uL	196	K/uL	13.1	g/dL	15.5	%	39.4	%	3.8	g/dL	NULL	NULL	NULL	NULL	139	mEq/L	4.1	mEq/L	NULL	NULL	102	mEq/L	151	mg/dL	NULL	NULL	21	mEq/L	NULL	NULL	NULL	NULL	NULL	NULL
13776637	25374154	70	1	UNKNOWN	Medicare	English	NULL	7.75	K/uL	4.24	m/uL	NULL	NULL	NULL	NULL	227	K/uL	13.1	g/dL	13.8	%	38.25	%	NULL	NULL	NULL	NULL	NULL	NULL	138	mEq/L	3.9	mEq/L	9.55	mg/dL	101	mEq/L	183.5	mg/dL	7.7	%	13	mEq/L	NULL	NULL	NULL	NULL	NULL	NULL
13783290	24377987	84	1	WHITE	Medicare	English	MARRIED	4.1	K/uL	3.71	m/uL	2.6	K/uL	0.8	K/uL	87	K/uL	10.5	g/dL	16.3	%	32.1	%	3	g/dL	NULL	NULL	NULL	NULL	142	mEq/L	4.2	mEq/L	8.2	mg/dL	103	mEq/L	85	mg/dL	NULL	NULL	14	mEq/L	NULL	NULL	NULL	NULL	NULL	NULL
13785306	23277759	58	1	WHITE	Medicare	English	MARRIED	5	K/uL	4.16	m/uL	3.48	K/uL	1.28	K/uL	157.5	K/uL	11.4	g/dL	14.15	%	35.4	%	3.2	g/dL	NULL	NULL	NULL	NULL	136.5	mEq/L	4.1	mEq/L	9.25	mg/dL	105.5	mEq/L	248.5	mg/dL	NULL	NULL	8.5	mEq/L	NULL	NULL	NULL	NULL	NULL	NULL
13791232	25434704	75	1	HISPANIC/LATINO - PUERTO RICAN	Medicare	Spanish	SINGLE	16.98	K/uL	4.08	m/uL	16.63	K/uL	0.9	K/uL	150.25	K/uL	11.2	g/dL	14.75	%	34.33	%	3.6	g/dL	NULL	NULL	NULL	NULL	131.75	mEq/L	3.78	mEq/L	7.43	mg/dL	98	mEq/L	146.5	mg/dL	5.6	%	20	mEq/L	7.4	units	33.5	mm Hg	41.75	mm Hg
13824977	26596549	69	1	WHITE	Medicare	English	SINGLE	5.9	K/uL	3.92	m/uL	NULL	NULL	NULL	NULL	326	K/uL	11.6	g/dL	15.9	%	33.4	%	3.6	g/dL	NULL	NULL	NULL	NULL	138	mEq/L	4.2	mEq/L	9.3	mg/dL	NULL	NULL	NULL	NULL	NULL	NULL	13	mEq/L	NULL	NULL	NULL	NULL	NULL	NULL
13842209	29565905	74	1	WHITE	Medicare	English	MARRIED	8.5	K/uL	4.49	m/uL	NULL	NULL	NULL	NULL	275	K/uL	12.5	g/dL	16.5	%	39.8	%	NULL	NULL	NULL	NULL	NULL	NULL	142	mEq/L	4.55	mEq/L	8.55	mg/dL	103	mEq/L	126.5	mg/dL	NULL	NULL	14.5	mEq/L	NULL	NULL	NULL	NULL	NULL	NULL
13843643	20742430	78	0	UNKNOWN	Medicare	English	SINGLE	8.45	K/uL	4.03	m/uL	7	K/uL	0.89	K/uL	172.5	K/uL	11	g/dL	14.3	%	35.6	%	NULL	NULL	NULL	NULL	NULL	NULL	140	mEq/L	5.25	mEq/L	9.85	mg/dL	103	mEq/L	123.5	mg/dL	NULL	NULL	12.5	mEq/L	NULL	NULL	NULL	NULL	NULL	NULL
13848479	27372695	87	0	WHITE	Medicare	English	WIDOWED	8	K/uL	3.61	m/uL	NULL	NULL	NULL	NULL	293	K/uL	10.1	g/dL	15	%	32.7	%	NULL	NULL	NULL	NULL	NULL	NULL	141	mEq/L	3	mEq/L	NULL	NULL	101	mEq/L	134	mg/dL	NULL	NULL	13	mEq/L	NULL	NULL	NULL	NULL	NULL	NULL
13855411	20317148	75	1	BLACK/AFRICAN AMERICAN	Medicare	English	NULL	12.55	K/uL	2.94	m/uL	NULL	NULL	NULL	NULL	63.5	K/uL	8.3	g/dL	17.65	%	27.45	%	2.8	g/dL	NULL	NULL	NULL	NULL	137	mEq/L	4.55	mEq/L	8.25	mg/dL	103.5	mEq/L	175.5	mg/dL	6.1	%	11.5	mEq/L	NULL	NULL	NULL	NULL	NULL	NULL
13861919	26105913	63	0	BLACK/CARIBBEAN ISLAND	Private	Haitian	MARRIED	10.85	K/uL	4.44	m/uL	NULL	NULL	NULL	NULL	NULL	K/uL	11.8	g/dL	14.05	%	38	%	4.15	g/dL	NULL	NULL	NULL	NULL	142.33	mEq/L	3.87	mEq/L	9.53	mg/dL	102.67	mEq/L	141.33	mg/dL	NULL	NULL	14.67	mEq/L	7.35	units	59	mm Hg	45	mm Hg
13865294	27056128	56	1	WHITE	Medicare	English	SINGLE	5.4	K/uL	3	m/uL	NULL	NULL	NULL	NULL	249	K/uL	8.9	g/dL	16.4	%	29.1	%	2.7	g/dL	NULL	NULL	NULL	NULL	144	mEq/L	4.2	mEq/L	8.7	mg/dL	110	mEq/L	119	mg/dL	NULL	NULL	14	mEq/L	NULL	NULL	NULL	NULL	NULL	NULL
13865704	24399300	70	1	WHITE	Other	English	SINGLE	8.4	K/uL	3.07	m/uL	6.24	K/uL	1.06	K/uL	245	K/uL	8.9	g/dL	14.4	%	25.2	%	NULL	NULL	NULL	NULL	NULL	NULL	144	mEq/L	3.9	mEq/L	8.6	mg/dL	108	mEq/L	94	mg/dL	NULL	NULL	20	mEq/L	NULL	NULL	NULL	NULL	NULL	NULL
13874120	29081505	78	1	OTHER	Medicaid	Portuguese	SINGLE	8.15	K/uL	3.84	m/uL	4.75	K/uL	2.58	K/uL	206.5	K/uL	11.45	g/dL	13.2	%	35.2	%	NULL	NULL	NULL	NULL	NULL	NULL	143	mEq/L	4.4	mEq/L	8.1	mg/dL	105	mEq/L	129.5	mg/dL	7.1	%	15	mEq/L	NULL	NULL	NULL	NULL	NULL	NULL
13877891	23498764	79	0	WHITE	Medicare	English	MARRIED	7	K/uL	3.92	m/uL	NULL	NULL	NULL	NULL	190	K/uL	12.8	g/dL	12.3	%	37	%	3.6	g/dL	NULL	NULL	NULL	NULL	131	mEq/L	3.75	mEq/L	8.38	mg/dL	92.75	mEq/L	179	mg/dL	NULL	NULL	15	mEq/L	NULL	NULL	NULL	NULL	NULL	NULL
13880428	29322831	67	0	WHITE	Medicare	English	SINGLE	4.8	K/uL	4.28	m/uL	NULL	NULL	NULL	NULL	211	K/uL	11.2	g/dL	15.7	%	36.8	%	NULL	NULL	NULL	NULL	NULL	NULL	142	mEq/L	4.2	mEq/L	8.9	mg/dL	96	mEq/L	273	mg/dL	NULL	NULL	18	mEq/L	NULL	NULL	NULL	NULL	NULL	NULL
13889911	23230271	68	1	WHITE	Medicare	English	MARRIED	20.9	K/uL	3.38	m/uL	NULL	NULL	NULL	NULL	269	K/uL	9.8	g/dL	17.5	%	31.3	%	NULL	NULL	NULL	NULL	NULL	NULL	130	mEq/L	4.9	mEq/L	9.2	mg/dL	91	mEq/L	129	mg/dL	NULL	NULL	15	mEq/L	7.42	units	39	mm Hg	66	mm Hg
13894716	29212314	76	1	WHITE	Medicare	English	MARRIED	9.9	K/uL	4.5	m/uL	10.14	K/uL	0.33	K/uL	227.25	K/uL	12.38	g/dL	15.8	%	41.78	%	2.05	g/dL	NULL	NULL	NULL	NULL	137.25	mEq/L	4.53	mEq/L	7	mg/dL	101.25	mEq/L	197.75	mg/dL	NULL	NULL	15	mEq/L	7.39	units	45.4	mm Hg	87.2	mm Hg
13907239	22511403	84	0	WHITE	Medicare	English	WIDOWED	8	K/uL	4.18	m/uL	NULL	NULL	NULL	NULL	154	K/uL	11	g/dL	14.6	%	36.9	%	NULL	NULL	NULL	NULL	NULL	NULL	136	mEq/L	4	mEq/L	8.4	mg/dL	93	mEq/L	268	mg/dL	NULL	NULL	19	mEq/L	NULL	NULL	NULL	NULL	NULL	NULL
13909349	21352926	72	0	WHITE	Medicare	English	MARRIED	7.1	K/uL	3.85	m/uL	NULL	NULL	NULL	NULL	202	K/uL	11.8	g/dL	12.5	%	35.6	%	NULL	NULL	NULL	NULL	NULL	NULL	131	mEq/L	4.4	mEq/L	8.9	mg/dL	95	mEq/L	208	mg/dL	NULL	NULL	11	mEq/L	NULL	NULL	NULL	NULL	NULL	NULL
13913813	25991513	91	1	WHITE	Medicare	English	WIDOWED	8.6	K/uL	2.53	m/uL	NULL	NULL	NULL	NULL	99	K/uL	8.2	g/dL	12.3	%	23.9	%	3.1	g/dL	NULL	NULL	NULL	NULL	138	mEq/L	3.7	mEq/L	8.5	mg/dL	102	mEq/L	129	mg/dL	NULL	NULL	11	mEq/L	NULL	NULL	NULL	NULL	NULL	NULL
13937186	22669855	67	1	WHITE	Medicare	English	MARRIED	NULL	NULL	NULL	NULL	NULL	NULL	NULL	NULL	NULL	NULL	NULL	NULL	NULL	NULL	NULL	NULL	NULL	NULL	NULL	NULL	NULL	NULL	NULL	NULL	NULL	NULL	NULL	NULL	NULL	NULL	NULL	NULL	NULL	NULL	NULL	NULL	NULL	NULL	NULL	NULL	NULL	NULL
13937999	27805667	57	1	WHITE	Medicare	English	MARRIED	NULL	NULL	NULL	NULL	NULL	NULL	NULL	NULL	NULL	NULL	NULL	NULL	NULL	NULL	NULL	NULL	NULL	NULL	NULL	NULL	NULL	NULL	NULL	NULL	NULL	NULL	NULL	NULL	NULL	NULL	NULL	NULL	NULL	NULL	NULL	NULL	NULL	NULL	NULL	NULL	NULL	NULL
13938164	25741063	83	0	WHITE - RUSSIAN	Medicare	Russian	MARRIED	6.4	K/uL	4.24	m/uL	5.63	K/uL	1.8	K/uL	211	K/uL	11.15	g/dL	17.95	%	33.1	%	NULL	NULL	NULL	NULL	NULL	NULL	120.5	mEq/L	3.75	mEq/L	7.85	mg/dL	89.5	mEq/L	66	mg/dL	NULL	NULL	12	mEq/L	NULL	NULL	NULL	NULL	NULL	NULL
13940603	27526116	42	0	WHITE	Private	English	MARRIED	13	K/uL	3.22	m/uL	8.64	K/uL	2.92	K/uL	430	K/uL	8	g/dL	17.5	%	25.3	%	3.1	g/dL	NULL	NULL	NULL	NULL	139	mEq/L	4.2	mEq/L	9.2	mg/dL	98	mEq/L	121	mg/dL	NULL	NULL	17	mEq/L	NULL	NULL	NULL	NULL	NULL	NULL
13940921	25141608	87	0	WHITE	Medicare	English	WIDOWED	16.2	K/uL	2.68	m/uL	12.99	K/uL	1.81	K/uL	459	K/uL	8.8	g/dL	13.5	%	26.4	%	3.4	g/dL	NULL	NULL	NULL	NULL	133	mEq/L	4.8	mEq/L	8.2	mg/dL	101	mEq/L	98	mg/dL	NULL	NULL	13	mEq/L	7.4	units	35	mm Hg	28	mm Hg
13941822	24587914	65	0	UNKNOWN	Medicare	English	NULL	5.9	K/uL	2.73	m/uL	NULL	NULL	NULL	NULL	73	K/uL	9.2	g/dL	16.2	%	27.9	%	2.4	g/dL	NULL	NULL	NULL	NULL	141	mEq/L	4	mEq/L	8.5	mg/dL	110	mEq/L	152	mg/dL	NULL	NULL	12	mEq/L	NULL	NULL	NULL	NULL	NULL	NULL
13959611	24332648	52	0	OTHER	Medicaid	English	NULL	5.6	K/uL	4.19	m/uL	5.04	K/uL	0.5	K/uL	257	K/uL	11.1	g/dL	16.2	%	39.5	%	NULL	NULL	NULL	NULL	NULL	NULL	142	mEq/L	4.1	mEq/L	8.2	mg/dL	110	mEq/L	120	mg/dL	NULL	NULL	14	mEq/L	7.27	units	56.67	mm Hg	136.67	mm Hg
13962646	28444933	50	1	WHITE	Medicare	English	SINGLE	5	K/uL	4.93	m/uL	NULL	NULL	NULL	NULL	230.5	K/uL	10.3	g/dL	18.6	%	37.2	%	NULL	NULL	NULL	NULL	NULL	NULL	138.5	mEq/L	4.4	mEq/L	8.3	mg/dL	101.5	mEq/L	184	mg/dL	NULL	NULL	19.5	mEq/L	7.33	units	49.67	mm Hg	74.33	mm Hg
13964231	22893353	61	0	WHITE	Private	English	DIVORCED	14.05	K/uL	3.88	m/uL	NULL	NULL	NULL	NULL	278.5	K/uL	11.55	g/dL	13.35	%	36.85	%	NULL	NULL	NULL	NULL	NULL	NULL	138	mEq/L	3.1	mEq/L	8.5	mg/dL	99	mEq/L	109	mg/dL	NULL	NULL	17	mEq/L	NULL	NULL	NULL	NULL	NULL	NULL
13964580	29967664	92	0	WHITE	Medicare	English	SINGLE	9.1	K/uL	3.32	m/uL	7.52	K/uL	0.72	K/uL	164	K/uL	10.2	g/dL	13.2	%	33.3	%	3.9	g/dL	NULL	NULL	NULL	NULL	143	mEq/L	4.3	mEq/L	9.1	mg/dL	102	mEq/L	169	mg/dL	NULL	NULL	11	mEq/L	NULL	NULL	NULL	NULL	NULL	NULL
13965044	20299716	91	1	WHITE	Medicare	English	WIDOWED	7.6	K/uL	3.11	m/uL	NULL	NULL	NULL	NULL	77.33	K/uL	9.45	g/dL	15.7	%	29.5	%	NULL	NULL	NULL	NULL	NULL	NULL	NULL	NULL	NULL	NULL	NULL	NULL	NULL	NULL	NULL	NULL	NULL	NULL	NULL	NULL	NULL	NULL	NULL	NULL	NULL	NULL
13982153	28038114	65	1	WHITE	Medicare	English	DIVORCED	11.55	K/uL	2.84	m/uL	8.45	K/uL	3.33	K/uL	166.5	K/uL	8.83	g/dL	16.08	%	27.73	%	2.7	g/dL	NULL	NULL	NULL	NULL	135	mEq/L	4.7	mEq/L	8.45	mg/dL	104	mEq/L	278	mg/dL	9.8	%	18	mEq/L	7.31	units	37.75	mm Hg	187	mm Hg
13984100	20836149	54	0	WHITE	Private	English	WIDOWED	13.7	K/uL	4.18	m/uL	NULL	NULL	NULL	NULL	591	K/uL	11.6	g/dL	14.8	%	38.5	%	NULL	NULL	NULL	NULL	NULL	NULL	137	mEq/L	4.3	mEq/L	9.5	mg/dL	100	mEq/L	173	mg/dL	NULL	NULL	14	mEq/L	NULL	NULL	NULL	NULL	NULL	NULL
13984677	25653601	65	0	WHITE	Private	English	MARRIED	1.1	K/uL	2.49	m/uL	0.66	K/uL	0.38	K/uL	28.5	K/uL	9	g/dL	15.75	%	28.2	%	3.6	g/dL	NULL	NULL	6.1	g/dL	147	mEq/L	4.4	mEq/L	9.3	mg/dL	109	mEq/L	174	mg/dL	NULL	NULL	13	mEq/L	NULL	NULL	NULL	NULL	NULL	NULL
13989807	28645215	71	0	WHITE	Medicare	English	MARRIED	NULL	NULL	NULL	NULL	NULL	NULL	NULL	NULL	NULL	NULL	NULL	NULL	NULL	NULL	NULL	NULL	NULL	NULL	NULL	NULL	NULL	NULL	NULL	NULL	NULL	NULL	NULL	NULL	NULL	NULL	NULL	NULL	NULL	NULL	NULL	NULL	NULL	NULL	NULL	NULL	NULL	NULL
14003516	26812358	65	0	WHITE	Medicare	English	SINGLE	8.6	K/uL	4.02	m/uL	NULL	NULL	NULL	NULL	225	K/uL	11.4	g/dL	13.1	%	33.4	%	NULL	NULL	NULL	NULL	NULL	NULL	125	mEq/L	3.4	mEq/L	8.8	mg/dL	84	mEq/L	143	mg/dL	NULL	NULL	14	mEq/L	7.42	units	45	mm Hg	60	mm Hg
14004875	28742078	62	1	WHITE - OTHER EUROPEAN	Medicaid	English	MARRIED	6.4	K/uL	2.16	m/uL	NULL	NULL	NULL	NULL	152.5	K/uL	6.95	g/dL	15.35	%	20.8	%	NULL	NULL	NULL	NULL	NULL	NULL	138	mEq/L	3.8	mEq/L	8.7	mg/dL	98	mEq/L	136.5	mg/dL	NULL	NULL	14.5	mEq/L	NULL	NULL	NULL	NULL	NULL	NULL
14008095	22783690	56	1	WHITE	Medicaid	English	MARRIED	13.6	K/uL	4.17	m/uL	NULL	NULL	NULL	NULL	422	K/uL	12.2	g/dL	12.1	%	35.8	%	3.6	g/dL	NULL	NULL	NULL	NULL	142	mEq/L	4	mEq/L	9.3	mg/dL	101	mEq/L	156	mg/dL	NULL	NULL	16	mEq/L	NULL	NULL	NULL	NULL	NULL	NULL
14010750	27770349	78	0	WHITE	Medicare	English	MARRIED	10.4	K/uL	3.62	m/uL	NULL	NULL	NULL	NULL	315	K/uL	10	g/dL	17.2	%	33.3	%	NULL	NULL	NULL	NULL	NULL	NULL	144.5	mEq/L	4.55	mEq/L	9.1	mg/dL	106.5	mEq/L	172	mg/dL	NULL	NULL	16	mEq/L	NULL	NULL	NULL	NULL	NULL	NULL
14018030	20347567	71	1	WHITE	Medicare	English	MARRIED	NULL	NULL	NULL	NULL	NULL	NULL	NULL	NULL	NULL	NULL	NULL	NULL	NULL	NULL	NULL	NULL	NULL	NULL	NULL	NULL	NULL	NULL	NULL	NULL	NULL	NULL	NULL	NULL	NULL	NULL	NULL	NULL	NULL	NULL	NULL	NULL	NULL	NULL	NULL	NULL	NULL	NULL
14018957	29800425	91	1	WHITE	Medicare	English	MARRIED	NULL	NULL	NULL	NULL	NULL	NULL	NULL	NULL	NULL	NULL	NULL	NULL	NULL	NULL	NULL	NULL	NULL	NULL	NULL	NULL	NULL	NULL	NULL	NULL	NULL	NULL	NULL	NULL	NULL	NULL	NULL	NULL	NULL	NULL	NULL	NULL	NULL	NULL	NULL	NULL	NULL	NULL
14041510	26602358	66	1	WHITE	Private	English	SINGLE	NULL	NULL	NULL	NULL	NULL	NULL	NULL	NULL	NULL	NULL	NULL	NULL	NULL	NULL	NULL	NULL	NULL	NULL	NULL	NULL	NULL	NULL	NULL	NULL	NULL	NULL	NULL	NULL	NULL	NULL	NULL	NULL	NULL	NULL	NULL	NULL	NULL	NULL	NULL	NULL	NULL	NULL
14052899	28937840	73	1	WHITE	Private	English	MARRIED	4.7	K/uL	4.47	m/uL	NULL	NULL	NULL	NULL	220	K/uL	13.3	g/dL	12.8	%	39.8	%	3.8	g/dL	NULL	NULL	NULL	NULL	135	mEq/L	4.6	mEq/L	9.3	mg/dL	95	mEq/L	85	mg/dL	NULL	NULL	13	mEq/L	NULL	NULL	NULL	NULL	NULL	NULL
14056063	21362701	77	1	WHITE	Medicare	English	SINGLE	7.6	K/uL	4.95	m/uL	NULL	NULL	NULL	NULL	189	K/uL	14.3	g/dL	15.8	%	43.5	%	NULL	NULL	NULL	NULL	NULL	NULL	136	mEq/L	4.1	mEq/L	8.6	mg/dL	103	mEq/L	84	mg/dL	NULL	NULL	10	mEq/L	NULL	NULL	NULL	NULL	NULL	NULL
14061271	25827482	89	1	WHITE	Medicare	English	MARRIED	15.4	K/uL	3.88	m/uL	NULL	NULL	NULL	NULL	166	K/uL	13.2	g/dL	15.4	%	41.2	%	NULL	NULL	NULL	NULL	NULL	NULL	144	mEq/L	4.8	mEq/L	9.9	mg/dL	106	mEq/L	123	mg/dL	NULL	NULL	16	mEq/L	NULL	NULL	NULL	NULL	NULL	NULL
14065385	22600031	69	1	WHITE	Medicare	English	SINGLE	NULL	NULL	NULL	NULL	NULL	NULL	NULL	NULL	NULL	NULL	NULL	NULL	NULL	NULL	NULL	NULL	NULL	NULL	NULL	NULL	NULL	NULL	NULL	NULL	NULL	NULL	NULL	NULL	NULL	NULL	NULL	NULL	NULL	NULL	NULL	NULL	NULL	NULL	NULL	NULL	NULL	NULL
14068105	25964222	80	1	UNKNOWN	Medicare	English	SINGLE	7.1	K/uL	3.51	m/uL	NULL	NULL	NULL	NULL	161	K/uL	12	g/dL	12.3	%	36.7	%	NULL	NULL	NULL	NULL	NULL	NULL	137	mEq/L	5.3	mEq/L	8.7	mg/dL	99	mEq/L	179	mg/dL	NULL	NULL	10	mEq/L	NULL	NULL	NULL	NULL	NULL	NULL
14078669	24490807	61	1	UNKNOWN	Private	English	NULL	8.3	K/uL	3.91	m/uL	NULL	NULL	NULL	NULL	200	K/uL	12.3	g/dL	13.3	%	36.3	%	NULL	NULL	NULL	NULL	NULL	NULL	138	mEq/L	4.2	mEq/L	9.8	mg/dL	105	mEq/L	291	mg/dL	NULL	NULL	13	mEq/L	NULL	NULL	NULL	NULL	NULL	NULL
14085120	22871611	74	1	ASIAN - CHINESE	Medicare	Chinese	MARRIED	10.1	K/uL	4.82	m/uL	4.08	K/uL	3.07	K/uL	276	K/uL	14.7	g/dL	12.8	%	44.5	%	4.7	g/dL	NULL	NULL	NULL	NULL	141	mEq/L	4.2	mEq/L	9.3	mg/dL	103	mEq/L	169	mg/dL	NULL	NULL	14	mEq/L	7.33	units	58	mm Hg	56	mm Hg
14091380	24162794	68	0	UNKNOWN	Private	Spanish	NULL	10.2	K/uL	4.34	m/uL	NULL	NULL	NULL	NULL	234	K/uL	10.85	g/dL	14.75	%	34.75	%	3.5	g/dL	NULL	NULL	NULL	NULL	139	mEq/L	4.4	mEq/L	8.7	mg/dL	101.5	mEq/L	187	mg/dL	11.4	%	11	mEq/L	NULL	NULL	NULL	NULL	NULL	NULL
14099520	28514827	71	1	WHITE	Medicare	English	MARRIED	9	K/uL	3.37	m/uL	NULL	NULL	NULL	NULL	203	K/uL	10.2	g/dL	15.3	%	31.8	%	3.4	g/dL	NULL	NULL	NULL	NULL	140	mEq/L	4.3	mEq/L	NULL	NULL	106	mEq/L	94	mg/dL	5.7	%	16	mEq/L	NULL	NULL	NULL	NULL	NULL	NULL
14107469	21502464	60	1	WHITE	Private	English	SINGLE	20.95	K/uL	2.91	m/uL	NULL	NULL	NULL	NULL	283	K/uL	8.45	g/dL	13.35	%	25.2	%	NULL	NULL	NULL	NULL	NULL	NULL	140	mEq/L	4.1	mEq/L	7.9	mg/dL	106	mEq/L	122	mg/dL	NULL	NULL	8	mEq/L	NULL	NULL	NULL	NULL	NULL	NULL
14111139	27305623	91	1	WHITE - OTHER EUROPEAN	Medicare	Italian	WIDOWED	9.25	K/uL	3.79	m/uL	NULL	NULL	NULL	NULL	132.5	K/uL	9.3	g/dL	14.55	%	30.3	%	NULL	NULL	NULL	NULL	NULL	NULL	134.33	mEq/L	3.9	mEq/L	8.5	mg/dL	101	mEq/L	106.33	mg/dL	NULL	NULL	12.33	mEq/L	7.36	units	44	mm Hg	90	mm Hg
14112444	25874109	82	0	WHITE	Medicare	Spanish	WIDOWED	10.9	K/uL	2.69	m/uL	NULL	NULL	NULL	NULL	121	K/uL	7.65	g/dL	18	%	25.2	%	3.1	g/dL	3.3	g/dL	6.4	g/dL	138	mEq/L	5.2	mEq/L	7.95	mg/dL	102.5	mEq/L	218	mg/dL	NULL	NULL	20.5	mEq/L	NULL	NULL	NULL	NULL	NULL	NULL
14113835	20173015	85	0	WHITE	Medicare	English	WIDOWED	7	K/uL	2.52	m/uL	2.88	K/uL	2.53	K/uL	267	K/uL	7.1	g/dL	15.7	%	22.2	%	2.7	g/dL	NULL	NULL	NULL	NULL	138	mEq/L	4.9	mEq/L	6.8	mg/dL	108	mEq/L	68	mg/dL	NULL	NULL	12	mEq/L	NULL	NULL	NULL	NULL	NULL	NULL
14119049	29082735	68	0	WHITE	Medicare	English	WIDOWED	5	K/uL	4.13	m/uL	2.63	K/uL	1.43	K/uL	88	K/uL	12.8	g/dL	13.9	%	40.2	%	3.1	g/dL	NULL	NULL	NULL	NULL	137	mEq/L	4.2	mEq/L	8.1	mg/dL	104	mEq/L	316	mg/dL	NULL	NULL	13	mEq/L	NULL	NULL	NULL	NULL	NULL	NULL
14128850	28375820	91	0	BLACK/AFRICAN AMERICAN	Medicare	English	DIVORCED	6.8	K/uL	3.28	m/uL	NULL	NULL	NULL	NULL	141	K/uL	9.8	g/dL	13.5	%	31.6	%	NULL	NULL	NULL	NULL	NULL	NULL	143	mEq/L	4.2	mEq/L	9	mg/dL	102	mEq/L	109	mg/dL	NULL	NULL	13	mEq/L	NULL	NULL	NULL	NULL	NULL	NULL
14132917	24583049	66	1	WHITE	Medicare	English	SINGLE	15	K/uL	3.2	m/uL	NULL	NULL	NULL	NULL	149	K/uL	7.6	g/dL	16.8	%	25.2	%	NULL	NULL	NULL	NULL	NULL	NULL	138	mEq/L	3.5	mEq/L	8.7	mg/dL	102	mEq/L	62	mg/dL	8.5	%	16	mEq/L	NULL	NULL	NULL	NULL	NULL	NULL
14141512	22311396	67	1	WHITE	Medicare	English	SINGLE	7.1	K/uL	5.02	m/uL	NULL	NULL	NULL	NULL	190	K/uL	13.4	g/dL	14.6	%	41.8	%	NULL	NULL	NULL	NULL	NULL	NULL	141	mEq/L	4.5	mEq/L	NULL	NULL	107	mEq/L	99	mg/dL	NULL	NULL	15	mEq/L	NULL	NULL	NULL	NULL	NULL	NULL
14142268	24179511	87	1	WHITE	Medicare	English	WIDOWED	7.7	K/uL	3.15	m/uL	NULL	NULL	NULL	NULL	309	K/uL	9.2	g/dL	13.9	%	27.9	%	NULL	NULL	NULL	NULL	NULL	NULL	139	mEq/L	3.65	mEq/L	9.3	mg/dL	94	mEq/L	151	mg/dL	NULL	NULL	13	mEq/L	NULL	NULL	NULL	NULL	NULL	NULL
14148206	21750093	52	1	WHITE	Medicaid	English	DIVORCED	6.7	K/uL	4.16	m/uL	3.37	K/uL	1.66	K/uL	98	K/uL	10.6	g/dL	17.5	%	35.1	%	NULL	NULL	NULL	NULL	NULL	NULL	136	mEq/L	3.7	mEq/L	9.2	mg/dL	101	mEq/L	84	mg/dL	NULL	NULL	12	mEq/L	NULL	NULL	NULL	NULL	NULL	NULL
14166121	25295174	80	0	WHITE	Medicare	English	SINGLE	17.4	K/uL	3.37	m/uL	12.41	K/uL	4.43	K/uL	191.67	K/uL	11.07	g/dL	14.6	%	32.83	%	3.8	g/dL	NULL	NULL	NULL	NULL	135.5	mEq/L	4.15	mEq/L	8.75	mg/dL	100.25	mEq/L	137.5	mg/dL	NULL	NULL	23.25	mEq/L	7.32	units	35.5	mm Hg	33	mm Hg
14178356	29189851	80	0	WHITE	Medicare	English	DIVORCED	10.5	K/uL	3.43	m/uL	NULL	NULL	NULL	NULL	67	K/uL	11.5	g/dL	15.4	%	34.7	%	NULL	NULL	NULL	NULL	NULL	NULL	138	mEq/L	3.1	mEq/L	8.4	mg/dL	102	mEq/L	134	mg/dL	NULL	NULL	15	mEq/L	NULL	NULL	NULL	NULL	NULL	NULL
14179454	23805339	67	0	OTHER	Medicare	English	SINGLE	9.6	K/uL	5.2	m/uL	NULL	NULL	NULL	NULL	311	K/uL	14.45	g/dL	13.2	%	43.6	%	NULL	NULL	NULL	NULL	NULL	NULL	139.67	mEq/L	3.77	mEq/L	9.87	mg/dL	101.67	mEq/L	134.67	mg/dL	6.9	%	13.67	mEq/L	NULL	NULL	NULL	NULL	NULL	NULL
14181973	25589253	86	1	WHITE - OTHER EUROPEAN	Medicare	English	MARRIED	14.66	K/uL	2.39	m/uL	NULL	NULL	NULL	NULL	301.8	K/uL	7.34	g/dL	19.62	%	23.9	%	NULL	NULL	NULL	NULL	NULL	NULL	132.4	mEq/L	5.4	mEq/L	8.06	mg/dL	97.8	mEq/L	105.2	mg/dL	NULL	NULL	10.8	mEq/L	NULL	NULL	NULL	NULL	NULL	NULL
14193219	28480416	92	1	WHITE	Medicare	English	MARRIED	NULL	NULL	NULL	NULL	NULL	NULL	NULL	NULL	NULL	NULL	NULL	NULL	NULL	NULL	NULL	NULL	NULL	NULL	NULL	NULL	NULL	NULL	NULL	NULL	4.7	mEq/L	NULL	NULL	NULL	NULL	NULL	NULL	NULL	NULL	NULL	NULL	NULL	NULL	NULL	NULL	NULL	NULL
14195695	23671820	65	0	WHITE	Medicare	English	DIVORCED	15.65	K/uL	3.48	m/uL	13.22	K/uL	2.44	K/uL	373	K/uL	11.4	g/dL	13.9	%	33.6	%	3.4	g/dL	NULL	NULL	NULL	NULL	139.5	mEq/L	3.9	mEq/L	8.3	mg/dL	98.75	mEq/L	232.75	mg/dL	6.3	%	16.5	mEq/L	7.36	units	46.5	mm Hg	39	mm Hg
14203788	22660668	68	1	BLACK/AFRICAN AMERICAN	Private	English	MARRIED	NULL	NULL	NULL	NULL	NULL	NULL	NULL	NULL	NULL	NULL	NULL	NULL	NULL	NULL	NULL	NULL	NULL	NULL	NULL	NULL	NULL	NULL	NULL	NULL	NULL	NULL	NULL	NULL	NULL	NULL	NULL	NULL	NULL	NULL	NULL	NULL	7.37	units	42	mm Hg	553	mm Hg
14206175	28885554	77	0	WHITE	Medicare	English	SINGLE	NULL	NULL	NULL	NULL	NULL	NULL	NULL	NULL	NULL	NULL	NULL	NULL	NULL	NULL	NULL	NULL	NULL	NULL	NULL	NULL	NULL	NULL	NULL	NULL	NULL	NULL	NULL	NULL	NULL	NULL	NULL	NULL	NULL	NULL	NULL	NULL	7.35	units	51	mm Hg	41	mm Hg
14208275	26400586	76	1	WHITE	Private	English	MARRIED	7.7	K/uL	2.89	m/uL	NULL	NULL	NULL	NULL	168.5	K/uL	8.75	g/dL	15.55	%	27.6	%	NULL	NULL	NULL	NULL	NULL	NULL	132.5	mEq/L	4.7	mEq/L	NULL	NULL	96.5	mEq/L	192.5	mg/dL	NULL	NULL	11.5	mEq/L	NULL	NULL	NULL	NULL	NULL	NULL
14216622	23348252	60	0	UNKNOWN	Medicaid	English	SINGLE	5.5	K/uL	3.58	m/uL	2.46	K/uL	2.33	K/uL	232	K/uL	11.2	g/dL	12.9	%	36	%	NULL	NULL	NULL	NULL	NULL	NULL	137	mEq/L	4.6	mEq/L	8.5	mg/dL	97	mEq/L	320	mg/dL	NULL	NULL	11	mEq/L	NULL	NULL	NULL	NULL	NULL	NULL
14218436	29373881	83	1	ASIAN - CHINESE	Medicare	Chinese	MARRIED	NULL	NULL	NULL	NULL	NULL	NULL	NULL	NULL	NULL	NULL	NULL	NULL	NULL	NULL	NULL	NULL	NULL	NULL	NULL	NULL	NULL	NULL	NULL	NULL	NULL	NULL	NULL	NULL	NULL	NULL	NULL	NULL	NULL	NULL	NULL	NULL	NULL	NULL	NULL	NULL	NULL	NULL
14219090	20508856	78	1	UNKNOWN	Medicare	English	NULL	16.1	K/uL	4.83	m/uL	NULL	NULL	NULL	NULL	270	K/uL	14.9	g/dL	13.37	%	46.13	%	NULL	NULL	NULL	NULL	NULL	NULL	135.5	mEq/L	6	mEq/L	8.57	mg/dL	97.67	mEq/L	172	mg/dL	NULL	NULL	13.33	mEq/L	7.28	units	56	mm Hg	94.6	mm Hg
14222609	20627230	80	0	WHITE	Medicare	English	WIDOWED	7.83	K/uL	2.71	m/uL	NULL	NULL	NULL	NULL	251.67	K/uL	8.17	g/dL	16.6	%	26.17	%	NULL	NULL	NULL	NULL	NULL	NULL	144.5	mEq/L	4.35	mEq/L	8.9	mg/dL	105.5	mEq/L	149.5	mg/dL	NULL	NULL	9.5	mEq/L	NULL	NULL	NULL	NULL	NULL	NULL
14227984	27952964	77	1	WHITE	Medicare	English	SINGLE	22.1	K/uL	3.77	m/uL	NULL	NULL	NULL	NULL	318	K/uL	10.7	g/dL	13.4	%	33.3	%	NULL	NULL	NULL	NULL	NULL	NULL	141	mEq/L	5.15	mEq/L	7.1	mg/dL	110	mEq/L	183.5	mg/dL	NULL	NULL	12.5	mEq/L	NULL	NULL	NULL	NULL	NULL	NULL
14230528	22010195	73	1	WHITE	Medicare	English	MARRIED	4.55	K/uL	2.96	m/uL	NULL	NULL	NULL	NULL	165.5	K/uL	7	g/dL	18.4	%	24.2	%	2.9	g/dL	NULL	NULL	NULL	NULL	139	mEq/L	4.1	mEq/L	8.5	mg/dL	103	mEq/L	125	mg/dL	NULL	NULL	17	mEq/L	NULL	NULL	NULL	NULL	NULL	NULL
14233532	23520330	65	0	WHITE	Medicare	English	DIVORCED	11.45	K/uL	2.41	m/uL	7.78	K/uL	1.01	K/uL	361.5	K/uL	6.95	g/dL	13.7	%	20.65	%	2.6	g/dL	3.3	g/dL	5.55	g/dL	126.5	mEq/L	5.7	mEq/L	7.6	mg/dL	90.25	mEq/L	166.5	mg/dL	5.6	%	23.5	mEq/L	7.2	units	41.1	mm Hg	70.3	mm Hg
14234409	29564976	63	0	WHITE	Private	English	MARRIED	14	K/uL	3.98	m/uL	NULL	NULL	NULL	NULL	244	K/uL	8.1	g/dL	20.3	%	27.1	%	3.6	g/dL	NULL	NULL	NULL	NULL	130.5	mEq/L	3.75	mEq/L	8.2	mg/dL	99	mEq/L	103.5	mg/dL	NULL	NULL	11.5	mEq/L	7.4	units	36	mm Hg	73	mm Hg
14250214	29037035	69	0	WHITE	Medicare	English	MARRIED	12.6	K/uL	3.83	m/uL	NULL	NULL	NULL	NULL	233	K/uL	11.4	g/dL	12.8	%	32.9	%	NULL	NULL	NULL	NULL	NULL	NULL	131	mEq/L	3.35	mEq/L	7.9	mg/dL	97.5	mEq/L	148	mg/dL	NULL	NULL	13	mEq/L	NULL	NULL	NULL	NULL	NULL	NULL
14252938	23693172	78	1	WHITE	Medicare	English	MARRIED	6.1	K/uL	3.4	m/uL	NULL	NULL	NULL	NULL	145	K/uL	11.9	g/dL	12.6	%	35.2	%	NULL	NULL	NULL	NULL	NULL	NULL	136	mEq/L	4.2	mEq/L	8.6	mg/dL	101	mEq/L	131	mg/dL	NULL	NULL	17	mEq/L	NULL	NULL	NULL	NULL	NULL	NULL
14259179	25004022	78	1	UNKNOWN	Medicare	English	MARRIED	7.2	K/uL	3.3	m/uL	NULL	NULL	NULL	NULL	209	K/uL	10.6	g/dL	16.8	%	32.3	%	4	g/dL	NULL	NULL	NULL	NULL	137.33	mEq/L	3.73	mEq/L	9.53	mg/dL	92.33	mEq/L	133.33	mg/dL	NULL	NULL	18.67	mEq/L	NULL	NULL	NULL	NULL	NULL	NULL
14261509	23823667	80	1	WHITE	Medicare	English	NULL	9.8	K/uL	3.93	m/uL	NULL	NULL	NULL	NULL	101	K/uL	10.85	g/dL	14.25	%	34.6	%	NULL	NULL	NULL	NULL	NULL	NULL	137	mEq/L	4.2	mEq/L	8.6	mg/dL	101.5	mEq/L	125.5	mg/dL	NULL	NULL	11	mEq/L	NULL	NULL	NULL	NULL	NULL	NULL
14266489	24237386	71	0	WHITE	Medicare	English	MARRIED	13.3	K/uL	4.06	m/uL	NULL	NULL	NULL	NULL	299	K/uL	11.6	g/dL	15.7	%	37.4	%	NULL	NULL	NULL	NULL	NULL	NULL	144.5	mEq/L	3.6	mEq/L	7.55	mg/dL	104	mEq/L	127.5	mg/dL	NULL	NULL	19	mEq/L	NULL	NULL	NULL	NULL	NULL	NULL
14290961	23799681	79	1	WHITE	Medicare	English	MARRIED	9.7	K/uL	3.29	m/uL	NULL	NULL	NULL	NULL	49	K/uL	10.5	g/dL	12.6	%	31.8	%	NULL	NULL	NULL	NULL	NULL	NULL	140.5	mEq/L	5.3	mEq/L	8.3	mg/dL	108	mEq/L	297.5	mg/dL	NULL	NULL	15	mEq/L	7.4	units	36	mm Hg	40	mm Hg
14301202	23214101	66	1	WHITE	Private	English	DIVORCED	15.9	K/uL	4.19	m/uL	NULL	NULL	NULL	NULL	207	K/uL	13.1	g/dL	12.2	%	37.2	%	NULL	NULL	NULL	NULL	NULL	NULL	135	mEq/L	4.2	mEq/L	NULL	NULL	94	mEq/L	437	mg/dL	9.6	%	15	mEq/L	NULL	NULL	NULL	NULL	NULL	NULL
14303226	29670402	60	0	WHITE	Medicaid	English	MARRIED	5	K/uL	4.53	m/uL	NULL	NULL	NULL	NULL	242.5	K/uL	13.5	g/dL	12.25	%	40.6	%	4.05	g/dL	NULL	NULL	NULL	NULL	142	mEq/L	4.5	mEq/L	9.5	mg/dL	105	mEq/L	222.5	mg/dL	NULL	NULL	14	mEq/L	NULL	NULL	NULL	NULL	NULL	NULL
14303299	23482217	74	1	UNKNOWN	Medicare	English	NULL	18.75	K/uL	2.71	m/uL	11.44	K/uL	1.94	K/uL	159.5	K/uL	8.9	g/dL	12.45	%	27.63	%	NULL	NULL	NULL	NULL	NULL	NULL	NULL	NULL	3.8	mEq/L	NULL	NULL	109	mEq/L	NULL	NULL	NULL	NULL	9	mEq/L	7.35	units	45.43	mm Hg	257.71	mm Hg
14303494	22410376	76	0	BLACK/AFRICAN AMERICAN	Medicare	English	WIDOWED	NULL	NULL	NULL	NULL	NULL	NULL	NULL	NULL	NULL	NULL	NULL	NULL	NULL	NULL	NULL	NULL	NULL	NULL	NULL	NULL	NULL	NULL	NULL	NULL	NULL	NULL	NULL	NULL	NULL	NULL	NULL	NULL	NULL	NULL	NULL	NULL	NULL	NULL	NULL	NULL	NULL	NULL
14304875	25118709	52	1	WHITE	Medicare	English	SINGLE	10.65	K/uL	4.34	m/uL	NULL	NULL	NULL	NULL	353.5	K/uL	9.4	g/dL	15.2	%	31.9	%	NULL	NULL	NULL	NULL	NULL	NULL	126.5	mEq/L	4.15	mEq/L	9.25	mg/dL	79	mEq/L	179.5	mg/dL	NULL	NULL	9	mEq/L	7.39	units	71.5	mm Hg	73	mm Hg
14308146	23624352	75	1	WHITE	Medicare	English	NULL	NULL	NULL	NULL	NULL	NULL	NULL	NULL	NULL	NULL	NULL	NULL	NULL	NULL	NULL	NULL	NULL	NULL	NULL	NULL	NULL	NULL	NULL	NULL	NULL	NULL	NULL	NULL	NULL	NULL	NULL	NULL	NULL	NULL	NULL	NULL	NULL	NULL	NULL	NULL	NULL	NULL	NULL
14311242	26661128	43	1	WHITE	Medicaid	English	SINGLE	7.8	K/uL	4.22	m/uL	NULL	NULL	NULL	NULL	150.5	K/uL	12.9	g/dL	13.15	%	39.65	%	NULL	NULL	NULL	NULL	NULL	NULL	138	mEq/L	4.25	mEq/L	9.8	mg/dL	98.5	mEq/L	223	mg/dL	9.7	%	15	mEq/L	NULL	NULL	NULL	NULL	NULL	NULL
14314429	27853284	58	0	UNKNOWN	Medicare	English	SINGLE	11.4	K/uL	3.94	m/uL	NULL	NULL	NULL	NULL	176	K/uL	11.2	g/dL	16.4	%	34.1	%	4.4	g/dL	NULL	NULL	NULL	NULL	139	mEq/L	4.1	mEq/L	9.2	mg/dL	102	mEq/L	126	mg/dL	NULL	NULL	17	mEq/L	NULL	NULL	NULL	NULL	NULL	NULL
14338643	23078461	57	0	BLACK/AFRICAN AMERICAN	Medicaid	English	SINGLE	7.9	K/uL	4.75	m/uL	7.09	K/uL	0.3	K/uL	98	K/uL	11	g/dL	14.3	%	34.5	%	3.7	g/dL	NULL	NULL	NULL	NULL	129	mEq/L	3.9	mEq/L	NULL	NULL	94	mEq/L	306	mg/dL	NULL	NULL	16	mEq/L	NULL	NULL	NULL	NULL	NULL	NULL
14343596	29902816	52	0	UNKNOWN	Medicaid	English	NULL	9.15	K/uL	4.42	m/uL	NULL	NULL	NULL	NULL	227.5	K/uL	10.4	g/dL	20.55	%	39.1	%	NULL	NULL	NULL	NULL	NULL	NULL	141.67	mEq/L	5.3	mEq/L	8.7	mg/dL	99.67	mEq/L	105	mg/dL	NULL	NULL	10.33	mEq/L	7.35	units	67	mm Hg	55	mm Hg
14345502	27539378	78	1	UNABLE TO OBTAIN	Medicaid	French	MARRIED	4.9	K/uL	3.91	m/uL	NULL	NULL	NULL	NULL	133	K/uL	11.8	g/dL	13.2	%	36.6	%	NULL	NULL	NULL	NULL	NULL	NULL	140.5	mEq/L	3.65	mEq/L	9.5	mg/dL	105	mEq/L	107.5	mg/dL	NULL	NULL	11	mEq/L	NULL	NULL	NULL	NULL	NULL	NULL
14345885	22849803	76	1	WHITE	Medicare	English	MARRIED	8.8	K/uL	4.69	m/uL	NULL	NULL	NULL	NULL	229	K/uL	14.4	g/dL	13.4	%	43.2	%	3.8	g/dL	NULL	NULL	NULL	NULL	143	mEq/L	4.6	mEq/L	9.1	mg/dL	105	mEq/L	75	mg/dL	6.8	%	11	mEq/L	NULL	NULL	NULL	NULL	NULL	NULL
14350791	28199410	79	1	ASIAN - SOUTH EAST ASIAN	Private	Other	MARRIED	8.3	K/uL	3.96	m/uL	NULL	NULL	NULL	NULL	343	K/uL	10.7	g/dL	13.2	%	33	%	3.4	g/dL	NULL	NULL	NULL	NULL	132.5	mEq/L	4.75	mEq/L	8.8	mg/dL	98.5	mEq/L	50.5	mg/dL	NULL	NULL	21.5	mEq/L	7.28	units	43	mm Hg	70	mm Hg
14360462	28669992	60	1	BLACK/AFRICAN AMERICAN	Medicare	English	MARRIED	10.9	K/uL	4.29	m/uL	7.34	K/uL	2.57	K/uL	197	K/uL	12.75	g/dL	11.75	%	39.5	%	NULL	NULL	NULL	NULL	NULL	NULL	139.33	mEq/L	3.83	mEq/L	8.9	mg/dL	104	mEq/L	236.67	mg/dL	9.6	%	14.67	mEq/L	7.41	units	39	mm Hg	71	mm Hg
14362898	23374659	68	1	WHITE	Medicare	English	MARRIED	6.7	K/uL	4.42	m/uL	NULL	NULL	NULL	NULL	82.5	K/uL	12.8	g/dL	13.65	%	40.55	%	4.2	g/dL	NULL	NULL	NULL	NULL	141	mEq/L	4	mEq/L	9.1	mg/dL	100	mEq/L	147	mg/dL	NULL	NULL	14	mEq/L	NULL	NULL	NULL	NULL	NULL	NULL
14377009	29863233	58	0	WHITE	Medicaid	English	SINGLE	NULL	NULL	NULL	NULL	NULL	NULL	NULL	NULL	NULL	NULL	NULL	NULL	NULL	NULL	NULL	NULL	NULL	NULL	NULL	NULL	NULL	NULL	NULL	NULL	NULL	NULL	NULL	NULL	NULL	NULL	NULL	NULL	NULL	NULL	NULL	NULL	NULL	NULL	NULL	NULL	NULL	NULL
14377211	23412904	88	1	WHITE - OTHER EUROPEAN	Medicare	English	MARRIED	7.65	K/uL	3.66	m/uL	NULL	NULL	NULL	NULL	212.5	K/uL	7.65	g/dL	18	%	25.5	%	NULL	NULL	NULL	NULL	NULL	NULL	142.5	mEq/L	4.23	mEq/L	8.65	mg/dL	105	mEq/L	94	mg/dL	NULL	NULL	16.25	mEq/L	7.36	units	48	mm Hg	43	mm Hg
14392629	23336950	91	1	WHITE	Medicare	English	MARRIED	5.8	K/uL	3.99	m/uL	NULL	NULL	NULL	NULL	116	K/uL	13	g/dL	15.5	%	41	%	NULL	NULL	NULL	NULL	NULL	NULL	144	mEq/L	4	mEq/L	9.2	mg/dL	107	mEq/L	93	mg/dL	NULL	NULL	13	mEq/L	NULL	NULL	NULL	NULL	NULL	NULL
14395214	29970322	58	1	ASIAN	Private	Chinese	SINGLE	3.53	K/uL	2.23	m/uL	2.41	K/uL	0.88	K/uL	114.33	K/uL	6.63	g/dL	20.4	%	21.3	%	2.3	g/dL	NULL	NULL	NULL	NULL	142	mEq/L	3.75	mEq/L	7	mg/dL	105.5	mEq/L	155.5	mg/dL	NULL	NULL	7.5	mEq/L	7.34	units	51	mm Hg	137	mm Hg
14396488	24485297	71	0	OTHER	NULL	Spanish	DIVORCED	NULL	NULL	NULL	NULL	NULL	NULL	NULL	NULL	NULL	NULL	NULL	NULL	NULL	NULL	NULL	NULL	NULL	NULL	NULL	NULL	NULL	NULL	NULL	NULL	NULL	NULL	NULL	NULL	NULL	NULL	NULL	NULL	NULL	NULL	NULL	NULL	NULL	NULL	NULL	NULL	NULL	NULL
14398235	24120675	76	0	WHITE	Medicare	English	MARRIED	5.9	K/uL	3.82	m/uL	NULL	NULL	NULL	NULL	237	K/uL	10	g/dL	15.7	%	32.3	%	NULL	NULL	NULL	NULL	NULL	NULL	141	mEq/L	3.7	mEq/L	9.3	mg/dL	107	mEq/L	152	mg/dL	NULL	NULL	13	mEq/L	NULL	NULL	NULL	NULL	NULL	NULL
14403945	23682783	62	0	WHITE	Private	English	SINGLE	14.5	K/uL	3.72	m/uL	NULL	NULL	NULL	NULL	208	K/uL	10.9	g/dL	15	%	34.2	%	NULL	NULL	NULL	NULL	NULL	NULL	135	mEq/L	3.8	mEq/L	8	mg/dL	105	mEq/L	105	mg/dL	NULL	NULL	6	mEq/L	NULL	NULL	NULL	NULL	NULL	NULL
14404575	23989419	70	0	WHITE	Medicare	English	DIVORCED	8.6	K/uL	2.95	m/uL	NULL	NULL	NULL	NULL	268	K/uL	6.4	g/dL	17.1	%	21.7	%	NULL	NULL	NULL	NULL	NULL	NULL	139	mEq/L	3.9	mEq/L	9.1	mg/dL	99	mEq/L	204	mg/dL	NULL	NULL	12	mEq/L	NULL	NULL	NULL	NULL	NULL	NULL
14415776	24722141	58	1	UNKNOWN	Medicaid	English	SINGLE	9.2	K/uL	3.19	m/uL	7.62	K/uL	0.75	K/uL	97	K/uL	9.5	g/dL	15.9	%	28	%	NULL	NULL	NULL	NULL	NULL	NULL	141	mEq/L	3	mEq/L	7.6	mg/dL	105	mEq/L	176	mg/dL	NULL	NULL	17	mEq/L	7.27	units	59	mm Hg	163	mm Hg
14416618	25297755	86	1	WHITE	Medicare	English	MARRIED	8.9	K/uL	3.32	m/uL	6	K/uL	0.78	K/uL	172.67	K/uL	9	g/dL	14.5	%	29.43	%	3.3	g/dL	NULL	NULL	NULL	NULL	133.33	mEq/L	4.67	mEq/L	7.17	mg/dL	98	mEq/L	157.33	mg/dL	NULL	NULL	16.67	mEq/L	7.34	units	50.25	mm Hg	65	mm Hg
14423359	25736023	66	1	WHITE	Medicare	English	MARRIED	11.93	K/uL	3.63	m/uL	8.86	K/uL	1.37	K/uL	127.5	K/uL	11.53	g/dL	14.28	%	34.6	%	NULL	NULL	NULL	NULL	NULL	NULL	NULL	NULL	4.2	mEq/L	NULL	NULL	111	mEq/L	NULL	NULL	NULL	NULL	10	mEq/L	7.34	units	51.13	mm Hg	211	mm Hg
14424253	28105716	66	0	WHITE	Medicare	English	SINGLE	NULL	NULL	NULL	NULL	NULL	NULL	NULL	NULL	NULL	NULL	NULL	NULL	NULL	NULL	NULL	NULL	NULL	NULL	NULL	NULL	NULL	NULL	NULL	NULL	NULL	NULL	NULL	NULL	NULL	NULL	NULL	NULL	NULL	NULL	NULL	NULL	NULL	NULL	NULL	NULL	NULL	NULL
14425066	21370194	69	0	WHITE	Medicare	English	MARRIED	9.5	K/uL	4.03	m/uL	NULL	NULL	NULL	NULL	171	K/uL	12.8	g/dL	13.2	%	40.3	%	NULL	NULL	NULL	NULL	NULL	NULL	142	mEq/L	4.7	mEq/L	NULL	NULL	108	mEq/L	159	mg/dL	NULL	NULL	9	mEq/L	7.32	units	51.83	mm Hg	144.67	mm Hg
14425981	25053973	75	0	ASIAN - CHINESE	Medicare	Chinese	WIDOWED	13.1	K/uL	3.84	m/uL	NULL	NULL	NULL	NULL	246	K/uL	10.8	g/dL	13.65	%	34.8	%	NULL	NULL	NULL	NULL	NULL	NULL	139.5	mEq/L	4.3	mEq/L	8.45	mg/dL	102.5	mEq/L	272	mg/dL	NULL	NULL	14	mEq/L	7.4	units	45	mm Hg	99	mm Hg
14436110	27731962	87	0	WHITE	Medicare	English	WIDOWED	NULL	NULL	NULL	NULL	NULL	NULL	NULL	NULL	NULL	NULL	NULL	NULL	NULL	NULL	NULL	NULL	NULL	NULL	NULL	NULL	NULL	NULL	NULL	NULL	NULL	NULL	NULL	NULL	NULL	NULL	NULL	NULL	NULL	NULL	NULL	NULL	NULL	NULL	NULL	NULL	NULL	NULL
14440794	22422434	40	0	WHITE	Medicare	English	MARRIED	11.7	K/uL	4.23	m/uL	NULL	NULL	NULL	NULL	195	K/uL	12.6	g/dL	12.8	%	37.9	%	NULL	NULL	NULL	NULL	NULL	NULL	140	mEq/L	3.8	mEq/L	7.7	mg/dL	105	mEq/L	146	mg/dL	NULL	NULL	12	mEq/L	NULL	NULL	NULL	NULL	NULL	NULL
14458151	27687854	80	1	WHITE	Medicare	English	NULL	11.5	K/uL	4.4	m/uL	NULL	NULL	NULL	NULL	387	K/uL	13.75	g/dL	14.35	%	40.6	%	3.45	g/dL	NULL	NULL	NULL	NULL	138.33	mEq/L	4.07	mEq/L	9.2	mg/dL	100.67	mEq/L	118.67	mg/dL	7.9	%	12	mEq/L	7.4	units	NULL	NULL	NULL	NULL
14468781	21428202	80	1	WHITE	Medicare	English	DIVORCED	6.93	K/uL	4.33	m/uL	NULL	NULL	NULL	NULL	171.33	K/uL	12.47	g/dL	17.1	%	38.97	%	3.2	g/dL	NULL	NULL	NULL	NULL	137	mEq/L	4.8	mEq/L	8.1	mg/dL	106	mEq/L	144	mg/dL	7.8	%	9	mEq/L	7.32	units	42	mm Hg	79	mm Hg
14471156	20900836	88	0	WHITE - OTHER EUROPEAN	Medicare	English	WIDOWED	10.3	K/uL	2.87	m/uL	NULL	NULL	NULL	NULL	197	K/uL	8.7	g/dL	17.7	%	27.6	%	NULL	NULL	NULL	NULL	NULL	NULL	140	mEq/L	4.9	mEq/L	NULL	NULL	108	mEq/L	161	mg/dL	NULL	NULL	7	mEq/L	NULL	NULL	NULL	NULL	NULL	NULL
14478525	28615116	72	1	BLACK/AFRICAN AMERICAN	Medicare	English	SINGLE	8.7	K/uL	3.89	m/uL	NULL	NULL	NULL	NULL	178	K/uL	8.9	g/dL	18.9	%	31.1	%	3.6	g/dL	NULL	NULL	NULL	NULL	136	mEq/L	3.9	mEq/L	9.1	mg/dL	96	mEq/L	261	mg/dL	12.1	%	14	mEq/L	NULL	NULL	NULL	NULL	NULL	NULL
14480006	20104413	57	0	WHITE	Medicaid	English	SINGLE	22.7	K/uL	4.63	m/uL	NULL	NULL	NULL	NULL	321	K/uL	12.5	g/dL	16.7	%	39	%	NULL	NULL	NULL	NULL	NULL	NULL	137	mEq/L	4.05	mEq/L	9.3	mg/dL	102	mEq/L	127	mg/dL	NULL	NULL	14	mEq/L	7.33	units	48.86	mm Hg	109.14	mm Hg
14485702	24980248	67	1	WHITE	Private	English	SINGLE	9.1	K/uL	4.44	m/uL	NULL	NULL	NULL	NULL	471.5	K/uL	8.75	g/dL	17.4	%	31.8	%	NULL	NULL	NULL	NULL	NULL	NULL	143.75	mEq/L	3.3	mEq/L	8.45	mg/dL	102	mEq/L	137	mg/dL	NULL	NULL	16	mEq/L	NULL	NULL	NULL	NULL	NULL	NULL
14485946	26025907	81	1	WHITE	Medicare	English	DIVORCED	13.9	K/uL	2.68	m/uL	NULL	NULL	NULL	NULL	183	K/uL	8.4	g/dL	16.1	%	27.9	%	2.9	g/dL	NULL	NULL	NULL	NULL	155.5	mEq/L	3.3	mEq/L	8.85	mg/dL	115	mEq/L	54.5	mg/dL	NULL	NULL	17.5	mEq/L	NULL	NULL	NULL	NULL	NULL	NULL
14489685	26101041	67	1	UNKNOWN	Medicaid	English	SINGLE	10.6	K/uL	3.76	m/uL	7.91	K/uL	1.21	K/uL	180	K/uL	11.5	g/dL	12.1	%	33.9	%	NULL	NULL	NULL	NULL	NULL	NULL	138	mEq/L	4.3	mEq/L	8.7	mg/dL	105	mEq/L	104	mg/dL	5.3	%	15	mEq/L	NULL	NULL	NULL	NULL	NULL	NULL
14491264	25171249	78	1	UNKNOWN	Medicare	English	MARRIED	9.3	K/uL	4.47	m/uL	8.17	K/uL	0.86	K/uL	180	K/uL	14	g/dL	14	%	41.1	%	NULL	NULL	NULL	NULL	NULL	NULL	136	mEq/L	4.7	mEq/L	NULL	NULL	102	mEq/L	168	mg/dL	NULL	NULL	19	mEq/L	NULL	NULL	NULL	NULL	NULL	NULL
14497879	24707182	83	1	WHITE	Medicare	English	SINGLE	12.4	K/uL	5.44	m/uL	8.93	K/uL	1.79	K/uL	222	K/uL	14.05	g/dL	19.4	%	45.05	%	NULL	NULL	NULL	NULL	5.5	g/dL	142	mEq/L	5	mEq/L	8.87	mg/dL	105.67	mEq/L	123.33	mg/dL	NULL	NULL	12.33	mEq/L	7.36	units	50	mm Hg	36	mm Hg
14505512	28417665	81	1	WHITE	Medicare	English	MARRIED	10.5	K/uL	3.67	m/uL	7.18	K/uL	1.47	K/uL	177	K/uL	11.8	g/dL	15.3	%	36.45	%	3.9	g/dL	NULL	NULL	NULL	NULL	137.78	mEq/L	4.73	mEq/L	7.9	mg/dL	100.78	mEq/L	258.22	mg/dL	NULL	NULL	20.11	mEq/L	7.17	units	54.44	mm Hg	80.67	mm Hg
14505633	25497394	71	1	ASIAN	Medicare	Chinese	MARRIED	3.6	K/uL	5.17	m/uL	NULL	NULL	NULL	NULL	147	K/uL	15	g/dL	13.4	%	49.1	%	NULL	NULL	NULL	NULL	NULL	NULL	144.5	mEq/L	4.35	mEq/L	8.3	mg/dL	102	mEq/L	172.5	mg/dL	6.5	%	11	mEq/L	7.34	units	68.89	mm Hg	73.22	mm Hg
14512069	24299990	80	1	UNKNOWN	Medicare	English	NULL	9.4	K/uL	3.68	m/uL	NULL	NULL	NULL	NULL	206	K/uL	10.8	g/dL	15	%	30.8	%	3.2	g/dL	NULL	NULL	NULL	NULL	121	mEq/L	3.63	mEq/L	8.07	mg/dL	86	mEq/L	144.67	mg/dL	NULL	NULL	14.67	mEq/L	7.37	units	41	mm Hg	107	mm Hg
14515473	20578474	71	1	WHITE	Medicare	English	SINGLE	21.19	K/uL	3.47	m/uL	16.01	K/uL	1.72	K/uL	275.86	K/uL	9.31	g/dL	17.04	%	29.57	%	NULL	NULL	NULL	NULL	NULL	NULL	134.6	mEq/L	4.38	mEq/L	7.86	mg/dL	95.8	mEq/L	154.2	mg/dL	NULL	NULL	18.6	mEq/L	7.35	units	40.4	mm Hg	163.2	mm Hg
14525126	27706490	63	0	WHITE	Private	English	MARRIED	NULL	NULL	NULL	NULL	NULL	NULL	NULL	NULL	NULL	NULL	NULL	NULL	NULL	NULL	NULL	NULL	NULL	NULL	NULL	NULL	NULL	NULL	NULL	NULL	NULL	NULL	NULL	NULL	NULL	NULL	NULL	NULL	NULL	NULL	NULL	NULL	NULL	NULL	NULL	NULL	NULL	NULL
14525514	24934281	63	1	WHITE	Private	English	MARRIED	7.9	K/uL	3.97	m/uL	NULL	NULL	NULL	NULL	191	K/uL	12.6	g/dL	13.8	%	37.3	%	NULL	NULL	NULL	NULL	NULL	NULL	140	mEq/L	4.5	mEq/L	8.9	mg/dL	100	mEq/L	144	mg/dL	NULL	NULL	11	mEq/L	NULL	NULL	NULL	NULL	NULL	NULL
14530150	25153267	86	0	ASIAN - CHINESE	Medicare	Chinese	WIDOWED	12.2	K/uL	3.86	m/uL	NULL	NULL	NULL	NULL	237	K/uL	12.1	g/dL	12.2	%	36.3	%	NULL	NULL	NULL	NULL	NULL	NULL	141	mEq/L	3.9	mEq/L	9	mg/dL	101	mEq/L	238	mg/dL	NULL	NULL	10	mEq/L	NULL	NULL	NULL	NULL	NULL	NULL
14534371	22949088	67	1	WHITE	Medicare	English	SINGLE	10.9	K/uL	4.09	m/uL	8.66	K/uL	0.87	K/uL	324	K/uL	7.9	g/dL	18.5	%	29.6	%	NULL	NULL	NULL	NULL	NULL	NULL	139	mEq/L	4.2	mEq/L	8.8	mg/dL	95	mEq/L	239	mg/dL	NULL	NULL	12	mEq/L	NULL	NULL	NULL	NULL	NULL	NULL
14542772	24401704	73	0	WHITE	Medicare	English	DIVORCED	11.1	K/uL	4.74	m/uL	NULL	NULL	NULL	NULL	143	K/uL	13.2	g/dL	14.6	%	44	%	NULL	NULL	NULL	NULL	NULL	NULL	146	mEq/L	4.9	mEq/L	9.1	mg/dL	104	mEq/L	142	mg/dL	NULL	NULL	12	mEq/L	NULL	NULL	NULL	NULL	NULL	NULL
14543908	21071561	71	0	WHITE	Medicaid	English	DIVORCED	7.5	K/uL	4.19	m/uL	NULL	NULL	NULL	NULL	278	K/uL	9.2	g/dL	20.9	%	30.8	%	NULL	NULL	NULL	NULL	NULL	NULL	143	mEq/L	4.7	mEq/L	9.1	mg/dL	104	mEq/L	146	mg/dL	NULL	NULL	16	mEq/L	NULL	NULL	NULL	NULL	NULL	NULL
14545542	23481869	88	1	WHITE - RUSSIAN	Medicare	English	MARRIED	NULL	NULL	NULL	NULL	NULL	NULL	NULL	NULL	NULL	NULL	NULL	NULL	NULL	NULL	NULL	NULL	NULL	NULL	NULL	NULL	NULL	NULL	NULL	NULL	NULL	NULL	NULL	NULL	NULL	NULL	NULL	NULL	NULL	NULL	NULL	NULL	NULL	NULL	NULL	NULL	NULL	NULL
14546827	20052453	69	0	BLACK/AFRICAN AMERICAN	Medicare	English	SINGLE	NULL	NULL	NULL	NULL	NULL	NULL	NULL	NULL	NULL	NULL	NULL	NULL	NULL	NULL	NULL	NULL	NULL	NULL	NULL	NULL	NULL	NULL	NULL	NULL	NULL	NULL	NULL	NULL	NULL	NULL	NULL	NULL	NULL	NULL	NULL	NULL	NULL	NULL	NULL	NULL	NULL	NULL
14575785	29077314	63	0	WHITE	Private	English	SINGLE	8.45	K/uL	5.21	m/uL	6.93	K/uL	1.09	K/uL	278	K/uL	15	g/dL	15.25	%	50.05	%	3.9	g/dL	NULL	NULL	NULL	NULL	133	mEq/L	5.07	mEq/L	9.1	mg/dL	88.67	mEq/L	185.33	mg/dL	NULL	NULL	11	mEq/L	7.35	units	70.5	mm Hg	55.5	mm Hg
14582949	27247224	63	0	WHITE	Medicaid	English	MARRIED	20.9	K/uL	3.78	m/uL	NULL	NULL	NULL	NULL	431	K/uL	11.4	g/dL	12	%	36.9	%	NULL	NULL	NULL	NULL	NULL	NULL	136	mEq/L	3.6	mEq/L	8.6	mg/dL	94	mEq/L	127	mg/dL	NULL	NULL	20	mEq/L	NULL	NULL	NULL	NULL	NULL	NULL
14595488	25063422	60	1	BLACK/AFRICAN AMERICAN	Medicaid	English	MARRIED	4.5	K/uL	4.12	m/uL	NULL	NULL	NULL	NULL	105.5	K/uL	11.3	g/dL	18.15	%	35.9	%	4	g/dL	NULL	NULL	NULL	NULL	148	mEq/L	3.8	mEq/L	9.5	mg/dL	101.67	mEq/L	92.33	mg/dL	NULL	NULL	10	mEq/L	7.41	units	57	mm Hg	84	mm Hg
14596003	29304679	67	1	WHITE	Private	English	MARRIED	10.2	K/uL	4.37	m/uL	NULL	NULL	NULL	NULL	218	K/uL	11.43	g/dL	18.43	%	35.7	%	3.9	g/dL	NULL	NULL	NULL	NULL	132.5	mEq/L	3.95	mEq/L	10.1	mg/dL	89.5	mEq/L	359	mg/dL	NULL	NULL	19.5	mEq/L	7.42	units	35	mm Hg	176.5	mm Hg
14597090	26156187	58	1	WHITE	Private	English	MARRIED	13.6	K/uL	3.88	m/uL	NULL	NULL	NULL	NULL	266.5	K/uL	10.5	g/dL	13.45	%	33.55	%	NULL	NULL	NULL	NULL	NULL	NULL	133.67	mEq/L	4.37	mEq/L	8.1	mg/dL	97.33	mEq/L	377.67	mg/dL	NULL	NULL	21.67	mEq/L	7.32	units	40	mm Hg	52	mm Hg
14598270	28073034	68	0	WHITE	Medicare	English	MARRIED	14.05	K/uL	4.94	m/uL	NULL	NULL	NULL	NULL	392.5	K/uL	13.3	g/dL	14.5	%	41.6	%	4.3	g/dL	NULL	NULL	NULL	NULL	139	mEq/L	3.65	mEq/L	10.75	mg/dL	102	mEq/L	159	mg/dL	NULL	NULL	9	mEq/L	NULL	NULL	NULL	NULL	NULL	NULL
14601818	21063846	72	1	HISPANIC/LATINO - PUERTO RICAN	Medicare	Spanish	SINGLE	7.5	K/uL	4.01	m/uL	NULL	NULL	NULL	NULL	187	K/uL	10.5	g/dL	14.2	%	32.5	%	NULL	NULL	NULL	NULL	NULL	NULL	128	mEq/L	4.3	mEq/L	8.5	mg/dL	96	mEq/L	366	mg/dL	8.5	%	14	mEq/L	NULL	NULL	NULL	NULL	NULL	NULL
14631985	27836369	66	0	WHITE	Medicaid	Portuguese	SINGLE	3.7	K/uL	3.85	m/uL	NULL	NULL	NULL	NULL	172	K/uL	11.45	g/dL	12.35	%	34.55	%	NULL	NULL	NULL	NULL	NULL	NULL	144.5	mEq/L	3.5	mEq/L	9.05	mg/dL	107	mEq/L	87.5	mg/dL	NULL	NULL	14.5	mEq/L	NULL	NULL	NULL	NULL	NULL	NULL
14634561	22636742	82	0	WHITE	Medicare	English	WIDOWED	1.75	K/uL	2.39	m/uL	1.32	K/uL	0.19	K/uL	271	K/uL	8.25	g/dL	23.6	%	24.75	%	3.4	g/dL	NULL	NULL	NULL	NULL	140	mEq/L	4.2	mEq/L	8.9	mg/dL	105	mEq/L	99	mg/dL	NULL	NULL	12	mEq/L	NULL	NULL	NULL	NULL	NULL	NULL
14651521	21467534	60	0	WHITE	Private	English	MARRIED	13	K/uL	5.41	m/uL	NULL	NULL	NULL	NULL	295	K/uL	14.7	g/dL	14.8	%	46.6	%	3.8	g/dL	3.4	g/dL	7.2	g/dL	141	mEq/L	4.2	mEq/L	9.5	mg/dL	101	mEq/L	138	mg/dL	7.7	%	14	mEq/L	NULL	NULL	NULL	NULL	NULL	NULL
14654110	23238259	75	0	UNKNOWN	Medicare	English	DIVORCED	19.8	K/uL	3.54	m/uL	NULL	NULL	NULL	NULL	295	K/uL	9.6	g/dL	15.4	%	31	%	NULL	NULL	NULL	NULL	NULL	NULL	141.5	mEq/L	4.17	mEq/L	9.4	mg/dL	104.67	mEq/L	249.5	mg/dL	NULL	NULL	10.5	mEq/L	7.44	units	35	mm Hg	96	mm Hg
14657386	20072758	82	1	WHITE	Medicare	English	SINGLE	7.7	K/uL	3.02	m/uL	NULL	NULL	NULL	NULL	178	K/uL	9.7	g/dL	12.6	%	30	%	NULL	NULL	NULL	NULL	NULL	NULL	135	mEq/L	4.6	mEq/L	8.6	mg/dL	95	mEq/L	145	mg/dL	NULL	NULL	12	mEq/L	7.42	units	42	mm Hg	186	mm Hg
14658632	25493723	61	1	WHITE	Medicaid	English	DIVORCED	14.1	K/uL	4.67	m/uL	NULL	NULL	NULL	NULL	170.67	K/uL	14.23	g/dL	13.8	%	45.33	%	3.1	g/dL	NULL	NULL	NULL	NULL	142.33	mEq/L	4.87	mEq/L	8.87	mg/dL	105.67	mEq/L	166.33	mg/dL	NULL	NULL	15.33	mEq/L	7.39	units	38.64	mm Hg	89.09	mm Hg
14661924	22712664	65	0	WHITE	Private	English	MARRIED	10.4	K/uL	4.12	m/uL	9.9	K/uL	1.04	K/uL	279	K/uL	13.7	g/dL	14.07	%	40.8	%	NULL	NULL	NULL	NULL	NULL	NULL	136.33	mEq/L	4.07	mEq/L	8.9	mg/dL	100.33	mEq/L	100.33	mg/dL	NULL	NULL	12	mEq/L	NULL	NULL	NULL	NULL	NULL	NULL
14663042	25270019	62	1	WHITE	Medicare	English	DIVORCED	8.1	K/uL	4.16	m/uL	NULL	NULL	NULL	NULL	208	K/uL	12.4	g/dL	13.3	%	36.8	%	NULL	NULL	NULL	NULL	NULL	NULL	139	mEq/L	3.8	mEq/L	8.9	mg/dL	103	mEq/L	64	mg/dL	6.7	%	12	mEq/L	NULL	NULL	NULL	NULL	NULL	NULL
14663261	20505845	55	1	WHITE	Medicare	English	DIVORCED	12.4	K/uL	5.34	m/uL	NULL	NULL	NULL	NULL	233	K/uL	16.4	g/dL	13.3	%	47.8	%	NULL	NULL	NULL	NULL	NULL	NULL	138	mEq/L	4.1	mEq/L	8.8	mg/dL	100	mEq/L	285	mg/dL	NULL	NULL	13	mEq/L	7.36	units	46	mm Hg	110	mm Hg
14675360	20538545	85	1	WHITE	Medicare	English	WIDOWED	7.2	K/uL	3.28	m/uL	NULL	NULL	NULL	NULL	246	K/uL	9.8	g/dL	15.2	%	30.1	%	NULL	NULL	NULL	NULL	NULL	NULL	134	mEq/L	3.9	mEq/L	8.8	mg/dL	95	mEq/L	127	mg/dL	NULL	NULL	14	mEq/L	NULL	NULL	NULL	NULL	NULL	NULL
14695439	22033102	64	1	UNKNOWN	Private	English	NULL	9.85	K/uL	3.64	m/uL	5.16	K/uL	1.54	K/uL	126	K/uL	9.85	g/dL	13.9	%	31.57	%	NULL	NULL	NULL	NULL	NULL	NULL	NULL	NULL	4.5	mEq/L	NULL	NULL	107	mEq/L	NULL	NULL	NULL	NULL	8	mEq/L	7.35	units	46.13	mm Hg	223.63	mm Hg
14702196	24304826	76	0	WHITE	Medicare	English	DIVORCED	12.6	K/uL	3.33	m/uL	NULL	NULL	NULL	NULL	211	K/uL	9.5	g/dL	15	%	30.8	%	2.9	g/dL	NULL	NULL	NULL	NULL	137	mEq/L	4.1	mEq/L	8.2	mg/dL	101	mEq/L	160	mg/dL	NULL	NULL	13	mEq/L	NULL	NULL	NULL	NULL	NULL	NULL
14702276	23200008	73	1	WHITE	Private	English	MARRIED	17.45	K/uL	4.86	m/uL	17.63	K/uL	0.37	K/uL	125	K/uL	15.25	g/dL	12.6	%	43.85	%	3.3	g/dL	NULL	NULL	NULL	NULL	144.17	mEq/L	4.7	mEq/L	7.67	mg/dL	114.17	mEq/L	298.5	mg/dL	15.4	%	21	mEq/L	7.22	units	43.83	mm Hg	36.83	mm Hg
14702656	28501908	65	0	BLACK/AFRICAN AMERICAN	Medicare	English	SINGLE	4.4	K/uL	3.25	m/uL	NULL	NULL	NULL	NULL	253	K/uL	9.8	g/dL	12	%	29.8	%	NULL	NULL	NULL	NULL	NULL	NULL	121	mEq/L	4.4	mEq/L	9.6	mg/dL	75	mEq/L	88	mg/dL	5.1	%	8	mEq/L	7.44	units	67	mm Hg	125	mm Hg
14703071	29257769	82	0	WHITE	Medicare	English	DIVORCED	NULL	NULL	NULL	NULL	NULL	NULL	NULL	NULL	NULL	NULL	NULL	NULL	NULL	NULL	NULL	NULL	NULL	NULL	NULL	NULL	NULL	NULL	NULL	NULL	NULL	NULL	NULL	NULL	NULL	NULL	NULL	NULL	NULL	NULL	NULL	NULL	NULL	NULL	NULL	NULL	NULL	NULL
14703400	23222802	66	0	WHITE - OTHER EUROPEAN	Medicare	English	MARRIED	12.7	K/uL	4.16	m/uL	NULL	NULL	NULL	NULL	144	K/uL	10.5	g/dL	18.3	%	37.7	%	NULL	NULL	NULL	NULL	NULL	NULL	135	mEq/L	4.7	mEq/L	8.6	mg/dL	104	mEq/L	160	mg/dL	NULL	NULL	11	mEq/L	7.36	units	54	mm Hg	51	mm Hg
14705225	25614970	79	1	WHITE	Medicare	English	SINGLE	9.5	K/uL	3.87	m/uL	NULL	NULL	NULL	NULL	121	K/uL	11.2	g/dL	15	%	35.6	%	NULL	NULL	NULL	NULL	NULL	NULL	140	mEq/L	4.2	mEq/L	8.4	mg/dL	104	mEq/L	169	mg/dL	NULL	NULL	13	mEq/L	NULL	NULL	NULL	NULL	NULL	NULL
14709737	26415761	50	1	WHITE	Medicare	English	SINGLE	10.07	K/uL	3.26	m/uL	10.95	K/uL	0.79	K/uL	222.33	K/uL	9.7	g/dL	14.33	%	31.03	%	2.3	g/dL	NULL	NULL	NULL	NULL	135.33	mEq/L	4.5	mEq/L	7.9	mg/dL	96.67	mEq/L	279	mg/dL	NULL	NULL	12.33	mEq/L	7.35	units	51.5	mm Hg	62.67	mm Hg
14711985	24381304	74	1	HISPANIC/LATINO - DOMINICAN	Medicaid	Spanish	SINGLE	7.9	K/uL	4.75	m/uL	NULL	NULL	NULL	NULL	325	K/uL	9.6	g/dL	19	%	32.7	%	NULL	NULL	NULL	NULL	NULL	NULL	145	mEq/L	4.1	mEq/L	9.45	mg/dL	103	mEq/L	147.5	mg/dL	NULL	NULL	14.5	mEq/L	NULL	NULL	NULL	NULL	NULL	NULL
14713556	25223576	88	0	WHITE	Medicare	English	MARRIED	16.6	K/uL	3.52	m/uL	NULL	NULL	NULL	NULL	117	K/uL	8.7	g/dL	18.2	%	28.9	%	NULL	NULL	NULL	NULL	NULL	NULL	143	mEq/L	4	mEq/L	7.8	mg/dL	112	mEq/L	148	mg/dL	NULL	NULL	14	mEq/L	7.28	units	40	mm Hg	41	mm Hg
14717337	28794845	60	0	UNKNOWN	Medicaid	English	WIDOWED	7.6	K/uL	3.45	m/uL	NULL	NULL	NULL	NULL	211	K/uL	9.7	g/dL	15	%	29.8	%	3.7	g/dL	NULL	NULL	NULL	NULL	140.33	mEq/L	3.4	mEq/L	9.07	mg/dL	97.67	mEq/L	296	mg/dL	NULL	NULL	15.33	mEq/L	7.41	units	47.33	mm Hg	106.33	mm Hg
14718662	22209456	81	0	WHITE	Medicare	English	MARRIED	19.93	K/uL	3.36	m/uL	16.36	K/uL	0.94	K/uL	137.67	K/uL	11.23	g/dL	15.03	%	37.43	%	3.75	g/dL	NULL	NULL	NULL	NULL	137.67	mEq/L	6.7	mEq/L	9	mg/dL	94.33	mEq/L	99	mg/dL	NULL	NULL	30.67	mEq/L	7.18	units	36.57	mm Hg	104.43	mm Hg
14719928	29200471	75	0	UNKNOWN	Medicare	English	MARRIED	16.25	K/uL	2.86	m/uL	NULL	NULL	NULL	NULL	201.5	K/uL	8.65	g/dL	14.65	%	27.6	%	NULL	NULL	NULL	NULL	NULL	NULL	139	mEq/L	3.95	mEq/L	8.1	mg/dL	98	mEq/L	158.5	mg/dL	NULL	NULL	15	mEq/L	NULL	NULL	NULL	NULL	NULL	NULL
14722153	28372489	83	0	WHITE	Medicare	English	MARRIED	5.7	K/uL	2.95	m/uL	NULL	NULL	NULL	NULL	186	K/uL	7.5	g/dL	29.1	%	24.6	%	2.8	g/dL	NULL	NULL	NULL	NULL	131	mEq/L	4.5	mEq/L	8.5	mg/dL	95	mEq/L	115	mg/dL	6.4	%	11	mEq/L	NULL	NULL	NULL	NULL	NULL	NULL
14725034	29472656	71	1	WHITE	Medicare	English	MARRIED	7.3	K/uL	4.3	m/uL	NULL	NULL	NULL	NULL	205	K/uL	12.8	g/dL	15.3	%	37.4	%	NULL	NULL	NULL	NULL	NULL	NULL	123.5	mEq/L	4.3	mEq/L	8.65	mg/dL	87	mEq/L	191.5	mg/dL	NULL	NULL	17.5	mEq/L	NULL	NULL	NULL	NULL	NULL	NULL
14730231	28744973	59	1	WHITE	Medicare	English	SINGLE	7.3	K/uL	4.86	m/uL	6.11	K/uL	0.28	K/uL	50	K/uL	11.45	g/dL	18.3	%	38.55	%	2.9	g/dL	NULL	NULL	NULL	NULL	138	mEq/L	3.55	mEq/L	8.15	mg/dL	97	mEq/L	134	mg/dL	NULL	NULL	15.5	mEq/L	7.31	units	56	mm Hg	38.5	mm Hg
14735684	27756599	65	1	HISPANIC/LATINO - DOMINICAN	Medicare	Spanish	SINGLE	NULL	NULL	NULL	NULL	NULL	NULL	NULL	NULL	NULL	NULL	NULL	NULL	NULL	NULL	NULL	NULL	NULL	NULL	NULL	NULL	NULL	NULL	NULL	NULL	NULL	NULL	NULL	NULL	NULL	NULL	NULL	NULL	NULL	NULL	NULL	NULL	NULL	NULL	NULL	NULL	NULL	NULL
14737153	29946843	75	1	WHITE	Medicare	English	MARRIED	27.6	K/uL	3.39	m/uL	NULL	NULL	NULL	NULL	168	K/uL	10.75	g/dL	16.8	%	33.5	%	NULL	NULL	NULL	NULL	NULL	NULL	140	mEq/L	4.95	mEq/L	8	mg/dL	100	mEq/L	185.5	mg/dL	NULL	NULL	21.5	mEq/L	7.28	units	47.5	mm Hg	47.5	mm Hg
14745087	24638217	59	0	BLACK/AFRICAN AMERICAN	Medicaid	English	SINGLE	NULL	NULL	NULL	NULL	NULL	NULL	NULL	NULL	NULL	NULL	NULL	NULL	NULL	NULL	NULL	NULL	NULL	NULL	NULL	NULL	NULL	NULL	NULL	NULL	NULL	NULL	NULL	NULL	NULL	NULL	NULL	NULL	NULL	NULL	NULL	NULL	NULL	NULL	NULL	NULL	NULL	NULL
14758994	23778808	76	0	WHITE	Medicare	English	WIDOWED	14.2	K/uL	4.42	m/uL	NULL	NULL	NULL	NULL	201	K/uL	13.9	g/dL	13.9	%	44.8	%	NULL	NULL	NULL	NULL	NULL	NULL	140	mEq/L	4	mEq/L	8.9	mg/dL	96	mEq/L	145	mg/dL	NULL	NULL	14	mEq/L	NULL	NULL	NULL	NULL	NULL	NULL
14762861	28677521	71	1	UNKNOWN	Medicare	English	SINGLE	12.3	K/uL	2.79	m/uL	9.5	K/uL	0.72	K/uL	267.33	K/uL	7.37	g/dL	18.33	%	24.2	%	NULL	NULL	NULL	NULL	NULL	NULL	137.67	mEq/L	3.87	mEq/L	8.3	mg/dL	101	mEq/L	187.33	mg/dL	NULL	NULL	15.33	mEq/L	7.41	units	37	mm Hg	49.5	mm Hg
14771014	21202196	65	1	UNKNOWN	Medicare	English	NULL	14.6	K/uL	2.98	m/uL	7.85	K/uL	0.85	K/uL	192	K/uL	9.57	g/dL	16.73	%	28.8	%	2.1	g/dL	NULL	NULL	NULL	NULL	130.8	mEq/L	3.7	mEq/L	7.36	mg/dL	103	mEq/L	156	mg/dL	NULL	NULL	19.4	mEq/L	7.26	units	28.29	mm Hg	210.86	mm Hg
14773618	26707256	74	1	WHITE	Medicare	English	DIVORCED	16.5	K/uL	3.1	m/uL	NULL	NULL	NULL	NULL	145.5	K/uL	10.25	g/dL	14.15	%	30.25	%	NULL	NULL	NULL	NULL	NULL	NULL	139	mEq/L	5.2	mEq/L	8.3	mg/dL	101	mEq/L	175	mg/dL	NULL	NULL	18	mEq/L	NULL	NULL	NULL	NULL	NULL	NULL
14773851	29362092	79	1	WHITE	Medicare	English	MARRIED	6.25	K/uL	4.07	m/uL	4.71	K/uL	0.76	K/uL	110.5	K/uL	11.6	g/dL	19.85	%	39.6	%	NULL	NULL	NULL	NULL	NULL	NULL	144	mEq/L	5.15	mEq/L	8.75	mg/dL	102	mEq/L	103.5	mg/dL	NULL	NULL	11.5	mEq/L	7.33	units	64.33	mm Hg	69.33	mm Hg
14775476	22285830	77	1	WHITE - OTHER EUROPEAN	Medicare	English	SINGLE	10.55	K/uL	4.14	m/uL	7.26	K/uL	2.08	K/uL	236	K/uL	12.1	g/dL	13.4	%	37.4	%	3.8	g/dL	NULL	NULL	NULL	NULL	135.5	mEq/L	3.55	mEq/L	9.4	mg/dL	102	mEq/L	105	mg/dL	NULL	NULL	13.5	mEq/L	NULL	NULL	NULL	NULL	NULL	NULL
14775758	25863787	82	0	UNABLE TO OBTAIN	Medicare	English	NULL	10.6	K/uL	3.61	m/uL	NULL	NULL	NULL	NULL	289	K/uL	9.3	g/dL	17.6	%	31	%	NULL	NULL	NULL	NULL	NULL	NULL	134	mEq/L	4.1	mEq/L	9.1	mg/dL	103	mEq/L	158	mg/dL	NULL	NULL	11	mEq/L	NULL	NULL	NULL	NULL	NULL	NULL
14775807	24991153	67	0	WHITE	Medicare	English	MARRIED	7.55	K/uL	3.71	m/uL	NULL	NULL	NULL	NULL	168.5	K/uL	10.4	g/dL	14.95	%	34	%	3.6	g/dL	NULL	NULL	NULL	NULL	142	mEq/L	4.75	mEq/L	9.4	mg/dL	98	mEq/L	106.5	mg/dL	8	%	12.5	mEq/L	NULL	NULL	NULL	NULL	NULL	NULL
14775926	21119010	56	0	WHITE	Medicaid	English	MARRIED	9	K/uL	7.04	m/uL	NULL	NULL	NULL	NULL	190	K/uL	15.8	g/dL	21	%	58.8	%	NULL	NULL	NULL	NULL	NULL	NULL	142.67	mEq/L	3.77	mEq/L	8.87	mg/dL	94.33	mEq/L	127.67	mg/dL	NULL	NULL	10.33	mEq/L	7.32	units	74.5	mm Hg	59	mm Hg
14776370	24035622	66	0	UNKNOWN	Medicare	English	SINGLE	4.1	K/uL	3.28	m/uL	NULL	NULL	NULL	NULL	98	K/uL	11.5	g/dL	13.7	%	36.2	%	NULL	NULL	NULL	NULL	NULL	NULL	144	mEq/L	5.1	mEq/L	8.8	mg/dL	105	mEq/L	146	mg/dL	NULL	NULL	14	mEq/L	7.4	units	47.5	mm Hg	77	mm Hg
14786890	22686312	78	1	WHITE	Medicare	English	DIVORCED	8.1	K/uL	3.95	m/uL	4.91	K/uL	2.3	K/uL	198	K/uL	11.9	g/dL	15.4	%	36.9	%	NULL	NULL	NULL	NULL	NULL	NULL	142	mEq/L	4.4	mEq/L	9.2	mg/dL	105	mEq/L	89	mg/dL	NULL	NULL	15	mEq/L	NULL	NULL	NULL	NULL	NULL	NULL
14789632	27938665	83	1	WHITE	Medicare	English	WIDOWED	3.4	K/uL	3.31	m/uL	NULL	NULL	NULL	NULL	54	K/uL	9.7	g/dL	13.9	%	30.05	%	NULL	NULL	NULL	NULL	NULL	NULL	134	mEq/L	5.1	mEq/L	8.8	mg/dL	101	mEq/L	98	mg/dL	NULL	NULL	15	mEq/L	NULL	NULL	NULL	NULL	NULL	NULL
14795905	27315152	68	1	WHITE	Medicare	English	SINGLE	8.6	K/uL	4.09	m/uL	NULL	NULL	NULL	NULL	204.5	K/uL	13	g/dL	13	%	37.9	%	NULL	NULL	NULL	NULL	NULL	NULL	138	mEq/L	4.5	mEq/L	NULL	NULL	104	mEq/L	197	mg/dL	NULL	NULL	13	mEq/L	NULL	NULL	NULL	NULL	NULL	NULL
14798613	26950310	74	1	WHITE	Medicare	English	SINGLE	13.3	K/uL	4.88	m/uL	11.6	K/uL	0.54	K/uL	115	K/uL	13.1	g/dL	13.4	%	39.5	%	NULL	NULL	NULL	NULL	NULL	NULL	134	mEq/L	3.4	mEq/L	8.2	mg/dL	101	mEq/L	174	mg/dL	NULL	NULL	15	mEq/L	7.49	units	28.33	mm Hg	62.33	mm Hg
14800040	23823341	57	1	WHITE	Medicare	English	WIDOWED	8.95	K/uL	5.13	m/uL	9.43	K/uL	1.75	K/uL	196	K/uL	13.5	g/dL	13	%	41.5	%	NULL	NULL	NULL	NULL	NULL	NULL	130	mEq/L	5.1	mEq/L	9.5	mg/dL	92.5	mEq/L	259	mg/dL	13.3	%	15	mEq/L	NULL	NULL	NULL	NULL	NULL	NULL
14805658	29549646	55	1	PATIENT DECLINED TO ANSWER	Medicare	English	DIVORCED	7.5	K/uL	4.47	m/uL	NULL	NULL	NULL	NULL	183	K/uL	12.6	g/dL	14.1	%	38	%	NULL	NULL	NULL	NULL	NULL	NULL	139	mEq/L	3.8	mEq/L	9.1	mg/dL	99	mEq/L	145	mg/dL	NULL	NULL	13	mEq/L	NULL	NULL	NULL	NULL	NULL	NULL
14809274	21639379	81	1	WHITE	Medicare	English	MARRIED	13.45	K/uL	4.15	m/uL	11.6	K/uL	0.33	K/uL	305.5	K/uL	12.45	g/dL	14.55	%	38.85	%	NULL	NULL	NULL	NULL	NULL	NULL	136.5	mEq/L	5.05	mEq/L	8.4	mg/dL	98.5	mEq/L	197	mg/dL	NULL	NULL	15	mEq/L	NULL	NULL	NULL	NULL	NULL	NULL
14815314	27115203	58	1	WHITE	Medicaid	English	NULL	NULL	NULL	NULL	NULL	NULL	NULL	NULL	NULL	NULL	NULL	NULL	NULL	NULL	NULL	NULL	NULL	NULL	NULL	NULL	NULL	NULL	NULL	NULL	NULL	NULL	NULL	NULL	NULL	NULL	NULL	NULL	NULL	NULL	NULL	NULL	NULL	NULL	NULL	NULL	NULL	NULL	NULL
14821158	24039749	67	1	UNKNOWN	NULL	English	MARRIED	30.1	K/uL	5.12	m/uL	25.76	K/uL	1.17	K/uL	145	K/uL	15.8	g/dL	13.3	%	57.1	%	3.3	g/dL	NULL	NULL	NULL	NULL	147	mEq/L	3.9	mEq/L	8.5	mg/dL	100	mEq/L	114	mg/dL	NULL	NULL	32	mEq/L	7.02	units	65.5	mm Hg	134	mm Hg
14824993	25041756	91	1	BLACK/CAPE VERDEAN	Medicare	Kabuverdianu	MARRIED	6.8	K/uL	4.17	m/uL	NULL	NULL	NULL	NULL	160.5	K/uL	12.6	g/dL	12.75	%	38.9	%	NULL	NULL	NULL	NULL	NULL	NULL	138.5	mEq/L	4.1	mEq/L	9.3	mg/dL	104.5	mEq/L	97.5	mg/dL	NULL	NULL	12	mEq/L	NULL	NULL	NULL	NULL	NULL	NULL
14825450	26160384	78	1	WHITE	Medicare	English	DIVORCED	10.8	K/uL	3.72	m/uL	NULL	NULL	NULL	NULL	194	K/uL	11.7	g/dL	14.6	%	37.1	%	NULL	NULL	NULL	NULL	NULL	NULL	142	mEq/L	4	mEq/L	NULL	NULL	105	mEq/L	80	mg/dL	NULL	NULL	10	mEq/L	NULL	NULL	NULL	NULL	NULL	NULL
14832177	29033546	61	0	WHITE	Medicaid	English	SINGLE	NULL	NULL	NULL	NULL	NULL	NULL	NULL	NULL	NULL	NULL	NULL	NULL	NULL	NULL	NULL	NULL	NULL	NULL	NULL	NULL	NULL	NULL	NULL	NULL	NULL	NULL	NULL	NULL	NULL	NULL	NULL	NULL	NULL	NULL	NULL	NULL	NULL	NULL	NULL	NULL	NULL	NULL
14838147	21415988	64	1	WHITE - OTHER EUROPEAN	Medicaid	English	MARRIED	NULL	NULL	NULL	NULL	NULL	NULL	NULL	NULL	NULL	NULL	NULL	NULL	NULL	NULL	NULL	NULL	NULL	NULL	NULL	NULL	NULL	NULL	NULL	NULL	NULL	NULL	NULL	NULL	NULL	NULL	NULL	NULL	NULL	NULL	NULL	NULL	7.39	units	42	mm Hg	262.38	mm Hg
14848660	24945050	78	1	UNKNOWN	Medicare	English	MARRIED	4.1	K/uL	3.72	m/uL	3.76	K/uL	0.31	K/uL	275	K/uL	9.8	g/dL	15.4	%	31.1	%	NULL	NULL	NULL	NULL	NULL	NULL	141	mEq/L	4.3	mEq/L	8.7	mg/dL	108	mEq/L	151	mg/dL	NULL	NULL	15	mEq/L	7.46	units	33	mm Hg	37	mm Hg
14870746	23486038	88	1	WHITE	Medicare	English	MARRIED	19.8	K/uL	3.01	m/uL	NULL	NULL	NULL	NULL	121	K/uL	8.4	g/dL	15.8	%	27.1	%	NULL	NULL	NULL	NULL	NULL	NULL	140	mEq/L	4.1	mEq/L	7.9	mg/dL	105	mEq/L	145	mg/dL	NULL	NULL	16	mEq/L	NULL	NULL	NULL	NULL	NULL	NULL
14872672	29294271	72	0	BLACK/AFRICAN	Medicare	English	SINGLE	NULL	NULL	NULL	NULL	NULL	NULL	NULL	NULL	NULL	NULL	NULL	NULL	NULL	NULL	NULL	NULL	NULL	NULL	NULL	NULL	NULL	NULL	NULL	NULL	NULL	NULL	NULL	NULL	NULL	NULL	NULL	NULL	NULL	NULL	NULL	NULL	NULL	NULL	NULL	NULL	NULL	NULL
14881763	29530101	69	1	WHITE	Medicare	English	WIDOWED	15.88	K/uL	3.24	m/uL	NULL	NULL	NULL	NULL	130.75	K/uL	10	g/dL	15.15	%	30.15	%	NULL	NULL	NULL	NULL	NULL	NULL	136	mEq/L	5.8	mEq/L	7.73	mg/dL	104.75	mEq/L	209.25	mg/dL	NULL	NULL	15.5	mEq/L	7.31	units	44.3	mm Hg	172.7	mm Hg
14885965	27214674	72	1	WHITE	Medicare	English	DIVORCED	12.2	K/uL	3.06	m/uL	NULL	NULL	NULL	NULL	570	K/uL	8.3	g/dL	17.7	%	26.9	%	NULL	NULL	NULL	NULL	NULL	NULL	140	mEq/L	4.9	mEq/L	8.9	mg/dL	103	mEq/L	148	mg/dL	NULL	NULL	14	mEq/L	NULL	NULL	NULL	NULL	NULL	NULL
14891723	21462201	72	0	WHITE	Private	English	MARRIED	9.3	K/uL	2.52	m/uL	NULL	NULL	NULL	NULL	288.5	K/uL	7.3	g/dL	15.9	%	24.1	%	3.8	g/dL	NULL	NULL	NULL	NULL	138	mEq/L	3.5	mEq/L	8.93	mg/dL	94.67	mEq/L	133.33	mg/dL	6.2	%	19.67	mEq/L	NULL	NULL	NULL	NULL	NULL	NULL
14897797	24497022	51	1	WHITE	Private	English	SINGLE	4.8	K/uL	4.39	m/uL	2.43	K/uL	1.35	K/uL	182	K/uL	12.25	g/dL	15.4	%	39.2	%	4	g/dL	2.5	g/dL	6.5	g/dL	139.5	mEq/L	4.75	mEq/L	9.1	mg/dL	99	mEq/L	227	mg/dL	10.1	%	14.5	mEq/L	NULL	NULL	NULL	NULL	NULL	NULL
14901435	20406365	80	1	WHITE	Medicare	English	SINGLE	6.2	K/uL	3.24	m/uL	NULL	NULL	NULL	NULL	95	K/uL	9.2	g/dL	22.5	%	30.6	%	NULL	NULL	NULL	NULL	NULL	NULL	NULL	NULL	NULL	NULL	NULL	NULL	NULL	NULL	NULL	NULL	NULL	NULL	NULL	NULL	NULL	NULL	NULL	NULL	NULL	NULL
14903260	28663136	69	1	WHITE	Medicare	English	SINGLE	6.85	K/uL	3.83	m/uL	4.4	K/uL	2.4	K/uL	278.5	K/uL	10.75	g/dL	14.6	%	33.65	%	3.2	g/dL	NULL	NULL	NULL	NULL	140.5	mEq/L	3.75	mEq/L	8.8	mg/dL	103.5	mEq/L	100.5	mg/dL	NULL	NULL	18.5	mEq/L	7.36	units	40	mm Hg	87	mm Hg
14903739	24950713	88	0	UNKNOWN	Medicare	English	NULL	13.15	K/uL	3.48	m/uL	NULL	NULL	NULL	NULL	224.5	K/uL	10.25	g/dL	13.55	%	31.7	%	NULL	NULL	NULL	NULL	NULL	NULL	138.5	mEq/L	4	mEq/L	7.65	mg/dL	108	mEq/L	117.5	mg/dL	5.7	%	14.5	mEq/L	7.38	units	33	mm Hg	180	mm Hg
14908858	26602586	81	1	UNKNOWN	Medicare	English	NULL	12.26	K/uL	2.48	m/uL	11.01	K/uL	0.64	K/uL	143	K/uL	8.46	g/dL	22.5	%	25.8	%	NULL	NULL	NULL	NULL	NULL	NULL	135	mEq/L	4.8	mEq/L	8.3	mg/dL	102	mEq/L	257	mg/dL	8.9	%	7	mEq/L	7.45	units	37	mm Hg	135	mm Hg
14912943	26133006	73	0	WHITE	Medicare	English	MARRIED	11.9	K/uL	3.02	m/uL	NULL	NULL	NULL	NULL	184	K/uL	9.2	g/dL	14.1	%	27.1	%	NULL	NULL	NULL	NULL	NULL	NULL	137	mEq/L	3.8	mEq/L	8.15	mg/dL	102	mEq/L	201	mg/dL	7.3	%	10	mEq/L	7.25	units	60	mm Hg	198	mm Hg
14922520	24976289	70	0	WHITE	Medicare	English	MARRIED	9.1	K/uL	2.88	m/uL	6.67	K/uL	1.31	K/uL	326	K/uL	8.3	g/dL	14.4	%	27.15	%	3.1	g/dL	NULL	NULL	NULL	NULL	133.5	mEq/L	4.1	mEq/L	8.35	mg/dL	88	mEq/L	136.5	mg/dL	NULL	NULL	11	mEq/L	7.32	units	75.5	mm Hg	109.5	mm Hg
14927425	27745192	76	0	WHITE	Medicare	English	MARRIED	NULL	NULL	NULL	NULL	NULL	NULL	NULL	NULL	NULL	NULL	NULL	NULL	NULL	NULL	NULL	NULL	NULL	NULL	NULL	NULL	NULL	NULL	NULL	NULL	NULL	NULL	NULL	NULL	NULL	NULL	NULL	NULL	NULL	NULL	NULL	NULL	NULL	NULL	NULL	NULL	NULL	NULL
14935152	24267314	70	1	WHITE - EASTERN EUROPEAN	Medicare	English	DIVORCED	11.4	K/uL	3.13	m/uL	NULL	NULL	NULL	NULL	265	K/uL	9.1	g/dL	15.5	%	28.2	%	3.9	g/dL	NULL	NULL	NULL	NULL	123	mEq/L	5.2	mEq/L	10.1	mg/dL	85.67	mEq/L	265.67	mg/dL	NULL	NULL	12.67	mEq/L	7.46	units	37.5	mm Hg	146	mm Hg
14938713	26933820	50	0	WHITE	Medicare	English	SINGLE	9.2	K/uL	3.83	m/uL	NULL	NULL	NULL	NULL	324	K/uL	10.9	g/dL	14.6	%	36.8	%	NULL	NULL	NULL	NULL	NULL	NULL	136	mEq/L	4.1	mEq/L	8.5	mg/dL	100	mEq/L	137	mg/dL	5.8	%	6	mEq/L	NULL	NULL	NULL	NULL	NULL	NULL
14944522	29573927	91	0	WHITE	Medicare	English	MARRIED	74.4	K/uL	3.03	m/uL	56.54	K/uL	2.98	K/uL	224	K/uL	10.9	g/dL	19.3	%	33.3	%	NULL	NULL	NULL	NULL	NULL	NULL	144	mEq/L	3.1	mEq/L	9	mg/dL	102	mEq/L	148	mg/dL	NULL	NULL	15	mEq/L	NULL	NULL	NULL	NULL	NULL	NULL
14948197	25632734	80	1	UNKNOWN	Medicare	English	NULL	15.9	K/uL	1.98	m/uL	13.31	K/uL	1.02	K/uL	436	K/uL	6.4	g/dL	14.4	%	20.9	%	2.1	g/dL	NULL	NULL	NULL	NULL	141	mEq/L	4.6	mEq/L	8.6	mg/dL	105	mEq/L	95	mg/dL	NULL	NULL	16	mEq/L	NULL	NULL	NULL	NULL	NULL	NULL
14948630	27694101	76	0	WHITE	Medicare	English	SINGLE	16.05	K/uL	3.6	m/uL	16.69	K/uL	0.72	K/uL	233.5	K/uL	11.3	g/dL	12.65	%	33.55	%	NULL	NULL	NULL	NULL	NULL	NULL	136.5	mEq/L	4.25	mEq/L	9.2	mg/dL	103	mEq/L	138	mg/dL	NULL	NULL	18	mEq/L	NULL	NULL	NULL	NULL	NULL	NULL
14954657	23690505	69	0	WHITE	Medicaid	English	SINGLE	NULL	NULL	NULL	NULL	NULL	NULL	NULL	NULL	NULL	NULL	NULL	NULL	NULL	NULL	NULL	NULL	NULL	NULL	NULL	NULL	NULL	NULL	NULL	NULL	NULL	NULL	NULL	NULL	NULL	NULL	NULL	NULL	NULL	NULL	NULL	NULL	NULL	NULL	NULL	NULL	NULL	NULL
14954981	27545283	81	0	WHITE	Medicare	English	MARRIED	9.3	K/uL	4.15	m/uL	NULL	NULL	NULL	NULL	335	K/uL	10.9	g/dL	15.4	%	35.8	%	NULL	NULL	NULL	NULL	NULL	NULL	140	mEq/L	3.8	mEq/L	8.4	mg/dL	101	mEq/L	153	mg/dL	NULL	NULL	13	mEq/L	NULL	NULL	NULL	NULL	NULL	NULL
14968494	26046600	78	0	BLACK/AFRICAN	Medicare	English	SINGLE	8.5	K/uL	3.03	m/uL	NULL	NULL	NULL	NULL	467	K/uL	7.7	g/dL	15	%	24.1	%	NULL	NULL	NULL	NULL	NULL	NULL	144	mEq/L	4.4	mEq/L	8.1	mg/dL	107	mEq/L	75	mg/dL	NULL	NULL	12	mEq/L	NULL	NULL	NULL	NULL	NULL	NULL
14984524	20555583	65	0	WHITE	Medicaid	English	DIVORCED	12.45	K/uL	5.41	m/uL	NULL	NULL	NULL	NULL	248	K/uL	15.7	g/dL	15.4	%	47.9	%	NULL	NULL	NULL	NULL	NULL	NULL	138	mEq/L	4.05	mEq/L	9.65	mg/dL	96.5	mEq/L	191	mg/dL	NULL	NULL	14	mEq/L	NULL	NULL	NULL	NULL	NULL	NULL
14992452	25027529	77	1	WHITE	Medicare	English	MARRIED	7.2	K/uL	4.89	m/uL	NULL	NULL	NULL	NULL	179	K/uL	14.2	g/dL	13.9	%	44.1	%	NULL	NULL	NULL	NULL	NULL	NULL	141	mEq/L	4	mEq/L	10	mg/dL	103	mEq/L	142	mg/dL	NULL	NULL	11	mEq/L	NULL	NULL	NULL	NULL	NULL	NULL
14996790	20673649	70	0	WHITE	Medicare	English	DIVORCED	5.75	K/uL	1.93	m/uL	NULL	NULL	NULL	NULL	135.5	K/uL	6.13	g/dL	14.6	%	18.6	%	2.6	g/dL	NULL	NULL	16.4	g/dL	131	mEq/L	3.74	mEq/L	11.32	mg/dL	99.4	mEq/L	127.4	mg/dL	NULL	NULL	9.8	mEq/L	7.38	units	NULL	NULL	NULL	NULL
14998166	26819437	64	1	WHITE - OTHER EUROPEAN	Private	English	MARRIED	10.65	K/uL	5.99	m/uL	NULL	NULL	NULL	NULL	133.5	K/uL	18	g/dL	14.45	%	56	%	3.4	g/dL	NULL	NULL	NULL	NULL	135	mEq/L	4.05	mEq/L	8.2	mg/dL	95	mEq/L	183.5	mg/dL	NULL	NULL	14.5	mEq/L	7.33	units	62.25	mm Hg	63.5	mm Hg
15019730	23016150	86	0	WHITE	Medicare	English	MARRIED	NULL	NULL	NULL	NULL	NULL	NULL	NULL	NULL	NULL	NULL	NULL	NULL	NULL	NULL	NULL	NULL	NULL	NULL	NULL	NULL	NULL	NULL	NULL	NULL	NULL	NULL	NULL	NULL	NULL	NULL	NULL	NULL	NULL	NULL	NULL	NULL	NULL	NULL	NULL	NULL	NULL	NULL
15021508	24677724	71	1	WHITE	Private	English	DIVORCED	9.4	K/uL	3.41	m/uL	NULL	NULL	NULL	NULL	336	K/uL	8.3	g/dL	18.9	%	28.8	%	NULL	NULL	NULL	NULL	NULL	NULL	141	mEq/L	4.7	mEq/L	8.2	mg/dL	106	mEq/L	302	mg/dL	NULL	NULL	13	mEq/L	NULL	NULL	NULL	NULL	NULL	NULL
15031111	27917559	71	1	UNKNOWN	Medicare	English	NULL	18.35	K/uL	4.73	m/uL	NULL	NULL	NULL	NULL	306.5	K/uL	14.95	g/dL	11.65	%	43.2	%	NULL	NULL	NULL	NULL	NULL	NULL	123.33	mEq/L	4.67	mEq/L	8.53	mg/dL	83.33	mEq/L	238.67	mg/dL	9.7	%	20.33	mEq/L	7.37	units	46.5	mm Hg	68.5	mm Hg
15040461	23758456	74	0	WHITE - OTHER EUROPEAN	Medicare	English	DIVORCED	21.8	K/uL	3.47	m/uL	NULL	NULL	NULL	NULL	276.5	K/uL	10.9	g/dL	13.7	%	33.9	%	3.4	g/dL	NULL	NULL	NULL	NULL	132	mEq/L	4.57	mEq/L	8.63	mg/dL	93	mEq/L	249.33	mg/dL	5.2	%	22.33	mEq/L	7.22	units	47	mm Hg	78.17	mm Hg
15051600	23135871	80	0	OTHER	Medicare	Portuguese	WIDOWED	9.95	K/uL	3.46	m/uL	9.06	K/uL	1.72	K/uL	203	K/uL	10.9	g/dL	11.9	%	33.65	%	3.8	g/dL	NULL	NULL	NULL	NULL	141	mEq/L	4.6	mEq/L	9	mg/dL	98	mEq/L	109	mg/dL	5.8	%	13	mEq/L	7.45	units	39	mm Hg	334.25	mm Hg
15055317	22491918	61	1	WHITE	Other	English	DIVORCED	12.7	K/uL	5.08	m/uL	NULL	NULL	NULL	NULL	260	K/uL	14.3	g/dL	13.9	%	44.3	%	NULL	NULL	NULL	NULL	NULL	NULL	140	mEq/L	4.5	mEq/L	8.8	mg/dL	103	mEq/L	159	mg/dL	NULL	NULL	14	mEq/L	NULL	NULL	NULL	NULL	NULL	NULL
15059385	24349007	84	0	WHITE	Medicare	English	SINGLE	NULL	NULL	NULL	NULL	NULL	NULL	NULL	NULL	NULL	NULL	NULL	NULL	NULL	NULL	NULL	NULL	NULL	NULL	NULL	NULL	NULL	NULL	NULL	NULL	NULL	NULL	NULL	NULL	NULL	NULL	NULL	NULL	NULL	NULL	NULL	NULL	NULL	NULL	NULL	NULL	NULL	NULL
15064845	20398106	73	1	WHITE	Medicare	English	MARRIED	6.3	K/uL	3.81	m/uL	NULL	NULL	NULL	NULL	221	K/uL	10.6	g/dL	18.7	%	32.9	%	NULL	NULL	NULL	NULL	NULL	NULL	142.5	mEq/L	3.9	mEq/L	8.5	mg/dL	103	mEq/L	129	mg/dL	NULL	NULL	14.5	mEq/L	NULL	NULL	NULL	NULL	NULL	NULL
15073390	25522354	76	1	WHITE	Medicare	English	MARRIED	18.6	K/uL	3.57	m/uL	15.95	K/uL	0.9	K/uL	139	K/uL	12.8	g/dL	13.7	%	36.9	%	NULL	NULL	NULL	NULL	NULL	NULL	135	mEq/L	4.9	mEq/L	8.6	mg/dL	99	mEq/L	147	mg/dL	NULL	NULL	13	mEq/L	NULL	NULL	NULL	NULL	NULL	NULL
15085967	26597360	61	0	WHITE	Private	English	MARRIED	12.3	K/uL	3.21	m/uL	NULL	NULL	NULL	NULL	260	K/uL	9.8	g/dL	12.4	%	30.4	%	NULL	NULL	NULL	NULL	NULL	NULL	136.5	mEq/L	4.95	mEq/L	9.25	mg/dL	98.5	mEq/L	117	mg/dL	NULL	NULL	16	mEq/L	NULL	NULL	NULL	NULL	NULL	NULL
15087805	21967128	66	1	BLACK/AFRICAN AMERICAN	Private	English	SINGLE	33.2	K/uL	3.43	m/uL	NULL	NULL	NULL	NULL	485	K/uL	10.3	g/dL	16.1	%	30.2	%	2.1	g/dL	NULL	NULL	NULL	NULL	134	mEq/L	4.2	mEq/L	8.5	mg/dL	98	mEq/L	134	mg/dL	NULL	NULL	11	mEq/L	NULL	NULL	NULL	NULL	NULL	NULL
15090925	20648118	71	1	UNABLE TO OBTAIN	Medicare	English	SINGLE	NULL	NULL	NULL	NULL	NULL	NULL	NULL	NULL	NULL	NULL	NULL	NULL	NULL	NULL	NULL	NULL	NULL	NULL	NULL	NULL	NULL	NULL	NULL	NULL	NULL	NULL	NULL	NULL	NULL	NULL	NULL	NULL	NULL	NULL	NULL	NULL	NULL	NULL	NULL	NULL	NULL	NULL
15096093	22367611	77	0	WHITE	Medicare	English	DIVORCED	11.6	K/uL	2.87	m/uL	NULL	NULL	NULL	NULL	299	K/uL	8.8	g/dL	15.5	%	28.6	%	NULL	NULL	NULL	NULL	NULL	NULL	138	mEq/L	3.7	mEq/L	8.7	mg/dL	101	mEq/L	90	mg/dL	NULL	NULL	10	mEq/L	NULL	NULL	NULL	NULL	NULL	NULL
15108502	29618334	74	0	WHITE	Medicare	English	MARRIED	22.7	K/uL	3.65	m/uL	NULL	NULL	NULL	NULL	761.5	K/uL	10.25	g/dL	16.95	%	32.95	%	NULL	NULL	NULL	NULL	NULL	NULL	139.5	mEq/L	4.1	mEq/L	9.35	mg/dL	104.5	mEq/L	95.5	mg/dL	NULL	NULL	13.5	mEq/L	NULL	NULL	NULL	NULL	NULL	NULL
15108559	26511791	77	1	WHITE	Private	English	SINGLE	11.7	K/uL	3.17	m/uL	6.42	K/uL	2.3	K/uL	105	K/uL	9.5	g/dL	14.6	%	28.3	%	NULL	NULL	NULL	NULL	NULL	NULL	NULL	NULL	5.05	mEq/L	NULL	NULL	111	mEq/L	NULL	NULL	NULL	NULL	9	mEq/L	7.35	units	41.43	mm Hg	303.86	mm Hg
15116275	21772722	81	0	HISPANIC/LATINO - PUERTO RICAN	Medicaid	Spanish	SINGLE	11.7	K/uL	4.53	m/uL	NULL	NULL	NULL	NULL	310	K/uL	10.8	g/dL	18.3	%	36.3	%	3.9	g/dL	NULL	NULL	NULL	NULL	138	mEq/L	3.7	mEq/L	9.5	mg/dL	97	mEq/L	115	mg/dL	6	%	13	mEq/L	NULL	NULL	NULL	NULL	NULL	NULL
15121922	24175976	67	1	BLACK/AFRICAN AMERICAN	Medicare	English	SINGLE	5.4	K/uL	3.33	m/uL	NULL	NULL	NULL	NULL	141	K/uL	9.4	g/dL	21.7	%	30.55	%	NULL	NULL	NULL	NULL	NULL	NULL	136	mEq/L	4.8	mEq/L	8.4	mg/dL	107	mEq/L	176.5	mg/dL	NULL	NULL	7.5	mEq/L	7.29	units	47	mm Hg	42	mm Hg
15127103	29819181	62	1	WHITE	Private	English	MARRIED	15.2	K/uL	3.98	m/uL	NULL	NULL	NULL	NULL	255	K/uL	11.5	g/dL	15.8	%	36.9	%	NULL	NULL	NULL	NULL	NULL	NULL	140	mEq/L	4.8	mEq/L	8.5	mg/dL	100	mEq/L	191	mg/dL	NULL	NULL	13	mEq/L	7.34	units	53	mm Hg	112	mm Hg
15138841	26702805	61	1	WHITE - OTHER EUROPEAN	Private	English	MARRIED	7.3	K/uL	3.18	m/uL	NULL	NULL	NULL	NULL	286.5	K/uL	9.05	g/dL	12.95	%	29.1	%	3.2	g/dL	NULL	NULL	NULL	NULL	142	mEq/L	3.8	mEq/L	8.4	mg/dL	107	mEq/L	97	mg/dL	NULL	NULL	10	mEq/L	NULL	NULL	NULL	NULL	NULL	NULL
15140077	21618777	80	0	WHITE	Medicare	English	MARRIED	11.5	K/uL	3.77	m/uL	NULL	NULL	NULL	NULL	202.5	K/uL	11.2	g/dL	14.55	%	36.25	%	NULL	NULL	NULL	NULL	NULL	NULL	135.5	mEq/L	4.85	mEq/L	8.65	mg/dL	99.5	mEq/L	189	mg/dL	NULL	NULL	14	mEq/L	NULL	NULL	NULL	NULL	NULL	NULL
15145227	29033641	62	0	WHITE	Medicare	English	SINGLE	6.8	K/uL	4.23	m/uL	NULL	NULL	NULL	NULL	157	K/uL	12.1	g/dL	18.3	%	37.8	%	3.7	g/dL	NULL	NULL	NULL	NULL	137	mEq/L	4	mEq/L	9.3	mg/dL	102	mEq/L	129	mg/dL	7.7	%	13	mEq/L	NULL	NULL	NULL	NULL	NULL	NULL
15146157	28262105	63	0	BLACK/AFRICAN AMERICAN	Medicare	English	SINGLE	8.9	K/uL	4.33	m/uL	NULL	NULL	NULL	NULL	265	K/uL	12.5	g/dL	14.7	%	39.1	%	3.8	g/dL	NULL	NULL	NULL	NULL	136	mEq/L	4.4	mEq/L	9.1	mg/dL	96	mEq/L	248	mg/dL	NULL	NULL	13	mEq/L	NULL	NULL	NULL	NULL	NULL	NULL
15146755	20961377	72	0	WHITE	Medicare	English	MARRIED	8.5	K/uL	3.67	m/uL	6.5	K/uL	0.77	K/uL	129.33	K/uL	8.57	g/dL	18	%	29.5	%	2.9	g/dL	NULL	NULL	NULL	NULL	142.67	mEq/L	3.77	mEq/L	7.97	mg/dL	103	mEq/L	224.67	mg/dL	11.2	%	16	mEq/L	7.36	units	54.38	mm Hg	65.5	mm Hg
15146844	23277572	77	1	WHITE	Medicare	English	SINGLE	12.2	K/uL	3.85	m/uL	8.15	K/uL	1.35	K/uL	117.67	K/uL	10.83	g/dL	13.2	%	34.47	%	NULL	NULL	NULL	NULL	NULL	NULL	138	mEq/L	4.3	mEq/L	8.6	mg/dL	102	mEq/L	181.5	mg/dL	NULL	NULL	10	mEq/L	7.37	units	48.6	mm Hg	57.2	mm Hg
15152987	26240105	91	1	WHITE	Medicare	English	SINGLE	7.6	K/uL	5.21	m/uL	4.58	K/uL	1.65	K/uL	183	K/uL	15.1	g/dL	14.6	%	48.2	%	NULL	NULL	NULL	NULL	NULL	NULL	140.5	mEq/L	4.9	mEq/L	8.4	mg/dL	110	mEq/L	102	mg/dL	NULL	NULL	12	mEq/L	NULL	NULL	NULL	NULL	NULL	NULL
15154025	24897210	68	1	WHITE	Medicare	English	SINGLE	6.75	K/uL	4.47	m/uL	NULL	NULL	NULL	NULL	108.5	K/uL	13.75	g/dL	13.7	%	41.55	%	NULL	NULL	NULL	NULL	NULL	NULL	144.5	mEq/L	3.95	mEq/L	8.75	mg/dL	109	mEq/L	266.5	mg/dL	NULL	NULL	10.5	mEq/L	7.28	units	56	mm Hg	40.5	mm Hg
15167397	21688850	84	1	WHITE	Medicare	English	MARRIED	19.2	K/uL	2.53	m/uL	NULL	NULL	NULL	NULL	275.67	K/uL	7.87	g/dL	15.03	%	24.1	%	NULL	NULL	NULL	NULL	NULL	NULL	136.67	mEq/L	3.97	mEq/L	7.6	mg/dL	101	mEq/L	91	mg/dL	NULL	NULL	20.33	mEq/L	7.4	units	31	mm Hg	59	mm Hg
15170847	28476129	75	1	WHITE	Medicare	English	MARRIED	9	K/uL	4.13	m/uL	NULL	NULL	NULL	NULL	191	K/uL	12.3	g/dL	13.7	%	37	%	NULL	NULL	NULL	NULL	NULL	NULL	139	mEq/L	4	mEq/L	8.7	mg/dL	100	mEq/L	167	mg/dL	NULL	NULL	16	mEq/L	NULL	NULL	NULL	NULL	NULL	NULL
15171726	28265564	88	1	WHITE	Medicare	English	WIDOWED	8.2	K/uL	3.65	m/uL	NULL	NULL	NULL	NULL	208	K/uL	10.9	g/dL	13.8	%	34.9	%	NULL	NULL	NULL	NULL	NULL	NULL	145	mEq/L	3.9	mEq/L	8.4	mg/dL	106	mEq/L	114	mg/dL	NULL	NULL	13	mEq/L	NULL	NULL	NULL	NULL	NULL	NULL
15172008	26590603	73	1	WHITE	Medicare	English	MARRIED	14.27	K/uL	3.33	m/uL	13.05	K/uL	1.05	K/uL	86.33	K/uL	10.27	g/dL	15.53	%	31.6	%	NULL	NULL	NULL	NULL	NULL	NULL	138	mEq/L	4.26	mEq/L	9.1	mg/dL	96.8	mEq/L	270.8	mg/dL	NULL	NULL	19	mEq/L	7.36	units	43	mm Hg	55	mm Hg
15181589	21053193	85	1	WHITE	Medicare	English	MARRIED	9.77	K/uL	3.38	m/uL	7.99	K/uL	1.07	K/uL	170	K/uL	9.6	g/dL	12.97	%	30.43	%	3.6	g/dL	NULL	NULL	NULL	NULL	138.67	mEq/L	4.47	mEq/L	8.5	mg/dL	106	mEq/L	224	mg/dL	NULL	NULL	10	mEq/L	NULL	NULL	NULL	NULL	NULL	NULL
15182873	27114977	71	0	WHITE	Medicare	English	DIVORCED	7.2	K/uL	3.67	m/uL	NULL	NULL	NULL	NULL	150	K/uL	11	g/dL	12.9	%	34.6	%	NULL	NULL	NULL	NULL	NULL	NULL	140	mEq/L	3.8	mEq/L	8.7	mg/dL	101	mEq/L	124	mg/dL	NULL	NULL	14	mEq/L	NULL	NULL	NULL	NULL	NULL	NULL
15204358	25271120	66	1	WHITE	Medicare	English	WIDOWED	6.3	K/uL	5.48	m/uL	NULL	NULL	NULL	NULL	223	K/uL	16.1	g/dL	14.3	%	50	%	NULL	NULL	NULL	NULL	NULL	NULL	141	mEq/L	3.7	mEq/L	9.6	mg/dL	102	mEq/L	98	mg/dL	NULL	NULL	11	mEq/L	NULL	NULL	NULL	NULL	NULL	NULL
15215744	20388591	70	0	WHITE	Medicare	English	MARRIED	9.5	K/uL	4.23	m/uL	NULL	NULL	NULL	NULL	239	K/uL	10.7	g/dL	15.9	%	35.4	%	NULL	NULL	NULL	NULL	NULL	NULL	142	mEq/L	4.3	mEq/L	8.6	mg/dL	105	mEq/L	96	mg/dL	NULL	NULL	14	mEq/L	NULL	NULL	NULL	NULL	NULL	NULL
15216123	22169165	60	1	WHITE	Medicare	English	SINGLE	NULL	NULL	NULL	NULL	NULL	NULL	NULL	NULL	NULL	NULL	NULL	NULL	NULL	NULL	NULL	NULL	NULL	NULL	NULL	NULL	NULL	NULL	NULL	NULL	NULL	NULL	NULL	NULL	NULL	NULL	NULL	NULL	NULL	NULL	NULL	NULL	NULL	NULL	NULL	NULL	NULL	NULL
15230275	23336131	65	1	ASIAN - CHINESE	Medicaid	Chinese	MARRIED	12	K/uL	4.51	m/uL	NULL	NULL	NULL	NULL	172	K/uL	13.5	g/dL	12.2	%	40.6	%	NULL	NULL	NULL	NULL	NULL	NULL	139	mEq/L	3.9	mEq/L	8.7	mg/dL	102	mEq/L	240	mg/dL	NULL	NULL	12	mEq/L	7.35	units	47	mm Hg	148	mm Hg
15234730	29246367	58	1	WHITE	Medicare	English	SINGLE	NULL	NULL	NULL	NULL	NULL	NULL	NULL	NULL	NULL	NULL	NULL	NULL	NULL	NULL	NULL	NULL	NULL	NULL	NULL	NULL	NULL	NULL	NULL	NULL	NULL	NULL	NULL	NULL	NULL	NULL	NULL	NULL	NULL	NULL	NULL	NULL	7.4	units	34	mm Hg	50.5	mm Hg
15236847	23117187	70	1	BLACK/AFRICAN AMERICAN	Medicare	English	MARRIED	9.5	K/uL	3.2	m/uL	NULL	NULL	NULL	NULL	212	K/uL	10.6	g/dL	12.8	%	30	%	3.8	g/dL	2.6	g/dL	6.4	g/dL	140	mEq/L	3.2	mEq/L	9.2	mg/dL	106	mEq/L	212	mg/dL	NULL	NULL	19.5	mEq/L	7.41	units	28	mm Hg	37	mm Hg
15236963	27810089	79	1	WHITE	Medicare	English	MARRIED	10.7	K/uL	4.91	m/uL	9.29	K/uL	2.09	K/uL	151.5	K/uL	13.8	g/dL	16.5	%	43.5	%	NULL	NULL	NULL	NULL	NULL	NULL	140.5	mEq/L	4.1	mEq/L	9.4	mg/dL	101.5	mEq/L	96	mg/dL	NULL	NULL	18	mEq/L	NULL	NULL	NULL	NULL	NULL	NULL
15238548	29992581	79	0	WHITE	Medicare	English	MARRIED	11.6	K/uL	3.69	m/uL	NULL	NULL	NULL	NULL	156.5	K/uL	11.05	g/dL	13.6	%	34.25	%	NULL	NULL	NULL	NULL	NULL	NULL	139	mEq/L	4.8	mEq/L	8.5	mg/dL	100.5	mEq/L	351.5	mg/dL	NULL	NULL	8	mEq/L	NULL	NULL	NULL	NULL	NULL	NULL
15239447	21289393	83	0	WHITE	Medicare	English	WIDOWED	7.1	K/uL	2.83	m/uL	NULL	NULL	NULL	NULL	172	K/uL	9.9	g/dL	13.2	%	31.4	%	NULL	NULL	NULL	NULL	NULL	NULL	148	mEq/L	3.95	mEq/L	9.65	mg/dL	103	mEq/L	104.5	mg/dL	NULL	NULL	22.5	mEq/L	NULL	NULL	NULL	NULL	NULL	NULL
15247919	22460908	82	1	WHITE	Medicare	Arabic	MARRIED	11.35	K/uL	4.47	m/uL	NULL	NULL	NULL	NULL	258	K/uL	11.85	g/dL	15.9	%	37.9	%	NULL	NULL	NULL	NULL	NULL	NULL	133.5	mEq/L	4.15	mEq/L	9.15	mg/dL	89	mEq/L	302	mg/dL	NULL	NULL	16	mEq/L	NULL	NULL	NULL	NULL	NULL	NULL
15248239	22955245	78	1	WHITE	Medicare	English	MARRIED	8.1	K/uL	2.7	m/uL	7.13	K/uL	0.49	K/uL	150	K/uL	8.4	g/dL	15.7	%	27.3	%	3.7	g/dL	NULL	NULL	NULL	NULL	140	mEq/L	4.9	mEq/L	9.6	mg/dL	93	mEq/L	193	mg/dL	NULL	NULL	19	mEq/L	7.42	units	59	mm Hg	111	mm Hg
15248565	26705577	69	0	WHITE	Medicare	English	MARRIED	19.9	K/uL	3.1	m/uL	13.87	K/uL	2.44	K/uL	231	K/uL	9.65	g/dL	13	%	27.2	%	NULL	NULL	NULL	NULL	NULL	NULL	NULL	NULL	5	mEq/L	NULL	NULL	103	mEq/L	NULL	NULL	NULL	NULL	12	mEq/L	7.4	units	33.67	mm Hg	286.5	mm Hg
15250384	21089417	87	1	BLACK/CARIBBEAN ISLAND	Medicare	Haitian	WIDOWED	7.05	K/uL	2.36	m/uL	NULL	NULL	NULL	NULL	200.5	K/uL	6.75	g/dL	15.05	%	21.95	%	3.3	g/dL	NULL	NULL	NULL	NULL	138.5	mEq/L	4.2	mEq/L	8.6	mg/dL	100.5	mEq/L	156.5	mg/dL	NULL	NULL	14.5	mEq/L	7.44	units	43.5	mm Hg	333	mm Hg
15259418	26616142	79	0	WHITE	Private	English	MARRIED	13.7	K/uL	3.41	m/uL	NULL	NULL	NULL	NULL	150	K/uL	10.8	g/dL	15.2	%	33.7	%	NULL	NULL	NULL	NULL	NULL	NULL	140	mEq/L	5.2	mEq/L	7.6	mg/dL	109	mEq/L	194	mg/dL	NULL	NULL	12	mEq/L	7.25	units	53	mm Hg	164	mm Hg
15272046	23939461	86	0	WHITE	Medicare	English	MARRIED	16	K/uL	3.61	m/uL	NULL	NULL	NULL	NULL	177	K/uL	11	g/dL	12.5	%	34.1	%	NULL	NULL	NULL	NULL	NULL	NULL	132	mEq/L	4.4	mEq/L	8	mg/dL	102	mEq/L	187	mg/dL	6.4	%	7	mEq/L	NULL	NULL	NULL	NULL	NULL	NULL
15281657	25693969	81	0	BLACK/AFRICAN AMERICAN	Medicare	Haitian	MARRIED	NULL	NULL	NULL	NULL	NULL	NULL	NULL	NULL	NULL	NULL	NULL	NULL	NULL	NULL	NULL	NULL	NULL	NULL	NULL	NULL	NULL	NULL	NULL	NULL	NULL	NULL	NULL	NULL	NULL	NULL	NULL	NULL	NULL	NULL	NULL	NULL	NULL	NULL	NULL	NULL	NULL	NULL
15291016	21741102	63	1	WHITE	Medicare	English	DIVORCED	5.38	K/uL	2.14	m/uL	4.24	K/uL	0.61	K/uL	56	K/uL	7.03	g/dL	18.43	%	21.43	%	2.6	g/dL	NULL	NULL	NULL	NULL	137	mEq/L	4.97	mEq/L	8.7	mg/dL	101.67	mEq/L	297.67	mg/dL	NULL	NULL	9.33	mEq/L	7.41	units	47.5	mm Hg	73	mm Hg
15293866	23881393	46	1	WHITE - EASTERN EUROPEAN	Other	English	MARRIED	10.65	K/uL	3.16	m/uL	7.02	K/uL	2.99	K/uL	87	K/uL	8.75	g/dL	15.27	%	28.02	%	3.4	g/dL	NULL	NULL	NULL	NULL	136	mEq/L	4.4	mEq/L	8	mg/dL	103	mEq/L	287.5	mg/dL	8.2	%	10	mEq/L	7.34	units	48.67	mm Hg	103.67	mm Hg
15296741	20000180	65	0	WHITE	Medicare	English	MARRIED	9.1	K/uL	4.05	m/uL	NULL	NULL	NULL	NULL	255	K/uL	10.7	g/dL	15.9	%	33.5	%	NULL	NULL	NULL	NULL	NULL	NULL	137	mEq/L	4	mEq/L	8.6	mg/dL	105	mEq/L	85	mg/dL	NULL	NULL	10	mEq/L	NULL	NULL	NULL	NULL	NULL	NULL
15296749	20470834	69	0	UNKNOWN	Medicare	English	NULL	NULL	NULL	NULL	NULL	NULL	NULL	NULL	NULL	NULL	NULL	NULL	NULL	NULL	NULL	NULL	NULL	NULL	NULL	NULL	NULL	NULL	NULL	NULL	NULL	NULL	NULL	NULL	NULL	NULL	NULL	NULL	NULL	NULL	NULL	NULL	NULL	NULL	NULL	NULL	NULL	NULL	NULL
15297888	26642075	69	0	NATIVE HAWAIIAN OR OTHER PACIFIC ISLANDER	Medicare	English	NULL	16.13	K/uL	4.51	m/uL	11.8	K/uL	4.31	K/uL	110.33	K/uL	15.73	g/dL	13.1	%	46.03	%	NULL	NULL	NULL	NULL	NULL	NULL	140.75	mEq/L	3.5	mEq/L	8.53	mg/dL	104.75	mEq/L	304.67	mg/dL	9.1	%	18.67	mEq/L	7.34	units	43.5	mm Hg	95.33	mm Hg
15313106	23232056	80	0	WHITE	Medicare	English	MARRIED	NULL	NULL	NULL	NULL	NULL	NULL	NULL	NULL	NULL	NULL	NULL	NULL	NULL	NULL	NULL	NULL	NULL	NULL	NULL	NULL	NULL	NULL	NULL	NULL	NULL	NULL	NULL	NULL	NULL	NULL	NULL	NULL	NULL	NULL	NULL	NULL	NULL	NULL	NULL	NULL	NULL	NULL
15316267	26664567	81	1	WHITE	Medicare	English	MARRIED	9.8	K/uL	4.01	m/uL	NULL	NULL	NULL	NULL	438	K/uL	12.1	g/dL	14.8	%	37.1	%	NULL	NULL	NULL	NULL	NULL	NULL	136	mEq/L	4.4	mEq/L	8.2	mg/dL	102	mEq/L	84	mg/dL	NULL	NULL	16	mEq/L	NULL	NULL	NULL	NULL	NULL	NULL
15320616	23117096	61	0	BLACK/AFRICAN AMERICAN	Private	English	MARRIED	4.2	K/uL	4.65	m/uL	NULL	NULL	NULL	NULL	242	K/uL	13.2	g/dL	13.2	%	39.9	%	NULL	NULL	NULL	NULL	NULL	NULL	139	mEq/L	4	mEq/L	9.3	mg/dL	105	mEq/L	129	mg/dL	NULL	NULL	9	mEq/L	NULL	NULL	NULL	NULL	NULL	NULL
15326906	29897730	76	0	OTHER	Medicare	English	MARRIED	19.2	K/uL	3.44	m/uL	NULL	NULL	NULL	NULL	258	K/uL	9.9	g/dL	12.9	%	31.9	%	NULL	NULL	NULL	NULL	NULL	NULL	NULL	NULL	NULL	NULL	NULL	NULL	NULL	NULL	NULL	NULL	NULL	NULL	NULL	NULL	7.26	units	59.5	mm Hg	101.75	mm Hg
15332054	28208947	73	1	WHITE	Medicare	English	SINGLE	11.5	K/uL	2.54	m/uL	NULL	NULL	NULL	NULL	152	K/uL	8.1	g/dL	17.4	%	27.8	%	3.5	g/dL	NULL	NULL	NULL	NULL	143	mEq/L	4.3	mEq/L	8.8	mg/dL	99	mEq/L	126	mg/dL	NULL	NULL	16	mEq/L	7.3	units	64	mm Hg	90	mm Hg
15341096	20143781	50	0	OTHER	Private	English	SINGLE	31.25	K/uL	1.99	m/uL	31.59	K/uL	1.4	K/uL	20	K/uL	6.55	g/dL	17.65	%	20	%	2	g/dL	NULL	NULL	NULL	NULL	125.33	mEq/L	4.7	mEq/L	8.7	mg/dL	94	mEq/L	94.33	mg/dL	NULL	NULL	17.33	mEq/L	7.28	units	44.67	mm Hg	72.5	mm Hg
15342059	22381611	69	1	WHITE	Medicaid	English	SINGLE	7.2	K/uL	3.87	m/uL	NULL	NULL	NULL	NULL	133	K/uL	11.5	g/dL	15.6	%	36.1	%	NULL	NULL	NULL	NULL	NULL	NULL	140	mEq/L	4	mEq/L	8.8	mg/dL	105	mEq/L	104	mg/dL	NULL	NULL	15	mEq/L	NULL	NULL	NULL	NULL	NULL	NULL
15344186	26177599	74	1	WHITE	Medicare	English	MARRIED	13.93	K/uL	2.68	m/uL	11.12	K/uL	1.35	K/uL	132.67	K/uL	8	g/dL	16.77	%	26.6	%	3.8	g/dL	NULL	NULL	NULL	NULL	140	mEq/L	4.2	mEq/L	9.2	mg/dL	107	mEq/L	166	mg/dL	5.4	%	11.5	mEq/L	7.38	units	39.57	mm Hg	172.57	mm Hg
15346378	24899558	76	1	WHITE	Medicare	English	WIDOWED	NULL	NULL	NULL	NULL	NULL	NULL	NULL	NULL	NULL	NULL	NULL	NULL	NULL	NULL	NULL	NULL	NULL	NULL	NULL	NULL	NULL	NULL	NULL	NULL	NULL	NULL	NULL	NULL	NULL	NULL	NULL	NULL	NULL	NULL	NULL	NULL	NULL	NULL	NULL	NULL	NULL	NULL
15354423	23619111	81	1	UNABLE TO OBTAIN	Medicare	English	NULL	19.9	K/uL	4.38	m/uL	18.4	K/uL	0.96	K/uL	299.5	K/uL	12.05	g/dL	15.9	%	38	%	NULL	NULL	NULL	NULL	NULL	NULL	140.5	mEq/L	4.27	mEq/L	8.85	mg/dL	104	mEq/L	243.5	mg/dL	NULL	NULL	13.5	mEq/L	NULL	NULL	NULL	NULL	NULL	NULL
15379667	21193689	76	1	WHITE	Medicare	English	SINGLE	18.27	K/uL	4.35	m/uL	17.24	K/uL	0.45	K/uL	259	K/uL	11.37	g/dL	17.2	%	36.6	%	2.35	g/dL	NULL	NULL	NULL	NULL	132.25	mEq/L	5.33	mEq/L	9.63	mg/dL	98	mEq/L	69	mg/dL	11	%	22.5	mEq/L	7.24	units	44.29	mm Hg	67.86	mm Hg
15394897	25650099	60	0	UNKNOWN	Medicare	English	NULL	19.85	K/uL	3.98	m/uL	NULL	NULL	NULL	NULL	337	K/uL	11.6	g/dL	13.45	%	35.5	%	2.45	g/dL	NULL	NULL	NULL	NULL	128	mEq/L	4.85	mEq/L	8.6	mg/dL	88.75	mEq/L	156	mg/dL	NULL	NULL	6.25	mEq/L	7.31	units	70.33	mm Hg	49.67	mm Hg
15403706	27135285	82	0	HISPANIC/LATINO - PUERTO RICAN	Medicare	Spanish	MARRIED	3.9	K/uL	3.35	m/uL	NULL	NULL	NULL	NULL	170	K/uL	11.2	g/dL	13.2	%	34.5	%	NULL	NULL	NULL	NULL	NULL	NULL	143	mEq/L	4	mEq/L	8.9	mg/dL	105	mEq/L	84	mg/dL	NULL	NULL	12	mEq/L	NULL	NULL	NULL	NULL	NULL	NULL
15403759	27161570	63	1	WHITE	Other	English	SINGLE	2.5	K/uL	2.74	m/uL	1.72	K/uL	0.34	K/uL	111.5	K/uL	8.45	g/dL	15.8	%	26.75	%	3.2	g/dL	NULL	NULL	NULL	NULL	140	mEq/L	4.95	mEq/L	8.7	mg/dL	102	mEq/L	193.5	mg/dL	NULL	NULL	16	mEq/L	7.34	units	43	mm Hg	62	mm Hg
15413327	28163447	71	0	WHITE	Medicare	English	NULL	9.25	K/uL	3.59	m/uL	NULL	NULL	NULL	NULL	244	K/uL	10.03	g/dL	13.9	%	31.93	%	NULL	NULL	NULL	NULL	NULL	NULL	142	mEq/L	4.2	mEq/L	8.4	mg/dL	103.5	mEq/L	103.5	mg/dL	NULL	NULL	11	mEq/L	NULL	NULL	NULL	NULL	NULL	NULL
15415198	27130995	70	0	WHITE	Medicare	English	DIVORCED	10.6	K/uL	3.44	m/uL	NULL	NULL	NULL	NULL	286	K/uL	10.2	g/dL	15.9	%	32.9	%	3.2	g/dL	NULL	NULL	NULL	NULL	139	mEq/L	4	mEq/L	9.3	mg/dL	96	mEq/L	144	mg/dL	NULL	NULL	10	mEq/L	7.43	units	54	mm Hg	191	mm Hg
15423466	24171835	55	1	BLACK/AFRICAN AMERICAN	Medicaid	English	SINGLE	NULL	NULL	NULL	NULL	NULL	NULL	NULL	NULL	NULL	NULL	NULL	NULL	NULL	NULL	NULL	NULL	NULL	NULL	NULL	NULL	NULL	NULL	NULL	NULL	NULL	NULL	NULL	NULL	NULL	NULL	NULL	NULL	NULL	NULL	NULL	NULL	NULL	NULL	NULL	NULL	NULL	NULL
15425363	22343282	69	1	BLACK/AFRICAN AMERICAN	Private	English	SINGLE	6.35	K/uL	5.55	m/uL	4.22	K/uL	1.41	K/uL	192.5	K/uL	15	g/dL	12.3	%	45.4	%	4.4	g/dL	NULL	NULL	NULL	NULL	136.67	mEq/L	4.63	mEq/L	9.3	mg/dL	99.33	mEq/L	384.67	mg/dL	10.8	%	9.67	mEq/L	7.32	units	69	mm Hg	22	mm Hg
15435415	25941472	55	1	OTHER	Private	English	MARRIED	11.8	K/uL	4.17	m/uL	5.85	K/uL	1.54	K/uL	150.5	K/uL	12.8	g/dL	13.05	%	38.9	%	NULL	NULL	NULL	NULL	NULL	NULL	NULL	NULL	4.4	mEq/L	NULL	NULL	106	mEq/L	NULL	NULL	NULL	NULL	14	mEq/L	7.36	units	45.14	mm Hg	261.71	mm Hg
15438504	23047930	71	0	WHITE	Medicare	English	WIDOWED	7.7	K/uL	3.72	m/uL	NULL	NULL	NULL	NULL	221	K/uL	10.9	g/dL	16.35	%	33.35	%	4	g/dL	NULL	NULL	NULL	NULL	139.5	mEq/L	4.25	mEq/L	7.6	mg/dL	101.5	mEq/L	86.5	mg/dL	NULL	NULL	15	mEq/L	7.41	units	36	mm Hg	325.5	mm Hg
15452591	26490052	62	1	WHITE	Medicare	English	SINGLE	7	K/uL	3.41	m/uL	NULL	NULL	NULL	NULL	117	K/uL	10.1	g/dL	14.9	%	32.4	%	NULL	NULL	NULL	NULL	NULL	NULL	146.5	mEq/L	3.85	mEq/L	8.7	mg/dL	109	mEq/L	134.5	mg/dL	NULL	NULL	20.5	mEq/L	7.33	units	46	mm Hg	172.5	mm Hg
15452777	21995369	68	1	WHITE	Private	English	MARRIED	6.95	K/uL	2.52	m/uL	5.52	K/uL	0.76	K/uL	167	K/uL	7.2	g/dL	18.1	%	23.7	%	4	g/dL	NULL	NULL	NULL	NULL	135.67	mEq/L	4.27	mEq/L	8.63	mg/dL	95	mEq/L	161.67	mg/dL	NULL	NULL	16.33	mEq/L	NULL	NULL	NULL	NULL	NULL	NULL
15460216	26257839	91	0	UNKNOWN	Medicare	English	WIDOWED	10	K/uL	3.81	m/uL	10.82	K/uL	0.53	K/uL	143.5	K/uL	10.45	g/dL	14.8	%	35.35	%	3.7	g/dL	NULL	NULL	NULL	NULL	146.67	mEq/L	3.9	mEq/L	8.9	mg/dL	107.67	mEq/L	126.33	mg/dL	NULL	NULL	12.67	mEq/L	7.26	units	75.6	mm Hg	139.2	mm Hg
15462466	25825016	54	1	WHITE	Medicare	English	SINGLE	8	K/uL	3.34	m/uL	5.01	K/uL	1.86	K/uL	116	K/uL	10.2	g/dL	13.4	%	31.9	%	3.4	g/dL	NULL	NULL	NULL	NULL	131	mEq/L	4	mEq/L	NULL	NULL	95	mEq/L	158	mg/dL	NULL	NULL	16	mEq/L	NULL	NULL	NULL	NULL	NULL	NULL
15470813	29556992	80	1	UNKNOWN	Medicare	English	NULL	6.15	K/uL	3.06	m/uL	NULL	NULL	NULL	NULL	123.5	K/uL	7.95	g/dL	17.15	%	25.9	%	2.8	g/dL	NULL	NULL	NULL	NULL	134.5	mEq/L	3.55	mEq/L	8	mg/dL	94	mEq/L	87.5	mg/dL	NULL	NULL	12.5	mEq/L	NULL	NULL	NULL	NULL	NULL	NULL
15491694	24075318	69	1	UNKNOWN	Medicare	English	NULL	8.9	K/uL	3.31	m/uL	NULL	NULL	NULL	NULL	283	K/uL	7.95	g/dL	16.1	%	25.4	%	NULL	NULL	NULL	NULL	NULL	NULL	139	mEq/L	4.6	mEq/L	8.8	mg/dL	107	mEq/L	144	mg/dL	NULL	NULL	10	mEq/L	7.32	units	47	mm Hg	245	mm Hg
15493050	22426224	55	1	WHITE	Private	English	MARRIED	NULL	NULL	NULL	NULL	NULL	NULL	NULL	NULL	NULL	NULL	NULL	NULL	NULL	NULL	NULL	NULL	NULL	NULL	NULL	NULL	NULL	NULL	NULL	NULL	NULL	NULL	NULL	NULL	NULL	NULL	NULL	NULL	NULL	NULL	NULL	NULL	NULL	NULL	NULL	NULL	NULL	NULL
15500697	28256859	77	1	WHITE	Medicare	English	MARRIED	7.8	K/uL	3.17	m/uL	NULL	NULL	NULL	NULL	167	K/uL	11.2	g/dL	12.2	%	32.6	%	3.2	g/dL	NULL	NULL	NULL	NULL	137.33	mEq/L	4.93	mEq/L	8.37	mg/dL	103.67	mEq/L	235	mg/dL	NULL	NULL	14.33	mEq/L	NULL	NULL	NULL	NULL	NULL	NULL
15510525	23600019	62	1	BLACK/AFRICAN AMERICAN	Medicare	English	NULL	4.4	K/uL	4.07	m/uL	NULL	NULL	NULL	NULL	278.5	K/uL	12.55	g/dL	13.2	%	37.25	%	NULL	NULL	NULL	NULL	NULL	NULL	135.5	mEq/L	3.95	mEq/L	9.2	mg/dL	103	mEq/L	92	mg/dL	5.6	%	11.5	mEq/L	NULL	NULL	NULL	NULL	NULL	NULL
15513200	22395803	84	0	WHITE	Medicare	English	SINGLE	6.3	K/uL	3.13	m/uL	5.24	K/uL	1	K/uL	161.5	K/uL	9.4	g/dL	13.9	%	30.55	%	NULL	NULL	NULL	NULL	NULL	NULL	145.5	mEq/L	4.55	mEq/L	8.6	mg/dL	101.5	mEq/L	132.5	mg/dL	NULL	NULL	11	mEq/L	NULL	NULL	NULL	NULL	NULL	NULL
15518310	22859270	64	1	UNKNOWN	Medicaid	English	NULL	7.05	K/uL	3.4	m/uL	3.13	K/uL	0.65	K/uL	116	K/uL	8.85	g/dL	26.05	%	28.8	%	3.1	g/dL	NULL	NULL	NULL	NULL	131.5	mEq/L	3.7	mEq/L	8.3	mg/dL	97	mEq/L	142.5	mg/dL	NULL	NULL	15.5	mEq/L	NULL	NULL	NULL	NULL	NULL	NULL
15523187	22675155	60	1	WHITE	Private	English	DIVORCED	6.85	K/uL	4.44	m/uL	NULL	NULL	NULL	NULL	168	K/uL	14.1	g/dL	13.1	%	42	%	NULL	NULL	NULL	NULL	NULL	NULL	139	mEq/L	3.5	mEq/L	9	mg/dL	102	mEq/L	106	mg/dL	NULL	NULL	20	mEq/L	NULL	NULL	NULL	NULL	NULL	NULL
15536070	27577598	80	0	WHITE	Medicare	English	WIDOWED	5.1	K/uL	3.14	m/uL	3.29	K/uL	0.89	K/uL	163	K/uL	11	g/dL	12.5	%	33	%	3.8	g/dL	3.1	g/dL	6.9	g/dL	138	mEq/L	4.2	mEq/L	NULL	NULL	98	mEq/L	106	mg/dL	5.3	%	20	mEq/L	NULL	NULL	NULL	NULL	NULL	NULL
15547974	21885434	79	1	WHITE	Medicare	English	SINGLE	NULL	NULL	NULL	NULL	NULL	NULL	NULL	NULL	NULL	NULL	NULL	NULL	NULL	NULL	NULL	NULL	NULL	NULL	NULL	NULL	NULL	NULL	134	mEq/L	4.4	mEq/L	NULL	NULL	93	mEq/L	155	mg/dL	NULL	NULL	9	mEq/L	NULL	NULL	NULL	NULL	NULL	NULL
15554295	27705504	46	1	HISPANIC/LATINO - PUERTO RICAN	Medicaid	Spanish	MARRIED	5.59	K/uL	3.26	m/uL	6.54	K/uL	1.98	K/uL	79	K/uL	9.46	g/dL	14.87	%	28.7	%	3	g/dL	NULL	NULL	NULL	NULL	140.6	mEq/L	3.92	mEq/L	8.36	mg/dL	108	mEq/L	128.2	mg/dL	NULL	NULL	16.2	mEq/L	7.37	units	34.13	mm Hg	108	mm Hg
15556013	20031962	49	0	WHITE	Medicare	English	DIVORCED	23.3	K/uL	3.67	m/uL	NULL	NULL	NULL	NULL	662	K/uL	9.8	g/dL	15.1	%	33.1	%	2.1	g/dL	NULL	NULL	NULL	NULL	134	mEq/L	4.2	mEq/L	14.4	mg/dL	96	mEq/L	214	mg/dL	NULL	NULL	17	mEq/L	NULL	NULL	NULL	NULL	NULL	NULL
15561719	28012221	78	0	WHITE	Medicare	English	DIVORCED	5	K/uL	2.83	m/uL	NULL	NULL	NULL	NULL	117	K/uL	8.4	g/dL	15.3	%	26	%	NULL	NULL	NULL	NULL	NULL	NULL	143	mEq/L	NULL	NULL	NULL	NULL	106	mEq/L	116	mg/dL	NULL	NULL	12	mEq/L	NULL	NULL	NULL	NULL	NULL	NULL
15566699	25451980	75	1	WHITE	Medicare	English	MARRIED	6	K/uL	3.84	m/uL	NULL	NULL	NULL	NULL	154	K/uL	11.6	g/dL	14.8	%	37.4	%	NULL	NULL	NULL	NULL	NULL	NULL	143	mEq/L	4.3	mEq/L	NULL	NULL	107	mEq/L	123	mg/dL	NULL	NULL	12	mEq/L	NULL	NULL	NULL	NULL	NULL	NULL
15573871	20194508	76	1	WHITE	Medicare	English	MARRIED	5.1	K/uL	2.6	m/uL	NULL	NULL	NULL	NULL	97.5	K/uL	8.6	g/dL	14.1	%	26.25	%	NULL	NULL	NULL	NULL	NULL	NULL	138	mEq/L	3.9	mEq/L	7.95	mg/dL	103.5	mEq/L	105	mg/dL	NULL	NULL	11	mEq/L	7.43	units	45	mm Hg	257	mm Hg
15577009	24864246	76	0	WHITE	Medicare	English	NULL	18.5	K/uL	3.2	m/uL	NULL	NULL	NULL	NULL	429	K/uL	9.6	g/dL	13.2	%	32	%	NULL	NULL	NULL	NULL	NULL	NULL	137	mEq/L	4.3	mEq/L	8.8	mg/dL	98	mEq/L	151	mg/dL	6.4	%	15	mEq/L	7.29	units	73.33	mm Hg	174.67	mm Hg
15585239	29942126	82	1	PATIENT DECLINED TO ANSWER	Medicare	English	MARRIED	6.2	K/uL	2.95	m/uL	NULL	NULL	NULL	NULL	235	K/uL	7.5	g/dL	17.3	%	24.3	%	NULL	NULL	NULL	NULL	NULL	NULL	140	mEq/L	4	mEq/L	8	mg/dL	103	mEq/L	170	mg/dL	NULL	NULL	18	mEq/L	NULL	NULL	NULL	NULL	NULL	NULL
15587198	24574896	82	1	UNKNOWN	Medicare	English	MARRIED	10.9	K/uL	3.01	m/uL	10.9	K/uL	1.21	K/uL	199	K/uL	7.37	g/dL	19.67	%	25.87	%	3.6	g/dL	NULL	NULL	NULL	NULL	131.33	mEq/L	4.53	mEq/L	8.2	mg/dL	95.83	mEq/L	154.17	mg/dL	NULL	NULL	18.67	mEq/L	7.37	units	41	mm Hg	114	mm Hg
15593351	28649799	71	0	WHITE	Medicare	English	MARRIED	10.83	K/uL	3.01	m/uL	9.74	K/uL	1.25	K/uL	164.33	K/uL	8.77	g/dL	19.73	%	28.93	%	NULL	NULL	NULL	NULL	NULL	NULL	135.33	mEq/L	4.2	mEq/L	8.17	mg/dL	91.33	mEq/L	245.33	mg/dL	NULL	NULL	16	mEq/L	7.46	units	42.5	mm Hg	122.5	mm Hg
15595192	23717410	84	0	WHITE	Medicare	English	MARRIED	NULL	NULL	NULL	NULL	NULL	NULL	NULL	NULL	NULL	NULL	NULL	NULL	NULL	NULL	NULL	NULL	NULL	NULL	NULL	NULL	NULL	NULL	NULL	NULL	NULL	NULL	NULL	NULL	NULL	NULL	NULL	NULL	NULL	NULL	NULL	NULL	NULL	NULL	NULL	NULL	NULL	NULL
15599728	21763600	60	0	OTHER	Medicaid	English	MARRIED	8.1	K/uL	6	m/uL	NULL	NULL	NULL	NULL	214	K/uL	17	g/dL	17.3	%	51.7	%	3	g/dL	NULL	NULL	NULL	NULL	143	mEq/L	4.1	mEq/L	8.9	mg/dL	109	mEq/L	137	mg/dL	NULL	NULL	11	mEq/L	NULL	NULL	NULL	NULL	NULL	NULL
15601374	27956015	71	0	WHITE	Medicare	English	SINGLE	NULL	NULL	NULL	NULL	NULL	NULL	NULL	NULL	NULL	NULL	NULL	NULL	NULL	NULL	NULL	NULL	NULL	NULL	NULL	NULL	NULL	NULL	NULL	NULL	NULL	NULL	NULL	NULL	NULL	NULL	NULL	NULL	NULL	NULL	NULL	NULL	NULL	NULL	NULL	NULL	NULL	NULL
15611471	28343498	82	1	WHITE	Medicare	English	MARRIED	25.43	K/uL	3.52	m/uL	20.86	K/uL	3.96	K/uL	168.75	K/uL	11.53	g/dL	12.95	%	32.13	%	NULL	NULL	NULL	NULL	NULL	NULL	139.5	mEq/L	3.7	mEq/L	8.1	mg/dL	111.33	mEq/L	185	mg/dL	NULL	NULL	7.67	mEq/L	7.37	units	38.14	mm Hg	278	mm Hg
15612570	26152435	63	0	WHITE	Medicaid	English	DIVORCED	13.17	K/uL	4.31	m/uL	NULL	NULL	NULL	NULL	140.33	K/uL	11.4	g/dL	17.93	%	37.93	%	NULL	NULL	NULL	NULL	NULL	NULL	137.67	mEq/L	4.63	mEq/L	8.3	mg/dL	102	mEq/L	314.67	mg/dL	NULL	NULL	13.67	mEq/L	7.35	units	46	mm Hg	64	mm Hg
15615024	24841495	64	1	WHITE	Private	English	MARRIED	8.95	K/uL	4.27	m/uL	NULL	NULL	NULL	NULL	166	K/uL	13.75	g/dL	13	%	39.7	%	NULL	NULL	NULL	NULL	NULL	NULL	135.5	mEq/L	4.05	mEq/L	8.6	mg/dL	104	mEq/L	213.5	mg/dL	NULL	NULL	14	mEq/L	NULL	NULL	NULL	NULL	NULL	NULL
15615924	26335545	56	0	BLACK/AFRICAN AMERICAN	Medicare	English	SINGLE	11.9	K/uL	3.16	m/uL	NULL	NULL	NULL	NULL	308	K/uL	8.7	g/dL	14.7	%	28	%	3.6	g/dL	NULL	NULL	NULL	NULL	138	mEq/L	4.1	mEq/L	9.8	mg/dL	100	mEq/L	184	mg/dL	NULL	NULL	14	mEq/L	NULL	NULL	NULL	NULL	NULL	NULL
15625149	20979945	66	0	UNKNOWN	Medicare	English	SINGLE	14.8	K/uL	3.51	m/uL	14.67	K/uL	0.81	K/uL	202	K/uL	9.83	g/dL	15.03	%	30.76	%	NULL	NULL	NULL	NULL	NULL	NULL	138.5	mEq/L	3.7	mEq/L	8.75	mg/dL	103.33	mEq/L	127	mg/dL	NULL	NULL	16	mEq/L	7.32	units	42.38	mm Hg	77.23	mm Hg
15628511	24990805	68	1	WHITE	Medicare	English	MARRIED	NULL	NULL	NULL	NULL	NULL	NULL	NULL	NULL	NULL	NULL	NULL	NULL	NULL	NULL	NULL	NULL	NULL	NULL	NULL	NULL	NULL	NULL	NULL	NULL	NULL	NULL	NULL	NULL	NULL	NULL	NULL	NULL	NULL	NULL	NULL	NULL	NULL	NULL	NULL	NULL	NULL	NULL
15630002	20247475	68	0	WHITE	Medicare	English	SINGLE	15.4	K/uL	5.54	m/uL	NULL	NULL	NULL	NULL	356	K/uL	16.2	g/dL	13.3	%	47.2	%	4.5	g/dL	NULL	NULL	NULL	NULL	135	mEq/L	4.4	mEq/L	10.7	mg/dL	99	mEq/L	166	mg/dL	8.1	%	15	mEq/L	NULL	NULL	NULL	NULL	NULL	NULL
15636250	21948565	59	0	WHITE	Private	English	MARRIED	11	K/uL	2.25	m/uL	9.01	K/uL	0.86	K/uL	410.5	K/uL	7.35	g/dL	21.1	%	21.25	%	3	g/dL	NULL	NULL	NULL	NULL	140	mEq/L	4.1	mEq/L	9	mg/dL	106	mEq/L	96	mg/dL	NULL	NULL	16	mEq/L	NULL	NULL	NULL	NULL	NULL	NULL
15638959	24064103	57	0	WHITE	Medicaid	English	DIVORCED	NULL	NULL	NULL	NULL	NULL	NULL	NULL	NULL	NULL	NULL	NULL	NULL	NULL	NULL	NULL	NULL	NULL	NULL	NULL	NULL	NULL	NULL	NULL	NULL	NULL	NULL	NULL	NULL	NULL	NULL	NULL	NULL	NULL	NULL	NULL	NULL	NULL	NULL	NULL	NULL	NULL	NULL
15639474	28205164	51	0	WHITE	Medicare	English	DIVORCED	13.8	K/uL	3.51	m/uL	NULL	NULL	NULL	NULL	239	K/uL	11.2	g/dL	14.6	%	33.3	%	NULL	NULL	NULL	NULL	NULL	NULL	144	mEq/L	3.6	mEq/L	9.1	mg/dL	108	mEq/L	113	mg/dL	NULL	NULL	10	mEq/L	NULL	NULL	NULL	NULL	NULL	NULL
15642021	26234857	72	0	UNKNOWN	Medicare	English	NULL	12.95	K/uL	5.69	m/uL	NULL	NULL	NULL	NULL	165.5	K/uL	14.45	g/dL	21.7	%	47.55	%	NULL	NULL	NULL	NULL	NULL	NULL	142.5	mEq/L	4.05	mEq/L	8.3	mg/dL	99	mEq/L	159.5	mg/dL	NULL	NULL	14	mEq/L	7.47	units	43	mm Hg	104	mm Hg
15642594	29379012	62	1	WHITE	Medicare	English	MARRIED	10.2	K/uL	5.43	m/uL	NULL	NULL	NULL	NULL	165	K/uL	16.7	g/dL	14.35	%	49.8	%	3	g/dL	NULL	NULL	NULL	NULL	138	mEq/L	4.1	mEq/L	7.95	mg/dL	102	mEq/L	122	mg/dL	7.3	%	12.5	mEq/L	7.3	units	50	mm Hg	212.17	mm Hg
15642846	23447476	75	1	WHITE	Medicare	English	MARRIED	18.4	K/uL	3.78	m/uL	NULL	NULL	NULL	NULL	198	K/uL	12.3	g/dL	13.5	%	38.2	%	NULL	NULL	NULL	NULL	NULL	NULL	136	mEq/L	7.1	mEq/L	8.5	mg/dL	106	mEq/L	198	mg/dL	NULL	NULL	10	mEq/L	7.23	units	59.8	mm Hg	215.4	mm Hg
15643034	23947160	70	1	UNABLE TO OBTAIN	Private	English	MARRIED	NULL	NULL	NULL	NULL	NULL	NULL	NULL	NULL	NULL	NULL	NULL	NULL	NULL	NULL	NULL	NULL	NULL	NULL	NULL	NULL	NULL	NULL	NULL	NULL	NULL	NULL	NULL	NULL	NULL	NULL	NULL	NULL	NULL	NULL	NULL	NULL	NULL	NULL	NULL	NULL	NULL	NULL
15643963	28097464	71	1	WHITE	Medicare	English	MARRIED	8.2	K/uL	3.72	m/uL	NULL	NULL	NULL	NULL	176	K/uL	10.9	g/dL	14.1	%	34.4	%	NULL	NULL	NULL	NULL	NULL	NULL	139	mEq/L	5.23	mEq/L	9.53	mg/dL	102	mEq/L	185.67	mg/dL	NULL	NULL	15	mEq/L	NULL	NULL	NULL	NULL	NULL	NULL
15644190	26335602	62	0	WHITE	Medicaid	English	DIVORCED	NULL	NULL	NULL	NULL	NULL	NULL	NULL	NULL	NULL	NULL	NULL	NULL	NULL	NULL	NULL	NULL	NULL	NULL	NULL	NULL	NULL	NULL	NULL	NULL	NULL	NULL	NULL	NULL	NULL	NULL	NULL	NULL	NULL	NULL	NULL	NULL	NULL	NULL	NULL	NULL	NULL	NULL
15647475	26144244	66	1	WHITE - OTHER EUROPEAN	Medicaid	Armenian	MARRIED	12.2	K/uL	3.71	m/uL	NULL	NULL	NULL	NULL	293	K/uL	10.3	g/dL	15.2	%	32.1	%	NULL	NULL	NULL	NULL	NULL	NULL	134	mEq/L	5.7	mEq/L	8.5	mg/dL	98	mEq/L	184	mg/dL	NULL	NULL	16	mEq/L	NULL	NULL	NULL	NULL	NULL	NULL
15647735	27013915	85	1	WHITE	Medicare	English	MARRIED	17.44	K/uL	4.14	m/uL	15.81	K/uL	1.22	K/uL	223.6	K/uL	12.5	g/dL	13.54	%	37.92	%	NULL	NULL	NULL	NULL	NULL	NULL	134.5	mEq/L	4.25	mEq/L	8	mg/dL	95.75	mEq/L	212.75	mg/dL	7.8	%	14	mEq/L	NULL	NULL	NULL	NULL	NULL	NULL
15650692	20960491	87	0	WHITE	Medicare	Italian	SINGLE	NULL	NULL	NULL	NULL	NULL	NULL	NULL	NULL	NULL	NULL	NULL	NULL	NULL	NULL	NULL	NULL	NULL	NULL	NULL	NULL	NULL	NULL	NULL	NULL	NULL	NULL	NULL	NULL	NULL	NULL	NULL	NULL	NULL	NULL	NULL	NULL	NULL	NULL	NULL	NULL	NULL	NULL
15667018	28769976	63	0	WHITE	Medicaid	English	SINGLE	8.7	K/uL	2.83	m/uL	6.54	K/uL	0.88	K/uL	305	K/uL	8.5	g/dL	11.7	%	25.4	%	NULL	NULL	NULL	NULL	NULL	NULL	138	mEq/L	3.6	mEq/L	8.1	mg/dL	98	mEq/L	108	mg/dL	NULL	NULL	13	mEq/L	NULL	NULL	NULL	NULL	NULL	NULL
15669659	23556140	86	0	WHITE	Medicare	English	WIDOWED	5.7	K/uL	4.76	m/uL	NULL	NULL	NULL	NULL	212	K/uL	13.9	g/dL	14.6	%	44.1	%	NULL	NULL	NULL	NULL	NULL	NULL	138	mEq/L	3.8	mEq/L	9	mg/dL	103	mEq/L	126	mg/dL	5.8	%	13	mEq/L	NULL	NULL	NULL	NULL	NULL	NULL
15677979	21999128	86	1	WHITE	Medicare	English	MARRIED	1.4	K/uL	3.97	m/uL	0.06	K/uL	1.01	K/uL	120	K/uL	12.3	g/dL	13.9	%	35.8	%	NULL	NULL	NULL	NULL	NULL	NULL	134	mEq/L	4.2	mEq/L	7.9	mg/dL	96	mEq/L	96	mg/dL	NULL	NULL	18	mEq/L	NULL	NULL	NULL	NULL	NULL	NULL
15681971	26936849	77	0	WHITE	Medicare	English	MARRIED	NULL	NULL	NULL	NULL	NULL	NULL	NULL	NULL	NULL	NULL	NULL	NULL	NULL	NULL	NULL	NULL	NULL	NULL	NULL	NULL	NULL	NULL	NULL	NULL	NULL	NULL	NULL	NULL	NULL	NULL	NULL	NULL	NULL	NULL	NULL	NULL	NULL	NULL	NULL	NULL	NULL	NULL
15683093	27940770	81	0	UNKNOWN	Medicare	English	WIDOWED	15.75	K/uL	3.26	m/uL	12.26	K/uL	1.52	K/uL	153	K/uL	7.73	g/dL	18.2	%	26.83	%	NULL	NULL	NULL	NULL	NULL	NULL	139.33	mEq/L	4.17	mEq/L	8.4	mg/dL	100	mEq/L	183.33	mg/dL	NULL	NULL	15.33	mEq/L	7.43	units	41	mm Hg	78	mm Hg
15686458	24119602	69	0	WHITE	Medicare	English	MARRIED	5.5	K/uL	2.42	m/uL	NULL	NULL	NULL	NULL	137	K/uL	7.5	g/dL	13.5	%	22.4	%	NULL	NULL	NULL	NULL	NULL	NULL	128.5	mEq/L	3.9	mEq/L	8.4	mg/dL	92.5	mEq/L	512	mg/dL	NULL	NULL	16	mEq/L	NULL	NULL	NULL	NULL	NULL	NULL
15686619	24919298	51	0	WHITE	Medicaid	English	SINGLE	NULL	NULL	NULL	NULL	NULL	NULL	NULL	NULL	NULL	NULL	NULL	NULL	NULL	NULL	NULL	NULL	NULL	NULL	NULL	NULL	NULL	NULL	NULL	NULL	NULL	NULL	NULL	NULL	NULL	NULL	NULL	NULL	NULL	NULL	NULL	NULL	NULL	NULL	NULL	NULL	NULL	NULL
15689336	25328908	85	1	WHITE	Medicare	English	WIDOWED	NULL	NULL	NULL	NULL	NULL	NULL	NULL	NULL	NULL	NULL	NULL	NULL	NULL	NULL	NULL	NULL	NULL	NULL	NULL	NULL	NULL	NULL	NULL	NULL	NULL	NULL	NULL	NULL	NULL	NULL	NULL	NULL	NULL	NULL	NULL	NULL	NULL	NULL	NULL	NULL	NULL	NULL
15692563	25417299	59	0	WHITE	Medicaid	English	SINGLE	NULL	NULL	NULL	NULL	NULL	NULL	NULL	NULL	NULL	NULL	NULL	NULL	NULL	NULL	NULL	NULL	NULL	NULL	NULL	NULL	NULL	NULL	NULL	NULL	NULL	NULL	NULL	NULL	NULL	NULL	NULL	NULL	NULL	NULL	NULL	NULL	NULL	NULL	NULL	NULL	NULL	NULL
15693621	23909071	56	0	WHITE	Private	English	MARRIED	12.9	K/uL	2.95	m/uL	10.99	K/uL	0.78	K/uL	241	K/uL	7.3	g/dL	19.3	%	25.6	%	2.7	g/dL	NULL	NULL	NULL	NULL	140	mEq/L	4.3	mEq/L	7.8	mg/dL	101	mEq/L	219	mg/dL	NULL	NULL	18	mEq/L	7.4	units	52	mm Hg	53.5	mm Hg
15701623	23325660	66	1	WHITE	Medicare	English	WIDOWED	11.45	K/uL	3	m/uL	8.94	K/uL	2.12	K/uL	153.5	K/uL	9.45	g/dL	13.85	%	28.13	%	NULL	NULL	NULL	NULL	NULL	NULL	NULL	NULL	4.3	mEq/L	NULL	NULL	115	mEq/L	NULL	NULL	NULL	NULL	5	mEq/L	7.28	units	42.73	mm Hg	184.45	mm Hg
15703253	20363471	72	0	WHITE	Medicare	English	MARRIED	11.2	K/uL	4.26	m/uL	NULL	NULL	NULL	NULL	277	K/uL	12.1	g/dL	14.2	%	38.2	%	NULL	NULL	NULL	NULL	NULL	NULL	140.5	mEq/L	3.9	mEq/L	9.1	mg/dL	103	mEq/L	194.5	mg/dL	6.4	%	13	mEq/L	NULL	NULL	NULL	NULL	NULL	NULL
15708034	29839714	59	0	WHITE	Medicaid	English	SINGLE	NULL	NULL	NULL	NULL	NULL	NULL	NULL	NULL	NULL	NULL	NULL	NULL	NULL	NULL	NULL	NULL	NULL	NULL	NULL	NULL	NULL	NULL	NULL	NULL	NULL	NULL	NULL	NULL	NULL	NULL	NULL	NULL	NULL	NULL	NULL	NULL	NULL	NULL	NULL	NULL	NULL	NULL
15716712	25363622	78	1	WHITE	Medicare	English	MARRIED	6.4	K/uL	4.69	m/uL	NULL	NULL	NULL	NULL	167	K/uL	14.9	g/dL	16	%	46.9	%	NULL	NULL	NULL	NULL	NULL	NULL	140	mEq/L	4.2	mEq/L	NULL	NULL	100	mEq/L	103	mg/dL	NULL	NULL	16	mEq/L	NULL	NULL	NULL	NULL	NULL	NULL
15717636	28220557	82	1	WHITE - EASTERN EUROPEAN	Medicare	English	NULL	19.07	K/uL	3.31	m/uL	NULL	NULL	NULL	NULL	268.33	K/uL	7.57	g/dL	17.97	%	26.1	%	NULL	NULL	NULL	NULL	NULL	NULL	145	mEq/L	4.7	mEq/L	7.75	mg/dL	107.33	mEq/L	175.67	mg/dL	NULL	NULL	17.33	mEq/L	7.32	units	46.67	mm Hg	99.67	mm Hg
15717701	29793771	66	0	WHITE	Medicare	English	DIVORCED	8.6	K/uL	3.18	m/uL	NULL	NULL	NULL	NULL	125	K/uL	10	g/dL	13.4	%	31.3	%	NULL	NULL	NULL	NULL	NULL	NULL	139	mEq/L	3.8	mEq/L	8.5	mg/dL	102	mEq/L	93	mg/dL	NULL	NULL	12	mEq/L	7.34	units	51	mm Hg	506	mm Hg
15720901	21273381	69	1	WHITE	Medicare	English	MARRIED	22.37	K/uL	4.54	m/uL	NULL	NULL	NULL	NULL	409.67	K/uL	13.5	g/dL	15.07	%	41.47	%	3.2	g/dL	NULL	NULL	NULL	NULL	136	mEq/L	4.53	mEq/L	8.53	mg/dL	96.67	mEq/L	142.67	mg/dL	NULL	NULL	14	mEq/L	NULL	NULL	NULL	NULL	NULL	NULL
15725489	22612393	75	1	OTHER	Medicare	Vietnamese	SINGLE	7.1	K/uL	4.69	m/uL	NULL	NULL	NULL	NULL	139	K/uL	11.5	g/dL	20	%	37.8	%	3.5	g/dL	NULL	NULL	NULL	NULL	137	mEq/L	3.2	mEq/L	8.7	mg/dL	95	mEq/L	125	mg/dL	NULL	NULL	18	mEq/L	NULL	NULL	NULL	NULL	NULL	NULL
15726291	26811738	82	1	WHITE	Medicare	English	WIDOWED	7.6	K/uL	3.53	m/uL	5.17	K/uL	0.93	K/uL	207	K/uL	10.8	g/dL	15.9	%	32.8	%	NULL	NULL	NULL	NULL	NULL	NULL	138	mEq/L	3.8	mEq/L	8.9	mg/dL	95.5	mEq/L	219	mg/dL	NULL	NULL	16.5	mEq/L	7.38	units	NULL	NULL	NULL	NULL
15730635	28069578	75	1	UNKNOWN	Medicare	English	NULL	9.73	K/uL	2.58	m/uL	8.42	K/uL	0.99	K/uL	132.67	K/uL	7.33	g/dL	14.4	%	23.1	%	2.4	g/dL	NULL	NULL	NULL	NULL	140.33	mEq/L	3.3	mEq/L	7.45	mg/dL	105.33	mEq/L	231.67	mg/dL	NULL	NULL	14	mEq/L	7.42	units	45	mm Hg	72.13	mm Hg
15730728	24813485	82	0	WHITE	Medicare	English	MARRIED	9.6	K/uL	4.77	m/uL	NULL	NULL	NULL	NULL	247.5	K/uL	13.45	g/dL	15.1	%	41.25	%	NULL	NULL	NULL	NULL	NULL	NULL	131	mEq/L	4.3	mEq/L	9.3	mg/dL	94	mEq/L	106	mg/dL	NULL	NULL	13	mEq/L	NULL	NULL	NULL	NULL	NULL	NULL
15738006	23896885	60	1	UNKNOWN	Private	English	NULL	10.05	K/uL	4.14	m/uL	7.22	K/uL	1	K/uL	355	K/uL	8.6	g/dL	20.5	%	29.35	%	2.6	g/dL	NULL	NULL	NULL	NULL	135	mEq/L	5.05	mEq/L	7.45	mg/dL	99	mEq/L	123.5	mg/dL	NULL	NULL	15	mEq/L	7.32	units	48.33	mm Hg	95.67	mm Hg
15741496	25906108	59	1	WHITE	Medicaid	English	SINGLE	21.3	K/uL	4.66	m/uL	NULL	NULL	NULL	NULL	330.5	K/uL	12.7	g/dL	15.05	%	41.5	%	NULL	NULL	NULL	NULL	NULL	NULL	136.5	mEq/L	5.4	mEq/L	9	mg/dL	96.5	mEq/L	422	mg/dL	NULL	NULL	15	mEq/L	7.33	units	57.33	mm Hg	50	mm Hg
15746216	26221260	67	0	WHITE	Medicare	English	SINGLE	9.2	K/uL	3.73	m/uL	NULL	NULL	NULL	NULL	251	K/uL	10.9	g/dL	16.9	%	34.9	%	3.7	g/dL	NULL	NULL	NULL	NULL	137	mEq/L	3.6	mEq/L	NULL	NULL	96	mEq/L	168	mg/dL	5.9	%	14	mEq/L	NULL	NULL	NULL	NULL	NULL	NULL
15750192	22745160	84	0	WHITE	Medicare	English	MARRIED	7.5	K/uL	4.05	m/uL	NULL	NULL	NULL	NULL	140	K/uL	12	g/dL	13.9	%	35.7	%	NULL	NULL	NULL	NULL	NULL	NULL	142	mEq/L	4.4	mEq/L	9.6	mg/dL	105	mEq/L	128	mg/dL	NULL	NULL	15	mEq/L	NULL	NULL	NULL	NULL	NULL	NULL
15752385	26855991	74	0	UNKNOWN	Medicare	English	NULL	11.6	K/uL	2.86	m/uL	NULL	NULL	NULL	NULL	280.5	K/uL	8.45	g/dL	15.35	%	26.35	%	NULL	NULL	NULL	NULL	NULL	NULL	142	mEq/L	3.73	mEq/L	8.7	mg/dL	91.33	mEq/L	191.67	mg/dL	NULL	NULL	14.33	mEq/L	NULL	NULL	NULL	NULL	NULL	NULL
15761326	24039533	75	1	WHITE	Medicare	English	MARRIED	7.7	K/uL	4.58	m/uL	NULL	NULL	NULL	NULL	296	K/uL	12.1	g/dL	15.8	%	38.5	%	4.1	g/dL	NULL	NULL	NULL	NULL	140	mEq/L	4.7	mEq/L	9.4	mg/dL	104	mEq/L	250	mg/dL	8.6	%	12	mEq/L	NULL	NULL	NULL	NULL	NULL	NULL
15788406	24714992	75	0	WHITE	Medicare	English	SINGLE	4.5	K/uL	4.08	m/uL	NULL	NULL	NULL	NULL	146	K/uL	11.3	g/dL	15.3	%	37.5	%	NULL	NULL	NULL	NULL	NULL	NULL	139	mEq/L	4.2	mEq/L	8.5	mg/dL	99	mEq/L	88	mg/dL	NULL	NULL	17	mEq/L	NULL	NULL	NULL	NULL	NULL	NULL
15796214	22111741	79	0	WHITE	Medicare	English	NULL	12.5	K/uL	4.3	m/uL	NULL	NULL	NULL	NULL	214	K/uL	12.7	g/dL	14.8	%	37.8	%	3.9	g/dL	NULL	NULL	NULL	NULL	140	mEq/L	4.5	mEq/L	8.5	mg/dL	106	mEq/L	282	mg/dL	NULL	NULL	12	mEq/L	7.32	units	46.33	mm Hg	42	mm Hg
15800573	22263199	64	1	WHITE	Medicare	English	MARRIED	6	K/uL	3.04	m/uL	4.42	K/uL	1.92	K/uL	211	K/uL	9.57	g/dL	15.37	%	29.9	%	NULL	NULL	NULL	NULL	NULL	NULL	137.33	mEq/L	3.87	mEq/L	8.9	mg/dL	100.33	mEq/L	153.67	mg/dL	NULL	NULL	11.67	mEq/L	NULL	NULL	NULL	NULL	NULL	NULL
15802366	29126724	71	1	OTHER	Medicare	English	MARRIED	5.75	K/uL	3.14	m/uL	NULL	NULL	NULL	NULL	47.5	K/uL	8.25	g/dL	20.3	%	27.15	%	3.2	g/dL	4	g/dL	6.9	g/dL	138.6	mEq/L	4.92	mEq/L	8.58	mg/dL	95.4	mEq/L	298.2	mg/dL	7.1	%	14.8	mEq/L	7.37	units	60	mm Hg	60.5	mm Hg
15809076	24668172	69	0	WHITE	Medicare	English	WIDOWED	13.7	K/uL	2.65	m/uL	8.66	K/uL	2.51	K/uL	103.5	K/uL	8.55	g/dL	12.95	%	25.87	%	NULL	NULL	NULL	NULL	NULL	NULL	140	mEq/L	4.4	mEq/L	8.4	mg/dL	106.5	mEq/L	162	mg/dL	NULL	NULL	17.5	mEq/L	7.35	units	38.89	mm Hg	208.11	mm Hg
15811312	28853978	64	0	WHITE	Private	English	SINGLE	6.5	K/uL	4.31	m/uL	NULL	NULL	NULL	NULL	238	K/uL	11	g/dL	17.2	%	36.6	%	NULL	NULL	NULL	NULL	NULL	NULL	140	mEq/L	3.6	mEq/L	9	mg/dL	101	mEq/L	93	mg/dL	NULL	NULL	14	mEq/L	NULL	NULL	NULL	NULL	NULL	NULL
15811429	22460079	61	1	WHITE	Medicare	English	SINGLE	14	K/uL	4.79	m/uL	10.91	K/uL	0.26	K/uL	293	K/uL	13.5	g/dL	16.9	%	42.25	%	NULL	NULL	NULL	NULL	NULL	NULL	137	mEq/L	5.1	mEq/L	9.1	mg/dL	98	mEq/L	301	mg/dL	NULL	NULL	11	mEq/L	NULL	NULL	NULL	NULL	NULL	NULL
15818680	26974271	91	1	WHITE	Medicare	English	MARRIED	7.9	K/uL	3.08	m/uL	5.97	K/uL	1	K/uL	271	K/uL	9.6	g/dL	14.6	%	29.1	%	3.3	g/dL	NULL	NULL	NULL	NULL	135	mEq/L	4.3	mEq/L	9.1	mg/dL	97	mEq/L	303	mg/dL	9.45	%	13	mEq/L	NULL	NULL	NULL	NULL	NULL	NULL
15826221	29095068	61	0	WHITE	Medicare	English	WIDOWED	13.9	K/uL	3.61	m/uL	NULL	NULL	NULL	NULL	410	K/uL	10.1	g/dL	12.9	%	32.2	%	NULL	NULL	NULL	NULL	NULL	NULL	136	mEq/L	4.2	mEq/L	9.2	mg/dL	95	mEq/L	172	mg/dL	NULL	NULL	11	mEq/L	NULL	NULL	NULL	NULL	NULL	NULL
15827949	25289556	66	0	WHITE	Medicare	English	MARRIED	3.8	K/uL	4.01	m/uL	NULL	NULL	NULL	NULL	196	K/uL	8.5	g/dL	19.3	%	30.9	%	NULL	NULL	NULL	NULL	NULL	NULL	134	mEq/L	4.1	mEq/L	8.6	mg/dL	97	mEq/L	289	mg/dL	NULL	NULL	10	mEq/L	NULL	NULL	NULL	NULL	NULL	NULL
15844941	21402218	65	1	WHITE	Private	English	MARRIED	6	K/uL	1.84	m/uL	2.5	K/uL	1.73	K/uL	54.5	K/uL	6.45	g/dL	17.2	%	19.55	%	3.1	g/dL	NULL	NULL	NULL	NULL	134	mEq/L	4.6	mEq/L	8.85	mg/dL	102	mEq/L	211	mg/dL	NULL	NULL	12	mEq/L	NULL	NULL	NULL	NULL	NULL	NULL
15845398	26712426	82	1	WHITE	Medicare	English	MARRIED	6.4	K/uL	2.58	m/uL	NULL	NULL	NULL	NULL	237	K/uL	8.1	g/dL	14.07	%	25.97	%	NULL	NULL	NULL	NULL	NULL	NULL	146	mEq/L	4.3	mEq/L	8.8	mg/dL	109	mEq/L	105	mg/dL	NULL	NULL	16	mEq/L	NULL	NULL	NULL	NULL	NULL	NULL
15862504	20943720	79	1	UNKNOWN	Medicare	English	NULL	9.4	K/uL	3.06	m/uL	NULL	NULL	NULL	NULL	189	K/uL	9.7	g/dL	13.4	%	30.8	%	NULL	NULL	NULL	NULL	NULL	NULL	138	mEq/L	4.8	mEq/L	7.9	mg/dL	100	mEq/L	114	mg/dL	NULL	NULL	16	mEq/L	NULL	NULL	NULL	NULL	NULL	NULL
15867642	22406405	68	1	UNKNOWN	Medicare	English	NULL	9.55	K/uL	3.41	m/uL	NULL	NULL	NULL	NULL	232	K/uL	9.35	g/dL	18.1	%	31.25	%	NULL	NULL	NULL	NULL	NULL	NULL	133.5	mEq/L	4.05	mEq/L	8.95	mg/dL	93	mEq/L	159	mg/dL	6.7	%	16.5	mEq/L	7.36	units	48	mm Hg	36	mm Hg
15869746	23882195	70	0	BLACK/AFRICAN AMERICAN	Medicare	English	MARRIED	20.5	K/uL	3.49	m/uL	NULL	NULL	NULL	NULL	190	K/uL	9.6	g/dL	13.8	%	31.3	%	NULL	NULL	NULL	NULL	NULL	NULL	141	mEq/L	5	mEq/L	8.4	mg/dL	104	mEq/L	226	mg/dL	NULL	NULL	13	mEq/L	NULL	NULL	NULL	NULL	NULL	NULL
15870281	22455424	82	0	WHITE	Medicare	English	SINGLE	11.5	K/uL	3.33	m/uL	NULL	NULL	NULL	NULL	132	K/uL	10.2	g/dL	11.5	%	32.2	%	NULL	NULL	NULL	NULL	NULL	NULL	142	mEq/L	4.4	mEq/L	8.9	mg/dL	107	mEq/L	172	mg/dL	NULL	NULL	13	mEq/L	NULL	NULL	NULL	NULL	NULL	NULL
15872737	21656220	88	0	WHITE	Medicare	English	WIDOWED	6.75	K/uL	3.57	m/uL	5.47	K/uL	1.53	K/uL	110.5	K/uL	12.5	g/dL	14.55	%	38.25	%	4.4	g/dL	NULL	NULL	NULL	NULL	141	mEq/L	4.2	mEq/L	8.9	mg/dL	102	mEq/L	231.5	mg/dL	NULL	NULL	12.5	mEq/L	NULL	NULL	NULL	NULL	NULL	NULL
15874883	26708280	60	0	WHITE	Medicare	English	DIVORCED	NULL	NULL	NULL	NULL	NULL	NULL	NULL	NULL	NULL	NULL	NULL	NULL	NULL	NULL	NULL	NULL	NULL	NULL	NULL	NULL	NULL	NULL	NULL	NULL	NULL	NULL	NULL	NULL	NULL	NULL	NULL	NULL	NULL	NULL	NULL	NULL	NULL	NULL	NULL	NULL	NULL	NULL
15879458	24799647	76	1	WHITE	Medicare	English	WIDOWED	21.03	K/uL	3.68	m/uL	19.15	K/uL	0.49	K/uL	256	K/uL	9.57	g/dL	17.43	%	31.37	%	NULL	NULL	NULL	NULL	NULL	NULL	140	mEq/L	4.3	mEq/L	7.65	mg/dL	106	mEq/L	153.5	mg/dL	NULL	NULL	10	mEq/L	7.33	units	49.8	mm Hg	141.8	mm Hg
15883934	29372560	58	1	AMERICAN INDIAN/ALASKA NATIVE	Medicare	English	SINGLE	9.9	K/uL	3.16	m/uL	NULL	NULL	NULL	NULL	191	K/uL	9.3	g/dL	14.4	%	29.1	%	NULL	NULL	NULL	NULL	NULL	NULL	139	mEq/L	4.4	mEq/L	8	mg/dL	108	mEq/L	129	mg/dL	6.9	%	9	mEq/L	NULL	NULL	NULL	NULL	NULL	NULL
15917508	21026520	57	0	WHITE	Private	English	MARRIED	11.2	K/uL	3.67	m/uL	NULL	NULL	NULL	NULL	626	K/uL	8.2	g/dL	16.3	%	26.5	%	NULL	NULL	NULL	NULL	NULL	NULL	130.5	mEq/L	5.05	mEq/L	9	mg/dL	99	mEq/L	383.5	mg/dL	NULL	NULL	8.5	mEq/L	NULL	NULL	NULL	NULL	NULL	NULL
15920093	26328006	80	1	WHITE	Medicare	English	SINGLE	11.6	K/uL	4.23	m/uL	NULL	NULL	NULL	NULL	208	K/uL	13	g/dL	14	%	39.7	%	NULL	NULL	NULL	NULL	NULL	NULL	138	mEq/L	4.3	mEq/L	NULL	NULL	102	mEq/L	112	mg/dL	NULL	NULL	12	mEq/L	NULL	NULL	NULL	NULL	NULL	NULL
15922024	20054148	61	0	WHITE	Medicare	English	SINGLE	NULL	NULL	NULL	NULL	NULL	NULL	NULL	NULL	NULL	NULL	NULL	NULL	NULL	NULL	NULL	NULL	NULL	NULL	NULL	NULL	NULL	NULL	NULL	NULL	NULL	NULL	NULL	NULL	NULL	NULL	NULL	NULL	NULL	NULL	NULL	NULL	NULL	NULL	NULL	NULL	NULL	NULL
15947313	22509003	51	0	WHITE	Medicaid	English	SINGLE	27	K/uL	2.2	m/uL	NULL	NULL	NULL	NULL	308	K/uL	6.4	g/dL	16.2	%	19	%	NULL	NULL	NULL	NULL	NULL	NULL	139	mEq/L	4.1	mEq/L	7.2	mg/dL	108	mEq/L	187	mg/dL	NULL	NULL	15	mEq/L	NULL	NULL	NULL	NULL	NULL	NULL
15951813	24198118	66	1	UNKNOWN	Medicare	English	MARRIED	7.8	K/uL	4.57	m/uL	6.95	K/uL	0.5	K/uL	178	K/uL	12.8	g/dL	14.25	%	42.05	%	NULL	NULL	NULL	NULL	NULL	NULL	133	mEq/L	3.9	mEq/L	8.35	mg/dL	89.5	mEq/L	179	mg/dL	NULL	NULL	15	mEq/L	7.31	units	78.5	mm Hg	59	mm Hg
15952911	20555614	63	1	OTHER	Private	English	MARRIED	5.85	K/uL	4.47	m/uL	NULL	NULL	NULL	NULL	163.5	K/uL	12.55	g/dL	13.95	%	37.75	%	3.9	g/dL	NULL	NULL	NULL	NULL	139.5	mEq/L	4	mEq/L	9.5	mg/dL	99	mEq/L	151.5	mg/dL	7.2	%	15.5	mEq/L	NULL	NULL	NULL	NULL	NULL	NULL
15956199	25028793	64	0	BLACK/AFRICAN AMERICAN	Medicare	English	SINGLE	6.1	K/uL	4.34	m/uL	3.83	K/uL	1.16	K/uL	131	K/uL	12.3	g/dL	16.4	%	38.15	%	3.3	g/dL	NULL	NULL	NULL	NULL	141.33	mEq/L	3.83	mEq/L	9.4	mg/dL	101	mEq/L	111.67	mg/dL	NULL	NULL	15.67	mEq/L	NULL	NULL	NULL	NULL	NULL	NULL
15962640	28160022	76	1	WHITE	Medicare	English	SINGLE	13	K/uL	4.19	m/uL	NULL	NULL	NULL	NULL	197	K/uL	10.7	g/dL	17.9	%	36.3	%	3.1	g/dL	NULL	NULL	NULL	NULL	130	mEq/L	5.6	mEq/L	8.8	mg/dL	97	mEq/L	127	mg/dL	NULL	NULL	NULL	NULL	NULL	NULL	NULL	NULL	NULL	NULL
15969213	23715380	69	0	WHITE	Medicaid	English	MARRIED	15.75	K/uL	4.32	m/uL	13.36	K/uL	0.83	K/uL	414	K/uL	9.1	g/dL	18.5	%	34.25	%	2.9	g/dL	NULL	NULL	NULL	NULL	142	mEq/L	4.15	mEq/L	8.7	mg/dL	97	mEq/L	194	mg/dL	NULL	NULL	12	mEq/L	NULL	NULL	NULL	NULL	NULL	NULL
15974615	21212325	86	0	WHITE	Medicare	English	WIDOWED	19	K/uL	3.22	m/uL	NULL	NULL	NULL	NULL	190	K/uL	9.3	g/dL	16.2	%	32.4	%	NULL	NULL	NULL	NULL	NULL	NULL	146.5	mEq/L	5.45	mEq/L	9.05	mg/dL	105.5	mEq/L	119.5	mg/dL	NULL	NULL	13.5	mEq/L	7.34	units	57.5	mm Hg	105	mm Hg
15980424	26628419	83	0	WHITE	Medicare	English	DIVORCED	12.8	K/uL	3.41	m/uL	NULL	NULL	NULL	NULL	171	K/uL	10.4	g/dL	13.1	%	31	%	NULL	NULL	NULL	NULL	NULL	NULL	132	mEq/L	3.2	mEq/L	8.6	mg/dL	97	mEq/L	106	mg/dL	NULL	NULL	13	mEq/L	NULL	NULL	NULL	NULL	NULL	NULL
15982790	21243842	70	1	UNKNOWN	Medicare	English	NULL	10.7	K/uL	3.91	m/uL	NULL	NULL	NULL	NULL	422.5	K/uL	10.45	g/dL	19.15	%	32.45	%	NULL	NULL	NULL	NULL	NULL	NULL	139	mEq/L	4.4	mEq/L	9.05	mg/dL	102	mEq/L	116.5	mg/dL	NULL	NULL	12	mEq/L	NULL	NULL	NULL	NULL	NULL	NULL
15991399	26285672	83	1	UNKNOWN	Medicare	English	MARRIED	15.53	K/uL	4.04	m/uL	10.31	K/uL	0.86	K/uL	279	K/uL	12.83	g/dL	12.5	%	36.8	%	4.3	g/dL	NULL	NULL	NULL	NULL	130.33	mEq/L	4.9	mEq/L	8.2	mg/dL	96	mEq/L	150.33	mg/dL	NULL	NULL	17	mEq/L	7.3	units	45	mm Hg	100	mm Hg
15997812	29241215	59	1	UNKNOWN	Medicaid	English	NULL	13.1	K/uL	2.78	m/uL	NULL	NULL	NULL	NULL	144.33	K/uL	7.43	g/dL	18.93	%	25.37	%	NULL	NULL	NULL	NULL	NULL	NULL	151.67	mEq/L	4.23	mEq/L	9	mg/dL	112.67	mEq/L	172.33	mg/dL	6.8	%	7.33	mEq/L	7.36	units	60	mm Hg	30	mm Hg
16002278	25146981	78	1	WHITE	Medicare	English	MARRIED	NULL	NULL	NULL	NULL	NULL	NULL	NULL	NULL	NULL	NULL	NULL	NULL	NULL	NULL	NULL	NULL	NULL	NULL	NULL	NULL	NULL	NULL	NULL	NULL	NULL	NULL	NULL	NULL	NULL	NULL	NULL	NULL	NULL	NULL	NULL	NULL	NULL	NULL	NULL	NULL	NULL	NULL
16002655	24439304	74	0	WHITE	Medicare	English	DIVORCED	13.3	K/uL	3.6	m/uL	NULL	NULL	NULL	NULL	189	K/uL	11.6	g/dL	14.5	%	36.5	%	NULL	NULL	NULL	NULL	NULL	NULL	141	mEq/L	4.1	mEq/L	10.7	mg/dL	109	mEq/L	142	mg/dL	NULL	NULL	12	mEq/L	NULL	NULL	NULL	NULL	NULL	NULL
16008895	21897930	78	1	HISPANIC/LATINO - MEXICAN	Medicare	English	MARRIED	6.3	K/uL	3.85	m/uL	NULL	NULL	NULL	NULL	92	K/uL	12.5	g/dL	13.6	%	39.3	%	3.7	g/dL	NULL	NULL	NULL	NULL	135	mEq/L	3.95	mEq/L	9.05	mg/dL	97	mEq/L	150	mg/dL	NULL	NULL	13.5	mEq/L	NULL	NULL	NULL	NULL	NULL	NULL
16012158	25442625	76	0	WHITE	Medicare	English	MARRIED	NULL	NULL	NULL	NULL	NULL	NULL	NULL	NULL	NULL	NULL	NULL	NULL	NULL	NULL	NULL	NULL	NULL	NULL	NULL	NULL	NULL	NULL	NULL	NULL	NULL	NULL	NULL	NULL	NULL	NULL	NULL	NULL	NULL	NULL	NULL	NULL	NULL	NULL	NULL	NULL	NULL	NULL
16016363	28847874	63	0	WHITE	Medicaid	English	SINGLE	15.9	K/uL	4.45	m/uL	NULL	NULL	NULL	NULL	346	K/uL	12.3	g/dL	13.9	%	39.7	%	NULL	NULL	NULL	NULL	NULL	NULL	139	mEq/L	4.1	mEq/L	NULL	NULL	99	mEq/L	178	mg/dL	NULL	NULL	15	mEq/L	NULL	NULL	NULL	NULL	NULL	NULL
16022705	28255919	92	1	WHITE	Medicare	Italian	MARRIED	5.85	K/uL	2.62	m/uL	NULL	NULL	NULL	NULL	175	K/uL	8.3	g/dL	14.95	%	26.3	%	NULL	NULL	NULL	NULL	NULL	NULL	139.5	mEq/L	4	mEq/L	NULL	NULL	107	mEq/L	86.5	mg/dL	NULL	NULL	12	mEq/L	7.32	units	44	mm Hg	169.5	mm Hg
16031759	24381768	91	1	UNKNOWN	Medicare	English	MARRIED	7.8	K/uL	3.69	m/uL	NULL	NULL	NULL	NULL	164.33	K/uL	12.07	g/dL	14.9	%	37.43	%	NULL	NULL	NULL	NULL	NULL	NULL	138.33	mEq/L	4.27	mEq/L	7.97	mg/dL	102	mEq/L	184.33	mg/dL	NULL	NULL	16.67	mEq/L	7.34	units	50.75	mm Hg	32.75	mm Hg
16031776	26357388	78	1	WHITE	Medicare	English	MARRIED	14.5	K/uL	4.04	m/uL	12.25	K/uL	0.41	K/uL	172.5	K/uL	11.45	g/dL	13.8	%	35.7	%	NULL	NULL	NULL	NULL	NULL	NULL	143.5	mEq/L	4.3	mEq/L	8.6	mg/dL	101	mEq/L	120.5	mg/dL	NULL	NULL	19.5	mEq/L	NULL	NULL	NULL	NULL	NULL	NULL
16032156	27138353	92	0	WHITE	Medicare	Modern Greek (1453-)	WIDOWED	8.9	K/uL	3.87	m/uL	NULL	NULL	NULL	NULL	320	K/uL	10.3	g/dL	15.9	%	34.1	%	NULL	NULL	NULL	NULL	NULL	NULL	144.5	mEq/L	3.8	mEq/L	NULL	NULL	106	mEq/L	146.5	mg/dL	NULL	NULL	8	mEq/L	NULL	NULL	NULL	NULL	NULL	NULL
16049244	27924141	67	1	WHITE	Private	English	MARRIED	14.55	K/uL	5.41	m/uL	NULL	NULL	NULL	NULL	294	K/uL	15.2	g/dL	14.9	%	46.65	%	4.2	g/dL	NULL	NULL	NULL	NULL	136	mEq/L	4.55	mEq/L	NULL	NULL	101.5	mEq/L	171	mg/dL	6.2	%	18.5	mEq/L	NULL	NULL	NULL	NULL	NULL	NULL
16050697	25893681	70	0	UNABLE TO OBTAIN	Medicare	English	NULL	NULL	NULL	NULL	NULL	NULL	NULL	NULL	NULL	NULL	NULL	NULL	NULL	NULL	NULL	NULL	NULL	NULL	NULL	NULL	NULL	NULL	NULL	NULL	NULL	NULL	NULL	NULL	NULL	NULL	NULL	NULL	NULL	NULL	NULL	NULL	NULL	7.29	units	45	mm Hg	130	mm Hg
16063375	22869945	60	1	OTHER	Medicaid	English	MARRIED	NULL	NULL	NULL	NULL	NULL	NULL	NULL	NULL	NULL	NULL	NULL	NULL	NULL	NULL	NULL	NULL	NULL	NULL	NULL	NULL	NULL	NULL	NULL	NULL	NULL	NULL	NULL	NULL	NULL	NULL	NULL	NULL	NULL	NULL	NULL	NULL	NULL	NULL	NULL	NULL	NULL	NULL
16069105	24850723	77	0	WHITE	Medicare	English	WIDOWED	6.3	K/uL	3.08	m/uL	NULL	NULL	NULL	NULL	220	K/uL	8.4	g/dL	17.6	%	27.8	%	3.3	g/dL	NULL	NULL	NULL	NULL	142	mEq/L	4.4	mEq/L	8.8	mg/dL	97	mEq/L	216	mg/dL	6.7	%	13	mEq/L	NULL	NULL	NULL	NULL	NULL	NULL
16077678	21030392	68	1	WHITE	Medicare	English	MARRIED	6.5	K/uL	3.35	m/uL	NULL	NULL	NULL	NULL	261	K/uL	9.3	g/dL	14	%	29.5	%	NULL	NULL	NULL	NULL	NULL	NULL	137	mEq/L	4.1	mEq/L	8.8	mg/dL	100	mEq/L	167	mg/dL	NULL	NULL	9	mEq/L	NULL	NULL	NULL	NULL	NULL	NULL
16080393	27468720	62	0	WHITE	Medicare	English	WIDOWED	5.93	K/uL	3.02	m/uL	NULL	NULL	NULL	NULL	187.33	K/uL	7.83	g/dL	16.4	%	26.8	%	3.4	g/dL	NULL	NULL	NULL	NULL	131.33	mEq/L	4.93	mEq/L	8.8	mg/dL	87.67	mEq/L	229.67	mg/dL	NULL	NULL	11.33	mEq/L	7.37	units	63	mm Hg	142	mm Hg
16093254	23265727	82	0	WHITE	Medicare	English	WIDOWED	NULL	NULL	NULL	NULL	NULL	NULL	NULL	NULL	NULL	NULL	NULL	NULL	NULL	NULL	NULL	NULL	NULL	NULL	NULL	NULL	NULL	NULL	NULL	NULL	NULL	NULL	NULL	NULL	NULL	NULL	NULL	NULL	NULL	NULL	NULL	NULL	NULL	NULL	NULL	NULL	NULL	NULL
16100326	27513098	79	0	WHITE	Medicare	English	DIVORCED	17.64	K/uL	3.62	m/uL	12.69	K/uL	0.81	K/uL	142.2	K/uL	10.64	g/dL	15	%	32.48	%	NULL	NULL	NULL	NULL	NULL	NULL	143.67	mEq/L	4.67	mEq/L	8.17	mg/dL	111.33	mEq/L	186.67	mg/dL	NULL	NULL	11	mEq/L	7.27	units	50.67	mm Hg	98.5	mm Hg
16102735	29408583	60	0	WHITE	Medicare	English	SINGLE	8.7	K/uL	2.44	m/uL	NULL	NULL	NULL	NULL	183	K/uL	7	g/dL	15.3	%	23.1	%	NULL	NULL	NULL	NULL	NULL	NULL	151	mEq/L	4.05	mEq/L	9.55	mg/dL	106	mEq/L	129	mg/dL	NULL	NULL	18.5	mEq/L	7.54	units	39	mm Hg	224	mm Hg
16114223	26447903	68	1	BLACK/AFRICAN AMERICAN	Medicare	English	MARRIED	8.1	K/uL	3.53	m/uL	NULL	NULL	NULL	NULL	125	K/uL	10.8	g/dL	15.8	%	34.2	%	NULL	NULL	NULL	NULL	NULL	NULL	145	mEq/L	4	mEq/L	9	mg/dL	107	mEq/L	116	mg/dL	NULL	NULL	15	mEq/L	NULL	NULL	NULL	NULL	NULL	NULL
16124759	21350172	77	0	WHITE	Medicare	English	SINGLE	7.9	K/uL	4.61	m/uL	NULL	NULL	NULL	NULL	220	K/uL	14.3	g/dL	13.4	%	42	%	NULL	NULL	NULL	NULL	NULL	NULL	143	mEq/L	3.85	mEq/L	8.95	mg/dL	106	mEq/L	130.5	mg/dL	NULL	NULL	16.5	mEq/L	NULL	NULL	NULL	NULL	NULL	NULL
16124929	28568832	85	1	WHITE	Medicare	English	WIDOWED	NULL	NULL	NULL	NULL	NULL	NULL	NULL	NULL	NULL	NULL	NULL	NULL	NULL	NULL	NULL	NULL	NULL	NULL	NULL	NULL	NULL	NULL	NULL	NULL	NULL	NULL	NULL	NULL	NULL	NULL	NULL	NULL	NULL	NULL	NULL	NULL	NULL	NULL	NULL	NULL	NULL	NULL
16126471	27987540	50	1	WHITE	Medicaid	English	SINGLE	9.3	K/uL	5.02	m/uL	NULL	NULL	NULL	NULL	230	K/uL	13.1	g/dL	17.9	%	43	%	NULL	NULL	NULL	NULL	NULL	NULL	135	mEq/L	4.9	mEq/L	8.45	mg/dL	98.5	mEq/L	172	mg/dL	NULL	NULL	13	mEq/L	NULL	NULL	NULL	NULL	NULL	NULL
16129652	25275629	79	0	WHITE	Medicare	English	MARRIED	7.5	K/uL	3.79	m/uL	NULL	NULL	NULL	NULL	182	K/uL	12.4	g/dL	15.1	%	38.5	%	4.2	g/dL	NULL	NULL	NULL	NULL	134.5	mEq/L	5.1	mEq/L	9	mg/dL	101	mEq/L	188	mg/dL	5.8	%	17.5	mEq/L	NULL	NULL	NULL	NULL	NULL	NULL
16132012	27023718	68	1	WHITE	Medicare	English	WIDOWED	68.2	K/uL	3.08	m/uL	52.12	K/uL	0.63	K/uL	273	K/uL	7.75	g/dL	21.75	%	26.9	%	2.3	g/dL	NULL	NULL	NULL	NULL	145	mEq/L	3.8	mEq/L	7.25	mg/dL	106.5	mEq/L	107	mg/dL	5.4	%	13	mEq/L	7.36	units	57	mm Hg	88.33	mm Hg
16138973	23252465	66	0	WHITE - OTHER EUROPEAN	Medicare	English	DIVORCED	6.4	K/uL	3.82	m/uL	NULL	NULL	NULL	NULL	291	K/uL	10.9	g/dL	15.3	%	35.3	%	NULL	NULL	NULL	NULL	NULL	NULL	144	mEq/L	4.1	mEq/L	9.8	mg/dL	103	mEq/L	152	mg/dL	NULL	NULL	17	mEq/L	NULL	NULL	NULL	NULL	NULL	NULL
16139825	23813399	65	1	WHITE	Medicare	English	SINGLE	6.45	K/uL	3.28	m/uL	NULL	NULL	NULL	NULL	223.5	K/uL	8.7	g/dL	17.25	%	28.05	%	2.8	g/dL	NULL	NULL	NULL	NULL	134	mEq/L	3.87	mEq/L	13.57	mg/dL	105	mEq/L	94	mg/dL	NULL	NULL	8	mEq/L	NULL	NULL	NULL	NULL	NULL	NULL
16140979	26684381	57	0	WHITE	Medicare	English	MARRIED	9.9	K/uL	5.34	m/uL	NULL	NULL	NULL	NULL	168	K/uL	14.5	g/dL	14.7	%	45.9	%	NULL	NULL	NULL	NULL	NULL	NULL	138	mEq/L	4.6	mEq/L	9.3	mg/dL	96	mEq/L	335	mg/dL	NULL	NULL	17	mEq/L	7.32	units	62.5	mm Hg	85	mm Hg
16143817	25035300	72	1	WHITE	Medicare	English	WIDOWED	10.9	K/uL	4.2	m/uL	NULL	NULL	NULL	NULL	398	K/uL	11.4	g/dL	13.6	%	34.6	%	NULL	NULL	NULL	NULL	NULL	NULL	139	mEq/L	4.1	mEq/L	9	mg/dL	96	mEq/L	147	mg/dL	NULL	NULL	13	mEq/L	NULL	NULL	NULL	NULL	NULL	NULL
16150166	23887604	55	1	WHITE	Medicare	English	SINGLE	8.85	K/uL	2.3	m/uL	NULL	NULL	NULL	NULL	125.25	K/uL	6.78	g/dL	18.58	%	22.85	%	3.2	g/dL	NULL	NULL	NULL	NULL	142.25	mEq/L	3.3	mEq/L	8.4	mg/dL	93	mEq/L	173.75	mg/dL	NULL	NULL	15	mEq/L	7.34	units	66	mm Hg	46	mm Hg
16161412	22009499	63	1	BLACK/AFRICAN AMERICAN	Private	English	MARRIED	8	K/uL	3.83	m/uL	NULL	NULL	NULL	NULL	151	K/uL	11.7	g/dL	12.6	%	35.9	%	NULL	NULL	NULL	NULL	NULL	NULL	NULL	NULL	NULL	NULL	NULL	NULL	NULL	NULL	NULL	NULL	NULL	NULL	NULL	NULL	NULL	NULL	NULL	NULL	NULL	NULL
16162065	25814720	69	0	WHITE	Medicare	English	MARRIED	7.4	K/uL	4.06	m/uL	NULL	NULL	NULL	NULL	255	K/uL	12.1	g/dL	13.3	%	36.2	%	NULL	NULL	NULL	NULL	NULL	NULL	137	mEq/L	2.9	mEq/L	9.5	mg/dL	99	mEq/L	150	mg/dL	6.4	%	10	mEq/L	NULL	NULL	NULL	NULL	NULL	NULL
16165408	23853798	74	0	WHITE	Medicare	English	MARRIED	15.7	K/uL	4.12	m/uL	NULL	NULL	NULL	NULL	385	K/uL	12.2	g/dL	17.2	%	38.6	%	NULL	NULL	NULL	NULL	NULL	NULL	135	mEq/L	4.1	mEq/L	9.3	mg/dL	91	mEq/L	175	mg/dL	NULL	NULL	19	mEq/L	NULL	NULL	NULL	NULL	NULL	NULL
16174634	25783046	57	1	WHITE	Medicaid	English	SINGLE	NULL	NULL	NULL	NULL	NULL	NULL	NULL	NULL	NULL	NULL	NULL	NULL	NULL	NULL	NULL	NULL	NULL	NULL	NULL	NULL	NULL	NULL	NULL	NULL	NULL	NULL	NULL	NULL	NULL	NULL	NULL	NULL	NULL	NULL	NULL	NULL	NULL	NULL	NULL	NULL	NULL	NULL
16175934	29898678	73	0	WHITE	Medicare	English	DIVORCED	9.1	K/uL	4.88	m/uL	6.5	K/uL	1.75	K/uL	183	K/uL	12.4	g/dL	14.9	%	39.3	%	NULL	NULL	NULL	NULL	NULL	NULL	142	mEq/L	3.5	mEq/L	10.2	mg/dL	98	mEq/L	197	mg/dL	NULL	NULL	26	mEq/L	NULL	NULL	NULL	NULL	NULL	NULL
16179766	25885523	68	0	WHITE	Medicare	English	MARRIED	NULL	NULL	NULL	NULL	NULL	NULL	NULL	NULL	NULL	NULL	NULL	NULL	NULL	NULL	NULL	NULL	NULL	NULL	NULL	NULL	NULL	NULL	NULL	NULL	NULL	NULL	NULL	NULL	NULL	NULL	NULL	NULL	NULL	NULL	NULL	NULL	NULL	NULL	NULL	NULL	NULL	NULL
16186978	22614173	71	1	BLACK/AFRICAN AMERICAN	Medicare	English	MARRIED	NULL	NULL	NULL	NULL	NULL	NULL	NULL	NULL	NULL	NULL	NULL	NULL	NULL	NULL	NULL	NULL	NULL	NULL	NULL	NULL	NULL	NULL	NULL	NULL	NULL	NULL	NULL	NULL	NULL	NULL	NULL	NULL	NULL	NULL	NULL	NULL	NULL	NULL	NULL	NULL	NULL	NULL
16198154	27836254	60	1	BLACK/AFRICAN AMERICAN	Other	English	SINGLE	NULL	NULL	NULL	NULL	NULL	NULL	NULL	NULL	NULL	NULL	NULL	NULL	NULL	NULL	NULL	NULL	NULL	NULL	NULL	NULL	NULL	NULL	NULL	NULL	NULL	NULL	NULL	NULL	NULL	NULL	NULL	NULL	NULL	NULL	NULL	NULL	NULL	NULL	NULL	NULL	NULL	NULL
16224150	28893498	68	1	WHITE	Medicare	English	DIVORCED	17.25	K/uL	4.54	m/uL	NULL	NULL	NULL	NULL	332.5	K/uL	13	g/dL	14.25	%	39.65	%	NULL	NULL	NULL	NULL	NULL	NULL	137	mEq/L	4.25	mEq/L	9.2	mg/dL	101	mEq/L	249.5	mg/dL	NULL	NULL	17.5	mEq/L	7.41	units	39	mm Hg	74	mm Hg
16236827	29737786	71	0	WHITE - OTHER EUROPEAN	Medicare	English	SINGLE	NULL	NULL	NULL	NULL	NULL	NULL	NULL	NULL	NULL	NULL	NULL	NULL	NULL	NULL	NULL	NULL	NULL	NULL	NULL	NULL	NULL	NULL	NULL	NULL	NULL	NULL	NULL	NULL	NULL	NULL	NULL	NULL	NULL	NULL	NULL	NULL	NULL	NULL	NULL	NULL	NULL	NULL
16241450	26249442	77	0	WHITE	Other	English	SINGLE	4.7	K/uL	3.99	m/uL	NULL	NULL	NULL	NULL	198	K/uL	12	g/dL	14.6	%	38.6	%	NULL	NULL	NULL	NULL	NULL	NULL	142	mEq/L	3.9	mEq/L	8.8	mg/dL	104	mEq/L	72	mg/dL	NULL	NULL	22	mEq/L	NULL	NULL	NULL	NULL	NULL	NULL
16246045	21993183	81	0	BLACK/AFRICAN AMERICAN	Medicare	English	SINGLE	7.9	K/uL	3.96	m/uL	5.21	K/uL	1.83	K/uL	204	K/uL	10.2	g/dL	14.3	%	34.6	%	3.9	g/dL	NULL	NULL	NULL	NULL	147	mEq/L	4.8	mEq/L	9.1	mg/dL	108	mEq/L	95	mg/dL	NULL	NULL	17	mEq/L	NULL	NULL	NULL	NULL	NULL	NULL
16251631	21146550	73	1	WHITE	Medicare	English	SINGLE	5.25	K/uL	4.28	m/uL	NULL	NULL	NULL	NULL	134	K/uL	11.45	g/dL	18.25	%	35.55	%	NULL	NULL	NULL	NULL	NULL	NULL	142	mEq/L	3.45	mEq/L	8.2	mg/dL	103	mEq/L	102.5	mg/dL	NULL	NULL	12	mEq/L	NULL	NULL	NULL	NULL	NULL	NULL
16252226	22252841	66	1	UNABLE TO OBTAIN	Private	English	NULL	11.3	K/uL	4.22	m/uL	NULL	NULL	NULL	NULL	255	K/uL	12.6	g/dL	13	%	39	%	NULL	NULL	NULL	NULL	NULL	NULL	138	mEq/L	4.2	mEq/L	NULL	NULL	106	mEq/L	93	mg/dL	NULL	NULL	9	mEq/L	NULL	NULL	NULL	NULL	NULL	NULL
16256767	21400585	56	0	BLACK/AFRICAN AMERICAN	Medicaid	English	SINGLE	NULL	NULL	NULL	NULL	NULL	NULL	NULL	NULL	NULL	NULL	NULL	NULL	NULL	NULL	NULL	NULL	NULL	NULL	NULL	NULL	NULL	NULL	NULL	NULL	NULL	NULL	NULL	NULL	NULL	NULL	NULL	NULL	NULL	NULL	NULL	NULL	NULL	NULL	NULL	NULL	NULL	NULL
16263223	22904714	58	1	WHITE	Private	English	SINGLE	NULL	NULL	NULL	NULL	NULL	NULL	NULL	NULL	NULL	NULL	NULL	NULL	NULL	NULL	NULL	NULL	NULL	NULL	NULL	NULL	NULL	NULL	NULL	NULL	NULL	NULL	NULL	NULL	NULL	NULL	NULL	NULL	NULL	NULL	NULL	NULL	NULL	NULL	NULL	NULL	NULL	NULL
16264276	28233646	64	1	WHITE	Medicare	English	SINGLE	20.35	K/uL	3.86	m/uL	17.71	K/uL	0.6	K/uL	196.5	K/uL	11.55	g/dL	14.85	%	36.2	%	NULL	NULL	NULL	NULL	NULL	NULL	136.4	mEq/L	5.26	mEq/L	6.9	mg/dL	97.2	mEq/L	167.6	mg/dL	NULL	NULL	22.2	mEq/L	7.28	units	42.36	mm Hg	59.45	mm Hg
16266235	21893000	76	1	WHITE	Medicare	English	WIDOWED	NULL	NULL	NULL	NULL	NULL	NULL	NULL	NULL	NULL	NULL	NULL	NULL	NULL	NULL	NULL	NULL	NULL	NULL	NULL	NULL	NULL	NULL	NULL	NULL	NULL	NULL	NULL	NULL	NULL	NULL	NULL	NULL	NULL	NULL	NULL	NULL	NULL	NULL	NULL	NULL	NULL	NULL
16268354	26333403	69	1	WHITE	Medicaid	English	SINGLE	10.67	K/uL	3.7	m/uL	NULL	NULL	NULL	NULL	156	K/uL	10.8	g/dL	13.87	%	32.47	%	NULL	NULL	NULL	NULL	NULL	NULL	137.33	mEq/L	3.57	mEq/L	7.97	mg/dL	102.33	mEq/L	113	mg/dL	NULL	NULL	14.33	mEq/L	NULL	NULL	NULL	NULL	NULL	NULL
16268804	29219847	67	1	WHITE	Medicare	English	SINGLE	10.08	K/uL	2.32	m/uL	13.07	K/uL	1.22	K/uL	262.4	K/uL	6.78	g/dL	16.36	%	21.56	%	3	g/dL	NULL	NULL	NULL	NULL	138.67	mEq/L	5.17	mEq/L	7.63	mg/dL	104	mEq/L	109	mg/dL	NULL	NULL	28.33	mEq/L	7.2	units	34.67	mm Hg	56.67	mm Hg
16273222	29989646	78	0	WHITE	Medicare	English	MARRIED	NULL	NULL	NULL	NULL	NULL	NULL	NULL	NULL	NULL	NULL	NULL	NULL	NULL	NULL	NULL	NULL	NULL	NULL	NULL	NULL	NULL	NULL	NULL	NULL	NULL	NULL	NULL	NULL	NULL	NULL	NULL	NULL	NULL	NULL	NULL	NULL	NULL	NULL	NULL	NULL	NULL	NULL
16296474	23741800	82	1	WHITE	Medicare	English	MARRIED	12.4	K/uL	3.65	m/uL	NULL	NULL	NULL	NULL	148	K/uL	10.9	g/dL	13.4	%	34.1	%	NULL	NULL	NULL	NULL	NULL	NULL	135	mEq/L	3.7	mEq/L	8.2	mg/dL	100	mEq/L	135	mg/dL	NULL	NULL	19	mEq/L	NULL	NULL	NULL	NULL	NULL	NULL
16297162	22245744	72	0	WHITE	Medicare	English	MARRIED	13.35	K/uL	3.47	m/uL	11.09	K/uL	1.1	K/uL	307	K/uL	10.4	g/dL	17	%	33.35	%	3.4	g/dL	3.4	g/dL	6.7	g/dL	131.5	mEq/L	5.4	mEq/L	7.7	mg/dL	90.5	mEq/L	121	mg/dL	NULL	NULL	21	mEq/L	7.48	units	27	mm Hg	166	mm Hg
16301957	29626590	78	0	WHITE	Medicare	English	MARRIED	10.3	K/uL	3.52	m/uL	NULL	NULL	NULL	NULL	277	K/uL	10.6	g/dL	13.6	%	32.9	%	NULL	NULL	NULL	NULL	NULL	NULL	139	mEq/L	4.45	mEq/L	9.4	mg/dL	99	mEq/L	177	mg/dL	NULL	NULL	18.5	mEq/L	NULL	NULL	NULL	NULL	NULL	NULL
16309791	23158735	76	1	ASIAN - CHINESE	Medicare	Chinese	MARRIED	5.9	K/uL	4.71	m/uL	NULL	NULL	NULL	NULL	126	K/uL	14.6	g/dL	12.7	%	43.4	%	NULL	NULL	NULL	NULL	NULL	NULL	139	mEq/L	4.5	mEq/L	9.1	mg/dL	100	mEq/L	123	mg/dL	5.5	%	16	mEq/L	NULL	NULL	NULL	NULL	NULL	NULL
16311307	24284232	79	1	OTHER	Medicare	Modern Greek (1453-)	MARRIED	9.6	K/uL	3.23	m/uL	NULL	NULL	NULL	NULL	199	K/uL	9.8	g/dL	13.4	%	29	%	NULL	NULL	NULL	NULL	NULL	NULL	138	mEq/L	4.4	mEq/L	8.4	mg/dL	99	mEq/L	263	mg/dL	NULL	NULL	13	mEq/L	NULL	NULL	NULL	NULL	NULL	NULL
16322302	26171133	84	0	WHITE	Medicare	English	MARRIED	5.7	K/uL	3.15	m/uL	3.79	K/uL	1.19	K/uL	136	K/uL	7.7	g/dL	18.4	%	28.3	%	NULL	NULL	NULL	NULL	NULL	NULL	141	mEq/L	4.4	mEq/L	NULL	NULL	104	mEq/L	NULL	NULL	NULL	NULL	12	mEq/L	7.37	units	54.33	mm Hg	152.67	mm Hg
16323322	28088725	63	0	WHITE	Medicare	English	WIDOWED	6.9	K/uL	2.68	m/uL	5.73	K/uL	0.62	K/uL	236	K/uL	7.1	g/dL	21.1	%	24	%	NULL	NULL	NULL	NULL	NULL	NULL	140.5	mEq/L	4	mEq/L	8.8	mg/dL	95	mEq/L	131	mg/dL	NULL	NULL	9.5	mEq/L	7.41	units	54.5	mm Hg	47	mm Hg
16328895	24267334	75	1	WHITE - OTHER EUROPEAN	Medicare	English	SINGLE	5.2	K/uL	2.85	m/uL	NULL	NULL	NULL	NULL	155	K/uL	9.3	g/dL	13.4	%	29	%	3.3	g/dL	NULL	NULL	NULL	NULL	138	mEq/L	3.8	mEq/L	12.8	mg/dL	102	mEq/L	80	mg/dL	NULL	NULL	11	mEq/L	NULL	NULL	NULL	NULL	NULL	NULL
16329372	22258108	84	1	WHITE	Medicare	English	MARRIED	9.5	K/uL	3.4	m/uL	NULL	NULL	NULL	NULL	579	K/uL	10.1	g/dL	15.7	%	31.6	%	NULL	NULL	NULL	NULL	NULL	NULL	142	mEq/L	3.95	mEq/L	9.2	mg/dL	96	mEq/L	140.5	mg/dL	NULL	NULL	20.5	mEq/L	NULL	NULL	NULL	NULL	NULL	NULL
16330993	20255397	59	1	WHITE	Medicare	English	SINGLE	14.45	K/uL	3.79	m/uL	NULL	NULL	NULL	NULL	168.5	K/uL	12.3	g/dL	13.05	%	35.8	%	NULL	NULL	NULL	NULL	NULL	NULL	145	mEq/L	4.15	mEq/L	9.2	mg/dL	104	mEq/L	221.5	mg/dL	NULL	NULL	14	mEq/L	7.34	units	55	mm Hg	106	mm Hg
16338398	22332494	71	1	UNABLE TO OBTAIN	Private	English	NULL	12.73	K/uL	3.9	m/uL	6.08	K/uL	4.02	K/uL	194.67	K/uL	11.8	g/dL	12.57	%	34.73	%	NULL	NULL	NULL	NULL	NULL	NULL	137	mEq/L	4.3	mEq/L	9.7	mg/dL	106.5	mEq/L	225	mg/dL	NULL	NULL	11.5	mEq/L	7.29	units	44.67	mm Hg	227.11	mm Hg
16339429	26979528	72	0	HISPANIC/LATINO - DOMINICAN	Medicare	Spanish	SINGLE	NULL	NULL	NULL	NULL	NULL	NULL	NULL	NULL	NULL	NULL	NULL	NULL	NULL	NULL	NULL	NULL	NULL	NULL	NULL	NULL	NULL	NULL	NULL	NULL	NULL	NULL	NULL	NULL	NULL	NULL	NULL	NULL	NULL	NULL	NULL	NULL	NULL	NULL	NULL	NULL	NULL	NULL
16354637	29808679	74	1	WHITE	Medicare	English	SINGLE	NULL	NULL	NULL	NULL	NULL	NULL	NULL	NULL	NULL	NULL	NULL	NULL	NULL	NULL	NULL	NULL	NULL	NULL	NULL	NULL	NULL	NULL	NULL	NULL	NULL	NULL	NULL	NULL	NULL	NULL	NULL	NULL	NULL	NULL	NULL	NULL	NULL	NULL	NULL	NULL	NULL	NULL
16359521	27641468	74	1	WHITE	Private	English	MARRIED	NULL	NULL	NULL	NULL	NULL	NULL	NULL	NULL	NULL	NULL	NULL	NULL	NULL	NULL	NULL	NULL	NULL	NULL	NULL	NULL	NULL	NULL	NULL	NULL	NULL	NULL	NULL	NULL	NULL	NULL	NULL	NULL	NULL	NULL	NULL	NULL	NULL	NULL	NULL	NULL	NULL	NULL
16364165	27635947	84	1	WHITE	Medicare	English	MARRIED	NULL	NULL	NULL	NULL	NULL	NULL	NULL	NULL	NULL	NULL	NULL	NULL	NULL	NULL	NULL	NULL	NULL	NULL	NULL	NULL	NULL	NULL	NULL	NULL	NULL	NULL	NULL	NULL	NULL	NULL	NULL	NULL	NULL	NULL	NULL	NULL	NULL	NULL	NULL	NULL	NULL	NULL
16378859	28769379	77	0	UNABLE TO OBTAIN	Medicare	English	NULL	7.5	K/uL	3.64	m/uL	NULL	NULL	NULL	NULL	203.33	K/uL	10.77	g/dL	14.03	%	35.63	%	3	g/dL	NULL	NULL	NULL	NULL	141.8	mEq/L	4.3	mEq/L	8.1	mg/dL	99.2	mEq/L	274.6	mg/dL	NULL	NULL	15	mEq/L	7.37	units	54.25	mm Hg	60.5	mm Hg
16379320	20252614	61	0	UNKNOWN	Private	English	NULL	5.9	K/uL	3.31	m/uL	NULL	NULL	NULL	NULL	177	K/uL	8.5	g/dL	18.9	%	29.7	%	NULL	NULL	NULL	NULL	NULL	NULL	145	mEq/L	4.3	mEq/L	8	mg/dL	107	mEq/L	73	mg/dL	NULL	NULL	12	mEq/L	NULL	NULL	NULL	NULL	NULL	NULL
16382729	25999196	69	0	WHITE	Medicare	English	MARRIED	15.2	K/uL	3.36	m/uL	NULL	NULL	NULL	NULL	442	K/uL	11.2	g/dL	14.4	%	33.8	%	2.8	g/dL	NULL	NULL	NULL	NULL	134	mEq/L	5.6	mEq/L	7.7	mg/dL	96	mEq/L	274	mg/dL	NULL	NULL	21	mEq/L	7.43	units	37	mm Hg	63	mm Hg
16395567	28122479	63	0	UNKNOWN	Medicare	English	NULL	5.4	K/uL	3.43	m/uL	NULL	NULL	NULL	NULL	152	K/uL	9.3	g/dL	16.3	%	31.4	%	NULL	NULL	NULL	NULL	NULL	NULL	140	mEq/L	6.4	mEq/L	8.9	mg/dL	102	mEq/L	170	mg/dL	NULL	NULL	20	mEq/L	NULL	NULL	NULL	NULL	NULL	NULL
16401782	20352999	69	1	WHITE	Medicaid	English	SINGLE	15.9	K/uL	4.92	m/uL	NULL	NULL	NULL	NULL	191	K/uL	15.1	g/dL	14	%	50.1	%	3.6	g/dL	4.2	g/dL	7.8	g/dL	136.67	mEq/L	6.1	mEq/L	9.35	mg/dL	97.33	mEq/L	256.67	mg/dL	NULL	NULL	10.67	mEq/L	7.33	units	64.5	mm Hg	42.5	mm Hg
16404358	20886598	80	1	WHITE	Medicare	English	MARRIED	5	K/uL	3.5	m/uL	NULL	NULL	NULL	NULL	77	K/uL	11.4	g/dL	13.7	%	33	%	2.9	g/dL	NULL	NULL	NULL	NULL	117.33	mEq/L	3.75	mEq/L	8.9	mg/dL	82	mEq/L	74	mg/dL	NULL	NULL	13	mEq/L	NULL	NULL	NULL	NULL	NULL	NULL
16411090	26807625	81	0	WHITE	Medicare	English	WIDOWED	8.5	K/uL	3.55	m/uL	NULL	NULL	NULL	NULL	184	K/uL	10.85	g/dL	13.05	%	32.9	%	NULL	NULL	NULL	NULL	NULL	NULL	139.5	mEq/L	4.2	mEq/L	7.95	mg/dL	108	mEq/L	141	mg/dL	NULL	NULL	8.5	mEq/L	NULL	NULL	NULL	NULL	NULL	NULL
16422555	28503053	67	1	WHITE	Medicare	English	SINGLE	9.7	K/uL	3.04	m/uL	NULL	NULL	NULL	NULL	233	K/uL	8.6	g/dL	13.5	%	26.2	%	NULL	NULL	NULL	NULL	NULL	NULL	135.67	mEq/L	5.73	mEq/L	8.3	mg/dL	102	mEq/L	146.67	mg/dL	NULL	NULL	15.67	mEq/L	NULL	NULL	NULL	NULL	NULL	NULL
16429065	28706794	52	0	WHITE	Private	English	MARRIED	NULL	NULL	NULL	NULL	NULL	NULL	NULL	NULL	NULL	NULL	NULL	NULL	NULL	NULL	NULL	NULL	NULL	NULL	NULL	NULL	NULL	NULL	NULL	NULL	NULL	NULL	NULL	NULL	NULL	NULL	NULL	NULL	NULL	NULL	NULL	NULL	NULL	NULL	NULL	NULL	NULL	NULL
16429341	27669982	78	1	WHITE	Medicare	English	MARRIED	6.55	K/uL	3.06	m/uL	4.16	K/uL	0.67	K/uL	216	K/uL	10.25	g/dL	14.9	%	31.45	%	3.2	g/dL	NULL	NULL	NULL	NULL	134	mEq/L	3.83	mEq/L	9.2	mg/dL	91.67	mEq/L	114.33	mg/dL	NULL	NULL	15	mEq/L	NULL	NULL	NULL	NULL	NULL	NULL
16432498	20838771	66	1	WHITE	Medicare	English	MARRIED	8	K/uL	5.05	m/uL	NULL	NULL	NULL	NULL	194	K/uL	16.1	g/dL	13.8	%	47	%	NULL	NULL	NULL	NULL	NULL	NULL	139	mEq/L	4.6	mEq/L	9.8	mg/dL	98	mEq/L	150	mg/dL	NULL	NULL	11	mEq/L	NULL	NULL	NULL	NULL	NULL	NULL
16435700	28682033	83	1	WHITE	Medicare	Modern Greek (1453-)	MARRIED	6.03	K/uL	4.39	m/uL	3.62	K/uL	0.96	K/uL	105.33	K/uL	13.73	g/dL	13.23	%	41.23	%	3.6	g/dL	NULL	NULL	NULL	NULL	140	mEq/L	4.15	mEq/L	8.45	mg/dL	106	mEq/L	165.5	mg/dL	NULL	NULL	10.5	mEq/L	NULL	NULL	NULL	NULL	NULL	NULL
16437204	20647298	84	0	BLACK/AFRICAN AMERICAN	Medicare	English	MARRIED	11.5	K/uL	4.8	m/uL	NULL	NULL	NULL	NULL	248	K/uL	10.9	g/dL	15.9	%	35.7	%	NULL	NULL	NULL	NULL	NULL	NULL	139	mEq/L	3.5	mEq/L	9.1	mg/dL	101	mEq/L	108	mg/dL	5.5	%	12	mEq/L	NULL	NULL	NULL	NULL	NULL	NULL
16438503	21355068	86	0	WHITE	Medicare	English	WIDOWED	NULL	NULL	NULL	NULL	NULL	NULL	NULL	NULL	NULL	NULL	NULL	NULL	NULL	NULL	NULL	NULL	NULL	NULL	NULL	NULL	NULL	NULL	NULL	NULL	NULL	NULL	NULL	NULL	NULL	NULL	NULL	NULL	NULL	NULL	NULL	NULL	NULL	NULL	NULL	NULL	NULL	NULL
16442907	27568540	75	1	WHITE	Medicare	English	SINGLE	12.3	K/uL	3.45	m/uL	NULL	NULL	NULL	NULL	322	K/uL	10.7	g/dL	14.4	%	33.4	%	3.9	g/dL	NULL	NULL	NULL	NULL	137	mEq/L	4.1	mEq/L	10	mg/dL	97	mEq/L	116	mg/dL	5.7	%	13	mEq/L	NULL	NULL	NULL	NULL	NULL	NULL
16442963	25566488	63	0	BLACK/AFRICAN AMERICAN	Medicare	English	SINGLE	9.9	K/uL	3.63	m/uL	5.86	K/uL	2.62	K/uL	253	K/uL	8	g/dL	20.5	%	29	%	NULL	NULL	NULL	NULL	NULL	NULL	145	mEq/L	4.9	mEq/L	9.1	mg/dL	109	mEq/L	68	mg/dL	NULL	NULL	16	mEq/L	NULL	NULL	NULL	NULL	NULL	NULL
16456294	22183853	75	0	WHITE	Medicare	English	MARRIED	6.1	K/uL	3.82	m/uL	NULL	NULL	NULL	NULL	91.5	K/uL	12.35	g/dL	13.15	%	39.5	%	NULL	NULL	NULL	NULL	NULL	NULL	139	mEq/L	5.3	mEq/L	9.2	mg/dL	104	mEq/L	148	mg/dL	NULL	NULL	12	mEq/L	NULL	NULL	NULL	NULL	NULL	NULL
16466390	21035609	72	1	UNKNOWN	Medicare	English	MARRIED	10.1	K/uL	2.85	m/uL	7.21	K/uL	1.4	K/uL	207.33	K/uL	7.25	g/dL	17.37	%	23.96	%	3.47	g/dL	NULL	NULL	NULL	NULL	140	mEq/L	4.2	mEq/L	9.2	mg/dL	104	mEq/L	87	mg/dL	5.6	%	11.5	mEq/L	7.33	units	46.78	mm Hg	180.89	mm Hg
16469649	25345071	79	0	WHITE	Medicare	English	WIDOWED	10.3	K/uL	4.15	m/uL	NULL	NULL	NULL	NULL	293	K/uL	8.5	g/dL	17.2	%	29.2	%	NULL	NULL	NULL	NULL	NULL	NULL	143	mEq/L	3.8	mEq/L	8.9	mg/dL	105	mEq/L	98	mg/dL	NULL	NULL	15	mEq/L	NULL	NULL	NULL	NULL	NULL	NULL
16474436	23696023	68	0	WHITE	Medicare	English	MARRIED	14	K/uL	4.54	m/uL	10.94	K/uL	1.19	K/uL	376.5	K/uL	12.2	g/dL	16.85	%	40.05	%	3.6	g/dL	NULL	NULL	NULL	NULL	143	mEq/L	4.65	mEq/L	9.8	mg/dL	97	mEq/L	157.5	mg/dL	7	%	13	mEq/L	NULL	NULL	NULL	NULL	NULL	NULL
16480801	25284650	73	1	WHITE	Private	Russian	MARRIED	7.2	K/uL	3.51	m/uL	NULL	NULL	NULL	NULL	215	K/uL	10.8	g/dL	14.9	%	32.7	%	3.9	g/dL	NULL	NULL	NULL	NULL	134	mEq/L	4.1	mEq/L	9.7	mg/dL	94	mEq/L	92	mg/dL	NULL	NULL	17	mEq/L	NULL	NULL	NULL	NULL	NULL	NULL
16491344	26442039	65	1	WHITE	Medicare	English	DIVORCED	11.1	K/uL	4.35	m/uL	NULL	NULL	NULL	NULL	243	K/uL	12.7	g/dL	14.6	%	38.6	%	NULL	NULL	NULL	NULL	NULL	NULL	139	mEq/L	4.1	mEq/L	8.3	mg/dL	99	mEq/L	125	mg/dL	NULL	NULL	14	mEq/L	NULL	NULL	NULL	NULL	NULL	NULL
16499543	29826483	73	1	WHITE	Medicare	English	MARRIED	NULL	NULL	NULL	NULL	NULL	NULL	NULL	NULL	NULL	NULL	NULL	NULL	NULL	NULL	NULL	NULL	NULL	NULL	NULL	NULL	NULL	NULL	134.5	mEq/L	3.9	mEq/L	9.55	mg/dL	95	mEq/L	379	mg/dL	NULL	NULL	15	mEq/L	7.42	units	39	mm Hg	97	mm Hg
16499624	23119055	51	1	WHITE	Medicare	English	NULL	8.73	K/uL	2.33	m/uL	5.8	K/uL	0.91	K/uL	167.25	K/uL	7.23	g/dL	21.45	%	23.35	%	2.75	g/dL	NULL	NULL	NULL	NULL	137.75	mEq/L	5.88	mEq/L	8.43	mg/dL	102.5	mEq/L	199.75	mg/dL	NULL	NULL	11.75	mEq/L	7.33	units	58	mm Hg	128	mm Hg
16502231	20484273	68	0	WHITE	Medicare	English	DIVORCED	11.3	K/uL	3.36	m/uL	10.37	K/uL	1.38	K/uL	149.5	K/uL	11.55	g/dL	13.1	%	33.6	%	3	g/dL	NULL	NULL	NULL	NULL	134	mEq/L	3.4	mEq/L	9.1	mg/dL	98.5	mEq/L	186.5	mg/dL	NULL	NULL	12	mEq/L	NULL	NULL	NULL	NULL	NULL	NULL
16505133	29064409	80	0	WHITE	Medicare	English	WIDOWED	9.4	K/uL	4.5	m/uL	3.32	K/uL	3.83	K/uL	178	K/uL	12.9	g/dL	14.75	%	41.3	%	3.5	g/dL	NULL	NULL	NULL	NULL	138.5	mEq/L	3.75	mEq/L	8	mg/dL	99	mEq/L	255	mg/dL	NULL	NULL	17	mEq/L	7.34	units	53	mm Hg	52	mm Hg
16515801	20747572	57	1	WHITE	Medicare	English	MARRIED	12.9	K/uL	4.51	m/uL	12.29	K/uL	0.84	K/uL	258	K/uL	13.4	g/dL	12.45	%	39.95	%	4.1	g/dL	NULL	NULL	NULL	NULL	135.5	mEq/L	4.9	mEq/L	8.95	mg/dL	95.5	mEq/L	430	mg/dL	11	%	18.5	mEq/L	7.3	units	46	mm Hg	51.5	mm Hg
16520386	22420672	55	1	OTHER	Medicaid	English	NULL	13.2	K/uL	5.2	m/uL	9.97	K/uL	1.98	K/uL	266	K/uL	15.4	g/dL	14.2	%	49.1	%	NULL	NULL	NULL	NULL	NULL	NULL	134	mEq/L	4.7	mEq/L	9.2	mg/dL	91	mEq/L	199	mg/dL	NULL	NULL	17	mEq/L	7.43	units	46	mm Hg	107.5	mm Hg
16524079	27628219	60	0	WHITE	Medicaid	English	SINGLE	15.2	K/uL	4.32	m/uL	NULL	NULL	NULL	NULL	184.5	K/uL	12.95	g/dL	12.35	%	38.25	%	NULL	NULL	NULL	NULL	NULL	NULL	140	mEq/L	3.85	mEq/L	8.35	mg/dL	101	mEq/L	176.5	mg/dL	8.1	%	14	mEq/L	7.4	units	42	mm Hg	59	mm Hg
16526995	25696697	76	1	WHITE	Medicare	English	MARRIED	3.8	K/uL	3.57	m/uL	NULL	NULL	NULL	NULL	121	K/uL	10.5	g/dL	12.6	%	32.9	%	NULL	NULL	NULL	NULL	NULL	NULL	140	mEq/L	3.9	mEq/L	9.3	mg/dL	NULL	NULL	167	mg/dL	NULL	NULL	15	mEq/L	NULL	NULL	NULL	NULL	NULL	NULL
16532431	27448063	82	1	WHITE	Medicare	English	WIDOWED	12.5	K/uL	3.52	m/uL	NULL	NULL	NULL	NULL	286	K/uL	10	g/dL	14.2	%	31	%	NULL	NULL	NULL	NULL	NULL	NULL	147	mEq/L	4.3	mEq/L	9.3	mg/dL	108	mEq/L	82	mg/dL	NULL	NULL	14	mEq/L	7.38	units	43	mm Hg	87	mm Hg
16534814	24826852	84	1	WHITE - OTHER EUROPEAN	Medicare	English	MARRIED	7.9	K/uL	4.07	m/uL	NULL	NULL	NULL	NULL	243	K/uL	11.4	g/dL	15.1	%	35.5	%	NULL	NULL	NULL	NULL	NULL	NULL	142	mEq/L	4.3	mEq/L	8.8	mg/dL	98	mEq/L	116	mg/dL	NULL	NULL	22	mEq/L	NULL	NULL	NULL	NULL	NULL	NULL
16535911	20811812	66	0	WHITE	Medicare	English	SINGLE	16.5	K/uL	4.03	m/uL	NULL	NULL	NULL	NULL	147	K/uL	13.2	g/dL	13	%	39.4	%	3.2	g/dL	NULL	NULL	NULL	NULL	138	mEq/L	3.4	mEq/L	8.5	mg/dL	102	mEq/L	129	mg/dL	NULL	NULL	10	mEq/L	NULL	NULL	NULL	NULL	NULL	NULL
16547190	22480685	83	0	WHITE	Medicare	English	SINGLE	12.1	K/uL	4.81	m/uL	NULL	NULL	NULL	NULL	274	K/uL	10.4	g/dL	20.5	%	35.9	%	NULL	NULL	NULL	NULL	NULL	NULL	135.33	mEq/L	4.57	mEq/L	8.43	mg/dL	93.67	mEq/L	180.33	mg/dL	NULL	NULL	17	mEq/L	7.37	units	53	mm Hg	142	mm Hg
16559103	27727916	77	1	WHITE	Medicare	English	MARRIED	5.8	K/uL	4.85	m/uL	NULL	NULL	NULL	NULL	139	K/uL	14.8	g/dL	12.8	%	45.2	%	NULL	NULL	NULL	NULL	NULL	NULL	143	mEq/L	4.5	mEq/L	9.1	mg/dL	102	mEq/L	130	mg/dL	NULL	NULL	14	mEq/L	7.4	units	36	mm Hg	235	mm Hg
16564884	23172820	78	1	WHITE	Medicare	English	SINGLE	16.3	K/uL	5.05	m/uL	11.69	K/uL	2.69	K/uL	195	K/uL	14.7	g/dL	13.2	%	44.9	%	NULL	NULL	NULL	NULL	NULL	NULL	145	mEq/L	4.1	mEq/L	9.6	mg/dL	100	mEq/L	114	mg/dL	NULL	NULL	23	mEq/L	NULL	NULL	NULL	NULL	NULL	NULL
16575454	20338657	49	1	WHITE	Private	English	MARRIED	10.4	K/uL	5.38	m/uL	6	K/uL	2.67	K/uL	253	K/uL	16	g/dL	13.8	%	48.7	%	3.3	g/dL	NULL	NULL	NULL	NULL	133	mEq/L	4.9	mEq/L	8.9	mg/dL	95	mEq/L	252	mg/dL	NULL	NULL	10	mEq/L	NULL	NULL	NULL	NULL	NULL	NULL
16580059	21988157	68	0	WHITE	Medicare	English	SINGLE	18.83	K/uL	2.3	m/uL	10.96	K/uL	3.97	K/uL	135.75	K/uL	6.8	g/dL	13.98	%	21.64	%	NULL	NULL	NULL	NULL	NULL	NULL	137	mEq/L	4.9	mEq/L	8.4	mg/dL	107.5	mEq/L	118	mg/dL	NULL	NULL	9	mEq/L	7.32	units	44.33	mm Hg	266	mm Hg
16580436	23255316	76	1	UNABLE TO OBTAIN	Medicare	English	NULL	6.2	K/uL	4.43	m/uL	NULL	NULL	NULL	NULL	119	K/uL	15	g/dL	19.2	%	47.4	%	NULL	NULL	NULL	NULL	NULL	NULL	139.67	mEq/L	5.28	mEq/L	9.6	mg/dL	107.33	mEq/L	113.33	mg/dL	5.9	%	11	mEq/L	NULL	NULL	NULL	NULL	NULL	NULL
16580466	22410229	67	0	BLACK/CARIBBEAN ISLAND	Other	Haitian	SINGLE	17.3	K/uL	4.33	m/uL	NULL	NULL	NULL	NULL	239	K/uL	11.5	g/dL	13.3	%	35.6	%	NULL	NULL	NULL	NULL	NULL	NULL	136	mEq/L	3.4	mEq/L	8.8	mg/dL	95	mEq/L	101	mg/dL	NULL	NULL	17	mEq/L	NULL	NULL	NULL	NULL	NULL	NULL
16589809	22923229	85	1	OTHER	Medicare	English	MARRIED	7.9	K/uL	3.04	m/uL	5.32	K/uL	0.72	K/uL	133.5	K/uL	8.75	g/dL	14	%	27.95	%	2.9	g/dL	NULL	NULL	NULL	NULL	141	mEq/L	5.7	mEq/L	8.7	mg/dL	113.5	mEq/L	103.5	mg/dL	NULL	NULL	9	mEq/L	NULL	NULL	NULL	NULL	NULL	NULL
16592120	22472229	64	1	WHITE	Medicare	English	SINGLE	NULL	NULL	NULL	NULL	NULL	NULL	NULL	NULL	NULL	NULL	NULL	NULL	NULL	NULL	NULL	NULL	NULL	NULL	NULL	NULL	NULL	NULL	NULL	NULL	NULL	NULL	NULL	NULL	NULL	NULL	NULL	NULL	NULL	NULL	NULL	NULL	NULL	NULL	NULL	NULL	NULL	NULL
16593691	23589370	89	0	WHITE	Medicare	English	MARRIED	5.85	K/uL	2.65	m/uL	NULL	NULL	NULL	NULL	136	K/uL	7.55	g/dL	16.6	%	25.45	%	3.5	g/dL	NULL	NULL	NULL	NULL	142.67	mEq/L	3.57	mEq/L	9.53	mg/dL	101.67	mEq/L	107.67	mg/dL	NULL	NULL	12	mEq/L	NULL	NULL	NULL	NULL	NULL	NULL
16607052	29525032	72	1	WHITE - RUSSIAN	Medicare	Russian	SINGLE	NULL	NULL	NULL	NULL	NULL	NULL	NULL	NULL	NULL	NULL	NULL	NULL	NULL	NULL	NULL	NULL	NULL	NULL	NULL	NULL	NULL	NULL	NULL	NULL	NULL	NULL	NULL	NULL	NULL	NULL	NULL	NULL	NULL	NULL	NULL	NULL	NULL	NULL	NULL	NULL	NULL	NULL
16609888	24268329	72	1	WHITE	Private	English	MARRIED	7.6	K/uL	4.38	m/uL	NULL	NULL	NULL	NULL	209	K/uL	12.8	g/dL	14.5	%	40.3	%	NULL	NULL	NULL	NULL	NULL	NULL	138	mEq/L	4.4	mEq/L	8.4	mg/dL	102	mEq/L	84	mg/dL	NULL	NULL	15	mEq/L	NULL	NULL	NULL	NULL	NULL	NULL
16614315	25627491	71	0	WHITE	Medicare	English	MARRIED	NULL	NULL	NULL	NULL	NULL	NULL	NULL	NULL	NULL	NULL	NULL	NULL	NULL	NULL	NULL	NULL	NULL	NULL	NULL	NULL	NULL	NULL	NULL	NULL	NULL	NULL	NULL	NULL	NULL	NULL	NULL	NULL	NULL	NULL	NULL	NULL	7.4	units	37	mm Hg	170	mm Hg
16619598	28614763	74	0	UNKNOWN	Medicaid	English	DIVORCED	25.3	K/uL	3.56	m/uL	NULL	NULL	NULL	NULL	199	K/uL	11.4	g/dL	13.3	%	37.6	%	NULL	NULL	NULL	NULL	NULL	NULL	143	mEq/L	4.4	mEq/L	NULL	NULL	98	mEq/L	263	mg/dL	NULL	NULL	11	mEq/L	NULL	NULL	NULL	NULL	NULL	NULL
16621313	27706001	57	0	WHITE	Medicaid	English	SINGLE	NULL	NULL	NULL	NULL	NULL	NULL	NULL	NULL	NULL	NULL	NULL	NULL	NULL	NULL	NULL	NULL	NULL	NULL	NULL	NULL	NULL	NULL	NULL	NULL	NULL	NULL	NULL	NULL	NULL	NULL	NULL	NULL	NULL	NULL	NULL	NULL	NULL	NULL	NULL	NULL	NULL	NULL
16621474	22185544	71	1	WHITE	Medicare	English	MARRIED	8.2	K/uL	3.37	m/uL	NULL	NULL	NULL	NULL	180	K/uL	10.7	g/dL	13.1	%	33.5	%	NULL	NULL	NULL	NULL	NULL	NULL	138	mEq/L	4.5	mEq/L	8.4	mg/dL	104	mEq/L	132	mg/dL	NULL	NULL	11	mEq/L	NULL	NULL	NULL	NULL	NULL	NULL
16626433	23865544	77	0	WHITE	Medicare	English	MARRIED	18.7	K/uL	3.54	m/uL	NULL	NULL	NULL	NULL	206	K/uL	10.75	g/dL	14.5	%	30.4	%	NULL	NULL	NULL	NULL	NULL	NULL	138.5	mEq/L	5.1	mEq/L	7.4	mg/dL	110	mEq/L	157.5	mg/dL	NULL	NULL	14.5	mEq/L	7.25	units	44.43	mm Hg	203.71	mm Hg
16646239	22105292	85	1	WHITE	Medicare	English	DIVORCED	6.2	K/uL	4.11	m/uL	NULL	NULL	NULL	NULL	197	K/uL	12.1	g/dL	13.95	%	37	%	3.9	g/dL	NULL	NULL	NULL	NULL	138	mEq/L	4	mEq/L	9.35	mg/dL	103	mEq/L	154.5	mg/dL	7	%	9.5	mEq/L	NULL	NULL	NULL	NULL	NULL	NULL
16647280	27581551	63	1	UNABLE TO OBTAIN	Medicaid	English	MARRIED	NULL	NULL	NULL	NULL	NULL	NULL	NULL	NULL	NULL	NULL	NULL	NULL	NULL	NULL	NULL	NULL	NULL	NULL	NULL	NULL	NULL	NULL	NULL	NULL	NULL	NULL	NULL	NULL	NULL	NULL	NULL	NULL	NULL	NULL	NULL	NULL	NULL	NULL	NULL	NULL	NULL	NULL
16660935	28188981	74	1	WHITE	Medicare	English	MARRIED	21.67	K/uL	4.48	m/uL	NULL	NULL	NULL	NULL	485.33	K/uL	13.97	g/dL	13.9	%	45.3	%	NULL	NULL	NULL	NULL	NULL	NULL	143.75	mEq/L	4.9	mEq/L	9	mg/dL	102.75	mEq/L	198.5	mg/dL	NULL	NULL	21.25	mEq/L	7.37	units	43.2	mm Hg	78.6	mm Hg
16661755	27789074	72	0	HISPANIC/LATINO - PUERTO RICAN	Medicare	Spanish	MARRIED	6.9	K/uL	4.28	m/uL	NULL	NULL	NULL	NULL	179	K/uL	11.1	g/dL	16	%	36.8	%	NULL	NULL	NULL	NULL	NULL	NULL	141	mEq/L	4.2	mEq/L	9	mg/dL	94	mEq/L	122	mg/dL	NULL	NULL	8	mEq/L	7.38	units	68	mm Hg	186	mm Hg
16663349	27928924	81	1	WHITE	Medicare	English	MARRIED	8.85	K/uL	4.9	m/uL	NULL	NULL	NULL	NULL	250.5	K/uL	15.65	g/dL	13.9	%	46.25	%	NULL	NULL	NULL	NULL	NULL	NULL	141	mEq/L	3.25	mEq/L	8.6	mg/dL	98.5	mEq/L	161	mg/dL	NULL	NULL	12	mEq/L	NULL	NULL	NULL	NULL	NULL	NULL
16667335	21008589	72	0	WHITE	Medicare	English	SINGLE	211.95	K/uL	2.65	m/uL	3.08	K/uL	207.71	K/uL	68.5	K/uL	7.67	g/dL	18.4	%	27.2	%	3.9	g/dL	NULL	NULL	NULL	NULL	140.67	mEq/L	4.73	mEq/L	8.57	mg/dL	109.33	mEq/L	183.33	mg/dL	NULL	NULL	18	mEq/L	NULL	NULL	NULL	NULL	NULL	NULL
16671440	20081707	85	1	OTHER	Medicare	English	MARRIED	6.37	K/uL	4.07	m/uL	4.22	K/uL	1.2	K/uL	139	K/uL	12.07	g/dL	14.13	%	36.37	%	2.9	g/dL	NULL	NULL	NULL	NULL	137.5	mEq/L	3.95	mEq/L	8	mg/dL	107	mEq/L	157	mg/dL	NULL	NULL	12.5	mEq/L	NULL	NULL	NULL	NULL	NULL	NULL
16674259	20819855	68	1	WHITE	Medicare	English	SINGLE	7.2	K/uL	2.82	m/uL	NULL	NULL	NULL	NULL	262	K/uL	9.3	g/dL	15.4	%	28.1	%	4.3	g/dL	NULL	NULL	NULL	NULL	140	mEq/L	4.6	mEq/L	9	mg/dL	102	mEq/L	145	mg/dL	NULL	NULL	14	mEq/L	NULL	NULL	NULL	NULL	NULL	NULL
16701863	22024414	78	1	WHITE	Medicare	English	MARRIED	11	K/uL	3.92	m/uL	NULL	NULL	NULL	NULL	235	K/uL	11.8	g/dL	15.7	%	39	%	3	g/dL	NULL	NULL	NULL	NULL	143	mEq/L	3.1	mEq/L	8.7	mg/dL	106	mEq/L	68	mg/dL	NULL	NULL	14	mEq/L	7.53	units	25	mm Hg	74	mm Hg
16709794	27271503	63	1	WHITE	Private	English	MARRIED	4.7	K/uL	4.98	m/uL	NULL	NULL	NULL	NULL	117	K/uL	12.7	g/dL	14.8	%	40.2	%	NULL	NULL	NULL	NULL	NULL	NULL	137	mEq/L	4.4	mEq/L	8.9	mg/dL	102	mEq/L	121	mg/dL	NULL	NULL	14	mEq/L	NULL	NULL	NULL	NULL	NULL	NULL
16711586	21092365	55	1	WHITE	Medicaid	English	SINGLE	24.38	K/uL	2.83	m/uL	NULL	NULL	NULL	NULL	115	K/uL	9.33	g/dL	14.53	%	26.93	%	NULL	NULL	NULL	NULL	NULL	NULL	131.5	mEq/L	4.1	mEq/L	8.95	mg/dL	97.75	mEq/L	167	mg/dL	NULL	NULL	15.75	mEq/L	7.37	units	35.67	mm Hg	143.33	mm Hg
16728026	24015341	82	0	BLACK/AFRICAN AMERICAN	Medicare	English	WIDOWED	5.8	K/uL	3.68	m/uL	NULL	NULL	NULL	NULL	114	K/uL	11.3	g/dL	14.3	%	36.6	%	NULL	NULL	NULL	NULL	NULL	NULL	143	mEq/L	4.2	mEq/L	8.9	mg/dL	99.5	mEq/L	152	mg/dL	NULL	NULL	15	mEq/L	NULL	NULL	NULL	NULL	NULL	NULL
16730991	24122746	71	1	WHITE - OTHER EUROPEAN	Medicare	English	MARRIED	13.55	K/uL	4.53	m/uL	NULL	NULL	NULL	NULL	222	K/uL	15.05	g/dL	12.95	%	44.25	%	NULL	NULL	NULL	NULL	NULL	NULL	135	mEq/L	4.1	mEq/L	9.1	mg/dL	98	mEq/L	184	mg/dL	NULL	NULL	NULL	NULL	NULL	NULL	NULL	NULL	NULL	NULL
16756143	22845358	84	0	BLACK/AFRICAN AMERICAN	Private	English	WIDOWED	9.2	K/uL	3.77	m/uL	NULL	NULL	NULL	NULL	163	K/uL	10.5	g/dL	15.3	%	32.5	%	NULL	NULL	NULL	NULL	NULL	NULL	142	mEq/L	3.9	mEq/L	9.5	mg/dL	104	mEq/L	109	mg/dL	NULL	NULL	13	mEq/L	NULL	NULL	NULL	NULL	NULL	NULL
16756375	25476415	65	1	BLACK/AFRICAN AMERICAN	Private	English	SINGLE	7.3	K/uL	3.86	m/uL	NULL	NULL	NULL	NULL	151	K/uL	11.6	g/dL	12	%	32.4	%	NULL	NULL	NULL	NULL	NULL	NULL	138.5	mEq/L	3.95	mEq/L	8.55	mg/dL	102	mEq/L	219	mg/dL	NULL	NULL	11.5	mEq/L	7.33	units	48	mm Hg	60	mm Hg
16762394	25664591	91	1	BLACK/CAPE VERDEAN	Medicare	Kabuverdianu	WIDOWED	7.2	K/uL	4.3	m/uL	NULL	NULL	NULL	NULL	131	K/uL	12	g/dL	14.6	%	36.9	%	NULL	NULL	NULL	NULL	NULL	NULL	138	mEq/L	4.2	mEq/L	8.6	mg/dL	102	mEq/L	172	mg/dL	NULL	NULL	16	mEq/L	NULL	NULL	NULL	NULL	NULL	NULL
16763091	27707396	55	1	OTHER	Medicaid	English	SINGLE	8	K/uL	3.98	m/uL	NULL	NULL	NULL	NULL	165	K/uL	12.1	g/dL	15.3	%	37.3	%	NULL	NULL	NULL	NULL	NULL	NULL	137	mEq/L	3.6	mEq/L	8.5	mg/dL	100	mEq/L	171	mg/dL	NULL	NULL	20	mEq/L	NULL	NULL	NULL	NULL	NULL	NULL
16783251	20760783	80	0	UNKNOWN	Medicare	English	DIVORCED	NULL	NULL	NULL	NULL	NULL	NULL	NULL	NULL	NULL	NULL	NULL	NULL	NULL	NULL	NULL	NULL	NULL	NULL	NULL	NULL	NULL	NULL	NULL	NULL	NULL	NULL	NULL	NULL	NULL	NULL	NULL	NULL	NULL	NULL	NULL	NULL	NULL	NULL	NULL	NULL	NULL	NULL
16792722	27543194	92	1	WHITE - RUSSIAN	Medicare	Russian	MARRIED	13	K/uL	4.11	m/uL	NULL	NULL	NULL	NULL	144	K/uL	11.5	g/dL	17.1	%	36.3	%	NULL	NULL	NULL	NULL	NULL	NULL	145	mEq/L	4.5	mEq/L	9.2	mg/dL	106	mEq/L	257	mg/dL	NULL	NULL	19	mEq/L	7.38	units	38	mm Hg	63	mm Hg
16793578	25712297	69	0	WHITE	Medicare	English	WIDOWED	9.7	K/uL	3.68	m/uL	8.02	K/uL	0.89	K/uL	494	K/uL	11.3	g/dL	14.3	%	34.5	%	4.4	g/dL	NULL	NULL	NULL	NULL	137.33	mEq/L	4.03	mEq/L	9.6	mg/dL	102.33	mEq/L	352.33	mg/dL	NULL	NULL	17.33	mEq/L	7.37	units	38	mm Hg	108	mm Hg
16813212	25331148	56	1	WHITE	Medicaid	English	SINGLE	11.35	K/uL	3.57	m/uL	NULL	NULL	NULL	NULL	259.5	K/uL	10.6	g/dL	13.15	%	32	%	3.5	g/dL	NULL	NULL	NULL	NULL	132.5	mEq/L	4.25	mEq/L	8.6	mg/dL	99	mEq/L	138.5	mg/dL	NULL	NULL	9.5	mEq/L	NULL	NULL	NULL	NULL	NULL	NULL
16820194	20953641	65	1	WHITE	Medicare	English	SINGLE	9.2	K/uL	3.79	m/uL	NULL	NULL	NULL	NULL	82	K/uL	11.1	g/dL	15.7	%	35.4	%	NULL	NULL	NULL	NULL	NULL	NULL	136	mEq/L	4.8	mEq/L	NULL	NULL	100	mEq/L	164	mg/dL	NULL	NULL	19	mEq/L	NULL	NULL	NULL	NULL	NULL	NULL
16826447	24069995	63	1	AMERICAN INDIAN/ALASKA NATIVE	Medicaid	English	MARRIED	32.8	K/uL	3.57	m/uL	NULL	NULL	NULL	NULL	301	K/uL	9	g/dL	16.1	%	32	%	3.2	g/dL	NULL	NULL	NULL	NULL	138.33	mEq/L	3.87	mEq/L	8.3	mg/dL	91	mEq/L	149.67	mg/dL	NULL	NULL	11	mEq/L	7.33	units	74	mm Hg	44	mm Hg
16830938	29678217	78	0	WHITE	Medicare	English	WIDOWED	14.6	K/uL	3.87	m/uL	NULL	NULL	NULL	NULL	350	K/uL	11.2	g/dL	13.9	%	35.1	%	NULL	NULL	NULL	NULL	NULL	NULL	139	mEq/L	4.7	mEq/L	9.2	mg/dL	106	mEq/L	199	mg/dL	NULL	NULL	12	mEq/L	7.27	units	51.67	mm Hg	104.33	mm Hg
16832642	23517200	71	0	BLACK/AFRICAN AMERICAN	Private	English	SINGLE	NULL	NULL	NULL	NULL	NULL	NULL	NULL	NULL	NULL	NULL	NULL	NULL	NULL	NULL	NULL	NULL	NULL	NULL	NULL	NULL	NULL	NULL	140	mEq/L	5.6	mEq/L	9.7	mg/dL	105	mEq/L	122	mg/dL	NULL	NULL	14	mEq/L	NULL	NULL	NULL	NULL	NULL	NULL
16838280	29085971	78	1	UNKNOWN	Private	English	MARRIED	11.05	K/uL	4.83	m/uL	NULL	NULL	NULL	NULL	274.5	K/uL	13.35	g/dL	14.35	%	42.05	%	NULL	NULL	NULL	NULL	NULL	NULL	142	mEq/L	4.3	mEq/L	9.85	mg/dL	106.5	mEq/L	91.5	mg/dL	NULL	NULL	11	mEq/L	NULL	NULL	NULL	NULL	NULL	NULL
16844745	23271854	87	1	WHITE	Medicare	English	MARRIED	9.3	K/uL	5.06	m/uL	NULL	NULL	NULL	NULL	269	K/uL	13.6	g/dL	16.4	%	44.3	%	NULL	NULL	NULL	NULL	NULL	NULL	135	mEq/L	3.7	mEq/L	10.3	mg/dL	91	mEq/L	125	mg/dL	NULL	NULL	17	mEq/L	NULL	NULL	NULL	NULL	NULL	NULL
16855210	27949408	84	0	BLACK/AFRICAN AMERICAN	Medicaid	English	SINGLE	9.4	K/uL	4.3	m/uL	NULL	NULL	NULL	NULL	181	K/uL	11	g/dL	13.5	%	34.4	%	NULL	NULL	NULL	NULL	NULL	NULL	139	mEq/L	4.9	mEq/L	9.4	mg/dL	98	mEq/L	177	mg/dL	NULL	NULL	15	mEq/L	7.37	units	44	mm Hg	146	mm Hg
16857974	20257174	80	0	WHITE	Medicare	English	SINGLE	NULL	NULL	NULL	NULL	NULL	NULL	NULL	NULL	NULL	NULL	NULL	NULL	NULL	NULL	NULL	NULL	NULL	NULL	NULL	NULL	NULL	NULL	NULL	NULL	NULL	NULL	NULL	NULL	NULL	NULL	NULL	NULL	NULL	NULL	NULL	NULL	NULL	NULL	NULL	NULL	NULL	NULL
16864323	24087718	62	0	WHITE	Private	English	MARRIED	NULL	NULL	NULL	NULL	NULL	NULL	NULL	NULL	NULL	NULL	NULL	NULL	NULL	NULL	NULL	NULL	NULL	NULL	NULL	NULL	NULL	NULL	NULL	NULL	NULL	NULL	NULL	NULL	NULL	NULL	NULL	NULL	NULL	NULL	NULL	NULL	NULL	NULL	NULL	NULL	NULL	NULL
16865766	26624957	66	1	BLACK/AFRICAN AMERICAN	Medicare	English	MARRIED	7.7	K/uL	5.61	m/uL	NULL	NULL	NULL	NULL	234	K/uL	15.5	g/dL	14.4	%	49	%	4	g/dL	NULL	NULL	NULL	NULL	140	mEq/L	4.7	mEq/L	9.3	mg/dL	98	mEq/L	142	mg/dL	NULL	NULL	17	mEq/L	NULL	NULL	NULL	NULL	NULL	NULL
16865976	28141622	91	1	WHITE	Medicare	English	MARRIED	11.45	K/uL	4.92	m/uL	NULL	NULL	NULL	NULL	197	K/uL	15.2	g/dL	16.6	%	45.9	%	3.9	g/dL	NULL	NULL	NULL	NULL	140	mEq/L	4.1	mEq/L	8.7	mg/dL	98	mEq/L	202	mg/dL	NULL	NULL	16	mEq/L	NULL	NULL	NULL	NULL	NULL	NULL
16880925	20201735	80	1	WHITE	Medicare	English	MARRIED	7.6	K/uL	4.02	m/uL	NULL	NULL	NULL	NULL	110	K/uL	12.4	g/dL	14.3	%	36.3	%	NULL	NULL	NULL	NULL	NULL	NULL	138	mEq/L	4.2	mEq/L	8.5	mg/dL	102	mEq/L	112	mg/dL	NULL	NULL	11	mEq/L	NULL	NULL	NULL	NULL	NULL	NULL
16887992	28818016	56	1	WHITE	Medicare	English	SINGLE	9.9	K/uL	3.49	m/uL	NULL	NULL	NULL	NULL	185	K/uL	10.6	g/dL	13.4	%	32.3	%	NULL	NULL	NULL	NULL	NULL	NULL	130	mEq/L	5.4	mEq/L	9.1	mg/dL	89	mEq/L	218	mg/dL	NULL	NULL	11	mEq/L	7.3	units	77.17	mm Hg	48	mm Hg
16894239	25886427	45	0	UNABLE TO OBTAIN	Medicaid	English	MARRIED	12.5	K/uL	2.81	m/uL	8.75	K/uL	1.83	K/uL	156	K/uL	9.2	g/dL	16.3	%	27.1	%	3	g/dL	NULL	NULL	NULL	NULL	129	mEq/L	4.2	mEq/L	9.7	mg/dL	93	mEq/L	250	mg/dL	NULL	NULL	10	mEq/L	NULL	NULL	NULL	NULL	NULL	NULL
16903482	28624611	75	0	WHITE	Medicare	English	MARRIED	76.33	K/uL	3.07	m/uL	60.06	K/uL	3.77	K/uL	331.75	K/uL	9.93	g/dL	23.3	%	33.28	%	NULL	NULL	NULL	NULL	NULL	NULL	135.33	mEq/L	5.6	mEq/L	8.32	mg/dL	103.33	mEq/L	148.83	mg/dL	NULL	NULL	14.33	mEq/L	7.29	units	38.67	mm Hg	52.67	mm Hg
16906891	21491101	74	0	UNKNOWN	Medicaid	English	DIVORCED	18.56	K/uL	3.27	m/uL	21.66	K/uL	1.38	K/uL	274	K/uL	7.68	g/dL	18.96	%	24.1	%	2.5	g/dL	NULL	NULL	NULL	NULL	144.5	mEq/L	4.25	mEq/L	9	mg/dL	105	mEq/L	141	mg/dL	NULL	NULL	19	mEq/L	7.34	units	41	mm Hg	88.5	mm Hg
16909321	26063073	60	1	WHITE	Medicare	English	SINGLE	20.3	K/uL	3.1	m/uL	17.98	K/uL	1.41	K/uL	144.5	K/uL	8.4	g/dL	13.65	%	25.35	%	3.6	g/dL	NULL	NULL	NULL	NULL	142.33	mEq/L	4.2	mEq/L	7.87	mg/dL	103.33	mEq/L	225.33	mg/dL	NULL	NULL	17	mEq/L	7.36	units	46	mm Hg	38.75	mm Hg
16910812	21609577	73	0	BLACK/AFRICAN AMERICAN	Medicare	English	SINGLE	NULL	NULL	NULL	NULL	NULL	NULL	NULL	NULL	NULL	NULL	NULL	NULL	NULL	NULL	NULL	NULL	NULL	NULL	NULL	NULL	NULL	NULL	NULL	NULL	NULL	NULL	NULL	NULL	NULL	NULL	NULL	NULL	NULL	NULL	NULL	NULL	NULL	NULL	NULL	NULL	NULL	NULL
16920759	24285149	66	1	WHITE	Medicaid	English	DIVORCED	11.6	K/uL	3.93	m/uL	NULL	NULL	NULL	NULL	181	K/uL	12.5	g/dL	12.8	%	38.1	%	2.6	g/dL	NULL	NULL	NULL	NULL	132	mEq/L	5.1	mEq/L	8.3	mg/dL	99	mEq/L	239	mg/dL	NULL	NULL	12	mEq/L	NULL	NULL	NULL	NULL	NULL	NULL
16928607	21249624	72	0	WHITE - OTHER EUROPEAN	Medicaid	English	WIDOWED	14.2	K/uL	5.87	m/uL	NULL	NULL	NULL	NULL	340	K/uL	14.4	g/dL	15.8	%	45.3	%	4.2	g/dL	NULL	NULL	NULL	NULL	136	mEq/L	4.4	mEq/L	9.7	mg/dL	103	mEq/L	169	mg/dL	7.3	%	13	mEq/L	NULL	NULL	NULL	NULL	NULL	NULL
16929472	28271419	85	1	UNKNOWN	Private	English	NULL	19.03	K/uL	4.53	m/uL	NULL	NULL	NULL	NULL	163.75	K/uL	12.28	g/dL	17.95	%	40.45	%	NULL	NULL	NULL	NULL	NULL	NULL	148.33	mEq/L	4.73	mEq/L	8.6	mg/dL	112.33	mEq/L	251.5	mg/dL	NULL	NULL	10.33	mEq/L	7.33	units	54	mm Hg	106.67	mm Hg
16941107	23689276	78	0	UNKNOWN	Medicare	English	NULL	15.1	K/uL	3.91	m/uL	12.05	K/uL	1.17	K/uL	435	K/uL	10.9	g/dL	14.5	%	37.85	%	4.1	g/dL	NULL	NULL	NULL	NULL	143	mEq/L	5.3	mEq/L	9.15	mg/dL	104	mEq/L	177.5	mg/dL	NULL	NULL	13.5	mEq/L	7.29	units	61.33	mm Hg	120	mm Hg
16945679	22590831	86	1	OTHER	Medicaid	Russian	MARRIED	11.65	K/uL	4.6	m/uL	NULL	NULL	NULL	NULL	178.5	K/uL	14.3	g/dL	14.2	%	42.7	%	4.2	g/dL	NULL	NULL	NULL	NULL	135.67	mEq/L	4.6	mEq/L	9.03	mg/dL	101	mEq/L	260.67	mg/dL	NULL	NULL	14	mEq/L	7.39	units	36.5	mm Hg	58.5	mm Hg
16950853	26330467	84	1	WHITE	Medicare	English	SINGLE	15.45	K/uL	2.45	m/uL	13.29	K/uL	1.33	K/uL	279	K/uL	7.75	g/dL	13.5	%	23.6	%	NULL	NULL	NULL	NULL	NULL	NULL	136	mEq/L	5.1	mEq/L	9.25	mg/dL	102.5	mEq/L	163.5	mg/dL	NULL	NULL	22	mEq/L	NULL	NULL	NULL	NULL	NULL	NULL
16955280	22251436	68	1	HISPANIC/LATINO - DOMINICAN	Medicare	Spanish	MARRIED	6.8	K/uL	3.33	m/uL	NULL	NULL	NULL	NULL	153	K/uL	10.5	g/dL	11.9	%	33.3	%	3.7	g/dL	NULL	NULL	NULL	NULL	142	mEq/L	4.65	mEq/L	8.65	mg/dL	101.5	mEq/L	144	mg/dL	NULL	NULL	16.5	mEq/L	7.34	units	41	mm Hg	48	mm Hg
16955775	22486661	79	1	UNKNOWN	Medicare	English	NULL	18.5	K/uL	2.65	m/uL	14.63	K/uL	1.69	K/uL	245	K/uL	8.13	g/dL	16.47	%	26.87	%	2	g/dL	NULL	NULL	NULL	NULL	152.25	mEq/L	3.37	mEq/L	7.67	mg/dL	112.33	mEq/L	206.33	mg/dL	NULL	NULL	12.33	mEq/L	7.44	units	48	mm Hg	84	mm Hg
16964311	21942657	81	1	WHITE	Medicare	English	MARRIED	NULL	NULL	NULL	NULL	NULL	NULL	NULL	NULL	NULL	NULL	NULL	NULL	NULL	NULL	NULL	NULL	NULL	NULL	NULL	NULL	NULL	NULL	139	mEq/L	5.5	mEq/L	8.7	mg/dL	107	mEq/L	115	mg/dL	NULL	NULL	23	mEq/L	NULL	NULL	NULL	NULL	NULL	NULL
16968810	28128841	61	1	WHITE	Private	English	MARRIED	23.53	K/uL	3.57	m/uL	23.74	K/uL	3.1	K/uL	158	K/uL	10.1	g/dL	14.23	%	31.53	%	4.3	g/dL	NULL	NULL	NULL	NULL	136	mEq/L	4	mEq/L	9.2	mg/dL	99.5	mEq/L	129	mg/dL	6.6	%	17.5	mEq/L	7.28	units	51	mm Hg	237.86	mm Hg
16979812	20402944	72	0	WHITE	Medicare	English	SINGLE	9.25	K/uL	3.81	m/uL	8.44	K/uL	0.59	K/uL	244	K/uL	10.95	g/dL	14.6	%	35.8	%	3.4	g/dL	NULL	NULL	NULL	NULL	142.5	mEq/L	3.85	mEq/L	8.2	mg/dL	102.5	mEq/L	167	mg/dL	NULL	NULL	16.5	mEq/L	NULL	NULL	NULL	NULL	NULL	NULL
16987608	25583399	93	0	WHITE	Medicare	English	WIDOWED	5.9	K/uL	3.26	m/uL	NULL	NULL	NULL	NULL	253.67	K/uL	7.77	g/dL	16.2	%	26.63	%	NULL	NULL	NULL	NULL	NULL	NULL	141	mEq/L	4.4	mEq/L	9	mg/dL	106	mEq/L	176	mg/dL	NULL	NULL	12	mEq/L	NULL	NULL	NULL	NULL	NULL	NULL
16995383	23454765	70	0	BLACK/AFRICAN AMERICAN	Private	English	MARRIED	7.9	K/uL	3.58	m/uL	NULL	NULL	NULL	NULL	227	K/uL	10.9	g/dL	12.9	%	32.2	%	NULL	NULL	NULL	NULL	NULL	NULL	142	mEq/L	3.7	mEq/L	8.9	mg/dL	103	mEq/L	98	mg/dL	NULL	NULL	15	mEq/L	NULL	NULL	NULL	NULL	NULL	NULL
16997272	20327810	80	1	UNKNOWN	Medicaid	Spanish	NULL	6.9	K/uL	4.73	m/uL	NULL	NULL	NULL	NULL	157	K/uL	13.5	g/dL	13.3	%	40.4	%	4.2	g/dL	NULL	NULL	NULL	NULL	137	mEq/L	3.9	mEq/L	10	mg/dL	104	mEq/L	113	mg/dL	6.7	%	9	mEq/L	NULL	NULL	NULL	NULL	NULL	NULL
16997581	29946981	77	0	WHITE	Medicare	English	MARRIED	8.7	K/uL	2.92	m/uL	NULL	NULL	NULL	NULL	396	K/uL	7.85	g/dL	16.3	%	27.05	%	NULL	NULL	NULL	NULL	NULL	NULL	144	mEq/L	5.5	mEq/L	9.6	mg/dL	104	mEq/L	189	mg/dL	NULL	NULL	16.5	mEq/L	NULL	NULL	NULL	NULL	NULL	NULL
17013291	25493276	78	1	WHITE	Medicare	English	MARRIED	NULL	NULL	NULL	NULL	NULL	NULL	NULL	NULL	NULL	NULL	NULL	NULL	NULL	NULL	NULL	NULL	NULL	NULL	NULL	NULL	NULL	NULL	143	mEq/L	3.3	mEq/L	9.55	mg/dL	102.5	mEq/L	136.5	mg/dL	NULL	NULL	16	mEq/L	7.48	units	38	mm Hg	81	mm Hg
17024365	21510605	61	1	WHITE	Medicaid	English	SINGLE	10.9	K/uL	3.81	m/uL	NULL	NULL	NULL	NULL	287	K/uL	11.2	g/dL	22.5	%	33.9	%	NULL	NULL	NULL	NULL	NULL	NULL	134	mEq/L	3.5	mEq/L	8.9	mg/dL	93	mEq/L	151	mg/dL	NULL	NULL	15	mEq/L	NULL	NULL	NULL	NULL	NULL	NULL
17029940	28274805	74	0	WHITE	Medicare	English	DIVORCED	NULL	NULL	NULL	NULL	NULL	NULL	NULL	NULL	NULL	NULL	NULL	NULL	NULL	NULL	NULL	NULL	NULL	NULL	NULL	NULL	NULL	NULL	NULL	NULL	NULL	NULL	NULL	NULL	NULL	NULL	NULL	NULL	NULL	NULL	NULL	NULL	NULL	NULL	NULL	NULL	NULL	NULL
17034026	29072931	78	1	WHITE	Medicare	English	MARRIED	140.14	K/uL	2.63	m/uL	60.39	K/uL	7.33	K/uL	37.86	K/uL	7.76	g/dL	15.03	%	22.37	%	3.7	g/dL	NULL	NULL	NULL	NULL	143.75	mEq/L	3.33	mEq/L	8.95	mg/dL	106.5	mEq/L	131.5	mg/dL	NULL	NULL	14.5	mEq/L	NULL	NULL	NULL	NULL	NULL	NULL
17038216	22394388	61	0	WHITE	Medicare	English	SINGLE	6.7	K/uL	3.14	m/uL	NULL	NULL	NULL	NULL	187	K/uL	9.8	g/dL	12.6	%	28.5	%	NULL	NULL	NULL	NULL	NULL	NULL	128	mEq/L	4.3	mEq/L	9.2	mg/dL	94	mEq/L	156	mg/dL	NULL	NULL	8	mEq/L	NULL	NULL	NULL	NULL	NULL	NULL
17044121	20410455	92	0	BLACK/AFRICAN AMERICAN	Medicare	English	WIDOWED	NULL	NULL	NULL	NULL	NULL	NULL	NULL	NULL	NULL	NULL	NULL	NULL	NULL	NULL	NULL	NULL	NULL	NULL	NULL	NULL	NULL	NULL	NULL	NULL	NULL	NULL	NULL	NULL	NULL	NULL	NULL	NULL	NULL	NULL	NULL	NULL	NULL	NULL	NULL	NULL	NULL	NULL
17046616	29825420	37	0	WHITE	Medicaid	English	SINGLE	11	K/uL	4.36	m/uL	6.49	K/uL	3.96	K/uL	130	K/uL	13	g/dL	13.6	%	41	%	NULL	NULL	NULL	NULL	NULL	NULL	139	mEq/L	3.5	mEq/L	8.4	mg/dL	102	mEq/L	314	mg/dL	NULL	NULL	10	mEq/L	NULL	NULL	NULL	NULL	NULL	NULL
17047470	24585634	56	0	UNABLE TO OBTAIN	Medicare	English	SINGLE	8	K/uL	5.15	m/uL	NULL	NULL	NULL	NULL	293	K/uL	12.6	g/dL	15.1	%	42.6	%	NULL	NULL	NULL	NULL	NULL	NULL	141	mEq/L	4	mEq/L	9.3	mg/dL	102	mEq/L	327	mg/dL	13.5	%	15	mEq/L	NULL	NULL	NULL	NULL	NULL	NULL
17055594	20727939	75	1	UNKNOWN	Medicare	English	MARRIED	13.1	K/uL	3.93	m/uL	NULL	NULL	NULL	NULL	126	K/uL	10.4	g/dL	16.9	%	33.5	%	NULL	NULL	NULL	NULL	NULL	NULL	133	mEq/L	5.4	mEq/L	8.8	mg/dL	102	mEq/L	145	mg/dL	NULL	NULL	10	mEq/L	7.28	units	47.4	mm Hg	52	mm Hg
17063212	22485859	52	1	WHITE	Medicare	English	SINGLE	6.2	K/uL	3.3	m/uL	3.63	K/uL	1.51	K/uL	162.5	K/uL	8.4	g/dL	19.9	%	27.15	%	2.9	g/dL	NULL	NULL	NULL	NULL	139	mEq/L	4.53	mEq/L	7.8	mg/dL	95.67	mEq/L	182.33	mg/dL	NULL	NULL	14.67	mEq/L	NULL	NULL	NULL	NULL	NULL	NULL
17067772	26204237	83	1	WHITE	Medicare	English	MARRIED	6.05	K/uL	2.79	m/uL	5.51	K/uL	0.23	K/uL	134.5	K/uL	8.25	g/dL	14.5	%	25.55	%	3.3	g/dL	NULL	NULL	NULL	NULL	143	mEq/L	3.85	mEq/L	8.15	mg/dL	103.5	mEq/L	121	mg/dL	NULL	NULL	14	mEq/L	NULL	NULL	NULL	NULL	NULL	NULL
17068031	29783414	71	0	WHITE	Medicare	English	DIVORCED	23.65	K/uL	4.35	m/uL	NULL	NULL	NULL	NULL	277.5	K/uL	14.05	g/dL	12.45	%	43.65	%	NULL	NULL	NULL	NULL	NULL	NULL	136	mEq/L	4.45	mEq/L	9	mg/dL	100	mEq/L	276	mg/dL	NULL	NULL	11.5	mEq/L	7.4	units	49	mm Hg	32	mm Hg
17079966	20077223	56	0	PORTUGUESE	Medicare	English	SINGLE	11.7	K/uL	4.94	m/uL	NULL	NULL	NULL	NULL	293	K/uL	15.1	g/dL	13.3	%	46	%	NULL	NULL	NULL	NULL	NULL	NULL	142.5	mEq/L	4.5	mEq/L	NULL	NULL	103.5	mEq/L	172	mg/dL	7.2	%	15	mEq/L	NULL	NULL	NULL	NULL	NULL	NULL
17100535	25571552	72	1	WHITE	Medicare	English	MARRIED	17.9	K/uL	3.13	m/uL	11.1	K/uL	3.75	K/uL	146.5	K/uL	9.3	g/dL	13.05	%	27.5	%	NULL	NULL	NULL	NULL	NULL	NULL	NULL	NULL	NULL	NULL	NULL	NULL	120	mEq/L	NULL	NULL	NULL	NULL	6	mEq/L	7.34	units	38.11	mm Hg	288.56	mm Hg
17100600	27190031	75	1	OTHER	Medicare	English	MARRIED	16.05	K/uL	3.16	m/uL	9.54	K/uL	2.52	K/uL	136	K/uL	10.05	g/dL	12.1	%	31.27	%	NULL	NULL	NULL	NULL	NULL	NULL	NULL	NULL	4.9	mEq/L	NULL	NULL	107	mEq/L	NULL	NULL	NULL	NULL	6	mEq/L	7.36	units	44	mm Hg	230.88	mm Hg
17115630	26018596	68	1	HISPANIC/LATINO - DOMINICAN	Medicare	Spanish	SINGLE	NULL	NULL	NULL	NULL	NULL	NULL	NULL	NULL	NULL	NULL	NULL	NULL	NULL	NULL	NULL	NULL	NULL	NULL	NULL	NULL	NULL	NULL	NULL	NULL	NULL	NULL	NULL	NULL	NULL	NULL	NULL	NULL	NULL	NULL	NULL	NULL	NULL	NULL	NULL	NULL	NULL	NULL
17129688	21342275	60	0	WHITE	Medicare	English	SINGLE	9.2	K/uL	3.17	m/uL	NULL	NULL	NULL	NULL	303	K/uL	9	g/dL	14.8	%	28.5	%	NULL	NULL	NULL	NULL	NULL	NULL	129.75	mEq/L	5.38	mEq/L	8.87	mg/dL	87	mEq/L	388.25	mg/dL	8.4	%	18.25	mEq/L	7.31	units	53.75	mm Hg	61.25	mm Hg
17135471	26473373	64	0	WHITE	Medicaid	English	WIDOWED	11.9	K/uL	4.39	m/uL	10.75	K/uL	0.66	K/uL	150	K/uL	11.67	g/dL	16.1	%	35.38	%	NULL	NULL	NULL	NULL	NULL	NULL	137.67	mEq/L	4.87	mEq/L	7.33	mg/dL	107.67	mEq/L	130.67	mg/dL	NULL	NULL	11.33	mEq/L	7.28	units	43.5	mm Hg	125.5	mm Hg
17139730	26289942	83	1	UNKNOWN	Medicare	English	MARRIED	16.6	K/uL	3.15	m/uL	5.87	K/uL	2.38	K/uL	165.5	K/uL	9.5	g/dL	15.5	%	30.13	%	NULL	NULL	NULL	NULL	NULL	NULL	142	mEq/L	4.1	mEq/L	NULL	NULL	108	mEq/L	110	mg/dL	NULL	NULL	13	mEq/L	7.44	units	39.33	mm Hg	208.57	mm Hg
17141347	27130150	67	1	WHITE	Medicare	English	MARRIED	9.75	K/uL	2.93	m/uL	7.04	K/uL	0.65	K/uL	373	K/uL	9.45	g/dL	15.35	%	28.3	%	3	g/dL	NULL	NULL	NULL	NULL	139	mEq/L	6.8	mEq/L	8.85	mg/dL	98.5	mEq/L	196.5	mg/dL	NULL	NULL	17.5	mEq/L	7.42	units	44	mm Hg	32	mm Hg
17145830	29648994	80	1	WHITE	Medicare	English	MARRIED	12.1	K/uL	3.12	m/uL	9.56	K/uL	1.29	K/uL	164	K/uL	10.3	g/dL	15	%	32.4	%	NULL	NULL	NULL	NULL	NULL	NULL	144	mEq/L	4.8	mEq/L	8.6	mg/dL	103	mEq/L	115	mg/dL	NULL	NULL	18	mEq/L	7.32	units	57	mm Hg	53	mm Hg
17149579	25815114	70	1	UNABLE TO OBTAIN	Medicare	English	NULL	12.2	K/uL	4.42	m/uL	11.44	K/uL	0.48	K/uL	174	K/uL	14.1	g/dL	13.3	%	42.4	%	2.6	g/dL	NULL	NULL	NULL	NULL	147.5	mEq/L	3.7	mEq/L	10.55	mg/dL	113.5	mEq/L	171.5	mg/dL	NULL	NULL	9	mEq/L	7.39	units	47	mm Hg	42	mm Hg
17161867	23091789	50	0	WHITE	Medicare	English	SINGLE	9.55	K/uL	5.42	m/uL	6.95	K/uL	1.62	K/uL	217.5	K/uL	14.75	g/dL	14.6	%	43.95	%	4.2	g/dL	NULL	NULL	8	g/dL	134.33	mEq/L	3.83	mEq/L	9.8	mg/dL	91	mEq/L	189.67	mg/dL	7.6	%	16	mEq/L	NULL	NULL	NULL	NULL	NULL	NULL
17171089	24634015	72	0	WHITE	Medicare	English	SINGLE	15.63	K/uL	3.4	m/uL	NULL	NULL	NULL	NULL	148.33	K/uL	10.33	g/dL	14.97	%	32.07	%	NULL	NULL	NULL	NULL	NULL	NULL	137.43	mEq/L	3.99	mEq/L	8.3	mg/dL	95.71	mEq/L	197.29	mg/dL	NULL	NULL	23.14	mEq/L	7.35	units	35.1	mm Hg	138.2	mm Hg
17175585	22895200	70	0	WHITE	Medicare	English	MARRIED	NULL	NULL	NULL	NULL	NULL	NULL	NULL	NULL	NULL	NULL	NULL	NULL	NULL	NULL	NULL	NULL	NULL	NULL	NULL	NULL	NULL	NULL	NULL	NULL	NULL	NULL	NULL	NULL	NULL	NULL	NULL	NULL	NULL	NULL	NULL	NULL	NULL	NULL	NULL	NULL	NULL	NULL
17176996	25317420	76	1	WHITE	Medicare	English	MARRIED	14.4	K/uL	3.53	m/uL	NULL	NULL	NULL	NULL	131	K/uL	10.3	g/dL	14.6	%	31.3	%	NULL	NULL	NULL	NULL	NULL	NULL	132	mEq/L	4.5	mEq/L	8.2	mg/dL	92	mEq/L	101	mg/dL	NULL	NULL	16	mEq/L	NULL	NULL	NULL	NULL	NULL	NULL
17186774	20996066	90	0	WHITE	Medicare	English	WIDOWED	NULL	NULL	NULL	NULL	NULL	NULL	NULL	NULL	NULL	NULL	NULL	NULL	NULL	NULL	NULL	NULL	NULL	NULL	NULL	NULL	NULL	NULL	NULL	NULL	NULL	NULL	NULL	NULL	NULL	NULL	NULL	NULL	NULL	NULL	NULL	NULL	NULL	NULL	NULL	NULL	NULL	NULL
17191294	24165060	77	1	WHITE	Medicare	English	MARRIED	11.5	K/uL	4.52	m/uL	NULL	NULL	NULL	NULL	186	K/uL	14.6	g/dL	13.1	%	44.7	%	4.2	g/dL	NULL	NULL	NULL	NULL	143	mEq/L	5.2	mEq/L	9.6	mg/dL	106	mEq/L	203	mg/dL	6.8	%	16	mEq/L	NULL	NULL	NULL	NULL	NULL	NULL
17199808	20016167	64	0	HISPANIC/LATINO - PUERTO RICAN	Private	Spanish	SINGLE	8.25	K/uL	3.79	m/uL	NULL	NULL	NULL	NULL	353.5	K/uL	11.8	g/dL	13.2	%	35.8	%	NULL	NULL	NULL	NULL	NULL	NULL	139	mEq/L	4.25	mEq/L	10.75	mg/dL	104	mEq/L	131	mg/dL	NULL	NULL	11	mEq/L	NULL	NULL	NULL	NULL	NULL	NULL
17202697	22544350	66	0	WHITE	Medicare	English	WIDOWED	6.8	K/uL	3.33	m/uL	NULL	NULL	NULL	NULL	123	K/uL	11.2	g/dL	13.7	%	35.9	%	NULL	NULL	NULL	NULL	NULL	NULL	141	mEq/L	3	mEq/L	8.8	mg/dL	98	mEq/L	213	mg/dL	NULL	NULL	14	mEq/L	NULL	NULL	NULL	NULL	NULL	NULL
17211916	26205403	73	0	HISPANIC/LATINO - PUERTO RICAN	Medicare	English	DIVORCED	NULL	NULL	NULL	NULL	NULL	NULL	NULL	NULL	NULL	NULL	NULL	NULL	NULL	NULL	NULL	NULL	NULL	NULL	NULL	NULL	NULL	NULL	137	mEq/L	4.5	mEq/L	NULL	NULL	102	mEq/L	NULL	NULL	NULL	NULL	15	mEq/L	NULL	NULL	NULL	NULL	NULL	NULL
17220028	28150110	87	0	WHITE	Medicare	English	SINGLE	8.67	K/uL	2.92	m/uL	NULL	NULL	NULL	NULL	225.33	K/uL	8.77	g/dL	13.4	%	27.07	%	4.3	g/dL	NULL	NULL	NULL	NULL	138	mEq/L	4.73	mEq/L	8.45	mg/dL	102.67	mEq/L	134.33	mg/dL	NULL	NULL	14	mEq/L	7.5	units	33	mm Hg	420	mm Hg
17224663	21981169	77	1	UNKNOWN	Medicare	English	NULL	8.75	K/uL	3.81	m/uL	6.32	K/uL	1.56	K/uL	215	K/uL	11.9	g/dL	15.7	%	38.25	%	NULL	NULL	NULL	NULL	NULL	NULL	141	mEq/L	4.4	mEq/L	8.9	mg/dL	101.5	mEq/L	140	mg/dL	NULL	NULL	12.5	mEq/L	NULL	NULL	NULL	NULL	NULL	NULL
17225559	23547279	78	1	WHITE	Medicare	English	MARRIED	9.2	K/uL	3.98	m/uL	NULL	NULL	NULL	NULL	236	K/uL	12.8	g/dL	13.4	%	39	%	3.6	g/dL	NULL	NULL	NULL	NULL	140	mEq/L	4	mEq/L	9.3	mg/dL	99	mEq/L	91	mg/dL	NULL	NULL	16	mEq/L	NULL	NULL	NULL	NULL	NULL	NULL
17233066	23800546	71	1	UNKNOWN	Medicare	English	NULL	9.3	K/uL	4.6	m/uL	NULL	NULL	NULL	NULL	211	K/uL	13.3	g/dL	14.3	%	41.3	%	4	g/dL	NULL	NULL	NULL	NULL	138	mEq/L	4.4	mEq/L	NULL	NULL	101	mEq/L	111	mg/dL	6.6	%	11	mEq/L	7.4	units	40.5	mm Hg	258.5	mm Hg
17237895	25356144	64	1	OTHER	Medicare	English	MARRIED	12.35	K/uL	3.74	m/uL	NULL	NULL	NULL	NULL	281.5	K/uL	11.45	g/dL	15.9	%	35.15	%	NULL	NULL	NULL	NULL	NULL	NULL	133	mEq/L	4.6	mEq/L	8.3	mg/dL	99	mEq/L	135	mg/dL	NULL	NULL	13	mEq/L	NULL	NULL	NULL	NULL	NULL	NULL
17241412	20806458	71	0	WHITE	Medicare	English	MARRIED	9.5	K/uL	2.56	m/uL	NULL	NULL	NULL	NULL	223	K/uL	7.6	g/dL	12.9	%	23.6	%	NULL	NULL	NULL	NULL	NULL	NULL	130	mEq/L	4.2	mEq/L	7	mg/dL	101	mEq/L	146	mg/dL	NULL	NULL	13	mEq/L	NULL	NULL	NULL	NULL	NULL	NULL
17248127	20552913	68	1	WHITE	Private	English	SINGLE	8.7	K/uL	4.91	m/uL	7.5	K/uL	0.62	K/uL	233	K/uL	15.2	g/dL	12.5	%	44.9	%	NULL	NULL	NULL	NULL	NULL	NULL	141	mEq/L	4.3	mEq/L	9.2	mg/dL	103	mEq/L	187	mg/dL	NULL	NULL	12	mEq/L	NULL	NULL	NULL	NULL	NULL	NULL
17251067	23019194	67	0	HISPANIC/LATINO - DOMINICAN	Medicaid	English	SINGLE	13.05	K/uL	4.01	m/uL	NULL	NULL	NULL	NULL	180	K/uL	11.15	g/dL	13.65	%	39.35	%	NULL	NULL	NULL	NULL	NULL	NULL	145.5	mEq/L	4	mEq/L	9.2	mg/dL	97	mEq/L	240.5	mg/dL	NULL	NULL	16.5	mEq/L	7.3	units	96.75	mm Hg	63.5	mm Hg
17254915	25611379	63	0	WHITE	Medicare	English	NULL	9.3	K/uL	4.75	m/uL	NULL	NULL	NULL	NULL	132	K/uL	12	g/dL	NULL	%	40.4	%	3.3	g/dL	NULL	NULL	NULL	NULL	136	mEq/L	3.9	mEq/L	8.9	mg/dL	98	mEq/L	224	mg/dL	NULL	NULL	13	mEq/L	NULL	NULL	NULL	NULL	NULL	NULL
17259367	21213784	63	1	WHITE	Other	English	MARRIED	NULL	NULL	NULL	NULL	NULL	NULL	NULL	NULL	NULL	NULL	NULL	NULL	NULL	NULL	NULL	NULL	NULL	NULL	NULL	NULL	NULL	NULL	NULL	NULL	NULL	NULL	NULL	NULL	NULL	NULL	NULL	NULL	NULL	NULL	NULL	NULL	NULL	NULL	NULL	NULL	NULL	NULL
17262521	21820380	60	1	WHITE	Medicaid	English	DIVORCED	9.55	K/uL	3.72	m/uL	6.68	K/uL	1.68	K/uL	199	K/uL	12.45	g/dL	12.3	%	36.15	%	NULL	NULL	NULL	NULL	NULL	NULL	139.5	mEq/L	4.55	mEq/L	NULL	NULL	101.5	mEq/L	117.5	mg/dL	5	%	11.5	mEq/L	NULL	NULL	NULL	NULL	NULL	NULL
17265550	21870214	73	1	WHITE	Medicaid	English	WIDOWED	9.25	K/uL	3.97	m/uL	NULL	NULL	NULL	NULL	254.5	K/uL	11.3	g/dL	13.1	%	33.65	%	3.2	g/dL	NULL	NULL	NULL	NULL	125	mEq/L	4.9	mEq/L	9.05	mg/dL	89	mEq/L	177.5	mg/dL	NULL	NULL	13.5	mEq/L	NULL	NULL	NULL	NULL	NULL	NULL
17266453	22261237	56	1	UNKNOWN	Medicare	English	DIVORCED	37	K/uL	3.94	m/uL	35.52	K/uL	0.74	K/uL	278	K/uL	9.6	g/dL	18.3	%	32.7	%	2.8	g/dL	NULL	NULL	NULL	NULL	134	mEq/L	5.1	mEq/L	8.2	mg/dL	91	mEq/L	268.5	mg/dL	NULL	NULL	21.5	mEq/L	7.35	units	56.5	mm Hg	136.33	mm Hg
17269824	21075448	74	1	WHITE	Medicare	English	SINGLE	NULL	NULL	NULL	NULL	NULL	NULL	NULL	NULL	NULL	NULL	NULL	NULL	NULL	NULL	NULL	NULL	NULL	NULL	NULL	NULL	NULL	NULL	NULL	NULL	NULL	NULL	NULL	NULL	NULL	NULL	NULL	NULL	NULL	NULL	NULL	NULL	NULL	NULL	NULL	NULL	NULL	NULL
17272252	24606364	68	0	WHITE	Medicare	English	DIVORCED	11.7	K/uL	4.48	m/uL	NULL	NULL	NULL	NULL	190	K/uL	14.1	g/dL	15.6	%	40.4	%	NULL	NULL	NULL	NULL	NULL	NULL	139	mEq/L	3.3	mEq/L	8.7	mg/dL	94	mEq/L	142	mg/dL	NULL	NULL	16	mEq/L	NULL	NULL	NULL	NULL	NULL	NULL
17273553	28087148	65	0	WHITE - OTHER EUROPEAN	Private	English	SINGLE	8.5	K/uL	4.3	m/uL	NULL	NULL	NULL	NULL	202	K/uL	12.8	g/dL	12.3	%	38.4	%	4.1	g/dL	NULL	NULL	NULL	NULL	146	mEq/L	4.3	mEq/L	8.9	mg/dL	110	mEq/L	87	mg/dL	NULL	NULL	13	mEq/L	NULL	NULL	NULL	NULL	NULL	NULL
17275331	22281333	66	1	WHITE - OTHER EUROPEAN	Private	English	MARRIED	7.5	K/uL	4.59	m/uL	NULL	NULL	NULL	NULL	232	K/uL	13.4	g/dL	13.7	%	43.9	%	NULL	NULL	NULL	NULL	NULL	NULL	138	mEq/L	4.6	mEq/L	9.4	mg/dL	101	mEq/L	117	mg/dL	NULL	NULL	10	mEq/L	NULL	NULL	NULL	NULL	NULL	NULL
17276051	28252276	59	1	UNKNOWN	Medicaid	English	NULL	10.2	K/uL	6.18	m/uL	NULL	NULL	NULL	NULL	247.33	K/uL	17.7	g/dL	15.97	%	52.4	%	4.7	g/dL	NULL	NULL	NULL	NULL	138	mEq/L	3.4	mEq/L	11.15	mg/dL	91	mEq/L	214	mg/dL	NULL	NULL	15	mEq/L	7.38	units	56	mm Hg	36	mm Hg
17276216	29887412	75	1	WHITE	Medicare	English	SINGLE	9.45	K/uL	4.37	m/uL	9.07	K/uL	0.45	K/uL	149.5	K/uL	13.55	g/dL	14.95	%	46.9	%	3.7	g/dL	NULL	NULL	NULL	NULL	144.33	mEq/L	4.2	mEq/L	8.1	mg/dL	103.33	mEq/L	106.67	mg/dL	7	%	14	mEq/L	7.3	units	64	mm Hg	34.5	mm Hg
17296211	25955168	72	0	WHITE	Medicare	English	MARRIED	8.15	K/uL	2.62	m/uL	5.62	K/uL	1.5	K/uL	203	K/uL	8.7	g/dL	13.6	%	26.07	%	NULL	NULL	NULL	NULL	NULL	NULL	136.5	mEq/L	4.1	mEq/L	7.3	mg/dL	108.5	mEq/L	125.5	mg/dL	NULL	NULL	14	mEq/L	NULL	NULL	NULL	NULL	NULL	NULL
17301359	22366218	67	1	WHITE	Other	English	SINGLE	21.1	K/uL	2.89	m/uL	10.83	K/uL	3.64	K/uL	166.67	K/uL	8.9	g/dL	13.87	%	27.78	%	NULL	NULL	NULL	NULL	NULL	NULL	NULL	NULL	NULL	NULL	NULL	NULL	109	mEq/L	NULL	NULL	NULL	NULL	11	mEq/L	7.32	units	43.88	mm Hg	172	mm Hg
17315288	29661182	89	1	HISPANIC/LATINO - PUERTO RICAN	Medicare	Spanish	MARRIED	5.7	K/uL	4.6	m/uL	NULL	NULL	NULL	NULL	196	K/uL	13.7	g/dL	14.8	%	42	%	NULL	NULL	NULL	NULL	NULL	NULL	143	mEq/L	3.7	mEq/L	8.9	mg/dL	102	mEq/L	104	mg/dL	NULL	NULL	18	mEq/L	7.39	units	51	mm Hg	64	mm Hg
17323127	21949366	83	1	WHITE	Medicare	English	MARRIED	10.13	K/uL	2.28	m/uL	NULL	NULL	NULL	NULL	162.75	K/uL	7.28	g/dL	13.4	%	23.73	%	3	g/dL	NULL	NULL	NULL	NULL	140.5	mEq/L	3.7	mEq/L	7.7	mg/dL	106	mEq/L	135.5	mg/dL	NULL	NULL	6.5	mEq/L	NULL	NULL	NULL	NULL	NULL	NULL
17324504	27378705	71	0	PATIENT DECLINED TO ANSWER	Medicare	English	MARRIED	NULL	NULL	NULL	NULL	NULL	NULL	NULL	NULL	NULL	NULL	NULL	NULL	NULL	NULL	NULL	NULL	NULL	NULL	NULL	NULL	NULL	NULL	NULL	NULL	NULL	NULL	NULL	NULL	NULL	NULL	NULL	NULL	NULL	NULL	NULL	NULL	NULL	NULL	NULL	NULL	NULL	NULL
17325134	28410687	63	0	PORTUGUESE	Medicare	English	SINGLE	NULL	NULL	NULL	NULL	NULL	NULL	NULL	NULL	NULL	NULL	NULL	NULL	NULL	NULL	NULL	NULL	NULL	NULL	NULL	NULL	NULL	NULL	NULL	NULL	NULL	NULL	NULL	NULL	NULL	NULL	NULL	NULL	NULL	NULL	NULL	NULL	7.37	units	82.75	mm Hg	97.2	mm Hg
17327851	29066515	65	1	WHITE	Medicare	English	SINGLE	11.56	K/uL	3.39	m/uL	15.42	K/uL	0.8	K/uL	390.2	K/uL	9.06	g/dL	18.2	%	27.03	%	2.5	g/dL	NULL	NULL	NULL	NULL	137.4	mEq/L	4.06	mEq/L	8.05	mg/dL	100.6	mEq/L	98.8	mg/dL	NULL	NULL	10.4	mEq/L	7.45	units	38.67	mm Hg	174.5	mm Hg
17334909	20212017	65	0	UNKNOWN	Medicaid	English	SINGLE	5.1	K/uL	6.73	m/uL	NULL	NULL	NULL	NULL	146	K/uL	18.6	g/dL	25.7	%	62.8	%	NULL	NULL	NULL	NULL	NULL	NULL	141	mEq/L	4.5	mEq/L	9.5	mg/dL	92	mEq/L	120	mg/dL	NULL	NULL	10	mEq/L	7.47	units	55	mm Hg	60.5	mm Hg
17337951	29916630	83	0	WHITE	Medicare	English	DIVORCED	NULL	NULL	NULL	NULL	NULL	NULL	NULL	NULL	NULL	NULL	NULL	NULL	NULL	NULL	NULL	NULL	NULL	NULL	NULL	NULL	NULL	NULL	NULL	NULL	NULL	NULL	NULL	NULL	NULL	NULL	NULL	NULL	NULL	NULL	NULL	NULL	NULL	NULL	NULL	NULL	NULL	NULL
17339718	25076654	61	0	WHITE	Medicare	English	SINGLE	4.9	K/uL	4.17	m/uL	NULL	NULL	NULL	NULL	169	K/uL	11.9	g/dL	13.9	%	36.9	%	NULL	NULL	NULL	NULL	NULL	NULL	144	mEq/L	4.5	mEq/L	9.1	mg/dL	103	mEq/L	61	mg/dL	NULL	NULL	13	mEq/L	NULL	NULL	NULL	NULL	NULL	NULL
17342522	24644463	66	0	WHITE	Private	English	SINGLE	16.8	K/uL	4.19	m/uL	NULL	NULL	NULL	NULL	364	K/uL	12.5	g/dL	13	%	38.2	%	NULL	NULL	NULL	NULL	NULL	NULL	139	mEq/L	3.7	mEq/L	8.9	mg/dL	103	mEq/L	160	mg/dL	NULL	NULL	13	mEq/L	NULL	NULL	NULL	NULL	NULL	NULL
17353808	22467790	73	0	WHITE	Medicare	English	MARRIED	NULL	NULL	NULL	NULL	NULL	NULL	NULL	NULL	NULL	NULL	NULL	NULL	NULL	NULL	NULL	NULL	NULL	NULL	NULL	NULL	NULL	NULL	NULL	NULL	NULL	NULL	NULL	NULL	NULL	NULL	NULL	NULL	NULL	NULL	NULL	NULL	NULL	NULL	NULL	NULL	NULL	NULL
17354940	22399670	53	0	HISPANIC/LATINO - PUERTO RICAN	Private	English	SINGLE	6.4	K/uL	4.47	m/uL	NULL	NULL	NULL	NULL	236	K/uL	13.3	g/dL	13.4	%	41.4	%	NULL	NULL	NULL	NULL	NULL	NULL	140	mEq/L	4.3	mEq/L	NULL	NULL	102	mEq/L	160	mg/dL	8.8	%	13	mEq/L	NULL	NULL	NULL	NULL	NULL	NULL
17356843	23115236	65	0	WHITE	Private	English	MARRIED	11.65	K/uL	4.35	m/uL	NULL	NULL	NULL	NULL	260.5	K/uL	13.2	g/dL	13.55	%	40.75	%	NULL	NULL	NULL	NULL	NULL	NULL	134	mEq/L	4.35	mEq/L	8.7	mg/dL	98.5	mEq/L	336	mg/dL	NULL	NULL	12	mEq/L	NULL	NULL	NULL	NULL	NULL	NULL
17360756	22555598	64	1	WHITE	Medicare	English	MARRIED	14.8	K/uL	4.39	m/uL	12.36	K/uL	1.44	K/uL	226	K/uL	12.4	g/dL	14.5	%	39.4	%	NULL	NULL	NULL	NULL	NULL	NULL	139	mEq/L	3.6	mEq/L	NULL	NULL	100	mEq/L	130	mg/dL	NULL	NULL	17	mEq/L	NULL	NULL	NULL	NULL	NULL	NULL
17374034	28349771	57	0	WHITE	Medicaid	English	SINGLE	9.35	K/uL	4.43	m/uL	6.04	K/uL	2.52	K/uL	212.5	K/uL	13.05	g/dL	13.35	%	39.2	%	4.05	g/dL	NULL	NULL	NULL	NULL	132.5	mEq/L	4.1	mEq/L	8.95	mg/dL	99.5	mEq/L	262	mg/dL	NULL	NULL	17	mEq/L	NULL	NULL	NULL	NULL	NULL	NULL
17398778	25051645	75	0	WHITE	Medicaid	English	SINGLE	9.47	K/uL	3.39	m/uL	7.11	K/uL	0.32	K/uL	175.33	K/uL	8.63	g/dL	15.9	%	29.83	%	3.8	g/dL	NULL	NULL	NULL	NULL	143.67	mEq/L	4.43	mEq/L	8.85	mg/dL	106	mEq/L	87	mg/dL	NULL	NULL	15	mEq/L	NULL	NULL	NULL	NULL	NULL	NULL
17410033	22197983	81	1	WHITE	Medicare	English	MARRIED	8.7	K/uL	4.21	m/uL	NULL	NULL	NULL	NULL	148	K/uL	11.8	g/dL	15.6	%	36.9	%	NULL	NULL	NULL	NULL	NULL	NULL	145	mEq/L	3.7	mEq/L	8.6	mg/dL	115	mEq/L	191	mg/dL	NULL	NULL	12	mEq/L	NULL	NULL	NULL	NULL	NULL	NULL
17431307	26167675	69	1	BLACK/AFRICAN	Medicaid	English	DIVORCED	NULL	NULL	NULL	NULL	NULL	NULL	NULL	NULL	NULL	NULL	NULL	NULL	NULL	NULL	NULL	NULL	NULL	NULL	NULL	NULL	NULL	NULL	NULL	NULL	NULL	NULL	NULL	NULL	NULL	NULL	NULL	NULL	NULL	NULL	NULL	NULL	NULL	NULL	NULL	NULL	NULL	NULL
17435385	24367567	56	1	WHITE	Private	English	MARRIED	NULL	NULL	NULL	NULL	NULL	NULL	NULL	NULL	NULL	NULL	NULL	NULL	NULL	NULL	NULL	NULL	NULL	NULL	NULL	NULL	NULL	NULL	NULL	NULL	NULL	NULL	NULL	NULL	NULL	NULL	NULL	NULL	NULL	NULL	NULL	NULL	NULL	NULL	NULL	NULL	NULL	NULL
17445175	24989952	71	1	WHITE	Medicare	English	NULL	NULL	NULL	NULL	NULL	NULL	NULL	NULL	NULL	NULL	NULL	NULL	NULL	NULL	NULL	NULL	NULL	NULL	NULL	NULL	NULL	NULL	NULL	135	mEq/L	3.5	mEq/L	8.3	mg/dL	95	mEq/L	224.5	mg/dL	NULL	NULL	18	mEq/L	NULL	NULL	NULL	NULL	NULL	NULL
17458497	22592615	80	0	BLACK/AFRICAN AMERICAN	Medicare	English	DIVORCED	NULL	NULL	NULL	NULL	NULL	NULL	NULL	NULL	NULL	NULL	NULL	NULL	NULL	NULL	NULL	NULL	NULL	NULL	NULL	NULL	NULL	NULL	NULL	NULL	NULL	NULL	NULL	NULL	NULL	NULL	NULL	NULL	NULL	NULL	NULL	NULL	NULL	NULL	NULL	NULL	NULL	NULL
17471151	23869172	71	0	OTHER	Medicare	Vietnamese	MARRIED	NULL	NULL	NULL	NULL	NULL	NULL	NULL	NULL	NULL	NULL	NULL	NULL	NULL	NULL	NULL	NULL	NULL	NULL	NULL	NULL	NULL	NULL	NULL	NULL	NULL	NULL	NULL	NULL	NULL	NULL	NULL	NULL	6.6	%	NULL	NULL	NULL	NULL	NULL	NULL	NULL	NULL
17482633	29907319	74	1	WHITE	Medicare	English	WIDOWED	9.1	K/uL	3.38	m/uL	NULL	NULL	NULL	NULL	389	K/uL	11	g/dL	17.6	%	32.2	%	NULL	NULL	NULL	NULL	NULL	NULL	122	mEq/L	4.8	mEq/L	9.9	mg/dL	87	mEq/L	83	mg/dL	NULL	NULL	19	mEq/L	NULL	NULL	NULL	NULL	NULL	NULL
17484350	28391486	78	0	WHITE	Medicare	English	WIDOWED	10.55	K/uL	2.58	m/uL	NULL	NULL	NULL	NULL	386.75	K/uL	7.4	g/dL	15.63	%	23.58	%	NULL	NULL	NULL	NULL	NULL	NULL	137	mEq/L	3.7	mEq/L	8.73	mg/dL	91	mEq/L	137	mg/dL	NULL	NULL	14	mEq/L	7.42	units	52	mm Hg	104.5	mm Hg
17496511	20489163	73	0	WHITE	Medicare	English	WIDOWED	NULL	NULL	NULL	NULL	NULL	NULL	NULL	NULL	NULL	NULL	NULL	NULL	NULL	NULL	NULL	NULL	NULL	NULL	NULL	NULL	NULL	NULL	NULL	NULL	NULL	NULL	NULL	NULL	NULL	NULL	NULL	NULL	NULL	NULL	NULL	NULL	NULL	NULL	NULL	NULL	NULL	NULL
17500421	22691808	56	0	WHITE	Private	English	MARRIED	9.5	K/uL	4.23	m/uL	NULL	NULL	NULL	NULL	184	K/uL	11.3	g/dL	14.7	%	35.9	%	NULL	NULL	NULL	NULL	NULL	NULL	NULL	NULL	NULL	NULL	NULL	NULL	NULL	NULL	NULL	NULL	NULL	NULL	NULL	NULL	NULL	NULL	NULL	NULL	NULL	NULL
17502921	24066848	81	0	WHITE	Medicare	English	WIDOWED	7	K/uL	2.69	m/uL	NULL	NULL	NULL	NULL	256	K/uL	7.9	g/dL	17	%	26	%	NULL	NULL	NULL	NULL	NULL	NULL	141	mEq/L	4.7	mEq/L	8.9	mg/dL	105	mEq/L	121	mg/dL	NULL	NULL	8	mEq/L	NULL	NULL	NULL	NULL	NULL	NULL
17505119	22141835	42	1	OTHER	Medicaid	English	SINGLE	7.5	K/uL	3.49	m/uL	NULL	NULL	NULL	NULL	210	K/uL	9.5	g/dL	13.6	%	29.1	%	NULL	NULL	NULL	NULL	NULL	NULL	132.5	mEq/L	4.3	mEq/L	8.6	mg/dL	97.5	mEq/L	361	mg/dL	12.3	%	9	mEq/L	NULL	NULL	NULL	NULL	NULL	NULL
17517428	27882923	80	0	UNKNOWN	Medicare	English	WIDOWED	11.75	K/uL	5.25	m/uL	NULL	NULL	NULL	NULL	230.5	K/uL	9.7	g/dL	19.5	%	32.7	%	NULL	NULL	NULL	NULL	NULL	NULL	143	mEq/L	3.85	mEq/L	8.4	mg/dL	105	mEq/L	139.5	mg/dL	NULL	NULL	12	mEq/L	NULL	NULL	NULL	NULL	NULL	NULL
17521616	29426360	75	0	BLACK/AFRICAN AMERICAN	Medicare	English	SINGLE	8.5	K/uL	4.08	m/uL	5.62	K/uL	0.9	K/uL	250.5	K/uL	9	g/dL	19.15	%	29.15	%	3.4	g/dL	NULL	NULL	NULL	NULL	141	mEq/L	3.83	mEq/L	9.37	mg/dL	107	mEq/L	160	mg/dL	NULL	NULL	10	mEq/L	NULL	NULL	NULL	NULL	NULL	NULL
17555102	27162054	59	0	OTHER	Private	English	SINGLE	9.8	K/uL	3.64	m/uL	NULL	NULL	NULL	NULL	253	K/uL	11.8	g/dL	12.3	%	35.5	%	NULL	NULL	NULL	NULL	NULL	NULL	140	mEq/L	4.2	mEq/L	NULL	NULL	104	mEq/L	101	mg/dL	NULL	NULL	17	mEq/L	NULL	NULL	NULL	NULL	NULL	NULL
17555635	25572188	61	1	WHITE	Private	English	MARRIED	6.7	K/uL	4.25	m/uL	NULL	NULL	NULL	NULL	170	K/uL	12.1	g/dL	14.2	%	37.3	%	NULL	NULL	NULL	NULL	NULL	NULL	143	mEq/L	3.9	mEq/L	8.9	mg/dL	101	mEq/L	119	mg/dL	NULL	NULL	17	mEq/L	NULL	NULL	NULL	NULL	NULL	NULL
17558146	20808085	58	1	WHITE	Medicaid	English	DIVORCED	7.3	K/uL	4.24	m/uL	5.01	K/uL	2.06	K/uL	154.5	K/uL	12.4	g/dL	13.45	%	38.65	%	3.2	g/dL	NULL	NULL	NULL	NULL	142.5	mEq/L	3.95	mEq/L	8.25	mg/dL	111	mEq/L	127	mg/dL	NULL	NULL	10	mEq/L	7.36	units	42	mm Hg	43	mm Hg
17560278	21353282	66	1	WHITE	Private	English	MARRIED	12.1	K/uL	4.33	m/uL	NULL	NULL	NULL	NULL	315	K/uL	13.5	g/dL	12.9	%	40.9	%	NULL	NULL	NULL	NULL	NULL	NULL	136	mEq/L	6.13	mEq/L	8.9	mg/dL	109	mEq/L	151	mg/dL	NULL	NULL	18	mEq/L	NULL	NULL	NULL	NULL	NULL	NULL
17567629	28765985	76	0	BLACK/AFRICAN AMERICAN	Medicare	English	DIVORCED	12.9	K/uL	3.71	m/uL	NULL	NULL	NULL	NULL	370	K/uL	10.8	g/dL	13.7	%	32.5	%	NULL	NULL	NULL	NULL	NULL	NULL	125	mEq/L	3.7	mEq/L	9.3	mg/dL	82	mEq/L	146	mg/dL	NULL	NULL	21	mEq/L	NULL	NULL	NULL	NULL	NULL	NULL
17572535	20182281	71	1	UNABLE TO OBTAIN	Medicare	English	MARRIED	NULL	NULL	NULL	NULL	NULL	NULL	NULL	NULL	NULL	NULL	NULL	NULL	NULL	NULL	NULL	NULL	NULL	NULL	NULL	NULL	NULL	NULL	NULL	NULL	NULL	NULL	NULL	NULL	NULL	NULL	NULL	NULL	NULL	NULL	NULL	NULL	NULL	NULL	NULL	NULL	NULL	NULL
17574570	25869704	62	0	WHITE	Medicaid	English	DIVORCED	5.6	K/uL	4.03	m/uL	NULL	NULL	NULL	NULL	175	K/uL	11.9	g/dL	12.8	%	36.4	%	NULL	NULL	NULL	NULL	NULL	NULL	139	mEq/L	3.8	mEq/L	8.6	mg/dL	111	mEq/L	86	mg/dL	NULL	NULL	8	mEq/L	NULL	NULL	NULL	NULL	NULL	NULL
17584533	23218321	74	1	WHITE	Medicare	English	SINGLE	6	K/uL	3.55	m/uL	5.28	K/uL	0.24	K/uL	205	K/uL	11	g/dL	15.8	%	35.4	%	NULL	NULL	NULL	NULL	NULL	NULL	144	mEq/L	5.1	mEq/L	9.55	mg/dL	101.5	mEq/L	212.5	mg/dL	NULL	NULL	14	mEq/L	7.37	units	52.67	mm Hg	37.67	mm Hg
17593617	28673468	79	1	UNKNOWN	Medicare	English	NULL	11.8	K/uL	3.62	m/uL	NULL	NULL	NULL	NULL	229	K/uL	11.4	g/dL	15.6	%	34.8	%	NULL	NULL	NULL	NULL	NULL	NULL	142	mEq/L	4.6	mEq/L	8.7	mg/dL	104	mEq/L	177	mg/dL	7.9	%	19	mEq/L	7.45	units	29	mm Hg	41	mm Hg
17594195	24451805	71	1	WHITE	Medicare	English	WIDOWED	7.7	K/uL	6.7	m/uL	5.77	K/uL	0.66	K/uL	166	K/uL	15.9	g/dL	19.8	%	55	%	3.6	g/dL	NULL	NULL	NULL	NULL	138	mEq/L	4.5	mEq/L	9.2	mg/dL	89	mEq/L	87	mg/dL	7.6	%	11	mEq/L	NULL	NULL	NULL	NULL	NULL	NULL
17597437	29755984	58	0	WHITE	No charge	English	MARRIED	8.8	K/uL	3.9	m/uL	NULL	NULL	NULL	NULL	328	K/uL	10.8	g/dL	13	%	34.6	%	NULL	NULL	NULL	NULL	NULL	NULL	140	mEq/L	4.1	mEq/L	9.1	mg/dL	101	mEq/L	94	mg/dL	NULL	NULL	15	mEq/L	NULL	NULL	NULL	NULL	NULL	NULL
17598213	27172401	85	0	WHITE	Medicare	English	WIDOWED	13.2	K/uL	4.02	m/uL	NULL	NULL	NULL	NULL	254	K/uL	11.8	g/dL	17	%	37.6	%	NULL	NULL	NULL	NULL	NULL	NULL	139	mEq/L	3.1	mEq/L	9.2	mg/dL	94	mEq/L	NULL	NULL	NULL	NULL	16	mEq/L	NULL	NULL	NULL	NULL	NULL	NULL
17602791	27486965	79	0	UNKNOWN	Medicaid	English	NULL	12.1	K/uL	3.28	m/uL	NULL	NULL	NULL	NULL	256	K/uL	9.5	g/dL	14.4	%	29.45	%	NULL	NULL	NULL	NULL	NULL	NULL	136.33	mEq/L	4.47	mEq/L	8.73	mg/dL	104	mEq/L	114.33	mg/dL	7.3	%	14	mEq/L	NULL	NULL	NULL	NULL	NULL	NULL
17607008	27939703	53	1	BLACK/AFRICAN AMERICAN	Medicaid	English	SINGLE	8.45	K/uL	4.14	m/uL	8.54	K/uL	0.34	K/uL	205	K/uL	10.2	g/dL	18.45	%	34.4	%	3.6	g/dL	NULL	NULL	6.9	g/dL	136	mEq/L	4.67	mEq/L	8.73	mg/dL	89.33	mEq/L	205	mg/dL	NULL	NULL	14	mEq/L	7.34	units	66.33	mm Hg	39.83	mm Hg
17609006	29436381	60	0	WHITE	Private	English	MARRIED	NULL	NULL	NULL	NULL	NULL	NULL	NULL	NULL	NULL	NULL	NULL	NULL	NULL	NULL	NULL	NULL	NULL	NULL	NULL	NULL	NULL	NULL	NULL	NULL	NULL	NULL	NULL	NULL	NULL	NULL	NULL	NULL	NULL	NULL	NULL	NULL	NULL	NULL	NULL	NULL	NULL	NULL
17609007	25252301	66	1	UNKNOWN	Other	English	MARRIED	14.2	K/uL	4.74	m/uL	NULL	NULL	NULL	NULL	261	K/uL	14.7	g/dL	12.8	%	43.6	%	NULL	NULL	NULL	NULL	NULL	NULL	135	mEq/L	3.8	mEq/L	8.6	mg/dL	102	mEq/L	264	mg/dL	NULL	NULL	13	mEq/L	7.29	units	50	mm Hg	73	mm Hg
17609199	22343147	69	0	BLACK/AFRICAN AMERICAN	Medicare	English	SINGLE	NULL	NULL	NULL	NULL	NULL	NULL	NULL	NULL	NULL	NULL	NULL	NULL	NULL	NULL	NULL	NULL	NULL	NULL	NULL	NULL	NULL	NULL	NULL	NULL	NULL	NULL	NULL	NULL	NULL	NULL	NULL	NULL	NULL	NULL	NULL	NULL	NULL	NULL	NULL	NULL	NULL	NULL
17609579	27968607	65	0	AMERICAN INDIAN/ALASKA NATIVE	Medicare	English	SINGLE	6.7	K/uL	3.55	m/uL	NULL	NULL	NULL	NULL	170	K/uL	10.9	g/dL	15.9	%	35.4	%	NULL	NULL	NULL	NULL	NULL	NULL	139	mEq/L	5.2	mEq/L	9.1	mg/dL	101	mEq/L	162	mg/dL	NULL	NULL	11	mEq/L	NULL	NULL	NULL	NULL	NULL	NULL
17623112	29449268	91	0	WHITE	Medicare	English	NULL	5.1	K/uL	3.65	m/uL	NULL	NULL	NULL	NULL	NULL	K/uL	10.95	g/dL	17.3	%	34.2	%	NULL	NULL	NULL	NULL	NULL	NULL	NULL	NULL	3.9	mEq/L	NULL	NULL	NULL	NULL	NULL	NULL	NULL	NULL	NULL	NULL	NULL	NULL	NULL	NULL	NULL	NULL
17623372	24533985	71	0	UNKNOWN	Medicare	English	MARRIED	14.1	K/uL	3.44	m/uL	11.54	K/uL	0.31	K/uL	288.5	K/uL	9.8	g/dL	14.4	%	30.9	%	3	g/dL	NULL	NULL	NULL	NULL	131.5	mEq/L	3.65	mEq/L	9.55	mg/dL	83	mEq/L	163	mg/dL	NULL	NULL	15	mEq/L	7.4	units	64	mm Hg	49.5	mm Hg
17629414	27617072	62	0	BLACK/AFRICAN AMERICAN	Medicaid	English	SINGLE	6	K/uL	5.13	m/uL	NULL	NULL	NULL	NULL	371	K/uL	11.9	g/dL	19.9	%	39.9	%	NULL	NULL	NULL	NULL	NULL	NULL	142	mEq/L	3.6	mEq/L	9.6	mg/dL	102	mEq/L	99	mg/dL	5.9	%	15	mEq/L	NULL	NULL	NULL	NULL	NULL	NULL
17634846	29288536	79	1	WHITE	Medicare	English	MARRIED	9.65	K/uL	3.22	m/uL	NULL	NULL	NULL	NULL	116.5	K/uL	10.3	g/dL	14.65	%	31.15	%	NULL	NULL	NULL	NULL	NULL	NULL	142	mEq/L	3.9	mEq/L	8.2	mg/dL	101	mEq/L	85	mg/dL	NULL	NULL	21	mEq/L	NULL	NULL	NULL	NULL	NULL	NULL
17635048	22020275	82	1	UNKNOWN	Private	English	NULL	12.5	K/uL	2.81	m/uL	NULL	NULL	NULL	NULL	147.5	K/uL	8.73	g/dL	13.73	%	24.55	%	NULL	NULL	NULL	NULL	NULL	NULL	125.5	mEq/L	5.24	mEq/L	7.47	mg/dL	95	mEq/L	151.4	mg/dL	NULL	NULL	11.25	mEq/L	7.35	units	37.33	mm Hg	171.67	mm Hg
17648769	21188205	84	0	WHITE	Medicare	English	WIDOWED	16.85	K/uL	3.06	m/uL	NULL	NULL	NULL	NULL	134	K/uL	7.95	g/dL	19.15	%	25.15	%	NULL	NULL	NULL	NULL	NULL	NULL	141.5	mEq/L	3.95	mEq/L	6.6	mg/dL	115.5	mEq/L	75.5	mg/dL	NULL	NULL	17.5	mEq/L	7.18	units	34.17	mm Hg	118.67	mm Hg
17651711	27498460	65	0	BLACK/AFRICAN AMERICAN	Medicaid	English	SINGLE	8.75	K/uL	3.46	m/uL	NULL	NULL	NULL	NULL	284	K/uL	10.75	g/dL	12.65	%	30.35	%	NULL	NULL	NULL	NULL	NULL	NULL	119.67	mEq/L	3.93	mEq/L	8.85	mg/dL	85.67	mEq/L	99.5	mg/dL	NULL	NULL	11.33	mEq/L	NULL	NULL	NULL	NULL	NULL	NULL
17661209	24633812	67	1	WHITE	Medicare	English	NULL	3.63	K/uL	3.11	m/uL	2.39	K/uL	0.58	K/uL	103	K/uL	8.57	g/dL	22.33	%	29.23	%	NULL	NULL	NULL	NULL	NULL	NULL	138.5	mEq/L	4.15	mEq/L	8.5	mg/dL	103	mEq/L	71	mg/dL	NULL	NULL	10.5	mEq/L	7.36	units	50	mm Hg	39	mm Hg
17675449	24658159	86	1	UNKNOWN	Medicare	English	MARRIED	9.15	K/uL	3.95	m/uL	8.02	K/uL	0.88	K/uL	174.5	K/uL	11.8	g/dL	14.95	%	37.15	%	NULL	NULL	NULL	NULL	NULL	NULL	141.67	mEq/L	4.5	mEq/L	9.67	mg/dL	104.67	mEq/L	170.33	mg/dL	NULL	NULL	18.33	mEq/L	7.46	units	37	mm Hg	73	mm Hg
17683532	20415705	80	1	WHITE	Medicare	English	MARRIED	20	K/uL	3.45	m/uL	NULL	NULL	NULL	NULL	297.67	K/uL	10.4	g/dL	15.3	%	33.73	%	NULL	NULL	NULL	NULL	NULL	NULL	140.33	mEq/L	3.93	mEq/L	8.13	mg/dL	111	mEq/L	178	mg/dL	NULL	NULL	17	mEq/L	7.24	units	39.11	mm Hg	106.22	mm Hg
17690422	26998767	79	0	WHITE	Medicare	English	WIDOWED	NULL	NULL	NULL	NULL	NULL	NULL	NULL	NULL	NULL	NULL	NULL	NULL	NULL	NULL	NULL	NULL	NULL	NULL	NULL	NULL	NULL	NULL	NULL	NULL	NULL	NULL	NULL	NULL	NULL	NULL	NULL	NULL	NULL	NULL	NULL	NULL	NULL	NULL	NULL	NULL	NULL	NULL
17697624	25340440	81	0	BLACK/CARIBBEAN ISLAND	Medicaid	Haitian	SINGLE	18.2	K/uL	3.26	m/uL	NULL	NULL	NULL	NULL	267	K/uL	8.1	g/dL	16.7	%	28.2	%	2.9	g/dL	NULL	NULL	NULL	NULL	161	mEq/L	3.85	mEq/L	8.65	mg/dL	123.5	mEq/L	196	mg/dL	NULL	NULL	17.5	mEq/L	7.42	units	33	mm Hg	202	mm Hg
17710039	26392274	77	1	UNKNOWN	Medicaid	English	NULL	12.8	K/uL	4.86	m/uL	NULL	NULL	NULL	NULL	240	K/uL	15.3	g/dL	13.2	%	44.7	%	NULL	NULL	NULL	NULL	NULL	NULL	129.33	mEq/L	3.9	mEq/L	8.7	mg/dL	93	mEq/L	143	mg/dL	NULL	NULL	15	mEq/L	7.34	units	45	mm Hg	45	mm Hg
17711559	23020659	72	0	WHITE	Medicare	Italian	DIVORCED	6.3	K/uL	4.48	m/uL	NULL	NULL	NULL	NULL	185	K/uL	11.4	g/dL	17.2	%	37.2	%	NULL	NULL	NULL	NULL	NULL	NULL	144	mEq/L	4.1	mEq/L	9.2	mg/dL	108	mEq/L	194	mg/dL	NULL	NULL	8	mEq/L	NULL	NULL	NULL	NULL	NULL	NULL
17717432	22712938	84	1	WHITE	Medicare	English	MARRIED	6.25	K/uL	3.57	m/uL	NULL	NULL	NULL	NULL	199.5	K/uL	11.9	g/dL	14.65	%	35.1	%	NULL	NULL	NULL	NULL	NULL	NULL	136.5	mEq/L	4.25	mEq/L	NULL	NULL	98.5	mEq/L	282	mg/dL	6.5	%	11.5	mEq/L	NULL	NULL	NULL	NULL	NULL	NULL
17726471	21115371	73	0	WHITE	Medicare	English	WIDOWED	10	K/uL	4.05	m/uL	NULL	NULL	NULL	NULL	261	K/uL	12.6	g/dL	13.6	%	38.7	%	NULL	NULL	NULL	NULL	NULL	NULL	136	mEq/L	4	mEq/L	9.1	mg/dL	101	mEq/L	106	mg/dL	NULL	NULL	15	mEq/L	NULL	NULL	NULL	NULL	NULL	NULL
17727342	25357829	71	0	WHITE	Medicare	English	DIVORCED	11.5	K/uL	3.23	m/uL	NULL	NULL	NULL	NULL	209	K/uL	9	g/dL	15.3	%	30.1	%	NULL	NULL	NULL	NULL	NULL	NULL	137	mEq/L	5.5	mEq/L	8.9	mg/dL	99	mEq/L	247	mg/dL	NULL	NULL	3	mEq/L	7.3	units	69	mm Hg	102	mm Hg
17728156	29251922	57	1	WHITE	Medicare	English	SINGLE	NULL	NULL	NULL	NULL	NULL	NULL	NULL	NULL	NULL	NULL	NULL	NULL	NULL	NULL	NULL	NULL	NULL	NULL	NULL	NULL	NULL	NULL	NULL	NULL	NULL	NULL	NULL	NULL	NULL	NULL	NULL	NULL	NULL	NULL	NULL	NULL	NULL	NULL	NULL	NULL	NULL	NULL
17738609	22459156	73	1	UNKNOWN	Medicare	English	NULL	9.95	K/uL	3.26	m/uL	8.21	K/uL	0.56	K/uL	157.5	K/uL	9.45	g/dL	12.6	%	29.25	%	NULL	NULL	NULL	NULL	NULL	NULL	140	mEq/L	4.45	mEq/L	8.3	mg/dL	101	mEq/L	158.5	mg/dL	NULL	NULL	20	mEq/L	7.32	units	46	mm Hg	94	mm Hg
17738824	29871129	56	0	UNKNOWN	Medicare	English	SINGLE	6.3	K/uL	4.36	m/uL	NULL	NULL	NULL	NULL	324	K/uL	11.1	g/dL	13.95	%	38.5	%	3.9	g/dL	NULL	NULL	NULL	NULL	137.5	mEq/L	3.9	mEq/L	9.6	mg/dL	89	mEq/L	96.5	mg/dL	6	%	13	mEq/L	7.35	units	70	mm Hg	62	mm Hg
17753782	24215285	50	0	WHITE	Medicaid	English	SINGLE	5.6	K/uL	4.89	m/uL	3.67	K/uL	1.51	K/uL	183	K/uL	13.9	g/dL	14.1	%	43.5	%	NULL	NULL	NULL	NULL	NULL	NULL	139	mEq/L	4	mEq/L	NULL	NULL	105	mEq/L	93	mg/dL	NULL	NULL	11	mEq/L	NULL	NULL	NULL	NULL	NULL	NULL
17757591	26023755	55	1	WHITE	Medicare	English	MARRIED	16	K/uL	3.52	m/uL	NULL	NULL	NULL	NULL	148	K/uL	10.2	g/dL	14.7	%	30.8	%	NULL	NULL	NULL	NULL	NULL	NULL	134	mEq/L	4	mEq/L	7.1	mg/dL	94	mEq/L	303	mg/dL	NULL	NULL	20	mEq/L	NULL	NULL	NULL	NULL	NULL	NULL
17759353	24016173	66	1	WHITE	Private	English	MARRIED	6	K/uL	4.06	m/uL	NULL	NULL	NULL	NULL	175	K/uL	11.6	g/dL	12.6	%	36.1	%	NULL	NULL	NULL	NULL	NULL	NULL	139	mEq/L	4.9	mEq/L	9.5	mg/dL	101	mEq/L	342	mg/dL	NULL	NULL	19	mEq/L	NULL	NULL	NULL	NULL	NULL	NULL
17759885	20509881	65	0	WHITE	Medicaid	English	DIVORCED	NULL	NULL	NULL	NULL	NULL	NULL	NULL	NULL	NULL	NULL	NULL	NULL	NULL	NULL	38.4	%	NULL	NULL	NULL	NULL	NULL	NULL	140	mEq/L	4.4	mEq/L	8.6	mg/dL	102	mEq/L	136	mg/dL	NULL	NULL	16	mEq/L	NULL	NULL	NULL	NULL	NULL	NULL
17760189	25724848	71	1	BLACK/AFRICAN AMERICAN	Medicare	Spanish	SINGLE	12.9	K/uL	5.02	m/uL	NULL	NULL	NULL	NULL	341	K/uL	15.1	g/dL	13.6	%	45.7	%	NULL	NULL	NULL	NULL	NULL	NULL	139	mEq/L	5	mEq/L	9.9	mg/dL	96	mEq/L	149	mg/dL	NULL	NULL	16	mEq/L	NULL	NULL	NULL	NULL	NULL	NULL
17760382	25665942	50	1	OTHER	Private	Spanish	MARRIED	10.2	K/uL	3.48	m/uL	7.27	K/uL	2.32	K/uL	34	K/uL	10.1	g/dL	19.1	%	31.45	%	3.6	g/dL	NULL	NULL	NULL	NULL	145	mEq/L	5.03	mEq/L	8.53	mg/dL	101.67	mEq/L	110	mg/dL	NULL	NULL	27.67	mEq/L	7.21	units	52	mm Hg	106	mm Hg
17763770	22223992	64	1	WHITE	Medicare	English	NULL	7.85	K/uL	2.75	m/uL	NULL	NULL	NULL	NULL	161	K/uL	8.7	g/dL	13.85	%	30.3	%	NULL	NULL	NULL	NULL	NULL	NULL	144.5	mEq/L	4.25	mEq/L	8.85	mg/dL	95.5	mEq/L	97	mg/dL	NULL	NULL	11.5	mEq/L	7.41	units	76.67	mm Hg	90	mm Hg
17763829	28414981	74	1	WHITE	Medicare	English	MARRIED	NULL	NULL	NULL	NULL	NULL	NULL	NULL	NULL	NULL	NULL	NULL	NULL	NULL	NULL	NULL	NULL	NULL	NULL	NULL	NULL	NULL	NULL	NULL	NULL	NULL	NULL	NULL	NULL	NULL	NULL	NULL	NULL	NULL	NULL	NULL	NULL	NULL	NULL	NULL	NULL	NULL	NULL
17768072	20879044	76	0	WHITE - OTHER EUROPEAN	Medicare	English	WIDOWED	12.7	K/uL	5.07	m/uL	NULL	NULL	NULL	NULL	280	K/uL	14.3	g/dL	15.3	%	44.9	%	NULL	NULL	NULL	NULL	NULL	NULL	136	mEq/L	3.7	mEq/L	9.7	mg/dL	99	mEq/L	252	mg/dL	NULL	NULL	14	mEq/L	NULL	NULL	NULL	NULL	NULL	NULL
17773363	28762012	76	0	WHITE	Medicare	English	WIDOWED	NULL	NULL	NULL	NULL	NULL	NULL	NULL	NULL	NULL	NULL	NULL	NULL	NULL	NULL	NULL	NULL	NULL	NULL	NULL	NULL	NULL	NULL	NULL	NULL	NULL	NULL	NULL	NULL	NULL	NULL	NULL	NULL	NULL	NULL	NULL	NULL	NULL	NULL	NULL	NULL	NULL	NULL
17783178	21988633	67	1	UNKNOWN	Medicare	English	NULL	11.3	K/uL	4.06	m/uL	NULL	NULL	NULL	NULL	195	K/uL	11.8	g/dL	14.7	%	37.8	%	4.1	g/dL	NULL	NULL	NULL	NULL	136	mEq/L	4.85	mEq/L	NULL	NULL	99.5	mEq/L	114	mg/dL	6.1	%	21	mEq/L	NULL	NULL	NULL	NULL	NULL	NULL
17784764	29345985	89	1	WHITE	Medicare	English	WIDOWED	7.4	K/uL	4.22	m/uL	NULL	NULL	NULL	NULL	219	K/uL	7.6	g/dL	18.8	%	29	%	3.3	g/dL	NULL	NULL	NULL	NULL	138	mEq/L	3.6	mEq/L	9	mg/dL	97	mEq/L	122	mg/dL	NULL	NULL	8	mEq/L	7.4	units	57	mm Hg	80	mm Hg
17789748	27458588	75	0	UNKNOWN	Medicare	English	NULL	6.8	K/uL	4.57	m/uL	NULL	NULL	NULL	NULL	256	K/uL	12.6	g/dL	14.2	%	39.6	%	NULL	NULL	NULL	NULL	NULL	NULL	144	mEq/L	4	mEq/L	9.1	mg/dL	104	mEq/L	111	mg/dL	NULL	NULL	15	mEq/L	NULL	NULL	NULL	NULL	NULL	NULL
17806475	25425740	60	0	UNKNOWN	Medicaid	English	NULL	13.04	K/uL	2.4	m/uL	11.5	K/uL	1.38	K/uL	25	K/uL	7.88	g/dL	15.18	%	21.88	%	2.57	g/dL	1.7	g/dL	4.2	g/dL	146.4	mEq/L	3.74	mEq/L	7.82	mg/dL	103.6	mEq/L	242.6	mg/dL	NULL	NULL	27	mEq/L	7.37	units	39.83	mm Hg	97.5	mm Hg
17816374	24141378	66	1	BLACK/AFRICAN	Medicare	English	WIDOWED	7.4	K/uL	3.55	m/uL	NULL	NULL	NULL	NULL	264	K/uL	10	g/dL	17.7	%	32.9	%	NULL	NULL	NULL	NULL	NULL	NULL	135	mEq/L	4.6	mEq/L	9.2	mg/dL	89	mEq/L	334	mg/dL	NULL	NULL	26	mEq/L	7.4	units	39	mm Hg	52	mm Hg
17829563	22747869	77	0	WHITE	Medicare	English	NULL	4.75	K/uL	3.03	m/uL	NULL	NULL	NULL	NULL	145.5	K/uL	8.35	g/dL	18.8	%	25.9	%	NULL	NULL	NULL	NULL	NULL	NULL	129	mEq/L	4.3	mEq/L	8.45	mg/dL	95.5	mEq/L	74.5	mg/dL	NULL	NULL	14	mEq/L	NULL	NULL	NULL	NULL	NULL	NULL
17842643	22585204	92	0	ASIAN - CHINESE	Medicare	Chinese	WIDOWED	NULL	NULL	NULL	NULL	NULL	NULL	NULL	NULL	NULL	NULL	NULL	NULL	NULL	NULL	NULL	NULL	NULL	NULL	NULL	NULL	NULL	NULL	NULL	NULL	NULL	NULL	NULL	NULL	NULL	NULL	NULL	NULL	NULL	NULL	NULL	NULL	NULL	NULL	NULL	NULL	NULL	NULL
17849164	22500605	54	1	WHITE	Medicaid	English	SINGLE	7.8	K/uL	5.33	m/uL	NULL	NULL	NULL	NULL	254	K/uL	14.2	g/dL	15.9	%	45.7	%	NULL	NULL	NULL	NULL	NULL	NULL	139	mEq/L	3.7	mEq/L	9.2	mg/dL	99	mEq/L	107	mg/dL	6	%	10	mEq/L	7.43	units	48	mm Hg	67	mm Hg
17849399	28722263	73	0	UNKNOWN	Medicare	English	NULL	8.25	K/uL	3	m/uL	NULL	NULL	NULL	NULL	108.83	K/uL	9	g/dL	14.97	%	24.93	%	NULL	NULL	NULL	NULL	NULL	NULL	129.2	mEq/L	3.48	mEq/L	7.1	mg/dL	98.2	mEq/L	219.2	mg/dL	NULL	NULL	16.2	mEq/L	7.22	units	36.2	mm Hg	189.2	mm Hg
17853869	25034436	74	1	WHITE	Medicare	English	DIVORCED	NULL	NULL	NULL	NULL	NULL	NULL	NULL	NULL	NULL	NULL	NULL	NULL	NULL	NULL	NULL	NULL	NULL	NULL	NULL	NULL	NULL	NULL	NULL	NULL	NULL	NULL	NULL	NULL	NULL	NULL	NULL	NULL	NULL	NULL	NULL	NULL	7.43	units	39	mm Hg	83	mm Hg
17854054	21000913	80	1	WHITE	Medicare	English	DIVORCED	NULL	NULL	NULL	NULL	NULL	NULL	NULL	NULL	NULL	NULL	NULL	NULL	NULL	NULL	NULL	NULL	NULL	NULL	NULL	NULL	NULL	NULL	NULL	NULL	NULL	NULL	NULL	NULL	NULL	NULL	NULL	NULL	NULL	NULL	NULL	NULL	NULL	NULL	NULL	NULL	NULL	NULL
17862068	29927280	60	0	HISPANIC/LATINO - PUERTO RICAN	Medicare	English	SINGLE	7.2	K/uL	4.5	m/uL	NULL	NULL	NULL	NULL	213	K/uL	13.1	g/dL	13.6	%	41	%	NULL	NULL	NULL	NULL	NULL	NULL	140	mEq/L	5.3	mEq/L	9.3	mg/dL	108	mEq/L	198	mg/dL	7	%	12	mEq/L	NULL	NULL	NULL	NULL	NULL	NULL
17862139	23565317	80	0	AMERICAN INDIAN/ALASKA NATIVE	Medicare	English	WIDOWED	NULL	NULL	NULL	NULL	NULL	NULL	NULL	NULL	NULL	NULL	NULL	NULL	NULL	NULL	NULL	NULL	NULL	NULL	NULL	NULL	NULL	NULL	NULL	NULL	NULL	NULL	NULL	NULL	NULL	NULL	NULL	NULL	NULL	NULL	NULL	NULL	NULL	NULL	NULL	NULL	NULL	NULL
17874073	24751437	88	1	WHITE	Medicare	English	MARRIED	20.2	K/uL	3.2	m/uL	NULL	NULL	NULL	NULL	147	K/uL	9.85	g/dL	15.4	%	31.6	%	NULL	NULL	NULL	NULL	NULL	NULL	143.5	mEq/L	4.53	mEq/L	8.73	mg/dL	100	mEq/L	220.75	mg/dL	NULL	NULL	17.75	mEq/L	7.35	units	55.33	mm Hg	46.83	mm Hg
17878555	24922169	76	0	WHITE - OTHER EUROPEAN	Medicare	English	SINGLE	4.3	K/uL	3.24	m/uL	NULL	NULL	NULL	NULL	255	K/uL	9.6	g/dL	16.3	%	31.2	%	3.2	g/dL	NULL	NULL	NULL	NULL	145	mEq/L	3.5	mEq/L	9	mg/dL	104	mEq/L	60	mg/dL	NULL	NULL	10	mEq/L	NULL	NULL	NULL	NULL	NULL	NULL
17883964	22493711	80	0	WHITE	Medicare	English	SINGLE	12.1	K/uL	2.71	m/uL	7.28	K/uL	0.72	K/uL	229	K/uL	7.95	g/dL	15.9	%	27.7	%	NULL	NULL	NULL	NULL	NULL	NULL	141	mEq/L	5.1	mEq/L	8.5	mg/dL	97	mEq/L	166.5	mg/dL	NULL	NULL	12.5	mEq/L	NULL	NULL	NULL	NULL	NULL	NULL
17884982	29275436	58	0	HISPANIC/LATINO - MEXICAN	Medicare	English	SINGLE	6.2	K/uL	3.7	m/uL	3.72	K/uL	1.34	K/uL	168	K/uL	10.9	g/dL	14	%	32.8	%	NULL	NULL	NULL	NULL	NULL	NULL	137	mEq/L	4.2	mEq/L	NULL	NULL	101	mEq/L	136	mg/dL	NULL	NULL	16	mEq/L	NULL	NULL	NULL	NULL	NULL	NULL
17889509	24459677	43	0	UNKNOWN	Medicare	Spanish	NULL	13.55	K/uL	2.85	m/uL	8.89	K/uL	2.38	K/uL	179.5	K/uL	8.75	g/dL	12.85	%	29.6	%	NULL	NULL	NULL	NULL	NULL	NULL	NULL	NULL	4.4	mEq/L	NULL	NULL	110	mEq/L	NULL	NULL	NULL	NULL	9	mEq/L	7.37	units	38	mm Hg	276.17	mm Hg
17898955	27592229	76	0	WHITE	Medicare	English	WIDOWED	18.98	K/uL	3.42	m/uL	16.02	K/uL	0.37	K/uL	102.25	K/uL	10.03	g/dL	16.28	%	32.13	%	NULL	NULL	NULL	NULL	NULL	NULL	147.5	mEq/L	4.63	mEq/L	9.05	mg/dL	96.5	mEq/L	239.75	mg/dL	NULL	NULL	12.75	mEq/L	7.39	units	75.33	mm Hg	36	mm Hg
17902592	21423568	67	0	WHITE	Medicare	English	MARRIED	13.05	K/uL	3.72	m/uL	NULL	NULL	NULL	NULL	103.5	K/uL	10.4	g/dL	13.65	%	33.35	%	NULL	NULL	NULL	NULL	NULL	NULL	131.33	mEq/L	4.43	mEq/L	8.77	mg/dL	94.67	mEq/L	234.67	mg/dL	NULL	NULL	16	mEq/L	NULL	NULL	NULL	NULL	NULL	NULL
17904802	26767612	49	0	WHITE	Medicaid	English	DIVORCED	NULL	NULL	NULL	NULL	NULL	NULL	NULL	NULL	NULL	NULL	NULL	NULL	NULL	NULL	NULL	NULL	NULL	NULL	NULL	NULL	NULL	NULL	NULL	NULL	NULL	NULL	NULL	NULL	NULL	NULL	NULL	NULL	NULL	NULL	NULL	NULL	NULL	NULL	NULL	NULL	NULL	NULL
17913580	20020792	44	0	WHITE	Medicare	English	SINGLE	9.85	K/uL	4.36	m/uL	NULL	NULL	NULL	NULL	157.5	K/uL	13.6	g/dL	11.85	%	38.95	%	3.1	g/dL	NULL	NULL	NULL	NULL	135.5	mEq/L	3.6	mEq/L	NULL	NULL	97.5	mEq/L	311	mg/dL	13.1	%	7	mEq/L	NULL	NULL	NULL	NULL	NULL	NULL
17915707	23943945	73	0	WHITE	Medicare	English	MARRIED	15.6	K/uL	3.35	m/uL	NULL	NULL	NULL	NULL	340.33	K/uL	7.4	g/dL	20.17	%	24.9	%	3.2	g/dL	NULL	NULL	NULL	NULL	139.5	mEq/L	3.7	mEq/L	7.85	mg/dL	103.5	mEq/L	194.5	mg/dL	NULL	NULL	12.5	mEq/L	7.36	units	49	mm Hg	34	mm Hg
17921203	23771823	74	0	UNABLE TO OBTAIN	Medicare	English	NULL	11	K/uL	3.83	m/uL	NULL	NULL	NULL	NULL	343.33	K/uL	9.07	g/dL	17.8	%	33.53	%	3.3	g/dL	NULL	NULL	NULL	NULL	145	mEq/L	3.75	mEq/L	10.2	mg/dL	102.5	mEq/L	134.5	mg/dL	NULL	NULL	6.5	mEq/L	7.3	units	81	mm Hg	76.25	mm Hg
17925279	29052335	74	1	UNKNOWN	Medicare	English	MARRIED	10.78	K/uL	3.41	m/uL	7.16	K/uL	0.96	K/uL	223.5	K/uL	10.1	g/dL	13.33	%	31.68	%	3.4	g/dL	NULL	NULL	NULL	NULL	138	mEq/L	4.8	mEq/L	9.5	mg/dL	103.67	mEq/L	276	mg/dL	7	%	13.33	mEq/L	7.35	units	41.6	mm Hg	219.6	mm Hg
17927067	29075668	58	0	WHITE	Medicare	English	MARRIED	11.7	K/uL	3.38	m/uL	NULL	NULL	NULL	NULL	144	K/uL	10.2	g/dL	13.2	%	33.1	%	NULL	NULL	NULL	NULL	NULL	NULL	139.33	mEq/L	4.37	mEq/L	8.33	mg/dL	107.67	mEq/L	225	mg/dL	NULL	NULL	12.67	mEq/L	7.33	units	43	mm Hg	85.67	mm Hg
17929514	28092904	51	0	PATIENT DECLINED TO ANSWER	Medicaid	English	SINGLE	12.25	K/uL	2.04	m/uL	NULL	NULL	NULL	NULL	316	K/uL	6.37	g/dL	14.8	%	20.77	%	2.9	g/dL	NULL	NULL	NULL	NULL	137	mEq/L	4.9	mEq/L	6.6	mg/dL	94	mEq/L	167	mg/dL	NULL	NULL	21	mEq/L	NULL	NULL	NULL	NULL	NULL	NULL
17929955	24147356	77	0	UNKNOWN	Medicare	English	WIDOWED	15.4	K/uL	5.02	m/uL	10.95	K/uL	1.73	K/uL	165	K/uL	13.9	g/dL	18.75	%	43.85	%	NULL	NULL	NULL	NULL	NULL	NULL	140	mEq/L	4.1	mEq/L	9	mg/dL	97	mEq/L	95.5	mg/dL	NULL	NULL	12.5	mEq/L	7.47	units	43	mm Hg	55	mm Hg
17934334	23646060	91	0	UNKNOWN	Medicare	English	NULL	36.77	K/uL	4.01	m/uL	NULL	NULL	NULL	NULL	173.67	K/uL	11.83	g/dL	14.23	%	36.05	%	3.1	g/dL	NULL	NULL	NULL	NULL	145	mEq/L	4.55	mEq/L	8.4	mg/dL	112.75	mEq/L	125	mg/dL	NULL	NULL	18.25	mEq/L	7.31	units	40.67	mm Hg	136	mm Hg
17941085	26958388	88	0	WHITE	Medicare	English	WIDOWED	8.1	K/uL	4.09	m/uL	NULL	NULL	NULL	NULL	168	K/uL	12.6	g/dL	14.4	%	38.3	%	NULL	NULL	NULL	NULL	NULL	NULL	141	mEq/L	4.7	mEq/L	9	mg/dL	108	mEq/L	65	mg/dL	6.4	%	19	mEq/L	NULL	NULL	NULL	NULL	NULL	NULL
17948507	23599627	78	0	WHITE	Medicare	English	MARRIED	25.13	K/uL	3.97	m/uL	10.39	K/uL	1	K/uL	98.33	K/uL	10.78	g/dL	15.83	%	34.02	%	2.4	g/dL	NULL	NULL	NULL	NULL	139	mEq/L	4.25	mEq/L	8.6	mg/dL	105	mEq/L	122	mg/dL	NULL	NULL	13.4	mEq/L	7.33	units	43.79	mm Hg	194.21	mm Hg
17962629	29491722	71	0	PORTUGUESE	Medicaid	Portuguese	DIVORCED	NULL	NULL	NULL	NULL	NULL	NULL	NULL	NULL	NULL	NULL	NULL	NULL	NULL	NULL	NULL	NULL	NULL	NULL	NULL	NULL	NULL	NULL	NULL	NULL	NULL	NULL	NULL	NULL	NULL	NULL	NULL	NULL	NULL	NULL	NULL	NULL	NULL	NULL	NULL	NULL	NULL	NULL
17983652	23573758	80	1	WHITE	Medicare	English	MARRIED	NULL	NULL	NULL	NULL	NULL	NULL	NULL	NULL	NULL	NULL	NULL	NULL	NULL	NULL	NULL	NULL	NULL	NULL	NULL	NULL	NULL	NULL	NULL	NULL	NULL	NULL	NULL	NULL	NULL	NULL	NULL	NULL	NULL	NULL	NULL	NULL	NULL	NULL	NULL	NULL	NULL	NULL
17984356	25758208	60	0	OTHER	Medicaid	English	SINGLE	6.6	K/uL	3.93	m/uL	NULL	NULL	NULL	NULL	198	K/uL	9.9	g/dL	16.4	%	30	%	NULL	NULL	NULL	NULL	NULL	NULL	134	mEq/L	4.1	mEq/L	8	mg/dL	104	mEq/L	71	mg/dL	NULL	NULL	17	mEq/L	NULL	NULL	NULL	NULL	NULL	NULL
17989583	21126877	85	1	WHITE	Medicare	English	WIDOWED	7.9	K/uL	3.65	m/uL	NULL	NULL	NULL	NULL	193	K/uL	11.8	g/dL	13.1	%	33.8	%	3.6	g/dL	NULL	NULL	NULL	NULL	124.5	mEq/L	4.1	mEq/L	8.7	mg/dL	88	mEq/L	127	mg/dL	NULL	NULL	15	mEq/L	NULL	NULL	NULL	NULL	NULL	NULL
17994442	23140789	87	0	ASIAN	Medicaid	Thai	WIDOWED	11	K/uL	4.12	m/uL	NULL	NULL	NULL	NULL	244	K/uL	11.1	g/dL	13.8	%	34.3	%	3.5	g/dL	NULL	NULL	NULL	NULL	138	mEq/L	3.9	mEq/L	9.35	mg/dL	101	mEq/L	180.5	mg/dL	NULL	NULL	13.5	mEq/L	NULL	NULL	NULL	NULL	NULL	NULL
18000663	24583755	64	1	WHITE	Private	English	WIDOWED	NULL	NULL	NULL	NULL	NULL	NULL	NULL	NULL	NULL	NULL	NULL	NULL	NULL	NULL	NULL	NULL	NULL	NULL	NULL	NULL	NULL	NULL	NULL	NULL	NULL	NULL	NULL	NULL	NULL	NULL	NULL	NULL	NULL	NULL	NULL	NULL	NULL	NULL	NULL	NULL	NULL	NULL
18013691	29717768	71	0	WHITE	Medicare	English	SINGLE	NULL	NULL	NULL	NULL	NULL	NULL	NULL	NULL	NULL	NULL	NULL	NULL	NULL	NULL	NULL	NULL	NULL	NULL	NULL	NULL	NULL	NULL	137	mEq/L	4.8	mEq/L	NULL	NULL	NULL	NULL	NULL	NULL	NULL	NULL	NULL	NULL	NULL	NULL	NULL	NULL	NULL	NULL
18016391	29171579	45	0	WHITE	Private	English	MARRIED	16.15	K/uL	3.94	m/uL	NULL	NULL	NULL	NULL	339	K/uL	10.85	g/dL	16.75	%	35.45	%	NULL	NULL	NULL	NULL	NULL	NULL	139	mEq/L	3.85	mEq/L	7.95	mg/dL	103.5	mEq/L	168	mg/dL	NULL	NULL	18	mEq/L	7.26	units	55.75	mm Hg	128.25	mm Hg
18017704	24991618	55	0	UNKNOWN	Medicaid	Spanish	SINGLE	13	K/uL	4.3	m/uL	NULL	NULL	NULL	NULL	233.5	K/uL	14.7	g/dL	15.05	%	45.1	%	3.2	g/dL	NULL	NULL	NULL	NULL	138	mEq/L	5.9	mEq/L	8.5	mg/dL	100.5	mEq/L	161.5	mg/dL	NULL	NULL	10.5	mEq/L	7.37	units	54.67	mm Hg	85	mm Hg
18021365	21419474	70	1	WHITE	Medicare	English	MARRIED	8.8	K/uL	NULL	NULL	NULL	NULL	NULL	NULL	208	K/uL	NULL	NULL	NULL	NULL	36.9	%	NULL	NULL	NULL	NULL	NULL	NULL	135	mEq/L	4.3	mEq/L	NULL	NULL	97	mEq/L	144	mg/dL	NULL	NULL	14	mEq/L	NULL	NULL	NULL	NULL	NULL	NULL
18023758	23358090	65	1	WHITE	Medicare	English	NULL	8.1	K/uL	5.32	m/uL	NULL	NULL	NULL	NULL	175	K/uL	16.5	g/dL	13.2	%	48	%	3.7	g/dL	NULL	NULL	6.4	g/dL	137	mEq/L	3.8	mEq/L	NULL	NULL	103	mEq/L	277	mg/dL	12.6	%	11	mEq/L	NULL	NULL	NULL	NULL	NULL	NULL
18031815	27309896	57	1	WHITE	NULL	English	MARRIED	23.7	K/uL	3.95	m/uL	19.12	K/uL	3.39	K/uL	181.33	K/uL	12.87	g/dL	12.83	%	41.1	%	NULL	NULL	NULL	NULL	NULL	NULL	141	mEq/L	5.17	mEq/L	7.93	mg/dL	97	mEq/L	674.67	mg/dL	NULL	NULL	24.33	mEq/L	6.99	units	89.63	mm Hg	192.25	mm Hg
18032706	28144042	58	1	WHITE	Private	English	MARRIED	13.4	K/uL	4.05	m/uL	NULL	NULL	NULL	NULL	200	K/uL	12.9	g/dL	13.2	%	40.8	%	NULL	NULL	NULL	NULL	NULL	NULL	140	mEq/L	5.3	mEq/L	8.3	mg/dL	103	mEq/L	127	mg/dL	NULL	NULL	12	mEq/L	7.33	units	55	mm Hg	101.6	mm Hg
18054380	25566782	53	1	WHITE	Medicare	English	MARRIED	NULL	NULL	NULL	NULL	NULL	NULL	NULL	NULL	NULL	NULL	NULL	NULL	NULL	NULL	NULL	NULL	NULL	NULL	NULL	NULL	NULL	NULL	NULL	NULL	NULL	NULL	NULL	NULL	NULL	NULL	NULL	NULL	NULL	NULL	NULL	NULL	NULL	NULL	NULL	NULL	NULL	NULL
18055895	26773767	87	1	WHITE	Medicare	English	SINGLE	NULL	NULL	NULL	NULL	NULL	NULL	NULL	NULL	NULL	NULL	NULL	NULL	NULL	NULL	NULL	NULL	NULL	NULL	NULL	NULL	NULL	NULL	NULL	NULL	NULL	NULL	NULL	NULL	NULL	NULL	NULL	NULL	NULL	NULL	NULL	NULL	NULL	NULL	NULL	NULL	NULL	NULL
18057668	27314682	75	1	WHITE	Medicare	English	MARRIED	9.4	K/uL	3.93	m/uL	NULL	NULL	NULL	NULL	170	K/uL	10.8	g/dL	18	%	33.4	%	NULL	NULL	NULL	NULL	NULL	NULL	140	mEq/L	4.6	mEq/L	8.8	mg/dL	102	mEq/L	205	mg/dL	NULL	NULL	16	mEq/L	7.33	units	48.33	mm Hg	90.67	mm Hg
18062853	25026306	80	0	BLACK/CARIBBEAN ISLAND	Medicaid	Haitian	SINGLE	NULL	NULL	NULL	NULL	NULL	NULL	NULL	NULL	NULL	NULL	NULL	NULL	NULL	NULL	NULL	NULL	NULL	NULL	NULL	NULL	NULL	NULL	NULL	NULL	NULL	NULL	NULL	NULL	NULL	NULL	NULL	NULL	NULL	NULL	NULL	NULL	NULL	NULL	NULL	NULL	NULL	NULL
18078692	26545545	67	0	WHITE - OTHER EUROPEAN	Medicare	English	WIDOWED	12.03	K/uL	2.44	m/uL	7.85	K/uL	1.19	K/uL	39.67	K/uL	8.33	g/dL	22.8	%	25.97	%	4	g/dL	NULL	NULL	6.6	g/dL	149.67	mEq/L	4.1	mEq/L	12.37	mg/dL	114	mEq/L	107	mg/dL	NULL	NULL	12	mEq/L	7.34	units	47.67	mm Hg	82.67	mm Hg
18083807	25310847	56	0	UNKNOWN	Medicaid	English	NULL	15.3	K/uL	6.03	m/uL	12.52	K/uL	0.97	K/uL	170	K/uL	16.65	g/dL	14.5	%	53.4	%	3.8	g/dL	NULL	NULL	NULL	NULL	141.5	mEq/L	4.05	mEq/L	9.9	mg/dL	106	mEq/L	183	mg/dL	NULL	NULL	13	mEq/L	7.32	units	48.75	mm Hg	48.5	mm Hg
18086262	20276255	57	0	WHITE	Medicaid	English	SINGLE	7.9	K/uL	3.97	m/uL	NULL	NULL	NULL	NULL	190	K/uL	12.2	g/dL	14.3	%	41.1	%	NULL	NULL	NULL	NULL	NULL	NULL	146	mEq/L	4.8	mEq/L	9.4	mg/dL	104	mEq/L	176	mg/dL	NULL	NULL	13	mEq/L	7.3	units	66.75	mm Hg	39.75	mm Hg
18088666	27610828	64	0	BLACK/CARIBBEAN ISLAND	Medicare	English	MARRIED	6.5	K/uL	3.25	m/uL	NULL	NULL	NULL	NULL	188	K/uL	9.38	g/dL	15.4	%	31	%	4.2	g/dL	NULL	NULL	NULL	NULL	147	mEq/L	4.5	mEq/L	10.1	mg/dL	108	mEq/L	138	mg/dL	8.6	%	21	mEq/L	NULL	NULL	NULL	NULL	NULL	NULL
18089505	22501385	91	0	BLACK/AFRICAN AMERICAN	Medicare	English	WIDOWED	NULL	NULL	NULL	NULL	NULL	NULL	NULL	NULL	NULL	NULL	NULL	NULL	NULL	NULL	NULL	NULL	NULL	NULL	NULL	NULL	NULL	NULL	127	mEq/L	5.4	mEq/L	7.7	mg/dL	94	mEq/L	91	mg/dL	NULL	NULL	16	mEq/L	NULL	NULL	NULL	NULL	NULL	NULL
18094048	24351124	80	0	WHITE - OTHER EUROPEAN	Medicare	English	MARRIED	13.3	K/uL	4.33	m/uL	10.07	K/uL	1.59	K/uL	238.5	K/uL	13.5	g/dL	15	%	42.8	%	NULL	NULL	NULL	NULL	NULL	NULL	139	mEq/L	4.4	mEq/L	9	mg/dL	100.5	mEq/L	102.5	mg/dL	NULL	NULL	16.5	mEq/L	NULL	NULL	NULL	NULL	NULL	NULL
18100313	21752882	69	0	UNABLE TO OBTAIN	Medicare	English	NULL	21.7	K/uL	3.48	m/uL	NULL	NULL	NULL	NULL	248	K/uL	10.3	g/dL	17.43	%	32.93	%	NULL	NULL	NULL	NULL	NULL	NULL	134.33	mEq/L	4.73	mEq/L	7.97	mg/dL	100.33	mEq/L	90.33	mg/dL	NULL	NULL	12.33	mEq/L	7.25	units	55.6	mm Hg	129.4	mm Hg
18106646	23994912	51	0	BLACK/AFRICAN AMERICAN	Medicare	English	SINGLE	NULL	NULL	NULL	NULL	NULL	NULL	NULL	NULL	NULL	NULL	NULL	NULL	NULL	NULL	NULL	NULL	NULL	NULL	NULL	NULL	NULL	NULL	NULL	NULL	NULL	NULL	NULL	NULL	NULL	NULL	NULL	NULL	NULL	NULL	NULL	NULL	NULL	NULL	NULL	NULL	NULL	NULL
18111741	24650867	79	1	WHITE	Medicare	English	MARRIED	7.5	K/uL	3.81	m/uL	NULL	NULL	NULL	NULL	144	K/uL	11.6	g/dL	14.6	%	37	%	NULL	NULL	NULL	NULL	NULL	NULL	141	mEq/L	4.8	mEq/L	9	mg/dL	104	mEq/L	149	mg/dL	7.7	%	16	mEq/L	NULL	NULL	NULL	NULL	NULL	NULL
18113330	20341500	63	1	WHITE	Private	English	SINGLE	NULL	NULL	NULL	NULL	NULL	NULL	NULL	NULL	NULL	NULL	NULL	NULL	NULL	NULL	NULL	NULL	NULL	NULL	NULL	NULL	NULL	NULL	NULL	NULL	NULL	NULL	NULL	NULL	NULL	NULL	NULL	NULL	NULL	NULL	NULL	NULL	NULL	NULL	NULL	NULL	NULL	NULL
18115975	21229752	63	0	WHITE	Medicare	English	DIVORCED	NULL	NULL	NULL	NULL	NULL	NULL	NULL	NULL	NULL	NULL	NULL	NULL	NULL	NULL	NULL	NULL	NULL	NULL	NULL	NULL	NULL	NULL	NULL	NULL	NULL	NULL	NULL	NULL	NULL	NULL	NULL	NULL	NULL	NULL	NULL	NULL	NULL	NULL	NULL	NULL	NULL	NULL
18124252	24978179	79	0	UNKNOWN	Medicare	English	NULL	20	K/uL	3.95	m/uL	NULL	NULL	NULL	NULL	494.5	K/uL	11.25	g/dL	14.1	%	35.7	%	NULL	NULL	NULL	NULL	NULL	NULL	139.5	mEq/L	3.85	mEq/L	9.45	mg/dL	103.5	mEq/L	117	mg/dL	NULL	NULL	12.5	mEq/L	NULL	NULL	NULL	NULL	NULL	NULL
18126184	21445578	77	1	WHITE - RUSSIAN	Medicaid	Russian	MARRIED	9.1	K/uL	2.89	m/uL	NULL	NULL	NULL	NULL	295	K/uL	10.3	g/dL	13.2	%	32.3	%	NULL	NULL	NULL	NULL	NULL	NULL	NULL	NULL	NULL	NULL	NULL	NULL	NULL	NULL	NULL	NULL	NULL	NULL	NULL	NULL	NULL	NULL	NULL	NULL	NULL	NULL
18128425	23138929	87	0	WHITE	Medicare	English	MARRIED	24.5	K/uL	3.76	m/uL	NULL	NULL	NULL	NULL	116	K/uL	10.4	g/dL	13.8	%	32.9	%	NULL	NULL	NULL	NULL	NULL	NULL	136	mEq/L	4.1	mEq/L	8.9	mg/dL	100	mEq/L	160	mg/dL	NULL	NULL	19	mEq/L	7.33	units	38.57	mm Hg	222.71	mm Hg
18139299	28845275	65	1	WHITE	Private	English	MARRIED	9.2	K/uL	3.87	m/uL	NULL	NULL	NULL	NULL	151.5	K/uL	10.75	g/dL	15.15	%	34.5	%	3.8	g/dL	NULL	NULL	NULL	NULL	137.33	mEq/L	3.87	mEq/L	8.23	mg/dL	97	mEq/L	195.67	mg/dL	NULL	NULL	14.33	mEq/L	7.27	units	65	mm Hg	32	mm Hg
18145994	26382375	61	1	UNABLE TO OBTAIN	Medicare	English	MARRIED	4.27	K/uL	2.39	m/uL	NULL	NULL	NULL	NULL	66.33	K/uL	7.53	g/dL	17.7	%	22.8	%	NULL	NULL	NULL	NULL	NULL	NULL	137	mEq/L	4.1	mEq/L	9	mg/dL	102	mEq/L	138	mg/dL	NULL	NULL	15	mEq/L	7.38	units	36.67	mm Hg	211.67	mm Hg
18148192	22089767	59	0	UNKNOWN	Medicare	English	NULL	6.35	K/uL	4.17	m/uL	5.02	K/uL	0.88	K/uL	125.5	K/uL	11.7	g/dL	14.8	%	39.7	%	2.9	g/dL	NULL	NULL	NULL	NULL	143.67	mEq/L	3.8	mEq/L	7.73	mg/dL	100.67	mEq/L	140	mg/dL	NULL	NULL	11	mEq/L	7.42	units	55	mm Hg	72.75	mm Hg
18148776	27754867	81	0	WHITE - BRAZILIAN	Medicaid	Portuguese	WIDOWED	7.1	K/uL	3.92	m/uL	NULL	NULL	NULL	NULL	212	K/uL	11.3	g/dL	14.5	%	34.7	%	NULL	NULL	NULL	NULL	NULL	NULL	138	mEq/L	4.1	mEq/L	9.9	mg/dL	104	mEq/L	106	mg/dL	NULL	NULL	12	mEq/L	NULL	NULL	NULL	NULL	NULL	NULL
18148840	26928780	72	1	ASIAN - SOUTH EAST ASIAN	Medicare	English	MARRIED	NULL	NULL	NULL	NULL	NULL	NULL	NULL	NULL	NULL	NULL	NULL	NULL	NULL	NULL	NULL	NULL	NULL	NULL	NULL	NULL	NULL	NULL	NULL	NULL	NULL	NULL	NULL	NULL	NULL	NULL	NULL	NULL	NULL	NULL	NULL	NULL	NULL	NULL	NULL	NULL	NULL	NULL
18151826	24319491	68	0	WHITE - OTHER EUROPEAN	Medicare	Other	MARRIED	9.6	K/uL	4.62	m/uL	NULL	NULL	NULL	NULL	256	K/uL	13.7	g/dL	14.1	%	42.6	%	NULL	NULL	NULL	NULL	NULL	NULL	142	mEq/L	4.45	mEq/L	NULL	NULL	104	mEq/L	119	mg/dL	NULL	NULL	20	mEq/L	NULL	NULL	NULL	NULL	NULL	NULL
18162695	25473893	75	0	WHITE	Medicare	English	MARRIED	11.5	K/uL	4.29	m/uL	8.24	K/uL	1.86	K/uL	321	K/uL	12.2	g/dL	13.7	%	38.5	%	NULL	NULL	NULL	NULL	NULL	NULL	141	mEq/L	3.9	mEq/L	9.2	mg/dL	105.5	mEq/L	127.5	mg/dL	NULL	NULL	9.5	mEq/L	NULL	NULL	NULL	NULL	NULL	NULL
18165455	29490255	77	1	WHITE	Private	English	MARRIED	NULL	NULL	NULL	NULL	NULL	NULL	NULL	NULL	NULL	NULL	NULL	NULL	NULL	NULL	NULL	NULL	NULL	NULL	NULL	NULL	NULL	NULL	NULL	NULL	NULL	NULL	NULL	NULL	NULL	NULL	NULL	NULL	NULL	NULL	NULL	NULL	NULL	NULL	NULL	NULL	NULL	NULL
18170068	26329372	60	1	UNKNOWN	Medicaid	English	NULL	8.03	K/uL	4.71	m/uL	NULL	NULL	NULL	NULL	246	K/uL	11.77	g/dL	17.17	%	40.33	%	NULL	NULL	NULL	NULL	NULL	NULL	141	mEq/L	4.43	mEq/L	8.03	mg/dL	105.33	mEq/L	185.67	mg/dL	NULL	NULL	10.67	mEq/L	7.39	units	40	mm Hg	86.86	mm Hg
18170124	25468891	75	1	WHITE	Medicare	English	MARRIED	10.5	K/uL	4.2	m/uL	NULL	NULL	NULL	NULL	217	K/uL	10.2	g/dL	18.2	%	33.9	%	NULL	NULL	NULL	NULL	NULL	NULL	139	mEq/L	3.8	mEq/L	8.3	mg/dL	100	mEq/L	107	mg/dL	NULL	NULL	20	mEq/L	NULL	NULL	NULL	NULL	NULL	NULL
18175579	29023378	67	0	WHITE	Medicare	English	MARRIED	NULL	NULL	NULL	NULL	NULL	NULL	NULL	NULL	NULL	NULL	NULL	NULL	NULL	NULL	NULL	NULL	NULL	NULL	NULL	NULL	NULL	NULL	NULL	NULL	NULL	NULL	NULL	NULL	NULL	NULL	NULL	NULL	NULL	NULL	NULL	NULL	NULL	NULL	NULL	NULL	NULL	NULL
18187609	23495898	67	1	UNKNOWN	Medicare	English	NULL	18.65	K/uL	4.35	m/uL	NULL	NULL	NULL	NULL	177.5	K/uL	13	g/dL	13.55	%	39.65	%	3.2	g/dL	NULL	NULL	NULL	NULL	139	mEq/L	4.67	mEq/L	7.73	mg/dL	103.67	mEq/L	321	mg/dL	NULL	NULL	19.33	mEq/L	7.31	units	42.25	mm Hg	93.5	mm Hg
18188001	22058275	53	1	WHITE	Private	English	MARRIED	9.6	K/uL	2.74	m/uL	NULL	NULL	NULL	NULL	169	K/uL	7.9	g/dL	14.45	%	23.25	%	NULL	NULL	NULL	NULL	NULL	NULL	139.5	mEq/L	4.3	mEq/L	7.85	mg/dL	103	mEq/L	177	mg/dL	NULL	NULL	13.5	mEq/L	NULL	NULL	NULL	NULL	NULL	NULL
18197523	27877383	68	1	BLACK/AFRICAN AMERICAN	Medicare	English	SINGLE	3.5	K/uL	3.95	m/uL	NULL	NULL	NULL	NULL	180	K/uL	12.2	g/dL	13.2	%	36.9	%	NULL	NULL	NULL	NULL	NULL	NULL	141	mEq/L	4.7	mEq/L	9.1	mg/dL	107	mEq/L	88	mg/dL	NULL	NULL	14	mEq/L	NULL	NULL	NULL	NULL	NULL	NULL
18197787	22629493	92	1	UNKNOWN	Medicaid	English	NULL	16.43	K/uL	3.58	m/uL	NULL	NULL	NULL	NULL	181.5	K/uL	9.25	g/dL	20.6	%	30.78	%	NULL	NULL	NULL	NULL	NULL	NULL	139.5	mEq/L	4.18	mEq/L	7.7	mg/dL	101.75	mEq/L	124.25	mg/dL	NULL	NULL	14.75	mEq/L	7.33	units	47.75	mm Hg	43.75	mm Hg
18210684	24964323	70	1	WHITE	Medicare	English	SINGLE	7.1	K/uL	4.27	m/uL	5.02	K/uL	1.16	K/uL	93	K/uL	9	g/dL	23.2	%	29.7	%	3	g/dL	NULL	NULL	NULL	NULL	139.5	mEq/L	6	mEq/L	NULL	NULL	103.5	mEq/L	91	mg/dL	NULL	NULL	22	mEq/L	NULL	NULL	NULL	NULL	NULL	NULL
18215873	28987617	69	1	WHITE	Medicare	English	DIVORCED	4.5	K/uL	3.76	m/uL	NULL	NULL	NULL	NULL	189	K/uL	8.8	g/dL	16.7	%	29.9	%	NULL	NULL	NULL	NULL	NULL	NULL	136	mEq/L	3.3	mEq/L	9.4	mg/dL	92	mEq/L	109	mg/dL	NULL	NULL	9	mEq/L	NULL	NULL	NULL	NULL	NULL	NULL
18216048	20897195	70	0	WHITE	Medicare	English	SINGLE	28.3	K/uL	4.15	m/uL	26.04	K/uL	0.28	K/uL	144	K/uL	11.2	g/dL	19.6	%	36.7	%	NULL	NULL	NULL	NULL	NULL	NULL	139	mEq/L	3.7	mEq/L	8.2	mg/dL	105	mEq/L	162	mg/dL	NULL	NULL	14	mEq/L	7.35	units	45.5	mm Hg	56.5	mm Hg
18220597	20814115	85	0	WHITE	Private	English	MARRIED	17.9	K/uL	4.59	m/uL	NULL	NULL	NULL	NULL	582	K/uL	11.6	g/dL	20.5	%	40.4	%	NULL	NULL	NULL	NULL	NULL	NULL	148	mEq/L	4.5	mEq/L	NULL	NULL	107	mEq/L	97	mg/dL	NULL	NULL	14	mEq/L	NULL	NULL	NULL	NULL	NULL	NULL
18226317	24959920	67	1	WHITE	Medicare	English	MARRIED	10.6	K/uL	4.76	m/uL	NULL	NULL	NULL	NULL	143	K/uL	13.5	g/dL	14.2	%	39.4	%	NULL	NULL	NULL	NULL	NULL	NULL	137	mEq/L	4.1	mEq/L	9.2	mg/dL	100	mEq/L	125	mg/dL	NULL	NULL	16	mEq/L	NULL	NULL	NULL	NULL	NULL	NULL
18227470	25168604	75	1	BLACK/AFRICAN AMERICAN	Medicare	English	MARRIED	9.1	K/uL	4	m/uL	NULL	NULL	NULL	NULL	265	K/uL	11.3	g/dL	13.4	%	34.8	%	NULL	NULL	NULL	NULL	NULL	NULL	140	mEq/L	3.7	mEq/L	NULL	NULL	101	mEq/L	112	mg/dL	NULL	NULL	15	mEq/L	NULL	NULL	NULL	NULL	NULL	NULL
18244995	23028781	77	0	WHITE	Medicare	English	MARRIED	8.3	K/uL	3.6	m/uL	NULL	NULL	NULL	NULL	305	K/uL	10.4	g/dL	14.2	%	33.3	%	3.4	g/dL	NULL	NULL	NULL	NULL	139	mEq/L	4.1	mEq/L	9.1	mg/dL	100	mEq/L	108	mg/dL	NULL	NULL	14	mEq/L	NULL	NULL	NULL	NULL	NULL	NULL
18253212	26470528	75	0	UNKNOWN	Medicare	Spanish	NULL	11	K/uL	3.48	m/uL	NULL	NULL	NULL	NULL	205	K/uL	10.2	g/dL	15.6	%	32.9	%	NULL	NULL	NULL	NULL	NULL	NULL	149	mEq/L	5.6	mEq/L	9.2	mg/dL	109	mEq/L	204	mg/dL	NULL	NULL	16	mEq/L	NULL	NULL	NULL	NULL	NULL	NULL
18261594	24313032	77	1	WHITE	Medicare	English	MARRIED	8.6	K/uL	4.06	m/uL	NULL	NULL	NULL	NULL	411	K/uL	12.8	g/dL	14.1	%	39.5	%	NULL	NULL	NULL	NULL	NULL	NULL	140	mEq/L	4.6	mEq/L	9.6	mg/dL	106	mEq/L	93	mg/dL	NULL	NULL	13	mEq/L	NULL	NULL	NULL	NULL	NULL	NULL
18261707	29866120	72	1	WHITE	Medicare	English	MARRIED	10.65	K/uL	3.98	m/uL	12.21	K/uL	1.1	K/uL	260	K/uL	12.5	g/dL	13.4	%	39	%	NULL	NULL	NULL	NULL	NULL	NULL	140.5	mEq/L	5.15	mEq/L	9.05	mg/dL	103.5	mEq/L	221	mg/dL	NULL	NULL	16	mEq/L	7.27	units	52	mm Hg	115	mm Hg
[truncated: 4,257 more rows]
[truncated: 101 more columns]
